# Supplementary material for: Determinants and perception of health insurance participation among healthcare providers in Nigeria: A mixed-methods study
Source: PubMed Central journal article supplement (PMC8336839; doi:10.1371/journal.pone.0255206), 2021-08-04
Supplement: pone.0255206.s001.pdf [file pone.0255206.s001.pdf]

### ACTIVE PRIMARY HCP AS AT JULY 19TH 2017

|    | HCP CODE | HCP NAME                                                     | ADDRESS                                     |
|----|----------|--------------------------------------------------------------|---------------------------------------------|
| 1  | AB/0001  | Sancta Maria Specialist & Mat.                               | 22 Constitution Crescent Aba                |
| 2  | AB/0003  | Janet Memorial Hospital                                      | 245 Aba-Owerri Road, Aba                    |
| 3  | AB/0004  | Abia State University Teaching Hospital                      | Aba                                         |
| 4  | AB/0005  | Life Care Clinics Ltd                                        | 8, Ezinkwu Street, Aba                      |
| 5  | AB/0006  | New Era Specialist Hospital                                  | 213/215 Ezikiwe Road, Aba                   |
| 6  | AB/0007  | John Okorie Memorial Hospital                                | 12-14 Akabuogu Street Off P.H. Road, Aba    |
| 7  | AB/0013  | Delta Hospital Ltd.                                          | 78, Faulks Road                             |
| 8  | AB/0014  | Federal Medical Centre, Umuahia                              | Umuahia, Abia State                         |
| 9  | AB/0015  | Obioma Hospital & Maternity                                  | 21, School Road, Umuahia                    |
| 10 | AB/0016  | Priscillia Memorial Hospital                                 | 32, Bunny Street                            |
| 11 | AB/0018  | General Hospital, Ama-Achara                                 | Ama-Achara, Umuahia                         |
| 12 | AB/0019  | Mendel Hospital & Diagnostic Centre Limited                  | 20 Tenant Road, Abia                        |
| 13 | AB/0020  | Clehansan Hospital & Maternity                               | 17 Osusu Rd, Aba.                           |
| 14 | AB/0022  | Alpha Inland Hospital                                        | 36 Glass Industry Road, Aba                 |
| 15 | AB/0023  | Todac Clinic Ltd.                                            | 59/61 Okigwe Road, Aba                      |
| 16 | AB/0024  | Living Word Hospital                                         | 5/7 Umuochoam Street, Aba                   |
| 17 | AB/0025  | Living Word Hospital                                         | 117 Ikot Ekpene Road, Aba                   |
| 18 | AB/0027  | Eberra Hospital                                              | 3rd Avenue, Ubani Estate Ogbor Hill, Aba    |
| 19 | AB/0028  | Horstman Hospital                                            | 32, Okigwe Road, Aba                        |
| 20 | AB/0030  | Princess Mary Specialist Hospital                            | 45, New Umuahia Road Ogbor Hill, Aba        |
| 21 | AB/0031  | Austin Grace Hospital                                        | 16, Okigwe Road, Aba                        |
| 22 | AB/0034  | St. Paul Hospital                                            | 6-12 St. Paul's Road, Umunggasi, Aba        |
| 23 | AB/0035  | Seven Days Adventist Hospital                                | Umuoba Road, Aba                            |
| 24 | AB/0036  | New Lead Hospital & Mat. Ltd                                 | 10, Oblagu Ave/By 160 Faulks Road, Aba.     |
| 25 | AB/0038  | Hammersmith Medical Centre                                   | Plots 3 Amauzkwu Layout, Umuahia            |
| 26 | AB/0039  | St. Vincent's Hospital                                       | 30 Azikwe Road Umuahia                      |
| 27 | AB/0041  | New Era Hospital & Maternity                                 | 90b Oji River Street Umuzukwu Layout        |
| 28 | AB/0090  | DSS Clinic                                                   | Umuahia, Abia State                         |
| 29 | AB/0093  | Police Hospital, Umuahia                                     | Abia State Police Command, Abia State       |
| 30 | AB/0094  | Sick bay NNLS Owerenta                                       | Abia, Abia State                            |
| 31 | AB/0095  | The Nazareth Clinics                                         | 57 Pound Road, Aba. Abia State              |
| 32 | AB/0097  | Isaac Okwuonu Memorial Hospital                              | 155 Ikot-Ekpene Road, Ogbor Hill, Aba.      |
| 33 | AB/0098  | Spring Clinic                                                | 18 Scotland Crescent, Aba                   |
| 34 | AB/0104  | National Root Crops Research Institute Staff Clinic, Umudike | Umudike, Umuahia                            |
| 35 | AB/0107  | Healing Cross Hospital                                       | Kilometre 2 Bende Road, Umuahia, Abia State |
| 36 | AB/0110  | Aloma specialist hospital                                    | 9(108) aba road, umuahia                    |

|    |         |                                                         |                                                                                          |
|----|---------|---------------------------------------------------------|------------------------------------------------------------------------------------------|
| 37 | AB/0111 | Best care specialist hospital                           | 6, madukwe close off Ahuanya Av. Umungasi, Aba                                           |
| 38 | AB/0112 | Divine grace missionary hospital                        | 49, Azikwe road, Aba                                                                     |
| 39 | AB/0113 | El-Shaddai hospital                                     | 40 AHOADA STREET, UMUAHIA                                                                |
| 40 | AB/0115 | GLORY OF GOD HOSPITAL                                   | OWAZA TOWN, ABIA STATE                                                                   |
| 41 | AB/0116 | GROUP MEDICAL PRACTICE                                  | 1,EMUCHAY CLOSE OFF AZUKA DRIVE, OGBO HILL ABA                                           |
| 42 | AB/0117 | Harvey Clinic                                           | 14, HOWELL'S CRESCENT, ABA                                                               |
| 43 | AB/0118 | MARGARET HOSPITAL                                       | 45 FINBARR'S ROAD, UMUAHIA                                                               |
| 44 | AB/0120 | REGENTS CROSS SPEC. HOSPITAL                            | 106, IKOT EKPENE ROAD, ABA                                                               |
| 45 | AB/0123 | SUNSHINE HOSPITAL                                       | KM1 IKOT EKPENE ROAD, UMUAHIA                                                            |
| 46 | AB/0145 | Michael Okpara University of Agriculture Medical Centre | Umudike,                                                                                 |
| 47 | AB/0149 | J Medi - Care Hospital                                  | 73 Bonny Street Umuahia                                                                  |
| 48 | AB/0150 | Chukwuebuka Hospital                                    | 50 School Road, Umuahia                                                                  |
| 49 | AB/0153 | Ngozi Hospital                                          | 2 Isuochi Close, Umuahia                                                                 |
| 50 | AB/0170 | MC Hospital                                             | 59, Omuma Road, Aba                                                                      |
| 51 | AB/0172 | Uzonde Polyclinic                                       | 8 Ofali Agwu Road Amaekpu Ohafia, Abia State                                             |
| 52 | AB/0173 | Miracle Hospital                                        | 5 Ekpem Street, 200 Obohia Road, Aba, Abia State                                         |
| 53 | AB/0174 | General Hospital Ohafia                                 | Ohafia Abia State                                                                        |
| 54 | AB/0175 | Daughters Of Mary Mother Of Mercy Hospital              | AhiaekeNdume, Umuahia Abia State                                                         |
| 55 | AB/0177 | Blessed Haven Hospital                                  | 50, Omoba Road, Ogbor Hill, Aba, Abia State                                              |
| 56 | AB/0179 | Impact Hospital & Maternity                             | 59B Ukaegbu Road Ogbor Hills, Aba Abia State                                             |
| 57 | AB/0181 | Cottage Hospital Azumiri                                | Azumiri, Abia State                                                                      |
| 58 | AB/0182 | Nigerian Christian Hospital Nlangu                      | Km 18, Aba-Ekot-Ekpene Road Aba Abia State                                               |
| 59 | AB/0184 | Life Essential & Maternity                              | 32, Uyo Street, by Okigwe road, Umuahia                                                  |
| 60 | AB/0185 | Goodness & Mercy Christian Hospital                     | 121, Faulks Road Opp UBA PLC Abia State                                                  |
| 61 | AB/0186 | Police Hospital                                         | Bendel Road Umuahia Abia State                                                           |
| 62 | AB/0187 | Standard Hospital And Maternity                         | 43, Abdulrahma Kanu Street Off 129 Continental Rd ( Former MCC Road) Aba                 |
| 63 | AB/0188 | Shammah Christian Hospital Maternity & Lab              | 4, Ogwo road, Aba Abia State                                                             |
| 64 | AB/0190 | Uzonde Polyclinic                                       | 8 Ofali Agwu Road Amaekpu Ohafia, Abia State                                             |
| 65 | AB/0192 | Shammah Christian Hospital Maternity & Lab              | 4 Ogwo Road Off Ohanku Road, Aba. Abia State.                                            |
| 66 | AB/0193 | Standard Hospital And Maternity                         | 43, Abdulrahman Kanu Street Off 129 Continental Road (Former MCC Road), Aba. Abia State. |

|     |         |                                          |                                                                                                    |
|-----|---------|------------------------------------------|----------------------------------------------------------------------------------------------------|
| 67  | AB/0194 | Madonna Catholic Hospital                | Ohokobe Afaraukwu Aba Road, Umuahia. Abia State                                                    |
| 68  | AB/0197 | Pink Rose Hospital                       | 4 Enyiukwu Road Extension/172 Aba Road (Stanpol Junction) Umuahia Abia State                       |
| 69  | AB/0199 | Nissi Foundation Hospital & Maternity    | 56 Omuoba Road, Ogbor Hill, Aba Abia State                                                         |
| 70  | AB/0200 | Amara Jane Hospital & Maternity          | Umuana Gate 2, The Ndume, Umuahia Abia State                                                       |
| 71  | AB/0201 | Dominion Hospital & Maternity            | 9A Sunny Lane, off Azuka Drive, Ogbor Hill, Aba Abia State                                         |
| 72  | AB/0202 | Christ De King Health Services Ltd       | 9 Ori Ngodo, Isuochi. Abia State                                                                   |
| 73  | AB/0203 | Calif Specialist Hospital                | 25/27 Chief Adiukwu Street, By Dip Gold Filling Station, Off Enugu –PH Express Way, Aba Abia State |
| 74  | AB/0204 | 143 Battalion MRS                        | Ovim Barracks, Ovim Abia State                                                                     |
| 75  | AB/0211 | Embassy Specialist & maternity Care Ltd. | No. 59c Ayaba Umueze Road, Opp. ABSUTH, second gate, Aba.                                          |
| 76  | AB/0213 | All Saints Hospital                      | No. 26 Item street Umuahia.                                                                        |
| 77  | AB/0214 | St. Anthony Hospital Ltd.                | No. 52-80 Etche Road, Aba.                                                                         |
| 78  | AB/0216 | Emschel Clinics and Maternity            | No. 2 Scotland crescent, Aba.                                                                      |
| 79  | AD/0002 | General Hospital, Ganye                  | Ganye, Adamawa State                                                                               |
| 80  | AD/0006 | Cottage Hospital, Mayo-Belwa             | Mayo-Belwa                                                                                         |
| 81  | AD/0011 | Beekay Clinic & Maternity                | Maiha Road, Mubi                                                                                   |
| 82  | AD/0013 | General Hospital, Numan                  | Numan                                                                                              |
| 83  | AD/0015 | Cottage Hospital, Song                   | Song                                                                                               |
| 84  | AD/0017 | Specialist Hospital, Yola                | Yola                                                                                               |
| 85  | AD/0018 | Barka Clinic & Maternity                 | Uba Town                                                                                           |
| 86  | AD/0019 | Triumph Medical Clinic                   | Mubi Road, Jimeta                                                                                  |
| 87  | AD/0020 | Matco Clinic                             | Army Barracks Road, Malamre, Yola                                                                  |
| 88  | AD/0021 | Galbose Clinic                           | Mubi Road, Yola                                                                                    |
| 89  | AD/0022 | Mahmud Clinic                            | Jimeta, Yola                                                                                       |
| 90  | AD/0023 | Dawau Clinic Ltd.                        | Jimeta Yola                                                                                        |
| 91  | AD/0024 | Peace Hospital                           | No. 2 Luggere Street, Beside St. Theresa's Cathedral, Yola, Adamawa State                          |
| 92  | AD/0025 | Adamawa Hospital                         | Abuja Road, Yola Town                                                                              |
| 93  | AD/0027 | Sauki Medical Clinic                     | Bauchi Street, Off Mustapha Moh'D Way, Jimeta, Yola                                                |
| 94  | AD/0028 | The Freedom Polyclinic                   | 9b Hospital Road, Jimeta                                                                           |
| 95  | AD/0029 | Galbose Clinic & Maternity               | 22 Atiki Abubakar Way, Jimeta, Yola                                                                |
| 96  | AD/0030 | Jimeta Clinics & Maternity               | Bishop Street, Jimeta, Yola                                                                        |
| 97  | AD/0048 | Federal Medical Centre                   | Yola                                                                                               |
| 98  | AD/0049 | Arhyel Medical Centre                    | Yola Bye-Pass                                                                                      |
| 99  | AD/0050 | Noma Clinic & Maternity                  | Gombi Town                                                                                         |
| 100 | AD/0051 | Arhyel-Royal Hospital                    | Numan Road, Jimeta                                                                                 |
| 101 | AD/0052 | General Hospital, Mubi                   | Mubi                                                                                               |

|     |         |                                                  |                                                          |
|-----|---------|--------------------------------------------------|----------------------------------------------------------|
| 102 | AD/0053 | Newlife Hospital                                 | Sabon Layi, Mubi                                         |
| 103 | AD/0054 | General Hospital, Garkida                        | Garkida                                                  |
| 104 | AD/0055 | Cottage Hospital, Hong                           | Hong                                                     |
| 105 | AD/0056 | Cottage Hospital, Guyuk                          | Guyuk                                                    |
| 106 | AD/0057 | Cottage Hospital, Borrong Demsa                  | Borrong Demsa                                            |
| 107 | AD/0076 | 75 STG Medical Centre                            | NAF Station, Yola                                        |
| 108 | AD/0077 | General Hospital, Michika                        | Michika, Adamawa State                                   |
| 109 | AD/0078 | Cottage Hospital, Fufore                         | Fufore, Adamawa State                                    |
| 110 | AD/0081 | 23 Bde MC Yola                                   | Yola, Adamawa State                                      |
| 111 | AD/0082 | 232 TK Bn MRS, Yola                              | Yola, Adamawa State                                      |
| 112 | AD/0083 | Federal College of Education, College Clinic     | Jimeta, Yola Road, Adamawa State                         |
| 113 | AD/0084 | Federal Polytechnic Clinic, Mubi                 | Barama Ward, Mubi                                        |
| 114 | AD/0085 | MercyLand Clinics & Maternity                    | Mubi Bye-pass Jimeta, Yola                               |
| 115 | AD/0096 | DSS Clinic                                       | Yola, Adamawa State                                      |
| 116 | AD/0097 | Police Clinics, Adamawa                          | Adamawa State                                            |
| 117 | AD/0098 | Federal University of Tech. Medical Centre, Yola | Yola, Adamawa State                                      |
| 118 | AD/0101 | COTTAGE HOSPITAL, GULEK                          | GULEK                                                    |
| 119 | AD/0102 | DEMBELE NURSING & MAT. HOME                      | GAYA, MUBI                                               |
| 120 | AD/0104 | OPTIMUM CLINIC                                   | 100 MOH""""""D MUSTAPHA WAY, JIMETA                      |
| 121 | AD/0105 | UBIS CLINIC                                      | 10 MAIHA RD, MUBI                                        |
| 122 | AD/0116 | Trust Medical Centre                             | Anguwan Faransa, Gombi                                   |
| 123 | AD/0118 | The New Boshang Clinic and maternity Ltd         | Karewa GRA, Jimeta-Yola                                  |
| 124 | AD/0120 | Adamawa State University Health Centre           | Adamawa State University, Mubi                           |
| 125 | AD/0121 | Valli Medical Clinic                             | 22 Mallamre, Opp FCE First Gate, Along Aliyu Way, Jimeta |
| 126 | AD/0124 | Kowa Clinic                                      | Near New Market, Mayo Belwa                              |
| 127 | AD/0125 | Da'ama Specialist Hospital                       | # 70/72 Atiku Abubakar Road, Yola                        |
| 128 | AD/0126 | American University Of Nigeria Clinic.           | Lamido Zubairu Way, Yola By-Pass, Adamawa State.         |
| 129 | AD/0127 | Nigerian Law School Clinic                       | Nigerian Law School, Yola Campus Adamawa                 |
| 130 | AD/0128 | Bamaiyi Hospital And Clinic                      | 123, Atiku Abubakar Road, Jimeta-Yola, Adamawa state     |
| 131 | AD/0129 | Meddy Private Clinic                             | Opposite School Of Nursing Yola, Adamawa State.          |
| 132 | AD/0130 | Graceland Clinic & Maternity                     | 2 City Hotel Road, Numan                                 |
| 133 | AD/0131 | Medical and Health Department,                   | Adamawa State Polytechnic, Yola, Adamawa State           |
| 134 | AD/0132 | Valada Hospital & Maternity                      | Army Barracks Road Yola Adamawa State                    |
| 135 | AK/0001 | Samaritan Clinic                                 | No. 7 Ekong Uko Street, Eket                             |
| 136 | AK/0002 | Immanuel General Hospital                        | Eket, Akwa Ibom                                          |
| 137 | AK/0007 | General Hospital, Ikot Ekpene                    | Ikot Ekpene, Akwa Ibom                                   |
| 138 | AK/0010 | General Hospital, Iquita-Oron                    | Iquita-Oron                                              |
| 139 | AK/0011 | State Staff Clinic                               | Secretariat Complex, Abak Rd., Uyo                       |

|     |         |                                          |                                                                  |
|-----|---------|------------------------------------------|------------------------------------------------------------------|
| 140 | AK/0012 | University Of Uyo Teaching Hospital, Uyo | Uyo, Akwa Ibom                                                   |
| 141 | AK/0013 | Mfon Abasi Medical Centre                | Uyo, Akwa Ibom                                                   |
| 142 | AK/0014 | Uwana Family Hospital                    | Uyo, Akwa Ibom                                                   |
| 143 | AK/0015 | Ibom Clinic/Hospital                     | Uyo, Akwa Ibom                                                   |
| 144 | AK/0016 | Lifecare Hospital                        | Uyo, Akwa Ibom                                                   |
| 145 | AK/0017 | Uwakmfon Specialist Clinics & Hospital   | 27 Nwaniba Road, Uyo, Akwa Ibom State                            |
| 146 | AK/0030 | NAF Medical Centre                       | Air Force Comp Sec. Sch., Uyo                                    |
| 147 | AK/0032 | 6 Bn MRS Abak                            | Abak, A/Ibom State                                               |
| 148 | AK/0033 | Sick bay                                 | FOB Ibaka, Akwa Ibom State                                       |
| 149 | AK/0034 | Mainland Clinic/Hospital                 | 2 Andy-Umana Lane, Off Aka Road, Uyo, Akwa Ibom                  |
| 150 | AK/0035 | Majesty Hospital & Eye Clinics           | 47 Wellington Bassey Akwa Ibom                                   |
| 151 | AK/0037 | Mount Olive Clinic & Maternity           | 8 Ebonyy Essien Street, off Ikot Ekpene Rd, Uyo, A/Ibom State    |
| 152 | AK/0043 | DSS Clinic                               | Uyo, Akwa Ibom State                                             |
| 153 | AK/0044 | Police Clinics, Akwa Ibom                | Akwa Ibom State                                                  |
| 154 | AK/0045 | University of Uyo Health Centre, Uyo     | Uyo, A/Ibom State                                                |
| 155 | AK/0046 | All Saints Medical Centre                | 1-5 Independent Avenue, Abak, Akwa Ibom                          |
| 156 | AK/0047 | Alma clinics                             | 15, Afia street, uyo, Akwa-ibom                                  |
| 157 | AK/0048 | Dammy memorial hospital                  | 34, ukana offot street, uyo, Akwa-ibom                           |
| 158 | AK/0049 | Dan Abia specialist clinic               | 11b, Idoro road, off itam junction, uyo,Akwa-ibom                |
| 159 | AK/0050 | Domingo hospital                         | Plot 9, unit E, Ben Udo Street, Ewet Housing estate, uyo         |
| 160 | AK/0051 | Ekop specialist clinic                   | 181, F Ewet Housing Estate, Uyo                                  |
| 161 | AK/0053 | Gateway hospital                         | 15, okon essien lane, uyo                                        |
| 162 | AK/0054 | Good shepherd hospital                   | 75, eket oron road, Eket                                         |
| 163 | AK/0055 | Iha foundation medical center            | Eket Annex, Ekpeyu street, Ikot ebok Eket                        |
| 164 | AK/0056 | Kaizo specialist hospital                | 10, market road,Afaha offot, off Abak road, Uyo                  |
| 165 | AK/0057 | kUFRE ABASI CLINICS & MAT.               | 31/34, EKPO OBOT STREET, UYO                                     |
| 166 | AK/0058 | Mercy hospital                           | 95 hospital road, Abak, AK/Ibom                                  |
| 167 | AK/0059 | St. Athanasius hospital                  | 1, ufeh street,F.H.estate , Abak road, Uyo                       |
| 168 | AK/0060 | Ubong Abasi specialist clinic            | 5, clement Isong street, FHA estate, Abak road, Uyo              |
| 169 | AK/0062 | Uwem foundation clinic                   | 8b Etienam street, oron, AK/IBOM                                 |
| 170 | AK/0082 | Our Lady of Lourdes Infirmary            | 22 Ekpanya Street Uyo                                            |
| 171 | AK/0083 | Eduwem Clinic                            | Ntan Akpan Udom,Ibiano-Ibom, Akwa Ibom State                     |
| 172 | AK/0084 | Etuknwa Specialist Clinic                | 120,Udo-Umana Street, Uyo Akwa Ibom State                        |
| 173 | AK/0085 | Dunamis Clinic And Maternity             | 25 A,Afia Etid Street, Off Udo Umana Street, Uyo Akwa Ibom State |

|     |         |                                             |                                                            |
|-----|---------|---------------------------------------------|------------------------------------------------------------|
| 174 | AK/0087 | Jeconiah Specialist Hospital                | Off 308,Oron Road, Uyo Akwa Ibom State                     |
| 175 | AK/0088 | Manafen Group Hospital                      | 114,Oron Road, Oron Akwa Ibom State                        |
| 176 | AK/0089 | Our Lady Of Lourdes Infirmary               | 22,Ekpanya Street, Uyo Akwa Ibom State                     |
| 177 | AK/0090 | Petalice Medical Centre LTD                 | No 5/7 Marickson Hospital Way Akwa Ibom State              |
| 178 | AK/0091 | Police Clinic Ikot Ekpene                   | Ikot Ekpene Akwa Ibom State                                |
| 179 | AK/0092 | Premier Medical Services                    | 3,High Tension Line,Edet Akpan Avenue, Uyo Akwa Ibom State |
| 180 | AK/0093 | Queen Esther Specialist Hospital            | Ediye Samuel Street,Itiam Etoi, Uyo Akwa Ibom State        |
| 181 | AK/0094 | Sifon Clinic                                | No 1,Uteng Lane, Uyo Akwa Ibom State                       |
| 182 | AK/0095 | St. Lukes Hospital                          | Anua P.M.B. 3, Uyo, Akwa Ibom State                        |
| 183 | AK/0096 | St. Patrick's Clinic &Maternity             | 15,Nsie Street Off Eyetong Road, Oron Akwa Ibom State      |
| 184 | AK/0097 | Staphender Specialist klinik                | 3,Ibokette Street Off Aka Road, Uyo Akwa Ibom State        |
| 185 | AK/0099 | Nissi Specialist Hospital                   | Plot 42,Line H, Ewet Housing Estate, Uyo Akwa Ibom State   |
| 186 | AK/0105 | Dyme Hospital & Maternity Ltd               | 10,Edem Urua Street, Uyo, Akwa-Ibom State                  |
| 187 | AK/0106 | Trio Medical Centre & Maternity Ltd         | Plot 1,Unit M, Ewet Housing Estate, Uyo                    |
| 188 | AK/0107 | Coray Specialist Clinic & Maternity         | 8, Ibiam street, Uyo. Akwa Ibom state                      |
| 189 | AK/0109 | RecoveryHill Nig. Ltd.                      | 3, Idim Edoho Street, Iko Ekwa, Eket, Akwa Ibom State.     |
| 190 | AK/0110 | The Bridge Clinic Ltd                       | 111B, Umuahia Road, Ikot Ekpene. Akwa Ibom state.          |
| 191 | AK/0114 | Cozar Specialist Hospital Ltd               | 45, Afia Nsit Road, Eket, Akwa Ibom State.                 |
| 192 | AK/0115 | San Dominique Hospital                      | Plot 1, Unit M, Ewet Housing Estate,Uyo. Akwa Ibom state.  |
| 193 | AN/0002 | General Hospital, Awka                      | Awka, Anambra State                                        |
| 194 | AN/0003 | Harmony Hospital                            | No. 5 Oraogbu Street, Awka, Anambra State.                 |
| 195 | AN/0004 | Beacon Hospital                             | 12. Umudora Street, Awka, Anambra State.                   |
| 196 | AN/0005 | Divine Hospital & Maternity                 | 9 Ken Okoli Street, Off Works Road, Awka, Anambra State.   |
| 197 | AN/0006 | Silgrey Royal Hospital & Maternity          | Ikegwuonu Close, Opp. Mission Rd. Awka, Anambra State.     |
| 198 | AN/0008 | Nnamdi Azikiwe University Teaching Hospital | Nnewi, Anambra State                                       |
| 199 | AN/0012 | General Hospital Onitsha                    | Hospital Road, Onitsha, Anambra State.                     |

|     |         |                                                |                                                            |
|-----|---------|------------------------------------------------|------------------------------------------------------------|
| 200 | AN/0015 | Menax Hospital                                 | Onowu Anatogu, St. Woliwo Layout Onitsha,                  |
| 201 | AN/0016 | Rush Green Maternity Hosp. & Clinic            | 64, Ugwunobamkpa Road, Near Isokwe Police Post, Onitsha.   |
| 202 | AN/0017 | New Hope Medical Centre                        | 80, Modebe Avenue, Odoakpu, Onitsha, Anambra State.        |
| 203 | AN/0018 | Venik Special Hospital                         | No. 1 Olo Street, Omagba Layout Onitsha, Anambra State.    |
| 204 | AN/0022 | St. Lukes Hospital                             | 7 Onwudiwe Street Onitsha, Anambra State.                  |
| 205 | AN/0027 | Mezie Hospital & Maternity                     | 103b Upper New Market, Onitsha, Anambra                    |
| 206 | AN/0028 | Intensive Care Hospital                        | 36, Oguta Road, Onitsha, Anambra State.                    |
| 207 | AN/0029 | Ace Specialist Hospital                        | 73b Limca Road/1umuoji Street Onitsha, Anambra State.      |
| 208 | AN/0030 | Obiwanne Hospital & Maternity                  | 102 Limka Road, Nkpor Anambra State.                       |
| 209 | AN/0031 | St. Annes Hospital & Maternity                 | 7, Enugu Road, Nkpor, Anambra State.                       |
| 210 | AN/0032 | Abazie Hospital(Formerly Head Bridge Hospital) | 2 Abazie Lane, Off Our Lady's Road Nkpor, Anambra State.   |
| 211 | AN/0033 | The Children's Hospital                        | 11 Uli Street, Nnewinchi, Nnewi, Anambra State             |
| 212 | AN/0082 | 302 FAR MRS Onitsha                            | Onitsha, Anambra State                                     |
| 213 | AN/0083 | 14 FER MRS Onitsha                             | Onitsha, Anambra State                                     |
| 214 | AN/0084 | Cottage Hospital/Comprehensive Health Centre   | Anambra State Police Command, Anambra State                |
| 215 | AN/0085 | Christ the King Hospital                       | Off Nkwura Street, Awka, Anambra State                     |
| 216 | AN/0086 | Holy Rosary Specialist Hospital                | Waterside, Along Bank of the Niger, Onitsha, Anambra State |
| 217 | AN/0087 | Ifebi Medical Centre                           | 16A, Igwebuikwe School Road, Awka, Anambra State           |
| 218 | AN/0088 | Beluchukwu Memorial Hospital                   | Nkwo, Enugu-Ukwu, Anambra State                            |
| 219 | AN/0089 | Chukwunonso Hospital & Maternity               | Nanka, Orumba, Anambra State.                              |
| 220 | AN/0090 | Chukwunonso Hospital & Maternity               | Oko, Ekwulobin                                             |
| 221 | AN/0091 | St. Charles Borromeo Hospital                  | Off Limca Road, Onitsha, Anambra State                     |
| 222 | AN/0092 | St. Augustines Hospital & Maternity            | Oko, Ekwulobia, Anambra State                              |
| 223 | AN/0095 | Ugochukwu Hospital & Maternity                 | No. 3 Obinna Street, Nkpor, Anambra State                  |
| 224 | AN/0096 | Chimaobi Hospital & Maternity                  | No. 6 Agba Str., Nnewichi, Nnewi, Anambra State            |
| 225 | AN/0097 | The Light Specialist Hospital                  | No. 40, Eme Court Rd., Umudim, Nnewi, Anambra State        |
| 226 | AN/0098 | Life Specialist Hospital                       | No. 7 Ikemba Drive, Umudim, Nnewi, Anambra State           |

|     |         |                                             |                                                       |
|-----|---------|---------------------------------------------|-------------------------------------------------------|
| 227 | AN/0099 | Chimex Specialist Hospital                  | No. 87 Ezemewi Road, Nnewichi, Nnewi, Anambra State   |
| 228 | AN/0100 | King David Hospital                         | Agulu, Anambra State                                  |
| 229 | AN/0123 | Sefton Specialist Medical Centre            | 5, Onubuya Street, off Court Road, Akwa               |
| 230 | AN/0124 | Federal College of Education (Technical)    | Umunze, Anambra State                                 |
| 231 | AN/0127 | DSS Clinic                                  | Awka, Anambra State                                   |
| 232 | AN/0128 | Federal Polytechnic Med. Centre, Okoh       | Okoh, Enugu State                                     |
| 233 | AN/0129 | St. Catherines Hospital & Maternity         | Umumze, Anambra State                                 |
| 234 | AN/0131 | AWKA MEDICAL CENTER                         | HOUSE3,ROAD4,UDOKA HOUSING ESTATE,ANAMBRA STATE       |
| 235 | AN/0132 | CHIBUZOR HOSPITAL AND MAT.                  | 34,ORLU ROAD, EKWULOBIA,ANAMBRA                       |
| 236 | AN/0133 | CROWN HOSPITAL                              | UMUOJI ROAD,MKPOR, ANAMBRA STATE                      |
| 237 | AN/0134 | DELTA HOSPITAL AND MAT.                     | 21 ZIK AVENUE, FEGGE, ONITSHA                         |
| 238 | AN/0135 | Dionye Memorial Hospital                    | OKPO VILLAGE,EKWULOBIA, ANAMBRA                       |
| 239 | AN/0136 | GOD'S ESTATE SPEC. HOSPITAL                 | 36, MOORE STREET, ODOAKPU                             |
| 240 | AN/0137 | GOZIE SPECIALIST HOSPITAL                   | 10A NEW CEMETARY ROAD, ONITSHA                        |
| 241 | AN/0138 | IMMACULATE HEART HOSPITAL AND MAT.          | OLD ENUGU-ONITSHA                                     |
| 242 | AN/0140 | Nnamdi Azikwe University Medical Centre     | AWKA                                                  |
| 243 | AN/0142 | PARAGON HOSPITAL AND MAT.                   | 7, BISHOP SHANAHAM STREET, FEGGE, ONITSHA             |
| 244 | AN/0144 | TRINITY HOSPITAL                            | 50 AMIKWO ROAD, AWKA                                  |
| 245 | AN/0171 | Apex Medical Centre                         | Igbo-Ukwu                                             |
| 246 | AN/0173 | Pioneer Int. Spec Hospital                  | Plot 193 Owele Ebo Estate, Onitsha                    |
| 247 | AN/0175 | R N Afunogo Memorial Hospital               | 4B St Faith Road, Awka                                |
| 248 | AN/0177 | Chidera Hospital                            | 12 Metun Road Umuanuka, Otolo Nnewi                   |
| 249 | AN/0178 | Urban Hospital & Maternity                  | Enugu/Onitsha Express Way                             |
| 250 | AN/0184 | St Catherine Hospital & Maternity           | Umunze Orumba                                         |
| 251 | AN/0188 | Divine Care Specialist Hospital & Maternity | 77 Igwe Orizu Road, Otolo Nnewi                       |
| 252 | AN/0191 | Bex Memorial Hospital                       | Km 1 Owerri Road, Onitsha                             |
| 253 | AN/0193 | Iyieniu Hospital                            | Iyieniu Hospital Road, Ogidi                          |
| 254 | AN/0195 | St Victoria Specialist Hospital & Maternity | 61 Orlu Ekwulobia                                     |
| 255 | AN/0198 | Crest Specialist Clinic                     | 20 Enweana Street B/D Cat Kwata, Awka                 |
| 256 | AN/0202 | Infant Jesus Hospital & Children Clinic     | 1 Emenike Crescent, Oremohu Street, Awada             |
| 257 | AN/0203 | Bethsaida Specialist Hospital               | Plot CL6, Pond Street Housing Estate, Feggae, Onitsha |
| 258 | AN/0205 | Ogechukwu Hospital                          | 26 Orlu Road, Ekwulobia                               |
| 259 | AN/0206 | First Hospital & Maternity                  | Near St Michael Church, Nawfia                        |
| 260 | AN/0213 | Chidera Specialist Hospital                 | Nkwo Uga, Uga                                         |
| 261 | AN/0214 | Our Lady Of Lourdes Hospital                | Ihiala, Anambra State                                 |
| 262 | AN/0215 | St. Mary's Hospital & Maternity             | Agba Village, Ekwulobia, Anambra State.               |



|     |         |                                                |                                                                                  |
|-----|---------|------------------------------------------------|----------------------------------------------------------------------------------|
| 263 | AN/0216 | His Glory Hospital & Maternity                 | 96 Arthur Eze Avenue, near Tracy Hotel, Awka                                     |
| 264 | AN/0217 | Kanayo Specialist Hospital & Maternity         | 17 Enugu Road, Onitsha                                                           |
| 265 | AN/0219 | Messiah Foundation Hospital                    | 20 Awka Road, Ekwulobia                                                          |
| 266 | AN/0221 | Mata Christi Hospital                          | 73 Limka Road Nkpor                                                              |
| 267 | AN/0224 | Obioma Specialist Hospital & maternity         | 19 Onwukwe Street Abunor Nnewichi, Nnewi Anambra State                           |
| 268 | AN/0225 | St. Helen`s Specialist Hospital                | Agbou Estate Behind Kenneth Dike Sec Sch Off Obinagu, Amawbia Awka Anambra State |
| 269 | AN/0226 | Toronto Hospital limited                       | 2, Upper Niger Bridge Onitsha Anambra State                                      |
| 270 | AN/0227 | Izunna Hospital And Maternity LTD.             | Ezinalo Village Ifite Awka, Awka South Anambra State                             |
| 271 | AN/0228 | Harmony Specialist Hospital & Maternity        | 5 Orogbu Awka Anambra State                                                      |
| 272 | AN/0229 | Dayspring Cottage Hospital                     | Little-Wood Estate Umuota, Obosi Anambra State                                   |
| 273 | AN/0232 | All Saints Hospital & Maternity                | Agulu (Nkitaku Village) Anambra State                                            |
| 274 | AN/0233 | Chukwunonso Hospital & Maternity               | Nnobi Anambra State                                                              |
| 275 | AN/0234 | Okpala Hospital And Maternity                  | Enugwu-ukwu Near Ezi-Elias Anambra State                                         |
| 276 | AN/0235 | Anambra State University Teaching Hospital     | Awka Amaku Anambra State                                                         |
| 277 | AN/0236 | Rock Foundation Hospital & Maternity           | 5, Igwebuikwe Road Awka Anambra State                                            |
| 278 | AN/0237 | Isaac Chira Memorial Hospital                  | Awkuzu Anambra State                                                             |
| 279 | AN/0238 | Cynvic Specialist Hospital                     | General Hospital Road Agba Ekwulobia Anambra State                               |
| 280 | AN/0239 | Madueke Memorial Hospital And Maternity        | 13, Sunny Dan Street Nkpor Anambra State                                         |
| 281 | AN/0240 | Our Lady Of Lourdes Hospital                   | Ihiala Anambra State                                                             |
| 282 | AN/0241 | Uchenna Hospital & Maternity.                  | 116, Onitsha Old Road Nnewi, Nnewichi-Nnewi Anambra State                        |
| 283 | AN/0242 | Madonna Maternity Hospital                     | No. 2, Emma Nnaemeka Street Awka Anambra State                                   |
| 284 | AN/0243 | Prime Specialist Hospital                      | 5, Nwufo Meniru Street Beside Bishop Crother Seminary, Awka Anambra State        |
| 285 | AN/0244 | Zion Hospital                                  | Opp. General Hospital Enugwu Ukwu Anambra State                                  |
| 286 | AN/0246 | Lumen Christ Specialist Hospital               | 17, Atani Road Km 1 Iyiowa Odekpe Anambra State                                  |
| 287 | AN/0247 | Nnewi Diocesan Hospital                        | Igwe Orizu Road Otolu, Nnewi Anambra State                                       |
| 288 | AN/0248 | First Foundation Hospital & Mat                | Ummunachi Anambra State                                                          |
| 289 | AN/0249 | Bethsaida Specialist Hospital                  | 48b Nnobi Road Opp. Nnewi High School, Nnewi Anambra State                       |
| 290 | AN/0250 | Police Clinic/IGP M.D. Abubakar Medical Centre | CPS Onitsha Anambra State                                                        |

|     |         |                                                        |                                                                                         |
|-----|---------|--------------------------------------------------------|-----------------------------------------------------------------------------------------|
| 291 | AN/0253 | Beke Memorial Hospital                                 | 64 F.G Onyiuke Avenue, Nimo<br>Anambra State                                            |
| 292 | AN/0254 | Obioma Hospital                                        | 5/7 Anuka Road Otolo, Nnewi<br>Anambra State.                                           |
| 293 | AN/0255 | Mercy Specialist Hospital And Maternity                | 4A New American Road, Onitcha,<br>Anambra State                                         |
| 294 | AN/0256 | St. Joseph's Hospital                                  | Adazi Nnukwu, Anambra State                                                             |
| 295 | AN/0257 | Regina Caeli Specialist Hospital                       | 17, Regina Caeli Road, Awka Anambra<br>State                                            |
| 296 | AN/0258 | Aguata Diocesan Hospital                               | Umunze, Anambra State                                                                   |
| 297 | AN/0259 | Rice Clinic                                            | Rise- Gopat Building Agulu-Nnobi<br>Road Adazi-Ani, Anambra State                       |
| 298 | AN/0260 | Ezinne Hospital & Children Welfare Centre              | 1A Oboli Lane, DMGS Round About<br>Onisha, Anambra State                                |
| 299 | AN/0261 | Kandudi Specialist Hospital                            | Oye Market, Achina Anambra State                                                        |
| 300 | AN/0263 | Dike Medical Centre                                    | Ebenebe Anambra State                                                                   |
| 301 | AN/0264 | Kwenas Clinic & Maternity                              | Afor Ufuma Anambra State                                                                |
| 302 | AN/0265 | Nwanja Allied Hospital                                 | No 1 Modebe Avenue, Odoakpu<br>Onitsha, Anambra State                                   |
| 303 | AN/0267 | Edozie Hospital & Maternity                            | 5, Omanukwue Crescent, Obieze<br>Village, Ifite Duru, Anambra State                     |
| 304 | AN/0268 | Objackson Hospital                                     | No 2 Madonna University Road, Okija,<br>Anambra State                                   |
| 305 | AN/0269 | All Hallow Hospital & Maternity                        | 24B Court Road, Onisha Anambra<br>State                                                 |
| 306 | AN/0273 | Assumpta Clinic & Maternity                            | Charles Modozie Street, off<br>Commissioners Quarters Road, Ifite<br>Awka Anambra State |
| 307 | AN/0274 | Aguata Diocesan Hospital Igboukwu                      | Divine Grace Villa 2 Rd 3 Abuja Estate<br>Awka, Anambra State                           |
| 308 | AN/0275 | Madonna Specialist Hospital Nig. Ltd                   | Divine Grace Villa 2 Rd 3 Abuja Estate<br>Awka, Anambra State                           |
| 309 | BA/0001 | Peoples Clinic Ltd.                                    | Aminu Street Bauchi, Bauchi                                                             |
| 310 | BA/0002 | Mai Jama'A Clinic                                      | Wunti Street, Bauchi                                                                    |
| 311 | BA/0003 | Under Five (5) Health Care                             | Jahun Road, Bauchi                                                                      |
| 312 | BA/0004 | Urban Mat. & Child Welfare Clinic                      | Kofan Ran Bauchi, Bauchi                                                                |
| 313 | BA/0005 | Reemee Medicare Nigeria Limited                        | 6, Rimi Road, Gra Bauchi                                                                |
| 314 | BA/0006 | Abubakar Tafawa Balewa University Teaching<br>Hospital | Bauchi, Bauchi State                                                                    |
| 315 | BA/0018 | Shifa'A Medical Clinic                                 | Sule Katagum Road, Azare                                                                |
| 316 | BA/0020 | Mainiima Consultant Clinic - Azare                     | Abdulkadir Street Azare, Bauchi State                                                   |
| 317 | BA/0023 | Niima Consultant Hospital - Bauchi                     | Niima Close, Off Airport Rd. Bauchi                                                     |
| 318 | BA/0024 | DSS Clinic                                             | Bauchi, Bauchi State                                                                    |
| 319 | BA/0025 | Federal Medical Centre - Azare                         | P.M.B. 005, Azare, Bauchi State.                                                        |
| 320 | BA/0026 | Bauchi State Specialist Hospital                       | Nassarawa Jahun Road, Bauchi                                                            |
| 321 | BA/0027 | 33 AB MRS Bauchi                                       | Bauchi, Bauchi State                                                                    |

|     |         |                                               |                                                        |
|-----|---------|-----------------------------------------------|--------------------------------------------------------|
| 322 | BA/0028 | 211 TK Bn MRS, Bauchi                         | Bauchi, Bauchi State                                   |
| 323 | BA/0029 | 301 SPAR GS Bauchi                            | Bauchi State                                           |
| 324 | BA/0030 | ACCS MIR Bauchi                               | Bauchi, Bauchi State                                   |
| 325 | BA/0032 | Bauchi State Police Clinic                    | Bauchi, Bauchi State                                   |
| 326 | BA/0033 | Abubakar Tafawa Balewa Health Centre          | Bauchi, Bauchi State                                   |
| 327 | BA/0035 | RAILWAY HOSPITAL, BAUCHI                      | RAILWAY COMPOUND                                       |
| 328 | BA/0036 | PAHLYCON CLINICS                              | SABUWAN KASUWA RAILWAY ROAD, BAUCHI                    |
| 329 | BA/0037 | Federal Polytechnic medical center, bauchi    | BAUCHI                                                 |
| 330 | BA/0040 | GENERAL HOSPITAL NINGI                        | NINGI- BAUCHI STATE                                    |
| 331 | BA/0041 | GENERAL HOSPITAL MISAU                        | MISAU- BAUCHI STATE                                    |
| 332 | BA/0042 | GENERAL HOSPITAL SHIRA                        | SHIRA - BAUCHI STATE                                   |
| 333 | BA/0043 | GENERAL HOSPITAL TORO                         | TORO - BAUCHI STATE                                    |
| 334 | BA/0044 | GENERAL HOSPITAL TAFAWA BALEWA                | TAFAWA BALEWA - BAUCHI STATE                           |
| 335 | BA/0045 | GENERAL HOSPITAL KATAGUM                      | KATAGUM - BAUCHI STATE                                 |
| 336 | BA/0046 | GENERAL HOSPITAL DARAZO                       | DARAZO - BAUCHI STATE                                  |
| 337 | BA/0047 | GENERAL HOSPITAL DASS                         | DASS - BAUCHI STATE                                    |
| 338 | BA/0048 | GENERAL HOSPITAL JAMA'ARE                     | JAMA''ARE - BAUCHI STATE                               |
| 339 | BA/0049 | GENERAL HOSPITAL GAMAWA                       | GAMAWA - BAUCHI STATE                                  |
| 340 | BA/0050 | GENERAL HOSPITAL ALKALERI                     | ALKALERI - BAUCHI STATE                                |
| 341 | BA/0051 | GENERAL HOSPITAL ITAS                         | ITAS - BAUCHI STATE                                    |
| 342 | BA/0053 | General Hospital Bayara                       | Bauchi                                                 |
| 343 | BA/0054 | Model Primary Health Centre, Yelwan Duguri    | Yelwan Duguri                                          |
| 344 | BA/0055 | Ibrahim Bako Primary Health Centre            | Ibrahim Bako Road                                      |
| 345 | BA/0056 | Family Planning Clinic, Kofar Wase            | Kofar Wase                                             |
| 346 | BA/0057 | Model Primary Health Centre, Nasaru Village   | Nasaru Village                                         |
| 347 | BA/0058 | Model Primary Health Centre, Tsangaya Village | Tsangaya Village                                       |
| 348 | BA/0059 | Model Primary Health Centre, Ganjuwa          | Mia Village Ganjuwa                                    |
| 349 | BA/0060 | Model Primary Health Centre, Dambam           | Jalam Village, Dambam                                  |
| 350 | BA/0061 | Model Primary Health Centre, Yayu             | Yayu Village                                           |
| 351 | BA/0062 | Model Primary Health Centre, Zaki             | Murmur Village                                         |
| 352 | BA/0063 | Model Primary Health Centre, Giade            | Zabi Village, Giade                                    |
| 353 | BA/0064 | Model Primary Health Centre, Shira            | Faggo Village                                          |
| 354 | BA/0065 | Urban Maternity, Azare                        | Azare Village Katagum                                  |
| 355 | BA/0066 | Yahaya Clinic, Jama'are                       | Federal Low Cost, Talba Road, Jama''''''are            |
| 356 | BA/0067 | Alwadata Consultant Clinic                    | 7 KWANI CLOSE FADAMI CLOSE MADA BAUCHI                 |
| 357 | BA/0069 | Abubakar Tafari Polytechnic Medical Centre    | Office of The Registrar, Wuntin Dada, Jos Road, Bauchi |
| 358 | BA/0070 | General Hospital, Kafi Madaki                 | Kafi Madaki                                            |
| 359 | BA/0071 | General Hospital, Burra                       | Burra                                                  |
| 360 | BA/0072 | General Hospital, Boto                        | Boto                                                   |
| 361 | BA/0076 | Gama Clinics                                  | Daba Makaho Street, Azare                              |
| 362 | BA/0083 | Albishir Clinic & Maternity                   | 2 Bununu Road, Behind Police Outpost, GRA Bauchi       |
| 363 | BA/0084 | Medical Centre College of Education           | College of Education, Azare                            |

|     |         |                                              |                                                                        |
|-----|---------|----------------------------------------------|------------------------------------------------------------------------|
| 364 | BA/0086 | Shifa Royal Hospital                         | Bauchi, Bauchi State                                                   |
| 365 | BA/0087 | Ardo Standard Medicare Hospital              | NO 42, S/Abdulkadir Street Azare, Katagum LGA, Bauchi State            |
| 366 | BA/0088 | Al-Ameen Hospital LTD                        | 2, Nassarawa Jahun , Bauchi, Bauchi State.                             |
| 367 | BA/0089 | Wadhum & Wayo Memorial Clinic &Maternity     | 144, Ungwan Taskani, Yelwa Tudun Bauchi, Bauchi State.                 |
| 368 | BA/0090 | Apple Clinic And Maternity                   | No 3, Lame Close, off Sunday Awoniyi St, New GRA, Bauchi, Bauchi State |
| 369 | BA/0092 | National Fistula Clinic                      | Ningi, Bauchi State.                                                   |
| 370 | BN/0003 | TBT Hospital                                 | 91, Cape Doanes Way, Gboko                                             |
| 371 | BN/0004 | Myom Hospital                                | General Hospital Road, Gboko                                           |
| 372 | BN/0007 | Baki Hospital                                | Opp. Base Garden GRA, Gboko                                            |
| 373 | BN/0012 | Federal Medical Centre - Makurdi             | Makurdi, Benue State                                                   |
| 374 | BN/0015 | Madonna Health Service Ltd.                  | (Madonna Hospital) New Bridge Road, Behind Union Bank Mkd              |
| 375 | BN/0016 | Jolua Clinic & Maternity                     | No.9 Maccathy Close, Makurdi                                           |
| 376 | BN/0017 | Lobi Hospital                                | High Level, Makurdi                                                    |
| 377 | BN/0018 | Bishop Murray Medical Centre                 | Close To St. Theresa Church, High Level Makurdi                        |
| 378 | BN/0019 | Sandra Hospital                              | 24, J.S. Tarka Road, Opp. Maltino Filling Station, Makurdi             |
| 379 | BN/0020 | Immaculate Conception Hospital               | Walla Mayo, High Level, Makurdi                                        |
| 380 | BN/0021 | Judita Hospital                              | No.4, Gondo Road, Makurdi                                              |
| 381 | BN/0023 | Family Practice Hospital                     | 4, Landar Close Ankpa Quarters, North Bank, Makurdi                    |
| 382 | BN/0024 | Homa Hospital                                | Hudco Quarters, High Level , Makurdi                                   |
| 383 | BN/0025 | Hemko Hospital                               | Kanshio, Makurdi                                                       |
| 384 | BN/0026 | El-Shaddai Specialist Hospital               | Plot 2319, Kanshio Makurdi                                             |
| 385 | BN/0028 | Pampas Hospital & Maternity                  | 27, Iyorchia Ayu Road, Wurukum Makurdi                                 |
| 386 | BN/0029 | Queen's Clinic                               | 16, Railway Close, High Level Makurdi                                  |
| 387 | BN/0030 | Grace Cottage Hospital                       | 7, David Mark Bye Pass, Makurdi                                        |
| 388 | BN/0052 | St. Daniel's Hospital                        | Behind Elipi Motor Park, Otukpo                                        |
| 389 | BN/0053 | Abo Clinic & Maternity                       | Along Enugu Expressway, Otukpa Branch, Otukpa                          |
| 390 | BN/0054 | Salem Hospital                               | G.S.S Road, Otukpo                                                     |
| 391 | BN/0059 | 45 Nigerian Airforce Hospital                | Air Force Base, Makurdi, Benue State                                   |
| 392 | BN/0060 | Federal Staff Clinic                         | Federal Secretariat, Makurdi, Benue State                              |
| 393 | BN/0061 | 72 Para Bn MRS Makurdi                       | Makurdi, Benue State                                                   |
| 394 | BN/0063 | NASME MIR Makurdi                            | Makurdi, Benue State                                                   |
| 395 | BN/0064 | Cottage Hospital/Comprehensive Health Centre | Benue State Police Command, Makurdi, Benue State                       |
| 396 | BN/0065 | Benonil Hospital                             | 7, Zion Str Wurukum Makurdi                                            |
| 397 | BN/0066 | Benue Women Clinic                           | 35, Modern Market Rd Makurdi                                           |

|     |         |                                                    |                                                                                 |
|-----|---------|----------------------------------------------------|---------------------------------------------------------------------------------|
| 398 | BN/0067 | Kings Cross Clinic                                 | 20, Badagry Str High Level Makurdi                                              |
| 399 | BN/0068 | Rahama Clinic & Maternity                          | 12, Brewery Qtrs Opp Benue State University Medical School Gboko Rd Makurdi     |
| 400 | BN/0069 | Multicare Hospital                                 | Ogbaji Jonah Str Behind LG Commission Makurdi                                   |
| 401 | BN/0080 | University of Agriculture, Makurdi                 | Makurdi, Benue State                                                            |
| 402 | BN/0084 | DSS Clinic                                         | Makurdi, Benue State                                                            |
| 403 | BN/0091 | winner's hospital                                  | 10, J.S Tarka road, Makurdi                                                     |
| 404 | BN/0096 | OTABO HOSPITAL                                     | Effoyo Edumoga, Benue state                                                     |
| 405 | BN/0097 | New Era clinic                                     | 11, Agbo street, Sabon Gari, Oturkpo                                            |
| 406 | BN/0098 | Mount Zion Gate Hospital Ltd                       | 38, Ijami Road, Otukpo                                                          |
| 407 | BN/0109 | Clinic of Divine Love                              | 33 Old Oturkpo Road, Makurdi                                                    |
| 408 | BN/0111 | Ihotu Clinic & Maternity                           | 63 Upo Road Oturkpo                                                             |
| 409 | BN/0114 | St Mary's Hospital                                 | Ichama Road, Okpoga                                                             |
| 410 | BN/0116 | Alpha Hospital & Maternity                         | Efoga-Edumoga, Along Old Oturkpo Road                                           |
| 411 | BN/0122 | Powaren Hospital                                   | 9, J.S. Tarka way, Gboko, Benue state                                           |
| 412 | BN/0123 | Lord is Saviour Clinic & Maternity                 | 34B, Mkar Road, Gboko town, Benue State.                                        |
| 413 | BN/0125 | Healing Hand Specialist Hospital                   | 71, Adikpo Street, Makurdi, Benue State.                                        |
| 414 | BN/0126 | Nation's Hospital & Eye Clinic                     | Ankpa Qtrs Extension, Behind BEM hotel, Makurdi, Benue State.                   |
| 415 | BN/0128 | Hope Hospital                                      | 2, Akure Street, Wadata, Makurdi                                                |
| 416 | BN/0129 | Kings Park Polyclinic                              | Karanga Akanya Street, Off Abu King Shuluwa Road                                |
| 417 | BN/0130 | Pishon Women Specialist Clinic                     | 12, Silas Ebute Street, Off Modern Market Road, Makurdi, Benue State.           |
| 418 | BN/0131 | Delight Specialist Clinic & Maternity              | No 3, Gilga Street, Beside Benue Investment Building, Otukpo Road, Benue State. |
| 419 | BN/0133 | Dora Specialist Hospital                           | Off High Court Road, North Bank, Makurdi, Benue State.                          |
| 420 | BN/0134 | Benue State University Health Services Directorate | Benue State University, Makurdi, Benue State.                                   |
| 421 | BN/0136 | St. Monica's Hospital                              | Opp. St. Anne's Church, Off Adikpo-Vandeikya Road Adikpo Benue State            |
| 422 | BN/0137 | NKST Hospital                                      | Mkar- Gboko, Benue State.                                                       |
| 423 | BN/0139 | Gracely Hospital And Medical Services.             | NO. 5 Adzaage Hinden Street, Behind Fed. Pay office Makurdi Benue State         |
| 424 | BN/0141 | Adoose Specialist Hospital                         | No. 12 Keghem Malu Street New GRA Makurdi Benue State.                          |

|     |         |                                                     |                                                                                                    |
|-----|---------|-----------------------------------------------------|----------------------------------------------------------------------------------------------------|
| 425 | BN/0142 | Ushakaa Hospital                                    | Behind Civil Service Commission Old Otukpo Road, Makurdi Benue State                               |
| 426 | BN/0144 | Service Assurance Specialist Hospital (S. A. S. H). | Beside Adonai Service Station Opp. Modern Market Junction, Manor Quaters Makurdi, Benue State.     |
| 427 | BN/0145 | N. K. S. T Health Clinic.                           | Achia, Usambe Ikurau-ya, Kwande, Benue State                                                       |
| 428 | BN/0146 | Otia Hospital.                                      | 1, Kano Street Otukpo, Benue State                                                                 |
| 429 | BN/0147 | Oyare Hospital And Maternity                        | No. 4, Chief Omakpo Avenue Otukpo, Benue State.                                                    |
| 430 | BN/0148 | Adiyama Hospital                                    | 62, SEC Road Oju, Benue State.                                                                     |
| 431 | BN/0150 | Vineyard Health Centre.                             | Km. 16, Makurdi- Aliade Rd. Opp. NNPC Depot, Makurdi, Benue State.                                 |
| 432 | BN/0153 | Amazing Grace Hospital.                             | No. 16 Uke Wende Street High Level, Makurdi Benue State.                                           |
| 433 | BN/0154 | St. Vincent Hospital.                               | Aliade, Benue State                                                                                |
| 434 | BN/0155 | First Fertility Hospital Ltd.                       | Plot BNB 5827, Behind Tile Ankpa Ward Benue State                                                  |
| 435 | BN/0156 | N K S T Hospital, Zaki Biam                         | Off Wukari Road Zaki Biam, Benue State.                                                            |
| 436 | BN/0157 | N K S T Hospital, Mbaakon.                          | N K S T Hospital, Mbaakon                                                                          |
| 437 | BN/0158 | Myom Hospital                                       | No. 28, General Hospital Road Gbako, Benue State                                                   |
| 438 | BN/0159 | Victory Hospital                                    | Off General Hospital Gboko, Benue State.                                                           |
| 439 | BN/0160 | Wurukum Specialist Clinic                           | Lortyom. Beegu Close, Off Abu King Shuluma Rd. Akpehe Near Police & Division Makurdi, Benue State. |
| 440 | BN/0162 | Benue State University Teaching Hospital.           | BSUTH Outreach Station, Benue State                                                                |
| 441 | BN/0163 | Benue State University Teaching Hospital.           | BSUTH Gboko rd. Behind Tile Ankpa Ward Makurdi, Benue State.                                       |
| 442 | BN/0167 | St. Vincent Hospital Aliade                         | Aliade-Otukpo Road Benue State                                                                     |
| 443 | BN/0169 | St. Gregory Hospital Ikpayongo                      | Ikpayongo Benue State                                                                              |
| 444 | BN/0170 | General Hospital North Bank                         | North Bank ,Markudi Benue State                                                                    |
| 445 | BN/0172 | Gilead Dental Services                              | No.6 Kwararafa Quaters Markudi Benue State                                                         |
| 446 | BN/0176 | General Hospital Buruku                             | Buruku Benue State                                                                                 |
| 447 | BN/0178 | General Hospital Naka                               | Along Adoka Road, Naka Benue State                                                                 |
| 448 | BN/0179 | Fr. Mathias Healthcare Unit                         | St. Theresa Catholic Church, Naka, Benue State                                                     |
| 449 | BO/0001 | General Hospital, Askira/Uba                        | Askira Uba, Lassa Town                                                                             |

|     |         |                                              |                                                           |
|-----|---------|----------------------------------------------|-----------------------------------------------------------|
| 450 | BO/0002 | General Hospital, Bama                       | Bama Gulumba Road, Bama Town                              |
| 451 | BO/0003 | General Hospital, Biu                        | Along Yola Road, Biu                                      |
| 452 | BO/0005 | General Hospital, Gwoza                      | Gwoza Town, Maiduguri                                     |
| 453 | BO/0007 | University Of Maiduguri Teaching Hospital    | Along Bama Rd., Maiduguri                                 |
| 454 | BO/0009 | General Hospital, Kukawa                     | Along Kukawa-Damasak Road, Kukawa                         |
| 455 | BO/0011 | Taimakon Jama'A Clinic & Mat.                | Maiduguri, Borno                                          |
| 456 | BO/0012 | Borno Medical Clinic                         | No.8, Sir Kashim Ibrahim Way                              |
| 457 | BO/0013 | New Foundation Hospital Limited              | No. 340, Sabon Lamba Street, Galadima Junction, Maiduguri |
| 458 | BO/0014 | State Specialist Hospital                    | Along Shehu Laminu Way                                    |
| 459 | BO/0015 | Nursing Home, Maiduguri                      | Behind Nhis Zonal Office, Off Shehu Laminu Way, Maiduguri |
| 460 | BO/0016 | Ayamsu Memorial Medical Centre               | 17 Bukar Bolori Street, Kumshe Ward Maiduguri             |
| 461 | BO/0017 | Kanem Hospital & Maternity                   | 152, Tafawa Balewa Street, Maiduguri                      |
| 462 | BO/0018 | Nakowa Specialist Hospital                   | Along Govt. House Road, Maiduguri                         |
| 463 | BO/0019 | Zaman Clinic & Annex                         | 326, Waziri Kyari Drive, Gamboru Ward, Maiduguri          |
| 464 | BO/0028 | General Hospital Monguno                     | Along Maiduguri-Baga Expressway, Maiduguri                |
| 465 | BO/0029 | General Hospital, Ngala                      | Ngala                                                     |
| 466 | BO/0030 | Federal Neuropsychiatry Hospital             | Off, Baga Road, Fed. Low Cost, Maiduguri                  |
| 467 | BO/0047 | DSS Clinic                                   | Maiduguri, Borno State                                    |
| 468 | BO/0048 | 204 WG Medical Centre                        | NAF Station, Maiduguri                                    |
| 469 | BO/0051 | City Medical Centre                          | Galadima Ward, Borno State                                |
| 470 | BO/0053 | 333 AR MRS Maiduguri                         | Maiduguri, Borno State                                    |
| 471 | BO/0054 | 21 Bde MC Maiduguri                          | Maiduguri, Borno State                                    |
| 472 | BO/0055 | 212 Bn MRS, Maiduguri                        | Maiduguri, Borno State                                    |
| 473 | BO/0056 | 331 AR MRS Biu                               | Borno, Borno State                                        |
| 474 | BO/0057 | 202 Bn MRS Bama                              | Bama, Borno State                                         |
| 475 | BO/0058 | 243 Bn MRS Monguno                           | Monguno, Borno State                                      |
| 476 | BO/0059 | 231 TK Bn MRS Biu                            | Biu, Borno State                                          |
| 477 | BO/0060 | Police Hospital Alkome                       | Maiduguri, Borno State                                    |
| 478 | BO/0061 | Cottage Hospital/Comprehensive Health Centre | Police Training School Gwoza, Borno State                 |
| 479 | BO/0062 | Alkome Polyclinic                            | Baga Road, Maiduguri, Borno State                         |
| 480 | BO/0063 | Sunni Hospital                               | Abba Ganaram, Kashim Ibrahim Way, Maiduguri, Borno State  |
| 481 | BO/0065 | Kwatam Medical Clinic                        | Baga Road, Maiduguri, Borno State                         |
| 482 | BO/0066 | Gospel Mission to Nigeria                    | G260 Galdimare, Biu, Gombe State                          |
| 483 | BO/0067 | Hirku Clinic & Maternity                     | Damaturu Road, Biu, Borno State                           |
| 484 | BO/0092 | Abbott Clinic & Maternity                    | Damaturu Road, Biu, Borno State                           |

|     |         |                                                      |                                                               |
|-----|---------|------------------------------------------------------|---------------------------------------------------------------|
| 485 | BO/0093 | University of Maiduguri Staff Clinic                 | Bama Road, Maiduguri, Borno State                             |
| 486 | BO/0095 | Nig Arabic Language Village Hospital                 | Ngalla Borno                                                  |
| 487 | BO/0096 | General Hospital Damboa                              | Damboa, Borno State                                           |
| 488 | BO/0097 | General Hospital Marama                              | Hawul, Borno State                                            |
| 489 | BO/0098 | General Hospital Dikwa                               | Dikwa, Borno State                                            |
| 490 | BO/0099 | General Hospital Kwaya Kusar                         | Kwaya Kusar, Borno State                                      |
| 491 | BO/0100 | General Hospital Shani                               | Shani, Borno State                                            |
| 492 | BO/0101 | General Hospital Konduga                             | Konduga, Borno State                                          |
| 493 | BO/0102 | General Hospital Damasak                             | Damasak, Borno State                                          |
| 494 | BO/0103 | General Hospital Gubio                               | Gubio, Borno State                                            |
| 495 | BO/0104 | General Hospital Nganzi                              | Nganzi, Borno State                                           |
| 496 | BO/0105 | General Hospital Marte                               | Marte, Borno State                                            |
| 497 | BO/0106 | General Hospital Ngoshe                              | Ngoshe, Borno State                                           |
| 498 | BO/0107 | General Hospital Benisheik                           | Benisheik, Borno State                                        |
| 499 | BO/0108 | General Hospital Kirawa                              | Kirawa, Gwoza, Borno State                                    |
| 500 | BO/0109 | General Hospital Magumeri                            | Magumeri, Borno State                                         |
| 501 | BO/0110 | General Hospital Askira                              | Uba Askira, Borno State                                       |
| 502 | BO/0111 | DOMINION MATERNITY HOME                              | OFF NAF BASE, BULUNKUTU                                       |
| 503 | BO/0113 | UNITY CLINICS & MAT.                                 | OLD GRA, NEAR GOVT HOUSE, MAIDUGURI                           |
| 504 | BO/0138 | Police College Clinic                                | Maiduguri                                                     |
| 505 | BO/0140 | Horama Hospital & Maternity                          | Off Lagos Street, Maiduguri                                   |
| 506 | BO/0141 | Police College Clinic                                | Maiduguri, Borno                                              |
| 507 | BO/0142 | Royal Specialist Hospital                            | Opp Gombole Road, Maiduguri                                   |
| 508 | BO/0143 | Amir Medical Clinic                                  | Tashan Damboa Maiduguri                                       |
| 509 | BO/0144 | Mustashfa Specialist Hospital                        | Damboa-Biu Road Behind Indimis House, Maiduguri               |
| 510 | BO/0146 | Heman Hospital & Diagnostic Centre                   | New GRA, Opp, Bama rd motor park, Maiduguri                   |
| 511 | BO/0147 | New Ultra Metroplitan Clinic & Maternity             | 1, Chez Coan Junction, FNPB Rd, Maiduguri                     |
| 512 | BO/0148 | 26 Task Force Brigade Medical Centre                 | Gwoza Borno State                                             |
| 513 | BO/0149 | 7 Division Hospital                                  | Maimalari Military Cantonment, Maiduguri.                     |
| 514 | BO/0150 | Alheri Hospital                                      | Bolori Market Road, Maiduguri                                 |
| 515 | BO/0151 | Umar Shehu Ultramodern Hospital                      | Jos Road, Bulunkutu                                           |
| 516 | BO/0152 | Falala Specialist Medical Clinic                     | Mando Road, Polo GRA, Maiduguri                               |
| 517 | BY/0002 | Asueifa New Life Clinic                              | 9, Asueifa hospital street, Bay bridge, Yenizue-Gene, Yenagoa |
| 518 | BY/0003 | Kuro Specialist Hospital                             | 16, Otiotio road, Yenizue-Gene, Yenagoa                       |
| 519 | BY/0004 | Crest Consultant Hospital and Fertility CenterClinic | Yenagoa                                                       |
| 520 | BY/0006 | Odi General Hospital                                 | Odi                                                           |
| 521 | BY/0007 | St. Peter's Hospital                                 | Amarata, Yenagoa                                              |
| 522 | BY/0008 | Everly Medical Centre                                | Yenegoa Opp. Boat Yard                                        |
| 523 | BY/0009 | Palen Hospital                                       | Ekeki Yenagoa                                                 |



|     |         |                                          |                                                                                   |
|-----|---------|------------------------------------------|-----------------------------------------------------------------------------------|
| 524 | BY/0010 | Mieye Medical Centre                     | 630 Chief Melford Okilo Road, (Before Commisioner's Estate junction Opolo Yenagoa |
| 525 | BY/0011 | Opuere Mat. & Nursing Home               | Commisioners Estate, Opolo, Yenagoa                                               |
| 526 | BY/0012 | Tobis Clinic                             | KM 14, Melford Okilo Road, Akenfa Yenagoa                                         |
| 527 | BY/0013 | New Uchenna Hospital                     | Imgbi Road Amerata Yenagoa                                                        |
| 528 | BY/0016 | Our Saviour's Clinic                     | Kisma                                                                             |
| 529 | BY/0017 | Alfa Clinic                              | Off Imiringi Road, (Before Mechanic Village) Yenagoa                              |
| 530 | BY/0056 | DSS Clinic                               | Yenegoa, Bayelsa State                                                            |
| 531 | BY/0057 | Federal Medical Centre, Yenagoa          | Yenagoa, Bayelsa State                                                            |
| 532 | BY/0058 | Trinidex (Trinity) Medical Centre        | 1 Didie Hotel Road (1st Upstair by the Left) Yenagua                              |
| 533 | BY/0060 | Police Clinics, Bayelsa                  | Bayelsa State                                                                     |
| 534 | BY/0061 | Gloryland-inri med. Center               | 7 DSP Alameseigha Express way by Hospital Junction, Yenagoa                       |
| 535 | BY/0065 | Federal Polytechnic Ekowe Clinic         | Federal Polytechnic, Ekowe                                                        |
| 536 | BY/0066 | Federal University Medical Centre        | Otuoke                                                                            |
| 537 | BY/0067 | Yenogo Hospital & Maternity              | Yenogo, Bayelsa                                                                   |
| 538 | BY/0068 | Kokobo Specialist Clinc                  | Mbiama- Yennagoa Road, Akenfua Bayelsa State.                                     |
| 539 | BY/0069 | New Survivor`s Hospital.                 | New Survivor`s Hospital Road, Igbogene Bayelsa State.                             |
| 540 | BY/0070 | Ripus Hospital LTD                       | No. 35 Otitio Road, Yenagoa Bayelsa State.                                        |
| 541 | CR/0001 | General Hospital, Mary Sclessor Avenue   | Mary Sclessor Avenue, Calabar                                                     |
| 542 | CR/0003 | Hannah Foundation Clinic & Trauma Centre | 13 Akim Close, Housing Estate, Calabar                                            |
| 543 | CR/0004 | Faith Foundation Specialist Clinic       | 57 Ndidem Isang, Isong Road, Calabar                                              |
| 544 | CR/0005 | Peace Medical Centre                     | 17 Efut Street, Calabar                                                           |
| 545 | CR/0006 | City Clinic                              | 101 Ndidem Isang, Isong Road, Calabar                                             |
| 546 | CR/0007 | Bakor Medical Centre                     | 141, Ndidem Isand, Isong Road, Calabar                                            |
| 547 | CR/0008 | Mevon Specialist Clinic                  | 30 Akim Road, Calabar                                                             |
| 548 | CR/0009 | Goldie Clinic                            | 137, Goldie Street, Calabar                                                       |
| 549 | CR/0010 | Efkam Clinic                             | 94 Ndidem Usang Iso Road, Calabar                                                 |
| 550 | CR/0011 | Madonna Specialist Hospital Nig. Ltd.    | Divine Grace Villa, 57, Murray Street, Calabar                                    |
| 551 | CR/0012 | Canaan Medical Centre                    | 20b Iso Oqua, Big Qua Town, Calabar                                               |

|     |         |                                           |                                                     |
|-----|---------|-------------------------------------------|-----------------------------------------------------|
| 552 | CR/0013 | Ideal Medical Centre                      | 30 Mbukpa Road                                      |
| 553 | CR/0014 | Mambo Clinic & Maternity                  | 12 Atamunu Street                                   |
| 554 | CR/0032 | Melrose Hospital                          | 5 Melrose Avenue (Enim Okpa) F/C. Ikom              |
| 555 | CR/0033 | Benson Clinic & Maternity                 | Opp. Motor Park, Four Corners, Ikom                 |
| 556 | CR/0039 | Sacred Heart Catholic Hospital            | Ranch Road, Obudu                                   |
| 557 | CR/0041 | Monaiya Catholic Hospital & Maternity     | Igoli, Ogoja                                        |
| 558 | CR/0042 | General Hospital, Igoli                   | Abakpa Road, Igoli, Ogoja                           |
| 559 | CR/0043 | Santa Maria Clinics                       | 11 Erokoro Street, Abakpa, Ogoja                    |
| 560 | CR/0046 | Danex Medical Centre                      | 5 Danex Road Edenkokol, Ijiman, Ugep                |
| 561 | CR/0048 | Comprehensive Health Centre               | (Poly Clinics) Ooba Okpoma, Yala                    |
| 562 | CR/0049 | Offoboche Specialist Hospital & Maternity | Ijaja Estate, Okuku, Yala                           |
| 563 | CR/0050 | Lutheran Hospital & Maternity             | Abakaliki Road, Yahe, Yala                          |
| 564 | CR/0051 | County Specialist Hospital                | 18 Calabar Road, Ikom                               |
| 565 | CR/0052 | Mount Zion Medical Centre                 | 28b Yellow Duke Street, Calabar                     |
| 566 | CR/0056 | NAF Medical Centre                        | NAF Station, Calabar                                |
| 567 | CR/0058 | University of Calabar Teaching Hospital   | Moore Road, Calabar, Cross River State.             |
| 568 | CR/0061 | 13 Bde MC Calabar                         | Calabar, Cross River State                          |
| 569 | CR/0062 | 146 Bn MRS, Calabar                       | Calabar, Cross River State                          |
| 570 | CR/0063 | 245 Recce Bn MRS, Ikom                    | Ikom, Cross River State                             |
| 571 | CR/0064 | 130 Bn MRS Ogoja                          | Ogoja, Cross River State                            |
| 572 | CR/0065 | 341 AR MRS Ogoja                          | Ogoja, Cross River State                            |
| 573 | CR/0066 | University of Calabar Health Centre       | Calabar, Cross River State                          |
| 574 | CR/0068 | Navy Medical Centre                       | Calabar, Cross River State                          |
| 575 | CR/0069 | Dynasty Medical Centre                    | 73 Ediim-Otop Street, Calabar, Cross River State    |
| 576 | CR/0070 | Nigerian Navy Medical Clinic              | 7, Club Road, Calabar, Cross River State            |
| 577 | CR/0071 | Immanuel Infirmary                        | No. 1 Assemblies of God Rd., Army Junction, Calabar |
| 578 | CR/0072 | Obudu Clinic Ltd                          | 105-108 Ogoja Road, Obudu, Cross River State        |
| 579 | CR/0073 | Peoples Specialist Clinic                 | 48 Akim Road, Calabar                               |
| 580 | CR/0074 | Basseyy Enon Medical Centre               | 11B Yellow Duke Street, Calabar, C/River State      |
| 581 | CR/0075 | Ikpeme Medical Centre                     | 18/20 Ambo Street, Calabar, Cross River State       |

|     |         |                                          |                                                             |
|-----|---------|------------------------------------------|-------------------------------------------------------------|
| 582 | CR/0076 | Victoria Itam Hospital                   | 8A Ediba Lane, Big Qua Town, Calabar, C/River State         |
| 583 | CR/0083 | DSS Clinic                               | Calabar, Cross River State                                  |
| 584 | CR/0084 | Police Clinics, Cross River              | Cross River State                                           |
| 585 | CR/0085 | Police Children School Clinic, Calabar   | Cross River State                                           |
| 586 | CR/0086 | Amazing Grace Specialist Clinic          | 45, Ikot Uduak Street, Off MCC Road, Calabar, C/River State |
| 587 | CR/0087 | Heritage Specialist Clinic               | 64, Ekpo Abasi Street, Calabar, Cross River State           |
| 588 | CR/0088 | Testimony Medical Resource               | 58, Atakpa Street, Calabar, Cross River State               |
| 589 | CR/0089 | Mutanda Medical Centre                   | 9, Edgerley Road, Calabar, Cross River State                |
| 590 | CR/0090 | Pathfinder Clinic                        | 30 Atamunu Street, Calabar, Cross River State               |
| 591 | CR/0091 | St. Joseph Hospital                      | Ikot Ene Ekpabuyo, Cross River State                        |
| 592 | CR/0092 | Comprehensive Health Centre (UCTH Annex) | Okoyong, Calabar, C/River State                             |
| 593 | CR/0093 | General Hospital Akamkpa                 | Akamkpa, C/River State                                      |
| 594 | CR/0094 | General Hospital Ugep                    | Obol Ubi Ujong Avenue, Ugep                                 |
| 595 | CR/0095 | General Hospital Obubra                  | Obubra, C/River State                                       |
| 596 | CR/0096 | Holy Family Catholic Hospital            | Beside Holy Family Parish, Ikom, C/River State              |
| 597 | CR/0097 | Ranch Medical Centre                     | Obudu Cattle Resort, Obanliku, C/River State                |
| 598 | CR/0098 | Eja Memorial Joint Hospital              | Itigidi, Abi LGA, C/River State                             |
| 599 | CR/0099 | Union Medical Centre, Calabar            | 104 Ndidem Island, Isong Road, Calabar, C/River State       |
| 600 | CR/0100 | Cottage Hospital Akpet Central           | Akpet Central, Calabar, C/River State                       |
| 601 | CR/0101 | Ultimate Medical & Consultant            | Plot 328 Unit B Effanga, Mkpa State Housing Estate, Calabar |
| 602 | CR/0123 | Group Specialist Clinic                  | Ndidem Usang Iso Road, Calabar                              |
| 603 | CR/0124 | Mission Hill Clinic & Maternity          | 8, Miles, Calabar                                           |
| 604 | CR/0125 | Ussy Medicals Consulting Room            | no. 3 Baney Ntui Street, Isong Inyang Akampa.               |
| 605 | CR/0126 | First Foundation Clinic                  | Ikom                                                        |
| 606 | CR/0127 | Obim Medical Centre                      | Ikom                                                        |
| 607 | CR/0128 | Ekana Medical Centre                     | Ogada, Obubra                                               |
| 608 | CR/0129 | Simba Clinic and Maternity               | Mkpani Junction                                             |
| 609 | CR/0130 | Nkem Clinic & Maternity                  | 94, Ikom - Calabar Road, Ugep.                              |
| 610 | CR/0131 | Mercy Clinic & Maternity                 | No. 1 Ministry of Works Road, Igoli, Ogoja                  |
| 611 | CR/0132 | Egozi Clinic                             | Magistrate Road, Ugep, Yakurr                               |

|     |         |                                        |                                                                                             |
|-----|---------|----------------------------------------|---------------------------------------------------------------------------------------------|
| 612 | CR/0133 | Awukams Clinic                         | No.7 Awukams Crescent off Ogoja Road, Ikom.                                                 |
| 613 | CR/0134 | Kusaki Medical Services (ABEK)         | Ikom                                                                                        |
| 614 | CR/0135 | Integrity Clinic                       | Behind Dapani Hotel, Ikom                                                                   |
| 615 | CR/0136 | Jody Clinic                            | Okundi, Boki LGA                                                                            |
| 616 | CR/0137 | Ubi Medical Consult                    | 24 Old Market Road Ijom - Ugep                                                              |
| 617 | CR/0138 | Pace Clinic                            | 96 Mcc Road Calabar                                                                         |
| 618 | CR/0139 | St Peter Hospital                      | Idum-Mbube Ogoja                                                                            |
| 619 | CR/0142 | NNSS Sick Bay                          | Calabar                                                                                     |
| 620 | CR/0144 | Bassey Enun Specialist Clinic Annex    | Bakpan Biase Cross River State.                                                             |
| 621 | CR/0145 | Alice Effanga Okon Specialist Clinic   | No.4 Ekenglwatt Street, Calabar South, Cross River State                                    |
| 622 | CR/0146 | General Hospital Bekwara               | Abochichi Cross River State                                                                 |
| 623 | CR/0147 | Progress Clinic And Maternity          | No.4, Edim Ekong Oqua, Off Eta Agbor, Cross River State.                                    |
| 624 | CR/0148 | Luksana Foundation Medical Centre      | 1,Ntol Mgbeje Street, Igoli, Ogoja Cross River State                                        |
| 625 | CR/0149 | Calabar Women and Children Hospital    | 164/165 Murtala Mohammed Way Calabar                                                        |
| 626 | CR/0152 | Luciama Memorial Specialist Hospital   | No.10 Luciama Hospital Road, Off Water Intake Road-Ikot Effanga, Calabar Cross River State. |
| 627 | CR/0153 | Angels Clinic                          | No.10 Ikom-Calabar Road Ugep Cross River State                                              |
| 628 | CR/0154 | Nigeria Customs Service Medical Centre | Nigeria Customs Service, Opp. Airport, Calabar Cross River State                            |
| 629 | CR/0155 | Bakor Hospital Ltd                     | No.7,Hospital Road, Nde 3,Ikom Cross River State                                            |
| 630 | CR/0158 | Mary Mother Of Mercy Specialist Clinic | 14, Ukpong Archibong Street, Essien Town, Calabar Cross River State.                        |
| 631 | DT/0001 | May Flower Clinic & Maternity          | 54 Nnebisi Road, Off Cable Point Asaba                                                      |
| 632 | DT/0002 | Good Samaritan Hospital                | 3 Good Samaritan Rd, Cable Point-Asaba                                                      |
| 633 | DT/0004 | Crest Clinics                          | 30, Ezenei Avenue, Asaba                                                                    |
| 634 | DT/0012 | Oghor Specialist Clinic & Hospital     | Izobo Street, Effurum                                                                       |
| 635 | DT/0014 | Caboc Dental Clinic                    | Plot 540, 12th Ddpa, Airport Road, Effurum                                                  |
| 636 | DT/0023 | Sapele Clinic                          | 181, New Ogorode Road                                                                       |
| 637 | DT/0027 | Kwofia Clinic And Maternity            | 3, Kwofia Close, Po Box 35, Ovwian, Delta St.                                               |
| 638 | DT/0029 | Ufor Hospital                          | 19, Uloho Avenue Off Isoko Rd Ughelli                                                       |
| 639 | DT/0032 | Erada Clinic And Maternity             | 9, Marioghae Str., Atamakolomi Layout,Off Udu Rd, Enerhen, W                                |
| 640 | DT/0033 | Estate Specialist Hospital             | 47, Onofegbara Str., Polokor Market, Warri                                                  |

|     |         |                                           |                                                                              |
|-----|---------|-------------------------------------------|------------------------------------------------------------------------------|
| 641 | DT/0035 | Twins Clinic/Maternity Annexe             | No. 1, Twins Clinic Drive, Off Deco Rd., Warri                               |
| 642 | DT/0036 | Fountains Clinic And Maternity            | 1, Enughe Str., Off Ogorikoko Road, Warri                                    |
| 643 | DT/0037 | Elohor Clinic And Maternity               | No. 200 Old Ughelli-Warri Road, Oviri-Agbarho, Delta State                   |
| 644 | DT/0038 | Deko Specialist Clinic                    | 1, S. O. Agbowu Str .,By Efejuku Str, Off Deco Road, Warri                   |
| 645 | DT/0039 | Winrose Clinic Limited                    | Enerhen Road, Effurum                                                        |
| 646 | DT/0060 | Federal Medical Centre Asaba              | Asaba                                                                        |
| 647 | DT/0063 | Sage Clinic                               | 29 Okere/Ugborikoko Road Okumagba Layout, Warri                              |
| 648 | DT/0064 | Central Hospital Warri                    | 1 Mabiaku RD NPA, Warri, Delta State                                         |
| 649 | DT/0065 | Capitol Hill Clinic                       | 2 Omamofe Silo Str Warri                                                     |
| 650 | DT/0066 | Agbawus Medical Centre                    | 3, Ogbo Drive, Ekurede, Warri                                                |
| 651 | DT/0068 | Goodnews Hospital                         | Omatar Street, Off Refinery Road by WOPOT Company, Ekpan, Warri, Delta State |
| 652 | DT/0069 | Etefia Clinic                             | 25, Oruhworun Road, Po Box 12, Ovwian, Warri                                 |
| 653 | DT/0070 | Veenell Hospital                          | Okumagba Avenue, Warri                                                       |
| 654 | DT/0083 | DSS Clinic                                | Asaba, Delta State                                                           |
| 655 | DT/0084 | Central Hospital Ughelli                  | Ughelli, Delta State                                                         |
| 656 | DT/0088 | Humanity Hospital                         | No. 3 Enere Road, Warri, Delta State                                         |
| 657 | DT/0090 | Westend Hospital                          | 2, 25th Street, Airport Road, Warri, Delta State                             |
| 658 | DT/0092 | Ame Specialist Hospital                   | 15, Okumagba Avenue, Warri, Delta State                                      |
| 659 | DT/0093 | 93 Bn MRS, Warri                          | Warri, Delta State                                                           |
| 660 | DT/0094 | Navy Medical Centre                       | Nigerian Naval Engineering College, Naval Base, Ogorode, Sapele Delta State  |
| 661 | DT/0095 | Sick bay NNS DELTA                        | Warri, Delta State                                                           |
| 662 | DT/0096 | Ebony Clinic & Maternity                  | 109 Okumagba Avenue, By Ojabugbe Junction Warri, Delta State                 |
| 663 | DT/0098 | Radio Road Clinic & Maternity             | 9 Radio Road, Off Lower Erejinwa Road, Warri, Delta State                    |
| 664 | DT/0099 | Ogana Memorial Clinic & Maternity         | 33, Ginuwa Road by Ogboru Junction, Delta State                              |
| 665 | DT/0100 | St. Georges Specialist Clinic & Maternity | 4, Idoma Street (Opp. Palm Grove Motel Gate), Warri, Delta State             |
| 666 | DT/0101 | Vertimon Medical Centre                   | 3 Merogun Srt, Warri, Delta State                                            |
| 667 | DT/0102 | Day Spring Clinic                         | Plot 57C 14th Street, D.D.P.A., Effurun, Warri, Delta State                  |
| 668 | DT/0103 | Lily Clinic/Hospital                      | 6 Brisbe Street Off Deco Rd, Warri Delta                                     |
| 669 | DT/0111 | Petroleum Training Institute (Hospital)   | Effurun, Delta State.                                                        |

|     |         |                                 |                                                                                                          |
|-----|---------|---------------------------------|----------------------------------------------------------------------------------------------------------|
| 670 | DT/0112 | Police Clinics, Delta           | Delta State                                                                                              |
| 671 | DT/0113 | Camp Clinic                     | Steel Town 2, Ohioworun, Delta State                                                                     |
| 672 | DT/0114 | Fairview Hospital               | 1A, Akpu Street, Okumagba Avenue, Warri, Delta                                                           |
| 673 | DT/0115 | GN-Children's & Gen. Med. Cli   | 3, Enakeyarhe-Ukuwere Street, DDPA, Ugborikoko, Effuru                                                   |
| 674 | DT/0116 | Group Christian Hospital        | Inside Mosheshe Estate, off Airport Road, Effurun                                                        |
| 675 | DT/0118 | Kings Clinic                    | 100, Okere Road, Warri                                                                                   |
| 676 | DT/0119 | Kowa Clinic Ughelli             | 15, Isoko Road, Delta State                                                                              |
| 677 | DT/0120 | Lonia Clinic & Maternity        | 143 Ekete-DSC Express Way, Ovwian, Warri                                                                 |
| 678 | DT/0121 | Madona Clinics                  | 60, Enerhen Road, Delta                                                                                  |
| 679 | DT/0124 | Pearl Clinic                    | Plot 621, Nienogha Avenue, Delta                                                                         |
| 680 | DT/0125 | Regal Clinic & Maternity        | 226, Jakpa Road, Effurun, Delta State                                                                    |
| 681 | DT/0126 | Rideno Clinic                   | 26b, Aragba Road, Orhuwhorun                                                                             |
| 682 | DT/0127 | Solar Clinic                    | 1, Erhie Street, off Giwa Amu Road, Warri                                                                |
| 683 | DT/0129 | St. Joseph Catholic Hospital    | 142, Nnebisi Road, Delta                                                                                 |
| 684 | DT/0130 | St. Louis Clinic                | 4, Okundolor Street, off Ogbunu Road, Warri                                                              |
| 685 | DT/0131 | Obule Medical Centre            | 115, Okpe Road, Sapele                                                                                   |
| 686 | DT/0132 | Viva Clinic                     | 6, Okere Ogborikoko Road, Okumagba layout                                                                |
| 687 | DT/0133 | Winners Clinic                  | 3, Tom Bra Close (off airport road, by DDPA, Effurun                                                     |
| 688 | DT/0149 | B.U.Clinics & Hospital LTD      | 26 Kotie Street, Warri                                                                                   |
| 689 | DT/0152 | Assumption Clinic & Maternity   | 8 Idiaregbe Street, Okumagba Layout, PO Box 137, Warri                                                   |
| 690 | DT/0154 | St Patricks Specialist Clinic   | 131 Effurun / Warri Road                                                                                 |
| 691 | DT/0155 | Assumption Clinic & Maternity   | 8 Idiaregbe Street, Okumagba Layout, Warri                                                               |
| 692 | DT/0157 | Solar Clinic                    | 1 Erhie Street Off Giwa Avenue Amu Road                                                                  |
| 693 | DT/0163 | Shekinah Medical Centre Limited | Opp. Heros Of Faith Church, Aro Rd Off Ughelli-Patani RD, Ughelli, Delta state                           |
| 694 | DT/0164 | Marilo Clinic and Maternity     | 1 Celestial Church Road, off Ezenei Avenue, Asaba                                                        |
| 695 | DT/0165 | Island Clinic & Maternity       | 100,Okere Ugborkoko Road, Okumagba Layout ,Warri, Delta State                                            |
| 696 | DT/0166 | Okparavero Memorial Hospital    | No 159,Sapele rd, Okirighwre, Sapele, Delta State                                                        |
| 697 | DT/0167 | First-Rank Hospital LTD         | 27,Ejewor Street, Behind Gateway To Heaven Ministry 24/26 Arubaye St.Okumagba Layout, Warri, Delta State |

|     |         |                                                         |                                                                      |
|-----|---------|---------------------------------------------------------|----------------------------------------------------------------------|
| 698 | DT/0168 | Shepherd Hospital And Fertility Center                  | 100B Edjeba RD, Warri, Delta State                                   |
| 699 | DT/0169 | Rapha Specialist Children and General Hospital          |                                                                      |
| 700 | DT/0170 | St. Andrew`s Hospital                                   | 39,Robert Road, Warri Delta State                                    |
| 701 | DT/0171 | Mudiaga Faith Medical Center                            | 5,Ogbe Avenue Opp.                                                   |
| 702 | DT/0175 | Abieyuwa Spec.Clinic                                    | 16 Edeyan Str.Masoje Junction Off PTI Road, Effurun Delta State      |
| 703 | DT/0176 | Onoruvie Memorial Clinic                                | 17A Onoruvie Street Ozoro(Former Uvie Clinic)Delta State             |
| 704 | DT/0178 | Glorious Star Hospital LTD                              | Salubi Layout, Opp. Orodje Grammer School, Sapele, Delta State       |
| 705 | DT/0180 | Liberal Clinic And Diagnostic Centre                    | 187,Sapele-Warri RD, Opp. Zenith Bank Sapele Delta State             |
| 706 | DT/0181 | Numa Clinic And Maternity                               | No 4, Numa Street Warri, Off Lower Ere-Jiwa,Warri Delta State        |
| 707 | DT/0182 | Purity Specialist Hospital                              | 2 Eru Street By Agbaiho/DSC Roundabout Ebrumade, Effurun Delta State |
| 708 | DT/0183 | Anioma Hospital                                         | No 13,Memeh Street, Boji Boji,Owa,Agbor, Delta State                 |
| 709 | DT/0185 | St. Rebecca Specialist Hospital                         | 44 Denis Osadebay Way Asaba, Delta State                             |
| 710 | DT/0186 | Federal University Of Petroleum Resources Health Centre | Ugbomro Effurun, Delta State                                         |
| 711 | DT/0189 | 3-H Clinic & Maternity                                  | 7 Visah Street Off Urhiomwun Rd Ovwian, Delta State                  |
| 712 | DT/0190 | James Clinic And Maternity Services                     | No 259,Sapele/Warri RD, Sapele, Delta State                          |
| 713 | DT/0191 | Vicah Clinic & Hospital                                 | 6 Maduku Street Okumagba Layout Warri, Delta State                   |
| 714 | DT/0193 | St.John The Baptist Catholic Hospital And Maternity     | Alika Street , Boji-Boji Owa ,Delta State                            |
| 715 | DT/0195 | Divine Grace Hospital Limited                           | Km 2 Refinery Road, By Mcaiver Hotel, Effurun Delta State            |
| 716 | DT/0200 | Healing Streams Clinic And Maternity                    | No 2, Plot 29,DDPA Estate, Igbudu,Warri Delta State                  |
| 717 | DT/0201 | St. Luke Hospital Asaba                                 | Opp Delta Broadcasting Office Asaba, Delta State                     |
| 718 | DT/0202 | El-comfort Hospital                                     | 1,Fear God Street, BONSASC, Asaba, Delta Street                      |
| 719 | DT/0203 | Lana Hospital                                           | 48, Atufe Road, Off Oke Road, Sapele Delta State.                    |
| 720 | DT/0205 | Macap Clinic & Maternity                                | Egbokodo Road, By Amanoristsewor Junction Ubeji, Warri, Delta State  |
| 721 | DT/0207 | Shabach Hospitals Ltd                                   | 200 PTI Road, By Sunny Eru Motors, Effurun, Delta State              |

|     |         |                                                        |                                                           |
|-----|---------|--------------------------------------------------------|-----------------------------------------------------------|
| 722 | DT/0208 | Twin City Hospital & Diagnostic Centre                 | 99, Osadebey Way, Asaba Delta State                       |
| 723 | DT/0209 | Group Christian Medical Hospital                       | 3, Shirlet Onyemene Street, Okpanam, Asaba Delta State    |
| 724 | DT/0210 | Kenet Group Medical Services                           | 14, Nwaezeapu Street, Off Nnebisi Road, Asaba Delta State |
| 725 | DT/0212 | Komfort Consult & Surgery                              | 5, Debe Crescent, Okpanam, GRA, Asaba, Delta State.       |
| 726 | DT/0213 | Queen Of Apostles Catholic Hospital                    | Obiaruku, Delta State                                     |
| 727 | DT/0214 | Catholic Hospital Abbi                                 | Ogbezi Road, Abbi. Delta State                            |
| 728 | EB/0001 | Mercy Hospital                                         | 26, Obi Street Abakaliki                                  |
| 729 | EB/0002 | St. Joseph's Hospital And Maternity                    | Arikpe Street Abakaliki                                   |
| 730 | EB/0003 | St. Theresa's Hospital & Mate                          | 18 Jameni Street Abakaliki                                |
| 731 | EB/0004 | Christ The King Hospital                               | 85, Afikpo Road, Abakaliki                                |
| 732 | EB/0007 | Federal Teaching Hospital, Abakaliki                   | Opposite Police Barracks                                  |
| 733 | EB/0008 | Holy Trinity Hosp. And Maternity                       | Abakaliki                                                 |
| 734 | EB/0027 | Afikpo Medical Centre                                  | Eke Market Road                                           |
| 735 | EB/0030 | Presbyterian Joint Hospital                            | Uburu Ohaukwu Local Govt. Area                            |
| 736 | EB/0032 | DSS Clinic                                             | Abakaliki, Ebonyi State                                   |
| 737 | EB/0034 | Child Health Consultant Clinic                         | 6, Afikpo Street, Abakaliki, Ebonyi State                 |
| 738 | EB/0037 | Felix Memorial Hospital                                | Abakaliki, Ebonyi State                                   |
| 739 | EB/0039 | Cant MRS Abakaliki                                     | Abakaliki, Ebonyi State                                   |
| 740 | EB/0040 | Felysussy Memorial Hospital                            | 12 Onitsha Str Abakaliki                                  |
| 741 | EB/0042 | Police Clinics, Ebonyi                                 | Ebonyi State                                              |
| 742 | EB/0043 | Medical Centre Akanu Ibiam Federal Polytechnic, Unwana | Ibeyi, Ebonyi State                                       |
| 743 | EB/0051 | Kanmelu Hospital                                       | 5 Ekwulimi Street, Abakaliki                              |
| 744 | EB/0052 | Ericon Hospital                                        | 45B Enugu Road, Abakaliki                                 |
| 745 | EB/0053 | Grace Hospital                                         | 4 Gunning Road, Abakaliki                                 |
| 746 | EB/0056 | Mater Misericordiae Hospital                           | Afikpo North LGA                                          |
| 747 | EB/0058 | Federal University Ndufu-Alike Ikwo Medical Centre     | Federal University Ndufu-Alike Ikwo, Ebonyi State         |
| 748 | EB/0060 | El- Shaddai Specialist Hospital                        | 44 Ogoja Rd. Abakaliki, Ebonyi State.                     |
| 749 | ED/0001 | General Hospital, Afuze                                | Afuzé                                                     |
| 750 | ED/0002 | General Hospital, Igarra                               | Igarra, Akoko-Edo                                         |
| 751 | ED/0003 | Government Hospital                                    | Ibillo                                                    |
| 752 | ED/0004 | District Hospital, Akoko-Edo                           | Uneme-Osu                                                 |
| 753 | ED/0009 | Psychiatric Hospital                                   | Uselu                                                     |
| 754 | ED/0010 | Ise Clinic & Maternity                                 | 37a Textile Mill Road, Benin                              |
| 755 | ED/0011 | Mount Gilead Hospital                                  | Off Uselu, Lagos Road, Benin City                         |
| 756 | ED/0015 | District Hospital, Irrua                               | Usugbenu-Irrua                                            |
| 757 | ED/0016 | Irrua Specialist Hospital                              | Irrua                                                     |
| 758 | ED/0021 | Central Hospital, Uromi                                | Uromi                                                     |
| 759 | ED/0024 | General Hospital, Ubiaja                               | Ubiaja                                                    |
| 760 | ED/0025 | District Hospital, Ewohinmi                            | Ewohimi                                                   |
| 761 | ED/0026 | General Hospital, Iruekpen                             | Iruekpen, Along Benin Auchi Road                          |
| 762 | ED/0027 | General Hospital, Ekpoma                               | Ekpoma                                                    |



|     |         |                                     |                                                              |
|-----|---------|-------------------------------------|--------------------------------------------------------------|
| 763 | ED/0032 | General Hospital, Anegbette         | Anegbette                                                    |
| 764 | ED/0033 | General Hospital, Agenebode         | Agenebode                                                    |
| 765 | ED/0035 | General Hospital, Agbede            | Agbede                                                       |
| 766 | ED/0036 | Central Hospital, Auchi             | Auchi                                                        |
| 767 | ED/0037 | Fate Medical Centre                 | 99 Jatt/Auchi Junction                                       |
| 768 | ED/0041 | General Hospital, Igueben           | Igueben                                                      |
| 769 | ED/0043 | Narrow Way Clinic                   | No.9, S. Ahahor Street, Off Benin-Auchi Expressway, Aduwawa  |
| 770 | ED/0045 | Cina Well Point Hospital            | 16b Oviasogie Street, Theresa Cath. Church Road, New Benin   |
| 771 | ED/0046 | Oreste Medical Centre               | 58 Akenzua Way, Benin City                                   |
| 772 | ED/0047 | Owen Clinic                         | Upper Mission Road, Benin                                    |
| 773 | ED/0049 | Ekpen Hospital                      | Off Agho Street, Off Ekwenwan Road                           |
| 774 | ED/0050 | Central Hospital, Benin             | Along Sapele Road, Near Ring Road, Benin                     |
| 775 | ED/0055 | General Hospital, Orhionmwom        | Abudu Town, Orhionmwom                                       |
| 776 | ED/0057 | Government Hospital, Urhonigbe      | Urhonigbe Along Agbor Abraka Road.                           |
| 777 | ED/0061 | Igbinedion Hospital & Med. Research | Okada Wonderland                                             |
| 778 | ED/0062 | District Hospital, Ekiadolor        | Ekiadolor                                                    |
| 779 | ED/0065 | General Hospital, Iguobazuwa        | Iguobazuwa Town, Hq Of Ovia South-West, LGA                  |
| 780 | ED/0066 | Government Hospital, Usen           | Usen                                                         |
| 781 | ED/0072 | Government Hospital, Uzeba          | Uzeba                                                        |
| 782 | ED/0076 | District Hospital, Uhunmwode-Egba   | Egba                                                         |
| 783 | ED/0077 | Cottage Hospital, Obayanto          | Obayantor, Along Sapele Road, New Benin Owena River Basin De |
| 784 | ED/0079 | District Hospital, Apana            | Apana                                                        |
| 785 | ED/0080 | General Hospital, Fugar             | Fugar                                                        |
| 786 | ED/0082 | St. Margaret's Hospital & Maternity | No.1, St. Margaret's Hospital Drive, Upper Sakpoba Road, Ben |
| 787 | ED/0084 | Azuwa Hospital                      | 2nd West East, Benin City                                    |
| 788 | ED/0085 | Modic Medical Centre                | No. 6 Akenzue Street, Ogbe, Benin City                       |
| 789 | ED/0086 | Aiwuyor Memorial Clinic             | 30a, Uwa Street, Off 2nd East Circular Road, Benin City      |
| 790 | ED/0087 | Urban Medical Centre                | Warrake                                                      |
| 791 | ED/0088 | Safe Haven Hospital                 | No 11 Erhumuse, Ehaikpen Street                              |
| 792 | ED/0089 | Ihenyen Medical Centre              | No. 22, Ogbefun Street, Off College Road, Benin City         |
| 793 | ED/0090 | Time Hospital                       | 3,2, Agbonma Lane, Off Ekwenwa Road, Benin City              |
| 794 | ED/0091 | God's Victory Clinic & Maternity    | 15 Obayuwuna Street, Off Siluko Road, Benin City             |
| 795 | ED/0092 | Government Hospital, Igbanke        | Igbanke Along Uromi Road                                     |
| 796 | ED/0114 | Iyare Clinic                        | 10, Second Adokpolor Street, Off Med. Stores Ltd, Benin      |
| 797 | ED/0117 | Madonna Clinic                      | Ibillo                                                       |

|     |         |                                              |                                                                                             |
|-----|---------|----------------------------------------------|---------------------------------------------------------------------------------------------|
| 798 | ED/0118 | University Of Benin Teaching Hospital Ugbowo | Benin City                                                                                  |
| 799 | ED/0119 | DSS Clinic                                   | Benin, Edo State                                                                            |
| 800 | ED/0120 | Military Hospital, Benin                     | Benin City, Edo State                                                                       |
| 801 | ED/0121 | 81 AMG Medical Centre                        | NAF Station, Benin                                                                          |
| 802 | ED/0125 | 4 Bde MC Benin                               | Benin, Edo State                                                                            |
| 803 | ED/0126 | NASEME MIR Auchi                             | Auchi, Edo State                                                                            |
| 804 | ED/0127 | University of Benin Health Centre            | Benin, Edo State                                                                            |
| 805 | ED/0129 | Cottage Hospital/Comprehensive Health Centre | Edo State Police Command, Edo State                                                         |
| 806 | ED/0131 | St. Mary Magdalene Hospital                  | 8 Isibor Street off 3rd East Corator Rd., Off Murtala Mohd Way, Benin City                  |
| 807 | ED/0132 | Niger Clinic                                 | 1 Ogbemudia Street, Behind Maria Filling Station Benin City                                 |
| 808 | ED/0133 | Ayunko Clinic & Maternity                    | 39 Fed. Govt. College Rd., Ibillo                                                           |
| 809 | ED/0134 | Hope Clinic & Maternity                      | No. 1 Whythouse Street, Jatau, Auchi, Edo State                                             |
| 810 | ED/0135 | Faith Mediplex                               | Igiwa-Amadi/Airport Road GRA, Benin City, Edo State                                         |
| 811 | ED/0137 | Shalom Clinic & Maternity                    | 6, Irhinmwiangbon Street, along Coolers Street, Off 1st Power Line, Useh Qtrs, Benin City   |
| 812 | ED/0138 | Osula Royal Hospital                         | No.5 Idahosa Lane, Oredo LGA                                                                |
| 813 | ED/0139 | The Rock Hospital                            | 39 Imuetinyan Street, Off Ihama Rd, G.R.A Benin Edo State                                   |
| 814 | ED/0142 | Our Medical Centre                           | No. 2 Oregbeni Street, Ikpoba Hill, Ikoba, Benin City                                       |
| 815 | ED/0143 | Lahor Research Lab. & Medical Centre         | 121 Old Benin, Agbor Road, Benin City                                                       |
| 816 | ED/0144 | St. Rapheal Hospital                         | 12, Adesua Road, Oredo LGA, Benin City                                                      |
| 817 | ED/0145 | Aniso Specialist Medical Center              | No. 11 2nd Fed. Road, Off 4th Srt Road or Off Benin Technical Coal Rd, Uselu Ltd Benin City |
| 818 | ED/0146 | Lio-la Cross Hospital                        | 1 Upper Wisdom Street Off 2nd East Road Benin                                               |
| 819 | ED/0164 | National Institute of Oil Palm Research, Edo | Ovia North LGA, Edo State                                                                   |
| 820 | ED/0165 | Akemekhai Medical Centre                     | 3, Oyerekhau Lane, Jattu, Esako West, Auchi, Edo State                                      |
| 821 | ED/0167 | Auchi Polytechnic Medical Centre             | Auchi, Edo State                                                                            |
| 822 | ED/0168 | Hope Hospital & Maternity                    | 42, Costain Road, Benin, Edo State                                                          |
| 823 | ED/0170 | Radiance Clinic & Maternity                  | Plot 194, Country Home Hotel Road, off Sapele Road, Benin City                              |
| 824 | ED/0171 | Ogbeide Gen. Practice Clinic                 | 58, Uwa Str., off 2nd East Circular Road, Benin.                                            |
| 825 | ED/0172 | Morat Clinic                                 | 5, Akugbe Str., Upper Siluko Road, Benin                                                    |

|     |         |                                           |                                                                                   |
|-----|---------|-------------------------------------------|-----------------------------------------------------------------------------------|
| 826 | ED/0174 | Christway Medical Centre                  | 31, Uwa Str., Off Murtala Mohammed Way, Benin                                     |
| 827 | ED/0175 | Royal Crown Clinic and Maternity          | 7, Okhuowaruyi Street, Benin                                                      |
| 828 | ED/0176 | Hope Medical Centre, Igbueben             | 7 Suleman Street off sapele road, Benin City                                      |
| 829 | ED/0177 | Berta Medical Centre                      | New Upper Mission Road Extension, Aduwawa, Benin                                  |
| 830 | ED/0178 | Gift Medical Clinic                       | 6a, Iyamu Str., off Erie Str., Benin                                              |
| 831 | ED/0179 | Echos Hospital                            | 5, Benin Technical College Road, Benin                                            |
| 832 | ED/0180 | Dekins First Trinity Medical Centre       | 1, Bieni Avenue, off court road, Abudu, Benin                                     |
| 833 | ED/0181 | Chisi Cottage Clinic                      | PCU Quarters, by Asoro Hills, Ekenwa                                              |
| 834 | ED/0182 | Bamby Hospital                            | 147, Siluko Road, Benin                                                           |
| 835 | ED/0183 | St. Luke's Clinic & Maternity             | 29, Ihumudumu Road, Ekpoma, Edo State                                             |
| 836 | ED/0184 | Irowa Medical Centre                      | Jos-Bazuaye Est. off Sapele Road, Benin, Edo State                                |
| 837 | ED/0214 | S & T MRS, Benin                          | Benin                                                                             |
| 838 | ED/0215 | 195 BN MRS, Agenebode                     | Agenebode                                                                         |
| 839 | ED/0217 | St Philomina Catholic Hospital            | 23 Dawson Road, off Mission Road, Benin City                                      |
| 840 | ED/0218 | Stella Obasanjo Women & Children Hospital | Country Home, Hotel Road, Benin City                                              |
| 841 | ED/0219 | Christ Medical Centre                     | 18B Ogbesasa Street, Off Sapele Road, Off Sokponba Road, PO Box 3096, Benin       |
| 842 | ED/0222 | Irele Ifijeh Hospital Limited             | 22 Lucky Igbinedion Way, Ikpoba Hill, Benin City                                  |
| 843 | ED/0223 | Ovbioise Hospital                         | 2 Isibor Aigbontaen Street, Aduwawa, Benin City                                   |
| 844 | ED/0225 | Vinda Medical Clinic                      | 10A First Uwa Lane, Opp. Adesuwa RD Junction, Off Sapele RD, Benin City Edo State |
| 845 | ED/0228 | Aimiwu Hospital                           | 36 Eghosa Street Off Erhumwunse street, Benin Edo State                           |
| 846 | ED/0230 | City Hospital Auchi                       | 36 Eghosa Street Off Erhumwunse street, Benin Edo State                           |
| 847 | ED/0231 | Flowell Pharma Nig.Ltd                    | 69b Sapele RD.                                                                    |
| 848 | ED/0232 | Quality Medical Centre                    | 25, Erinmwiogha Street, Opp. Benin Tech. Coll. Road, Benin City Edo State         |
| 849 | ED/0233 | Life Medical Centre                       | 34 Guobadia Street, Off Ugbor Rd, G.R.A, Benin City Edo State.                    |
| 850 | ED/0235 | Enofe Medical Centre                      | 5 Ajayi Street Off Okpagma Rd, Eyaen, Edo State                                   |
| 851 | ED/0237 | Aigbogun Clinic And Maternity             | 52, Old Benin Asaba Road,                                                         |

|     |         |                                       |                                                                                                    |
|-----|---------|---------------------------------------|----------------------------------------------------------------------------------------------------|
| 852 | ED/0238 | Bode Medical Center                   | New Auchi Road, Upland Agenebode Edo State                                                         |
| 853 | ED/0239 | Bazuaye Hospital                      | 34 Costain Rd, New Benin Edo State                                                                 |
| 854 | ED/0241 | Fountain Of Life Specialist Hospital  | 3B Ogbesasa Street, Off Sapele Road Edo State                                                      |
| 855 | ED/0242 | Edi International Hospital            | No. 1, Coronation Drive, Off Adeyan Avenue ,G.R.A Benin City Edo State                             |
| 856 | ED/0244 | Abe Medical Clinic And Maternity      | 17 Aruosa St, Off Sokponba Rd, Benin City Edo State.                                               |
| 857 | ED/0248 | Total Health Medical Services Center  | 20, Ayo-Idiaghe Street, Isiohor, Benin Edo State                                                   |
| 858 | ED/0249 | Standard Medical Clinic And Maternity | No. 14, Eyeye St, Off Uwasota, Ugbowo, Benin City, Edo State                                       |
| 859 | ED/0251 | General Hospital Sabogidda-Ora        | General Hospital Sabogidda-Ora Owan West Edo State                                                 |
| 860 | ED/0252 | Amanfoh Nursing And Maternity Home    | 20, Old Ukoni Road , Uromi , Edo State                                                             |
| 861 | ED/0253 | Ebony Medical Centre                  | 59 Uwasota Rd, Ugbowo Benin City Edo State                                                         |
| 862 | ED/0254 | Aipoh Medical Centre                  | 6, Obayagbona Street, by Spirit & Life Bible Church (Joromi Road) Off Ekenwa Road, Benin Edo State |
| 863 | ED/0255 | Bethel Faith Medical Centre           | Plot 11 and 12, Jos Bazuaye Layout, Erediawa Street, Off Ekenwan Road, Benin City, Edo State       |
| 864 | ED/0258 | Suyi Hospital                         | No. 110/112, MM Way, Benin City Edo State.                                                         |
| 865 | ED/0260 | Isda Hospital                         | 4, Aghavbere Street, Off Agbonkina Street Off Benin/Abraka Road, Idogbo Community, Benin Edo State |
| 866 | ED/0261 | Police Hospital Benin G.R.A           | Plot 12, Dennis Osadebey Avenue, Benin Edo State                                                   |
| 867 | ED/0262 | Akugbe Medical Center                 | No. 9, Omokaro St. Off Upper Sokponba RD , Benin City Edo State                                    |
| 868 | ED/0263 | Faith Dome Medical Centre             | No. 3, Itama Street, Eguare Ekopma Edo State                                                       |
| 869 | ED/0264 | Eromosele Medical Centre              | Ujoelen Road Ekpoma                                                                                |
| 870 | ED/0265 | Enoma Medical Center                  | 3, Hospital Road, Off Old Benin Agbor Road, Ogbeson, Benin Edo State                               |
| 871 | ED/0267 | Tona Hospital                         | No. 2, Ighodalo Street, Off Benin-Agbor Road , Ikpoba Hill, Benin City, Edo State                  |
| 872 | ED/0268 | Ropheka Specialist Clinic & Maternity | 22, Upper Ewekan Road,                                                                             |

|     |         |                                         |                                                                                            |
|-----|---------|-----------------------------------------|--------------------------------------------------------------------------------------------|
| 873 | ED/0269 | Okougha Medical Center                  | Behind Aoma (UZEBBA) Market<br>Uzebba Owan                                                 |
| 874 | ED/0270 | Halpha Specialist Hospital              | 1,Akhiobanke Street, G.R.A, Benin Edo State                                                |
| 875 | ED/0271 | Unique Hospital And Maternity.          | 64,Uwarrake Road, Opp. Uwarrake Motor Park, Auchi Edo State                                |
| 876 | ED/0272 | Gims Clinic LTD                         | 12 Edebiri Street ,Ogbe Quarters, Benin City Edo State                                     |
| 877 | ED/0273 | Mega Clinic And Maternity               | 271 Upper Siluko RD ,Beside Noma Petrol, Ogida, Benin City Edo state                       |
| 878 | ED/0275 | Eguavon Medical Centre                  | No 5,Abia,Iruekpen,Ekpoma,Edo State                                                        |
| 879 | ED/0276 | Oriaifo Medical Center                  | No 1,Oriaifo Close, Uromi-Illushi Road, Uromi Edo State                                    |
| 880 | ED/0278 | Eseohe Medical Center                   | No. 2,Police Barrack RD ,Off Benin Auchi Express Way, Beside Mousco Petrol Station ,Ekpoma |
| 881 | ED/0279 | Halpha Specialist Hospital              | 1, Akhiobanke Street, G.R.A, Benin                                                         |
| 882 | ED/0280 | Jimon Medical Center                    | 152, Upper Owina Street Evgotubu Qtrs, Benin Edo State.                                    |
| 883 | EK/0001 | St.Gregory Hospital                     | KM 2 Basiri Iyin Road, Ado Ekiti                                                           |
| 884 | EK/0002 | Olumorin Specialist Hospital            | Ado-Ekiti                                                                                  |
| 885 | EK/0003 | Ayobola Hospital                        | 22,Ekute Quarters Ado-Ekiti                                                                |
| 886 | EK/0004 | Ade-Tade Hospital                       | 11, Okebola Street, Ado Ekiti                                                              |
| 887 | EK/0005 | Orire Hospital Complex                  | 1, Orire Lane, Box 944, Ado Ekiti                                                          |
| 888 | EK/0006 | University Teaching Hospital, Ado Ekiti | Ado Ekiti                                                                                  |
| 889 | EK/0007 | Federal Teaching Hospital               | Ido Ekiti                                                                                  |
| 890 | EK/0008 | Alafia Hospital                         | Off State Housing Estate Rd., Off Adebayo Road, Ado Ekiti                                  |
| 891 | EK/0009 | Trinity Medical Centre                  | Km 3, Iwokoro Rd., Ado Ekiti                                                               |
| 892 | EK/0010 | Supreme Faith Hospital                  | Ado                                                                                        |
| 893 | EK/0011 | Joe-Jane Medical Centre                 | 27 Dallimore Street, Ado Ekiti                                                             |
| 894 | EK/0012 | Divine Citadel Hospital                 | Coca Cola Bus Stop, Ajibosun Street, Ado Ekiti                                             |
| 895 | EK/0027 | DSS Clinic                              | Ado-Ekiti, Ekiti State                                                                     |
| 896 | EK/0028 | Comprehensive Health Centre             | Okesa, Ado Ekiti, Ekiti State                                                              |
| 897 | EK/0029 | Adetoyin Hospital                       | No. L16 Onigari, Secretariat Rd., Ado Ekiti                                                |
| 898 | EK/0031 | Cottage Hospital, Ado-Ekiti             | Ekiti State                                                                                |
| 899 | EK/0032 | Federal Polytechnic Health Centre       | Ado Ekiti, Ekiti State                                                                     |
| 900 | EK/0033 | VICTORY HOSPITAL                        | 2 AWEDELE STR, ADO-EKITI                                                                   |
| 901 | EK/0034 | STATE SPECIALIST HOSPITAL               | IKOLE-EKITI                                                                                |
| 902 | EK/0035 | UNIVERSITY OF ADO EKITI HEALTH CENTRE   | MAIN CAMPUS                                                                                |
| 903 | EK/0036 | PRAISE THE LORD MEDICAL CENTRE          | 7 ISATO STR, IRONA ADO EKITI                                                               |
| 904 | EK/0037 | OGUNTOYE HOSPITAL                       | 136 ILAWE RD, ADO EKITI                                                                    |
| 905 | EK/0038 | Endoscopy De Gilead Specialist Hospital | 1, Gilead Lane, NTA Road, off Ilawe Road, Ado-Ekiti                                        |

|     |         |                                               |                                                                                              |
|-----|---------|-----------------------------------------------|----------------------------------------------------------------------------------------------|
| 906 | EK/0045 | Folasade Clinic, Usi Ekiti                    | Irede Estate, Usi Ekiti                                                                      |
| 907 | EK/0047 | Maria Assumptia Catholic Hospital             | Ireje Street, Ikere Road, Ado Ekiti                                                          |
| 908 | EK/0048 | Afolabi Hospital                              | Afolabi Hospital Close off<br>Opopogbooro, Behind Mojere Mkt                                 |
| 909 | EK/0052 | Sanya Clinic                                  | 12 Bamgboye Street, Off Ikere Road,<br>Ado Ekiti                                             |
| 910 | EK/0057 | Ademolawe Memorial Hospital                   | Ikole Ekiti, Ekiti State                                                                     |
| 911 | EK/0058 | Liberty Hospital                              | Block 14 Plot5 Ekiti State Housing<br>Corporation, Ado Ekiti, Ekiti State.                   |
| 912 | EK/0059 | Queens Care Specialist Hospital               | 1 Unity Avenue, UM Iyin Road, Ado<br>Ekiti, Ekiti State.                                     |
| 913 | EK/0060 | Itunuoluwa Medical Centre                     | Gbahun Alore Street Ekute Quarters,<br>Ado Street Ekute Quarters, Ado Ekiti,<br>Ekiti State. |
| 914 | EK/0061 | Potter Family Care Clinic                     | 114 Okela Housing Road Ado Ekiti,<br>Ekiti State                                             |
| 915 | EK/0062 | Olives Specialist Clinics & Fertility Centre. | Plot 5 Tiniola Avenue Ekiti Housing<br>Estate Ado Ekiti, Ekiti State.                        |
| 916 | EK/0063 | Eden Life Hospital                            | Opp. CAC Comprehensive High Umem<br>Avenue Ilawe Road, Ado Ekiti, Ekiti<br>State.            |
| 917 | EK/0064 | Maternal Child Specialist                     | Adebayo Road Ado Ekiti, Ekiti State.                                                         |
| 918 | EK/0065 | College Of Education Health Center            | Ikere Ekiti, Ekiti State                                                                     |
| 919 | EK/0066 | Fola-Mayowa Clinics & Maternity Home          | 41, Ekute Street, Ado Ekiti, Ekiti State.                                                    |
| 920 | EK/0067 | Unique Consultant Hospital                    | Adebayo, Ado Ekiti, Ekiti State                                                              |
| 921 | EK/0068 | Shekinah Group Medical Centre                 | Federal Polytechnic Road Ado- Ekiti,<br>Ekiti State                                          |
| 922 | EK/0070 | Federal University Health Centre, Oye-Ekiti   | Oye-Ekiti                                                                                    |
| 923 | EK/0072 | Kristal Medical Centre                        | No 1, Florence Adedoja Street, Oke Ila<br>Housing Estate, GRA, Ado Ekiti, Ekiti<br>State     |
| 924 | EK/0074 | Heirs Specialist Hospital, Oye Equity         | Madam Aluko's House, Irare Estate,<br>Oye Ekiti, Ekiti State.                                |
| 925 | EK/0075 | Adebayo Memorial Hospital                     | Adebayo Street, off Amvion Road,<br>Otun Ekiti, Ekiti State.                                 |
| 926 | EN/0002 | St. Patricks Hospital & Maternity             | 8, Owerri Road, Asata, Enugu                                                                 |
| 927 | EN/0006 | Christ The King Hospital                      | No. 18 Emeka Abalu Ave. Phase 6,<br>Trans Ekulu, Enugu                                       |
| 928 | EN/0007 | Peenok Medical Centre                         | 24, Zik Avenue, Uwani, Enugu                                                                 |
| 929 | EN/0008 | Dr. Nlogha Okeke Memorial Foundation, Enugu.  | 30, Amigbo Lane Uwani, Enugu                                                                 |
| 930 | EN/0009 | Jeno Hospital Ltd.                            | 23 Nnamdi Azikiwe Avenue, Trans-<br>Ekulu, Enugu                                             |

|     |         |                                                              |                                                                |
|-----|---------|--------------------------------------------------------------|----------------------------------------------------------------|
| 931 | EN/0011 | Michael Obayi Memorial Hospital                              | 49/51, Emmanuel Obayi Avenue, Anyanaeleigbo Achara, Nsukka     |
| 932 | EN/0012 | Cimac Hospital Ltd.                                          | 91, Agbani Road, Enugu.                                        |
| 933 | EN/0013 | Ristela Hospital & Maternity                                 | 3, Ristela Close, Independence Layout, Off Residential Road, E |
| 934 | EN/0015 | Our Saviour Medical Centre                                   | 9th Mile                                                       |
| 935 | EN/0016 | Ntasiobi Hospital,                                           | Enugu                                                          |
| 936 | EN/0017 | Akulue Memorial Hospital                                     | 16/18 Akulue Road, Onuiyi, Nsukka, Enugu                       |
| 937 | EN/0018 | Unity Ngwo Hospital & Mat.                                   | Ngwo, Enugu, Enugu State                                       |
| 938 | EN/0019 | Benem Hospital                                               | Ngwo, Enugu, Enugu State                                       |
| 939 | EN/0024 | Life Foundation Hospital                                     | 3, Agu Street, Achara Layout, Enugu                            |
| 940 | EN/0025 | Ibezim Medical Clinics                                       | 56, Ufuma Street, Achara Layout, Enugu                         |
| 941 | EN/0026 | Kenechukwu Specialist Hospital & Maternity                   | 94, Nike Road, Abakpa, Enugu State                             |
| 942 | EN/0027 | Julius Ezenyirioha Memorial Hospital & Maternity             | 32, Nike Road, Abakpa Nike, Enugu.                             |
| 943 | EN/0028 | Chinwendu Hospital & Maternity                               | 29, Imo River St. Housing Estate, Abakpa, Enugu                |
| 944 | EN/0029 | St. Leo's Specialist Hospital                                | Nike Lake Road, Abakpa, Enugu                                  |
| 945 | EN/0030 | Orient Hospital                                              | Agbani Town, Agbani, Enugu                                     |
| 946 | EN/0031 | Mother Of Mercy Hospital & Mat.                              | Ihe, Awgu Lga, Enugu State                                     |
| 947 | EN/0032 | St. Clara's Maternity Hospital                               | Umonandioгу, Ezeogu Lga, Enugu                                 |
| 948 | EN/0034 | The Merken Hospital Centre                                   | Amechi Road, Awkunanaw, Enugu                                  |
| 949 | EN/0037 | Royal Hospital                                               | 3 Aria Road, Gra, Enugu                                        |
| 950 | EN/0042 | Annuciation Hospital                                         | Emene, Enugu.                                                  |
| 951 | EN/0044 | ESUT Teaching Hospital, Parklane                             | G R A, Enugu                                                   |
| 952 | EN/0046 | Orakwue Hospital                                             | 16 Affa Street, Uwani, Enugu                                   |
| 953 | EN/0102 | University Of Nigeria Teaching Hosp., Enugu                  | Enugu                                                          |
| 954 | EN/0103 | 82 Div Hospital                                              | Enugu, Enugu State                                             |
| 955 | EN/0104 | 337 BSG NAF Medical Centre                                   | NAF Base, Enugu                                                |
| 956 | EN/0105 | Ubabuike Hospital                                            | Enugu                                                          |
| 957 | EN/0107 | Medical Post (AFCSC)                                         | Enugu                                                          |
| 958 | EN/0109 | 103 Bn MRS Enugu                                             | Enugu, Enugu State                                             |
| 959 | EN/0110 | Cottage Hospital/Comprehensive Health Centre, Oji River      | Police College,Oji River, Enugu                                |
| 960 | EN/0111 | Cottage Hospital/Comprehensive Health Centre, Police Detecti | Police Detective College, Enugu                                |
| 961 | EN/0112 | Cottage Hospital/Comprehensive Health Centre                 | Enugu State Police Command, Enugu.                             |
| 962 | EN/0113 | National Orthopaedic Hospital                                | Enugu, Enugu State                                             |
| 963 | EN/0115 | Mayo Hospital                                                | 19, College Road, Ogui New Layout, Enugu                       |
| 964 | EN/0116 | UNN Medical Centre, Enugu                                    | UNEC, Enugu Campus                                             |
| 965 | EN/0117 | Nigeria Law School Medical Centre                            | Agani Town, Enugu                                              |
| 966 | EN/0118 | All Saints Medical Centre                                    | 7 Edemani Road, Nsukka                                         |

|      |         |                                                        |                                                             |
|------|---------|--------------------------------------------------------|-------------------------------------------------------------|
| 967  | EN/0119 | University of Nigeria, Nsukka Medical Centre           | Nsukka, Enugu State                                         |
| 968  | EN/0164 | Mother of Christ Specialist Hospital                   | Ogui, Enugu State                                           |
| 969  | EN/0169 | DSS Clinic                                             | Enugu, Enugu State                                          |
| 970  | EN/0170 | Police Clinics, Enugu                                  | Enugu, Enugu State                                          |
| 971  | EN/0171 | Federal College of Education, Eha-Amufu                | Eha-Amufu, Enugu State                                      |
| 972  | EN/0175 | THE GOOD SHEPHERD SPECIALIST HOSPITAL                  | CHRIST CHURCH STREET, UWANI                                 |
| 973  | EN/0177 | ALPHA SPECIALIST CLINIC                                | 55 NIKE ROAD,ABAKPA, ENUGU                                  |
| 974  | EN/0179 | CHINEMELU HOSPITAL                                     | 88,OGURGURU ROAD,ODENIGBO,NSUKKA                            |
| 975  | EN/0180 | NSUKKA MEDICAL CLINIC                                  | 7, NRU STREET,UGWU-NKWO, NSUKKA                             |
| 976  | EN/0190 | Nigerian Railway Clinic. Enugu                         | Railway Compound, Western Avenue, Enugu                     |
| 977  | EN/0195 | Renaissance Hospital                                   | Isuja, Nsukka                                               |
| 978  | EN/0197 | St Bridget's Specialist Hospi                          | 12 John Okoro Street Emene                                  |
| 979  | EN/0198 | Semino Clinic                                          | 8 Onuayo Street Enugu                                       |
| 980  | EN/0200 | Daberechi Hospital & Maternity                         | 22 College Road, Abakpa, Enugu                              |
| 981  | EN/0201 | Chigozie Hospital & Maternity                          | 11 Ekwulu Lane, Emene                                       |
| 982  | EN/0202 | Elohim Hospital and Maternity                          | 12 Eke Obinagu, Enugu                                       |
| 983  | EN/0203 | NAF Sick Bay                                           | Agbani, Enugu                                               |
| 984  | EN/0205 | Royal Cross Hospital & Maternity                       | 14 TTC Road Nsukka                                          |
| 985  | EN/0206 | The Good Shepherd Hospital                             | 8/10 Iheagu Road NRU Village, Nsukka                        |
| 986  | EN/0213 | St Raphael's Hospital & Mater                          | Ibagwa-Aka, Nsukka                                          |
| 987  | EN/0216 | St Mary's Hospital and Maternity                       | 16 Nwodo Close, GRA, Enugu                                  |
| 988  | EN/0217 | Bishop Shanahan Hospital                               | 46 Enugu Road, Nsukka                                       |
| 989  | EN/0219 | Nwa-Ossai Foundation Hospital                          | 20, Enugu road, Orba, Nsukka                                |
| 990  | EN/0221 | Divine Mercy Hospital& Maternity                       | 32 Orba Road, Nsukka, Enugu State                           |
| 991  | EN/0225 | Kings Court Hospital &Maternity                        | 28,Edenwu street New Haven, Enugu State                     |
| 992  | EN/0226 | Hosanna Hospital &Maternity                            | Nsude,Udi Local Government Area, Enugu state                |
| 993  | EN/0230 | Ekwomibe Memorial Hospital                             | Ngwo, Enugu State                                           |
| 994  | EN/0231 | Faith Foundation Hospital                              | 27B,Ogurugo Road Nsukka,Enugu State                         |
| 995  | EN/0235 | Mount Arafat Hospital                                  | 59,Aku Road Nsukka,Enugu State                              |
| 996  | EN/0236 | Izundu Specialist Medical Centre                       | Izundu Medical Avenue New Site,Oji River Enugu, Enugu State |
| 997  | EN/0237 | Summit Hospital &Maternity                             | Nsukka Road Obollo Afor,Enugu State                         |
| 998  | EN/0238 | Tendercare Hospital & Maternity                        | NO.5B Ezeji Close Ugboezechi,Abakpa,Enugu State             |
| 999  | EN/0242 | Jideofor Hospital                                      | Ikpenwa Flat N.A. Quarters Agwu,Enugu State                 |
| 1000 | EN/0244 | Enugu State Uni Of Science &Tech (ESUT) Medical Centre | Agbani, Enugu State                                         |
| 1001 | EN/0246 | St. Gabriel Hospital(Specialist)                       | 2, fourth Avenue Trans-Ekulu Enugu state                    |



|      |          |                                               |                                                                                                |
|------|----------|-----------------------------------------------|------------------------------------------------------------------------------------------------|
| 1002 | EN/0247  | Mapol 3 Clinic Enugu                          | Agbani Road Awkwnawnaw Enugu State                                                             |
| 1003 | EN/0248  | Calix Healthcare Ltd                          | 10A Hill View Road, ESBS,                                                                      |
| 1004 | EN/0251  | Freedom Fertility Centre                      | No 6 Hill View Avenue, Independent Layout, Enugu, Enugu State                                  |
| 1005 | EN/0252  | Potters Master's Touch Hospital               | 4 Diara Drive, Golf View Layout, Enugu-Onitsha Express Way, Phase V1, Trans Ekulu. Enugu State |
| 1006 | EN/0253  | Keme Hospital                                 | 21 Egbo Nnaji Street, Achara Layout, Enugu, Enugu State                                        |
| 1007 | EN/0254  | Christian Miracle Centre                      | 3 Akutu Crescent, , Independent Lay Out, Enugu State                                           |
| 1008 | EN/0255  | Holy Family Hospital                          | Old Obollo Afor Road, Ohom, Orba Enugu State                                                   |
| 1009 | EN/0256  | Choice Medical Centre                         | 1C Monrovia Street, New Heaven, Enugu State                                                    |
| 1010 | EN/0257  | Marcus Nnadi Memorial Hospital                | 16 University Road, Obollor Afor Enugu State                                                   |
| 1011 | EN/0258  | Chukwuemeka Hospital & Maternity              | Ulanya, Ovoko, Obollo-Nsukka Road, Nsukka Enugu State                                          |
| 1012 | EN/0259  | Bridge View Clinic Ltd                        | 2 Nwodo Street ,Off Ekulu Avenue GRA, Enugu State                                              |
| 1013 | EN/0260  | St. Anthony's Hospital                        | 5 Urban Girls Road, Obechara, Nsukka Enugu State                                               |
| 1014 | FCT/0001 | Wildot Clinic                                 | Plot 903 Obafemi Awolowo Way, Utako District                                                   |
| 1015 | FCT/0002 | Arewa Specialist Hospital & Diagnostic Centre | Plot 645, Alex Ekwueme Street, Jabi District, Abuja                                            |
| 1016 | FCT/0004 | Gwarinpa General Hospital                     | Gwarinpa, Abuja                                                                                |
| 1017 | FCT/0005 | Sybron Medical Centre                         | 25, Mungo Park close, opp Havista Hotel, Asokoro, Abuja                                        |
| 1018 | FCT/0008 | Pan-Raf Hospital Ltd.                         | Nyanya Area C, Abuja                                                                           |
| 1019 | FCT/0010 | Bismol Clinic & Maternity                     | Plot 8, Area F, Nyanya, Abuja                                                                  |
| 1020 | FCT/0011 | St. Patricks, Clinic & Mat.                   | Area F, Beside Police Station, Nyanya Abuja                                                    |
| 1021 | FCT/0012 | Jalingo Medical Clinic                        | Plot 53, Phase li, Opp. Area A, Nyanya Abuja                                                   |
| 1022 | FCT/0013 | Alfad Specialist Medical Centre               | Kuje, FCT, Abuja.                                                                              |
| 1023 | FCT/0014 | Primary Health Clinic, Karonmagaji            | Karonmajigi, Abuja                                                                             |
| 1024 | FCT/0015 | Midland Clinic                                | Karu-Site By Bus Stop, Karu, Abuja                                                             |
| 1025 | FCT/0016 | Divine Mercy Hospital & Diagnostic Centre Ltd | Plot 93, Phase 2/1 Gado Nasko Street, Kubwa, Abuja                                             |
| 1026 | FCT/0017 | The Comforter Clinic & Diag. Centre           | Plot 1233, 1 (R) 4 Road by AMAC International Market behind CBN Quarters Lugbe FHA             |
| 1027 | FCT/0036 | St. Georges Hospital & Maternity              | No. 18 3rd Avenue Gwarimpa li \, Abuja                                                         |

|      |          |                                               |                                                                                          |
|------|----------|-----------------------------------------------|------------------------------------------------------------------------------------------|
| 1028 | FCT/0037 | Unity Clinic                                  | Plot D1 Phase II Site One Gado Nasko Road, Kubwa                                         |
| 1029 | FCT/0038 | Sumit Hospital                                | Bwari                                                                                    |
| 1030 | FCT/0039 | Express Hospital                              | Nyrc Road, Kubwa, Abuja                                                                  |
| 1031 | FCT/0040 | Kings Care Hospital Ltd - Kubwa               | 7, Christmas Road, Behind Police Affairs, Kubwa Abuja                                    |
| 1032 | FCT/0043 | Kubwa Clinic & Maternity                      | Plot159b Kubwa, Behind Channel 8 Restaurant, Kubwa, Abuja                                |
| 1033 | FCT/0044 | Pison Hospital                                | 3553 Gado Nasko Road by MTN office, Phase IV, Kubwa                                      |
| 1034 | FCT/0045 | Miracle Seed Clinic & Maternity               | 40b Dasuki Street, Phase II, Site 2, Kubwa, Abuja                                        |
| 1035 | FCT/0046 | Grace Of God Specialist Med. Centre           | Phase 2, Site 2, Kubwa, Abuja                                                            |
| 1036 | FCT/0047 | Kubwa General Hospital                        | Phase 4 Opp. Gss, Kubwa, Abuja                                                           |
| 1037 | FCT/0049 | St. Vincent Clinic & Maternity                | Daughter's Of Charity, Biyazhin Road, Kubwa                                              |
| 1038 | FCT/0050 | Royal Lords Hospital, Clinics & Maternity Ltd | Plot 107, Zone 4, Dutse Alhaji, Abuja                                                    |
| 1039 | FCT/0073 | Primary Health Centre, Gwagwalada             | Gwagwalada                                                                               |
| 1040 | FCT/0086 | Rhema Foundation Hospital                     | Rhema Fountain, Kwali, Abuja                                                             |
| 1041 | FCT/0087 | Standard Care Hospital & Maternity            | T-Junction Opp. Min. Of Finance, Phase 1, FHA, Lugbe, Airport Road, Abuja                |
| 1042 | FCT/0091 | Maitama District Hospital                     | Maitama Abuja                                                                            |
| 1043 | FCT/0092 | Asokoro District Hospital                     | Asokoro, Abuja                                                                           |
| 1044 | FCT/0093 | Wuse District Hospital                        | Wuse, Abuja                                                                              |
| 1045 | FCT/0095 | Asher Hospital & Maternity                    | Plot 1197, Kataamkpe Cadastral Zone B07, Opp NICON Junction, Berger-Kubwa Express way    |
| 1046 | FCT/0097 | Sauki Private Hospital                        | Plot 90 Zone 6 Yaounde Crescent Wuse                                                     |
| 1047 | FCT/0098 | Leblon Clinic                                 | Opposite Gloryland Nursery & Primary Sch., Behind Gwarinpa Sec. School, Life Camp, Abuja |
| 1048 | FCT/0099 | General Hospital, Nyanya                      | Nyanya, Abuja                                                                            |
| 1049 | FCT/0101 | Al-Bama Clinics & Maternity                   | No. 35 Royal Palm Street, Fed. Housing Estate, Nyanya                                    |
| 1050 | FCT/0102 | Our Lady Of Fatima Catholic Hospital          | Ushafa Rd., Bwari, Abuja                                                                 |
| 1051 | FCT/0103 | Kwali General Hospital                        | Off Abaji/Lokoja Road, Near Area Council Secretariat, Kwali,                             |
| 1052 | FCT/0104 | Abaji General Hospital                        | Abaji, Abuja                                                                             |
| 1053 | FCT/0105 | General Hospital - Karshi                     | Karshi, Abuja                                                                            |
| 1054 | FCT/0106 | Alliance Hospital and Services Ltd            | Plot 801, No. 5 Malumfashi Close off Emeka Anyaoku Street, Garki Area 11                 |
| 1055 | FCT/0107 | Ruz Medical Centre                            | Ubiaja Crescent, Garki, Abuja                                                            |
| 1056 | FCT/0108 | Rouz Hospital & Maternity Limited             | Apo, Legislative Qtrs, Phase II                                                          |
| 1057 | FCT/0109 | Pyramid Medical Centre                        | Plot 1438 Garki II Opp. Nia Cadastral Zone A3 Nnamdi Azikwe                              |

|      |          |                                          |                                                                                 |
|------|----------|------------------------------------------|---------------------------------------------------------------------------------|
| 1058 | FCT/0110 | Amana Medical Centre                     | No. 5, Ilorin Street, off Ogbomosho Street, Area 8, Abuja                       |
| 1059 | FCT/0111 | Fereprod. Medical Centre                 | Off Ahmadu Bello Way Behind Nepa Sub-Station-2 Cbn Area li,                     |
| 1060 | FCT/0112 | Primary Health Centre, Karu              | Karu, Abuja                                                                     |
| 1061 | FCT/0113 | Alpha-Zed Medical Clinic Limited         | Angwar-Gwari, Karu, FCT                                                         |
| 1062 | FCT/0114 | Kuje Primary Health Centre               | Kuje Near Local Govt. Office Kuje, Abuja                                        |
| 1063 | FCT/0115 | Jilf Clinic Ent.                         | Plot D 231 Crescent By 232 Road Kado Estate                                     |
| 1064 | FCT/0116 | Ebony Hospital                           | House No. 76, 3rd Avenue, Gwarinpa Housing Estate, Abuja                        |
| 1065 | FCT/0120 | Limi Hospital & Mat., Ltd.               | Plot 541, Behind Icpc, Central Area, Abuja                                      |
| 1066 | FCT/0122 | National Assembly Clinic                 | Three Arm Zone, Central Area, Abuja                                             |
| 1067 | FCT/0123 | State House Clinic                       | (Presidency) Three Arm Zone, Central Area, Abuja                                |
| 1068 | FCT/0124 | Woman Development Centre, Staff Clinic   | Woman Development Centre, Central Area, Abuja                                   |
| 1069 | FCT/0127 | Sami-Wadata Clinics Ltd.                 | Plot 766 Bukcanan Crescent, Off Aminu Kano Crescent, Wuse II                    |
| 1070 | FCT/0128 | Iduna Specialist Hospital                | Plot 1200 Ndjamena Crescent, Wuse li                                            |
| 1071 | FCT/0131 | Mercy Specialist Hospital & Diag. Centre | Off Aminu Kano Crescent, Plot 619c Zone A7, Wuse II, Abuja                      |
| 1072 | FCT/0132 | Kings Care Hospital - Wuse               | Wuse Zone 4, Abuja                                                              |
| 1073 | FCT/0133 | Capital Hospital                         | 15, Oran Street, by Bank PHB, Off Olusegun Obasanjo way, Abuja                  |
| 1074 | FCT/0136 | CRI Medi Clinics                         | Opp. Peniel Apartment, Off Adetokunbo Ademola Crescent, Wuse                    |
| 1075 | FCT/0138 | Queens Clinics                           | Plot 225, Cotonou Crescent, Wuse Zone 6, Abuja                                  |
| 1076 | FCT/0139 | Bio-Royal Hospital & Maternity Ltd.      | No. 190, Okene/Jebba Close, Garki                                               |
| 1077 | FCT/0140 | INEC Staff Clinic                        | Area 10, Inec Office, Garki                                                     |
| 1078 | FCT/0141 | Holy Trinity Hospital Ltd.               | 27, Oro Ago Crescent, off Muhammadu Buhari Way, Garki II, Abuja                 |
| 1079 | FCT/0143 | Diamond Medical Centre Ltd.              | Plot 42, Beside Mr. Bigs By Model Pri. Sch. Gark li                             |
| 1080 | FCT/0145 | Savannah Hospitals Ltd.                  | Behind City Rock Hotel, Mararaba, Off Nyanya abuja, Km 42, Keffi Road, Mararaba |
| 1081 | FCT/0146 | Crescent Clinic                          | Off Oyo Street, Area 2 Section I, Garki                                         |
| 1082 | FCT/0147 | Dara Medical Clinics                     | Plot 202, Bacita Close, Off Plateau Street, Area 2 , Garki                      |

|      |          |                                                              |                                                                          |
|------|----------|--------------------------------------------------------------|--------------------------------------------------------------------------|
| 1083 | FCT/0149 | Ministry Of Defence Staff Clinic                             | Ship House, Olusegun Obasanjo Way, Area 10, Garki                        |
| 1084 | FCT/0150 | Kinectic Hospital Limited                                    | Ahoda Close, off Emeka Anyaoku street, Area li, Garki                    |
| 1085 | FCT/0151 | Alibu Medical Centre                                         | Area F, Nyanya Abuja                                                     |
| 1086 | FCT/0152 | Lafiak Hospital                                              | Toto Road, Abaji                                                         |
| 1087 | FCT/0153 | Gwagwalada Clinic & Maternity                                | Kutunku Along Frcn Road, Abuja                                           |
| 1088 | FCT/0154 | Jerab Hospitals                                              | Plot 145, Kutunku Near Radio House, Gwagwalada, Abuja                    |
| 1089 | FCT/0155 | Sliver Fountain Medical Centre                               | Kukwala District, Opp. Kuchingoro, Along Airport Road, Abuja             |
| 1090 | FCT/0156 | Rapha Hospital And Maternity                                 | Phase Iii, Near Giwa Hotel, Jikwoyi, Abuja                               |
| 1091 | FCT/0157 | Arewa Clinic & Maternity - Karu                              | Plot F14, By Nepa Office, Karu                                           |
| 1092 | FCT/0158 | Nisa Premier Hospital                                        | Plot 618, Alex Ekweme Way, Jabi Abuja                                    |
| 1093 | FCT/0159 | Abuja Clinic - Maitama                                       | Maitama, Abuja                                                           |
| 1094 | FCT/0330 | National Hospital Abuja                                      | Central Area                                                             |
| 1095 | FCT/0333 | Albert Horsfall Med. Centre                                  | NIA Hq, off Muritala Mohammed way, near Danata & Sawoe, Garki            |
| 1096 | FCT/0334 | Defence Intelligence Agency                                  | Asokoro                                                                  |
| 1097 | FCT/0335 | Revenue Mobilization & Fiscal                                | 210 Tafawa Balewa Way, Central Area, Garki                               |
| 1098 | FCT/0336 | Living Stream Specialist Hospi                               | 43/45, Street A, Phase I, off University Rd, Gwagwalada                  |
| 1099 | FCT/0337 | Angelic Care Hospital & Mat.                                 | 19, Ngwa close off Funmilayo Ransome Kuti Road, Garki Area 3, Abuja      |
| 1100 | FCT/0340 | DSS Medical Centre.                                          | VGC, Opposite National Military Cemetary, Airport Road, Abuja            |
| 1101 | FCT/0343 | Nigeria Customs Service Clinics - Wuse                       | Wuse Zone 3, Abuja                                                       |
| 1102 | FCT/0344 | Nigeria Customs Service Med. Centre - Karu                   | Karu Customs Barracks, Abuja                                             |
| 1103 | FCT/0345 | Guards Brigade Med. Centre                                   | Yakubu Gowon Barracks, Abuja                                             |
| 1104 | FCT/0346 | 108 Nigerian Air Force Hospital Abuja                        | 108 Nigerian Air Force Hospital Abuja                                    |
| 1105 | FCT/0347 | Cornerstone Specialist Hospital                              | Plot 1397, Abidjan Street, Zone 3, Wuse, Abuja                           |
| 1106 | FCT/0350 | City Hospital                                                | Wuse Zone 5, Abuja                                                       |
| 1107 | FCT/0357 | Bwari General Hospital                                       | Kawu Road, Bwari, FCT, ABuja                                             |
| 1108 | FCT/0359 | Abuja Cliniic, Garki                                         | Area 3, Garki, Abuja                                                     |
| 1109 | FCT/0360 | Abuja Cliniic - Karu                                         | Karu, Abuja                                                              |
| 1110 | FCT/0362 | G & S Specialist Clinic                                      | 8B Rhine Street (Opp. IBB Way), Maitama                                  |
| 1111 | FCT/0366 | Saffron Hospital Ltd.                                        | 1 KM, Left Off Checkpoint, Abuja-Keffi Expressway, Phase IV, Nyanya, FCT |
| 1112 | FCT/0370 | Medical Centre (Council of Legal Education) Nigerian Law Sch | Nigerian Law School, Bwari, P.M.B. 170, Garki, Abuja                     |

|      |          |                                                              |                                                                                     |
|------|----------|--------------------------------------------------------------|-------------------------------------------------------------------------------------|
| 1113 | FCT/0371 | 4 Bn MRS Abuja                                               | Abuja                                                                               |
| 1114 | FCT/0372 | NWC MIR Abuja                                                | Abuja                                                                               |
| 1115 | FCT/0374 | Force Headquarters Hospital                                  | Force Headquarters, Abuja                                                           |
| 1116 | FCT/0376 | Sick bay NHQ                                                 | NN HQ, Abuja                                                                        |
| 1117 | FCT/0377 | DHQ MRS                                                      | Mogadishu Cantonment, Abuja                                                         |
| 1118 | FCT/0378 | Horizons Medical Centre                                      | Plot 777 Bouake Street Wuse Zone 6, Abuja                                           |
| 1119 | FCT/0379 | Bepos Clinic & Maternity                                     | 10, Faskari Street Area 3 Garki Abuja                                               |
| 1120 | FCT/0380 | ICPC Staff Clinic                                            | Plot 802 Constitution Ave Central Area Abuja                                        |
| 1121 | FCT/0381 | National Commission for Colleges of Education (NCCE) Staff C | NCCE Management Staff Quarters Mabushi Wuse II Abuja                                |
| 1122 | FCT/0382 | Kefat Medical Centre                                         | No 5 Damaturu Close, Behind Mr.Biggs, FHA, Gwarinpa                                 |
| 1123 | FCT/0385 | Well Point Clinic                                            | House 1, Road 45, Off 1st Ave, Gwarinpa                                             |
| 1124 | FCT/0386 | The Crown Hospital Ltd.                                      | Behind Police quarters, Gwagwa, Abuja                                               |
| 1125 | FCT/0387 | Ronella Specialist Hospital                                  | 51 Crescent Road, Flat 3, Phase IV, Kubwa, Abuja                                    |
| 1126 | FCT/0389 | Rainbow Clinic & Maternity                                   | Plot 218, Gudu District Apo Qtrs Garki, Abuja                                       |
| 1127 | FCT/0390 | Federal Staff Hospital - Jabi                                | Airport Road, Jabi                                                                  |
| 1128 | FCT/0391 | Everlasting Care Hospital Limited                            | Plot 643 Gimbia Street, Area II, Garki, Abuja                                       |
| 1129 | FCT/0392 | Micheal Cross Specialist Hospital                            | Plot FG Church Road, Karu Site, Karu, Abuja                                         |
| 1130 | FCT/0393 | Convenant Clinic & Maternity                                 | Anygba Street Opp NTA Area 11 Garki                                                 |
| 1131 | FCT/0394 | St Mary Catholic Hospital, Gwagwalada                        | No 1 FRCN Road, Opposite Police Station Gwagwalada                                  |
| 1132 | FCT/0395 | Precious Clinic & Maternity                                  | House 57, 1st Avenue FHA, Lugbe, Abuja                                              |
| 1133 | FCT/0396 | Kutunku Alheri Clinic & Maternity Ltd                        | Along New Millenium Hotel, P.O Box, 7, New Kutun-Gwagwalada                         |
| 1134 | FCT/0397 | Abuja Unity Hospital & Maternity, Lugbe                      | FHA Phase I Lugbe                                                                   |
| 1135 | FCT/0398 | Agnes Maternity Home                                         | Opp Old Block Industries Near Over Head Water Tank Lugbe                            |
| 1136 | FCT/0399 | Sophy Hospital & Maternity                                   | Jukwoyi-Karshi Rd, Jukwoyi, Phase II                                                |
| 1137 | FCT/0400 | St Luke"s Clinic & Lab                                       | Plot 838 FHA 2, Karu                                                                |
| 1138 | FCT/0425 | Kuje General Hospital                                        | Kuje, Abuja.                                                                        |
| 1139 | FCT/0454 | Kela Clinics & Maternity Ltd.                                | Beside Lutheran Church, Opp. Phase II Primary Sch., Along Keffi Road, Nyanya, Abuja |
| 1140 | FCT/0472 | Dr. Hassans Clinic/Diagnostic Centre                         | 9 Njamena Street, off Aminu Kano Crescent, Wuse II, Abuja                           |
| 1141 | FCT/0476 | St. Peters Catholic Hospital                                 | Abuja-Lokoja Road, Abaji, Abuja                                                     |

|      |          |                                                       |                                                                                         |
|------|----------|-------------------------------------------------------|-----------------------------------------------------------------------------------------|
| 1142 | FCT/0477 | City International Clinics                            | Kabayi, Mararaba, Nasarawa State                                                        |
| 1143 | FCT/0478 | University of Abuja Teaching Hospital,<br>Gwagwalada  | Abuja                                                                                   |
| 1144 | FCT/0479 | Conita Clinic & Maternity, Dagiri                     | Beside Dagiri Primary School,<br>Gwagwalada, Abuja                                      |
| 1145 | FCT/0481 | N - Foundation Hospital                               | No. 2 Amesi Street, Behind Redeemed<br>Church of God, Kuje, Abuja                       |
| 1146 | FCT/0482 | Maraba Clinic & Maternity                             | Behind Bank of the North,<br>Gwagwalada, Abuja                                          |
| 1147 | FCT/0483 | Mumeen Medical Centre                                 | Wodi Shopping Village, Behind Old<br>Motor Park (NARTO Motor Park)<br>Gwagwalada, Abuja |
| 1148 | FCT/0484 | DSS Clinic, Bwari                                     | (ISS), Usuma Dam - Bwari, FCT, Abuja                                                    |
| 1149 | FCT/0485 | National War College, Ushafa Camp Clinic              | Ushafa, NWC Camp, Bwari LGA, Abuja                                                      |
| 1150 | FCT/0486 | Federal Road Safety Commission Medical Centre         | Plot 18 Cotonou Crescent, Wuse Zone<br>6, Abuja                                         |
| 1151 | FCT/0488 | National Centre for Women Development Staff<br>Clinic | Central Area, Garki                                                                     |
| 1152 | FCT/0489 | Roma Clinic & Maternity                               | 12B Subeiru Crescent, Gbazango,<br>Kubwa, Abuja                                         |
| 1153 | FCT/0490 | J. Ugonma Hospital Ltd.                               | 153 Extension, Old Maitama, Kubwa                                                       |
| 1154 | FCT/0491 | Freedom Hospital & Health Consultants                 | 405 Phase III Road, Kubwa                                                               |
| 1155 | FCT/0492 | Alpha Clinic                                          | 332 Alpha Clinic Zone 1, Dutse Alhaji,<br>Abuja                                         |
| 1156 | FCT/0493 | Gideon Legacy Hospital Limited                        | Along Nitel Road, Zone 5, Dutse Alhaji,<br>Abuja                                        |
| 1157 | FCT/0494 | Divine Winner Medical Center                          | First Gate Along Police Station Road,<br>Dutse Alhaji, Abuja                            |
| 1158 | FCT/0495 | Allied Surgery                                        | Off Specialist Hospital Road, Behind<br>Charismatic Revival Church,<br>Gwagwalada       |
| 1159 | FCT/0498 | NIPRID Staff Clinic                                   | NIPRID, Idu, Abuja                                                                      |
| 1160 | FCT/0499 | Faith Medical Centre                                  | Old Karimo Along Dantata Road,<br>Abuja                                                 |
| 1161 | FCT/0500 | JEDONEC Clinic & Maternity                            | 9, Abdulkadir Babagba Street, Works<br>& Housing Phase II, Gwarinpa, Abuja              |
| 1162 | FCT/0502 | Quality Care Clinic                                   | Dawaki Extension, Behind News<br>Engineering, off Gwarinpa Estate,<br>Abuja             |
| 1163 | FCT/0503 | Accolade Medical Clinic Limited                       | Flat 5 Block 1 Kujama Street, behind<br>Shopping Center, Area 2, Garki Abuja            |
| 1164 | FCT/0506 | Rachel Hospital                                       | Plot 23, Onitsha Street, Off Gimbiya,<br>Garki, Abuja                                   |

|      |          |                                            |                                                                   |
|------|----------|--------------------------------------------|-------------------------------------------------------------------|
| 1165 | FCT/0507 | N & S Clinic & Maternity                   | Area C Junction, Nyanya, Abuja                                    |
| 1166 | FCT/0508 | PAAFAG Hospital & Medical Diagnosis Centre | FHA Lugbe FHA Estate, Lugbe, Abuja                                |
| 1167 | FCT/0510 | Northland Medical Centre                   | Okata House Off Old Karu Road, Nyanya, Abuja                      |
| 1168 | FCT/0511 | Bwari Medical Centre                       | Bwari, Abuja                                                      |
| 1169 | FCT/0512 | Bethel Dental Clinic                       | Nwora Plaza, Plot 1103 Aminu Kano Crescent, Wuse II, Abuja        |
| 1170 | FCT/0542 | Capital Doctors Clinics & Maternity        | ECWA Church Road, Pasali, Kuje, Abuja                             |
| 1171 | FCT/0543 | Diamond Crest Hospital Ltd                 | Opp. Fed. High Court, Zuma, Abuja                                 |
| 1172 | FCT/0546 | Garki Hospital                             | Area 8, Garki, Abuja                                              |
| 1173 | FCT/0549 | Allison Clinic & Maternity                 | Off Prison Road, Pasali, Kuje, FCT                                |
| 1174 | FCT/0550 | Hillcrest Clinics                          | 19 Orau Street Off Nouakchott Street Wuse Zone 1                  |
| 1175 | FCT/0552 | Dave Vivian Hospital and Maternity         | Behind Shining Star Nursery & Primary School Kubwa                |
| 1176 | FCT/0554 | Hi-Fi Clinics                              | 40 Suez Crescent, Ibrahim Abacha Estate Wuse Zone 4               |
| 1177 | FCT/0556 | Fill Medical Centre                        | Plot 9 Gado Nasco Road, Phase II site II Kubwa                    |
| 1178 | FCT/0559 | Police Hospital                            | Behind Area 1 Shopping Complex, Area 1 Garki                      |
| 1179 | FCT/0562 | Allison Clinic & Maternity                 | Off Prison Road, Pasali, Kuje                                     |
| 1180 | FCT/0563 | Fortress Hospital                          | 8 Gender Close, Off Gender Street, Wuse Zone 1                    |
| 1181 | FCT/0566 | St George's Clinic                         | Sector F Corner Shop, Federal Housing Estate, Airport Road, Lugbe |
| 1182 | FCT/0568 | University of Abuja Medical Centre, Abuja  | GWAGWALADA LGA                                                    |
| 1183 | FCT/0571 | Kapital Hospital and Maternity Ltd         | 29 Yaounde Street, Zone 6, Wuse                                   |
| 1184 | FCT/0573 | Kelina Medical Center                      | 116, 3rd Avenue, Gwarinpa Estate                                  |
| 1185 | FCT/0575 | Clinic Care Medical Services               | 35 Nouakchott Street, Wuse Zone 1                                 |
| 1186 | FCT/0582 | AHQ Clinic                                 | Abuja                                                             |
| 1187 | FCT/0583 | NAF Sick Bay                               | Abuja                                                             |
| 1188 | FCT/0584 | Sisters of Nativity Hospital               | Jikwoyi Phase 1, Behind Asaka Cement                              |
| 1189 | FCT/0586 | Pogma Clinic & Maternity                   | Behind Aso Savings and Loans, Jikwoyi Phase 3                     |
| 1190 | FCT/0589 | Living Rock Hospital                       | Behind High Court, Zuba                                           |
| 1191 | FCT/0590 | Promesa Medical Centre                     | House 57, 321 Road off 3rd Avenue, Gwarinpa                       |
| 1192 | FCT/0593 | Lifeway Medical Centre                     | 60 Harper Street, Wuse Zone 7                                     |
| 1193 | FCT/0595 | Kubwa Muslim Community Hospital (KMC)      | Phase 4, Opposite Jumat Mosque Kubwa                              |
| 1194 | FCT/0596 | Jikwoyi Medical Centre                     | 3 Esu Jetta Road, Phase 1, Jikwoyi                                |
| 1195 | FCT/0597 | Wamakko Hospital and Maternity             | Plot 490 Cadastral Zone C2 Gwarinpa 1                             |

|      |          |                                            |                                                                                                                |
|------|----------|--------------------------------------------|----------------------------------------------------------------------------------------------------------------|
| 1196 | FCT/0598 | Crystal Paediatric Clinic Limited          | 1, Ikot Ekpene street, opposite National Assembly Clinic, Area 11, Garki                                       |
| 1197 | FCT/0599 | AJ Lifetime Hospital and Maternity Limited | 1 Korinya Street off Gado Nasco, Kubwa                                                                         |
| 1198 | FCT/0600 | Royal Specialist Hospital                  | 2 Kukawa Street, off Gimbiya Street, Area 11, Garki                                                            |
| 1199 | FCT/0601 | Tolbert Specialists Hospitals Ltd          | 3 Substation Close off Constitution Avenue, Gaduwa Estate                                                      |
| 1200 | FCT/0603 | RF Hospital                                | Zone A, Relocation Estate, Gidan Mangoro                                                                       |
| 1201 | FCT/0604 | Jethrone Hospital and Diagnostic Centre    | Plot 44, NYSC Road, Gbazango                                                                                   |
| 1202 | FCT/0605 | Well Care Clinics                          | Opp. Abattoir, FRCN Road, Gwagwalada                                                                           |
| 1203 | FCT/0607 | Kenony Clinic Limited                      | Plot B144 Adisa Close 2/2 ?Off Dasuki Road, Kubwa                                                              |
| 1204 | FCT/0608 | Peacecare Clinic                           | 46 3rd Avenue, Opp. Zenith Bank, Gwarinpa                                                                      |
| 1205 | FCT/0609 | View Point Hospital                        | 4 Sunday Awoniyi Street, 3rd Avenue, near MIB Plaza, Gwarinpa                                                  |
| 1206 | FCT/0610 | Rubochi General Hospital                   | Rubochi Town                                                                                                   |
| 1207 | FCT/0611 | Samto Medical Services                     | 4th/2nd Avenue, Supreme Court Quarters, Karu                                                                   |
| 1208 | FCT/0612 | Family Care Multiclinics                   | 9, Lord Lugard Street, Asokoro                                                                                 |
| 1209 | FCT/0613 | Primecare Hospitals                        | Plot 75, Road 321 off 3rd Avenue by Haman Maiduguri Crescent, Gwarinpa                                         |
| 1210 | FCT/0614 | Wellington Clinics Limited                 | 10 Vanem Street, off Euphrates Street, Maitama                                                                 |
| 1211 | FCT/0615 | Vintage Medical Centre                     | F Road, CITEC Estate, Mbora District                                                                           |
| 1212 | FCT/0618 | Henry Akingba Medical Center               | Prisons Village, Bill Clinton Drive, along Airport Road                                                        |
| 1213 | FCT/0619 | Medimax Hospital                           | 11, 612 Road (7th Avenue) Gwarinpa                                                                             |
| 1214 | FCT/0622 | Socu Hospital                              | Ungwan Dogo Street, off Transformer Bus Stop, Ngwa Dogo, Orozo                                                 |
| 1215 | FCT/0623 | Nizamiye Hospital Limited                  | Plot 113 Sector S, Cadastral Zone, Life Camp                                                                   |
| 1216 | FCT/0624 | Micelo Clinics                             | 33/35 Obafemi Awolowo Street, Phase 1, Trademore Estate via VON, Lugbe                                         |
| 1217 | FCT/0625 | Laura Hospital                             | Kogo, Bwari                                                                                                    |
| 1218 | FCT/0628 | First Call Hospital & Diagnostic Center    | Plot 167, Cadastral Zone B09, Beside Lakeview Homes, Phase 2, Kado-Karshi along New GwarinpaBanex Express Road |



|      |          |                                                |                                                                                 |
|------|----------|------------------------------------------------|---------------------------------------------------------------------------------|
| 1219 | FCT/0631 | Aviation Medical Clinic                        | Nnamdi Azikwe Airport                                                           |
| 1220 | FCT/0632 | Camp Medical Centre                            | Regional Market, Dei-Dei, Beside First Bank                                     |
| 1221 | FCT/0635 | Lifeway Trinity Clinic & Maternity             | Plot 6, House 2, Behind Deeper Life Bible Church, Phase 4, Jikwoyi              |
| 1222 | FCT/0636 | Vinette Hospital & Maternity                   | 14, Gindiri Street, Garki 2                                                     |
| 1223 | FCT/0638 | EFAB Medical Centre                            | 28, 2nd Avenue (Adjacent to Mosque) RFAB City Estate, Mbora 1, Life Camp        |
| 1224 | FCT/0639 | Zenith Medical and Kidney Centre               | 28 Ubiaja Crescent, Garki 2                                                     |
| 1225 | FCT/0644 | Massan Health Clinic                           | Road 1, Flat 16, Near Ajis Prime Resort, Lugbe F.H.A, Abuja                     |
| 1226 | FCT/0645 | Open Healthcare Ltd                            | 11, Ademola Awosika Road, Kubwa Ext. 3, off Bwari-Dutse Expressway, Abuja       |
| 1227 | FCT/0650 | Salama Infirmary Hospital and Maternity        | No 24, 64 crescent, After Chaley Boy Boulevard, Gwarinpa                        |
| 1228 | FCT/0651 | Chivar Clinics and Urology Center              | 30, Agadez street, off Aminu Kano crescent, Wuse 2, Abuja                       |
| 1229 | FCT/0652 | Zikora Hospital                                | Polt 16A, End of 69 road (Off 6th Avenue - Galadima Estate) Gwarinpa, Abuja     |
| 1230 | FCT/0653 | Primus International Super Specialist Hospital | Karu New Extension, Behind Customs Quarters, Karu, Abuja                        |
| 1231 | FCT/0654 | Irefa Hospital Ltd                             | Opp Ave Maria Boy's College, Nyanya, Phase IV, Abuja FCT                        |
| 1232 | FCT/0655 | Penthouse Clinics Ltd                          | Plot 170, Kado Karimu Rd, after Kado Fish Market, Abuja – FCT.                  |
| 1233 | FCT/0656 | AT- Taqwa Clinic & Maternity Ltd               | Plot 653, Zone 303, Adjacent Family Worship Centre, Wuye District, Abuja-FCT.   |
| 1234 | FCT/0657 | Fountain sides Hospital                        | Plot 73A 1st Avenue opp. Bonny B Corner Shop Gwarimpa Abuja                     |
| 1235 | FCT/0658 | Cedacrest Hospital                             | Plot 195 Apo-Dutse way off. Oladipo Diya way, by Amina Court Estate, Gudu Abuja |
| 1236 | FCT/0659 | Cornelian Maternity & Rural Healthcare Centre  | Holy Child Lane, Opposite Loyola Jesuit Maingate, Gidan Mangoro, Abuja-FCT.     |
| 1237 | FCT/0660 | Icon Eye Clinic                                | Suite B16, Shakir Plaza, by Assemblies of God, Area 11, Garki, Abuja, FCT       |
| 1238 | FCT/0661 | Samrock Hospital                               | Plot 1013-1014 Army Post Service Scheme, Kurudu                                 |
| 1239 | FCT/0662 | Gilgal Hospital                                | Plot 1013-1014 Army Post Service Scheme, Kurudu, FCT                            |
| 1240 | FCT/0663 | Zaman Clinic & Maternity                       | 25 Road 21B, Babangida Rd. FHA, Lugbe, Abuja                                    |

|      |          |                                                              |                                                                                                                 |
|------|----------|--------------------------------------------------------------|-----------------------------------------------------------------------------------------------------------------|
| 1241 | FCT/0665 | Vic-James Hospital                                           | Plot 211, Cadastral Zone 07-05, Gbazango Extension, Kubwa, Abuja                                                |
| 1242 | FCT/0667 | Nigerian Security and Civil Defence Corps Medical Center     | Sauka Academy (Beside Immigration Passport Office), off Airport Road, Abuja.                                    |
| 1243 | FCT/0668 | Life Point Medical Center                                    | Plot 64, Moses Majekodummi Crescent, Utako District, Abuja                                                      |
| 1244 | FCT/0670 | Ila Universal Hospital                                       | Plot MFI, AAI Layout, Along FUNTAJ International School, Kuje                                                   |
| 1245 | FCT/0672 | Marie Stopes Clinic                                          | Plot 233 FHA Estate, After Corner Shop, (Opposite Custom Clinic), Phase 1, Karu-Site, FCT                       |
| 1246 | FCT/0673 | Modern Health Hospital                                       | Plot 506, Excellence and Friends Street, Off Arab Road, Kubuwa Extension 2, After Dunamis Church, Kubuwa, Abuja |
| 1247 | FCT/0674 | Louis-Pastuer Hospital LTD                                   | 813C, 64 Crescent, Gwarinpa 2 Estate, Map Global Junction, Abuja                                                |
| 1248 | FCT/0676 | LeahJada-Joseph Medical Centre                               | Plot 7, Chris Chukwukelu Street, Behind Central Mosque, Gwagwalada, F.C.T                                       |
| 1249 | FCT/0678 | Healthland Hospital and Diagnostic Centre                    | Plot 12, Sauki Extension, Off FCMB, Kuje, F.C.T                                                                 |
| 1250 | FCT/0679 | Jehova Adonai Eagle Hospital                                 | 314, Street B, Phase 1, Gwagwalada, F.C.T                                                                       |
| 1251 | FCT/0680 | Joyland Medical Centre & Children Hospital                   | Main Close, Valencia Garden Estate, Dakwo District, F.C.T                                                       |
| 1252 | FCT/0681 | The Central Clinic                                           | 1, Sakete Close, Kampala Street, Wuse II, Abuja                                                                 |
| 1253 | FCT/0685 | LeahJada-Joseph Medical Centre                               | Plot 7, Chris Chukwukelu Street, Behind Central Mosque, Gwagwalada, F.C.T                                       |
| 1254 | FCT/0688 | Maida Hospital                                               | 94, 43rd Crescent, Off 4th Avenue, Gwarinpa, Abuja                                                              |
| 1255 | FCT/0690 | Nigeria Atomic Energy Commission Staff Clinic                | SHETCO Complex, Sheda, F.C.T                                                                                    |
| 1256 | FCT/0695 | Guinea Savannah Medical Center                               | Communal Center, NNPC Housing Estate Area 2, Garki                                                              |
| 1257 | FCT/0697 | MD Abubakar Hospital                                         | Police Baracks, Dei-Dei                                                                                         |
| 1258 | FCT/0698 | Police Cantonment Clinic                                     | Area 11, Garki Abuja                                                                                            |
| 1259 | FCT/0699 | De Rose Of Sharon Hospital & Maternity Jikwoyi Abuja Limited | Abuja                                                                                                           |
| 1260 | FCT/0702 | Happy Eye Vision Clinic.                                     | 40 Suarez Crescent, Ibrahim Abacha Estate Wuse Zone 4 Abuja FCT.                                                |

|      |          |                                                |                                                                                                    |
|------|----------|------------------------------------------------|----------------------------------------------------------------------------------------------------|
| 1261 | FCT/0704 | White dove Hospital                            | AA3 Quarters Extension, New Enal International School, Kuje F.C.T                                  |
| 1262 | FCT/0705 | Standard care Medical Centre                   | Ishaya Ikwo Ibrahim Road, Navy Estate Junction, Karshi, Abuja F.C.T                                |
| 1263 | FCT/0707 | Martin Luther- Obama Specialist Hospital.      | 51, Yellow House, Loyola Street, Opp. Loyola Jesuit College Staff Gate, Gidan Mangoro, Abuja F.C.T |
| 1264 | FCT/0711 | Modelcare Hospital                             | 5, Jaba Close Off Dunukofia Str. By FCDA Minister`s Gate, Garki Area 11, Abuja F.C.T               |
| 1265 | FCT/0712 | Vecad Clinic Ltd                               | 4 Umuahia Close, Off Emeka Anyaoku Str. Garki Area 11 F.C.T                                        |
| 1266 | FCT/0714 | First Hospital And Maternity LTD               | Jikwoyi- Karshi Express Way, Opp. Old Timber Shed, Jikwoyi, Abuja F.C.T                            |
| 1267 | FCT/0716 | Freedomscan Medical Centre                     | Area B, Last Road, Nyanya, Abuja F.C.T                                                             |
| 1268 | FCT/0718 | Hammersmith Medical Centre                     | No 10, Justice Okeke Street, Trademore Estate Phase 3, Lugbe, Abuja F.C.T                          |
| 1269 | FCT/0722 | Fountain Trust Medical & Diagnostic Centre Ltd | No. 6 Pastor Enoch Adeboye Street Off 24 Crescent, 2nd Avenue Gwarimpa Estate, Abuja F.C.T         |
| 1270 | FCT/0724 | Jedam Spring Hospital Limited                  | Plot 528, Family Along Funtaj Rd. Kuje F.C.T                                                       |
| 1271 | FCT/0725 | Community Hospital & Diagnostic Centre         | Plot 342 Kubwa Extension 111 Dutse Alhaji Abuja F.C.T                                              |
| 1272 | FCT/0726 | Kodesh Hospital LTD                            | Close 5, Phase2, Army Housing Estate, Kurudu, Abuja. F.C.T                                         |
| 1273 | FCT/0728 | Yalen Medical Services Nigeria Limited         | Yalen Medical Services Nigeria Limited                                                             |
| 1274 | FCT/0730 | Menovas Consultants Clinic                     | Plot 53 Road B, Bentell Villa Estate Gaduwa District, Abuja F.C.T                                  |
| 1275 | FCT/0731 | Yabisam Hospital                               | 2 Hidu Road Angwan – Tiv, Tudun Wada Behind FHA Lugbe, Abuja FCT                                   |
| 1276 | FCT/0732 | Jodi Medical Center                            | 2 Almurie Omanze Street, Off Ladoke Akintola Boulevard, Garki 2, Abuja F.C.T                       |
| 1277 | FCT/0734 | Life Medical Spa And Specialist Centre.        | 8,Justice Mohammed Bello Street Asokoro Abuja F.C.T                                                |
| 1278 | FCT/0739 | Premier Heart Hospital and Clinics             | 45 Fourth Avenue F.H.A Gwarimpa Abuja                                                              |
| 1279 | FCT/0742 | Tahira Hospital                                | Block D2 F.C.D.A Estate Kubwa. Abuja F.C,T                                                         |

|      |         |                                       |                                                                                                  |
|------|---------|---------------------------------------|--------------------------------------------------------------------------------------------------|
| 1280 | GM/0001 | General Hospital Billiri              | Along Yola Road,Gombe                                                                            |
| 1281 | GM/0002 | Federal Teaching Hospital, Gombe      | Gombe                                                                                            |
| 1282 | GM/0003 | Doma Hospital                         | 5. Commercial Area,Gombe                                                                         |
| 1283 | GM/0004 | Miyelti Hospital                      | A.Y. Guest House, Dukku Road                                                                     |
| 1284 | GM/0005 | Yarma Memorial Hospital               | Buba Shongo Quarters,Gombe                                                                       |
| 1285 | GM/0006 | Bajoga General Hospital               | Funakaye Lga                                                                                     |
| 1286 | GM/0007 | Dadin Kowa Primary Health Centre      | Gombe                                                                                            |
| 1287 | GM/0009 | Musaba Medical Centre                 | Dukku Road                                                                                       |
| 1288 | GM/0010 | Hamdala Specialist Clinic             | Near Pantami Stadium,Gombe                                                                       |
| 1289 | GM/0011 | Salem Medical Centre                  | Pantami                                                                                          |
| 1290 | GM/0012 | Metro Consultants                     | Federal Low Cost Housing Estate,<br>along Goodluck Jonathan rd, near All<br>Saint College, Gombe |
| 1291 | GM/0013 | Sabana Specialist Hospital Ltd.       | Federal Lowcost, Gombe                                                                           |
| 1292 | GM/0014 | Specialist Hospital, Jekadafari       | Jekadafari                                                                                       |
| 1293 | GM/0025 | General Hospital, Kaltungo            | Kaltungo,Along Yola Road, Gombe                                                                  |
| 1294 | GM/0026 | Kumo General Hospital                 | Kumo L.G.A                                                                                       |
| 1295 | GM/0028 | Bimma Med. Centre                     | Fed. Lowcost, Gombe                                                                              |
| 1296 | GM/0036 | General Hospital Dukku                | Dukku Town                                                                                       |
| 1297 | GM/0037 | General Hospital Zambuk               | Zambuk Town                                                                                      |
| 1298 | GM/0045 | DSS Clinic                            | Gombe, Gombe State                                                                               |
| 1299 | GM/0046 | Police Clinics, Gombe                 | Gombe State                                                                                      |
| 1300 | GM/0047 | Yambu Dok Clinic                      | Billiri, Gombe State                                                                             |
| 1301 | GM/0060 | Panda Maternity Clinic                | Panda                                                                                            |
| 1302 | GM/0067 | Gadawo Health Clinic                  | Gadawo                                                                                           |
| 1303 | GM/0068 | Jabba Health Clinic                   | Jabba                                                                                            |
| 1304 | GM/0069 | Kalshingi Health Clinic               | Kalshingi                                                                                        |
| 1305 | GM/0070 | Tabra Maternity Clinic                | Tabra                                                                                            |
| 1306 | GM/0071 | Akko Health Clinic                    | Akko                                                                                             |
| 1307 | GM/0072 | Zongomari Health Clinic               | Zongomari                                                                                        |
| 1308 | GM/0073 | Bula Health Clinic                    | Bula                                                                                             |
| 1309 | GM/0074 | Lawanti Health Clinic                 | Lawanti                                                                                          |
| 1310 | GM/0075 | Shongo Health Clinic                  | Shongo                                                                                           |
| 1311 | GM/0076 | Tumu Health Clinic                    | Tumu                                                                                             |
| 1312 | GM/0077 | Pindiga Health Clinic                 | Pindiga                                                                                          |
| 1313 | GM/0078 | Chilo Family Support Maternity Clinic | Chilo                                                                                            |
| 1314 | GM/0079 | Yarima Shehu Maternity Clinic         | Akko                                                                                             |
| 1315 | GM/0080 | Goma Health Clinic                    | Goma                                                                                             |
| 1316 | GM/0081 | Tukulma Maternity Clinic              | Tukulma                                                                                          |
| 1317 | GM/0082 | Maiganga Maternity Clinic             | Maiganga                                                                                         |
| 1318 | GM/0083 | Kundullum Dispensary                  | Kundullum                                                                                        |
| 1319 | GM/0084 | Garko Dispensary                      | Garko                                                                                            |
| 1320 | GM/0085 | Kaltanga Dispensary                   | Kaltanga                                                                                         |
| 1321 | GM/0086 | Piyau Dispensary                      | Piyau                                                                                            |
| 1322 | GM/0087 | Zabin Kani Dispensary                 | Zabin-Kani                                                                                       |
| 1323 | GM/0088 | Kembu Dispensary                      | Kembu                                                                                            |
| 1324 | GM/0089 | Wurodole Dispensary                   | Wurodole                                                                                         |
| 1325 | GM/0090 | Badara Dispensary                     | Badara                                                                                           |
| 1326 | GM/0091 | Tulmi Dispensary                      | Tulmi                                                                                            |

|      |         |                                             |                                                             |
|------|---------|---------------------------------------------|-------------------------------------------------------------|
| 1327 | GM/0092 | Gokaru Dispensary                           | Gokaru                                                      |
| 1328 | GM/0093 | Lombo Dispensary                            | Lombo                                                       |
| 1329 | GM/0094 | Tambie/Yolo Dispensary                      | Tambie                                                      |
| 1330 | GM/0095 | Birnin Bolawa Primary Health Clinic         | Birnin Bolawa                                               |
| 1331 | GM/0096 | Birnin Fulani Primary Health Clinic         | Birnin Fulani                                               |
| 1332 | GM/0097 | Barwo Nassarawa Primary Health Clinic       | Barwo Nassarawa                                             |
| 1333 | GM/0098 | Barwo Windi Primary Health Clinic           | Barwo Windi                                                 |
| 1334 | GM/0099 | Jigawa Primary Health Clinic                | Jigawa                                                      |
| 1335 | GM/0100 | Nafada Primary Health Clinic                | Nafada East                                                 |
| 1336 | GM/0101 | Nada General Hospital                       | Nafada East                                                 |
| 1337 | GM/0102 | Sundingo Dispensary                         | Birnin Bolawa                                               |
| 1338 | GM/0103 | Kiyayo Dispensary                           | Birnin Fulani                                               |
| 1339 | GM/0104 | Madaki Lamu Dispensary                      | Birnin Fulani                                               |
| 1340 | GM/0105 | Guduku Dispensary                           | Guduku                                                      |
| 1341 | GM/0106 | Dindele Dispensary                          | Jigawa                                                      |
| 1342 | GM/0107 | Jolie Dispensary                            | Jigawa                                                      |
| 1343 | GM/0108 | Shole Health Clinic                         | Nafada East                                                 |
| 1344 | GM/0109 | Nyalkam Dispensary                          | Nafada East                                                 |
| 1345 | GM/0110 | Primary Health Centre Filiya                | Filiya                                                      |
| 1346 | GM/0111 | Kulishin Maternity Clinic                   | Kulishin                                                    |
| 1347 | GM/0112 | Burak Maternity Clinic                      | Burak                                                       |
| 1348 | GM/0113 | Bangunji Maternity Clinic                   | Bangunji                                                    |
| 1349 | GM/0114 | Karel Maternity Clinic                      | Karel                                                       |
| 1350 | GM/0115 | Lapan Maternity Clinic                      | Lapan                                                       |
| 1351 | GM/0116 | Gwandum Maternity Clinic                    | Gwandum                                                     |
| 1352 | GM/0117 | Model Maternity Clinic                      | Shongom                                                     |
| 1353 | GM/0118 | Lalapido Maternity Clinic                   | Lalapido                                                    |
| 1354 | GM/0119 | Lashikoltok Maternity Clinic                | Lashikoltok                                                 |
| 1355 | GM/0120 | Kalaku Health Centre                        | Kalaku                                                      |
| 1356 | GM/0121 | Kushi Maternity Clinic                      | Kushi                                                       |
| 1357 | GM/0122 | Amkolom Health Clinic                       | Amkolom                                                     |
| 1358 | GM/0123 | Torro Health Clinic                         | Torro                                                       |
| 1359 | GM/0124 | Majidadi Maternity Clinic                   | Majidadi                                                    |
| 1360 | GM/0125 | Popandi Health Clinic                       | Popandi                                                     |
| 1361 | GM/0126 | Pamadu Health Clinic                        | Pamadu                                                      |
| 1362 | GM/0127 | Labarya Maternity Clinic                    | Labarya                                                     |
| 1363 | GM/0128 | Lasassap Health Clinic                      | Lasassap                                                    |
| 1364 | GM/0129 | Jauro Sajo Community Health Clinic          | Shongom                                                     |
| 1365 | GM/0130 | Lapandimtai Health Clinic                   | Shongom                                                     |
| 1366 | GM/0131 | Lasanjang Health Clinic                     | Shongom                                                     |
| 1367 | GM/0132 | Labekke Health Clinic                       | Shongom                                                     |
| 1368 | GM/0133 | Tedmuzu Health Clinic                       | Shongom                                                     |
| 1369 | GM/0134 | 301 AR (GS) MRS                             | Gombe                                                       |
| 1370 | GM/0137 | Madi Memorial Clinic and Maternity          | Tunfure Investment Estate, Gombe                            |
| 1371 | GM/0138 | Jewel Specialist Hospital                   | Tunfure, Behind Baranbu Filling Station, Gombe, Gombe State |
| 1372 | GM/0139 | Madina Specialist Eye & medical Center Ltd. | Madina Specialist & Medical Centre Limited                  |

|      |         |                                                |                                                                                     |
|------|---------|------------------------------------------------|-------------------------------------------------------------------------------------|
| 1373 | GM/0140 | Police Clinic                                  | Inside Police Barracks, Billiri Gombe State                                         |
| 1374 | GM/0141 | Kumo Medical Clinic                            | Along Gombe-Yola Road, Kumo, Gombe state                                            |
| 1375 | GM/0142 | Federal University Staff Clinic                | Kashere, Gombe State                                                                |
| 1376 | GM/0143 | General Hospital Kashere                       | Kashere, Gombe State                                                                |
| 1377 | IM/0001 | General Hospital Abor                          | Abor Mbaise                                                                         |
| 1378 | IM/0002 | Corpus Christi(Monice Memorial) Hospital       | Amuzi Mbaise                                                                        |
| 1379 | IM/0004 | Jasman Hospital Ltd.                           | Udo Ezinihitte Mbaise, Imo                                                          |
| 1380 | IM/0005 | Obizie People's Medical Centr                  | Obizi Ezinihite, Mbaise, Imo State                                                  |
| 1381 | IM/0006 | Bishop Okoye Memorial Hospital                 | Inyishi, Ikeduru, Owerri, Imo State                                                 |
| 1382 | IM/0009 | General Hospital, Okigwe                       | Okigwe, Imo State                                                                   |
| 1383 | IM/0013 | Our Lady Of Mercy Hospital & Mat.              | 102/104 Royce Road, Owerri                                                          |
| 1384 | IM/0015 | First Concepts Hospital                        | 105, Ikenegbu Layout, Owerri                                                        |
| 1385 | IM/0017 | Angboso Specialist Hospital                    | Plot P6 Work Layout, Owerri                                                         |
| 1386 | IM/0018 | Umezuruike Hospital                            | 21 Umezuruike Street, Owerri                                                        |
| 1387 | IM/0019 | Total Care Medical Centre                      | 148/150 Tetilow Road, Owerri                                                        |
| 1388 | IM/0020 | St. John's Hospital                            | 9 Anokun Str. Owerri                                                                |
| 1389 | IM/0022 | Ngozi Hospital & Maternity                     | Plot 72, Okigwe Road Layout, Owerri.                                                |
| 1390 | IM/0023 | The Chapel Grd Spec. Hospital & Maternity Ltd. | Plot 620 Works Layout, Owerri                                                       |
| 1391 | IM/0024 | Ezem Medical Centre                            | 4 Osuji Street, Owerri                                                              |
| 1392 | IM/0026 | Queen Juliana . Hospital & Maternity           | 7, Ironsi Street, Owerri, Imo                                                       |
| 1393 | IM/0029 | St. Elizabeth Hospital                         | 10 Govt. House/Shell Camp Road, Owerri, Imo State                                   |
| 1394 | IM/0030 | Akaraugo Hospital & Maternity                  | 3, Egbukole Street, Ikenegbu, Imo State                                             |
| 1395 | IM/0031 | Life Spring Specialist Hospital                | Plot 49, Okigwe Road Layout, Owerri, Imo State                                      |
| 1396 | IM/0032 | Jone Medical Centre                            | Plot 189 Ikenegbu Layout Extension, through Chukwuma Nwoha Street, Owerri, Imo Sate |
| 1397 | IM/0033 | Salvation Hospital & Maternity                 | 38, Mcc/Uratta Road, Owerri, Imo State                                              |
| 1398 | IM/0034 | Ikenegbu Hospital & Maternity                  | Plot 11 & 13 Amadi Crescent, Okigwe Road Layout, Owerri, Imo                        |
| 1399 | IM/0035 | St. David's Hospital                           | 14, Mbari Street, Ikenegbu, Owerri, Imo State                                       |
| 1400 | IM/0060 | New Cross Hospital Ltd.                        | 5, New Cross Hospital Street, Ugwuorji, Owerri                                      |

|      |         |                                                 |                                                                            |
|------|---------|-------------------------------------------------|----------------------------------------------------------------------------|
| 1401 | IM/0061 | Aladinma Hospital                               | Transfiguration Road, Owerri, Imo State                                    |
| 1402 | IM/0066 | Uchenna Hospital & Maternity                    | 10/12 Eniweruzoh Crescent Owerri                                           |
| 1403 | IM/0067 | Chinyere Clinic & Maternity                     | 14b, Onumonu Str., Owerri                                                  |
| 1404 | IM/0068 | Christiana Specialist Hospital                  | Egbu/Emuoba Rd., Owerri                                                    |
| 1405 | IM/0070 | Six C. Specialist Clinic                        | 28/30 Orlu Road, Imo State                                                 |
| 1406 | IM/0071 | St. Joseph Hospital                             | 9, Anokun Street, Owerri                                                   |
| 1407 | IM/0072 | St. Luke's Hospital                             | No 2 Ihioma Road Orlu, Imo State                                           |
| 1408 | IM/0073 | Capital Health Hospital                         | 44 Oyima Street, Owerri, Imo State                                         |
| 1409 | IM/0090 | New Life Maternity Home                         | Ikechukwu Estate, Nkworji-Uratta, Owerri                                   |
| 1410 | IM/0091 | Ivory Clinic                                    | Okigwe, Imo State                                                          |
| 1411 | IM/0092 | Imo State University Teaching Hospital          | Orlu, Imo State                                                            |
| 1412 | IM/0093 | Imo State Specialist Hospital, Owerri           | New Owerri, Imo State                                                      |
| 1413 | IM/0094 | Federal Medical Centre, Owerri                  | Owerri, Imo State                                                          |
| 1414 | IM/0095 | 34 AB MRS, Owerri                               | Owerri, Imo State                                                          |
| 1415 | IM/0096 | 342 AR MRS, Owerri                              | Owerri, Imo State                                                          |
| 1416 | IM/0097 | Holy Rosary Hospital                            | Owerri-Umuahia Rd, Nkwogwe Mbaise                                          |
| 1417 | IM/0098 | Solid Rock Hospital & Maternity                 | No 1 Solid Rock Hospital Road Opp. NNPC Filling Station Cristal Rd. Owerri |
| 1418 | IM/0100 | Uchendu Hospital                                | 98 Douglas Rd. Owerri                                                      |
| 1419 | IM/0112 | Federal Polytechnic Medical Centre, Nekede      | Nekede, Owerri, Imo State                                                  |
| 1420 | IM/0115 | Federal University of Technology Medical Centre | Ihiagwa, Owerri, Imo State                                                 |
| 1421 | IM/0118 | Amanda Hospital                                 | Plot 412/415 Works Layout, Owerri, Imo State                               |
| 1422 | IM/0121 | DSS Clinic                                      | Owerri, Imo State                                                          |
| 1423 | IM/0122 | Police Hospital, Imo                            | Owerri, Imo State                                                          |
| 1424 | IM/0124 | International Christian Hospitals               | 11 WAAST AVENUE, IKENEGBU                                                  |
| 1425 | IM/0125 | EBUBEDIKE MEMORIAL HOSPITAL                     | 71, OPARANOZIE STR. OWERRI                                                 |

|      |         |                                                              |                                                                                  |
|------|---------|--------------------------------------------------------------|----------------------------------------------------------------------------------|
| 1426 | IM/0128 | CHRISTIAN MEDICAL CENTER                                     | NWAORIEUBI                                                                       |
| 1427 | IM/0129 | ETITI MEDICAL CENTER                                         | Etiti Isinweke Ihitte Owerri                                                     |
| 1428 | IM/0130 | ROSANNA MEDICAL CENTER                                       | UMUKOTO NEKEDE                                                                   |
| 1429 | IM/0148 | Holy Family Hospital and Maternity                           | 94 Ikenegbu Layout, Owerri                                                       |
| 1430 | IM/0168 | New Amex Specialist Hospital                                 | Plot 989 Amakohia, Owerri                                                        |
| 1431 | IM/0170 | New Creation Medical Consultant                              | 19 Obazu Road, Nworji Mbieri, Owerri                                             |
| 1432 | IM/0173 | Imo State University Teaching Hospital Primary Health Centre | Orlu                                                                             |
| 1433 | IM/0189 | New Annex Specialist Hospital                                | Plot 989, Amakohia, Owerri                                                       |
| 1434 | IM/0191 | St. Joseph's Clinic & Maternity                              | Enyiogugu, Aboh Mbaise, Imo State                                                |
| 1435 | IM/0193 | Edozie Clinic & Maternity                                    | W.W Acholonu Memorial Mission, Awaka, Imo State                                  |
| 1436 | IM/0194 | Bettina Medical Centre                                       | 11 Old Okigwe Road, Owerri                                                       |
| 1437 | IM/0195 | Mother of Mercy Hospital                                     | Umuna Orlu                                                                       |
| 1438 | IM/0196 | Alvan Ikoku Medical Center                                   | Owerri                                                                           |
| 1439 | IM/0197 | Vaden Specialist Clinic and Maternity                        | 4B, Solid Rock road, off World Bank Road, Owerri                                 |
| 1440 | IM/0201 | 1st Royal Care Hospital Ltd                                  | Off Port Harcourt Road, Behind Ebere Link Filling Station, New Owerri, Imo State |
| 1441 | IM/0204 | Steps of Faith Hospital                                      | No. 9, Mere Street, Owerri, Imo State                                            |
| 1442 | IM/0206 | Alpha Clinic & Maternity                                     | 23, Nwafor Street, Orji Uratta, Owerri, Imo State                                |
| 1443 | IM/0207 | Floxy Pan-Opticum Eye Specialist Hospital                    | 464, Tony Okeke Street, Prefab, Owerri, Imo State                                |
| 1444 | IM/0208 | FamilyCare Specialist Clinics                                | New Owerri, Imo State                                                            |
| 1445 | IM/0210 | Geoffrey Memorial Healthcare                                 | No. 43, Okigwe Road, Owerri, Imo State                                           |
| 1446 | IM/0211 | Umuowa Cottage Hospital & Maternity                          | Imo Airport Road Junction, Owerri, Imo State                                     |
| 1447 | IM/0212 | Salvation Hospital and Maternity                             | Nwaorienkpu, Ekwe, Imo State                                                     |
| 1448 | IM/0214 | Frank Medical Centre                                         | Eke Nguru Mbaise, Imo State                                                      |
| 1449 | IM/0215 | Digoe Hospital                                               | 5,Orlu Road Owerri Imo State                                                     |
| 1450 | IM/0217 | Digoe Hospital                                               | 5,Orlu Road Owerri Imo State                                                     |
| 1451 | IM/0218 | St. Damian's Hospital                                        | Okporo Orlu, Imo State                                                           |



|      |         |                                                       |                                                             |
|------|---------|-------------------------------------------------------|-------------------------------------------------------------|
| 1452 | IM/0219 | Zennia Hospital & Maternity                           | No 1 Road 17, Federal Housing Umuguma, Owerri Imo State     |
| 1453 | IM/0221 | Mark of Glory Specialist Hospital                     | 1st Bus Stop, Emeremadu Street, Owerri Imo State            |
| 1454 | IM/0223 | Crown Medical Centre                                  | Nnarambia Ahiazu Mbaise, Imo State                          |
| 1455 | IM/0224 | Austin Graces Hospital                                | 14 Eni Njoku Street, Ikenegbu Layout, Owerri Imo State      |
| 1456 | IM/0225 | Ave Maria Medical Centre                              | Ogbe, Ahiara Imo State                                      |
| 1457 | IM/0226 | Owerri Sickbay                                        | Road 24, Federal Housing Estate, Umuguma, Owerri, Imo State |
| 1458 | IM/0228 | Blessing of The Lord Hospital                         | Site & Services, World Bank, New Owerri Imo State           |
| 1459 | IM/0229 | Eastern Summit Specialist Clinics &Maternity          | 37 Orlu Road, Amakaohia, Owerri Imo State                   |
| 1460 | IM/0230 | Hossana Hospital and Maternity                        | Eziama, Logara, Ngor-Okpala Imo State                       |
| 1461 | JG/0001 | General Hospital, Dutse                               | Dutse, Jigawa State                                         |
| 1462 | JG/0002 | Jahun General Hospital                                | Jahun, Jigawa State                                         |
| 1463 | JG/0003 | General Hospital, Hadejia                             | Hadejia, Jigawa State                                       |
| 1464 | JG/0005 | General Hospital, Gumel                               | Gumel, Jigawa State                                         |
| 1465 | JG/0006 | General Hospital, Kazaure                             | Kazaure, Jigawa State                                       |
| 1466 | JG/0007 | Zainab Memorial Hospital                              | Kazaure, Jigawa State                                       |
| 1467 | JG/0008 | General Hospital, Ringim                              | Ringim, Jigawa State                                        |
| 1468 | JG/0009 | Federal Medical Centre, Birnin Kudu                   | Brnin Kudu, Jigawa State                                    |
| 1469 | JG/0017 | DSS Clinic                                            | Dutse, Jigawa State                                         |
| 1470 | JG/0019 | Police Clinics, Jigawa                                | Jigawa State                                                |
| 1471 | JG/0024 | General Hospital Babura                               | Babura                                                      |
| 1472 | JG/0026 | Federal University Dutse Medical Clinic               | Federal University Campus                                   |
| 1473 | JG/0027 | Rasheed Shekoni Specialist Hospital                   | Dutse, Jigawa                                               |
| 1474 | JG/0028 | Gunduma Health System Council, Dutse General Hospital | Kiyawa Road, Dutse, Jigawa State                            |
| 1475 | JG/0029 | Albarka Clinics                                       | Beside Inuwa Dutse Estate, Jigawa State                     |
| 1476 | JG/0034 | General Hospital, Kafin Hausa                         | Kafin Hausa                                                 |
| 1477 | KB/0001 | General Hospital Argungu                              | Argungu                                                     |
| 1478 | KB/0003 | Federal Medical Center - Birnin Kebbi                 | Birnin Kebbi                                                |
| 1479 | KB/0008 | Sir Yahaya Memorial Hospital                          | Ahmadu Bello Way, Birnin Kebbi                              |
| 1480 | KB/0020 | General Hospital, Yauri                               | Yauri                                                       |
| 1481 | KB/0021 | 1 Bn MRS Birnin Kebbi                                 | Birnin Kebbi, Kebbi State                                   |
| 1482 | KB/0022 | 223 Lt Tk Bn MRS Zuru                                 | Zuru, Kebbi State                                           |
| 1483 | KB/0023 | Godiya Hospital                                       | Bye-Pass Rd Wasarawa, Birinin Kebbi                         |
| 1484 | KB/0024 | DSS Clinic                                            | Birnin Kebbi, Kebbi State                                   |
| 1485 | KB/0025 | Police Clinics, Kebbi                                 | Kebbi State                                                 |
| 1486 | KB/0026 | Nakowa Clinic Ltd                                     | Sokoto - Kontagora Road, Yauri, Kebbi State                 |
| 1487 | KB/0027 | Martha Bamaiyi General Hospital Zuru                  | Zuru Bye-Pass Behind First Bank, Zuru, Kebbi State          |
| 1488 | KB/0037 | Waziri Umar Federal Ploytechnic                       | Gwandu Gwaji Road, Kebbi state                              |

|      |         |                                                  |                                                              |
|------|---------|--------------------------------------------------|--------------------------------------------------------------|
| 1489 | KB/0038 | D D G Medical Centre                             | Behind OANDO Filling Station, Birnin Kebbi, Kebbi State.     |
| 1490 | KB/0039 | University Clinic (F.U.B.K)                      | Federal University Birnin Kebbi, Kebbi State                 |
| 1491 | KD/0005 | Air Force Medical Centre Mando                   | Kaduna                                                       |
| 1492 | KD/0008 | Abdul-Azeez Memorial Hospital Clinic & Maternity | D.B. 10, Kabala West Road, Near Amaboni Hotal Tudun Wada,Kad |
| 1493 | KD/0010 | Giwa Hospital And Specialist Clinic              | 2. Giwa Road Abakpa Kaduna                                   |
| 1494 | KD/0012 | Alba Clinic & Medical Centre                     | 25, Constitution Road, Kaduna                                |
| 1495 | KD/0013 | Sefa Specialist Hospital                         | 3, College Road, Kaduna                                      |
| 1496 | KD/0014 | Covenant Hospital & Maternity                    | Au 6, Benin Street Kaduna.                                   |
| 1497 | KD/0015 | Belmont Specialist Hospital                      | S.S. 5 Nasarawa Road, Kaduna                                 |
| 1498 | KD/0016 | Jowako Hospital                                  | F 15 Jos Road, Kaduna                                        |
| 1499 | KD/0017 | Kagoro Sheshan Clinic                            | Bb11 & 12 Nupe Road, Kaduna                                  |
| 1500 | KD/0018 | Chasel Hospital                                  | 15, Isa Kaita Road, Kaduna                                   |
| 1501 | KD/0019 | Garkuwa Specialist Hospital                      | 1a Sultan Road, Off Isa Kaita Road, Kaduna                   |
| 1502 | KD/0020 | Iyali Hospital & Maternity                       | 7, Kagoro Close, Off Gwari Crescent, Ungwar Rimi Gra, Kaduna |
| 1503 | KD/0021 | Rimi Clinics & Maternity Nig. Ltd.               | 24, Kubaka Road, Off Ja Abdulkadir Road, Ungwan Rimi, Kaduna |
| 1504 | KD/0022 | Salem Hospital Clinics & Mat.                    | B4 School Road, Ungwar Rimi, Kaduna                          |
| 1505 | KD/0026 | Eagle Hospital, Kaduna                           | No. 3, Kujama Street/Gwari Road, Saotasha, kaduna            |
| 1506 | KD/0028 | Barau Dikko Teaching Hospital, Kaduna            | Barau Dikko Teaching Hospital, Kaduna                        |
| 1507 | KD/0029 | Jinya Specialist Hospital                        | 7, Bida Road Kaduna                                          |
| 1508 | KD/0030 | Kabala Hospital                                  | F 1a Market Road, Kaduna                                     |
| 1509 | KD/0076 | Salamatu Hospital & Maternity                    | 2, Bimin Yero Road, Off Kabala West, Road, Kaduna            |
| 1510 | KD/0078 | Fountain Hospital & Maternity                    | Ap 13 Community Bank Road, Prp Bus Stop/Gamagira, Tudun Wada |
| 1511 | KD/0080 | Shehu Kangiwa Medical Centre                     | (Sick Bay), Kaduna Polytechnic, T/Wada Kaduna                |
| 1512 | KD/0081 | Yusuf Dantsoho Hospital                          | T/Wada, Kaduna                                               |
| 1513 | KD/0082 | Maneks Hospital Ltd.                             | A1 Block 5, Makera Road, Kakuri Kaduna                       |
| 1514 | KD/0083 | Amina Hospital Ltd.                              | Gwari Avenue, Kachia Road, Kaduna                            |
| 1515 | KD/0084 | Ishaku Hospital                                  | Gwari Avenue, Kachia Road, Kaduna                            |
| 1516 | KD/0085 | Giltoe Aris Specialist Hospital                  | 17/19 Maiduwa Road, Near Barnawa Market, Kaduna              |
| 1517 | KD/0086 | C Jay Medical Centre                             | Near Dambo Int'l College, No 13, Kubani Crescent, Barnawa Kd |
| 1518 | KD/0087 | Gwamna Awan Hospital                             | Nasarawa, Kaduna                                             |

|      |         |                                                           |                                                             |
|------|---------|-----------------------------------------------------------|-------------------------------------------------------------|
| 1519 | KD/0088 | Sabon-Tasha Bengola Hospital                              | Opp. Command Sec. School, Ung. S                            |
| 1520 | KD/0089 | 44 Armed Forces Reference Hospital                        | Kaduna                                                      |
| 1521 | KD/0090 | Federal Neuropsychiatric Hospital                         | Barnawa, Kaduna                                             |
| 1522 | KD/0111 | Tim Unity Specialist Hospital                             | Bz 104, Ogori Road, Off Kabala Road, Sardunana Crescent Kad |
| 1523 | KD/0112 | Almadina Clinic                                           | No. 28 Queen Elizabeth Road, Gra Zairia                     |
| 1524 | KD/0113 | Ladiya Hospital                                           | 64, Benin Street, Zaira                                     |
| 1525 | KD/0123 | Salama Infirmary Hosp. & Maternity                        | Sokoto Road, Kwangla, Zaira                                 |
| 1526 | KD/0124 | St. Luke's Anglican Hospital                              | Wusasa Zaira                                                |
| 1527 | KD/0126 | Hajia Gambo Sawaba Gen. Hospital                          | Kofar-Gayan, Zaria                                          |
| 1528 | KD/0148 | Sultan Clinics                                            | Nm 12b, Constitution Rd., Kaduna                            |
| 1529 | KD/0149 | Ahmadu Bello University Health Services (Main Campus)     | Samaru Zaria                                                |
| 1530 | KD/0151 | DSS Clinic                                                | Kaduna, Kaduna State                                        |
| 1531 | KD/0152 | 1 Div Hospital                                            | Kaduna, Kaduna State                                        |
| 1532 | KD/0153 | Nigerian Defence Academy                                  | Kawo, Kaduna                                                |
| 1533 | KD/0154 | Infantry Centre & Sch. Armed Forces CSC Med. Centre       | Jaji, Kaduna                                                |
| 1534 | KD/0155 | Depot Nigerian Army/Nig. Army Military School Med. Centre | Chindit Barracks, Zaria, Kaduna                             |
| 1535 | KD/0157 | National Eye Centre                                       | Mando Road, Off Nnamdi Azikiwe Way, Kaduna                  |
| 1536 | KD/0160 | General Hospital, Giwa                                    | Giwa, Kaduna State                                          |
| 1537 | KD/0162 | St Patrick Ibrahim Yakowa Memorial Hospital, Kafanchan    | Kafanchan, Kaduna State.                                    |
| 1538 | KD/0163 | Savannah Poly Clinic                                      | Samaru, Zaria.                                              |
| 1539 | KD/0165 | Moufay Clinic                                             | 11A College Road, Kurmashi, Kaduna                          |
| 1540 | KD/0170 | Mends Specialist Hospital & Aviation Medical Centre       | 5, Abba Kyari Close, Ungwan Rimi GRA, Kaduna                |
| 1541 | KD/0171 | Crystal Clinic & Maternity                                | M2 Poly Road, T/Wada, Kaduna                                |
| 1542 | KD/0173 | 312 AR MRS, Kaduna                                        | Kaduna, Kaduna State                                        |
| 1543 | KD/0174 | 29 Bn MRS, Kaduna                                         | Kaduna, Kaduna State                                        |
| 1544 | KD/0175 | 7 Bn MRS, Jaji                                            | Jaji, Kaduna State                                          |
| 1545 | KD/0176 | 11 FER MRS, Zaria                                         | Zaria, Kaduna State                                         |
| 1546 | KD/0182 | Abi Clinics & Hospital                                    | BZ 104 Ogori Road, Sardauna Crescent, Kaduna                |
| 1547 | KD/0183 | Cottage Hospital/Comprehensive Health Centre              | Police College, Kaduna                                      |
| 1548 | KD/0187 | Monarch Specialist Hospital                               | N/k 12, Arochukwu Road, Kaduna                              |
| 1549 | KD/0188 | Dana Clinic                                               | Old Airport Road, Mando, Kaduna                             |
| 1550 | KD/0189 | Prime Specialist Hospital                                 | Az 16 Bakori Road, Kaduna                                   |
| 1551 | KD/0190 | Anna-Kitch Medical Centre                                 | 15, Wusasa Road, Zaria                                      |
| 1552 | KD/0192 | New Era Hospital & Maternity                              | 8, Funtua Street, Kafanchan                                 |
| 1553 | KD/0193 | Multi Clinic Nig. Ltd.                                    | 26A Yahaya Road, Unguwa Rimi G.R.A., Kaduna                 |
| 1554 | KD/0194 | McRoyal Hospital                                          | Sabon Gari, Kachia                                          |

|      |         |                                                           |                                                               |
|------|---------|-----------------------------------------------------------|---------------------------------------------------------------|
| 1555 | KD/0195 | Oxford Hospital                                           | 38, Airforce Road, Samaru RD, Makera, Kaduna                  |
| 1556 | KD/0196 | Restoration Hospital Inc.                                 | AL 1, Wushishi RD, BU Lagos St., Kaduna                       |
| 1557 | KD/0197 | Hitaf Specialist                                          | D% Garbajar Abdulkadir Rd, Off Rimi drive, U/Rimi, Kaduna     |
| 1558 | KD/0199 | General Hospital Makarfi                                  | Makarfi Town                                                  |
| 1559 | KD/0200 | St Gerard Catholic Hospital                               | Kakuri Kaduna                                                 |
| 1560 | KD/0201 | National Teachers Institute Staff Clinic                  | Km 5 Kaduna-Zaria Expressway, Kaduna                          |
| 1561 | KD/0223 | A B U Teaching Hospital, Shika                            | Shika, Zaria, Kaduna State                                    |
| 1562 | KD/0226 | Biba Hospital                                             | AE 7, Matazu Close, off Rigachukwu Road, T/Wada, Kaduna       |
| 1563 | KD/0228 | Al Mansur Specialist Hospital                             | No. 7A Wurno Road Opposite KSMC, Kaduna                       |
| 1564 | KD/0229 | Police Clinics, Kaduna                                    | Kaduna State                                                  |
| 1565 | KD/0230 | Jibrin Mai-Gwari Hospital                                 | Birnin Gwari, Kaduna                                          |
| 1566 | KD/0231 | National Board for Tech. Education (NBTE), Medical Centre | Plot B Bida Road, Kaduna                                      |
| 1567 | KD/0235 | Ag-Lima County Hospital & Maternity                       | No. 16, College Road Sabon Tasha, Kaduna                      |
| 1568 | KD/0236 | Barka Specialist Hospital                                 | AU5 Gamagira Road, Barkin Ruwa, U/Sanus, Kaduna               |
| 1569 | KD/0238 | Grace Memorial Specialist Hospital                        | Dan-Magaji New Market Road, Zaria, Kaduna                     |
| 1570 | KD/0239 | Horeb Specialist Hospital                                 | 4 Force Road Maraba Estate, Kaduna                            |
| 1571 | KD/0240 | Jema'a Hospital                                           | 90 Sarkin Pawa Road, Samaru, Zaria, Kaduna                    |
| 1572 | KD/0241 | Jicon Hospital & Specialist Clinic                        | No. 4 Danwaire Street, Kaduna                                 |
| 1573 | KD/0242 | Maraba Clinic and Maternity                               | Shehu Idris Street Kabama Medium Housing Estate, Zaria Kaduna |
| 1574 | KD/0243 | Mashi Hospital & Specialist Clinics                       | 17 Sabo-Line Kurmin-Mashi, Kaduna                             |
| 1575 | KD/0244 | Mayfair Clinic Nigeria Ltd.                               | 8 Crescent Rd Sabon Gari, Zaria                               |
| 1576 | KD/0247 | Outfit Hospital Ltd                                       | Marafa Close Off Independence Road, Opp ASD City Mall. Kaduna |
| 1577 | KD/0248 | Rakiya Memorial Hospital & Maternity Inc.                 | JJ 9, Ibadan Street, Kaduna                                   |
| 1578 | KD/0249 | Saby Hospital                                             | HI Kagoma Road, Kaduna                                        |
| 1579 | KD/0250 | Saidu Dange Railway Zaria                                 | Sokoto Road Railway Hospital, Zaria                           |
| 1580 | KD/0251 | Senda Poly Clinic                                         | 37, Dawaki Bassa Road, Kakuri, Kaduna                         |
| 1581 | KD/0252 | Skills Specialist Clinic                                  | No. 16 Kurmi Avenue, Kabala Costain, Kaduna                   |
| 1582 | KD/0253 | Sovanel Orthopaedic Clinic & Med. Clinic                  | Abubakar Kigo Rd, New Extension, Kaduna                       |

|      |         |                                              |                                                          |
|------|---------|----------------------------------------------|----------------------------------------------------------|
| 1583 | KD/0254 | Wilbasun Hospital & Maternity                | No. MB28 Massallaci Road, Narayi, Kaduna                 |
| 1584 | KD/0280 | Diamond Specialist Hospital                  | 4 MM Lawan Jaafaru Isa Road, GRA, Off Isa Kaita Road     |
| 1585 | KD/0281 | Nigerian Railway Hospital                    | Railway Compound, Kafanchan, Kaduna State                |
| 1586 | KD/0282 | Chaha Eye Hospital & General Clinics         | 42B Jabi Road off Alkali Road GRA Kaduna                 |
| 1587 | KD/0284 | Zaria Clinic & Medical Centre                | 16 Hospital Road T/Wada, Zaria                           |
| 1588 | KD/0288 | Royal Medical Centre                         | Opp. Kurmin Marshi Police Station, Kaduna                |
| 1589 | KD/0290 | Calvary Clinic & Maternity                   | 2 Kano Street, By Hospital Road, Kafanchan               |
| 1590 | KD/0294 | Salvation Hospital & Maternity               | 2B Algbria Crescent, Barnawa, Kaduna                     |
| 1591 | KD/0296 | Fomwan Hospital                              | 28 Musana Road, Malali, Kaduna                           |
| 1592 | KD/0298 | Musaka Specialist Hospital                   | 10B Nagwamatse Road, U/Rimi, Kaduna                      |
| 1593 | KD/0308 | Albarka Hospital                             | BZ170, Offa Road by Sardauna Crescent, Kaduna            |
| 1594 | KD/0309 | St Louis Hospital                            | Zonkwa Kaduna Road, Zangon Kataf                         |
| 1595 | KD/0314 | Command and Staff College Clinic             | Jaji                                                     |
| 1596 | KD/0315 | Acada MRS                                    | Aganu Kachia                                             |
| 1597 | KD/0316 | Arty Training School MRS                     | Kachia                                                   |
| 1598 | KD/0318 | Federal College of Education Medical Centre  | Kongo, Zaria                                             |
| 1599 | KD/0319 | Dabo Mohammed Lere Memorial Hospital         | Along Jos Road, Saminaka                                 |
| 1600 | KD/0321 | Defence Industry Corporation of Nigeria, MRS | Ahmadu Bello Way, Kaduna                                 |
| 1601 | KD/0327 | Muslim Specialist Hospital                   | Wusasa, Zaria                                            |
| 1602 | KD/0328 | Aero Medical Centre                          | Nigeria College of Aviation Technology, Zaria            |
| 1603 | KD/0329 | Mai Jedah Memorial Hospital                  | K12 Kakuri road, Kawo Kaduna                             |
| 1604 | KD/0330 | Aloaye Clinic and Maternity                  | 4 Gaskiya Road, Zaria                                    |
| 1605 | KD/0331 | Trinity Nursing and Maternity Home           | Behind JV Hotel Ungwan Boro                              |
| 1606 | KD/0332 | Faith Nursing and Maternity                  | 7, Magaji Close, Ungwan Pama                             |
| 1607 | KD/0333 | Harmony Hospital                             | 38 Nuhu Aliyu Crescent, Barnawa Layout, Kaduna           |
| 1608 | KD/0334 | Dami Clinic Maternity                        | 2, Denge Road, New Afaka                                 |
| 1609 | KD/0335 | Brightway Medical Clinic                     | 1 Narayi Road, Mountain Road, Kudenda                    |
| 1610 | KD/0336 | Jodeb Hospital and Maternity                 | 5, Yoruba Road, Kaduna                                   |
| 1611 | KD/0338 | Badarawa Hospital                            | 2 Kamsalem Road, near L.E.A Primary School, Kaduna       |
| 1612 | KD/0340 | Crystal Clinic and Maternity                 | 6 Makera Road, Opp, Kaduna South LGA Secretariat, Kakuri |
| 1613 | KD/0341 | Pal Hospital                                 | 15, River Road, Behind Diamond Bank, GRA, Zaria          |

|      |         |                                                    |                                                                                        |
|------|---------|----------------------------------------------------|----------------------------------------------------------------------------------------|
| 1614 | KD/0342 | Dallof Special;ist Hospital Limitred               | 136 Bayajida Roadf, Angwa Rimi, GRA Kaduna                                             |
| 1615 | KD/0344 | Nat. Inst. for Chemica Tech Medical centre         | Basawa, Zaria                                                                          |
| 1616 | KD/0346 | Dialogue Sepcialist Clinics Ltd.                   | #1, Kukan Road, U/Dosa, Kaduna                                                         |
| 1617 | KD/0347 | ChrysoryteHospital Nig. Ltd                        | Kamazao Road by Ex-Service quaters, by Refinery junction, Mahutta, kaduna              |
| 1618 | KD/0348 | National Institute for Chemical Technology         | Medical Center, Basawa, Zaria,                                                         |
| 1619 | KD/0349 | Elite international Hospital                       | # 1, Chikaji Road, Opp MTD Police, Zaria                                               |
| 1620 | KD/0350 | Makemvic Hospital Ltd                              | #59, Gwar Road (KASUPDA), off Post office, opp Step by Step Hotel, Sabon Tasha, Kaduna |
| 1621 | KD/0351 | Terra Medical Center                               | # 5, Alh nasiru Idi close, Hanwa new extension, Zaria                                  |
| 1622 | KD/0352 | Family - Care Hospital and Maternity               | #54, King Hassan (Bourmedine) Rd, Narayi High cost, Banawa Kaduna                      |
| 1623 | KD/0353 | Mummy Maternity and Nursing Home                   | Kwangila, Zaria                                                                        |
| 1624 | KD/0354 | Al-Madinat Specialist Hospital                     | MM1 Sabon Birni Road, By Nassarawa Road along Kawo New Extension                       |
| 1625 | KD/0355 | Bawa Memorial Medical Centre                       | #100, Hayin Mallam, Zango, Zaria                                                       |
| 1626 | KD/0358 | Major Ibrahim B Abdullahi (MIBA) Memorial Hospital | # 21D, Aminu Kano road, Sabo Gari Zaria                                                |
| 1627 | KD/0359 | Rural Hospital Pambeguwa                           | Along Saminaka Road, Pambeguwa, Kaduna                                                 |
| 1628 | KD/0360 | Mallam Sidi Shehu Dalibi Memorial Health Center    | 14, Hospital Rd, K/Gayan Low Cost Housing Estate, Gidan Isa Maigari, Zaria City        |
| 1629 | KD/0362 | Dan Giwa Memorial Hospital                         | By Noruin Guest House, Maraban Rido kaduna, Kaduna State                               |
| 1630 | KD/0364 | Bio Clinics & Hospital                             | 9/15 Mozambique Road, Barnawa Kaduna, Kaduna State                                     |
| 1631 | KD/0366 | St. Martins De-orres Hospiat                       | Catholic Diocese of Zaria, P.O. Box 90, Wusasa, Zaria, Kaduna State.                   |
| 1632 | KD/0367 | Godiya Hospital                                    | XP 34, Kabala Road by Express bye pass, Tudun Wada, Kaduna State.                      |
| 1633 | KD/0370 | Ema Hospital &Maternity Ltd                        | DD 6 Kabba Road, Kaduna, Kaduna State.                                                 |
| 1634 | KD/0371 | Nuhu Bamalli Polytechnic                           | Zaria, Kaduna State.                                                                   |
| 1635 | KD/0372 | Fisabil Hospital                                   | 22, NIMASA Road, off Katuru Road, From Rabah Road, Badarawa, Kaduna, Kaduna State      |
| 1636 | KD/0377 | Gemine Hospital & Maternity                        | NB 6, Barnawa Dan Warri Street, Kaduna State                                           |
| 1637 | KD/0379 | Belside Hospital                                   | No. 5 Kanta Road, Kaduna, Kaduna State                                                 |

|      |         |                                        |                                                      |
|------|---------|----------------------------------------|------------------------------------------------------|
| 1638 | KD/0380 | Garden City Specialist Hospital        | No.2 Sultan Road Ungwa Rimi, Kaduna State            |
| 1639 | KD/0383 | Adonai Rapha Medical                   | 5, Auza Street Barnawa, Kaduna State.                |
| 1640 | KD/0386 | Al- Muniff Hospital                    | 13AB, Abba Road U/Rimi Kaduna, Kaduna State          |
| 1641 | KD/0388 | Medical Center Kaduna State University | Tafawa Balewa Way, Kaduna State                      |
| 1642 | KD/0389 | Sultan Hospital Nig Ltd                | AH1, Makarfi Road, Rigasa New Ext. Kaduna State      |
| 1643 | KD/0391 | NNPC Industrial Hospital Kaduna        | Km 16, Kachia Road, NNPC Housing Estate Kaduna State |
| 1644 | KD/0395 | Women's Health International           | 52, Hanwa GRA Zaria, Kaduna State.                   |
| 1645 | KD/0396 | AP Smart Hospital                      | Gwagwada Street, Trikania, Kaduna State.             |
| 1646 | KD/0397 | National Ear Care Center               | 3, Golf Course Road, Kaduna State                    |
| 1647 | KD/0399 | El Barau Medical and Diagnostic Centre | Benin Street, Sabon Gari, Zaria, Kaduna State        |
| 1648 | KD/0400 | MSK Specialist Hospital                | 10 Kangiwa/Makarfi Road, Rigasa Kaduna, Kaduna State |
| 1649 | KG/0001 | ASCL Medical Centre, Ajaokuta          | Ajaokuta Steel Co. Ltd., Kogi State                  |
| 1650 | KG/0005 | General Hospital Dekina                | Dekina                                               |
| 1651 | KG/0007 | Maternal & Child Welfare, Dekina       | Dekina                                               |
| 1652 | KG/0009 | General Hospital, Idah                 | Idah                                                 |
| 1653 | KG/0012 | Niger Hospital                         |                                                      |
| 1654 | KG/0015 | General Hospital, Mopa                 | Mopa                                                 |
| 1655 | KG/0017 | General Hospital, Okene                | Okene                                                |
| 1656 | KG/0019 | Ecwa Hospital                          | Mission Road Egbe                                    |
| 1657 | KG/0020 | Federal Medical Center Lokoja          | Lokoja                                               |
| 1658 | KG/0021 | General Hospital, Kabba                | Kabba                                                |
| 1659 | KG/0022 | General Hospital, Isanlu               | Isanlu                                               |
| 1660 | KG/0023 | General Hospital, Ankpa                | Ankpa                                                |
| 1661 | KG/0025 | Ali Omeza Hospital                     | Lokoja                                               |
| 1662 | KG/0026 | Comprehensive Health Centre            | Isanlu Town                                          |
| 1663 | KG/0028 | Comprehensie Health Clinic             | Idofin                                               |
| 1664 | KG/0030 | Specialist Hospital, Obangede          | Obangede                                             |
| 1665 | KG/0031 | Cottage Clinic                         | Odo Ere                                              |
| 1666 | KG/0032 | Femi Hospital                          | Edumo-Bunu                                           |
| 1667 | KG/0033 | General Hospital, Ayetoro Gbede        | Ayetoro Gbede                                        |
| 1668 | KG/0034 | Township Clinic & Maternity            | Ajaokuta                                             |
| 1669 | KG/0035 | Maria Gorrete Hospital                 | Ayingba                                              |
| 1670 | KG/0036 | General Hospital, Iyamoye              | Iyamoye                                              |
| 1671 | KG/0045 | Cant MRS Lokoja                        | Lokoja, Kogi State                                   |
| 1672 | KG/0046 | Federal College Of Education           | Federal College Of Education Okene                   |
| 1673 | KG/0047 | Grimard Catholic Hospital              | Grimard Catholic Hospital Anyiagba                   |

|      |         |                                                         |                                                                |
|------|---------|---------------------------------------------------------|----------------------------------------------------------------|
| 1674 | KG/0048 | Duro Soley Hospital                                     | B+B Ajaokuta                                                   |
| 1675 | KG/0050 | Welfare Clinic & Maternity                              | GRA Okene                                                      |
| 1676 | KG/0051 | Odoma Clinic & Maternity                                | Odoma Clinic Idah                                              |
| 1677 | KG/0060 | DSS Clinic                                              | Lokoja, Kogi State                                             |
| 1678 | KG/0061 | Federal Polytechnic Medical Centre                      | Idah - Ajaka Road, Kogi State                                  |
| 1679 | KG/0062 | Fed. College of Education Medical Centre, Okene         | Okene, Kogi State                                              |
| 1680 | KG/0064 | poly hospital and mat.home                              | janet ekundayo road, Lokoja                                    |
| 1681 | KG/0065 | Laronk clinic and maternity                             | Ajaokuta                                                       |
| 1682 | KG/0066 | Comprehensive Health Center(UTH branch)                 | Ihima                                                          |
| 1683 | KG/0071 | Oyiba Hospital                                          | 5 Enyidudu Street, Woziomi Okene                               |
| 1684 | KG/0072 | Oyiza Hospital                                          | Okene Road, Okene                                              |
| 1685 | KG/0074 | Police Clinic                                           | Police State Command, Lokoja                                   |
| 1686 | KG/0080 | Federal University Lokoja Medical Centre                | Lokoja                                                         |
| 1687 | KG/0081 | Oyiza Hospital                                          | Along Okene Road, Adavi Town, Kogi State.                      |
| 1688 | KG/0082 | Good Shepherd Medical Centre                            | No 10, Egume /Ankpa Road, Anyigba, Kogi State.                 |
| 1689 | KG/0084 | Kogi State Specialist Hospital                          | Along Okene-Kabba Road                                         |
| 1690 | KG/0086 | National Iron Ore Mining Company Limited Medical Centre | National Iron Ore Mining Company Limited, Itakpe               |
| 1691 | KG/0089 | Acheka Medical Centre                                   | Ojielanyi Ankpa, Kogi State.                                   |
| 1692 | KG/0090 | Liberty Medical Clinic                                  | Road 12, ASCO Camp, Ajaokuta, Kogi State.                      |
| 1693 | KG/0091 | St. Margaret 's Clinic                                  | Behind Dabras Hotel, Ebogogo Rd, G.R.A. Okene, Kogi            |
| 1694 | KG/0092 | Covenant Care Clinic & Maternity                        | Flat 91G Ondo Estate (SAE), Ajaokuta, Kogi State.              |
| 1695 | KG/0093 | General Hospital Ugwolawo                               | Ugwolawo, Ofu LGA                                              |
| 1696 | KG/0095 | Peace Hospital                                          | No 1, Peace Crescent, Off Old Egume Rd, Anyigba, Kogi State.   |
| 1697 | KG/0096 | Zenith Specialist Hospital                              | Olunle Street, Near Army Signal, Lokoja, Kogi Stat             |
| 1698 | KG/0097 | Victory Memorial Medical Centre                         | Opposite Federal College of Education, Otite, Kogi State.      |
| 1699 | KG/0098 | Comprehensive Healthcare Centre, Onyedega               | Behind Police Station, Onyedega Kogi State.                    |
| 1700 | KG/0099 | S & A Hospital                                          | Ajetachi Anyigba, Kogi State                                   |
| 1701 | KG/0100 | Nagazi clinic & Maternity                               | Behind Nagazi new market, Nagazi Okene. Kogi state             |
| 1702 | KG/0102 | The Ray of light Hospital                               | 25, ogugu road, okpo, Kogi state                               |
| 1703 | KG/0103 | Bethel Hospital                                         | Ochogobi lay out, Ankpa, Kogi state                            |
| 1704 | KG/0104 | Hillcrest Clinic And Maternity                          | Opposite Dunamis church, along Ganaja road, lokoja, Kogi state |
| 1705 | KG/0105 | Relief Clinic And Maternity                             | 2A lafia street, okene, Kogi state                             |
| 1706 | KG/0106 | Rehoboth Specialist Hospital                            | 2nd gate, phase II, lokongoma, lokoja, Kogi state              |



|      |         |                                                |                                                                                 |
|------|---------|------------------------------------------------|---------------------------------------------------------------------------------|
| 1707 | KG/0107 | Neighbour Multicare Hospital And Women Welfare | Omata street, Anyigba, Kogi state                                               |
| 1708 | KG/0108 | Neighbour Multicare Hospital And Women Welfare | Omata street, Anyigba, Kogi state                                               |
| 1709 | KG/0109 | Immanuel Clinic                                | No 12, Ajaka Road, Idah, Kogi State                                             |
| 1710 | KG/0111 | Concord Hospital                               | 1st 200 unit estate, opposite total filling station, Gadumo, Lokoja, Kogi state |
| 1711 | KG/0113 | Helping Hands Women Hospital                   | Behind T-Square Hotel, Zone 8 Roundabout, Lokoja                                |
| 1712 | KN/0015 | Sir Mohammed Sanusi Specialist Hosp.           | Yan Kaba, Kano                                                                  |
| 1713 | KN/0026 | Khadijat Memorial Hospital                     | No. 20 Katsina Road, Off Hajj Camp Road, Opp Customs Barrack                    |
| 1714 | KN/0028 | Mos-Metro Clinic                               | Sabon Gari, Kano                                                                |
| 1715 | KN/0029 | Unicare Clinic & Maternity                     | Katsina Road , Kano                                                             |
| 1716 | KN/0030 | Topcare Specialist Medical Centre              | No; 118 Hadejia Rd , Kano                                                       |
| 1717 | KN/0031 | Ivory Clinic & Maternity                       | Aminu Kano, Kano                                                                |
| 1718 | KN/0032 | Premier Clinics                                | Gyadi Gyadi, Kano                                                               |
| 1719 | KN/0034 | Saymays Specialist Hospital Ltd                | Zoo Road, Kano                                                                  |
| 1720 | KN/0035 | International Clinic & Hospital Ltd.           | 40, Niger Street, Airport Road, Kano                                            |
| 1721 | KN/0036 | Medicus Clinics                                | No. 2 Beirut Road, Kano                                                         |
| 1722 | KN/0037 | Al-Ammeen Medical Centre                       | Maiduguri Road, Kano                                                            |
| 1723 | KN/0038 | Nakowa Clinics                                 | No. 9 Airport Road, Kano, Barewa Clinics & Maternity, 11, Za                    |
| 1724 | KN/0041 | Warshi Hospital                                | Dakata, Kano                                                                    |
| 1725 | KN/0042 | Zaks Clinic and Maternity Ltd.                 | Opp. Corner Dankura, Behind PDP HQ. Zoo Road, Kano                              |
| 1726 | KN/0043 | Global Clinic                                  | No. 1, 33rd Link, Off New Court road, Gyadi-Gyadi, Kano                         |
| 1727 | KN/0044 | Classic Clinic Ltd.                            | 1a Abbass Road, Kano                                                            |
| 1728 | KN/0046 | Ideal Hospital                                 | Sabon Gari, Kano                                                                |
| 1729 | KN/0070 | Barewa Clinic & Maternity                      | 11, Zaria Road, Kano.                                                           |
| 1730 | KN/0071 | DSS Clinic                                     | Kano, Kano State                                                                |
| 1731 | KN/0072 | Nigeria Customs Service Med. Centre            | Katsina Rd, Customs Barracks, Kano                                              |
| 1732 | KN/0073 | Armed Forces Spec. Hospital                    | 2, Ashton Road, Kano                                                            |
| 1733 | KN/0074 | 349 Nigerian Airforce Hospital, Kano           | NAF Base, Kano                                                                  |
| 1734 | KN/0075 | General Hospital, Gwarzo                       | P.O. BOX 10911 Kano,                                                            |
| 1735 | KN/0076 | Murtala Mohammed Spec. Hospital                | Kano City, Kano State                                                           |
| 1736 | KN/0077 | General Hospital, Wudil                        | Wudil, Kano, Kano State                                                         |
| 1737 | KN/0078 | Mohammed Abdullahi Wase Spec. Hospital         | Nasarawa, Kano, Kano State                                                      |
| 1738 | KN/0079 | General Hospital, Danbatta                     | Danbata, Kano, Kano State                                                       |
| 1739 | KN/0081 | Sheikh Mohammed Jida Gen. Hospital             | Sabon Gari, Kano, Kano State                                                    |
| 1740 | KN/0082 | Aminu Kano Teaching Hospital                   | Gyadi Gyadi, Kano, Kano State                                                   |
| 1741 | KN/0085 | 3 Bde MC, Kano                                 | Kano, Kano State                                                                |
| 1742 | KN/0086 | Bayero University Health Centre                | Kano, Kano State                                                                |
| 1743 | KN/0088 | 5 Bn MRS Janguza                               | Janguza, Kano, Kano State                                                       |

|      |         |                                                          |                                                                         |
|------|---------|----------------------------------------------------------|-------------------------------------------------------------------------|
| 1744 | KN/0089 | Cottage Hospital/Comprehensive Health Centre             | Police Academy, Wudil, Kano                                             |
| 1745 | KN/0090 | Cottage Hospital/Comprehensive Health Centre             | Kano State Police Command, Kano State                                   |
| 1746 | KN/0091 | National Orthopaedic Hospital, Kano                      | Kano, Kano                                                              |
| 1747 | KN/0094 | Godiya Clinics and Maternity                             | Plot 177/177 Na'ibawa Zaria Road Kano                                   |
| 1748 | KN/0095 | Standard Special Hospital                                | 8A Lamido Crescent Nassarawa Kano                                       |
| 1749 | KN/0096 | Cordial Hospital & Maternity                             | 68 Sarkin Yaki Nomansland Kano                                          |
| 1750 | KN/0098 | Excellence Clinic Maternity Ltd                          | 32 Tarauni Gardens Maiduguri Road Kano                                  |
| 1751 | KN/0099 | Triumph Clinic And Maternity Limited                     | 106, New Hospital Road Extension Hausawa Kano                           |
| 1752 | KN/0108 | Good Pasture Clinic                                      | 6, Citta Avenue, Noman's Land, Kano                                     |
| 1753 | KN/0109 | Lafiya Surgery                                           | 52, Ogoja Street, Sabon Gari, Kano                                      |
| 1754 | KN/0110 | General Hospital, Tudun Wada                             | Tudun Wada LGA, Kano State                                              |
| 1755 | KN/0111 | General Hospital, Bichi                                  | Bichi, Kano State                                                       |
| 1756 | KN/0112 | Federal College of Educ. (Technical) Staff Clinic, Bichi | Bichi, Kano State                                                       |
| 1757 | KN/0113 | Fed. College of Educ. Staff Clinic, Gwale                | Gwale, Kano State                                                       |
| 1758 | KN/0115 | Al Noury Specialist Hospital                             | No 1 Iyaka Road off Zaria Road, Kano                                    |
| 1759 | KN/0119 | Modula Clinic & Maternity                                | 59, New Road, Sabon Gari, Kano                                          |
| 1760 | KN/0120 | Nigerian Law School Medical Centre                       | Tiga Road, Off Zaria - Kano Express Road, Kano                          |
| 1761 | KN/0122 | Vintage Clinic                                           | 28 Sharada GRA, Kano                                                    |
| 1762 | KN/0135 | Pinnacle Specialist Hospital, Kano                       | Plot 11-12 Hausawa Quarters, Kano                                       |
| 1763 | KN/0137 | Good Posture Clinic                                      | 6 Citta Avenue, Nomanland, Kano                                         |
| 1764 | KN/0144 | Sharada Industrial Clinic                                | 60 Ahmed Nuhu Street, Close to Corner Freedom Radio, Kano               |
| 1765 | KN/0145 | General Hospital, Minjibir                               | Minjibir                                                                |
| 1766 | KN/0147 | Alpha Clinic & Maternity                                 | 5B, Sarkin Yaki Street by Airport Road, Opp Oando Filling Station, Kano |
| 1767 | KN/0148 | City Medical Clinic                                      | 104 Aminu Kano Way, Goron Dutse, Kano                                   |
| 1768 | KN/0149 | Amity Hospital & Medical Services Ltd                    | 10, 13 Link off court Rd, Hausawa, Kano State                           |
| 1769 | KN/0150 | Sumaila General Hospital                                 | Kano                                                                    |
| 1770 | KN/0152 | Gaya General Hospital                                    | 25, Constitution Rd, Kano                                               |
| 1771 | KN/0153 | Yadakunya Leprosy Hospital                               | Zone 1, Municipal, P.M.B 3247, kano                                     |
| 1772 | KN/0154 | Wisdom Hospital                                          | 2, Abdullahi Bayero Street, Beside Nasarawa Hosp, Kano State            |

|      |         |                                                         |                                                                                          |
|------|---------|---------------------------------------------------------|------------------------------------------------------------------------------------------|
| 1773 | KN/0155 | NOL International Hospital and Diagnosis Centre Limited | 1A Sultan Road Nassarawa GRA, Kano                                                       |
| 1774 | KN/0156 | Al Farma Ultra Modern Hospital and Diagnostic Centre    | 7A Katsina Road Opp. Federal Secretariat, Kano                                           |
| 1775 | KN/0157 | Mariya Sanusi Maternity Hospital                        | Kano State                                                                               |
| 1776 | KN/0159 | Dawakin Kudu General                                    | Dawakin Kudu, Kano                                                                       |
| 1777 | KN/0160 | Tunik Hospital                                          | Nomansland, Kano, Kano State.                                                            |
| 1778 | KN/0162 | Kanya Clinics & Hosp                                    | Panshekara, Kano, Kano State.                                                            |
| 1779 | KN/0163 | Police Children School Clinic, Shanono                  |                                                                                          |
| 1780 | KN/0164 | Gezawa General Hospital                                 | Kano State                                                                               |
| 1781 | KN/0165 | Infectious Diseases Hospital.                           | No. 1, Abuja Rd/France Rd Kano                                                           |
| 1782 | KN/0166 | Waziri Shehu Gidado General Hospital                    | Bachirawa Katsina Road, Kano State                                                       |
| 1783 | KN/0170 | Sumar Specialist Clinics                                | Airport Road, Behind Kabo Holdings By Kriss Nursery & Primary School, Kano, Kano State.  |
| 1784 | KN/0171 | Greenland Clinics And Maternity Ltd                     | No. 49a Sarki Yaki Street Nomansland Kano State.                                         |
| 1785 | KN/0172 | Prime Specialist Hospital                               | 19 Lamodo Crescent Kano, Kano State                                                      |
| 1786 | KN/0173 | Sabo Bakin Zuwo Maternity Hospital                      | Jakara , Kano State                                                                      |
| 1787 | KN/0176 | Mai Akoko Clinic                                        | No. 96 Naibawa Yanlemo, Kano, Kano State                                                 |
| 1788 | KN/0177 | Oasis Clinic Maternity                                  | Ungwu Uku U- Turn Behind Matrix Filling Station, Opposite Zenith Bank, Kano, Kano State. |
| 1789 | KN/0178 | City Clinic & Maternity                                 | No. 149 Daurawa Quarters, Maiduguri Road, Kano, Kano State.                              |
| 1790 | KN/0180 | Karaye Comprehensive Healthcare Centre                  | Karaye, Kano State.                                                                      |
| 1791 | KN/0181 | Northwest University Teaching Hospital                  | Off Zaria Road Kano                                                                      |
| 1792 | KN/0182 | Al-Ihsan Expert Medical and Diagnostic Centre           | 312,Tudu Fulani, Darmanawa Qtrs. Kano                                                    |
| 1793 | KN/0183 | Best Choice Clinic and Maternity                        | 488, Hospital Road, Sabon Gandu, Kano, Kano State                                        |
| 1794 | KT/0001 | Bakori Clinic & Maternity                               | 1, Raba Road, Bakori, behind Sharia Court, Bakori, Katsina State                         |
| 1795 | KT/0002 | Primary Health Care Center, Bakori                      | Bakori District                                                                          |
| 1796 | KT/0003 | Federal Government Girls College Clinic                 | F.G.C. Bakorii                                                                           |
| 1797 | KT/0004 | Primary Health Center, Dandume                          | Dandume                                                                                  |
| 1798 | KT/0005 | General Hospital, Daura                                 | Daura                                                                                    |
| 1799 | KT/0006 | Federal Govt. College Daura Clinic                      | F.G.C Daura                                                                              |
| 1800 | KT/0007 | Bawo Clinic                                             | Mallamawa Quarters Daura                                                                 |
| 1801 | KT/0009 | General Hospital, Dutsinma                              | Dutsinma                                                                                 |
| 1802 | KT/0012 | General Hospital Funtua                                 | Funtua                                                                                   |
| 1803 | KT/0013 | Khadijat Medical Center                                 | No. 53 Katsina Road Funtua                                                               |
| 1804 | KT/0014 | Bistit Hospital                                         | No. 36 Katsina Road                                                                      |
| 1805 | KT/0015 | Hajara Med. & Ultrasound Centre                         | Birnin-Gwari-Lagos Road, Dandume, Katsina                                                |

|      |         |                                                 |                                                                                  |
|------|---------|-------------------------------------------------|----------------------------------------------------------------------------------|
| 1806 | KT/0016 | Nakowa Hospital & Ultra Sound Center            | Sokoto Road, Funtua                                                              |
| 1807 | KT/0019 | General Hospital Kankara                        | Health Service Mgt. Board                                                        |
| 1808 | KT/0020 | General Hospital, Kankiya                       | Kankiya                                                                          |
| 1809 | KT/0021 | Federal Medical Center, Katsina                 | Murtala Mohammed Way                                                             |
| 1810 | KT/0024 | Federal College Of Education Staff Clinic       | Katsina                                                                          |
| 1811 | KT/0025 | Hassan Usman Katsina Staff Clinic               | Katsina                                                                          |
| 1812 | KT/0033 | General Hospital Kurfi                          | Health Service Mgt. Board                                                        |
| 1813 | KT/0035 | Malumfashi Clinic & Maternity                   | Malumfashi                                                                       |
| 1814 | KT/0036 | General Hospital Mani                           | Mani-Mashi Road Katsina                                                          |
| 1815 | KT/0038 | Primary Health Care Center Mashi                | Mashi                                                                            |
| 1816 | KT/0039 | Katsina General Hospital                        | Katsina, Katsina State                                                           |
| 1817 | KT/0041 | DSS Clinic                                      | Katsina, Katsina State                                                           |
| 1818 | KT/0042 | General Hospital, Malufashi                     | Malufashi, Katsina State                                                         |
| 1819 | KT/0044 | 35 Bn MRS, Katsina                              | Katsina, Katsina State                                                           |
| 1820 | KT/0046 | Ibrahim Coomassie Modern Police Hospital        | Katsina State Police Command, Katsina                                            |
| 1821 | KT/0047 | New Millenium Hospital                          | 110, Ahmadu Bello Way, Katsina                                                   |
| 1822 | KT/0055 | New Funtua Clinic                               | 3 Jabir Roundabout, Zaria Road, Funtua                                           |
| 1823 | KT/0061 | Jibia Clinic                                    | Tundun Wada Area, Jibia Town                                                     |
| 1824 | KT/0062 | Daura Clinics & Medical Centre                  | # 29, Zango Road, Daura, Katsina                                                 |
| 1825 | KT/0064 | Abdullahi Diko Inde Customs Clinic              | Lema Jibril road, Customs House, Katsina                                         |
| 1826 | KT/0065 | Amfani Clinic & Mat Home                        | 15, funtua crescent, New Layout Katsina                                          |
| 1827 | KT/0066 | University Clinic                               | Federal University, Take- off Campus, federal University Dutsinma, Katsina State |
| 1828 | KT/0067 | Maternal and Children Hospital                  | Kafur Road. Malumfashi                                                           |
| 1829 | KT/0068 | K Dara Specialist Clinic Limited                | Gidan Dawa                                                                       |
| 1830 | KT/0069 | Umaru Musa Yar'adua University Health Centre    | Dustinma Road, Katsina                                                           |
| 1831 | KT/0070 | Turai Umar Yar'Adua Maternity Children Hospital | Gidan Dawa off Hassan Usman Katsina Road, Katsina                                |
| 1832 | KT/0072 | Albarka Clinic & Maternity                      | Ali Cinema Malumfashi, (Tinglin Area) Katsina State                              |
| 1833 | KT/0073 | General Hospital Musawa                         | Hospital Rd, Shaishawu Musawa, Katsina                                           |
| 1834 | KT/0075 | St Vincent Catholic Church                      | Along Funtua Road, Gidan Dawa, Malumfashi, Katsina State                         |
| 1835 | KT/0076 | Alheri Clinic                                   | Lawrence Onoja Road, Kofar Kaura, New Layout katsina, Katsina State              |
| 1836 | KT/0078 | AJS Ultra Modern Clinic And Diagnostic Center   | No. 37 Daura Street K- Kaura Layout Katsina, Katsina State                       |
| 1837 | KT/0079 | National Obstetric Fistula Center               | Babbar Ruga Katsina, Katsina State.                                              |
| 1838 | KT/0081 | Labmina Maternal And Child.                     | Kofar Kaura New Lay Out Katsina, Katsina State                                   |

|      |         |                                                 |                                                           |
|------|---------|-------------------------------------------------|-----------------------------------------------------------|
| 1839 | KT/0082 | Katsina State Orthopaedic & Speciality Hospital | Dutsinma Road, Katsina                                    |
| 1840 | KT/0083 | General Hospital Jibia                          | Hayin-gada Jibia LGA                                      |
| 1841 | KW/0001 | Temitope Hospital                               | Sabo Line Isale, Off Amilegbe Road, Ilorin                |
| 1842 | KW/0002 | Ola Olu Hospital                                | Opp. International Tobacco Coy. Garrage Offa Road, Ilorin |
| 1843 | KW/0004 | Ilorin Clinics & Maternity Hospital             | 163, Alimi Road, Isale Alore/Abata, Ologe, Ilorin         |
| 1844 | KW/0005 | Eyitayo Hospital                                | No. 40, Ojo-Iya Road, Ilorin                              |
| 1845 | KW/0006 | Oorelope Hospital                               | No. 30, Opo-Malu Road, Ilorin, Kwara State                |
| 1846 | KW/0007 | Life Care Hospital                              | No. 55 Gaa-Akanbi Road, Ilorin                            |
| 1847 | KW/0012 | Olalomi Hospital - Ilorin                       | Stadium Road, Ilorin                                      |
| 1848 | KW/0013 | Cottage Hospital                                | Ajase Ipo, Ilorin                                         |
| 1849 | KW/0014 | Abiye Maternity Hospital                        | Ganmo, Ilorin                                             |
| 1850 | KW/0015 | Omolola Hospital                                | Opp. Govt. Sec. School, Along Jebba Road, Ilorin.         |
| 1851 | KW/0019 | Fogofolu Hospital & Mat. Centre                 | No.12 Shofoluew Street, Sabo-Oke, Ilorin                  |
| 1852 | KW/0020 | Sobi Specialist Hospital                        | Alagbado Okelele, Ilorin                                  |
| 1853 | KW/0024 | Olarewaju Hospital                              | Oro Ago Close Ilorin                                      |
| 1854 | KW/0025 | Wale Clinic & Maternity                         | Offa.                                                     |
| 1855 | KW/0027 | University Teaching Hospital Ilorin             | Ilorin, Lagos Road, Ilorin                                |
| 1856 | KW/0028 | Delniks Hospital                                | Oja Iya Off University Road, Ilorin                       |
| 1857 | KW/0029 | Oyin Folorunsho                                 | Tanke Bubu Off University Road, Ilorin                    |
| 1858 | KW/0030 | Femis Hospital                                  | Plot 7, Femis Close, off New Yidi Road, Ilorin            |
| 1859 | KW/0031 | Aisat Memorial Hospital                         | Off. Jaigbade Residence, Itamerin, Ilorin                 |
| 1860 | KW/0032 | General Hospital, Omuaran                       | Omuaran                                                   |
| 1861 | KW/0033 | Jebba Specialist Hospital                       | Jebba                                                     |
| 1862 | KW/0035 | Airport Clinic                                  | Eyenkorin Road, Ilorin                                    |
| 1863 | KW/0036 | General Hospital, Pategi                        | Pategi, Ilorin                                            |
| 1864 | KW/0037 | Abanise Lolu Hospital                           | Oke Agodi Aromaradu Adeta, Ilorin                         |
| 1865 | KW/0038 | Kiddiz Clinic                                   | Eastern Reservoirs, Olorunshogo, Ilorin                   |
| 1866 | KW/0039 | Sadiku Hospital                                 | 16, Abdulwahab Folawuyo, Unity Road, Ilorin               |
| 1867 | KW/0041 | Tobi Hospital                                   | Opp. Stadium Shopping Complex, Ilorin                     |
| 1868 | KW/0042 | Sabo-Oke Medical Centre                         | 12, Fufu/Okafor Street, Sabo-Oke, Ilorin                  |
| 1869 | KW/0044 | Adeyemo Hospital                                | Omu-aran, Kwara State                                     |
| 1870 | KW/0045 | Central Clinic                                  | Lafiaji Road, Tsaraji, Kwara State                        |
| 1871 | KW/0046 | Tolulope Clinic & Maternity                     | Off Abdullahi Mo''Hd Road, Tanke Iliwe, Ilorin            |
| 1872 | KW/0048 | Anchormed Hospital                              | University Road, Tanke, Ilorin                            |

|      |         |                                              |                                                      |
|------|---------|----------------------------------------------|------------------------------------------------------|
| 1873 | KW/0049 | Ela Memorial Medical Centre                  | Near Basin Gate, Ilorin                              |
| 1874 | KW/0050 | ECWA Hospital                                | Omu-Aran                                             |
| 1875 | KW/0051 | Surulere Medical Centre                      | Off Taiwo Road, Ilorin                               |
| 1876 | KW/0052 | Kosemani Hospital                            | Emirs Road, Ilorin                                   |
| 1877 | KW/0054 | General Hospital, Erin-lie                   | Erin-lie                                             |
| 1878 | KW/0063 | Ola-Olu Hospital                             | Opposite Int. Tobacco Coy, Garrage Offa Road, Ilorin |
| 1879 | KW/0085 | DSS Clinic                                   | Ilorin, Kwara State                                  |
| 1880 | KW/0086 | 227 WG Medical Centre                        | NAF Station, Ilorin, Kwara State                     |
| 1881 | KW/0087 | Specialist Hospital, Offa                    | Offa Town, Kwara State                               |
| 1882 | KW/0089 | Ajisafe Hospital                             | GRA Road, Agana Area, Omuaran, Kwara State           |
| 1883 | KW/0091 | Garin Alimi Hospital                         | 283, Umaru Saro Road, Ilorin                         |
| 1884 | KW/0093 | 222 LTK BN MRS, Ilorin                       | Ilorin, Kwara State                                  |
| 1885 | KW/0094 | University of Ilorin Health Centre           | Ilorin, Kwara State                                  |
| 1886 | KW/0097 | Cottage Hospital/Comprehensive Health Centre | Kwara State Police Command, Ilorin, Kwara State      |
| 1887 | KW/0100 | Amao Megida Hospital                         | No 16 Sokoto Rd, Sabo-Oke, Ilorin                    |
| 1888 | KW/0101 | Sarfam Medical Centre                        | No 34 Fate Rd, Ilorin                                |
| 1889 | KW/0102 | Ore Ofe Clinic & Maternity                   | Isale-Maliki Street, Balogun Funlani Ilorin          |
| 1890 | KW/0104 | Oluseyi Hospital                             | Ajase Ipo                                            |
| 1891 | KW/0106 | Shallom Clinic & Maternity                   | Bode-Saadu                                           |
| 1892 | KW/0107 | Olufolarin Okoro Memorial Hospital           | No 78, Agbo Oba Rd Ilorin                            |
| 1893 | KW/0109 | Rolakim Hospital                             | Opposite St Clares Grammar School, Offa              |
| 1894 | KW/0110 | Olalomi Hospital - Offa                      | Irra Rd offa                                         |
| 1895 | KW/0111 | Royal Care Hospital                          | No 1 Ponyan Rd NNPC Pipeline Gaa-Akanbi Ilorin       |
| 1896 | KW/0113 | General Hospital Lafiagi                     | General Hospital Lafiagi                             |
| 1897 | KW/0114 | General Hospital Kiama                       | General Hospital Kiama                               |
| 1898 | KW/0136 | Federal Polytechnic Medical Centre, Offa     | Offa, Kwara State                                    |
| 1899 | KW/0137 | NEW ERA HOSPITAL                             | OSI                                                  |
| 1900 | KW/0138 | CIVIL SERVICE HOSPITAL                       | ILOFA ROAD, ILORIN                                   |
| 1901 | KW/0139 | General Hospital, Share                      | Share                                                |
| 1902 | KW/0140 | UITH COMPREHENSIVE HEALTH CENTRE             | ESIE                                                 |
| 1903 | KW/0141 | ADEWOLE COTTAGE HOSPITAL                     | ADEWOLE RD, ALONG YEBMOT HOTEL, ILORIN               |
| 1904 | KW/0144 | OLUTAYO CLINIC & MATERNITY                   | SANGO, ILORIN                                        |
| 1905 | KW/0145 | IRETI CLINIC & MAT.                          | 24A COCA-COLA RD, OFF UNITY RD, ILORIN               |
| 1906 | KW/0146 | OMOSEBI HOSPITAL                             | GAA AKAMBI ILORIN                                    |
| 1907 | KW/0147 | CHILDREN SPECIALIST HOSP.                    | CENTRE GBORO                                         |
| 1908 | KW/0148 | AJIKOBI COTTAGE HOSP.                        | OKEKE, ILORIN                                        |
| 1909 | KW/0162 | Ibukun Faith Clinic & Maternity              | Olorunsogo Danialu Upper Gua Akanbi Road, Ilorin     |
| 1910 | KW/0163 | St Brendan's Catholic Mission                | Ahmadu Bello Way, Bacita                             |
| 1911 | KW/0164 | Ogo-Oluwa Hospital                           | Ahmadu Bello Way, Bacita                             |
| 1912 | KW/0168 | NNSHS Sick Bay                               | Offa                                                 |
| 1913 | KW/0169 | Ayoade Hospital                              | Olorunsogo, Gaa Akanbi, Ilorin                       |

|      |         |                                         |                                                                                                            |
|------|---------|-----------------------------------------|------------------------------------------------------------------------------------------------------------|
| 1914 | KW/0170 | Ona Ara Hospital                        | 7, Agunbiade Street, Sango, Ilorin                                                                         |
| 1915 | KW/0171 | Cottage Hospital                        | Lade                                                                                                       |
| 1916 | KW/0173 | Olupelu Clinic and Maternity            | Itaamo via Pakata, Ilorin                                                                                  |
| 1917 | KW/0174 | Yegun Clinic and Maternity              | 1, Hospital Road, Pategi                                                                                   |
| 1918 | KW/0175 | Ifeolu Clinic and Maternity             | Gaa Akanbi Roundabout, Ilorin                                                                              |
| 1919 | KW/0176 | Crescent Gold Crown Hospital            | Behind Mark Petrol Station, Tanke, Ilorin                                                                  |
| 1920 | KW/0177 | 22 BDE MC, Ilorin                       | 22 Brigade, Sobi Barracks, Ilorin, Kwara state                                                             |
| 1921 | KW/0178 | Oko Medical Centre                      | Idofin Road, Oko                                                                                           |
| 1922 | KW/0179 | Balm Hospital                           | 296 Bishop Street, GRA Ilorin                                                                              |
| 1923 | KW/0180 | Hauwa Memorial Hospital                 | Gure Town                                                                                                  |
| 1924 | KW/0181 | Folorunsho Hospital                     | Oke Odo, Erinle, Kwara State                                                                               |
| 1925 | KW/0182 | Olalomi Hospital                        | Along Ira Road, Offa, Kwara State                                                                          |
| 1926 | KW/0184 | Arewa Clinic & Maternity                | 87 Alimi (Kaiama) Road, Popo Igbona Area, Ilorin, Kwara State                                              |
| 1927 | KW/0185 | Al Mubeen Clinic and Maternity          | 5, Aiyetoro Gbede Lane, Off Sodiq Sulyman Road, Beside Deeper Life Church, Fate, Ilorin, Kwara State       |
| 1928 | KW/0186 | Al Barka Hospital                       | Ajase Ipo Road, Olunlade Area Ilorin, Kwara State                                                          |
| 1929 | KW/0187 | Emmanuel Hospital                       | Km 3, JEBBA-ILORIN Road, Jebba, Kwara State                                                                |
| 1930 | KW/0188 | An-Nusra Hospital                       | Along Tasso Road, Yanri, Kwara State                                                                       |
| 1931 | KW/0189 | Ilera Layo Medical Centre               | Aboto Oja, Abota Oja, Kwara State                                                                          |
| 1932 | KW/0190 | Landmark University Medical Centre      | Landmark University, Omuaran, Kwara State                                                                  |
| 1933 | KW/0191 | Notre Dame Medical Centre               | Along Kabba Kajola Road, Amoyo Town, Kwara State                                                           |
| 1934 | KW/0192 | Nakowa Medical Centre                   | 12 Kafanchan Rd, Adjacent God Grace Nursery & Primary School, Kulende Estate Phase II, Ilorin, Kwara State |
| 1935 | KW/0193 | Rapha Clinic & Maternity                | Patigi, Kwara State                                                                                        |
| 1936 | KW/0194 | Springsway Clinic & Maternity           | Opposite Ministry of Social Development, Juvenile Remand Home, Oko-Era, Kwara State                        |
| 1937 | KW/0195 | St. Cyprian Catholic Clinic & Maternity | Omolabi Street, Off Iraa Road, Offa, Kwara State                                                           |
| 1938 | KW/0196 | Oyebamiji Central Hospital              | 20, Kontangora Road, Off Taiwo Road (Beside Ajoke Nur./Pri. School), Ilorin, Kwara State                   |
| 1939 | KW/0197 | Tim Hospital                            | 3, Olukade Close, off Abikan Street, Isale-Aluko, Ilorin, Kwara State                                      |

|      |         |                                    |                                                                                              |
|------|---------|------------------------------------|----------------------------------------------------------------------------------------------|
| 1940 | KW/0198 | Yusjib Industrial Medicare         | 35, Ajase Ipo Road, (opposite Oando filling station, offa garage), Ilorin, Kwara State       |
| 1941 | KW/0199 | Midland Fertility Center           | 12 Kano Road, Adewole Estate, Ilorin, Kwara State                                            |
| 1942 | KW/0200 | Housewife Clinic & Maternity       | Majeobaje Street, Lamodi Area, Offa, Kwara State                                             |
| 1943 | KW/0201 | Khadijat Memorial Hospital         | Annex 1, Kulende Housing Estate Junction, Beside, Imam Petroleum, Sango, Ilorin, Kwara State |
| 1944 | KW/0202 | Omolewa Hospital                   | Gaa Odota, Ilorin, Kwara State                                                               |
| 1945 | KW/0203 | Onome Clinic and Maternity         | 1a, Ijakadi Street, off Secretariat Roas, Orita Merin, Offa, Kwara State                     |
| 1946 | KW/0204 | Life Fount Hospita                 | University Road, Beside Overcomer's Church, Tanke, Ilorin Kwara State                        |
| 1947 | KW/0205 | E-Sqaure Clinic and Maternity      | Olayinka House, Opposite Musco Filling Station, Oke-Ola, Oro, Kwara State                    |
| 1948 | KW/0207 | CHL Healthcare Services            | Comprehensive Heealthcare, Lamodi Area, Offa, Kwara State                                    |
| 1949 | KW/0208 | Adualere Tosho Clinic Maternity    | No. 3, Adualere Near Goye Church, Ilorin.                                                    |
| 1950 | KW/0209 | Group Medical Centre               | Pipeline Road, Tanke Ilorin, Kwara State.                                                    |
| 1951 | KW/0210 | Iyanu- Olu Clinic And Maternity    | No. 1 Ilupeju Street, Off Basin Road Ilorin, Kwara State.                                    |
| 1952 | KW/0212 | Akorede Clinic And Maternity       | Opp. Ilorin International Airport Egbejila Junction, Ilorin, Kwara State                     |
| 1953 | KW/0213 | Akanji Memorial Hospital           | 136 Sobi Road Ilorin, Kwara State                                                            |
| 1954 | KW/0214 | General Hospital Ilorin            | Abdulazeez Attah Road Ilorin, Kwara State                                                    |
| 1955 | KW/0215 | Dayspring Medical Centre           | No. 97, University Road, Tanke Ilorin, Kwara State                                           |
| 1956 | KW/0216 | First Bisdem Hospital              | No. 3 John Oyewole Street, Off Eastern Reservior, Tanke Ilorin, Kwara State                  |
| 1957 | KW/0217 | Adeyi Hospital                     | 214 Oba Mama Road Ilorin, Kwara State                                                        |
| 1958 | KW/0218 | Alafia Tayo Hospital               | Tinu Street, Akerebiata Ilorin, Kwara State                                                  |
| 1959 | KW/0219 | Mimtaaz Hospital                   | Apalara Area, Behind Police Post Ilorin, Kwara State                                         |
| 1960 | LA/0001 | Prince & Princess Hospital, Egbeda | Plot 75. 12th Road Gowon Estate Egbeda, Lagos                                                |
| 1961 | LA/0002 | Talent Specialist Hospital         | Plot 440 4th Avenue, Gowon Estate, Egbeda, Lagos                                             |



|      |         |                                            |                                                                                      |
|------|---------|--------------------------------------------|--------------------------------------------------------------------------------------|
| 1962 | LA/0004 | Barbinton Medical Centre, ketu             | No. 9 Samuel Anibaba Street Iyana School Bus Stop Ketu Lagos                         |
| 1963 | LA/0006 | St.Claver Hospital                         | Plot 780, Somide Odujirin Avenue, near Skye Bank, Omole Phase II, Berger Area, Lagos |
| 1964 | LA/0007 | Deji Clinic                                | No. 56, Agbado Road, Toko Taya Bus Stop, Iju-Ishaga, Lagos                           |
| 1965 | LA/0010 | Osuntuyi Medical Center, iju_ishaga        | 255 Iju Rd, Balogun B/Stop, Iju-Ishaga                                               |
| 1966 | LA/0012 | General Hospital, Orile-Agege              | Orile-Agege                                                                          |
| 1967 | LA/0013 | St. Thomas's Hosp. Ifako-Agege             | 17, Awoni Murphy Street, Itako, Agege, Lagos.                                        |
| 1968 | LA/0014 | Betta Hospitals Ltd.                       | 9-11 Coker Street, Ipaja Road, Agege, Lagos                                          |
| 1969 | LA/0016 | All Souls Infirmery Hospital & Mat. Centre | No. 8 Church Street, Elere, Agege, Lagos.                                            |
| 1970 | LA/0017 | Mucas Hospital                             | 19 Ogun Str., Adeolu Bus Stop, Dopemu, Agege, Lagos.                                 |
| 1971 | LA/0018 | Masol Hospital Clinic & Mat. Home          | 8, Kola Akinlade Str., off Akinsegun Rd., Jesu Oseun, Abule Egba, Lagos              |
| 1972 | LA/0036 | Ajeromi General Hospital                   | Awodi-Ora Ajegunle                                                                   |
| 1973 | LA/0037 | Prince & Princess Hospital                 | 191 Ojo Road, Ligoli Bus Stop, Ajegunle, Lagos.                                      |
| 1974 | LA/0038 | All Soul's Clinics Ltd                     | No. 235 Ojo Road, Ajegunle, Lagos                                                    |
| 1975 | LA/0041 | Convenant Conception Hospital              | No. 9 Illiasu Road Ikotun-Egbe Lagos                                                 |
| 1976 | LA/0042 | Mount Sina'I Hospital - Egbe               | 105, Isolo Road , Egbe Lagos                                                         |
| 1977 | LA/0044 | Elf Foundation Mother & Child Clinic       | Alimosho L.G. Ikotun Lagos                                                           |
| 1978 | LA/0045 | Broad Hospital & Materinty                 | 17 Fehintola Street , Off Isijola Street Ikotun Lagos                                |
| 1979 | LA/0046 | Zenith Medical Centre                      | 1. Adeyefa Street. Off Abeokuta Exp. Iyana-Paja                                      |
| 1980 | LA/0047 | Veta Hospital Ltd.                         | 1, Veta Close, Araromi Bus Stop Abeokuta Expressway Iyana-Paja Lagos                 |
| 1981 | LA/0057 | Shepherd Specialist Hospital               | 2nd Avenue 23 Road, T Close House 38, Festac , Lagos                                 |
| 1982 | LA/0059 | First Faith Med. Centre Ltd.               | 2, Kekere Ekun Str., Orile Iganmu, Lagos.                                            |
| 1983 | LA/0060 | Grayma Medical Centre                      | 27, Amai Street, Off Alafia Bus Stop, Along Lagos-Badagry expressway(Km 3), Lagos.   |
| 1984 | LA/0061 | Praise Medical Centre, Festac.             | 3rd Avenue O'' Close House 2, Festac Town, Lagos.                                    |
| 1985 | LA/0062 | St. Anthony's Medical Centre               | 19 Badagry Expressway, Festac Town, Lagos                                            |
| 1986 | LA/0063 | Hova's Place Hospital & Clinic             | House 23, T Close, 5th Avenue, Festac Town, Lagos                                    |

|      |         |                                         |                                                               |
|------|---------|-----------------------------------------|---------------------------------------------------------------|
| 1987 | LA/0065 | Palm Beach Foundation Hospital Ltd.     | 157 Old Ojo Road, Amuwo Odofin, Festac Town, Lagos            |
| 1988 | LA/0079 | La Saplenza Hospital Ltd.               | 2nd Ave, 21 Road D Close House 15 Festac Town Lagos           |
| 1989 | LA/0080 | St. Jude's Hospital                     | 21 Road, B Close, House 3, Festac Town                        |
| 1990 | LA/0081 | Royal Oak Hospital                      | 21 Rd C Close House 24 Festac Town, Lagos                     |
| 1991 | LA/0082 | Ituah Hospital Ltd.                     | 512 Road J. Close Festac Town Lagos                           |
| 1992 | LA/0083 | God's Power Clinic Hosp. & Mat.         | 321 Road C. Close House 7. Festac Town Lagos                  |
| 1993 | LA/0085 | Emel Hospital                           | 21 Road Z Close, Festac Town                                  |
| 1994 | LA/0086 | AMC Hospital                            | House 19, Dubar Road, Mile 2, Lagos                           |
| 1995 | LA/0087 | Cedar Group Hospital                    | 208 Road, D Close, FHA, Festac Town, Lagos                    |
| 1996 | LA/0088 | Lagoon Hospital, Apapa                  | 8 Marine Road , Apapa Lagos                                   |
| 1997 | LA/0090 | Dako Medical Centre (Hosp. & Mat. Home) | 225b Kirikiri Rd., Trinity Bus Stop, Olodi, Apapa, Lagos.     |
| 1998 | LA/0093 | Abbey Medical Centre                    | 74 Idewu Street, Olodi, Apapa, Lagos                          |
| 1999 | LA/0094 | Sonex Clinics Ltd. (Hosp. & Mat.)       | 5b Emordi Street, Olodi, Apapa, Lagos.                        |
| 2000 | LA/0096 | Ostard Hospital & Mat. Home             | 161, Idewu Street, Olodi, Apapa, Lagos.                       |
| 2001 | LA/0097 | Faleti Medical Centre                   | 204, Kirikiri Road, Trinity B/Stop, Olodi, Apapa, Lagos.      |
| 2002 | LA/0099 | Iduna Specialist Hospital               | 1a, Takorodi Road, Gra, Apapa, Lagos.                         |
| 2003 | LA/0100 | Heda Hospital Group                     | No 2A, Princess Aina jegede close, Ajao Estate, Apapa, Lagos. |
| 2004 | LA/0101 | Christ Medical Centre                   | 28 Randle Road, Apapa, Lagos                                  |
| 2005 | LA/0102 | Hilton Hospital                         | 2 Berger Street, Olodi, Apapa, Lagos.                         |
| 2006 | LA/0111 | General Hospital, Badagry               | Badagry                                                       |
| 2007 | LA/0112 | Grace-Land Medical Center               | 147, Badagry Expressway                                       |
| 2008 | LA/0125 | General Hospital, Epe                   | Epe                                                           |
| 2009 | LA/0134 | Doren Specialist Hospital               | 1 Kemfat Road , Thomas Village, Lekki.                        |
| 2010 | LA/0135 | Kings Hospital                          | 39 Mashalashi Street off Keffi Road, Obalende, Ikoyi          |
| 2011 | LA/0136 | Gold Cross Hospital                     | 17B Bourdillon Road, Ikoyi                                    |
| 2012 | LA/0138 | Cosmoderm Medical Centre                | 202, Awolowo Road, Folomo, Ikoyi, Lagos.                      |
| 2013 | LA/0143 | J-Rapha Hospital                        | 40 Ado Lamgbasa Road, Ajah,                                   |
| 2014 | LA/0144 | Shalom Hospital Of Int'L Check Up Ltd.  | Off Admirally Way, Off Wale Ariyo Street, Lekki, Lagos.       |
| 2015 | LA/0145 | Germaine Health Centre                  | Km 63 Lagos/Epe Expressway, Lekki, Lagos.                     |

|      |         |                                            |                                                                       |
|------|---------|--------------------------------------------|-----------------------------------------------------------------------|
| 2016 | LA/0146 | Magbon Alade Medical Centre                | 1, Okeowo Ave, Magbon Alade Town, Lekki, Lagos                        |
| 2017 | LA/0147 | The Peninsular Hospital                    | Km 23, Lagos Expressway, Ikota, Lekki, Lagos                          |
| 2018 | LA/0148 | Havilah Hospital                           | Havilah Bus Stop, Ajah - Adoh Road Opp. Dredging Site, Ajah           |
| 2019 | LA/0150 | Udeco Medical Centre                       | Plot 39, 36 Udeco Medical Road off Chevron Drive, Chevy Estate, Lekki |
| 2020 | LA/0151 | The Royal Infirmary Hospital               | Badore Road, Off Ajah - Addo Road                                     |
| 2021 | LA/0164 | Olatunbosun Convalescent & Mat. Home       | 2, Olatunbosun Close, Egbededo Obadeyi B/Stop Ijaye                   |
| 2022 | LA/0165 | Uptown Medical Centre                      | 60 Agbado Road, Ijaiye Ojokoro near Bukinsheen Int'l School           |
| 2023 | LA/0170 | The Shepered Medical Center (For Children) | Ikeja-Lagos                                                           |
| 2024 | LA/0173 | Yima Clinic                                | No. 107 Ogudu Rd, Ojota                                               |
| 2025 | LA/0174 | Eko Hospital, Ikeja                        | 31, Mobolaji Bank, Anthony Way Ikeja                                  |
| 2026 | LA/0175 | Allison Memorial Clinc                     | Plot 330 Adeyemo Akakpo St. Omole                                     |
| 2027 | LA/0176 | Bodet Medicare & Maternity                 | 6/8 Odewale St. Alausa, Ikeja                                         |
| 2028 | LA/0177 | Brafus Specialist Hospital                 | 1b Ajayi Road, Ogba                                                   |
| 2029 | LA/0178 | Ezekiel Medical Centre                     | 55 Oduduwa Crescent                                                   |
| 2030 | LA/0179 | St. Leo's Catholic Clinic                  | C/O Catholic Church,10 Toyin Str. Ikeja                               |
| 2031 | LA/0181 | Life Support Medical Center                | 1, Oba Docemo Street G.R.A Ikeja, Lagos.                              |
| 2032 | LA/0182 | St. Ives Medical Centre                    | 90 Opebi Rd. Ikeja                                                    |
| 2033 | LA/0183 | Foly Clinic                                | 3 Julius Showunmi Str. Shogunle                                       |
| 2034 | LA/0184 | Fasanmi Clinic And Maternity               | 5/7 Olori Str. Shogunle Ikeja                                         |
| 2035 | LA/0186 | Ikeja Medical Centre                       | 11 Ogun Modede Street Off, Allen Avenue , Ikeja                       |
| 2036 | LA/0187 | Holy Trinity Hospital                      | 1108 Awolowo Way Ikeja Lagos                                          |
| 2037 | LA/0189 | County Hospital Ltd.                       | 41-45 Isheri Road Ogba Ikeja Lagos                                    |
| 2038 | LA/0190 | Motayo Hospital Limited                    | 3. Owodumi Street, Off Toyin Street Ikeja Lagos                       |
| 2039 | LA/0191 | CRI Medi Clinics - Ikeja                   | Ikeja Opearations Hq Ngb Building 144 Oba Akran Avenue Ikeja          |
| 2040 | LA/0192 | Queens Specialist Hospital Ltd             | 3B CMD Road, Magodo GRA                                               |
| 2041 | LA/0194 | Hugo Medical Centre                        | 3, Johnson Street, Off Awolowo Way, Ikeja, Lagos                      |
| 2042 | LA/0196 | Triumph Medical Centre                     | 32, Unity Road, Ikeja, Lagos.                                         |
| 2043 | LA/0198 | June-One Clinic                            | 52, Opebi Road, Ikeja, Lagos                                          |
| 2044 | LA/0200 | Shoreman Medical Centre                    | 31, Olowu Street, Ikeja, Lagos                                        |
| 2045 | LA/0201 | Estate Clinic & Holy Trinity Hospital      | 110b Awolowo Way, Ikeja, Lagos                                        |

|      |         |                                              |                                                                                   |
|------|---------|----------------------------------------------|-----------------------------------------------------------------------------------|
| 2046 | LA/0203 | Ebenezer-Thomas Clinic                       | 34a, Aba Johnson Cresc. Off Adeniyi Jones Adekunle Village,                       |
| 2047 | LA/0237 | New-Gate Hospital                            | 59 Ikorodu                                                                        |
| 2048 | LA/0238 | General Hospital, Ikorodu                    | Ikorodu, Lagos                                                                    |
| 2049 | LA/0239 | Ikorodu Hospital & Clinic.                   | 9, Muniratu Alojo Street, Off Lagos Road By Afribank, Ikorodu                     |
| 2050 | LA/0240 | Idera Hospital Group                         | Ebute Metta Branch, Off Ojogbe Bus Stop, Ikorodu, Lagos.                          |
| 2051 | LA/0251 | Deji Clinic Ltd.                             | 19 Demurin Street, Catop Chicken George Ketu Lagos                                |
| 2052 | LA/0252 | Ayo Clinic                                   | No. 8 Alapere Street , Ketu Lagos                                                 |
| 2053 | LA/0253 | Zion Medical Centre                          | No. 6 Visa Omotunde Street Off Elebiju Road Ketu Lagos                            |
| 2054 | LA/0254 | Gloria Hospital                              | 9, Oladeinde Str., Anthony Village                                                |
| 2055 | LA/0256 | Life Fountain Medical Clinic                 | 45, Oyedele Ogunniyi Str. Anthony Village                                         |
| 2056 | LA/0258 | Royal Rapha Clinic                           | 4, First Avenue Maryland                                                          |
| 2057 | LA/0259 | Folarin Fountain Hospital & Maternity Home   | 7, Emmanuel street, Maryland, Jesu Oyingbo complex, behind Mobil/Mr Biggs, Ikeja. |
| 2058 | LA/0265 | Med-In Specialist Hospital                   | 1, Osugbo Street Ogudu, Kosofe                                                    |
| 2059 | LA/0266 | Mount Sinai Special. Clinic                  | 19a Military Str. Onikan Lagos                                                    |
| 2060 | LA/0267 | Avon Medical Services Limited                | 3rd Floor, West Wing City Hall, Catholic Mission Street, Lagos                    |
| 2061 | LA/0268 | Longing Medical Centre                       | 1 Josepha Close, Off Ogundeji Oguntona St, By Ajala Bus Stop, Ijaiye Ojokoro      |
| 2062 | LA/0269 | Good Faith Clinic                            | 19, Ojo-Giwa Street, Off Idumagbo Avenue, Lagos.                                  |
| 2063 | LA/0270 | Ajike-Sanda Memorial Medical Centre          | 54, Adeniji Adele Street, Lagos.                                                  |
| 2064 | LA/0274 | St. Stephen's Hospital                       | 17/19 Glover Street, Ebute-Metta                                                  |
| 2065 | LA/0275 | St. Paul's Hospital & Maternity Centre       | 71a Ondo Street (East), Ebute Metta                                               |
| 2066 | LA/0277 | Mount Sinai Hospital - Ebute Metta           | 177, Borno Way, Ebute Metta                                                       |
| 2067 | LA/0279 | Federal Medical Centre - Ebute Metta         | PMB 1097, Ebute-Metta                                                             |
| 2068 | LA/0281 | Lagos Mainland Hospital                      | Abule-Oja, Yaba                                                                   |
| 2069 | LA/0282 | St. Stevens Hospital Limited                 | 16, Majekodunmi Street, Maboju-Shogunle                                           |
| 2070 | LA/0283 | Nigerian Railway Hospital                    | Ebute Metta,                                                                      |
| 2071 | LA/0285 | Mt. Sinai Hospital                           | 177 Borno Way, Ebute Metta                                                        |
| 2072 | LA/0287 | Lobel Hospital                               | No. 1b Kufeju Street, Alagomeji, Yaba, Lagos                                      |
| 2073 | LA/0288 | St. Luke's Hospital                          | 18 Commercial Avenue, Sabo, Yaba, Lagos.                                          |
| 2074 | LA/0289 | Psychiatric Hospital(Community/Staff Clinic) | Yaba, Lagos                                                                       |
| 2075 | LA/0290 | Noble Hospital & Maternity Centre            | 340, Borno Way, Alagomeje, Yaba, Lagos.                                           |
| 2076 | LA/0291 | Marien Clinic                                | 7, Montgomery Road, Yaba, Lagos                                                   |

|      |         |                                        |                                                                                     |
|------|---------|----------------------------------------|-------------------------------------------------------------------------------------|
| 2077 | LA/0305 | Ebenezer Specialist Hospital           | 355 Agege Motor Road Challenge B/Stop, Mushin                                       |
| 2078 | LA/0306 | Ultima Medical Hospital                | 3. Cappa Avenue Palmgrove Estate Mushin Lagos                                       |
| 2079 | LA/0307 | Lumico Medical Centre                  | 8 Folario Street Mushin Lagos                                                       |
| 2080 | LA/0308 | Nusamin Clinc & Maternity Hospital     | 1A & 1B Akintola Close Behind LUTH, Mushin Lagos                                    |
| 2081 | LA/0309 | St. Claire Hospital                    | 44 Alh. Mush Street Papa Ajao Mushin Lagos                                          |
| 2082 | LA/0310 | Mount Sinai Hospital - Mushin          | 32 Olanubi Street, Papa Ajao. Mushin Lagos                                          |
| 2083 | LA/0311 | Hillstar Clinics                       | 98 Palm Avenue Papa Ajao, Mushin Lagos                                              |
| 2084 | LA/0312 | AK Oyekan Hospital                     | 2. Bishop St. Moshalashi Idi-Oro. Mushin Lagos                                      |
| 2085 | LA/0313 | May Clinics Limited                    | Doxology House, 24/26 Sadiku Street Ilasamaja, Off Isolo Express                    |
| 2086 | LA/0314 | Summit Hospital & Maternity Home       | 5 Summit Close, Off Mosalashi B/Stop                                                |
| 2087 | LA/0316 | First Shadrach's Hospital & Mat. Home  | 8, Assoc. Avenue, Illupeju, Lagos.                                                  |
| 2088 | LA/0318 | Model Medical Centre                   | 3, Wilmer Str. Off Town Planning Way, Illupeju, Lagos.                              |
| 2089 | LA/0320 | Iyalode Bisoye Tejuoso Hospital        | 18-20 Illupeju Bye-Pass Road, Illupeju, Lagos.                                      |
| 2090 | LA/0322 | May Hospital Illupeju                  | 20, Sura Mogaji Street, Off Coker Road, Illupeju, Lagos.                            |
| 2091 | LA/0323 | Ufuoma Specialist Hospital & Mat.      | 23, Obalodu Street, Illupeju Estate, Lagos.                                         |
| 2092 | LA/0325 | Tabernacle Clinics                     | 15, Ibadan Street, Ilasamaja, Lagos                                                 |
| 2093 | LA/0332 | Kiladejo Hospital & Specialist Clinics | 15ppl Road Off Ppl Bus Stop Badagry Expressway Lagos                                |
| 2094 | LA/0333 | Fellowship Clinics                     | 16,Dada Street,Off Ojo Alaba Int'l Mkt. Road,Beside Ojo LG. Secretariat, Ojo, Lagos |
| 2095 | LA/0334 | Sabo Crown Hospital & Maternity Home   | 1 Dr Chinwuba Anameje Street, beside Sabo-Oniba Primary Sch. Ojo-Igbede Road        |
| 2096 | LA/0335 | La Saplenza Hospital & Maternity Home. | 14,Adeyemi Street, Off Olojo Drive, Ojo                                             |
| 2097 | LA/0337 | Appleyard Medical Clinic               | Off Km 34, Lagos Badagry, Express Way                                               |
| 2098 | LA/0338 | Ibijola Medical Centre                 | 31 Badagry Exp/Way Lag.                                                             |
| 2099 | LA/0339 | Femola Hospital                        | 106, Olola Ring Road, Ijanikin                                                      |
| 2100 | LA/0349 | Prime Clinic                           | 2. Sunkanmi Awoyungbo Str. Ewu-Tutun Mofoluku Oshodi                                |
| 2101 | LA/0351 | Dolu Hospital                          | 7.Sunmola Abayomi Str. Motoluku Lagos                                               |

|      |         |                                        |                                                                  |
|------|---------|----------------------------------------|------------------------------------------------------------------|
| 2102 | LA/0353 | Edmac Medical Centre                   | 21 Samuel Street, Mafoloku Oshodi Lagos                          |
| 2103 | LA/0354 | Divine -Grace Medical Centre           | 3 Sobogun Rofa Street, Mafoloku-Oshodi                           |
| 2104 | LA/0355 | Holy Saviour Hosp. Clinic & Mat. Home  | 45/47 Mofoluku Road Garage Bus Stop, Oshodi                      |
| 2105 | LA/0357 | Geo Medical Centre                     | 12 Subairu Street, Ladipo Bus Stop, Sogunle                      |
| 2106 | LA/0358 | One Life Hospital Limited              | 485 Agege Motor Road, Bolade, Oshodi                             |
| 2107 | LA/0359 | St. Emmanuel Clinics & Hospital        | 2, Bola Ademuwon Street, Behind Aswani Market, Isolo             |
| 2108 | LA/0360 | Alpha Peace Medical Centre             | Kareem Street, Isolo Way, Isolo                                  |
| 2109 | LA/0361 | St. Raphael's Hospital Ltd.            | 9, Ago Okota Palace Way, Okota - Layout, Isolo Okota             |
| 2110 | LA/0362 | Kahn Specialist Hospital               | 30, Babs Aregbe Street, Off Dr Fasheun Street, Okota             |
| 2111 | LA/0363 | Bose Specialist Hospital               | 7, Ilori Street, Ire-Akari Estate, Isolo                         |
| 2112 | LA/0365 | Mount Pisgah Hospital Ltd.             | 140 Isolo Road, Egbe, Lagos State                                |
| 2113 | LA/0366 | Boyle Medical Centre                   | 1b Oyewole Way (Off Olufemi Peters) Ire Akari Estate, Isolo      |
| 2114 | LA/0367 | Lives Fountain Medicare                | 28, Godwin Omonua Street, Ire-Akari Estate, Isolo                |
| 2115 | LA/0368 | Bissalam Hospital Complex              | 4, Modupe Shita Street, Off Liasu Road, Egbe                     |
| 2116 | LA/0370 | General Hospital, Isolo                | Isolo, Lagos                                                     |
| 2117 | LA/0371 | Optimal Medical Centre, Oshodi         | 5a Adeyemo Street Off 7/8 B/Stop Mafoloku,                       |
| 2118 | LA/0372 | Labson Specialist Hospital & Mat. Home | 83 Bangbose Street, Campos Square, Lagos Island                  |
| 2119 | LA/0374 | CRI Mediclinic Lekki Vgc               | Plot 232 Road 1 Vgc Lekki Epc Expressway Lagos                   |
| 2120 | LA/0376 | Adonai Medical Centre                  | No. 36 Adekunle Kuye Street, Lagos.                              |
| 2121 | LA/0378 | Akinbolade Specialist Hospital         | 66, Badagry Expressway, Ojo, Lagos                               |
| 2122 | LA/0379 | Nuklius Specialist Clinic              | 104, Lewis Street, Obalende, Lagos.                              |
| 2123 | LA/0380 | Cyva Clinics Ltd                       | 14, Cyva Crescent, Finger Estate, Satellite Town, Lagos.         |
| 2124 | LA/0400 | Patela Hospital                        | 46 Johnson Street, Yaba, Lagos.                                  |
| 2125 | LA/0401 | Solbi Continental Hospital Ltd.        | 3, Fola Agoro Str., Off Abule Ijesha Str., Shomolu               |
| 2126 | LA/0402 | Medol Clinic                           | 54, Adaranyo Street, Famous B/Stop, (Opp Pedro Pri.Sch.) Shomolu |
| 2127 | LA/0403 | General Hospital Gbagada               | Gbagada                                                          |
| 2128 | LA/0404 | Jon-Ken Hospital                       | 61-65 Street, Finberr Rd, Akoka                                  |

|      |         |                                      |                                                                                   |
|------|---------|--------------------------------------|-----------------------------------------------------------------------------------|
| 2129 | LA/0408 | Obanle Aje Hospital & Mat. Home      | No. 24 Braimoh Street, Obanikoro, Lagos                                           |
| 2130 | LA/0416 | Jon-dental Clinic                    | 20, Shobande St., Akoka Yaba                                                      |
| 2131 | LA/0419 | Olukemi Hospital & Maternity         | 3, Silifatu Akinsanya Str. Off Omilani Str. Ijeshatedo                            |
| 2132 | LA/0421 | Providence Hospital                  | Plot 32 Western Avenue Alaka, Stadium, Lagos                                      |
| 2133 | LA/0422 | Patmos Clinic                        | 346 Herbert Macaulay Way Yaba                                                     |
| 2134 | LA/0426 | Providence Hospital                  | 2B Maduiké Street, off Raymond Njoku Street, SW Ikoyi, Lagos, Lagos.              |
| 2135 | LA/0428 | Rotfol Medical Centre                | 2, Gbaja Mark Flats, Surulere, Lagos.                                             |
| 2136 | LA/0429 | Olaniba Mem. Spec. Hospital          | 10a Olatunde Onimole Street, Surulere, Lagos                                      |
| 2137 | LA/0431 | Isioma Hospital                      | 28, Molusi Avenue Ikate, Surulere, Lagos                                          |
| 2138 | LA/0432 | Zolace Clinic                        | 18 Olukole Street, Off Ogunlana Drive, Surulere, Lagos.                           |
| 2139 | LA/0435 | Mercy Thomas Oredugba Medical Centre | 8, Mogaji Street, Aguda, Surulere, Lagos                                          |
| 2140 | LA/0438 | St. Luke's Medical Centre            | 61 Teniola Street off Adeshina Street, by Airways Link Road, Ijeshatedo, Surulere |
| 2141 | LA/0440 | A.B. Specialist Hospital Group       | 87, Randle Avenue, Surulere, Lagos                                                |
| 2142 | LA/0441 | The Comforter Hospital               | 20 Alh. Jinadu Street, Surulere, Lagos.                                           |
| 2143 | LA/0442 | First Cross Hospital                 | No. 2 Oshopishan Street, Surulere, Lagos.                                         |
| 2144 | LA/0443 | Toki Medical Centre                  | No. 3 Sabiu Ajose Crescent, Adeniran Ogunsaya, Surulere, Lag                      |
| 2145 | LA/0444 | Smith Medical Centre                 | 3 Eniasoro Beyioku Street, Surulere                                               |
| 2146 | LA/0447 | Model Specialist Hospital            | 5 Tafawa Balewa Crescent Off Adeniran Ogunsanya                                   |
| 2147 | LA/0448 | First Dominican Hospital Ltd         | 27, Alhaji Masha Road, Surulere, Lagos.                                           |
| 2148 | LA/0450 | Mezonel Hospital                     | 1 Adetola Street, Aguda-Surulere, Lagos.                                          |
| 2149 | LA/0452 | Alexander Memorial Hospital          | 79, Oduduwa Street, Ikate, Surulere, Lagos                                        |
| 2150 | LA/0454 | Prime Hospital                       | 40, Adelabu Street, Surulere, Lagos.                                              |
| 2151 | LA/0455 | Robertson Med. Centre                | 1-5 James Robertson Street, Surulere, Lagos                                       |
| 2152 | LA/0456 | Uwemedimo Hospital Ltd               | 19 Market Street, Ijesha - Surulere, Lagos                                        |
| 2153 | LA/0457 | New day Specialist Clinic Ltd.,      | 2, Ladele Street, Off Nnobi Street, Ikate, Surulere, Lagos                        |

|      |         |                                           |                                                                         |
|------|---------|-------------------------------------------|-------------------------------------------------------------------------|
| 2154 | LA/0458 | Shalom Hospital Ltd.                      | 4a, Mosumola Street, Aguda, Surulere, Lagos.                            |
| 2155 | LA/0459 | Remilekun Memorial Medical Centre         | 29A Itire Road, Surulere, Lagos                                         |
| 2156 | LA/0460 | Topaz Hospital                            | 12, Adeniyi Street, By Municipal Library, Lagos                         |
| 2157 | LA/0492 | Living Spring Hospital & Mat. Home        | 49, Alafia Avenue Off Afolabi Obe Street Ori-Oke B/Stop                 |
| 2158 | LA/0502 | BCL Clinic                                | 10, MacDonald Road, Ikoyi, Lagos                                        |
| 2159 | LA/0503 | SSA Clinic                                | Lagos                                                                   |
| 2160 | LA/0507 | 68 Nigerian Army Ref. Hosp.               | Myhoung Barracks, Yaba, Lagos                                           |
| 2161 | LA/0508 | Military Hospital or Creek Hospital       | Awolowo Road, Ikoyi, Lagos                                              |
| 2162 | LA/0509 | 81 Division Hospital                      | Dodan Barracks, Ikoyi, Lagos                                            |
| 2163 | LA/0510 | 445 Nigerian Airforce Hospital            | Sam Ewang Air Force Base, Ikeja                                         |
| 2164 | LA/0511 | Nigerian Airforce Medical Centre - Onikan | 12 King George V Road, Onikan, Lagos                                    |
| 2165 | LA/0512 | 403 CMD Medical Centre                    | NAF Station, Shasha, Lagos                                              |
| 2166 | LA/0524 | Lagoon Clinic                             | 11A, Idejo Street, V/Island, Lagos                                      |
| 2167 | LA/0526 | Lagoon Hospital, Ikeja                    | 97/101 Obafemi Awolowo Way, Ikeja.                                      |
| 2168 | LA/0528 | Finnih Medical Centre                     | 42, Oduduwa Crescent G.R.A, Ikeja.                                      |
| 2169 | LA/0529 | Kupa Medical Centre Ltd                   | 4, Lateef Salami Street, Off M/M In""tl Airport Rd. Ajao Estate, Lagos. |
| 2170 | LA/0533 | Delta Crown Hospital & Mat. Home          | 14, Ajayi Street, Ketu, Lagos.                                          |
| 2171 | LA/0535 | Osuntuyi Medical Centre, Obanikoro        | 6, Alh. Salisu Street, Obanikoro, Lagos.                                |
| 2172 | LA/0539 | Crystal Specialist Hospital               | 148, Akowonjo Road, Dopemu, Lagos.                                      |
| 2173 | LA/0541 | Faith City Hospital, Ajao -estate         | 16, Asa-Afariogun Street, Off Osolo Way, Ajao Estate, Lagos.            |
| 2174 | LA/0543 | Faith City Hospital, V/I                  | 2B, Oko-Awo Close, V/Island, Lagos                                      |
| 2175 | LA/0545 | R-Jolad Hospital                          | 1, Akinyede Street, By New Garage, Bariga, Lagos.                       |
| 2176 | LA/0549 | Heals Specialist Hospital                 | 40B, Godwin Omonua Street, Irekari Estate.                              |
| 2177 | LA/0552 | Healing Cross Hospital Ltd                | 34, Apena Street, Okota Isolo, Lagos                                    |
| 2178 | LA/0553 | Eko Hospital, Surulere                    | Surulere, Lagos                                                         |
| 2179 | LA/0554 | Krown Hospital & Maternity Centre         | 11, Alhaji Sekoni Street, Off Alimosho Rd, Iyana-Ipaja, Lagos.          |
| 2180 | LA/0557 | Legus Specialist Hospital                 | 34 Akorohunfayo Street, Ikorodu Rd., Igbobi, Lagos                      |
| 2181 | LA/0560 | Fabma Hospital                            | 13, Yaya Abatan Street, Ijaiye Ogba, Ifako, Ijaiye, Lagos               |
| 2182 | LA/0561 | Lagos Univ. Teach. Hosp.                  | Idiaraba, Lagos                                                         |
| 2183 | LA/0562 | Lagos Island Maternity Hosp.              | Broad Street, Lagos                                                     |
| 2184 | LA/0563 | Lagos State University Teach. Hospital    | Ikeja, Lagos State                                                      |
| 2185 | LA/0564 | Lagos State General Hospital              | Broad Street, Lagos.                                                    |



|      |         |                                                |                                                                                     |
|------|---------|------------------------------------------------|-------------------------------------------------------------------------------------|
| 2186 | LA/0566 | Elegbeleye Specialist Hospital                 | 1, Elegbeleye Street, Ikosi-Ketu, Lagos                                             |
| 2187 | LA/0569 | Alheri Hospital                                | 10, Ojodu Abiodun Road, Off Kosoko Road, Berger B/Stop, Ojodu, Lagos                |
| 2188 | LA/0578 | 149 Bn MRS Ojo                                 | Ojo, Lagos State                                                                    |
| 2189 | LA/0579 | 174 Bn MRS Ikorodu                             | Ikorodu, Lagos                                                                      |
| 2190 | LA/0580 | 65 Bn MRS Victoria Island                      | V/Island, Lagos                                                                     |
| 2191 | LA/0582 | 242 Recce Bn MRS, Badagry                      | Badagry, Lagos                                                                      |
| 2192 | LA/0583 | 56 Signal Command MRS, Mile 2                  | Mile 2, Lagos                                                                       |
| 2193 | LA/0584 | NASFA MRS, Apapa                               | Apapa, Lagos                                                                        |
| 2194 | LA/0585 | NASFA MIR Apapa                                | Apapa, Lagos State                                                                  |
| 2195 | LA/0586 | University of Lagos Health Centre              | Yaba, Lagos State                                                                   |
| 2196 | LA/0588 | Police Hospital, Falomo                        | Ikoyi, Lagos                                                                        |
| 2197 | LA/0589 | Cottage Hospital/Comprehensive Health Centre   | Police College, Ikeja, Lagos State                                                  |
| 2198 | LA/0590 | Cottage Hospital/Comprehensive Health Centre   | Police Lagos State Police Command                                                   |
| 2199 | LA/0591 | Nigerian Navy Reference Hospital               | Navy Town, Ojo, Lagos                                                               |
| 2200 | LA/0592 | Navy Medical Centre                            | Dockyard, Victoria Island, Lagos                                                    |
| 2201 | LA/0593 | Obisessan Navy Medical Centre                  | Mobil Road, Apapa, Lagos                                                            |
| 2202 | LA/0594 | Sick bay NNS BEECROFT                          | Lagos, Lagos State                                                                  |
| 2203 | LA/0597 | Sick bay Gowon Estate                          | Gowon Estate, Lagos.                                                                |
| 2204 | LA/0599 | Ladi-lak Medical Centre                        | No 53 IGY Ologbin street, Ladi-lak B/Stop, Bariga, Lagos                            |
| 2205 | LA/0600 | Ultimate Charry Spec. Medical Centre           | 15B Admiralty Way, Lekki Phase I, Victoria Island, Lagos                            |
| 2206 | LA/0601 | Samaria Hospital                               | No 17 Dabo Bashorun street off Ali Dada Street, Okota, Lagos                        |
| 2207 | LA/0602 | Watershed Hospital                             | No 3 Dele Orisabiyi street off Ago palace way, Okota, Lagos                         |
| 2208 | LA/0604 | St Annes Infirmary (Queens Clinic)             | 5A Dauda Lane, Off Moshood Abiola Way, Ebute Metta                                  |
| 2209 | LA/0606 | Vones Medical Centre                           | 9 Barikisu St Onike Yaba                                                            |
| 2210 | LA/0607 | Omol Medical Centre and Maternity Home Limited | No 57 Shyllon street, Palm Grove, Lagos                                             |
| 2211 | LA/0608 | Springtime Medical Centre                      | 22, Olusesi Str., Opp. Chemron 2nd Gate by the Conservation Centre, Lekki Pennisula |
| 2212 | LA/0611 | T & S Hospital                                 | 169 Agege Motor Road Olosha B/S Mushin                                              |
| 2213 | LA/0612 | Good Health Medical Centre                     | No 19 Oludegun street, Ire-Akari estate, Isolo                                      |
| 2214 | LA/0613 | Labi Hospital & Maternity                      | 13 Oziegbe Street, Ilupeju                                                          |
| 2215 | LA/0615 | Twins Convalescent Health Centre               | No 37/39 Karonwe street Abule Egba Ifako                                            |
| 2216 | LA/0616 | Continental Hospital and Maternity Home        | 11 Ago-Owu St Off Kayode St Onipanu                                                 |

|      |         |                                         |                                                                                       |
|------|---------|-----------------------------------------|---------------------------------------------------------------------------------------|
| 2217 | LA/0617 | Aniyun hospital                         | No 3 Femi Aderibigbe, close off Diya street Beside Total filling station, Ifako       |
| 2218 | LA/0618 | Safe-way Hospital & Maternity           | Km 46 Lagos-Epe Express Road, Sangotedo, Lagos                                        |
| 2219 | LA/0620 | Moyub Hospital                          | No 1 Hajia Halima Mohammed ,close off Taiwo street ,Okota                             |
| 2220 | LA/0621 | Divine Medical Centre                   | 16, Akanbi Danmole Street, off Ribadu Rd., SW., Ikoyi, Lagos                          |
| 2221 | LA/0622 | Barnes Hospital                         | Plot 34B Oniru Road, Dideolu Estate, Victoria Island                                  |
| 2222 | LA/0623 | Bola Hospital And Maternity Home        | 30 Akiti Avenue Off Okota Road                                                        |
| 2223 | LA/0626 | Ago Medical Centre                      | No 6 Oyinlola close, By Arewa B/stop Ago palace way, Okota                            |
| 2224 | LA/0627 | Best Hope Hospital Limited              | 40 Alaromi St Off Layi Oyekanmi St Mushin                                             |
| 2225 | LA/0629 | Apex-Care Hospital                      | 42 Kujore St Ojota                                                                    |
| 2226 | LA/0630 | Ameso Specialist Hospital               | 7 Jumat Olukoya Street Off Ogudu Rd Ojota                                             |
| 2227 | LA/0631 | Lifecare Hospital And Maternity         | 5 Segun Omolale street, off Balogun b/stop Ago palace way ,Okota                      |
| 2228 | LA/0632 | Tmac Specialist Hospital                | 14, Berkeley Street, off King George Street, Onikan, Lagos Island                     |
| 2229 | LA/0633 | New Alpha Medical centre                | 36, Abusatu Str., Off Lagos Abeokuta, Exp. Way, Araromi, Adeolu B/Staop, Agege, Lagos |
| 2230 | LA/0634 | Pinecrest Specialist Hospital           | 83 Makinde street, Mofoluku, Oshodi                                                   |
| 2231 | LA/0635 | Aruna Ogun Memorial Specialist Hospital | 2/4 Bamimosu St Ipakodo-Ikorodu                                                       |
| 2232 | LA/0636 | Geo-marie Hospital                      | 35, AdePegbu Street, Abule-Egba, Lagos                                                |
| 2233 | LA/0637 | Heda Hospital                           | 2A, Princess Aina close, Ajao Estate ,Oshodi                                          |
| 2234 | LA/0638 | Evangel Hospital                        | 106, Abeokuta Expressway, Awori B/Stop, Abute-Egba, Lagos                             |
| 2235 | LA/0639 | Donas Hospital and Maternity            | 67 Owulade Avenue Irawo Bus/Stop Owode                                                |
| 2236 | LA/0640 | Balda Hospital & Maternity              | No 31, Itsekiri Street, Iju-Ajuwon, Lagos                                             |
| 2237 | LA/0643 | Ayodele Medical Centre                  | 23/25, Jonathan Coker Rd, Off Fagba Junction, Iju Agege                               |
| 2238 | LA/0644 | First Line Hospital                     | 2nd Avenue House 14 By 207 Road Junction, Festac Town                                 |
| 2239 | LA/0645 | Petros foundation Hospital              | 20 Seinde Callisto Crescent Charity, Oshodi                                           |
| 2240 | LA/0646 | Ancilla Catholic Hospital               | 3, Muyiwa Olojo Street, Iju, Lagos                                                    |
| 2241 | LA/0647 | Jobi Clinic & Maternity Hospital        | 3/5 Adeyeri Owuyo St Ikorodu                                                          |

|      |         |                                      |                                                                        |
|------|---------|--------------------------------------|------------------------------------------------------------------------|
| 2242 | LA/0648 | Omni Medical Centre                  | 18, Boyle's Street, Onikan, Lagos Island, Lagos                        |
| 2243 | LA/0649 | Motolani Medical Centre              | 13, Alfa-Nla Street, Agege, Lagos                                      |
| 2244 | LA/0650 | Esiri Specialist Hospital            | 5 Alashe Close Ojogbe Ikorodu                                          |
| 2245 | LA/0651 | T&S Hospital, Apapa                  | 26 Bombay Crescent Apapa                                               |
| 2246 | LA/0652 | Christiana Clinic                    | 8 Ogunyemu street, Pedro, Bariga                                       |
| 2247 | LA/0653 | Estate Model Clinic                  | Blk 77, Flat 4, Ijaiye Low Cost Estate, Agege, Lagos                   |
| 2248 | LA/0654 | Unita Hospital                       | 63, Oduduwa, Street, by College B/Stop, Ikotun, Lagos                  |
| 2249 | LA/0655 | Subol Hospital                       | 16/17, Oba Amusa Avenue, Off Ikotun Rd, Idimu-Lagos                    |
| 2250 | LA/0656 | Shammah Hospital                     | 5, Epe Street Off Iludun Street Amukoko Lagos                          |
| 2251 | LA/0657 | Solik Hospital                       | 1a, Abeokuta Street, Off Okunola B/Stop, Egbeda, Lagos                 |
| 2252 | LA/0659 | Bethesda Family Clinic and Maternity | 207 Road, A Close House 6. Festac Town Lagos                           |
| 2253 | LA/0661 | Hanoba Medical Centre                | 23, Boyle's Street, Onikan, Lagos                                      |
| 2254 | LA/0662 | Ajayi Medical Center                 | 50 Ekulu Street Ikorodu                                                |
| 2255 | LA/0663 | Shefi Hospital                       | 7-9 Ogunlana Street Off Akowonjo RD Egbeda                             |
| 2256 | LA/0666 | Setfone Hospital Limited             | 23 Church Str Abule Taylor B/Stop Off Abeokuta Exp Way                 |
| 2257 | LA/0667 | Natafod Consultants Hospital         | 104 Cemetery Road, Mosafejo, NEPA B/Stop, Amukoko, Lagos               |
| 2258 | LA/0668 | High Rocks Hospital                  | 38 Afariogun street, Oshodi                                            |
| 2259 | LA/0670 | Adesola Clinic                       | 2 Onabola street Pedro Bariga                                          |
| 2260 | LA/0671 | Ropheka Hospital Ltd                 | 6 Dosu Ogundele Street Miccom Bus/Stop Akowonjo Lagos                  |
| 2261 | LA/0672 | Capes Hospital Ltd                   | 16a Alubarika street, Bariga                                           |
| 2262 | LA/0673 | Promise Medical Center Ltd           | 112 Dopemu Rd Ayinla B/Stop Dopemu Lagos                               |
| 2263 | LA/0674 | Primex Hospital                      | 58 Igando Rd Unity Bus/Stop Ikotun-Egbe Lagos                          |
| 2264 | LA/0675 | Bonne Sante Health Service Ltd.      | 3rd Avenue, Festac, 321 Road, C Close, House No. 8, Festac Town, Lagos |
| 2265 | LA/0677 | Okiki Clinic & Maternity             | 18 Ola Sheu Str Iyana Ipaja by Alimosho Bus/Stop                       |
| 2266 | LA/0679 | Mobonike-T Medical Centre            | 26, Surulere 1 Bus Stop Dopemu Lagos                                   |
| 2267 | LA/0680 | Majoroh Medical Center               | 6 Olofin Street Apapa Lagos                                            |
| 2268 | LA/0682 | Jericho Clinic                       | 30 Ayodele street, Mafoluku ,Lagos                                     |
| 2269 | LA/0683 | Light Hospital                       | 15 Olumide Onanubi Str Off Folarin Str Alimosho/Off Jimoh B/S Akowonjo |
| 2270 | LA/0684 | Somito Specialist Hospital           | Plot 937, 13th , Road First Avenue Festac Town Lagos                   |

|      |         |                                                         |                                                                                  |
|------|---------|---------------------------------------------------------|----------------------------------------------------------------------------------|
| 2271 | LA/0686 | Plato Hospital And Maternity Home                       | 641 Agege Motor Road, Shogunle, Lagos                                            |
| 2272 | LA/0687 | Hamkad Hospital                                         | 39 Olawale Cole Street U-turn B/Stop Abule Egba                                  |
| 2273 | LA/0688 | G. Estate Clinic                                        | 34 Rd A Close Plot 311 Gowon Estate Ipaja Lagos                                  |
| 2274 | LA/0689 | Beebat Medical Center                                   | 2 Jimoh Ojora Street Off Ojo Road Bus Stop , Ajegunle Apapa Lagos                |
| 2275 | LA/0690 | DaySpring Hospital & Maternity                          | 1 Popoola Street Off Isijola Street Ikotun Lagos                                 |
| 2276 | LA/0693 | Ericon Clinic and Maternity                             | 8 Ladipo Close, Olodi Apapa Lagos                                                |
| 2277 | LA/0694 | The Ark Hospital and Maternity                          | 8 Ogun Abewenla Str Off Ayobo Rd Oja B/Stop Ipaja                                |
| 2278 | LA/0697 | Adenike Fadeyibi Memorial Hospital                      | 20 Akowonjo Rd, Egbeda, Akowonjo Lagos                                           |
| 2279 | LA/0699 | Golden Cross Infirmary Hospital and Maternity Home Ltd. | 22 Road Festac Town Lagos                                                        |
| 2280 | LA/0700 | Goodwill Family Hospital                                | 84 Oluwa Street Ladega Bus Stop Olodi Apapa Lagos                                |
| 2281 | LA/0701 | Saseun Hospital And Maternity                           | 172 Kiri-Kiri Road Apapa                                                         |
| 2282 | LA/0702 | ST. James Clinic Hospital And Maternity                 | 69, Wilmer Crescent, Cocnut Bus stop, Olodi                                      |
| 2283 | LA/0703 | Gateway Clinic & Maternity                              | 211, Muyibi Str, Off Peoples B/Stop, Olodi Apapa, Lagos                          |
| 2284 | LA/0704 | Christ Foundation Clinic                                | 68 Alhaja Sinatu Ajayi Road, Morogbo Agbara, Lagos                               |
| 2285 | LA/0705 | Elphy Hospital                                          | 6, Task Force Rd, By PPL B/S, Okokomaiko, Lagos                                  |
| 2286 | LA/0706 | Onyems-B Hospital                                       | 16, Oba-Dauda Str., Ojoo Alaba, Lagos                                            |
| 2287 | LA/0708 | Bonne Sante Hospital                                    | 12, Ahl Sulaiman Str. Opp Ojoo Military Cantonment, Ojo, Lagos                   |
| 2288 | LA/0709 | Tin Can Hospital                                        | 3, Kudaisi Str. Off Tin Can Exp. Olodi, Apapa                                    |
| 2289 | LA/0710 | Makal Medical Centre                                    | 42, Alh Balogun Str, Kuje, Anuwo Off Old Ojo Rd, Lagos                           |
| 2290 | LA/0711 | Patol Medical Centre                                    | 48, Swamp Str. Off Kirikiri Rd, Olodi, Apapa                                     |
| 2291 | LA/0713 | De-New Aiyetoro Medical Centre                          | 3, Samson Str, Ibaso-Nla Aiyetoro, Near Ijanikin Ojo LGA Badagry Exp. Way, Lagos |
| 2292 | LA/0714 | The Great Physcian Hospital Ltd                         | 3, Niyi Adebule Str, New Nepa B/S Badagry                                        |
| 2293 | LA/0715 | Ola-Oki Medical Centre                                  | Opp Iberoko Low cost B/S Ibereko, Badagry                                        |
| 2294 | LA/0716 | General Hospital Apapa                                  | 16, Ibikunle Akintoye Str, Off Randle Rd, Apapa                                  |
| 2295 | LA/0718 | St. Louis Medical Centre                                | 3, Ado Avenue, Apapa, Lagos                                                      |
| 2296 | LA/0719 | C R I Medi Clinic                                       | 42A Issac John Street GRA Ikeja                                                  |

|      |         |                                         |                                                                    |
|------|---------|-----------------------------------------|--------------------------------------------------------------------|
| 2297 | LA/0720 | Unity Hospital ,Ikeja.                  | 138 Obafemi Awolowo Way Ikeja                                      |
| 2298 | LA/0721 | Adefemi Hospital                        | 49 Seriki Aro, Avenu Off Obafemi Awolowo Way Lagos                 |
| 2299 | LA/0722 | Devine Hospital                         | 8 Lawal Street by Oregun Bus Stop, Oregun, Ikeja                   |
| 2300 | LA/0723 | The Duke Medical                        | 26 Bamishele Street Off Allen Avenue Ikeja                         |
| 2301 | LA/0724 | Isalu Hospital                          | 10 Wempco Road, Off Lateef Jakande Road, Ogba, Ikeja               |
| 2302 | LA/0725 | Omolewa Medical Centre                  | 10B Idowu Akinola Off Olufemi Ojo, Oluwura Isheri, Lagos           |
| 2303 | LA/0726 | RCCG Life Centre Hospital & Maternity   | 9 Amore Street Off Toyin Street, Ikeja                             |
| 2304 | LA/0727 | Idowu Specialist Hospital               | 10A Olaniji Street, Off Kudirat Abiola Way, Julie Estate, Oregun   |
| 2305 | LA/0729 | White House Clinic                      | S. Ola Bangbosi Street Off Toyin                                   |
| 2306 | LA/0730 | The Valley Surgical and Medical Clinics | 5 Olatayo Alao Street River valley Estate Ojodu, Lagos             |
| 2307 | LA/0731 | Solid Rock Hospital                     | Plote 108 Isheri Road Ojodu                                        |
| 2308 | LA/0732 | Sharon Height Medical Centre            | 13 Amore Street Off Toyin Street Ikeja                             |
| 2309 | LA/0733 | Mother & Child Hospital                 | 39A, Adeniyi Jones Avenue Ikeja                                    |
| 2310 | LA/0734 | Life Care Clinic & Maternity            | 12, Alh. Tokumbo Ali Street Off Toyin Street Ikeja                 |
| 2311 | LA/0735 | Jibola Hospital & Maternity             | 22 Comfort Adeniyi Street Mende, Maryland, Lagos                   |
| 2312 | LA/0736 | German Friendship                       | 20, Amore Street Off Toyin Street                                  |
| 2313 | LA/0737 | G & S Medical & Dental Hospital         | 15 Muyibi Street, Oveira Ogba, Lagos                               |
| 2314 | LA/0738 | Dominion Medical Consultant             | 7 Ade Ojo Street Wemabod Estate, Ikeja, Lagos                      |
| 2315 | LA/0739 | Balmgilead Hospital                     | 49, Kayode Street Off Iyaiye Rd. Ogba                              |
| 2316 | LA/0740 | Amazing Grace Medical Centre            | PF 910, Omole Phase 1 Omotade Crescent Agidibi Rd. Ikeja           |
| 2317 | LA/0741 | Utibe Abasi Hospital - Surulere         | 1 Akinsulire Street Aguda                                          |
| 2318 | LA/0742 | Standard Medical Centre                 | 18, Agbonyin Street Off Adelebun Street Aguda                      |
| 2319 | LA/0743 | St. Charles Hospital                    | 59, Ayilara Street                                                 |
| 2320 | LA/0745 | Parkande Specialist Hospital            | 13, Rasaq Balogun Street Off Adetola Street Off Adeniran Ogunsanya |
| 2321 | LA/0748 | Jalupon EState Hospital                 | 63 Bode Thomas Street Lagos                                        |
| 2322 | LA/0750 | Fountain Hospital Ltd.                  | B Daramola Lane Off Adesina Street Ijesha-tedo                     |
| 2323 | LA/0752 | Primus Hospital                         | 272 Ijesha Rd. Ijesha-tedo                                         |
| 2324 | LA/0753 | Bimtom Hospital                         | 205 Ijesha Rd. Ijesha-tedo                                         |
| 2325 | LA/0754 | Life Link Clinic                        | 1B Amosu Street Off Bode Thomas Street By UBA                      |

|      |         |                                              |                                                                                |
|------|---------|----------------------------------------------|--------------------------------------------------------------------------------|
| 2326 | LA/0791 | The Health Arena                             | 13 Strachan Str Off Igbosere Rd Opp Lapal House Lagos                          |
| 2327 | LA/0827 | Shasha Medical Centre                        | 15, Oyebola Street, off Ajako B/Stop, Shasha, Alimosho, Lagos                  |
| 2328 | LA/0834 | Gold Cross Hospital                          | 18 Iwaya Road, Onikan, Lagos                                                   |
| 2329 | LA/0858 | Jeffis Specialist Hospital                   | 9 Adegbola Street, Alakuku, Lagos                                              |
| 2330 | LA/0861 | Lex Medical Centre                           | 5 Rahat Alabi Street, Iyana Meiran B/Stop, Ijaiye, Lagos                       |
| 2331 | LA/0919 | Gideon Salvation Hospital & Maternity Centre | 3 Oyediran Str. Oke-Ira Ogbu                                                   |
| 2332 | LA/0920 | Fannimed Hospital                            | Block 210, Lily Road, LSDPC Med. Estate, Phase IV, Oba-Oguniyi Rd, Ogba, Lagos |
| 2333 | LA/0921 | Centre for Management Development, Lagos     | Shangisha, Lagos                                                               |
| 2334 | LA/0922 | Utibe Abasi Hospital - Victoria Island       | 897B Balarabe Musa Crescent Victoria Island Lagos                              |
| 2335 | LA/0930 | Treasuregold Hospital                        | 116B, Ago Palace Way, Last Bus Stop, Okota, Isolo,                             |
| 2336 | LA/0932 | Fafolu Medical Centre                        | 22, Fafolu Street, Olorunshogo, Lagos                                          |
| 2337 | LA/0934 | Ascon Clinic                                 | Badagry, Lagos                                                                 |
| 2338 | LA/0954 | Good faith Clinic                            | No. 1 Akindelu Street, off Folawoyo Bankole Street, Ikate, Surulere, Lagos     |
| 2339 | LA/0955 | DSS Clinic                                   | Shangisa, Lagos State                                                          |
| 2340 | LA/0961 | 9 Bde MC Ikeja                               | Ikeja Lagos                                                                    |
| 2341 | LA/0964 | Solad Medical Centre                         | No 8 Maria Ipaja - Lagos                                                       |
| 2342 | LA/0965 | Obitoks Hospital                             | 2 Gideon Adeniran Street oke Odo Lagos                                         |
| 2343 | LA/0967 | Adeolu hospital                              | 4-6, Oluwole Street, Akoka                                                     |
| 2344 | LA/0971 | adeshina hospital                            | 29. daudu street, off church b/stop, oshodi                                    |
| 2345 | LA/0972 | AGAPE MEDICAL CENTER                         | 16, OGUNBIYI ILO STREET, OLUDE B/STOP, IPAJA                                   |
| 2346 | LA/0973 | AL-GUDUS HOSPITAL                            | Temitope House, 48A Market Street, Abiodun Bus Stop, Shomolu                   |
| 2347 | LA/0974 | ANNA MARIA HOSPITAL                          | 19A DA SILVA STR. OFF BISOLA DUROSINMI DRIVE, LEKKI PHASE 1                    |
| 2348 | LA/0975 | APEX CARE CLINIC                             | 50/52 BROAD STREET, BOOKSHOP HOUSE                                             |
| 2349 | LA/0976 | AYOMIDE MEDICAL CLINIC                       | 11, IGBEHIN ADUN STREET, OSHODI                                                |
| 2350 | LA/0977 | BALM CLINICS                                 | 2/3 GODMON ESTATE, OKOTA                                                       |
| 2351 | LA/0978 | BARBINTO CLINICS                             | 25, OJOMO AMAKA AVENUE, OWODE AJEGUNLE, OFF IKORODU ROAD.                      |
| 2352 | LA/0979 | BAYO OGUNRO MEMORIAL HOSPITAL                | 158 KIRIKIRI ROAD OLODI APAPA                                                  |

|      |         |                                        |                                                                      |
|------|---------|----------------------------------------|----------------------------------------------------------------------|
| 2353 | LA/0980 | BEE HIVE NURSING HOME                  | 64 ADEWOLAN STREET                                                   |
| 2354 | LA/0981 | BIO BATAM HOSPITAL                     | 53 TIJANI STREET IYANA IPAJA OFF LAGOS ABEOKUTA EX/WAY, AGEGE        |
| 2355 | LA/0982 | BRODIE MENDES MEMORIAL HOSPITAL        | 8, KUGBUYI STREET MUSHIN                                             |
| 2356 | LA/0983 | BVM HOSPITAL                           | 103, MUYIBI STREET BY WILMER B/STOP                                  |
| 2357 | LA/0984 | Charis Medical Center                  | 4, OWOLABI BALOGUN STREET OFF FOLAGORO, SHOMOLU                      |
| 2358 | LA/0985 | CITIZEN MEDICAL CENTER                 | 86 NORMAN WILLIAMS STREET S/W IKOYI                                  |
| 2359 | LA/0988 | CROWNRISE HOSPITAL                     | 34, BASHIR SHEKONE ROAD, OFF EGBE OKE AFA, JAKANDE ISOLO             |
| 2360 | LA/0989 | CRUSAINTS HOSPITAL                     | 54, ADESIYAN STREEET, ILUPEJU                                        |
| 2361 | LA/0990 | Leme De-Hope Clinic                    | 5A KAYODE-ADEBANJI STREET , OKE AFA EJIGBO                           |
| 2362 | LA/0991 | DUNIA HOSPITAL                         | 47 OLD OKO OBA RD. AGEGE                                             |
| 2363 | LA/0992 | F.C.E AKOKA                            | AKOKA YABA                                                           |
| 2364 | LA/0993 | FIRST CITY HOSPITAL, OBALENDE          | 11, NOJEEM MAYEGUN RD, OBALENDE                                      |
| 2365 | LA/0994 | FIRST CITY HOSPITAL, LEKKI             | OSAPA LONDON LEKKI PENINSULA                                         |
| 2366 | LA/0995 | FIRST FAITH MEDICAL CENTRE, SURULERE   | 5, KARIMU COKER ORILE IGANMU                                         |
| 2367 | LA/0996 | FOLU CLINIC & MAT.                     | 516, IKORODU ROAD, KETU                                              |
| 2368 | LA/0998 | GOODTIDINGS HOSPITAL                   | 37/39 FASORO STREET, SURULERE                                        |
| 2369 | LA/0999 | GRACE SHIELD HOSPITAL & MAT            | 1, TOBOWOLA STREET,OFF ODEMUYIWA ROAD                                |
| 2370 | LA/1001 | HOLINESS HOSPITAL                      | 3, MODUPEOLA STREET,OFF AKEJA ROADBEHIND MUSLIM COLL. ILE IWE B/STOP |
| 2371 | LA/1002 | HOLY FAMILY CATHOLIC MEDICAL CENTER    | 22 RD FESTAC TOWN                                                    |
| 2372 | LA/1003 | IKOTUN NURSING HOME AND CONV. CLINIC   | 24, ABOGUN LOKO STR IJEGUN ROAD, IKOYUN                              |
| 2373 | LA/1004 | IMPERIAL MEDICAL CENTER                | 65 BRICKFIELD ROAD, EBUTE METTA WEST                                 |
| 2374 | LA/1005 | JACOBSON NURSING HOME                  | 26, OLUFEMI SOKAN STR. PAKO-AGUDA                                    |
| 2375 | LA/1006 | JIBOLU CLINIC                          | 12, AYILARA STR.                                                     |
| 2376 | LA/1007 | JLT SPECIALIST CLINIC & SKIN CENTER    | 43A KAKAWA STREET, LAGOS                                             |
| 2377 | LA/1008 | KRANZ SPECIALIST CLINIC & MAT. HOME    | 9, UNITY ROAD OFF TOYIN STREET, IKEJA                                |
| 2378 | LA/1009 | LIBRA SPECIALIST HOSPITAL              | 1, ONISEMO STREET,OFF MARSHA SURULERE                                |
| 2379 | LA/1010 | LIFE CARE CLINIC AND MATERNITY, OSHODI | 44 AROWOJOB STR. MAFOLUKU                                            |
| 2380 | LA/1011 | life line children hospital            | 133 OGUNLANA DRIVE SURULERE                                          |
| 2381 | LA/1013 | living faith spec. hospital            | 37 modele str off ojuelegba                                          |
| 2382 | LA/1014 | longe medical center                   | 126, olusegun osoba road, agbado crossing                            |

|      |         |                                                   |                                                                           |
|------|---------|---------------------------------------------------|---------------------------------------------------------------------------|
| 2383 | LA/1015 | lota medical center                               | 1 mojisola abass street off salvation str powerline b/stop, isheri-olofin |
| 2384 | LA/1016 | magdalene hospital                                | 5, araoti street yaba                                                     |
| 2385 | LA/1018 | Managed Health Care Services                      | 16 Obokun Street off Coker Road, Ilupeju                                  |
| 2386 | LA/1019 | Manifel Medical Center                            | 192 ijegun road, ikotun                                                   |
| 2387 | LA/1021 | mount sinai hospital,ikeja                        | 21, ajao road,ikeja                                                       |
| 2388 | LA/1022 | mount sinai hospital,surulere                     | 30, falolu street, surulere                                               |
| 2389 | LA/1023 | National Orthopaedic Hospital                     | 120/124 ikorodu rd.                                                       |
| 2390 | LA/1024 | Fegbemi New Dimension Hospital and Maternity Home | 20b brown str. oshodi                                                     |
| 2391 | LA/1025 | new grace land hospital                           | 1 & 2 grace land close off adeyemi apena str.                             |
| 2392 | LA/1026 | olu-adeyemi hospital                              | off nusiratu str, isolo                                                   |
| 2393 | LA/1027 | onaolapo victory clinic                           | 4, amoshe str, meiran ojokoro                                             |
| 2394 | LA/1028 | optimal medical center,ogba                       | 10, alimi ogunyemi str. off college road by cinema b/stop, ogba           |
| 2395 | LA/1029 | Optimal Specialist Hospital                       | 9 Gbaja Street Surulere                                                   |
| 2396 | LA/1030 | PACIFIC HOSPITAL                                  | 314 IJU WATER WORKS , IFAKO                                               |
| 2397 | LA/1031 | OSBON CLINIC AND MAT.                             | 9, ADENIYI ADEYELE STR, ILE EPO B/STOP, EJIGBO                            |
| 2398 | LA/1033 | PRAISE MEDICAL CENTER                             | 12, MARINE ROAD,APAPA                                                     |
| 2399 | LA/1034 | QUINTA HOSPITAL                                   | 182, KIRIKIRI ROAD, OLODI APAPA                                           |
| 2400 | LA/1035 | REGINA MUNDI CATHOLIC HOSPITAL MUSHIN             | 142-144 AGEGE MOTOR ROAD, MUSHIN                                          |
| 2401 | LA/1036 | REM YEMS HEALTH CENTER                            | 3 KOLLINTON CLOSE ALAGBADO                                                |
| 2402 | LA/1037 | RIB WAY POLY CLINIC                               | 24, LUTHER STR. OFF BAMGBOSE                                              |
| 2403 | LA/1038 | SANOMENS MEDICAL CENTER                           | 8, ISOLO/EJIGBO ROAD, OKE AFA ISOLO                                       |
| 2404 | LA/1039 | ROYAL SALVATION HOSPITAL                          | 9, MARQUIS STREET, MASALLACHI B/STOP, SHASHA , AKOWONJO                   |
| 2405 | LA/1040 | SHALOM HOSPITAL                                   | OYERO STREET,ADURA B/STOP,LAGOS-ABEOKUTA EX/WAY, ALAGBADO                 |
| 2406 | LA/1041 | SHALOM OLUWOLE CLINIC                             | 157, IJEBU ROAD,IKOTUN                                                    |
| 2407 | LA/1042 | SILVAN CLINIC                                     | 42/44 OKOTA ROAD, ISOLO                                                   |
| 2408 | LA/1043 | SOLIC CLINIC                                      | 1A ABEOKUTA STR. OFF IPONLE B/STOP, EGBEDA                                |
| 2409 | LA/1044 | SONAEN MEDICAL CENTER                             | 10 GKS(AGBABIKA) AGO                                                      |
| 2410 | LA/1045 | ST. CHARLES CLINIC                                | 36/60 OSHS DRIVE OFF KIRIKIRI ROAD, OLODI APAPA                           |
| 2411 | LA/1046 | ST. CLEMENT HOSPITAL                              | 321 RD. G-CLOSE 3RD AVENUE FESTAC TOWN                                    |
| 2412 | LA/1047 | ST. LOUIS MEDICAL CENTER                          | 7A/9A ABIBU OKI MARINA                                                    |
| 2413 | LA/1048 | ST. MICHAELS CLINIC                               | KM 974, LAGOS-ABEOKUTA EX/WAY, ALAKUKO B/STOP, ALAGBADO                   |



|      |         |                                                       |                                                              |
|------|---------|-------------------------------------------------------|--------------------------------------------------------------|
| 2414 | LA/1050 | ST.KIZITO (PHC)                                       | ILASAN HOUSING ESTATE JAKANDE, LEKKI                         |
| 2415 | LA/1051 | ST.MILLA HOPSITAL                                     | 19B LADIPO OLUWOLE STR. APAPA G.R.A                          |
| 2416 | LA/1052 | STEPHENS HOSPITAL & MAT HOME                          | 138, OLD OJO RD. AGBOJU AMUWO PAKO B/STOP                    |
| 2417 | LA/1053 | STEPHENS HOSPITAL                                     | 4 OYEWUMI CLOSE OFF FALOLU STR. SURULERE                     |
| 2418 | LA/1054 | General Hospital, Surulere                            | Randle Avenue                                                |
| 2419 | LA/1055 | TAI OWORU MEMORIAL HOSPITAL                           | 12 EMMANUEL STREET, PALM GROOVE                              |
| 2420 | LA/1056 | TOYEK HOSPITAL                                        | 479, IKORODU RD. KETU B/STOP                                 |
| 2421 | LA/1057 | IHE DOCTORS CLINIC                                    | 7A EGUNJOBI STREET BY SALAMI B/STOP, SHASHA                  |
| 2422 | LA/1058 | TROPICAL MEDICAL CLINIC                               | BLK 9, PLOT 99, LSPDC LAYOUT                                 |
| 2423 | LA/1059 | UPLIFT MEDICALCENTER                                  | 15, ADMIRALTY WAY, LEKKI PHASE 1                             |
| 2424 | LA/1060 | VICTORY CONVALESCENT CENTER                           | 22 ADETORO STREET, IKOTUN                                    |
| 2425 | LA/1061 | Vineyard Hospital Limited                             | 4 Gbemi Ogundeyi Street, Idimu, Lagos                        |
| 2426 | LA/1062 | UNITY HOSPITAL, Surulere                              | 81, OJUELEGBA ROAD, SURULERE                                 |
| 2427 | LA/1093 | Noble Medicals (African X-ray House)                  | 140, Okota Road,College b/stop,okota                         |
| 2428 | LA/1186 | Maritol medical center                                | 67 sam shonibare street, off ogunlana drive                  |
| 2429 | LA/1189 | Redeemed Medical Centre                               | Elias Close, Okokomaiko, Lagos                               |
| 2430 | LA/1196 | Tower Hospital                                        | 30, Olorun Alaba St.,Akuwonjo Alimosho Lagos                 |
| 2431 | LA/1197 | AFRIMED SPECIALIST HOSPITAL                           | 1 Williams Street, off Diya Street, Sawmill, Gbagada Lagos.  |
| 2432 | LA/1199 | Folabi Medical Center                                 | 78 Oworonsoki Road, Labule Bus Stop, Lagos                   |
| 2433 | LA/1201 | Jim-Sam Hospital & Maternity                          | 22 Gaskiya College Road, Ijora Badia, Apapa, Lagos           |
| 2434 | LA/1204 | Bestcare Hospital                                     | 2A Keffi Street, South-West Ikoyi                            |
| 2435 | LA/1205 | Skylight Clinic                                       | 27 Ibari/Old Otta Road, Moshalashi B/Stop, Alagbado          |
| 2436 | LA/1207 | Calvery Grace Hospital                                | Lagos Badagry Express Way, Iyana Iba B/Stop, Opp. LASU, Ojo  |
| 2437 | LA/1208 | Ajifat Medical Centre                                 | 17 Shoga Street, Mosafejo, Amukoko                           |
| 2438 | LA/1209 | City Medicare Clinic                                  | 36 Jimoh Ojora Street, Ajegunle                              |
| 2439 | LA/1210 | Faith Nursing Services                                | 32 Duro Adewale Street, Off Wazobia B/Stop, Abaranje, Ikotun |
| 2440 | LA/1211 | Merit Medical Centre                                  | 25 Wowo Street Olodi Apapa                                   |
| 2441 | LA/1213 | Jacob's Memorial Hospital, Specialist Clinic & Matern | 82 Old Ewu Road Oshodi                                       |
| 2442 | LA/1215 | Eprah Medical Clinic                                  | 228 Ikotun Road, Alhaja B/Stop, Idimu                        |

|      |         |                                               |                                                                      |
|------|---------|-----------------------------------------------|----------------------------------------------------------------------|
| 2443 | LA/1216 | Jibol Medical Clinic                          | 119 Tolu Road, Olodi-Apapa                                           |
| 2444 | LA/1218 | Lade Hospital                                 | 17 Olatunji Ige Street Ketu                                          |
| 2445 | LA/1219 | Landay Clinic                                 | 29 Kofo Abayomi Street, Apapa                                        |
| 2446 | LA/1224 | Jim Sim Hospital & Maternity                  | 22 College Road, Ijora Badia, Ajao Estate                            |
| 2447 | LA/1245 | Inland Specialist Hospital                    | 11 Bola Owodunni Street, Behind Eskay Filling Station, Alapere, Ketu |
| 2448 | LA/1257 | Holy Rosary Medical Centre                    | 321 Road A Close House 18, Festac Town                               |
| 2449 | LA/1259 | Duro Soleye Hospital                          | 34 Allen Avenue, Ikeja                                               |
| 2450 | LA/1260 | Yombo Hospital and Maternity Home             | 23 Oluyombo Street, Ikosi, Ketu                                      |
| 2451 | LA/1261 | Fellowship Hospital Ltd                       | 9 Oliyide Street, Off Unity Road Ikeja                               |
| 2452 | LA/1262 | Nigerian Army Signals MRS                     | 2 Marine Road, Apapa                                                 |
| 2453 | LA/1263 | NNS Qurra Sick Bay                            | Apapa Lagos                                                          |
| 2454 | LA/1264 | Armed Forces Resettlement Centre MRS          | Lagos                                                                |
| 2455 | LA/1265 | Nigerian Army School of Medical Sciences, Ojo | Ojo, Lagos                                                           |
| 2456 | LA/1268 | NASS Medical Centre                           | Apapa Lagos                                                          |
| 2457 | LA/1269 | 15 FER                                        | Topo Badagry                                                         |
| 2458 | LA/1270 | Santa Maria Hospital                          | 10, Santa Maria Street, Egan Igando                                  |
| 2459 | LA/1275 | Jaiyeola clinic                               | 4 Bankole Street by Famous Bust Stop, Pedro, Shomolu, Bariga         |
| 2460 | LA/1276 | Tonajib Hospital                              | 46 Maria Ibronke Street, Ikotun, Lagos                               |
| 2461 | LA/1278 | Tinu Hospital                                 | 86 Mushin Road, Isolo                                                |
| 2462 | LA/1283 | A. B. 10 Hospital                             | 2 Adeleke Odunuga Close, Harmony Estate, Ifako-Ijaye                 |
| 2463 | LA/1285 | Morak Medical Nigeria Ltd                     | 22 Adelakun Street, Off Hostel Bus Stop, Egbe                        |
| 2464 | LA/1286 | Yaba College of Technology Medical Centre     | Herbert Macaulay Way, Yaba                                           |
| 2465 | LA/1288 | Omosola Hospital                              | 5 Ige Street Iyana Ipaja Roundabout                                  |
| 2466 | LA/1289 | St Anthony's of Padua's Medical centre        | 40 Cardoso Street, Awodiora-Ajeganle                                 |
| 2467 | LA/1290 | Angel Hospital                                | 20 Ecwa Church Road, Coker Village, Orile Iganmu                     |
| 2468 | LA/1291 | Ethiope Clinic Limited                        | 6 Alhaji Kadiri Salami Street, Olodi Apapa                           |
| 2469 | LA/1292 | Ancel Hospital                                | 44 Kemberi Road, Okoko-Ojo, Lagos                                    |
| 2470 | LA/1293 | Ore-Ofe Hospital                              | KM 28 Badagry Express Way, Ojo                                       |
| 2471 | LA/1294 | Joedan Hospital                               | 3 Lagos Badagry Express Way Orile Iganmu, Lagos                      |
| 2472 | LA/1295 | Ademola Hospital                              | 1 Omowale Street, Cele Bus Stop, Ijanikin-Ojo                        |

|      |         |                                     |                                                              |
|------|---------|-------------------------------------|--------------------------------------------------------------|
| 2473 | LA/1296 | Ola Iya Specialist Hospital Ltd     | 29 akinhanmi street, Off Fashoro Street, Surulere            |
| 2474 | LA/1297 | Funto Hospital                      | 131 Ijesho Road, Itire, Surulere                             |
| 2475 | LA/1298 | Ore-Ofe Clinic                      | 2 Aguntashola Street Ijeshatedo                              |
| 2476 | LA/1299 | Immanuel (M) Hospital               | 19 Adebayo Mokuolu Street, Anthony Village, Lagos            |
| 2477 | LA/1301 | Divine Blessing Hospital            | 1 Aruna Ayuba Close, Akesan, Lagos                           |
| 2478 | LA/1302 | San Pedro Specialist Medical Centre | 4 Eddy Onugha Drive, Okota                                   |
| 2479 | LA/1303 | Tolulope Medical Centre             | 53, Temitope Street. Ilasamaja, Lagos                        |
| 2480 | LA/1304 | St Mary's Specialist Hospital       | Plot 458 Titilayo Adedoyin Street, Omole Phase 1, Ikeja      |
| 2481 | LA/1305 | Eternal Life Hospital               | 1 Ashimowu Abeo Street, Sari Iganmu, Lagos                   |
| 2482 | LA/1306 | Rock Medical Centre                 | 9 Iju Road, Agege                                            |
| 2483 | LA/1307 | Kunlade Hospital                    | 7 Opeki Road, Olude Ipaja, Lagos                             |
| 2484 | LA/1308 | The Green Pastures Hospital         | 7 Afolabi Obe Street, Ori Oke, Ejigbo                        |
| 2485 | LA/1310 | Fajip Hospital                      | 43 Agbonyin Avenue, Surulere                                 |
| 2486 | LA/1311 | Blue Cross Hospital                 | 48 Ijaiye Road, Ogba                                         |
| 2487 | LA/1313 | P & G Medical Centre                | 29 Sanni Labode Street, New Oko-Oba, Lagos                   |
| 2488 | LA/1315 | Tolu Medical Centre                 | 25 Amodu Tijani Street, Tolu Bus Stop, Olodi Apapa           |
| 2489 | LA/1319 | Grand Medical Centre                | 20 Kayode Street, Onipanu, Lagos                             |
| 2490 | LA/1320 | Urban Medical Centre                | 16 Baiyewu Close, Off Ajayi Road, Ogba                       |
| 2491 | LA/1321 | City of Hope Medical Centre         | 80 Bale Ayetoro street Ajegunle                              |
| 2492 | LA/1322 | Adeb Hospital                       | 5 Ogunshipe Crescent, Coker, Orile Iganmu, Lagos             |
| 2493 | LA/1323 | Rikky Hospital                      | 193/197 Ojo Road Ajegunle                                    |
| 2494 | LA/1324 | Syban Medical Clinic                | 1 Ogunderu Street, Sari Iganmu, Lagos                        |
| 2495 | LA/1325 | Ajangbadi Central Hospital          | 1 Adeola Street Salami Bus Stop, Ajangbadi, Lagos            |
| 2496 | LA/1326 | Ilogbo Central Hospital             | 175 Ilogbo Road Ajangbadi                                    |
| 2497 | LA/1327 | Biomass Nigeria Limited             | 3 Old Isheri Ijaye Road Aguda                                |
| 2498 | LA/1329 | Ajara Medical Centre                | 1 Ajara Medical Centre Street, Topo, Badagry                 |
| 2499 | LA/1331 | Bee-Hive Nursing Home               | 64 Adetola Street, Surulere                                  |
| 2500 | LA/1332 | Celian Hospital                     | 231 Kirikiri Road, Olodi Apapa                               |
| 2501 | LA/1333 | Dialyzer Medical Centre             | 60, Arowojobe Street, Oseni Bus Stop, Oshodi                 |
| 2502 | LA/1334 | Molayo Medical Centre               | 20 Akinyele Street, Oko Oba                                  |
| 2503 | LA/1335 | Nigeria French Language Clinic      | Nigeria French Village, Badagry                              |
| 2504 | LA/1337 | T J Dennis Specialist Hospital      | 3/5 Olaitan Street off Nnobi Street, Kilo Junction, Surulere |
| 2505 | LA/1338 | Tonez Hospital                      | 32 James Robertson Street, Surulere                          |

|      |         |                                       |                                                                              |
|------|---------|---------------------------------------|------------------------------------------------------------------------------|
| 2506 | LA/1339 | Bankole Medical Centre                | 3 Ajigbotinu Street, Agege                                                   |
| 2507 | LA/1341 | Jocon Davids Hospitals                | 6B, Adebajo Street, Asa Estate, Soluji, Gbagada                              |
| 2508 | LA/1344 | Tare's Clinic                         | 11 Shiro Street, Fadeyi                                                      |
| 2509 | LA/1345 | Lydia Nursing Home and Maternity      | 42 Ogunsola Street, Aguda, Ogba                                              |
| 2510 | LA/1347 | Good Seed Specialist Hospital         | 1/3 Asa Afariogun Road, Ajao Estate                                          |
| 2511 | LA/1349 | Polus Medical Clinic                  | 192 Iju Road, Londo B/Stop, Iju                                              |
| 2512 | LA/1350 | Mary-Anne Medical Centre              | 62 Akanro Street, Ilasamaja, Mushin                                          |
| 2513 | LA/1354 | St Patricks Medical Center            | 19 Adams Street, Oworonshoki                                                 |
| 2514 | LA/1355 | St Anthony's Hospital                 | 7 Fadiya Street, Ketu, Lagos                                                 |
| 2515 | LA/1356 | Eromon Specialist Hospital            | 47 Ganiyat Street, Monkey Village, Mazamaza, near Navy gate                  |
| 2516 | LA/1357 | Bey Clinic                            | 2 Alhaji Shittu Street, Aguda, Surulere                                      |
| 2517 | LA/1359 | Royal Specialist Hospital             | 11 Olubunmi Alonge Street, Pako, Aguda                                       |
| 2518 | LA/1360 | New World Clinic                      | 5 Bankole Street, Ilasamaja, Isolo                                           |
| 2519 | LA/1361 | Aishat Specialist Hospital Ltd        | 26 Fagbenro Street, Idi-Araba                                                |
| 2520 | LA/1362 | De-Best Maternity & Convalescent Home | 29 Ijaoye Street, Jibowu, Yaba                                               |
| 2521 | LA/1363 | Sentinel Hospital                     | 1 Benson Akinyele Street, Okota                                              |
| 2522 | LA/1365 | Rally Hospital                        | 13 Fadiya Street Off Demurin, Ketu                                           |
| 2523 | LA/1366 | Prime Healthgate Medical              | 9, Capital Road, Agege                                                       |
| 2524 | LA/1367 | Framag Specialist Hospital            | 7 Regina Omolara Street, off Opebi Road                                      |
| 2525 | LA/1368 | House of Care Hospital                | 1 Ajayi Street off Ogundana Street, Allen Avenue, Ikeja                      |
| 2526 | LA/1369 | Olive Medicare Hospital & Maternity   | 6 Gholus Close, Dopemu Roundabout                                            |
| 2527 | LA/1370 | Royan Hospital                        | 7 Aina Street Ojodu                                                          |
| 2528 | LA/1371 | Mublyn Clinic & Maternity             | 424 Ikorodu Road, Ojota                                                      |
| 2529 | LA/1372 | Acme Medical Centre                   | 10 Akinwunmi Street Alagomeji                                                |
| 2530 | LA/1373 | Bernice Clinic & Maternity            | No. 5 Fadare Street, Off Adedoyin Street Kosofe, Mile 12, Ketu, Lagos        |
| 2531 | LA/1374 | Rayine Hospital                       | 15 Ashibejoye Street, Apapa                                                  |
| 2532 | LA/1375 | New Capstone Specialist Hospital      | 2 Ilamoye Street off Adeshina Street, Ijeshatedo                             |
| 2533 | LA/1376 | Glorious Mercy Clinic                 | 14 Akintunde Williams                                                        |
| 2534 | LA/1377 | G & T Nursing & Maternity Home        | Block 50, Plot 13, 2 Idowu Babafemi Street, Off AIT Station, Alagbado, Lagos |
| 2535 | LA/1378 | Holyfield Nursing Home                | 23 Ose-Olorun, off AIT Road, Alagbado                                        |
| 2536 | LA/1379 | New Merit Hospital Ltd                | 103 Ibari Road, Alagbado                                                     |
| 2537 | LA/1380 | Jones Specialist Hospital             | 54 Isolo Road, Egbe                                                          |

|      |         |                                             |                                                                           |
|------|---------|---------------------------------------------|---------------------------------------------------------------------------|
| 2538 | LA/1381 | Our Lady Hospital                           | Double Star Iyana Iheri Bus Stop, Jakande Isolo                           |
| 2539 | LA/1382 | Di-Imose Convalescent Home                  | 49 Oshodi Road, Oshodi                                                    |
| 2540 | LA/1384 | New City Clinic & Maternity                 | 19, Agbelekale Street, Oshodi, Lagos.                                     |
| 2541 | LA/1385 | Peniel Specialist Clinic                    | 11 Ikorodu Road, Jibowu                                                   |
| 2542 | LA/1386 | El-Bethel Hospital                          | 323, Old Ojo Road, Oluti Bus Stop                                         |
| 2543 | LA/1387 | First City Diagnosis                        | Plot 3, Jerry Iriabe Street, Lekki Phase 1                                |
| 2544 | LA/1388 | Basis Hospital                              | 2 Ogunromi Street Idimu                                                   |
| 2545 | LA/1389 | Rhowil Totalcare Medical Centre             | Plot 3b, Block 7, Site G, Satellite Town                                  |
| 2546 | LA/1390 | Safehands Medical Centre                    | 53 Old Ojo Road, Opposite Festac 1st Gate, Amuwo                          |
| 2547 | LA/1391 | DFO Medical Clinic                          | 1 Banji Adewole Lane, Pako, Akoka                                         |
| 2548 | LA/1392 | De-Bajo Hospital                            | 15 Bajulaye Road Somolu                                                   |
| 2549 | LA/1393 | Nimbus Medical Centre                       | 6 Kola Iyaomolere Street, By Omotayo Banwo Street, Ogudu, Ori-Oke Ojota   |
| 2550 | LA/1394 | God's Covenant Clinic                       | 14 Oworo Road, Pako B/Stop, Oworonsoki                                    |
| 2551 | LA/1395 | St Danie's Health Centre                    | 14 Oduduwa Street Car Wash B/Stop, Oworosoki                              |
| 2552 | LA/1396 | Sikeoye Hope Clinic                         | 64 Karimu Street, Ojuelegba                                               |
| 2553 | LA/1397 | Adebayo Ogunsanya Memorial Hospital Limited | 8 Eniasoro Beyioku Street, Off Ajao Road, Surulere                        |
| 2554 | LA/1398 | His Mercy Hospital                          | 17 Adeyemi Street Off Chemist B/Stop, Orile Iganmu                        |
| 2555 | LA/1399 | First Graceland Hospital                    | KM 42, Lekki-Epe Express Way, Abijoh Aja                                  |
| 2556 | LA/1400 | Rolawe Medical Centre                       | 3 Bajomo Close, Rolawe House, Shella Estate, Iju Ishaga                   |
| 2557 | LA/1401 | Molabi Hospital & Maternity Home            | 21, Rotimi Omotosho Street, Isheri Osun                                   |
| 2558 | LA/1402 | Maciland Medical Centre                     | 51 Lafunke Street, Papa B/Stop, Ijegan Ikotun                             |
| 2559 | LA/1403 | Emis Hospital                               | 33 Banjo Street off Laisu Road, Egbe                                      |
| 2560 | LA/1404 | Mount Carmel Hospital                       | 6 Mount Carmel Avenue, Owutu, Ikorodu                                     |
| 2561 | LA/1405 | Mayfair Medical Centre                      | 30/32 Adenle Street, Oke Koto, Agege                                      |
| 2562 | LA/1406 | First Cross Nursing & Maternity             | 14 Dairo Street Off Oluwalogbon, Ketu                                     |
| 2563 | LA/1407 | Rekky Hospital                              | 24 Abolere Street, Pero B/Stop, Ogba Road, Agege                          |
| 2564 | LA/1408 | Bedkal Divine Hospital                      | 9-11 Adeshina Avenue, Marcy Hill Estate, Akins B/Stop off Addo Road, Ajah |

|      |         |                                              |                                                                            |
|------|---------|----------------------------------------------|----------------------------------------------------------------------------|
| 2565 | LA/1409 | John Stephens Medical Clinic & Maternity     | 2 Jimoh Balogun Street, Off CMD Road, Ikosi, Ketu                          |
| 2566 | LA/1410 | Inland Specialist Hospital                   | 153, Ogudu Road GRA, Ojota                                                 |
| 2567 | LA/1411 | Adetunji Memorial Hospital                   | 4 Olayemi Street, Mazamaza                                                 |
| 2568 | LA/1412 | Holifield Specialist Hospital                | Plot 260, 12 Road, Festac Town                                             |
| 2569 | LA/1413 | Fineday Hospital                             | 57 Demurin Street, Ketu                                                    |
| 2570 | LA/1414 | Grace Springs Hospital                       | Oba Adetona, Ilupeju                                                       |
| 2571 | LA/1415 | El-Shaddai Hospital & Laboratory Ltd         | KM 4 LASU Road, Iyana School B/Stop, Iba, Ojo                              |
| 2572 | LA/1416 | Cosy Clinic                                  | Block 5, Flat 3, Godmon Estate, Okota                                      |
| 2573 | LA/1429 | Grace Fountain Medical Centre                | 11 Ileogbo Street, off Agbe Ward, Abule Egba                               |
| 2574 | LA/1430 | The Point Specialist Hospital                | 10 Akerele Road, Surulere, Lagos                                           |
| 2575 | LA/1431 | Jomark Hospital & Maternity Home             | 27 Alaba Road, Alaba-Oro                                                   |
| 2576 | LA/1432 | Kenny Medical Centre                         | 190 Kirikiri Road, Osondu B/Stop, Olodi Apapa                              |
| 2577 | LA/1433 | B-Rock Convalescent and Maternity            | 3/7 Olaiya Street off Igando Road, Mosalasi Bus Stop, Ikotun               |
| 2578 | LA/1434 | Aviation Medical Clinics Headquarters (FAAN) | Murtala Mohammed Way, Domestic Airport, Ikeja                              |
| 2579 | LA/1436 | Bob Specialist Hospitals                     | 22 Olugbede Street, off Aeor Road, Egbeda Estate                           |
| 2580 | LA/1438 | Aqua Libra Clinic and Maternity              | 1 Ogunsola Street, Iju-Ishaga                                              |
| 2581 | LA/1439 | Samacs Clinics                               | 24, Shekoni Street, Coker Village , Iganmu                                 |
| 2582 | LA/1440 | Britannia Hospital                           | Block 91, Plot 13 Aliu Animashaun Avenue, Lekki                            |
| 2583 | LA/1442 | Bolakunmi-Idowu Memorial Medical Center      | 5 Segun Ishola Street, Owuwu, Ikorodu                                      |
| 2584 | LA/1443 | Nobility Hospital                            | 30 Godwin Omonwa Street, Ire-Akari Estate, Isolo                           |
| 2585 | LA/1444 | DLW Medical Centre                           | 35, Shiaba Street off Ogba Road, Ikeja                                     |
| 2586 | LA/1446 | Golden Victory Way Hospital Ltd              | 49b, Shasha, Lagos State                                                   |
| 2587 | LA/1447 | St. Monica's Hospital & Maternity Centre     | 3, Tolanikawo Akanbi Crescent, Ayobo, Lagos, Lagos state                   |
| 2588 | LA/1448 | Ohbee Hospital                               | 1, Kudaki Road, Hostel Bus stop, Egbe, Lagos, Lagos state                  |
| 2589 | LA/1449 | Rivet Specialist Hospital                    | 2/3 Cobham Street, Off Olutosin Ajayi Street, Ajao Estate, Lagos State     |
| 2590 | LA/1450 | Hamaab Medical Centre                        | 18, Odutayo street, off Nnobi Street, Masha - kilo, Surulere, Lagos State  |
| 2591 | LA/1451 | Ambassador Medical Clinics                   | 38/44 Mashalashi street off St. Gregory Road, Obalende, Ikoyi, Lagos State |

|      |         |                                                |                                                                                                                 |
|------|---------|------------------------------------------------|-----------------------------------------------------------------------------------------------------------------|
| 2592 | LA/1452 | El- Femik Hospital                             | 13B, Alhaji Salami street off Brown road, Aguda, Surulere, Lagos State                                          |
| 2593 | LA/1453 | Strategic Insight Healthcare, The Hospital Ltd | 21, Raji Oladimeji Crescent, Off CMD Road, Opp Lagos State Gov. Secretariat Alausa, Magodo Phase 2, Lagos State |
| 2594 | LA/1455 | Chinaza Specialist Hospital                    | 2, Hakeem Onitiri Street, Off Ali Dada Str, Off Ago Palace Way, Okota, Lagos State                              |
| 2595 | LA/1456 | Rosescan Hospital                              |                                                                                                                 |
| 2596 | LA/1457 | Chironna Medical Centre                        | 21, Adebola Street, (Off Adeniran Ogunsanya Str) Surulere, Lagos State                                          |
| 2597 | LA/1458 | King Solomon Hospital                          | 4b Bola Crescent, Anthony Village, Somolu ,Lagos State                                                          |
| 2598 | LA/1462 | Able God Hospital and Maternity Home           | 52, Ijesha Road, Opp Mobil Petrol Station, Adedeji, B/stop, ijeshatedo Lagos State                              |
| 2599 | LA/1463 | Crest Hospital                                 | 156/160 Isuti Road, Oremeji B/Stop, Egan, Lagos State                                                           |
| 2600 | LA/1464 | Rally Hospital                                 | 9, Ibadan Street, Off Illupeju Road, Illupeju, Lagos State                                                      |
| 2601 | LA/1467 | Pharcept Hospital                              | Plot 74a, Block K, Olajomehin Road, Home of Grace B/Stop, Agbede Meeting, Ikorodu, Lagos State                  |
| 2602 | LA/1468 | Progressive Cottage Hospital                   | 334 Adeyemo Akapo Str, Omole Estate, Phase 1, LCD, Ojodu Lagos State                                            |
| 2603 | LA/1469 | Vintage Hospital                               | 53, Isuti road, Egan Lagos State                                                                                |
| 2604 | LA/1471 | Life Anchor Hospital                           | Anchor Alpha House, 17A Bamisile Street off Bameke Shasha, Lagos State                                          |
| 2605 | LA/1472 | St. Catherine of Siena Medical Centre          | 45/49 Old Ewu Road, Mafoluku, Oshodi, Lagos State                                                               |
| 2606 | LA/1473 | Uque Zion Hospital                             | 26, Ile Eja road okerube, Ikotun, Lagos State                                                                   |
| 2607 | LA/1475 | Standard Lifecare Clinic                       | 5, Paul Street, Off Sanni Balogun, Off Egba Road, New Oko Oba, Abule Egba Lagos State                           |
| 2608 | LA/1477 | We Care Hospital                               | 38, Oguntona Crescent, Ggbagada, Lagos State                                                                    |
| 2609 | LA/1478 | Layole & Sons Hospital Ltd                     | 89, Oyemekun Road, Off College road, Ifako/Ijaiye, Lagos State                                                  |
| 2610 | LA/1481 | Almaz clinics LTD                              | 13, Kewulere sreet, near St Hildas Catholic Church Obadore, Alimosho, Lagos State                               |
| 2611 | LA/1482 | J. A. Lashman Hospital Ltd                     | 9, Adedosu Street, Off Akilo road, Ogba, Lagos State                                                            |

|      |         |                                                   |                                                                                       |
|------|---------|---------------------------------------------------|---------------------------------------------------------------------------------------|
| 2612 | LA/1483 | Caring Trust Medical Clinic                       | 59, Jubrila Street, Johnson Bus Stop, Ijeshatedo, Lagos State                         |
| 2613 | LA/1486 | Samom Clinic                                      | 5, Anu Oluwapo Street, Off Adetola Bus stop, Ijaiye, Ojokoro, Lagos State             |
| 2614 | LA/1487 | Kuba Hospital                                     | 45, Cemetr Street, Ebute Metta, Lagos State                                           |
| 2615 | LA/1488 | Blossom Hospital & Maternity                      | No 8, Martins Street, Junction Bus stop, Igboelerin, Iba LCDA, Lagos State            |
| 2616 | LA/1489 | Patience Clinic                                   | 51, Ariyo St Off Olojo Drive mile 10 B/Stop Ira Qtrs Ojo, Lagos State                 |
| 2617 | LA/1493 | Mary The Queen Hospital & Diagnostic Center       | 29, Babalola Street, Akowonjo, Shasha, Lagos State                                    |
| 2618 | LA/1494 | Renaissance Medical                               | 12, Adeola Odeku Victoria Island, Lagos State                                         |
| 2619 | LA/1496 | Neolife clinic                                    | 5, Olakunle street, Ajegunle, Ikorodu road, Lagos State                               |
| 2620 | LA/1497 | B.A. Clinic                                       | 1, Ademola Close, Maya, Ikorodu, Lagos State                                          |
| 2621 | LA/1498 | Malomo medical center and Maternity home          | 26/28 Runsewe Estate Avenue, Lagos/Abeokuta express way, Ahmadiyyah area, Lagos State |
| 2622 | LA/1499 | Deseret International Hospital                    | 23, Oduduwa Crescent, GRA, Ikeja, Lagos State                                         |
| 2623 | LA/1500 | Deelacs Medical Center                            | 11, Magbon Road, Magbon End, Badagry expressway, Lagos State                          |
| 2624 | LA/1501 | Ever- Life Hospital                               | 3, Peter Edoso Street, Ijanikin, Lagos State                                          |
| 2625 | LA/1502 | Dolu Medical center                               | 5, Sunday saidi street, Okunola, Alimosho, Lagos State                                |
| 2626 | LA/1503 | El- Dunamis Medical Centre                        | 6 King Solomon St, Ologuro B/Stop, Akesan Alimosho, Lagos State                       |
| 2627 | LA/1508 | Dominion Specialist clinics & laboratory services | 18, Doyin Omololu street, Alapere, Ketu, Lagos State                                  |
| 2628 | LA/1509 | Oak Hospital                                      | 191, Lagos road, Ikorodu, Lagos State                                                 |
| 2629 | LA/1511 | Afrique Medical clinic                            | H17, K close, off 3rd avenue, Gowon estate, Egbeda-lagos, Lagos State                 |
| 2630 | LA/1512 | Moye Hospital                                     | 8, Gbadamosi Str, Yakoyo, Ojodu, Berger, Lagos State                                  |
| 2631 | LA/1513 | Dr Abimbola Awoniyi Memorial Hospital             | 183 Bamgbose street Lagos Island, Lagos State                                         |
| 2632 | LA/1514 | Eze Udo Medical Centre                            | 2, Olowojeunjeje street, Ajegunle Apapa, Lagos State                                  |
| 2633 | LA/1516 | Femi Hospital                                     | 41 Bale Street Olodi Apapa, Lagos State                                               |



|      |         |                                                |                                                                                                            |
|------|---------|------------------------------------------------|------------------------------------------------------------------------------------------------------------|
| 2634 | LA/1517 | Trinity Clinic & Maternity                     | No 6, Oyedele Str. By Trinity Clinic Bus Stop, Off Mobil Filling Station Off Igbo-Elerin Road, Lagos State |
| 2635 | LA/1518 | Mount Zion Convalescent Home                   | 11 Sunmonu Str. Off Ogba Rd, Agege, Lagos State                                                            |
| 2636 | LA/1519 | Adeoti Group Nursing Home                      | 106 Ipaja Rd, Sofunde House, Agege, Lagos State                                                            |
| 2637 | LA/1520 | Alalade Memorial Hospital                      | No 67, Oshodi- Abeokuta Express Road, Dopemu, Ikeja, Lagos State                                           |
| 2638 | LA/1521 | Adebayo Living Tower Hospital Ltd              | 8, Adebayo Ojajuni Street, Imeke, Badagry, Lagos State                                                     |
| 2639 | LA/1522 | Araba medical center                           | 122, Ekoru- Agbelekale road, Big Joy B/stop, Abule Egba, Lagos State                                       |
| 2640 | LA/1523 | Grace of God Hospital LTD                      | 3, Abubakar Street, off Pipeline junction, Ekoru Abule-Egba, Lagos State                                   |
| 2641 | LA/1524 | St. Victoria hospital                          | 97, Capitol road, Agege by pass, Lagos State                                                               |
| 2642 | LA/1526 | Temitope Nursing Clinic & Mat. Home            | 1 Yisa street Solanke Bus stop Aboru Iyana Ipaja, Lagos                                                    |
| 2643 | LA/1527 | Blue Sky Hospital                              | 20, Orelope street, Egbeda, Lagos State                                                                    |
| 2644 | LA/1528 | Royal Apex Hospital Ltd                        | 230 Ojo Igbede Rd, Ajangbadi-Ilemba House, Lagos State                                                     |
| 2645 | LA/1530 | Sight Centre Ltd                               | 11 Olubi Str, Opp Town Hall Gate, Ita Elewa, Ikorodu, Lagos State                                          |
| 2646 | LA/1532 | Christ City of Peace Clinic and Maternity Home | 4, Yisa Bello Close, Behind Eduland School, Bakery Bus stop, Egbeda- Lagos State                           |
| 2647 | LA/1535 | Hopewell Hospital Ltd                          | 3, Badiru Kassim Street, Ebute, Ikorodu, Lagos State                                                       |
| 2648 | LA/1536 | Seriki Abimbola memorial hospital              | 1, seriki abimbola street, by Old NEPA, badagry, Lagos State                                               |
| 2649 | LA/1537 | Dental Plus Ltd                                | No. 2 Deji Odunuga Street Off Adebayo Mokuolu Street, Anthony village, Lagos State                         |
| 2650 | LA/1538 | Muskat hospital                                | 9, abbi street off rasaki bus stop, ilemba awori, shibiri road, Lagos State                                |
| 2651 | LA/1539 | Lifegate Specialist Hospital                   | 2B, Abiodun Jagun Str., Ogba , Ikeja, Lagos State                                                          |
| 2652 | LA/1540 | Anthony cardinal okogie's medical center       | 1, akinsegun street, Oko Oba, Agege, Lagos State                                                           |
| 2653 | LA/1541 | Bolutife Nursing Homel                         | 7, Vero Acha street, Jankara, Ijaiye- Ojokoro B/Stop, Lagos State                                          |

|      |         |                                      |                                                                                                       |
|------|---------|--------------------------------------|-------------------------------------------------------------------------------------------------------|
| 2654 | LA/1546 | Salem specialist hospital            | 23/24 Omotoye estate road, off Ipaja road, Orile Agege, Lagos State                                   |
| 2655 | LA/1547 | The Family Clinic                    | 25, Ijesha Road, surulere, Lagos State                                                                |
| 2656 | LA/1549 | Cedar Clinics                        | No 19, Folarin st, off Ladipo st, Mushin, Lagos State                                                 |
| 2657 | LA/1550 | Locket Medicals Ltd                  | 47, Ariyo St, Ira Quarters Ojo Alaba, Lagos State                                                     |
| 2658 | LA/1554 | Onwusikawa children's medical center | 20, Ogunbela Avenue, AGO PALACE, Okota, Lagos State                                                   |
| 2659 | LA/1555 | Al- Sadiq Memorial Convalescent Home | 21, Ayisat Road, Mile 12, Ketu, Lagos State                                                           |
| 2660 | LA/1556 | Sacred Heart Clinic                  | 26A Pelewura Crescent, Apapa, Lagos State                                                             |
| 2661 | LA/1557 | Mary Ade specialist hospital         | 2, Tijani Ashogbon street, ilaje b/stop, Bariga, Lagos State                                          |
| 2662 | LA/1560 | life Fount medical center            | 103 Mosalasi Road, Egan, Igando, Lagos State                                                          |
| 2663 | LA/1561 | Holy Fill Hospital                   | 137, Isawo road, Owotu, Agric, Ikorodu, Lagos State                                                   |
| 2664 | LA/1562 | Care Giver hospital                  | 20 Torikoh Street opp Coca cola Depot, Torikoh badagry, Lagos State                                   |
| 2665 | LA/1563 | West Care Specialist Hospital        | 32, Samuel Street Vulcanizer bus stop Egbeda, Akowonjo, Lagos State                                   |
| 2666 | LA/1564 | Efan hospital & maternity            | 7/9 Alh. Yusuf Adebayo street, coconut b/stop, Olodi Apapa, Lagos State                               |
| 2667 | LA/1565 | Precious gift nursing services       | 1b, isolo road, Egbe (Cele b/stop), beside Egbe bridge hotel, Egbe, Lagos State                       |
| 2668 | LA/1566 | D. Lawrence Clinic                   | 50, Ikorodu road, Jibowo, Lagos State                                                                 |
| 2669 | LA/1567 | Mater Christi Clinic                 | 8A, Bishop Okogie St, Off Bayo Oyewole St, Balogun Bus stop, Ago Palace Way, Okota Isolo, Lagos State |
| 2670 | LA/1568 | St. Nicholas Hospital                | 58 Campbell Street Lagos Island, Lagos State                                                          |
| 2671 | LA/1569 | Royale Medical Centre                | No 1 Piriye Ayubele Street Iyana School, Iyana sch B/stop Iba, Lagos State                            |
| 2672 | LA/1570 | Olufunmlayo medical center           | 40/42 Mba street, Ajegunle, Lagos State                                                               |
| 2673 | LA/1572 | Bolutife Hospital                    | 26, Eweje street, Mafoluku, Oshodi, Lagos State                                                       |

|      |         |                                               |                                                                                                |
|------|---------|-----------------------------------------------|------------------------------------------------------------------------------------------------|
| 2674 | LA/1576 | Goodness Medical Centre                       | 151, Shibiri Road,Opp Otto- Awori Local Council Dev. Area Office, Shibiri - Lagos, Lagos State |
| 2675 | LA/1577 | Krobon clinic                                 | 1, Famuyiwa street, Mongoro Agege off Sebiotimo street behind Oando petroleum, Lagos State     |
| 2676 | LA/1579 | THH Healthcare                                | Plot 1073 4th Avenue, 42 Road Junction, Festac Town, Lagos State                               |
| 2677 | LA/1580 | The Humana Hospital                           | 9, Asabi Cole Str Off Lateef Jakande RD Agidingbi, Ikeja, Lagos State                          |
| 2678 | LA/1581 | Ahmadiya Muslim Hospital                      | 39, Payne crescent, Apapa, Lagos State                                                         |
| 2679 | LA/1582 | Adunmo memorial hospital                      | 8, Folasade Adetunji street off akibu adeniji street, jankara-ijaye , Ojokoro, Lagos State     |
| 2680 | LA/1583 | Ketu_L_Medical services                       | 26/28, faloye street, ketu, ijaniki, Lagos State                                               |
| 2681 | LA/1584 | God's goal hospital                           | 118, olojo drive, ojo-alaba int'l makt, Lagos State                                            |
| 2682 | LA/1586 | Deetab Hospital                               | 21, Bakare Faro Street, Safejo Amukoko, Lagos State                                            |
| 2683 | LA/1587 | Crystal eye consult                           | 140, Bode Thomas, surulere, Lagos State                                                        |
| 2684 | LA/1590 | Adedeinbo medical center                      | 25, Layori soetan, oremeji round about bus stop, Ifako Bariga, Lagos State                     |
| 2685 | LA/1591 | St. Raphael Divine Mercy Specialist Hospital  | Boge Town, Ijede Road, Ikorodu, Lagos State                                                    |
| 2686 | LA/1592 | Madek hospital & maternity home               | 19, association crescent, Abimbola Awoliyi estat, new Oko-Oba, Abule Egba, Lagos State         |
| 2687 | LA/1593 | Rolayo Medical Centre                         | No 5, Sule Mayo Street, Ikorodu, Lagos State                                                   |
| 2688 | LA/1594 | Ogunmodede memorial hospital & mat. Home      | 12, asabi oloyede street off abiola adeyemi street off igando road, ikotun, Lagos State        |
| 2689 | LA/1595 | El-Rhema vision Hospital                      | Plot 129B, D-Close, 3rd avenue, opp. Microfinance bank, Gowon estate, Egbeda, Lagos State      |
| 2690 | LA/1596 | Golden Victory way Hospital LTD               | 49B, Shasha, Lagos State                                                                       |
| 2691 | LA/1597 | ABS MEDICARE CENTER                           | 5, OLA BADMUS STREET OFF MEIRAN COMMAND ROAD, OJA B/STOP, Ajasa via Ipaja, Lagos State         |
| 2692 | LA/1598 | Hallmark clinical and children diagnostic lab | 4 Aradula Close Sabo-Oniba, btw peoples and church bus stops, off Alaba int'l mkt, Lagos State |

|      |         |                                         |                                                                                                   |
|------|---------|-----------------------------------------|---------------------------------------------------------------------------------------------------|
| 2693 | LA/1599 | Ife-Oluwa Clinic Limited                | 12, Turner Eradiri street, off Ojo road bus stop/Jimoh Ojora street, ajegunle, Apapa, Lagos State |
| 2694 | LA/1600 | De right source specialist hospital     | 7a abigi Close off Irepodun Street, off Budland str, Akiode, Lagos State                          |
| 2695 | LA/1601 | Funbi medical center                    | plot 10, Kolawole Ogun close off mosalasi b/stop off old Otta road, Alagbado, Lagos State         |
| 2696 | LA/1602 | New gate Hospital Ltd                   | 84,Ogba Isherin Road Opp Millenium School, Ojodu, Lagos State                                     |
| 2697 | LA/1603 | Tokayo Medical Center                   | 1, Olaleye street, Ikosi ketu, Lagos State                                                        |
| 2698 | LA/1604 | Oladapo medical center                  | KT Petrol Station Complex, Beside First Bank , Omitoro, Ijede RD, Lagos State                     |
| 2699 | LA/1605 | Teslon Pharmacy Nig Ltd                 | 204, lagos Rd, Agric B/S Ikorodu, Lagos State                                                     |
| 2700 | LA/1608 | Iwalewa Conv. Health Centre             | 20 Erelu Danisa Str. Off Adeshina Str, Ijeshatedo, Lagos State                                    |
| 2701 | LA/1610 | Dee Tee & Kay maternity Home & Clinic   | 24, Ondo str. Oke-Ira, Ojodu, Ikeja, Lagos State                                                  |
| 2702 | LA/1611 | Cottage Medicals                        | 45, Maye Street, Off Montgomery Road, Yaba, Lagos State                                           |
| 2703 | LA/1613 | Magodo Specialist Hospital LIMITED      | 10, Jaiye Oyedotun street, Magodo GRA, Lagos State                                                |
| 2704 | LA/1614 | Tofaan's Hospital                       | 15 ,Asipa road, amule, bus stop, ayobo, Lagos State                                               |
| 2705 | LA/1617 | Sparkview Hospital                      | 20A Wilmer Road, Isheri-Oke Ojodu Beger Lagos State                                               |
| 2706 | LA/1618 | Limad Hospital                          | No. 30, Abusi Edumare Street, Ajasa Command, Lagos State                                          |
| 2707 | LA/1619 | Ibirinade Coker Memorial Hospital       | 45/47, Karimu Street, off Ojuelegba Road, Surulere, Lagos State                                   |
| 2708 | LA/1620 | Leye clinic & maternity home            | 4, salako street, Alpere, ketu, Lagos State                                                       |
| 2709 | LA/1621 | Morayo clinic                           | No 1 Morayo lane, iworo-ajido road; imeke-badagry, Lagos State                                    |
| 2710 | LA/1622 | Toluwalope Maternity Centre and Clinic. | 1, Toluwalope Close, km 32, Lagos/Badagry Expressway, Lagos State                                 |
| 2711 | LA/1623 | Hopeland hospital & maternity           |                                                                                                   |
| 2712 | LA/1624 | Treasure Hospital                       | 1 Chief Obidegwu st Unity Estate off Iba rd, Iba, Lagos State                                     |
| 2713 | LA/1626 | Alimosho General Hospital               | LASU/Isheri road, Igando, Lagos State                                                             |

|      |         |                                               |                                                                                                 |
|------|---------|-----------------------------------------------|-------------------------------------------------------------------------------------------------|
| 2714 | LA/1627 | Diamond Hospital                              | 7, Owhin street, off 78, Palm Avenue, Papa Ajao, Mushin, Lagos State                            |
| 2715 | LA/1629 | Hero medical center                           | 8, Igunnu street by oja bus stop, orile iganmu lagos, Lagos State                               |
| 2716 | LA/1630 | Akinola Medical Centre                        | 5 Progress College Road New Oko Oba Agege, Lagos State                                          |
| 2717 | LA/1632 | Croabay Medical Centre                        | 115, Ikotun-Idimu Road, Foursquare Busstop, Idimu, Lagos State                                  |
| 2718 | LA/1633 | Mofeayo Nursing & Maternity Home              | 2 Abimbola street, Egan, Off Modina Rd, Alimosho L.G.A. Lagos State                             |
| 2719 | LA/1637 | Jomark Hospital & Maternity Home              | 54, community road off ago palace way, Ago Okota, Lagos State                                   |
| 2720 | LA/1638 | De- Solidrock Maternity and Healthcare Centre | 22, Cele road, Oluwatedo Estate by Ile-Iwe Bus stop Isashi, Off Badagry Express way Lagos State |
| 2721 | LA/1642 | Mac Toye Hospital                             | 205, Ijegin road, ijegin ikotun, Lagos State                                                    |
| 2722 | LA/1643 | Babalola hospital and Maternity               | 10, osungboye street, Akilo Agege, Lagos State                                                  |
| 2723 | LA/1645 | Cradle medical center                         | 26, Dopemu road, Agege, Lagos State                                                             |
| 2724 | LA/1647 | O & S Hospitals                               | 13 Ahme street, Masha Surulere, Lagos State                                                     |
| 2725 | LA/1648 | Fuja Medical Centre                           | 23 Elegbata St. Apongbon, Lagos Island, Lagos State                                             |
| 2726 | LA/1649 | Fran Andrews Clinic                           | No 74, Ijessa Road, Ijeshatedo, Surulere, Lagos State                                           |
| 2727 | LA/1653 | St. Jacob Nursing Home                        | 15, Kamoru Adeyemi Street, Idimu, Lagos State                                                   |
| 2728 | LA/1654 | p-AFONJA NURSING SERVICES                     | 5, OLU-ODUSISI Street, Ologunye b/stop, along Igando road, ikotun, Lagos State                  |
| 2729 | LA/1655 | D-Shallom Healthcare Center                   | 32, Amusa Street, Igando, Lagos State                                                           |
| 2730 | LA/1656 | De-Best maternity & convalescent home         | 10, Olatunji Oyeleke Avenue, Omitoro Bus stop, Ijede road, Lagos State                          |
| 2731 | LA/1657 | St. Joseph Clinic                             | St. Joseph Catholic Church, Kinkiri Apapa, Lagos State                                          |
| 2732 | LA/1658 | True Care Model Hospital Ltd                  | 19, AdeyemiApena Street,Papa, Epe. Behind The General Hospital, Epe Lagos State                 |
| 2733 | LA/1659 | Odyras hospital                               | 198, association avenue, ikotun, Lagos State                                                    |
| 2734 | LA/1660 | Bidems Victory Hospital                       | 8, Simco Umemmeku Street, Off Isawo, Agric, Ikorod, Lagos State                                 |

|      |         |                                         |                                                                                    |
|------|---------|-----------------------------------------|------------------------------------------------------------------------------------|
| 2735 | LA/1661 | Nigeria Customs service Medical Centre, | Nigeria Customs Service Medical Centre, Seme Badagri Lagos State                   |
| 2736 | LA/1662 | Mojol Hospital Laboratory               | 20, Church Street, Sasa, Bammake, Lagos State                                      |
| 2737 | LA/1663 | Josek Medical Centre                    | 3 Ifesowapo st Okeira Ogba Ikeja, Lagos State                                      |
| 2738 | LA/1665 | Ife-Oluwani Nursing Home                | 6, Aina street, Ahmadiyya, Ojokoro, ifako Ijaiye, Lagos State                      |
| 2739 | LA/1666 | Remsol Convalescent Nursing Home        | 12 Safejo Close, Amukoko, Apapa, Lagos State                                       |
| 2740 | LA/1667 | New merit hospitals limited             | 29.Oladoje street,Gengeto,Okooba, Agege Lagos State                                |
| 2741 | LA/1668 | Golden care Hosp.                       | 235, old ojo road, opposite Agboju market, by Lion junction, Lagos State           |
| 2742 | LA/1670 | Prestige medical center                 | 6a, Aina Obembe Street, Oluwaga Ipaja, Lagos State                                 |
| 2743 | LA/1672 | INTON HOSPITAL                          | 6, ADENEKAN SALAKO STREET, OFF IJAYE ROAD BY CATERPILLAR B/STOP, OGBA, Lagos State |
| 2744 | LA/1674 | Ewushu Hospital                         | 6, borokini dada close , Ikorodu, Lagos State                                      |
| 2745 | LA/1675 | First Mainland hospital                 | 66, Sanni Balogun street, New Oko Oba Agege, Lagos State                           |
| 2746 | LA/1677 | General Hospital, Mushin                | 48, oliyide street, Mushin, Lagos State                                            |
| 2747 | LA/1678 | Amodu adesola memorial hospital         | 5, AANIBABA STREET, Ikorodu, Lagos State                                           |
| 2748 | LA/1679 | New Ikeja Hospital and Maternity Home   | 15, Gbajobi street off Obafemi awolowo way, Ikeja, Lagos State                     |
| 2749 | LA/1681 | Rabboni specialist Hospital             | 7, Eyiowuawi street, Pedro Lagos Lagos State                                       |
| 2750 | LA/1682 | The Vine Medical Centre                 | 115 New Ipaja Rd, Akin Ogun- Ipaja, Lagos State                                    |
| 2751 | LA/1685 | New Divine Grace Nursing Home           | 60 Abamishe Street off Cele Busstop Agodo Egbe, Lagos State                        |
| 2752 | LA/1687 | General Hospital Ibeju Lekki            | lagos road, Akodo, Lagos State                                                     |
| 2753 | LA/1688 | Swift eye care                          | 9, Amodu Ojikutu str. Off Bishop Oluwole str V/I, Lagos State                      |
| 2754 | LA/1689 | His Stripes Specialist Hospital         | 19/22 Savage St. Orile- Iganmu, Surulere, Lagos State                              |
| 2755 | LA/1690 | AS- Salam Convalescent Centre           | Km 34, Lekki- Epe Express Way, Lakowe, Ibeju- Lekki, Lagos State                   |
| 2756 | LA/1692 | O-Jibol Medical Centre                  | 119,Tolu Road, Olodi, Apapa, Lagos State                                           |
| 2757 | LA/1695 | Lucy Memorial Hospital                  | 62, Ago Palace Way, By Skye Bank, Okota, Lagos State                               |
| 2758 | LA/1696 | Sanctuary Hospitals Ltd                 | 59, Bajulaiye Road, Shomolu, Lagos State                                           |

|      |         |                                                            |                                                                                             |
|------|---------|------------------------------------------------------------|---------------------------------------------------------------------------------------------|
| 2759 | LA/1697 | Mayflower Clinics                                          | 1, Ibari Str, Ifako, Agege, Lagos, Lagos State                                              |
| 2760 | LA/1699 | Mediservices Community Hospital                            | 245 Ipaja Road, Ijaja, Lagos State                                                          |
| 2761 | LA/1704 | Adekite Clinic                                             | 5, Otubu Est, Ijegun, Benina Satellite Town, Lagos                                          |
| 2762 | LA/1705 | Emmanuelle Medical Services                                | 22, Idimu Road, Ikotun, Lagos                                                               |
| 2763 | LA/1706 | Regency Specialist Hospital                                | 32, Ajayi Road, Off Yaya Abatan Road, Ogba Lagos State.                                     |
| 2764 | LA/1707 | New St. Louis Hospital & Maternity Centre                  | 1, Oiriero Street, By Ogooluwa Bus Stop, Ishashi Town, Ojo Lagos.                           |
| 2765 | LA/1715 | Rehoboth Pharmaceuticals Limited                           | No. 12 IsholaAnigbajumo Street, Off Afaraogun Street, Lagos                                 |
| 2766 | LA/1718 | Ife Oluwa Nursing Home                                     | 6, Aina Street, Ahmadiyya, Ojokoro, Ifako Ijaiye Lagos State.                               |
| 2767 | LA/1719 | Blooming care Hospital                                     | 30. Baale Animashahun Road Alakuko.                                                         |
| 2768 | LA/1721 | Gods Of Kindomlife Specialist Hospital And Maternity Home. | No. 9 Ogundipe Street, Checking Point B/Stop, Off Badagry Expressway, Lagos State.          |
| 2769 | LA/1723 | Eboa Medical Center                                        | 48, Yakubu Street, Off Jimoh Balogun Street, Cele Bus Stop, Ikosi Ketu Lagos State          |
| 2770 | LA/1725 | Healing Virtues Hospital                                   | 21, Odubakin Street, By Abule- Egun Bus- Stop, Baruwa, Ipaja, Lagos State                   |
| 2771 | LA/1726 | Renue Clinic                                               | 5th Avenue, R Close, House 1, Festac Town, Lagos State                                      |
| 2772 | LA/1728 | Life Spring Hospital                                       | No. 20, Adeboye Gbadamosi Street (Formally Misibau Mojeeb Street), Ago, Okota, Lagos State. |
| 2773 | LA/1731 | Outreach Women And Children Hospital                       | 4th Avenue By 3rd Avenue Junction, Festac Town Lagos State                                  |
| 2774 | LA/1732 | Life Pillar Clinic And Maternity Home                      | 1, Solomon Abiodun Street, Rainbow Bus Stop, Ijegemo Lagos State.                           |
| 2775 | LA/1734 | Adebambo Hospital                                          | 38, Muri- Ojora Street, Amukoko, Lagos State                                                |
| 2776 | LA/1735 | Safejo Medical Centre                                      | 14, Safejo Road, Safejo, Amukoko Ajegunle, Lagos State                                      |
| 2777 | LA/1740 | Omoju Medical Centre & Maternity                           | 14, Olaijbe Street, Berruwa, Ipaje, Lagos State.                                            |
| 2778 | LA/1743 | Yomi Nursing And Maternity Home                            | 7, Olorunosebi Street, Off Oluwalogbon Street, Ketu Lagos State.                            |
| 2779 | LA/1744 | Yomi Nursing And Maternity Home                            | 7, Olorunosebi Street, Off Oluwalogbon Street, Ketu Lagos State.                            |
| 2780 | LA/1745 | Lakefront Hospital                                         | 3, Lakefront Street, Off Agidi Road, Alapere- Ketu Lagos State                              |

|      |         |                                                       |                                                                                                         |
|------|---------|-------------------------------------------------------|---------------------------------------------------------------------------------------------------------|
| 2781 | LA/1746 | Peniel Noble Maternity                                | No. 30, Adegboyega, Agiliti Mile 12, Ketu, Lagos State.                                                 |
| 2782 | LA/1747 | Oar Medical Centre                                    | No. 18, Musa Eromon Street, Igoke Estate, Oke- Odo, Lagos State.                                        |
| 2783 | LA/1748 | New Covenant Hospital & Maternity                     | No. 1, Adetola Street, By Conoil Filling Station, Aguda Surulere Lagos State                            |
| 2784 | LA/1749 | Flokel Specialist Hospital                            | 12, Okota Road, Isolo, Lagos State                                                                      |
| 2785 | LA/1750 | De Shiloh Convalescent Home                           | 2, Oyefesobi Street, Ikosi Ketu, Lagos State                                                            |
| 2786 | LA/1751 | De- Immaculate Maternity Home                         | Chief Owolowo Street, Adamo Ikorodu, Lagos state                                                        |
| 2787 | LA/1752 | Glad Tidings Medical Centre                           | No. 1, Old 3, Church Street, Off Gbadamosi Opesa Street, Opeki B/Stop, Ipaja, Lagos State               |
| 2788 | LA/1753 | Akanbi Memorial Hospital                              | 27, Yetunde Kuforji Street, I.B.T.C B/Stop Ayobo Lagos State                                            |
| 2789 | LA/1754 | Vineyard Nursing Home                                 | 13, Kareem Street, Shibiri, Off Ajamgbadi, Ojo, Lagos State                                             |
| 2790 | LA/1755 | Peterhoff Specialist Hospital                         | 4, Ganiyu Osebaby Street, Off Dr. Fasheun Avenue, Ago, Lagos State.                                     |
| 2791 | LA/1757 | Ovansa Nursing Home (Annex)                           | 2, Sholanle Street, Odo- Eran, Itire, Lagos State                                                       |
| 2792 | LA/1758 | Ovansa Nursing And Maternity Home                     | 24, Oremeji Street, Ijeshatedo, Surulere, Lagos State                                                   |
| 2793 | LA/1759 | Louise Med Hospital Limited                           | Plot 14, Blk. 95, Omorinre Johnson Street, Lekki Phase 1, Lagos State                                   |
| 2794 | LA/1760 | Riverside Diagnostic Hospital Limited                 | Plot 1397e Block 63a, Shalom Road, Off Raji Rasaki Road, Near Apple Junction, Amuwo Odofin, Lagos State |
| 2795 | LA/1761 | Synergy Medicals                                      | 27, Kujore Street, Ojota, Lagos State                                                                   |
| 2796 | LA/1762 | Bronila Medical Services Limited                      | Oshota Bus Stop By Elepe, Ijede Road Ikorodu, Lagos State.                                              |
| 2797 | LA/1763 | The Excellence Hospital (Omots Medical) Services Ltd. | 5, Alogba Street, Off Owode- Ibeshe Road, By Voice Of Nigeria, Ebute, Ikorodu, Lagos State.             |
| 2798 | LA/1764 | New Nigeria Hospital                                  | 34, Dillion Street, Behind Kirikiri Medium Prison, Kirikiri Town Lagos State.                           |
| 2799 | LA/1766 | Golden Mother Maternity Home                          | 27, College Road, Opp. Ifako Ijaiye General Hospital Lagos State                                        |
| 2800 | LA/1769 | St. Julius Hospital                                   | No. 17, Adekunbi Street, off Toyin Street, Ikeja, Lagos                                                 |



|      |         |                                   |                                                                                              |
|------|---------|-----------------------------------|----------------------------------------------------------------------------------------------|
| 2801 | LA/1771 | Ibijola Medical Centre,           | Ibiye Off Km 34, Badagry Express Way, Ibiye Town, Olorunda LCDA Lagos State                  |
| 2802 | LA/1772 | Godwin Nursing Home               | 11, Owokoniran Street, Idimu, Lagos State                                                    |
| 2803 | LA/1773 | Faith Nursing Home                | 41B, Segun Awowowo Street, Ejigbo, Lagos State                                               |
| 2804 | LA/1774 | Jon Fem Hospital                  | 52, Iseyin Street, Off Oyewole Street, Palmgroove Kupetu, Palmgroove, Lagos State.           |
| 2805 | LA/1775 | NNPC Clinic                       | No. 1B, Muri Okunola Street, Lagos State                                                     |
| 2806 | LA/1776 | Ajowa Nursing Home                | 12, Emmanuel Daodu St, Araromi Bus-Stop, Alimosho,Iyana Ipaja, Lagos State.                  |
| 2807 | LA/1777 | Jola Oluwa Clinic Centre          | 33, Kayode Koyejo Street, Off Liasu Rd. Idimu Lagos State                                    |
| 2808 | LA/1780 | A Harmony Clinic & Maternity Home | 10, Ekundayo Road, Opp. Holy Child Primary School, Badagry, Lagos State                      |
| 2809 | LA/1781 | Star Hospital & Maternity         | 5, Oremeji Street Off Lawanson Road, Itire, Surulere Lagos State                             |
| 2810 | LA/1782 | Sherriff Clinic/Hospital          | 1, Gbadamosi Eletu Street, Osapa London, Eti- Osa West Lagos State                           |
| 2811 | LA/1783 | Pike Medical Centre               | 63B, Okesuna Street, Island, Lagos State                                                     |
| 2812 | LA/1784 | Avon Medical Services LTD         | 8, Adedamola Ojomo Close, Off Bode Thomas, Surulere, Lagos State                             |
| 2813 | LA/1785 | Owutu Clinic And Hospital         | 2 Ayorinde Kadejo Street, Mart-k Bus Stop, Owutu, Ikorodu Lagos State                        |
| 2814 | LA/1786 | Oyinlola Clinic                   | 25, Ajiboye Street, Alapere-Ketu Lagos State                                                 |
| 2815 | LA/1787 | Isuti Medical Centre              | No. 16, Steve Igbasan Street, Off Isuti Rd. Egan, Lagos State                                |
| 2816 | LA/1788 | Kingswill Specialist Hospital     | 3, Ayinuola Close/18b Rafiu Babatunde Road, By Apple Junction Amuwo- Odofin Lagos State      |
| 2817 | LA/1789 | Harris –Shibiri Medical Center    | 65 Ekunpa-Ajewamiwa Road, Whitehouse Busstop, Ojo Lagos State                                |
| 2818 | LA/1790 | Emabal Clinic & Maternity Centre  | 44b Aiyetoro Street, Aguda, Lagos State                                                      |
| 2819 | LA/1791 | Sure Hope Clinic                  | 1, Osibanjo Close, Aso Rock B/Stop, Igbo- Olomu, Off Isawo Road, Agric, Ikorodu, Lagos State |

|      |         |                                       |                                                                                                                                      |
|------|---------|---------------------------------------|--------------------------------------------------------------------------------------------------------------------------------------|
| 2820 | LA/1792 | Dele Hospital                         | 15, Ajasa Lamberu Street, Off Obafemi-Awolowo Road, Oke Ota-Ona, Ikorodu, Lagos State                                                |
| 2821 | LA/1793 | St. Williams Hospital                 | 16, Adeeko Olusanya Street, Federal Site Services Scheme, Abule Odu Saliat B/Stop, Lagos State                                       |
| 2822 | LA/1794 | Bee Hess Hospital                     | 155, Akowonjo Road, Akowonjo , Lagos State                                                                                           |
| 2823 | LA/1796 | Lifesource Hospital                   | Plot 10, Jajo Estate, After Bethel School, Along Mowon-La Road, Ijede LCDA, Ikorodu, Lagos State                                     |
| 2824 | LA/1797 | Godbless Medical Centre               | 15, Camp Davies Road, Orisumbare, Ayobo Lagos                                                                                        |
| 2825 | LA/1800 | Quantum Medicare                      | No.28, Ajanaku Street, off Salvation Road, off Opebi Road, Ikeja. Lagos State                                                        |
| 2826 | LA/1801 | Theolad Hospital                      | 51, Jagunmolu Street Temlie Bus Stop By Oando Filling Station, Bariga Lagos State                                                    |
| 2827 | LA/1802 | Al-Afiat Convalescent/ Maternity Home | 27, Aina Road, Agiliti, Mile 12, Ketu, Lagos State                                                                                   |
| 2828 | LA/1803 | Mercy Stripes Specialist Hospital     | 30, Philip Taiwo Street, Coker Estate, Orisumbare, Shasha Lagos Lagos State                                                          |
| 2829 | LA/1805 | Stevans Medical Centre                | 17,Ori-Okuta Road, off Isawo Road, Agric, Ikorodu, Lagos                                                                             |
| 2830 | LA/1807 | Theo Hospital                         | 25, Davies Street, Ketu, Lagos State                                                                                                 |
| 2831 | LA/1808 | Ketu-L-Medical Services (Annex)       | Ketu Medical Centre, opp. AP Petrol Station, Abule B/Stop, off Iyana Era B/Stop, off Lagos –Badagary Exp. Way, Ijanikin, Lagos State |
| 2832 | LA/1809 | Owolola Bethel Health Care Services   | 2, Semiu Tiamyu Street, Hilltop Estate, Pipeline Aboru, Lagos State                                                                  |
| 2833 | LA/1810 | Dandy Medical Centre                  | No.3,Olayiwola Street, New Oko-Oba, Abule-Egba, Lagos State                                                                          |
| 2834 | LA/1811 | Davestar Hospital                     | No.1, J.K. Adewunmi Osun St. By Aristo Bus Stop, off Ijegun Road, Isheri Osun, Alimosho Lagos State                                  |
| 2835 | LA/1812 | Pakal Medical & Hospital LTD          | 28,Community Rd Obadore, off Lasu-Isheri Express Road, Alimosho Lagos State                                                          |
| 2836 | LA/1813 | Macedonia Specialist Hospital         | 28,Ijaiye Road, Ogba                                                                                                                 |
| 2837 | LA/1816 | De-Immaculate Clinic                  | Ijede Road, Church Bus -Stop, Itamaga, Ikorodu, Lagos State                                                                          |

|      |         |                                                 |                                                                                                          |
|------|---------|-------------------------------------------------|----------------------------------------------------------------------------------------------------------|
| 2838 | LA/1818 | Boye Convalescent And Maternity Home            | No 4, Kasumu Street, Shangisha/Magodo, Lagos, Lagos State                                                |
| 2839 | LA/1821 | Kola Christwealth Hospital                      | No 40b, Ire-Akari Estate Road, Isolo, Lagos, Lagos State                                                 |
| 2840 | LA/1822 | Our Lady and St. Francis Catholic Hospital      | Along Super Flamingo Street, Toga-Zanmu Village, Lagos/Badagry Expressway, Lagos State                   |
| 2841 | LA/1826 | Makog Hospital                                  | 3, Agbaje Salami Street, Off Cynergy Hotel, Free Trade Zone Road, Magbon-Alade, Ibeju-Lekki, Lagos State |
| 2842 | LA/1828 | Mike-Bethel Hospital                            | 2, Odunsi Street, Somolu Odunsi Bus Stop, Bariga, Lagos State                                            |
| 2843 | LA/1829 | Theolad Hospital                                | 51, Jagunmolu Street, Temple Bus Stop, By Oando Filling Station, Bariga, Lagos State                     |
| 2844 | LA/1830 | Luli Maternity Home                             | Plot 70, Agbolade-Ogunniyi Street, Oworonsoki, Lagos State                                               |
| 2845 | LA/1831 | Westcare Hospital                               | 31, Ifoshi Road, Opposite Garisalam Central Mosque                                                       |
| 2846 | LA/1832 | Divine Favours Maternity Home                   | 27, Kareem Oyelade Street, Papa Ashafa, Agege, Lagos State                                               |
| 2847 | LA/1834 | Shanu Medical Centre                            | 8, Dada Apena Close, Behind GT Bank, Ikorodu Road, Ikorodu, Lagos State                                  |
| 2848 | LA/1835 | Healing Oak Medical And Healthcare Centre       | 65, Dada Street Off Omomo, off Ibari, off Iju Road, Ifako-Ijaiye, Lagos State                            |
| 2849 | LA/1836 | Samas Hospital                                  | 24, Aina Obembe Street, Off Oluwaga Bus-Stop, Ipaja-Lagos, Lagos State                                   |
| 2850 | LA/1837 | IFPF Hospital                                   | 374, Ikorodu Road, Maryland, Lagos State                                                                 |
| 2851 | LA/1839 | St. Edward Specialist Hospital & Cardiac Centre | 4, Dolapo Oshonaike Street Off Ado Road, Ajah, Lekki, Lagos State                                        |
| 2852 | LA/1840 | Mustard Seed Maternity Home                     | 4, Abayomi Street, Lawanson, Surulere, Lagos, Lagos State                                                |
| 2853 | LA/1842 | Boot Hospitals                                  | 47b James Robertson/ Joseph Shyngle Close, Surulere, Lagos State                                         |
| 2854 | LA/1846 | David & Daniel Nursing Home                     | Ologunfe Road, End Of Ologunfe By Ologunfe Bus-Stop, Awoyaya, Ibeju-Lekki, Lagos State                   |
| 2855 | NG/0002 | General Hospital, Agaie                         | Agaie, Minna                                                                                             |
| 2856 | NG/0003 | Federal Medical Centre, Bida                    | Bida.                                                                                                    |
| 2857 | NG/0004 | Maraba Hospital - Bida                          | Minna Road. Bida                                                                                         |
| 2858 | NG/0009 | Fem-Universal Pharmacy                          | ABK House, BCC Road, Bida                                                                                |

|      |         |                                                       |                                                        |
|------|---------|-------------------------------------------------------|--------------------------------------------------------|
| 2859 | NG/0012 | Taimako Hospital                                      | Se 158 Sabon Gari, Minna                               |
| 2860 | NG/0013 | General Hosiptal, Minna.                              | Hospital Road, Minna.                                  |
| 2861 | NG/0014 | IBB Specialist Hospital                               | Biko Road, Chanchangi, Minna                           |
| 2862 | NG/0015 | Mustapha Hospital & Maternity                         | No. 1 Lafia Street, "F" Layout, Off Bosso Road, Minna. |
| 2863 | NG/0016 | Bay Specialist Hospital                               | Plot 33, Bay Clinic Road, Tunga, Minna                 |
| 2864 | NG/0017 | Imani Specialist Hospital                             | Minna.                                                 |
| 2865 | NG/0018 | The Savannah Medical Consultancy, Bay Clinic Road     | David Mark Road, after INEC Office, Opposite FMO Agric |
| 2866 | NG/0020 | Standard Hospital                                     | Old Airport Quarters, Minna                            |
| 2867 | NG/0021 | Unity Clinic                                          | Bida Road, Kpakungu, Minna                             |
| 2868 | NG/0022 | Alheri Specialist Hospital                            | Minna                                                  |
| 2869 | NG/0023 | Kowa Clinic                                           | Bosso, Minna                                           |
| 2870 | NG/0024 | General Hospital, Mokwa                               | Mokwa                                                  |
| 2871 | NG/0025 | Care Specialist Hospital                              | Beside Custom Office, Minna                            |
| 2872 | NG/0047 | Basic Health Clini                                    | Doko                                                   |
| 2873 | NG/0048 | Goje Medical Centre                                   | Kontangora                                             |
| 2874 | NG/0049 | General Hospital, Kontangora                          | Kontangora                                             |
| 2875 | NG/0053 | Rural Hospital, Lapai                                 | Lapai                                                  |
| 2876 | NG/0059 | Base Medical Centre, Suleja                           | Suleiman Barau Road, Opp. Rimeview Hotel, Suleja       |
| 2877 | NG/0060 | Citizen Hospital                                      | Suleja                                                 |
| 2878 | NG/0061 | Fary Group Clinic                                     | 105, Suleiman Barau Road, Suleja                       |
| 2879 | NG/0062 | General Hospital, Suleja                              | Suleja                                                 |
| 2880 | NG/0063 | Berith Specialist Hospital                            | Kwamba Area, Minna Road, Suleja                        |
| 2881 | NG/0064 | Maraba Hospital - Suleija                             | Maganda, Off Suleiman, Barau Road                      |
| 2882 | NG/0065 | Suzan Memorial Clinic and Maternity                   | Uphill Suleja Near Suleja Club,G.R.A.                  |
| 2883 | NG/0066 | Delight Hospital                                      | Plot 66, Suleiman Barau Road, Suleja                   |
| 2884 | NG/0081 | Rural Health Hospital, Wushishi                       | Wushishi                                               |
| 2885 | NG/0082 | Comprehensive Health Care Centre Zungeru, Niger State | Comprehensive Healthcare center, Zungeru               |
| 2886 | NG/0085 | General Hospital, Kutigi                              | Kutigi                                                 |
| 2887 | NG/0086 | General Hosiptal, Tungan Magajia                      | Tungan Magajia                                         |
| 2888 | NG/0087 | Rural Hospital, Nasco Road                            | Nasco Road                                             |
| 2889 | NG/0088 | General Hospital, New Bussa                           | New Bussa                                              |
| 2890 | NG/0091 | NAF Medical Centre                                    | NAF Station, Minna                                     |
| 2891 | NG/0092 | 99 AWS Medical Centre                                 | NAF Base, Kainji                                       |
| 2892 | NG/0093 | Top Medical Centre                                    | Plot 4 Paiko Road, Tunga, Minna, Niger State           |
| 2893 | NG/0094 | General Hospital, Kagara                              | Kagara, Niger State                                    |
| 2894 | NG/0098 | 31 AB MC, Minna                                       | Minna, Niger State                                     |
| 2895 | NG/0099 | 311 AR MRS Kontagora                                  | Kontagora, Niger State                                 |
| 2896 | NG/0100 | 313 AR MRS, Minna                                     | Minna, Niger State                                     |
| 2897 | NG/0101 | 221 LTK Bn MRS Kainji                                 | Kainji, Niger State                                    |

|      |         |                                                        |                                                          |
|------|---------|--------------------------------------------------------|----------------------------------------------------------|
| 2898 | NG/0102 | Wasiha Medical Centre                                  | Plot 10B Off Niiteco Road, Tunga, Minna                  |
| 2899 | NG/0103 | Gilead Medical clinic & Maternity                      | SW 416 K/Wari Rd, Minna                                  |
| 2900 | NG/0104 | Bida Clinic                                            | Opposite Central Market, Bida                            |
| 2901 | NG/0105 | Great Faith Medical Clinic                             | Tunga Low Cost, Minna                                    |
| 2902 | NG/0106 | Masol Hospital & Maternity                             | Off Our Lady Of Fatima Church, Niteco Road, Tunga, Minna |
| 2903 | NG/0107 | Liberty Hospital                                       | Opposite 1st Bank Plc, Minna Road, Suleja                |
| 2904 | NG/0109 | Suleja Hospital Ltd                                    | 11, Hassan Dallalu Road, Opp. City Gate Chemist, Suleja. |
| 2905 | NG/0110 | Gaskiya Clinic                                         | Victory Road, Suleja, Niger State                        |
| 2906 | NG/0111 | Bisi Clinic & Maternity                                | SW 16, Benin Street, Minna, Niger State                  |
| 2907 | NG/0126 | Royal Care Hospital                                    | Randan Ruwa Bosso Road, Minna                            |
| 2908 | NG/0127 | DSS Clinic                                             | Minna, Niger State                                       |
| 2909 | NG/0129 | Police Clinic, Minna                                   | Minna, Niger State                                       |
| 2910 | NG/0130 | Federal Polytechnic Bida Medical Centre                | Bida, Niger State                                        |
| 2911 | NG/0131 | Federal College of Education Medical Centre, Kontagora | Kontagora, Niger State                                   |
| 2912 | NG/0132 | Fed. Polytechnic Medical Centre, Kontagora             | Kontagora, Niger State                                   |
| 2913 | NG/0134 | SOLACE HOSPITAL                                        | HASSAN DALHATU ROAD, SULEJA                              |
| 2914 | NG/0135 | SOKOJI HOSPITAL                                        | POLY ROAD, BIDA                                          |
| 2915 | NG/0136 | RAILWAY INDUSTRIAL CLINIC                              | RAILWAY COMPOUND MINNA                                   |
| 2916 | NG/0137 | NASSARA CLINIC AND MAT                                 | 131, MAIGARI GODABE ROAD, GRA, KONTAGORA                 |
| 2917 | NG/0139 | LUCAS HOSPITAL                                         | BESIDE ASSEMBLY OF GOD CHURCH MADALA                     |
| 2918 | NG/0140 | KAINJI MEDICAL CENTER                                  | 48 KAINJI ROAD, PO Box 171, New Bussa                    |
| 2919 | NG/0141 | Federal College Of Education Med.center                | KONTAGORA                                                |
| 2920 | NG/0143 | faith clinic and maternity                             | kotaworo area, bida                                      |
| 2921 | NG/0144 | AI-AZEEZ MEDICAL CENTER                                | OPP MADENGE STATION, LAGOS-KADUNA ROAD, KONTAGORA        |
| 2922 | NG/0157 | Supreme Hospital                                       | Behind Christ Apostolic Church, Rafin Sanyi, Suleja      |
| 2923 | NG/0164 | Rural Hospital, Kuta                                   | Gwada Road, Kuta                                         |
| 2924 | NG/0167 | Rural Hospital, Gurara                                 | Hospital Road, Gawu-Babangida                            |
| 2925 | NG/0168 | General Hospital                                       | Hospital Road, Kafin-Koro                                |
| 2926 | NG/0169 | Rural Hospital, Bida                                   | Minna Road, Bida                                         |
| 2927 | NG/0171 | Rhema Medical Centre                                   | Near Kontagora General Hospital                          |
| 2928 | NG/0172 | Lokoto Health Clinic                                   | Chanchaga                                                |
| 2929 | NG/0174 | Shakwata Health Clinic                                 | Chanchaga                                                |
| 2930 | NG/0175 | Maternal & Child Health. Maitumbi                      | Maitumbi                                                 |
| 2931 | NG/0176 | Maternal & Child Health. Gwari Road                    | Gwari Road                                               |
| 2932 | NG/0177 | Maternal & Child Health. Old Airport Road              | Chanchaga                                                |
| 2933 | NG/0178 | Maternal & Child Health. Tudun Wada                    | Tunga                                                    |
| 2934 | NG/0179 | Passi Health Clinic                                    | Passi                                                    |
| 2935 | NG/0180 | Taiyi (A) Health Clinic                                | Taiyi                                                    |

|      |         |                                         |                                  |
|------|---------|-----------------------------------------|----------------------------------|
| 2936 | NG/0181 | Taiyi (B) Health Clinic                 | Taiyi                            |
| 2937 | NG/0182 | Primary Health Clinic, Dabbo            | Dabbo                            |
| 2938 | NG/0183 | PPFN Clinic Chanchaga                   | Chanchaga                        |
| 2939 | NG/0184 | PPFN Clinic Barkin Sale                 | Chanchaga                        |
| 2940 | NG/0186 | FSP Medica Outfit, Limawa               | Chanchaga                        |
| 2941 | NG/0187 | Primary Health Clinic, Dutse Kura Hausa | Chanchaga                        |
| 2942 | NG/0188 | Primary Health Clinic, Dutse Kura Gwari | Chanchaga                        |
| 2943 | NG/0189 | School Health Clinic, Bosso Road        | Chanchaga                        |
| 2944 | NG/0190 | Maternal & Child Health Centre, Gulu    | Lapai                            |
| 2945 | NG/0191 | Health Clinic, Eddo                     | Lapai                            |
| 2946 | NG/0193 | Basic Health Clinic, Gulu               | Lapai                            |
| 2947 | NG/0194 | Primary Health Clinic, Evuti            | Lapai                            |
| 2948 | NG/0195 | Health Post, Gbedako                    | Lapai                            |
| 2949 | NG/0196 | Health Clinic, Zago                     | Lapai                            |
| 2950 | NG/0197 | Health Post, Chepa                      | Lapai                            |
| 2951 | NG/0198 | Pelemi Health Post                      | Pelemi Village                   |
| 2952 | NG/0199 | Health Clinic, Gupa                     | Lapai                            |
| 2953 | NG/0200 | Basic Health Clinic, Muye               | Lapai                            |
| 2954 | NG/0201 | Health Post, Egba                       | Lapai                            |
| 2955 | NG/0202 | Health Post, Yelwa                      | Lapai                            |
| 2956 | NG/0203 | Health Post, Gbage                      | Lapai                            |
| 2957 | NG/0205 | Health Post, Kpada                      | Lapai                            |
| 2958 | NG/0206 | Health Post, Sokun                      | Lapai                            |
| 2959 | NG/0207 | Health Clinic, Ebbo                     | Lapai                            |
| 2960 | NG/0208 | Health Post, Bazhi                      | Lapai                            |
| 2961 | NG/0209 | Baka Health Post, Baka                  | Lapai                            |
| 2962 | NG/0210 | Comprehensive Health Centre, Lapai      | Lapai                            |
| 2963 | NG/0211 | Basic Health Centre, Agwara             | Opposite LGA Secretariat, Agwara |
| 2964 | NG/0212 | Maternal & Child Health Clinic, Agwara  | Agwara                           |
| 2965 | NG/0213 | Health Centre, Papiri Gajere            | Papiri Gajere Village            |
| 2966 | NG/0214 | Kwana Dispensary                        | Agwara                           |
| 2967 | NG/0215 | Papiri Dispensary                       | Papiri                           |
| 2968 | NG/0216 | Health Post, Kokolo                     | Kokolo Town                      |
| 2969 | NG/0217 | Basic Health Centre Rofia               | Rofia Village                    |
| 2970 | NG/0218 | Mission Dispensary, Agwara              | Agwara                           |
| 2971 | NG/0219 | Gallah Dispensary, Gallah               | Gallah Town                      |
| 2972 | NG/0220 | Kamala Dispensary                       | Kamala                           |
| 2973 | NG/0221 | Zabo Health Clinic, Zabo                | Lapai                            |
| 2974 | NG/0222 | Model Primary Health Care Centre, Shaku | Lapai                            |
| 2975 | NG/0223 | Health Clinic, Saminaka                 | Lapai                            |
| 2976 | NG/0224 | Maternal & Child Health Clinic, Lapai   | Lapai                            |
| 2977 | NG/0225 | Town Dispensary                         | Gaba/Kudu                        |
| 2978 | NG/0228 | Health Post, Takalafiya                 | Lapai                            |
| 2979 | NG/0229 | Dangana Health Post                     | Lapai                            |
| 2980 | NG/0230 | Zolegi Health Post                      | Lapai                            |
| 2981 | NG/0231 | Etsugi Health Post                      | Lapai                            |
| 2982 | NG/0232 | Zwafu Health Post                       | Lapai                            |
| 2983 | NG/0233 | Gabi Health Post                        | Lapai                            |
| 2984 | NG/0234 | Gbacidan Health Post                    | Lapai                            |
| 2985 | NG/0235 | Shaku Kuku Model Health Clinic          | Shaku                            |

|      |         |                                                       |                                                                                                      |
|------|---------|-------------------------------------------------------|------------------------------------------------------------------------------------------------------|
| 2986 | NG/0236 | Dapugi Health Post                                    | Dapugi                                                                                               |
| 2987 | NG/0237 | Mayaki Health Clinic                                  | Mayaki Village                                                                                       |
| 2988 | NG/0238 | Kpashimi Health Clinic                                | Kpashimi Village                                                                                     |
| 2989 | NG/0239 | Zabbo Health Post                                     | Zabbo Village                                                                                        |
| 2990 | NG/0240 | Eddo Health Post                                      | Eddo Village                                                                                         |
| 2991 | NG/0241 | Evitu Health Post                                     | Evitu Village                                                                                        |
| 2992 | NG/0242 | Ekkkan Health Post                                    | Ekkkan Village                                                                                       |
| 2993 | NG/0243 | Tunga Magaji Health Centre                            | Agwara                                                                                               |
| 2994 | NG/0244 | Tunga Kade Health Centre                              | Agwara                                                                                               |
| 2995 | NG/0245 | Hikiyan Health Centre                                 | Agwara                                                                                               |
| 2996 | NG/0246 | Muhatu Health Clinic                                  | Agwara                                                                                               |
| 2997 | NG/0247 | Adahe Health Centre                                   | Agwara                                                                                               |
| 2998 | NG/0248 | Mago Health Centre                                    | Agwara                                                                                               |
| 2999 | NG/0249 | Zuma Barracks MRS                                     | Suleja                                                                                               |
| 3000 | NG/0252 | Spring Valley Hospital                                | Behind Sarafina along White Dove School/Redeemed Church, adjacent Supreme School Suleja, Niger State |
| 3001 | NG/0253 | Federal College of Wildlife Management Medical Centre | Federal College of Wildlife Management, New Bussa, Niger State.                                      |
| 3002 | NG/0255 | Basic Health Clinic, Agwara                           | Agwara, Niger State                                                                                  |
| 3003 | NG/0256 | St. John the Baptist dispensary and PHC Papiri        | Papiri, Niger State                                                                                  |
| 3004 | NG/0257 | New Bethel Hospital & Maternity                       | Bosso Low Cost Senior Staff Qtrs                                                                     |
| 3005 | NG/0258 | 31 AB MC Cantonment                                   | Military Cantonment, Minna, Niger State                                                              |
| 3006 | NG/0259 | Hope Clinic & Maternity                               | Along Gofanti Road, Wawa, Minna, Niger State                                                         |
| 3007 | NG/0260 | Rainbow Clinic & Maternity                            | IBB University Road, P.O.Box 87 Lapai, Niger State                                                   |
| 3008 | NG/0261 | Kontagora Clinic                                      | Lagos-Kano Road, Kontagora                                                                           |
| 3009 | NG/0263 | Shehu Aliyu Usman Shagari General Hospital            | Nasko, Niger State                                                                                   |
| 3010 | NG/0264 | Olive Goodnews Clinic and Maternity (OGCM)            | 4TH ECWA Church Road, Sauka-Kahuta, Minna, Niger State                                               |
| 3011 | NG/0265 | Abdulsalam Abubakar General Hospital                  | Gulu, Niger State                                                                                    |
| 3012 | NG/0266 | King Salem Hospital & Maternity                       | No. 3 Fasuwm Street, PDP Qtrs, Behind ABS Guest Inn, Suleja, Niger State                             |
| 3013 | NG/0267 | Yetu Hospital                                         | Zungeru Road, Lemu, Niger State                                                                      |
| 3014 | NG/0268 | Lafia Medics & Clinics                                | Alhaji Bokani Shopping Complex BCGA, Kontagora, Niger State                                          |
| 3015 | NG/0269 | Divine Mercy Hospital and Maternity                   | Dutsen Kura Gwari-Minna, Niger State                                                                 |
| 3016 | NG/0270 | Adalchi Clinics & Maternity                           | 2,Jantaboway, Lapai, Niger State                                                                     |
| 3017 | NG/0271 | Umaru Musa Yar Adua Memorial Hospital                 | Abuja-Kaduna Road, Sabon Wuse, Niger State                                                           |
| 3018 | NG/0272 | Bazza Jasim Clinic                                    |                                                                                                      |

|      |         |                                                        |                                                                                              |
|------|---------|--------------------------------------------------------|----------------------------------------------------------------------------------------------|
| 3019 | NG/0273 | National Institute for Fresh Water Fisheries Research  | New Bussa, Niger State                                                                       |
| 3020 | NG/0274 | Sallam Hospital and Maternity                          | No. 10 Justus Sadiq, Angwan Magaji Road, Suleja, Niger State                                 |
| 3021 | NG/0275 | Teekay Hospital                                        | 5, Musa Kwajafa Street, off Yaro College Road, Suleja, Niger State                           |
| 3022 | NG/0277 | Police Secondary School Clinic                         | Police Secondary School, Shano, Minna, Niger State                                           |
| 3023 | NG/0278 | Garkiya Children Specialist Clinic, Minna, Niger State | Bosso, Minna Niger State                                                                     |
| 3024 | NG/0279 | Zuma Total Care Hospital                               | Suleja, Niger State                                                                          |
| 3025 | NG/0281 | Charles Health Care Limited                            | No 2, Aliyu Sardauna Street, Between Old NTA Office And Union Bank PLC, Suleja, Niger State. |
| 3026 | NG/0282 | Holy Ghost Dominion Healing Hospital.                  | No. 1, Peace Avenue, Paulosa Suleja, Niger State                                             |
| 3027 | NG/0283 | Berith Specialist Hospital                             | Plot 16087, Minna Road, Kwamba Layout, Suleja, Niger State.                                  |
| 3028 | NG/0284 | Faejoc Rapha Clinic LTD                                | Karfe Town, Old Bwari Road, Behind Zuma Barrack, Suleja Niger State                          |
| 3029 | NG/0287 | Optimal Family Medical Center                          | 3, Jubilee Road, Suleja Niger State.                                                         |
| 3030 | NG/0288 | Yetu Specialist Hospital.                              | Yetu Specialist Hospital.                                                                    |
| 3031 | NW/0001 | May Day Specialist Hospital & Maternity                | Esu Karu Road, opp Skye Bank Mararaba                                                        |
| 3032 | NW/0003 | Federal Medical Centre, keffi                          | Keffi                                                                                        |
| 3033 | NW/0004 | Adonai Hospital                                        | 2, Adonai Close Off Old Karu Road, Mararaba                                                  |
| 3034 | NW/0005 | Blessed Trinity Hospital Ltd.                          | 5, Criss Park Street, Mararaba                                                               |
| 3035 | NW/0006 | General Hospital, Keffi                                | Keffi                                                                                        |
| 3036 | NW/0007 | Henad Medical Centre                                   | Dogo Road                                                                                    |
| 3037 | NW/0008 | General Hospital, Uke                                  | Uke                                                                                          |
| 3038 | NW/0009 | General Hospital, Akwanga                              | Akwanga                                                                                      |
| 3039 | NW/0010 | E.R.C.C. Medical Centre                                | Keffi Road Akwanga                                                                           |
| 3040 | NW/0011 | General Hospital, Nasarawa Eggon                       | Nasarawa Eggon                                                                               |
| 3041 | NW/0012 | General Hospital, Keana                                | Keana                                                                                        |
| 3042 | NW/0013 | General Hospital, Awe                                  | Awe, Nasarawa State                                                                          |
| 3043 | NW/0014 | General Hospital, Obi                                  | Obi, Nasarawa State                                                                          |
| 3044 | NW/0015 | General Hospital, Wamba                                | Wamba, Nasarawa State                                                                        |
| 3045 | NW/0016 | Dalhatu Araf (Specialist Hospital)                     | Nasarawa                                                                                     |
| 3046 | NW/0017 | Kowa Hospital                                          | Jos Road, Lafia, Nasarawa State                                                              |
| 3047 | NW/0018 | Sauki Hospital                                         | Jos Road, Lafia, Nasarawa State                                                              |
| 3048 | NW/0047 | His Mercy Hospital                                     | Aso Rd., By NEPA Transformer, Mararaba                                                       |
| 3049 | NW/0048 | Karu Hospitals Limited                                 | Behind Building Material Market, Mararaba                                                    |
| 3050 | NW/0050 | Nagari Allah Magani Clinic & Maternity                 | Behind Chief Magistrate Court, Keffi.                                                        |



|      |         |                                          |                                                                                      |
|------|---------|------------------------------------------|--------------------------------------------------------------------------------------|
| 3051 | NW/0051 | 177 Bn MRS Keffi                         | Keffi                                                                                |
| 3052 | NW/0052 | Maraba Guruku Medical Center             | Mararaba Int. Mkt Mararaba                                                           |
| 3053 | NW/0054 | Alpha Hospital                           | 36 Makama Dogo Rd Nassara Tooto                                                      |
| 3054 | NW/0055 | Nissi Clinic & Maternity                 | Area 1 Masaka Near Balami Filling Station, Nasarawa State                            |
| 3055 | NW/0065 | St. Anthony's Clinic                     | 13th Elisha Darehovt Street Opp., Midland Plaza,                                     |
| 3056 | NW/0066 | DSS Clinic                               | Lafia Nasarawa State                                                                 |
| 3057 | NW/0067 | General Hospital, Toto                   | Toto, Nasarawa State                                                                 |
| 3058 | NW/0068 | General Hospital, Garaku                 | Nasarawa State                                                                       |
| 3059 | NW/0069 | General Hospital, Nasarawa               | Nasarawa State                                                                       |
| 3060 | NW/0070 | Fed. Polytechnic Nasarawa Medical Centre | Nasarawa, Nasarawa State                                                             |
| 3061 | NW/0071 | SHUKURA MEDICAL CENTER                   | OPP KOFAR HOUSE, HAUSA PRY. SCH. KEFFI                                               |
| 3062 | NW/0073 | ROYAL HOSPITAL                           | KEFFI-ABUJA ROAD, BEHIND GWAZA HOTEL, AKWANGA                                        |
| 3063 | NW/0074 | OUR LADY OF APOSTLES HOSPITAL            | OLA HOSPITAL, AKWANGA                                                                |
| 3064 | NW/0076 | MISAN CLINIC AND MAT.                    | ADO, KARU                                                                            |
| 3065 | NW/0077 | M&D HOSPITAL                             | PLOT 6565 JOS ROAD, LAFIA                                                            |
| 3066 | NW/0080 | DEHI HOSPITAL AND MAT.                   | 49, UNGWA MAKAMA-DOGO ROAD,NASSARAWA                                                 |
| 3067 | NW/0085 | Kings Care Hospital                      | Kings Care Close Mararaba                                                            |
| 3068 | NW/0090 | New Metro Clinic & Maternity             | 20 Dr Kash Street, Behind St John Catholic, Mararaba                                 |
| 3069 | NW/0092 | Fountainhead Medical Centre              | 22 Jos Road, NIPDC Estate, Off Abacha Road Mararaba                                  |
| 3070 | NW/0093 | Nasarawa State University Health Centre  | Keffi                                                                                |
| 3071 | NW/0095 | Police Clinic                            | Nasarawa                                                                             |
| 3072 | NW/0097 | Nasarawa Medical Centre                  | Along Toto-Abaji Road Nasarawa                                                       |
| 3073 | NW/0098 | Livia Shammah Hospitals Limited          | Opp. MRS Filling Station, beside Zimara Int. School, Abuja-Keffi Exp, Road Mararaba. |
| 3074 | NW/0102 | Total Care Hospital                      | 35, Abacha Rd, Mararaba, Nasarawa State                                              |
| 3075 | NW/0104 | Pijag Clinic & Maternity                 | No 17, Base 2, Aku Village, Mararaba, Nasarawa State.                                |
| 3076 | NW/0105 | Vicar Clinic                             | Near Deeper Life, Kabayi Mararaba, Nasarawa State                                    |
| 3077 | NW/0106 | Kyari Lafiya Clinic & Maternity Ltd      | No 10, Philip Dada Street, One Man Village, Nasarawa State.                          |
| 3078 | NW/0107 | General Hospital Doma                    | Agbashi Road, Doma, Nasarawa State.                                                  |
| 3079 | NW/0109 | Alkawari Hospital & Maternity Ltd        | Km 18 Keffi Express Way, Nyanya Gwandara, Nasarawa State.                            |
| 3080 | NW/0112 | Graceland Specialist Hospital            | Kuchikau 1, Harafoam Street, Kuchikau, Nasarawa State.                               |
| 3081 | NW/0113 | Masaka Central Hospital                  | 100 royal college road, immediately after royal college, Masaka, Nasarawa State.     |

|      |         |                                     |                                                                                             |
|------|---------|-------------------------------------|---------------------------------------------------------------------------------------------|
| 3082 | NW/0114 | Ettal Clinic & Maternity            | Behind Alafam Filling Station by Primary Healthcare, Masaka, Nasarawa State.                |
| 3083 | NW/0115 | Tafa Clinic & Maternity             | No 46, Old Karu Road, Mararaba, Nasarawa State                                              |
| 3084 | NW/0116 | Olivet Medical Center               | Behind Police Barracks, National Supply, Lafia, Nasarawa State                              |
| 3085 | NW/0118 | Agu Hospital                        | Jos Road, Opp Skye Bank, Lafia, Nasarawa State.                                             |
| 3086 | NW/0119 | Edither Choice Hospital             | 1 Mohammed Mana Street Off Abacha Road,                                                     |
| 3087 | NW/0120 | Diamond Clinic & Maternity          | No.4 Tudun Gwandara Opposite Emmanuel Baptist Church Lafia Nasarawa State                   |
| 3088 | NW/0121 | Oshyeg'Ba Josh Medical Centre Lafia | Behind Ministry Of Justice, Off Shendam Road, Lafia Nasarawa State                          |
| 3089 | NW/0122 | Al-Nur Clinic & Maternity Home      | Al-Nur Clinic & Maternity Home                                                              |
| 3090 | NW/0123 | Anointed Clinic & Maternity         | Behind Abdul Abdul Filling Station, By Ronkus International School, Mararaba Nasarawa State |
| 3091 | NW/0124 | Bold Step Clinic & Maternity        | Behind RCCG Rafin Kwara, Masaka. Nasarawa State                                             |
| 3092 | NW/0125 | Shabu-Crystal Health Hospital       | Akurba Road, Shabu Lafia North Nasarawa State                                               |
| 3093 | NW/0126 | Neman Clinic & Maternity            | Kagbaru Road, Before Capital Gate Way Hotel Ado .Nasarawa State                             |
| 3094 | NW/0128 | Oshyeg'Ba Josh Medical Centre Lafia | Behind Ministry Of Justice, Off Shendam Road, Lafia Nasarawa State                          |
| 3095 | NW/0129 | Al-Nur Clinic & Maternity Home      | Tudun Wada Keffi, Nasarawa State                                                            |
| 3096 | NW/0135 | Rayyan Hospital                     | Adjacent Keffi L.G.A. Nasarawa State                                                        |
| 3097 | NW/0136 | San Health Project Lafia East       | Newtaal Road Along Lafia East Primary School Lafia                                          |
| 3098 | OD/0001 | State Specialist Hospital, Ikare    | Ikare Akoko                                                                                 |
| 3099 | OD/0002 | Terebo Omowetan Hospital            | Beside Muslim Primary School Ese Quarters, Ikare Akoko                                      |
| 3100 | OD/0004 | Epinmi Basic Health Centre          | Epinmi, Ondo State                                                                          |
| 3101 | OD/0005 | Sijuwade Specialist Hospital        | 10, SIJUWADE BAA-SEGUN RD, AKURE                                                            |
| 3102 | OD/0006 | St. David's Hospital                | OBA ADESIDA RD. AKURE                                                                       |
| 3103 | OD/0007 | St. John & Mary Hospital            | 2 Adebayo Onilane Isikan Allase Akure                                                       |
| 3104 | OD/0008 | Ade-Tade Hospital                   | 5-7 Ade-Tade Str. Illesa Garrage, P.O.Box 3200, Akure                                       |
| 3105 | OD/0009 | Joe-Jane Medicine Centre            | Okejebu Rd. Akure                                                                           |
| 3106 | OD/0010 | Abitoye Hospital                    | 101, Ijoka Road, Akure                                                                      |

|      |         |                                                |                                                           |
|------|---------|------------------------------------------------|-----------------------------------------------------------|
| 3107 | OD/0011 | State Specialist Hospital, Akure               | Akure                                                     |
| 3108 | OD/0015 | State Specialist Hospital, Okitipupa           | Okitipupa                                                 |
| 3109 | OD/0018 | Federal Medical Centre - Owo                   | Owo                                                       |
| 3110 | OD/0021 | State Specialist Hospital, Ondo                | Ondo                                                      |
| 3111 | OD/0022 | Oludare Hospital                               | Fanibi Layout, Akure                                      |
| 3112 | OD/0045 | Adeyemi College Of Education Health Centre     | Ondo State                                                |
| 3113 | OD/0049 | 323 AR MRS, Akure                              | Akure, Ondo State                                         |
| 3114 | OD/0050 | Sick bay                                       | FOB Igbokoda, Ondo State                                  |
| 3115 | OD/0052 | Liberty Hospital & Maternity                   | Oluwatunyi Quarters off Ijoko Road ,Akure                 |
| 3116 | OD/0053 | First Mercy Specialist Hospital                | 19c Gbogi street, off Osa Adesida Road, Akure             |
| 3117 | OD/0054 | MOMAAK Specialist Hospital                     | 3 Lafe Inn way, Okuta Eleri                               |
| 3118 | OD/0055 | J & E Fatunla Hospital                         | 11/13 Arisoyin layout Oke Arotitun (By IBIPRESS), Akure   |
| 3119 | OD/0056 | Christ Hospital                                | 5 Adeyemi College Road, Ondo                              |
| 3120 | OD/0057 | City Specialist Hospital                       | 56 Oke Arata street, Igbo-Oliki, Akure, Ondo State        |
| 3121 | OD/0058 | Adedewe Okunriboye Hospital                    | Opposite Celestial Church, Ondo Road Bye pass, Akure      |
| 3122 | OD/0059 | Adelabu Hospital & Maternity Home              | 106 Sobe Road Ifon                                        |
| 3123 | OD/0060 | Anthony Adeleke Memorial Hospital              | Okitipupa L. G. A, Ondo                                   |
| 3124 | OD/0061 | Laju Hospital                                  | Road 7 Fumbi Fagun crescent, Ondo                         |
| 3125 | OD/0062 | Ogunsusi Memorial Hospital                     | 1 Zion Estate, Ile-oluji                                  |
| 3126 | OD/0063 | Emmanuel Clinic                                | 2 Towobola street, Akinjagunla                            |
| 3127 | OD/0064 | Fujah Specialist Hospital                      | 22, Adetutu Street, Opp. Isikan Market, Akure, Ondo State |
| 3128 | OD/0073 | DSS Clinic                                     | Akure, Ondo State                                         |
| 3129 | OD/0074 | Police Clinics, Ondo                           | Ondo State                                                |
| 3130 | OD/0075 | Police Children School Clinic, Ondo            | Ondo State                                                |
| 3131 | OD/0076 | Federal University of Technology Health Centre | Akure, Ondo State                                         |
| 3132 | OD/0078 | MIRACLE HOSPITAL                               | 17A IWEALEWA STREET, AKURE                                |
| 3133 | OD/0081 | BABALOLA NINEWELLS SPEC. HOSPITAL              | 46, ABITOYE STREET, OSHOKOTI LAYOUT, AKURE                |
| 3134 | OD/0082 | ARIF MEDICAL CENTER                            | BEHIND SABO MAIN MARKET ORE                               |
| 3135 | OD/0083 | SHEKINAH HOSPITALS                             | BEHIND OLD OWO GARAGE, OFF EL-SHADDAI RD. AKURE           |
| 3136 | OD/0084 | OKE ROYAL HOSPITAL                             | CJO-8, OLORUNSHOGO STREET, IKARE-AKOKO                    |
| 3137 | OD/0085 | AJIBOYE HOSPITAL                               | 78, ADEMULEGU ROAD, ONDO                                  |
| 3138 | OD/0086 | INLAND MEDICAL CENTER                          | 2, OLANIPEKUN LANE, BEHIND GEN. HOSPITAL, IKARE-AKOKO     |
| 3139 | OD/0087 | ROTSAM CLINIC                                  | FUTA AREA, AKURE                                          |
| 3140 | OD/0088 | BABALOLA MEDICAL CENTER                        | 21, HOSPITAL RD, ONDO TOWN                                |
| 3141 | OD/0101 | 19 BN MRS, Okitipupa                           | Okitipupa                                                 |
| 3142 | OD/0103 | Ndubuisi Hospital & Maternity                  | Epetimehin Close, Off Brig Ademulegun Road, Ondo          |

|      |         |                                                              |                                                                        |
|------|---------|--------------------------------------------------------------|------------------------------------------------------------------------|
| 3143 | OD/0104 | Wole Ayo Hospital Ltd                                        | 4 Olorunsogo Street off Brigadier Ademulegun Road, Ondo                |
| 3144 | OD/0105 | Kharis Medical Centre                                        | 2 Ondo Bye-Pass JUT, Oyeme Road                                        |
| 3145 | OD/0108 | Sckye Hospital Ltd                                           | 83B Oba Adesida Road, Akure                                            |
| 3146 | OD/0109 | Gloryfield Hospital                                          | Ondo Road, Ore                                                         |
| 3147 | OD/0113 | General Hospital, Ile Oluji                                  | Ile Oluji, Ondo State                                                  |
| 3148 | OD/0114 | General Hospital                                             | Opp Anglican Grammar School, Oke-Ogbe, Iju-Itaogbolu, Ondo State       |
| 3149 | OD/0115 | Olatunde Medical Centre                                      | Adelae Crescent, off Agunloye Street, Ondo Rd, Akure                   |
| 3150 | OD/0116 | Simion Medical Centre                                        | 22, Lafa way, off Ilesa rd, Akure, Ondo State                          |
| 3151 | OD/0118 | General Hospital Igbokoda                                    | Omomira Street, Igbokoda                                               |
| 3152 | OD/0119 | National Institute for Educational Planning & Admin Health C | KLM 4, Laje Road, Ondo                                                 |
| 3153 | OD/0120 | Opeyemi Medical Clinics Limited                              | Sagamu-Benin Express Way, Opp Ade Super Petroleum Ore                  |
| 3154 | OD/0121 | Obanoyen Clinic Hospital                                     | 53, Irugbe street, Ijebu Owo, Ondo state                               |
| 3155 | OD/0122 | Hopeland Specialist Medical Center                           | 1, Arikawe Street, Akure, Ondo state                                   |
| 3156 | OD/0123 | The Catholic Hospital                                        | Off Adeyemi college of Education rd, Oke-odunwo, Ondo                  |
| 3157 | OD/0124 | Omololu Hospital                                             | 2, Akinjo Street, Oshokoti Layout, Oke-Ijebu, Akure                    |
| 3158 | OD/0125 | St Louis Catholic Hospital                                   | Owo Hospital Rd, Oke Ogun area, Owo, Ondo State                        |
| 3159 | OD/0126 | Rainbow Medical center                                       | 9, Joy street, Ore, Ondo State                                         |
| 3160 | OD/0127 | Victory Specialist Hospital                                  | 4, Victory Street, Ibitayo Estate, Ondo                                |
| 3161 | OD/0128 | Ibukun Olu Ayo Hospital                                      | Off Ikoya Rd, Maryland Hotel, Okitipupa, Ondo                          |
| 3162 | OD/0129 | Akintan Memorila Hospital                                    | L/016A, Owolabo, Street, Ikare, Akoko, Ondo                            |
| 3163 | OD/0130 | Ola Jesu Medical Clinic                                      | King Emmanuel Rd, Ore, Ondo                                            |
| 3164 | OD/0131 | Owoyemi Specialist Hospital                                  | 5, Oshinle road, Akure-ondo, Olu Kayode roundabout, Akure, Ondo State. |
| 3165 | OD/0132 | Joladet Clinic                                               | 9, Araromi Street, Owo, Ondo State.                                    |
| 3166 | OD/0133 | Dec Medical Clinic                                           | No 4, Grace Ibitola Street, Ore, Ondo State.                           |
| 3167 | OD/0134 | Mercy Land Medical Center                                    | 177, Ondo-Ore road, Ondo                                               |
| 3168 | OD/0135 | Rufus Giwa Polytechnic Health Center                         | Rufus Giwa Polytechnic Health Center                                   |
| 3169 | OD/0143 | Elizade University Medical Centre                            | Wuraola Adejojo Avenue, Ilara Mokin Ondo State                         |

|      |         |                                                   |                                                            |
|------|---------|---------------------------------------------------|------------------------------------------------------------|
| 3170 | OD/0144 | Police Clinic                                     | Owo Area Command Ijebu Owo Ondo State                      |
| 3171 | OD/0145 | Police Clinic                                     | Yaba Ondo                                                  |
| 3172 | OD/0146 | Hope Hospital & Maternity                         | 5, Owa Palace Road, Odode Idanre Ondo State                |
| 3173 | OD/0147 | New Day Clinic & Maternity                        | Opp. OSRC Gate Ijare Road, Akure Ondo State                |
| 3174 | OD/0149 | Goshenland Specialist Hospital & Fertility Centre | Block A. Plot 35 Aaye Community Oda Road. Akure Ondo State |
| 3175 | OD/0150 | Midas Clinic                                      | 65,Oke-Ijebu Street Akure Ondo State                       |
| 3176 | OD/0151 | Paramount Specialist Hospital & Fertility Centre  | 22 Sydney Emmanuel Crescent, Valentino Street, Ondo State  |
| 3177 | OD/0154 | Mao Hospital Limited                              | 13, Gbangbalogun Street, Akure Ondo State                  |
| 3178 | OD/0155 | Kaymas Medical Centre                             | Newtown, Oke-Aro, Akure Ondo State                         |
| 3179 | OD/0156 | Miteda Specialist Hospital                        | Plot 5,Laoye Adegoke Road, Alagbaka, Akure Ondo State      |
| 3180 | OD/0157 | Blue Print Specialist Clinic                      | 3, Falodun Avenue Oke-Ogun, Owo Ondo State                 |
| 3181 | OD/0158 | Pima Hospital & Maternity                         | Off Okitipupa Road, Ore Ondo State                         |
| 3182 | OG/0001 | Federal Medical Centre, Abeokuta                  | Bisi Onabanjo Way, Idi-Aba, Abeokuta, Ogun State           |
| 3183 | OG/0002 | Mercy Group Clinics                               | Back Of Uba Building Pansheke, Ibara, Abeokuta             |
| 3184 | OG/0004 | Femtob Specialist Hospital                        | No. 5 Obileye Street, Gra, Ijebu-Ode                       |
| 3185 | OG/0005 | Egba Medical Centre                               | Ishabu, Abeokuta                                           |
| 3186 | OG/0006 | Oba Ademola Maternity Hospital                    | Ijemo, Abeokuta                                            |
| 3187 | OG/0007 | Neuropsychiatric Hospital                         | Aro, Abeokuta, Ogun State                                  |
| 3188 | OG/0009 | Kingsmith Hospital & Maternity                    | 12 Ojodu Road, Akute, Ogun State                           |
| 3189 | OG/0026 | State Hospital, Ijebu-Ode                         | Ijebu-Ode                                                  |
| 3190 | OG/0027 | State Hospital, Abeokuta                          | Abeokuta, Ogun State                                       |
| 3191 | OG/0031 | Hetta Medical Centre                              | 15, Martina Road, Sango, Ota                               |
| 3192 | OG/0032 | Larion Medical Centre                             | 8, Laz Ukwuoma Close, Morogbo Agbara, Lagos.               |
| 3193 | OG/0034 | Rophe Medical Centre                              | 23, Anambra Crescent, Agbara Estate, Ogun State.           |
| 3194 | OG/0036 | Medicare Clinic                                   | 105, Idi-Iroko Road, Otta, Ogun State.                     |
| 3195 | OG/0039 | 35 AB MC Abeokuta                                 | Abeokuta, Ogun State                                       |
| 3196 | OG/0040 | 321 AR MRS, Abeokuta                              | Abeokuta, Ogun State                                       |
| 3197 | OG/0041 | 12 FER MRS, Ijebu-Ode                             | Ijebu-Ode, Ogun State                                      |
| 3198 | OG/0042 | ESR MRS Owode                                     | Ogun, Ogun State                                           |
| 3199 | OG/0043 | 192 Bn MRS Owode                                  | Owode, Ogun State                                          |
| 3200 | OG/0044 | Sick Post Music School                            | Otta, Ogun State                                           |
| 3201 | OG/0045 | Sick bay NNSS, Abeokuta                           | Abeokuta, Ogun State                                       |

|      |         |                                                     |                                                            |
|------|---------|-----------------------------------------------------|------------------------------------------------------------|
| 3202 | OG/0047 | Olutunu Clinics                                     | Agosa, Idiroko                                             |
| 3203 | OG/0048 | Tobiloba Clinic & Maternity                         | 1 Tobiloba Way off Kuforiji-olubi Estate, Adigbe, Abeokuta |
| 3204 | OG/0049 | Headstone Medical Centre                            | 103 Idiroko Road, Owode Yewa                               |
| 3205 | OG/0050 | Adura Majekodunmi Hospital                          | Akomoje Iberekodo Abeokuta                                 |
| 3206 | OG/0051 | Fame Medical Centre                                 | No 48 joju Rd Sango Ota                                    |
| 3207 | OG/0052 | Mayowa Integrated Medical Services Ltd, Idi-Iroko   | 1, ALAWODE WAY, IDI-IROKO                                  |
| 3208 | OG/0053 | Central Specialist Hospital                         | 133 Idiroko Rd Ota                                         |
| 3209 | OG/0054 | Bomi Clinics                                        | No 5 Ibi Kunle Str Sango Ota                               |
| 3210 | OG/0055 | Twins Specialist Clinic                             | 2 Gate GRA Ota                                             |
| 3211 | OG/0056 | Hassan Medical Hospital                             | 2 Baale Str Iloye Sango Ota                                |
| 3212 | OG/0057 | Ayotola Specialist Hospital                         | 3 Suraju Odunuga Street, Off Baruwa Str, Sagamu            |
| 3213 | OG/0058 | Victoria Memorial Hospital                          | Morogbo Agbara                                             |
| 3214 | OG/0059 | Lafiya Medical Center                               | No 6 Olanode Street Ayetoro Garage, Abeokuta               |
| 3215 | OG/0060 | Soremekun Memorial Hospital                         | 127 Lagos-Abeokuta Rd, Vespa B/Stop, Ifo                   |
| 3216 | OG/0061 | Agboola Hospital Ltd                                | 19 Olori Rd Baale Aknosi Town, Ajuwon Iju                  |
| 3217 | OG/0062 | Agbara Medical centre                               | 1B Adigbogbo Str Jide, Agbara                              |
| 3218 | OG/0063 | Alpha Clinic                                        | 3 Catholic Church Str., Ajegunle Olororo Aiyegbami, Sagamu |
| 3219 | OG/0064 | Comprehensive Medical Centre                        | 12 Lisabi Elite Road Idi-Aba                               |
| 3220 | OG/0065 | Owokoniran Memorial Hospital                        | 3 Owokoniran Street, Makun Station, Sagamu                 |
| 3221 | OG/0066 | Federal College Of Education Health Centre Abeokuta | Abeokuta                                                   |
| 3222 | OG/0067 | Bisoyegboye Medical Centre                          | No 1B Taiwo Str, Makun, Sagamu                             |
| 3223 | OG/0068 | Lanik Medical Centre                                | No 5 Imoru Str Ijebu-Ode                                   |
| 3224 | OG/0069 | Naval Sick Bay                                      | Abeokuta                                                   |
| 3225 | OG/0070 | Itunu Hospital                                      | 48 Tinubu Street Itezko Abeokuta                           |
| 3226 | OG/0072 | Akin-Olugbade Hospital                              | 16 Iyalode Street Abeokuta                                 |
| 3227 | OG/0073 | Faramed Clinics                                     | 37 Akinwunmi Street Joji Rd. Ota                           |
| 3228 | OG/0074 | Krownfit Medical Centre                             | Km 7 Idiroko Road Sango ,Ota                               |
| 3229 | OG/0075 | Ariset Medical Centre and Ventures Ltd              | 6 Akunleyon Street Ota                                     |
| 3230 | OG/0076 | Rubee Medical Centre Ltd                            | Km 38 Abeokuta Motor Road, Sango, Ota                      |
| 3231 | OG/0077 | Oluwalogbon Medical Center                          | Ifelodun Qtrs. Atan Ota                                    |
| 3232 | OG/0078 | Mulib Hospital                                      | 57 Ijoko Motor Road, Sango Ota                             |
| 3233 | OG/0079 | First Line Clinics Hospital and Maternity           | Km 2 Idiroko Rd Ota                                        |
| 3234 | OG/0080 | Ibukun Clinics                                      | 1 Agunloye Street, Otta                                    |
| 3235 | OG/0081 | Kolade Specialist Hospital                          | 68 Idiroko Road, Sango Ota                                 |
| 3236 | OG/0082 | Ota Specialist Hospital Ltd                         | 67 Idiroko Road, Ota                                       |
| 3237 | OG/0102 | DSS Clinic                                          | Abeokuta, Ogun State                                       |
| 3238 | OG/0103 | Police Clinics, Abeokuta                            | Eleweran                                                   |
| 3239 | OG/0104 | Federal Polytechnic Medical Centre                  | Ilaro, Ogun State                                          |

|      |         |                                                       |                                                                                  |
|------|---------|-------------------------------------------------------|----------------------------------------------------------------------------------|
| 3240 | OG/0105 | University of Agric. Health Centre , Abeokuta         | Abeokuta, Ogun State                                                             |
| 3241 | OG/0107 | Diamond Cross Med. Centre                             | 36 Okejigbo Rd, Iporo Ake, Ogun State                                            |
| 3242 | OG/0109 | Gbekelolu Medical Centre                              | 3 Gbeke Opalami Street, Makun Sagamu, Ogun State                                 |
| 3243 | OG/0110 | Holy Cross Hospital                                   | Ijaye Oja Aro Abeokuta, Ogun State                                               |
| 3244 | OG/0111 | Jesus is Love & Power Hospital                        | St. Mary''s Catholic Church Area Alaja, Ifo                                      |
| 3245 | OG/0112 | Medytop Specialist Clinic                             | 3 Ejimo Alebiosu Str, Isale Ijagba Sagamu                                        |
| 3246 | OG/0113 | New Day Specialist Hospital                           | 7 Sode Street, Akarigbo Sabo Sagamu, Ogun State                                  |
| 3247 | OG/0114 | Omonayajo Health Foundation Hospital                  | 23 MKO Abiola Way Olorunsogo Oke Ola, Abeokuta, Ogun State                       |
| 3248 | OG/0115 | Ore-Ofe Clinic                                        | 88A Ejirin Rd Ijebu-Ode, Ogun State                                              |
| 3249 | OG/0116 | Sacred Heart Hospital                                 | Lantoro Abeokuta, Ogun State                                                     |
| 3250 | OG/0129 | Hossana Specialist Hospital                           | Oja Odan Road, Ilaro                                                             |
| 3251 | OG/0131 | Korede Hospital Ltd                                   | 17 Onikolobo Road, Ibara, Abeokuta                                               |
| 3252 | OG/0133 | Joseph Specialist Hospital                            | 5, Surulere Street off Lalubu Street, Oke Ilewo, Abeokuta                        |
| 3253 | OG/0136 | Overcomers Specialist Hospital                        | 1 New Koregun Street, Behind Mouka Foam, Town Planning Area, Ilishan             |
| 3254 | OG/0140 | Lead Hospital                                         | 6 Fashola Street off Pipeline Road, Behind Mountain of Fire Church, Asore-Ajuwon |
| 3255 | OG/0141 | Aladewura Clinic                                      | 33A Kuto Road, Abeokuta                                                          |
| 3256 | OG/0142 | Ore Ofe Elshaddai Clinic                              | 6 Isope Road off Ejirin Road, Texaco Junction, Ijebu Ode                         |
| 3257 | OG/0144 | Olabisi Onabanjo University Teaching Hospital Shagamu | Shagamu, Ogun State                                                              |
| 3258 | OG/0146 | Shalom Hospital & Maternity Home                      | 71 Ilugun Road, Mokola, Abeokuta                                                 |
| 3259 | OG/0149 | Adeyemi Medical Centre                                | 4 Muri Abiola Street, Agbado Station                                             |
| 3260 | OG/0151 | Anuolu Poly Clinic                                    | 25 Sokabi Street, Isara Remo                                                     |
| 3261 | OG/0152 | Lafia Kowa Specialist Hospital                        | 12 Ejirin Road, Ijebu Ode                                                        |
| 3262 | OG/0156 | Olu-Ola Specialist Hospital                           | 12B Odo-Egbo Street, Ijebu Ode                                                   |
| 3263 | OG/0158 | Akobi Specialist Hospital                             | Plot 5, Blk vw, Molipa Community layout, Ijebu-Ode                               |
| 3264 | OG/0160 | Cornerstone Hospital                                  | Beside Akute Grammar School, Akute                                               |
| 3265 | OG/0161 | Azygus Hospital & Maternity                           | 12 Adekunle Adebayo Avenue, Ilupeju Estate, Agbado                               |
| 3266 | OG/0164 | Michael & Alice Memorial Hospital                     | Plot 2, Block 31, Kemta Estate, Ajebo Road, Abeokuta                             |

|      |         |                                               |                                                                                     |
|------|---------|-----------------------------------------------|-------------------------------------------------------------------------------------|
| 3267 | OG/0165 | Bisted Medical Clinic & Maternity             | KM2 Abeokuta-Lagos Road, Beside Target Petrol Station                               |
| 3268 | OG/0166 | Shaje Hospital                                | OOUTH Annex, Quarry Road, Shaje, Abeokuta                                           |
| 3269 | OG/0167 | St Shilo Medical Centre                       | 35 Olujimi Fashola Street off Ilo Awele Road, Toll Gate, Ota                        |
| 3270 | OG/0168 | Mamre Medical Centre                          | 13 Ijoko Road, Arifanla, Akute                                                      |
| 3271 | OG/0170 | Healing Spring Medical Centre                 | 23 Ilishan Road, Iperu                                                              |
| 3272 | OG/0171 | P.R Peterson Medical Centre                   | 6 Adewale Adetokunbo Street, along NTA Road, Ijebu-Ode                              |
| 3273 | OG/0172 | Bode Medical Centre                           | 1 Odebunmi Street, Akute                                                            |
| 3274 | OG/0174 | Amazing Grace Hospital                        | 7 Iloro Street, Off New Road, Ijebu-Ode                                             |
| 3275 | OG/0176 | First Alpha Medical Centre                    | Kuforiji Olubi Drive, Adigbe, Abeokuta                                              |
| 3276 | OG/0178 | Redemption Hospital                           | Opp Deeper Life Camp, off Major Thompson, Sabo, Sagamu                              |
| 3277 | OG/0179 | Abilak Medical Centre                         | Techno B/Stop, opp Access School, Ifo                                               |
| 3278 | OG/0180 | J-Pillar Clinic and Maternity                 | 8 Iyana Iyesi Junction, Iyana Iyesi, Ota                                            |
| 3279 | OG/0181 | Beachland Specialist Hospital                 | Plot 10 Alfirmus Estate, Arepo, Off Lagos-Abeokuta Express Way                      |
| 3280 | OG/0185 | Surgicare Consult                             | Psalm 23, Oba Oluwa Road, GRA Housing Estate, Ibara, Abeokuta                       |
| 3281 | OG/0186 | O.G.M Hospital                                | #5, Adenle str, off Akute-Ijoko Rd, Ogun State                                      |
| 3282 | OG/0187 | Strong Tower Hospital                         | Oke Aro Road, Agbado                                                                |
| 3283 | OG/0188 | Babcock University Medical Centre             | Ilishan Remo                                                                        |
| 3284 | OG/0189 | Otunba Tunwase National Paediatric Centre     | Shagamu-Benin Express Way, Ijebu-Ode                                                |
| 3285 | OG/0190 | Ogunlade Hospital                             | 35 Olukokun Street, Ijebu Ode                                                       |
| 3286 | OG/0191 | Queen's Hospital                              | Poly Exp Road, Ilaro                                                                |
| 3287 | OG/0192 | Shirish Clinic                                | 102 Joju Road Otta                                                                  |
| 3288 | OG/0193 | St. Joseph Catholic Hospital                  | Oke-Agbo, Ijebu Igbo                                                                |
| 3289 | OG/0195 | Comfort Clinic and Maternity                  | 3, Ganiyu Ayinla str, off Celetial ave, Ereko qtrs, Ibafo                           |
| 3290 | OG/0196 | Chirst The Saviour Medical Centre & Maternity | 12, Pipeline rd, off Ojodu-Akute rd, Alagbole, Ogun state                           |
| 3291 | OG/0197 | Chiers Medical Centre                         | 2, Mabel Alake Adebisi Close, Off Abeokuta Sports Club road, GRA, Ibara, Ogun State |
| 3292 | OG/0199 | Goodluck Hopsital & Maternity Home Ltd        | 3, The Light Church Close, Mercy Estate, Asokore-Akute                              |
| 3293 | OG/0200 | St Albert Great Clinic                        | Most Pure Heart of Mary Catholic Church Compound, Esure, Ijebu Mushin, Ogun State   |
| 3294 | OG/0201 | First Contact Hospital and Maternity          | 33B, Kuto Road, Behind Yemi-Ola Executive Stores, Abeokuta, Ogun State              |



|      |         |                                                   |                                                                                            |
|------|---------|---------------------------------------------------|--------------------------------------------------------------------------------------------|
| 3295 | OG/0202 | Abisola Medical Center                            | 3, Akinolugbade Rd, Ita Iyalode, Abeokuta                                                  |
| 3296 | OG/0203 | Ro'ona Hospital                                   | 7, Bonojo Street, Ijebu- Ode, Ogun State.                                                  |
| 3297 | OG/0204 | Peace of God Medical Centre                       | 75, Olusegun Osoba Rd, Oke-Ilewo Street (opp Access bank) Oke Ilewo, Abeokuta, Ogun State. |
| 3298 | OG/0205 | Heritage Hospital Services                        | 102A, Opeoluwa Street, Ita Oshin, Ogun State                                               |
| 3299 | OG/0206 | Brims Hospital                                    | 4, Muraina Soyode Street, behind Olub filling station, Ayetoro road Abeokuta, Ogun State   |
| 3300 | OG/0208 | Rapha Clinic & Maternity Center                   | 42, Oguinsanya Street, Ali-Isiba Street, Sango-Ota, Ogun State                             |
| 3301 | OG/0209 | State Hospital Ota, Ogun State                    | Ota, Ogun State                                                                            |
| 3302 | OG/0210 | Kaytuns Clinics                                   | 2, Ahmed Kayode Avenue, Arinko Housing Estate Sango Otta Ogun State.                       |
| 3303 | OG/0211 | The Real Hope Hospital & Diagnostic Services LTD. | KM 3, Shagamu Road, Ita Oluwa Bus Stop, Ogijo, Ogun State                                  |
| 3304 | OG/0212 | Bliss Medical Centre                              | 1, Jolasun Street Jolasco B/Stop Akute, Ogun State.                                        |
| 3305 | OG/0213 | Twins Specialist Clinic                           | Plot 11, Gunwa Ola Street GRA Extension, Sagamu, Ogun State                                |
| 3306 | OG/0214 | Ishwot Consulting Hospital                        | 1 Janet Jibowu Street, Ita- Oshin Behind Old Nepa Office Aro Ogun State.                   |
| 3307 | OG/0215 | Samsteve Hospital                                 | 17, Ojodu Road By Mechanic B/Stop, Alagbole, Ogun State                                    |
| 3308 | OG/0216 | By- Faith Medical Center.                         | 5, Aong Oba Adeniyi Sonariwo Primary School Road, Sagamu                                   |
| 3309 | OG/0217 | Ire-Ayo Hospital Ltd.                             | Itako-Ijebu Ltd, Ogun State                                                                |
| 3310 | OG/0218 | Precious Gift Clinic & Maternity                  | 18, Adekunle Fajuyi road, Fowosedo, Abeokuta, Ogun State                                   |
| 3311 | OG/0219 | Iyaniwura Specilaist Hospital                     | I Olujobi Falana close, Behind AP filling station, Mowe town, Sagamu, Ogun state           |
| 3312 | OG/0220 | God's Hope Hospital Limited                       | 3/8, Apene Street, off Adigbe road, Adigbe, Abeokuta, Ogun State                           |
| 3313 | OG/0221 | Idera Health Services Ltd                         | Blk A Plot Araromi CTCU Ltd Estate, off old Sgamu/Abeokuta road, OgunState                 |
| 3314 | OG/0223 | Glory Medical Centre                              | 15, Nuruddeen Oshodi Street, Kwara Qtrs Ibafo.                                             |
| 3315 | OG/0224 | Toyek Clinic & Maternity                          | Off Falana Street, Mowe,                                                                   |
| 3316 | OG/0227 | Alless Trinity Hospital                           | B, Taiwo Ogundeyi Street, Bode Olude Elega, Abeokuta Ogun State                            |

|      |         |                                            |                                                                                                       |
|------|---------|--------------------------------------------|-------------------------------------------------------------------------------------------------------|
| 3317 | OG/0228 | Broadland Hospital Service                 | Gasline, Ibafo Road Magboro, Ogun State                                                               |
| 3318 | OG/0229 | Peace Han Clinic & Maternity Home          | Km 11, Idiroko Road, Opp. Winners Canaanland, Ota, by May & Baker Ogun State                          |
| 3319 | OG/0232 | Mike Medics Hospital                       | Aduba Estate, Akinbo Off Ijoko Road ,Akute Ogunn State                                                |
| 3320 | OG/0233 | St. Michael-Israel Specialist Hospital LTD | 50,Awujale Street, Itale, Ijebu-Ode Ogun State                                                        |
| 3321 | OG/0234 | Access Medical Centre                      | Behind PHCN Substation ,Ijeun Lukosi Road, Off Abiola Way, Abeokuta Ogun State                        |
| 3322 | OG/0236 | Pillars Specialist Clinic                  | 136,Akarigbo Road,Ijoku, Opp.First Bank Plc                                                           |
| 3323 | OG/0237 | Mcperson University Health Centre          | Km 96, Lagos-Ibadan Expressway,Senki-Sotayo, Village Ogun State                                       |
| 3324 | OG/0238 | Concise Health Care LTD                    | 7 Temidayo Crescent ,Off Adejumo Street ,Aro Lambo, Matogun Ogun State                                |
| 3325 | OG/0239 | De-Green pearl Hospital                    | 7A,Funsho Ogunmeyi Close, Off Igodo Road,Lagos-Ibadan Expressway Ogun State                           |
| 3326 | OG/0240 | Ojugbele Specialist Hospital               | 105,Idiroko Road, Oju-Ore Ogun State                                                                  |
| 3327 | OG/0241 | State Hospital Isara-Remo                  | Oke-Oja, Isara-Remo,Ogun State                                                                        |
| 3328 | OG/0242 | True Vine Medical Centre                   | Ogun State Housing Corporation Estate (Old Estate) Sabo-Itanrin Road,Ijebu-Ode Ogun State             |
| 3329 | OG/0244 | Jon-Fem Hospital LTD and Maternity Home    | 63, Akeja Street, Off Anglican Road, Ilo Ifako Sango-Ota, Ogun State                                  |
| 3330 | OG/0245 | Life Builders Hospital                     | 91,Igbusi Road Off Ilogbo Road, Iyana Ilogbo Bustop,Lagos-Abeokuta Expressway, Ogun State             |
| 3331 | OG/0246 | Angels & Eagle Specialist Hospital         | 9b Sikiru Jimoh Street, Beside Wemby Suites, GRA, Ibara, Abeokuta Ogun State                          |
| 3332 | OG/0247 | Patricia Memorial Hospital                 | 89,GAA Sabo Lafenwa, Abeokuta, Ogun State                                                             |
| 3333 | OG/0248 | Abundant Life Hospital Ltd                 | 1,Idahosa Street, Temidire Estate (Olopomeji Area),Off Igbodi Road, Off Adesan Road, Mowe, Ogun State |
| 3334 | OG/0250 | Joybells Hospital                          | 8,Illupeju Street, Off Jogbe Street, Ijebu-Ode Ogun State                                             |
| 3335 | OG/0251 | Odo- Esa Pry. Health Centre                | Upper Olisa Street by General Hospital, Ijebu-Ode, Ogun State                                         |

|      |         |                                               |                                                                                             |
|------|---------|-----------------------------------------------|---------------------------------------------------------------------------------------------|
| 3336 | OG/0252 | The Unique Great Shepherd Specialist Hospital | 1,Olujide Somolu Rd., Opposite Fire Service HQRS., Onikoko, Abeokuta, Ogun State            |
| 3337 | OG/0253 | Emmanuelle Medical Services                   | Idera Quarters Besides NUD Primary School, Owode Egba Ogun State                            |
| 3338 | OG/0254 | Shodes B Clinic & Maternity Home              | 61,Ishasi Road, Akute Ogun State                                                            |
| 3339 | OG/0255 | Grace Medical Enterprises Nig. Ltd            | 1,Rafatu Alake Street, Off Olusegun Osoba Road, Agbado-Crossing Ogun State                  |
| 3340 | OG/0256 | Bisayo Hospital                               | 4,Lugboro Street, Car Wash, Adatan, Abeokuta Ogun State                                     |
| 3341 | OG/0257 | Maciland Medical Centre                       | Isunba-Lafenwa Adeleye-Aparadija Rd. Ogun State                                             |
| 3342 | OG/0258 | O & A Medical Centre                          | 3, Asero Housing Estate,Asero Abeokuta. Ogun State                                          |
| 3343 | OG/0259 | 3-Tees Medical Centre                         | 10,Adebisi Street, Off Messiah Praise School,Tipper Garage, Onibudu Estate,Akute Ogun State |
| 3344 | OG/0260 | TC Specialist Hospital Ltd                    | 5,Mosunmola Ashaye Street Makun, Sagamu,Ogun State                                          |
| 3345 | OG/0261 | Bode-Olude Hospital                           | HSE 2,Plot B,Block c, Popoola Family Estate,Bode-Olude, Abeokuta Ogun State                 |
| 3346 | OG/0262 | Bells University of Technology Health Centre  | Km 8, Idiroko Road, Benja Village Ogun State                                                |
| 3347 | OG/0263 | Bliss Hospital                                | 127,Akarigbo Street,Ijoku, Sagamu,Ogun State                                                |
| 3348 | OS/0003 | Hope Medical Centre & Mat. Home               | Oyan Road, Ila-Orangun                                                                      |
| 3349 | OS/0004 | Olunife Hospital                              | Ile Ife                                                                                     |
| 3350 | OS/0009 | Olive Medical Centre                          | Ilesha                                                                                      |
| 3351 | OS/0010 | Mojisola Medical Centre                       | No.5 Bibilari Avenue,Oke-Omi Iru, Osogbo Rd, Ilesha                                         |
| 3352 | OS/0014 | Klm Muslim Hospital                           | Feesu Road, Iwo                                                                             |
| 3353 | OS/0016 | Ibukun Olu Hospital                           | Obaagun, Osogbo                                                                             |
| 3354 | OS/0018 | Biket Medical Centre                          | Off Kuyi Square, Osogbo-Ikirun Road                                                         |
| 3355 | OS/0019 | Adebare Specialist Hospital                   | Gbongan Road Osogbo                                                                         |
| 3356 | OS/0021 | Ladoke Akintola Teaching Hospital             | Osogbo                                                                                      |
| 3357 | OS/0022 | Abake Medical Centre                          | Odiolowo, Osogbo                                                                            |
| 3358 | OS/0023 | Alpha P-Hospital                              | 24/26 Ayedun Street, Osogbo                                                                 |
| 3359 | OS/0037 | Oroki Hospital                                | No. 32, Ayetoro Street, Old Ikirun Rd Osogbo                                                |
| 3360 | OS/0040 | Obafemi Awolowo Teaching Hospital             | Ile-Ife/Ilesha                                                                              |
| 3361 | OS/0041 | Adenle Memorial Hospital                      | Ilesha                                                                                      |
| 3362 | OS/0050 | Obafemi Awolowo University Health Centre      | Ile-Ife, Osun State                                                                         |
| 3363 | OS/0052 | ECC MRS, Ede, Osun State                      | ECC Mrs Ede, Osun State                                                                     |
| 3364 | OS/0053 | Onward Specialist Hospital                    | Agunbelewo Ilobu Road, Oshogbo                                                              |

|      |         |                                                   |                                                                       |
|------|---------|---------------------------------------------------|-----------------------------------------------------------------------|
| 3365 | OS/0054 | Modupe Medical Centre                             | Oke Ola Apomu, Near Ayedaade Grammar School, Ikire, Osun State        |
| 3366 | OS/0057 | DSS Clinic                                        | Osogbo, Osun State                                                    |
| 3367 | OS/0058 | Police Clinics, Osun                              | Osun State                                                            |
| 3368 | OS/0059 | Federal Polytechnic Medical Centre, Ede           | Ede North, Osun State                                                 |
| 3369 | OS/0061 | Seventh Day Adventist Hospital                    | LAGERE RD, ILE-IFE                                                    |
| 3370 | OS/0062 | Our Lady of Fatima Catholic Hospital (Jaleyemi)   | ODI-OLOWO, OSOGBO                                                     |
| 3371 | OS/0063 | TITILOPE MEDICAL CENTRE                           | 92A MORE OPP POLICE BARRACKS ILE IFE                                  |
| 3372 | OS/0065 | AL-AMEEN MEDICAL CENTRE                           | OKE-BOLA , GBONGAN                                                    |
| 3373 | OS/0066 | Ronbay Hospital & Maternity                       | TALAFIA IMAM STR, BEHIND FED. POLY EDE                                |
| 3374 | OS/0067 | Life Fountain Specialist Hospital                 | 6 OLAFARE BIOBAKU STR. PARAKIN                                        |
| 3375 | OS/0068 | St. Victoria Specialist Hospital                  | OPP NTA MOKURO RD, ILE-IFE                                            |
| 3376 | OS/0069 | GBONJUBOLA MEMORIAL HOSP.                         | 2185 CAC IGBONNA OSOGBO                                               |
| 3377 | OS/0070 | EBENEZER SPECIALIST HOSP.                         | 17 STATION RD, OSOGBO                                                 |
| 3378 | OS/0071 | BALM OF GILEAD SPEC. HOSPITAL                     | OKE-OPO GRA ILESHA                                                    |
| 3379 | OS/0072 | St. Jude's Hospital                               | OFF FATIMA COLLEGE RD, LAAKOSIN IKIRE                                 |
| 3380 | OS/0088 | Our Lady of Lourdes Catholic Hospital & Maternity | Parde Road, Ipetumodu                                                 |
| 3381 | OS/0089 | Anu Oluwa Hospital                                | Off Council Road, Isale Imole Area, Ilobu                             |
| 3382 | OS/0091 | Morning Star Medical Centre                       | 10, Oyetunde Street, Alekuwodo, Osogbo                                |
| 3383 | OS/0092 | Apex Medical Centre                               | 133 Ibadan Road, Ile Ife                                              |
| 3384 | OS/0094 | Oke-Ola Catholic Hospital                         | Oke-Ola Apomu, Isokan District                                        |
| 3385 | OS/0095 | Labab Hospital                                    | 8 Station Road, Inisha                                                |
| 3386 | OS/0096 | Bowen University Health Centre                    | Iwo                                                                   |
| 3387 | OS/0098 | Demal Clinic                                      | # 30, Kola Adetunji Street, Oke Ijetu Ilesa Garage Area, Oshogbo      |
| 3388 | OS/0099 | Living Hope Hospital                              | Parakin obalufe Layout, Osun state                                    |
| 3389 | OS/0100 | Anu-Olu Hospital and Maternity                    | 1, Alh Wahab Salami Str, Agip Area, Ede                               |
| 3390 | OS/0101 | Life care Nursing & Maternity Home                | Talafia Immam Street, Ede, Osun state.                                |
| 3391 | OS/0103 | Spring Hope Specialist Hospital                   | Spring House, Old Ikirun Road, Oshogbo, Osun State                    |
| 3392 | OS/0104 | Victory Hospital                                  | 1, Olumodan Compound, Iyalode street, Off FEESU road, Iwo, Osun State |
| 3393 | OS/0105 | Okoye-Kola Hospital                               | 20, Hospital Road, Isale Agunjin Ikirun, Osun State.                  |
| 3394 | OS/0106 | Emmanuel Medical Centre                           | 8 Deborah Oladogun Street Oshogbo                                     |

|      |         |                                                   |                                                                                  |
|------|---------|---------------------------------------------------|----------------------------------------------------------------------------------|
| 3395 | OS/0107 | Ayomide Women's Health Specialist Hospital        | 30 Powerline, Ikirun Road, Osogbo, Osun State.                                   |
| 3396 | OS/0108 | Hamstring Specialist Hospital & Diagnostic Centre | Isiah Okunola Street, off Okinni Grammer School, Okinni, Oshogbo                 |
| 3397 | OS/0109 | Titilope Medical Centre                           | Jaleoyemi Street, Off Station Road, Ikirun, Osun State                           |
| 3398 | OS/0110 | Victory Point Hospital                            | Ojoda New Town, Ile- idande, Osogbo, Osun State.                                 |
| 3399 | OS/0111 | Ultimate Specialist Hospital                      | No. 179 Fajuyi Road, Ile- lfe Osun State.                                        |
| 3400 | OS/0112 | Oloye Hospital                                    | Gbongan Road, Beside GTBank, Ogo-Oluwa Area, Osogbo Osun State                   |
| 3401 | OS/0113 | Living Hope Medical Centre                        | No. 26 Fola Aliu Street, Boripe Community, Rinsayo Area, Osogbo Osun State.      |
| 3402 | OS/0114 | Gold- Royal Hospital                              | Ojoyin Street, Beside De- Treasure Hotel, Ladere, Ile- lfe Osun State.           |
| 3403 | OS/0115 | Iyiola Hospital                                   | Back Of Meritan Petrol Station, Off Ilesha Road, lfe Osun State.                 |
| 3404 | OS/0116 | Shifa Medical Centre                              | No. 2 Old Osogbo Road, Odo- Amo A rea, Ikirun Osun State                         |
| 3405 | OS/0117 | Abitop Medical Centre                             | Opposite Phase 2, OAUTHC Ile- lfe Osun State.                                    |
| 3406 | OS/0118 | Dunafort Hospital & Laboratory Services           | Tinumola Area, Osogbo Osun State                                                 |
| 3407 | OS/0119 | Goodness & Mercy Specialist Hospital              | Christ life Centre, Ofatedo, Osogbo Osun State.                                  |
| 3408 | OS/0120 | Crystal Cross Specialist Hospital, Osogbo         | Off Total Filling Station, After FRSC, Gbongan Road, Osogbo Osun State.          |
| 3409 | OS/0121 | Emmanuel Specialist's Hospital                    | E27 Obayemi Street, Agborogboro Layout, Oranfe, Ilesha Road, Ile lfe Osun State. |
| 3410 | OS/0122 | Hope Nursing And Maternity                        | Arulogun Area, Ede Osun State                                                    |
| 3411 | OS/0124 | Hope Nursing And Maternity                        | Arulogun Area, Ede Osun State                                                    |
| 3412 | OS/0125 | Jola-Olu Specialist Hospital                      | Agunbelewo Ilobu Road, P.O. Box 979, Osogbo Osun State.                          |
| 3413 | OS/0126 | Zion Glory Hospital                               | Lane 1, Bolajoko Estate, Woru Area, Agunbelewo, Osogbo Osun State.               |
| 3414 | OS/0129 | Mercy Medical And Pathological Centre.            | 10 New Oba Road, Oke- Oniti, Osogbo Osun State                                   |
| 3415 | OS/0130 | Alpha Hospital & Maternity Home                   | 9 Adetoro Street, Near Moricaz Mosque, Ede Osun State                            |
| 3416 | OS/0131 | Amos- Alayo Hospital And Maternity                | Surulere Area , Ikirun Osun State                                                |
| 3417 | OS/0132 | Olanrewaju Medical Centre                         | Jagun Aregba Compound, Okuku                                                     |
| 3418 | OS/0133 | Alaafia-Oluwa Hospital And Maternity.             |                                                                                  |

|      |         |                                           |                                                                             |
|------|---------|-------------------------------------------|-----------------------------------------------------------------------------|
| 3419 | OS/0134 | Osun State University                     | Oke-baale, Osogbo                                                           |
| 3420 | OS/0135 | Mannabat Medical Centre                   | Opp. Old Tajudeen School, Off Sawmill Road, Ido-osun                        |
| 3421 | OS/0136 | Olanrewaju Medical Centre                 | Jagun Aregba Compound, Okuku Osun State                                     |
| 3422 | OS/0137 | Aalafia–Oluwa Hospital And Maternity      | Plot 5, Aladesanmi Street, Dada Estate, Osogbo Osun State                   |
| 3423 | OS/0138 | Osun State University                     | Oke-baale, Osogbo Osun State                                                |
| 3424 | OS/0139 | BWB Hospital                              | No.5 orisumbare Street, Kasmo Area, Oke-baale,Osogbo Osun State             |
| 3425 | OS/0140 | Rehoboth Ear, Nose and Throat Hospital    | Tajudeen Suleiman Street, Zone3, Behind M-Oyetunji Filling Station, Capital |
| 3426 | OS/0141 | Oke-baale Central Hospital                | Opp. Okebaale Police Station, Okebaale, Osogbo Osun State                   |
| 3427 | OS/0142 | Safe Parturition (SP) Specialist Hospital | 6, Abiodun Adeshina Street, Behind GOF Schools, Osogbo Osun State           |
| 3428 | OY/0001 | University College Hospital               | Ibadan                                                                      |
| 3429 | OY/0003 | Tobi Medical Centre Ltd.                  | 57/453 Felele Layout, Ibadan                                                |
| 3430 | OY/0004 | Molly Specialist Hospital                 | 18, Iwo Road Idiape Junction, Ibadan                                        |
| 3431 | OY/0005 | Badejoko Memorial Hospital                | Oremeji Mokola Opp. Premier, Hotel Junction, Ibadan                         |
| 3432 | OY/0006 | Welfare Hospital Ltd.                     | Old Ife Road Newgbagi, Market Area, Ibadan                                  |
| 3433 | OY/0007 | Gold Cross Medical Clinic                 | 36, Oje-Adeoye-Oje Road, Yemetu, Ibadan                                     |
| 3434 | OY/0008 | J. Rapha Hospital                         | No. 6, Aare Avenue New Bodija, Ibadan                                       |
| 3435 | OY/0009 | Adeoye Memorial Specialist Hospital       | Nw/ 4/185 George Street, Ibadan                                             |
| 3436 | OY/0010 | Mobolaji Hospital                         | 43, Obafemi Awolowo Way, Oke-Bola, Ibadan                                   |
| 3437 | OY/0011 | Idi-Ape Medical Centre                    | Plot 2 & 6, Afolabi Layout Idi-Ape, Ibadan                                  |
| 3438 | OY/0012 | Eyiolawi (Iyolawi) Memorial Hospital      | Opp. Islamic High School, Orita Bashanu, Ibadan                             |
| 3439 | OY/0013 | St. Martinas Hospital Ltd.                | NW6/309 Akintola Road, Ekotedo, Ibadan, Oyo State                           |
| 3440 | OY/0014 | Lanark Specialist Hospital                | Sw9/1423, State Hospital Road, Ring Road Area, Ibadan                       |
| 3441 | OY/0015 | Christus Special Hospital                 | Zion Building, Kayode Obenbe, Crescent, New Ire Road, Ibadan                |
| 3442 | OY/0028 | Lade Hospital & Maternity                 | SW 1171b Agege, Ibadan                                                      |
| 3443 | OY/0029 | Oluwaseyi Hospital                        | SW9/337 Abeokuta Road, Ibadan                                               |
| 3444 | OY/0030 | J.V.M. Hospital                           | No. 26, Imalefalafia Street, Oke-Ado, Ibadan                                |
| 3445 | OY/0031 | The Vine Hospital & Maternity Centre      | Block 10 Plot 24, Alafin Avenue, Oluyole Extension, Ibadan                  |

|      |         |                                                     |                                                                             |
|------|---------|-----------------------------------------------------|-----------------------------------------------------------------------------|
| 3446 | OY/0032 | Oke-Ado Hospital                                    | SW7/217, Ibukun Olu Street, Oke Ado, Ibadan                                 |
| 3447 | OY/0033 | Kings Hospital                                      | 3a Sodeinde Close, Anfanni, Ring Road, Ibadan                               |
| 3448 | OY/0034 | Trinity Hospital (Nig) Ltd.                         | 84, Fajuyi Road Ekotedo Adamasingga, Ibadan, Oyo State                      |
| 3449 | OY/0035 | Femi Specialist Hospital                            | 7, Bcos Road Basorun, Ibadan                                                |
| 3450 | OY/0036 | Teju Specialist Hospital Annex                      | Oyo-Ogbomosho Road, Ibadan                                                  |
| 3451 | OY/0042 | Kejide Specialist Hospital                          | Sw 9/704a Elewure Str., Challenge, Ibadan                                   |
| 3452 | OY/0043 | Mak Clinic                                          | By Alma Guest House Junction, Opp. Nitel New Bodija, Ibadan                 |
| 3453 | OY/0044 | Alafia Hospital                                     | Mokola, Ibadan                                                              |
| 3454 | OY/0051 | Teju Specialist Hospital                            | 6 Alh. Animasaun Street, Ring Road, Ibadan                                  |
| 3455 | OY/0052 | Toun Memorial Specialist Hospital                   | Km 1/2 New Life Road, Ibadan                                                |
| 3456 | OY/0063 | Dorji Hospital                                      | 14, Avenue New Bodija, Ibadan                                               |
| 3457 | OY/0064 | Dorji Hospital & Maternity                          | Abidokun Close Police Molete, Ibadan                                        |
| 3458 | OY/0065 | Molly Specialist Hospital                           | No.6, American Quarters Yidi, Ibadan                                        |
| 3459 | OY/0066 | Metropolitan Specialist Hospital & Mat.             | Ibadan,                                                                     |
| 3460 | OY/0067 | Lad Medical Centre                                  | 1 Lad Hospital Road, Beside Police Barracks, Orita Challenge, Ibadan        |
| 3461 | OY/0068 | Al-Hayyu Hospital                                   | Saw-Mill Ife Road, Ibadan                                                   |
| 3462 | OY/0069 | Saint Christopher's Hospital                        | 10, Okeremi Street, Off Shobande Ave. Oremeji, Ibadan                       |
| 3463 | OY/0070 | Asvon Hospital                                      | Km 11/4 Opp. New Gbagi Market, New Life Road, Ibadan                        |
| 3464 | OY/0071 | New Bodija Hospital Group                           | 3, Ayoola Drive, New Bodija, Ibadan                                         |
| 3465 | OY/0072 | Lafia Hospital                                      | Sw 9/960 Abeokuta Road, Apata, Ibadan                                       |
| 3466 | OY/0073 | Fadebi Memorial Hospital                            | Km 7, Iwo Road (Oki), Ibadan                                                |
| 3467 | OY/0074 | Modupe Hospital                                     | Via Akinloye Oje Area, Ibadan                                               |
| 3468 | OY/0075 | Medical Practitioners Services                      | Mokola Roundabout, Ibadan                                                   |
| 3469 | OY/0076 | Imperial Hospital                                   | Yemetu, Ibadan                                                              |
| 3470 | OY/0077 | Beta-Life Hospital                                  | 14, Popoola Yemoja Street, Off Awolowo Avenue, Oke Ado, Ibadan              |
| 3471 | OY/0078 | Highland Specialist Hospital                        | The House Of Hearing, Adeoyo Hospital Road, Yemetu, Ibadan                  |
| 3472 | OY/0079 | St. Mary's Catholic General Hospital, Eleta, Ibadan | Eleta, Ibadan, Oyo State                                                    |
| 3473 | OY/0080 | Dominic Hospital & Maternity                        | 7 Up Bus-Stop Monatani, Agodi, Ibadan                                       |
| 3474 | OY/0081 | Skyline Specialist Clinic                           | 14, Olalekan Alabi Close, Off Abayomi Bus Stop, Iwo Road, Ibadan, Oyo State |

|      |         |                                              |                                                                                      |
|------|---------|----------------------------------------------|--------------------------------------------------------------------------------------|
| 3475 | OY/0083 | Baptist Hospital                             | Oyo, Ibadan                                                                          |
| 3476 | OY/0084 | Fiditi General Hospital                      | Yemoja Area, Fiditi                                                                  |
| 3477 | OY/0085 | Florence Hospital                            | Near Co-Operative Building, Oja-Igbo, Ogbomoso                                       |
| 3478 | OY/0086 | Oyin Specialist Hospital                     | Airport Road, Ibadan                                                                 |
| 3479 | OY/0164 | DSS Clinic                                   | Ibadan, Oyo State                                                                    |
| 3480 | OY/0165 | 2 Div Hospital                               | Adekunle Fajuyi Cantonment, Ibadan                                                   |
| 3481 | OY/0166 | NAF Medical Centre                           | NAF Air Force Comp Sec. Sch. Ibadan                                                  |
| 3482 | OY/0167 | Muslim Hospital                              | Afote Road, Shaki                                                                    |
| 3483 | OY/0172 | Ireti Oluwa Hospital                         | Kajola Saw-Mill, Apake, Ogbomoso                                                     |
| 3484 | OY/0173 | General Hospital, Iseyin                     | Iseyin, Oyo State.                                                                   |
| 3485 | OY/0174 | Our Lady Catholic Hospital                   | Iseyin, Oyo State.                                                                   |
| 3486 | OY/0175 | Adeoyo Maternity Hospital                    | Yemetu Road, Ibadan.                                                                 |
| 3487 | OY/0176 | Ring Road Hospital                           | Ring Road, Ibadan                                                                    |
| 3488 | OY/0177 | Jerico General Hospital                      | Magazine Road, Jerico, Ibadan.                                                       |
| 3489 | OY/0178 | State Hospital, Oyo                          | Oyo, Oyo State                                                                       |
| 3490 | OY/0179 | State Hospital, Ogbomoso                     | Ogbomoso, Oyo State.                                                                 |
| 3491 | OY/0180 | Oni Memorial Children Hospital               | Ring Road, Ibadan                                                                    |
| 3492 | OY/0182 | State Hospital, Saki                         | Saki, Sango Road, Ibadan, Oyo State                                                  |
| 3493 | OY/0183 | Baptist Medical Centre, Saki                 | Ajgunle Area, Saki, Oyo State                                                        |
| 3494 | OY/0184 | Jerico Nursing Home                          | Magazine Road, Ibadan.                                                               |
| 3495 | OY/0186 | 244 Recce Bn MRS Shaki                       | Shaki, Oyo State                                                                     |
| 3496 | OY/0187 | 81 Bn MRS, Ibadan                            | Ibadan, Oyo State                                                                    |
| 3497 | OY/0188 | Cottage Hospital/Comprehensive Health Centre | Oyo Police Command, Ibadan, Oyo State                                                |
| 3498 | OY/0189 | Queen's Hospital                             | 38, Iya Olobe St. Dugbe Eketedo Ibadan                                               |
| 3499 | OY/0190 | St Lucia Hospital                            | Oke-Ado Ibadan                                                                       |
| 3500 | OY/0191 | Unity Medical Centre                         | 31 Eleyele Rd Ibadan                                                                 |
| 3501 | OY/0192 | St. Joseph Medical Centre                    | No 27 Akintola Rd Ekotedo Ibadan                                                     |
| 3502 | OY/0193 | Full House Spec. Dermatological Hospital     | 37, Adeniran Onyulola Ave, Ring Rd Ibadan                                            |
| 3503 | OY/0194 | Jokotola Memorial Infirmery Hospital         | Sw8/1073 Imalefalafia St Oke Ado Ibadan                                              |
| 3504 | OY/0195 | Anu Oluwa Specialist Hospital                | 19 Bluegate Avenue, Oluyole Estate Extension, Ibadan                                 |
| 3505 | OY/0196 | Joy Hospital & Maternity Centre              | 32 Morgan St. Oke-Ado Ibadan                                                         |
| 3506 | OY/0197 | Fajimi Memorial Hospital                     | Aba Eja, Tinuoye, off Army Barrack Rd Behind Total Petrol Station Ojoo               |
| 3507 | OY/0198 | Mommoh Memorial Hospital                     | Idi-Ope Oyo                                                                          |
| 3508 | OY/0199 | New Day Hospital                             | Behind Hosanna Joe Restuarant Off Ibadan-Lagos Express Rd Owode-Academy Area, Ibadan |
| 3509 | OY/0200 | Faith Foundation Hospital                    | Okeho Rd Iseyin Oyo State                                                            |



|      |         |                                                           |                                                                                        |
|------|---------|-----------------------------------------------------------|----------------------------------------------------------------------------------------|
| 3510 | OY/0201 | Faith Medical Hospital                                    | No. 40 Nitel Rd, Ogbomosho Oyo State                                                   |
| 3511 | OY/0202 | Shekinah Medical Centre                                   | No.2 Bamgboshe Street Owode Oyo                                                        |
| 3512 | OY/0203 | Victory Medical Centre                                    | House 4, Road 120,80,20, NW7 Poly-Eleyele Rd, Mosafejo B/Stop Ibadan                   |
| 3513 | OY/0205 | Olayonu Medical Centre Hospital & Maternity Services      | Ole Agbala Masia Area Ogbomosho, Oyo State                                             |
| 3514 | OY/0206 | Shalom Medical Centre                                     | Sabo Area Ogbomosho                                                                    |
| 3515 | OY/0207 | Oluwaseun Clinic & Maternity                              | Toye Ajagun Area NNPC Pipeline Okonlawo L/out Apata Ibadan                             |
| 3516 | OY/0208 | Modupe Hospital                                           | Powerline Onikokoro Akobo Jurin, Ibadan                                                |
| 3517 | OY/0210 | Divine Favour Hospital                                    | Iyana Church, Along Isebo Rd, Jinarere Bus stop, Ibadan                                |
| 3518 | OY/0211 | Zoe Specialist Mission Hospital                           | No.4 Adeogun Str., Oluyele Estate, Ibadan                                              |
| 3519 | OY/0212 | Continental Medical Centre                                | S7/998A Engineer Adebajo Oshinbowale Close, Challenge Ibadan                           |
| 3520 | OY/0213 | NAF Detachment Medical Centre                             | Ibadan, Oyo State                                                                      |
| 3521 | OY/0242 | Bowen University Teaching Hospital, Ogbomoso              | Ogbomosho, Oyo State                                                                   |
| 3522 | OY/0243 | New World Specialist Hospital                             | No. 7, Omona Yajo Close, Behind Children Home Sch. College Cresc., Molete Area, Ibadan |
| 3523 | OY/0245 | Bisol Medical Centre                                      | Ilorra, Beside Immanuel Baptist Church Mafojubaye Street, Ilora                        |
| 3524 | OY/0246 | Ayo Hospital                                              | Premium House Annex, Magazine Road, Jerico, Ibadan                                     |
| 3525 | OY/0249 | Ayo Hospital                                              | Behind St. Lucia Hospital, Oke-Ado, Ibadan                                             |
| 3526 | OY/0250 | Catholic Hospital, Oluyoro                                | Oluyoro, Ibadan, Oyo State                                                             |
| 3527 | OY/0251 | Bethel Specialist Hospital                                | 30, Oyo Road, Coca/Oremeji Area Ajibade Bus Stop, Ibadan                               |
| 3528 | OY/0252 | University of Ibadan Health Services (Jaja Health Clinic) | Ibadan, Oyo State                                                                      |
| 3529 | OY/0253 | Fed. College of Educ. Special Medical Centre              | Oyo State                                                                              |
| 3530 | OY/0256 | Abiola Memorial Hospital                                  | N4/790 Yemetu, Ibadan                                                                  |
| 3531 | OY/0257 | Aggrey Hospital                                           | 92 Yemetu Adeoyo Rd, Yemetu-Oja Bus Stop, Ibadan                                       |
| 3532 | OY/0258 | Alawaye Hospital & Nursing Home Ltd                       | 7, Alawaye Hospital Road, Iwo Road, Ibadan                                             |
| 3533 | OY/0259 | Alms Hospital                                             | Esuruoso Layout, Sharp Corner, Apata, Ibadan                                           |
| 3534 | OY/0260 | Ariyo Medical Centre                                      | 57/57B Oba Abimbola Rd, Felele, Ibadan                                                 |

|      |         |                                      |                                                                    |
|------|---------|--------------------------------------|--------------------------------------------------------------------|
| 3535 | OY/0261 | Ariyo Medical Centre Ltd.            | 7 Irepodun Str Agbowo Bodija (Near the Market), Ibadan             |
| 3536 | OY/0262 | Christus Specialist Hospital         | Olive House Blk N6/53 Fajuyi Rd, Ibadan                            |
| 3537 | OY/0263 | Banby Specialist Hospital            | Plot 11, Blk XLII, Akobo Estate, Olorunda-Abaa Rd, Ibadan          |
| 3538 | OY/0264 | Comfort Medical Centre               | 10, Lakanmi Close to Toatle Garden, Ibadan                         |
| 3539 | OY/0265 | SOLAAK SPECIALIST CLINICS            | 11 SODEHINDE STR, OFF ANFANI RD, RING RD, IBADAN                   |
| 3540 | OY/0268 | DOCTORS POLYCLINIC                   | 12 AKINTOLA STR, AGBOWO U.I IBADAN                                 |
| 3541 | OY/0269 | JOLAMADE SPECIALIST HOSPITAL         | PLOT C2-C3 SALAMI SOMADE ESTATE,BASORUN, IBADAN                    |
| 3542 | OY/0270 | IBADAN CENTRAL HOSPITAL              | OSOSAMI RD, OFF RING RD,IBADAN                                     |
| 3543 | OY/0271 | FORTUNE HOSPITAL & DENTAL CENTRE     | 32 MKO ABIOLA WAY , RING RD, IBADAN, ANFANI ROUNDABOUT             |
| 3544 | OY/0272 | HERITAGE COMPREHENSIVE HOSPITAL      | 57 ANFANI RD, RING RD, IBADAN                                      |
| 3545 | OY/0273 | VICTORY HOSPITAL                     | SW 8/949F ADE- OLUYOYE STR, OSOANMI, OKE ADO                       |
| 3546 | OY/0275 | MERCYLAND HOSPITAL & DENTAL          | OPP. NEW GBAGI MARKET NEW IFE RD,IBADAN                            |
| 3547 | OY/0276 | EBENEZER CLINIC ( HOSP. & MAT. HOME) | 3/5 ONI LANE, OFF YEMETU ADEOYO RD,IBADAN                          |
| 3548 | OY/0277 | JOLALEKE SPEC. HOSPITAL              | 12 ALONG FODASIS RD, OPP. NEW ADEOYO HOSPITAL. IBADAN              |
| 3549 | OY/0278 | Shalom Group Medical Centre          | Aboderin Close, Agbaje Orita Challenge, Ibadan                     |
| 3550 | OY/0279 | CROWN HOSPITAL                       | SW 9/1147A AGBAJE B/STOP, ORITA CHALLENGE,IBADAN                   |
| 3551 | OY/0280 | HOPE MEDICAL CENTRE                  | Yemetu - Adeoyo Bere Road                                          |
| 3552 | OY/0281 | FELEWA HOSPITAL                      | SW8/442A COLLEGE CRESC, OKE ADO IBADAN                             |
| 3553 | OY/0282 | GRACE HOSPITAL & MATERNITY           | 1, AROTAYO STR, AROMETA BUS-STOP, SANGO/POLY ROAD, ELEYELE, IBADAN |
| 3554 | OY/0283 | HOSSANA SPEC. HOSPITAL               | 95AB SURULERE STR, ABGOWO U.I. IBADAN                              |
| 3555 | OY/0284 | LAFIA HOSPITAL                       | 60B FAGBOUN RD, OKEBLA. IBADAN                                     |
| 3556 | OY/0285 | Peamak Hospital & Maternity Centre   | Alalubosa Road Oyo                                                 |
| 3557 | OY/0286 | PROVIDENCE POLYCLINIC                | OLAOGUN OLD IFE RD, IBADAN                                         |
| 3558 | OY/0287 | ROYAL CLINIC & MAT. NIG. LTD         | 58 OYO RD, VETERINARY B/STOP MOKOLA, IBADAN                        |
| 3559 | OY/0288 | Santhos Hospital                     | Odedele Odeleke Street, Challenge, Ibadan                          |
| 3560 | OY/0289 | ST. GEORGE'S NURSING HOME            | 57 OBAFEMI AWOLOWO RD, OKEBOLA . IBADAN                            |

|      |         |                                      |                                                                                             |
|------|---------|--------------------------------------|---------------------------------------------------------------------------------------------|
| 3561 | OY/0290 | ST.Jacob's Msiission Hospital        | Road 26, Owode Housing Estate, Beside Tafo Event Center, Along Abeokuta Road, Apata, Ibadan |
| 3562 | OY/0291 | ST.VINCENT MEDICAL CENTRE            | 34 AARE AVENUE , NEW BODIJA ESTATE,IBADAN                                                   |
| 3563 | OY/0292 | TZ HOSPITAL & MATERNITY              | AGBAKIN LAYOUT BEHIND MR BIGGS IWO RD,IBADAN                                                |
| 3564 | OY/0343 | Nigerian Railway Hospital            | Dugbe, Ibadan, Oyo State                                                                    |
| 3565 | OY/0344 | CORNERSTONE MEDICAL CENTRE           | N6A/816B Loco Street, Sango, Ibadan                                                         |
| 3566 | OY/0345 | Chrisbo Medical Centre               | House 11, Plot 1, Phase III, Bashorun Estate, Akobo, Ibadan                                 |
| 3567 | OY/0348 | Foremost Base Hospital Limited       | 1 Rufai Street N6A/958 Coca Cola Area, Ibadan                                               |
| 3568 | OY/0350 | St Rita's Clinic & Maternity Home    | 9 Maboreje Street, Iwo Road, Ibadan                                                         |
| 3569 | OY/0354 | St Patric's Hospital                 | 107/780 Idi Ope                                                                             |
| 3570 | OY/0357 | St Marelo Catholic Hospital          | Opere Village, Ibadan                                                                       |
| 3571 | OY/0358 | Restoration Hospital                 | 12, Alagbangba Street, Off Ashi Road Ibadan                                                 |
| 3572 | OY/0360 | KAY KAY SPECIALIST                   | PLOT 15 BLK 10 ORITA BASHERUN ESTATE,AKOBO IBADAN LAGELU L.G.A                              |
| 3573 | OY/0361 | Iye Hospital Ltd                     | 22 Osibodu Layout Lagos/Ibadan Express Road, Ibadan                                         |
| 3574 | OY/0363 | Samron Medical Centre                | 62 Adebisi Street, Joyce - B Road off Ring Road Ibadan                                      |
| 3575 | OY/0365 | First Life Hospital                  | 5 Molusi Street Molete, Ibadan                                                              |
| 3576 | OY/0366 | St Dominic Catholic Hospital         | Ogungbade Village, New Ife Road, Ibadan                                                     |
| 3577 | OY/0367 | Hamdala Hospital & Maternity         | Transformer Bus Stop, Agbowo, UI, Ibadan                                                    |
| 3578 | OY/0368 | Abayomi Hospital                     | Idi-Oro, Behind California Hotel, Ogbomosho                                                 |
| 3579 | OY/0369 | Laduntan Hospital                    | Okegbade Road, Ogbomosho                                                                    |
| 3580 | OY/0372 | Immaculate Hospital                  | 23 Odutola Road Off Ososami Road, Oke Ado, Ibadan                                           |
| 3581 | OY/0376 | Odinjo Primary Health Centre         | Ibadan                                                                                      |
| 3582 | OY/0378 | Mapo Primary Health Centre           | Ibadan                                                                                      |
| 3583 | OY/0379 | Oranyan Primary Health Centre        | Ibadan                                                                                      |
| 3584 | OY/0381 | Molete Primary Health Centre         | Ibadan                                                                                      |
| 3585 | OY/0383 | Oke Olola Primary Health Centre      | Oyo                                                                                         |
| 3586 | OY/0384 | Koso Primary Health Centre           | Oyo                                                                                         |
| 3587 | OY/0385 | Otefon Primary Health Centre         | Oyo                                                                                         |
| 3588 | OY/0386 | Igbonla Primary Health Centre        | Oyo                                                                                         |
| 3589 | OY/0387 | Ibrahim Taiwo Primary Health Centre  | Ibrahim Taiwo Way, Ogbomoso                                                                 |
| 3590 | OY/0388 | Okeelerin Primary Health Centre      | Ogbomoso                                                                                    |
| 3591 | OY/0390 | Isale Oyo Primary Health Centre      | Oyo                                                                                         |
| 3592 | OY/0391 | Ilowagbade Oyo Primary Health Centre | Oyo                                                                                         |
| 3593 | OY/0392 | Oke Oroki Oyo Primary Health Centre  | Oyo                                                                                         |

|      |         |                                                 |                                                                                          |
|------|---------|-------------------------------------------------|------------------------------------------------------------------------------------------|
| 3594 | OY/0393 | Muslim Ummah Hospital                           | KM 5 Kiamo Road Kisi                                                                     |
| 3595 | OY/0395 | Sunday Adewusi Jagun Primary Health Centre      | Ogbomoso                                                                                 |
| 3596 | OY/0396 | Tarra Health Centre                             | Ogbomoso                                                                                 |
| 3597 | OY/0397 | Ikose Health Centre                             | Ogbomoso                                                                                 |
| 3598 | OY/0398 | Masifa-Aguodo Health Post                       | Ogbomoso                                                                                 |
| 3599 | OY/0399 | Benbow Medical Centre                           | Gbelekale Junction, Arein Road, Aremon, Ibadan                                           |
| 3600 | OY/0402 | Anu Oluwa Hospital                              | Opp The Blood of Jesus Apostolic Church, Oke Itunu, Mokola Ibadan                        |
| 3601 | OY/0403 | Al-Amaq Medical Centre                          | Oke-Bola Street, Ibadan                                                                  |
| 3602 | OY/0405 | Beta Life Hospital                              | 6 Adegbite Street, Agbowo, University of Ibadan                                          |
| 3603 | OY/0406 | Camaria Specialist Hospital                     | 13 Camaria Road, Oluwa Bashorun, Ibadan                                                  |
| 3604 | OY/0408 | Elyon Sepcialist Clinic                         | 72 Iwo Road, Ibadan                                                                      |
| 3605 | OY/0409 | Nasrullahi Medical Centre                       | 53/27, Labo Area, Ibadan                                                                 |
| 3606 | OY/0410 | Beatrice Medical Centre                         | 16 Bode Kumapaiji Street, Off Iwo Road, Ibadan                                           |
| 3607 | OY/0411 | Lagelu Medical Centre                           | Plot 19, Block 40, Oluyole Estate Extension, Ibadan                                      |
| 3608 | OY/0413 | Christ Hope Hospital and Maternity              | 59 Ijaye Road, Moniya, Ibadan                                                            |
| 3609 | OY/0414 | Ola Oluwa Medical                               | SW8/6333, Isale Ososami, Ibadan                                                          |
| 3610 | OY/0415 | Durojaiye Memorial Hospital                     | 7 Animashaun Street near Muslim Grammar School, Odinjo, Ibadan                           |
| 3611 | OY/0417 | Sunnydale Hospital                              | 1 Main Avenue, Alalubosa, GRA, Ibadan                                                    |
| 3612 | OY/0419 | Mosaq Ogo-Oluwa Hospital                        | No. 242 Aiyepe Area, Ibadan                                                              |
| 3613 | OY/0420 | Jobi Memorial Hospital                          | Opp St Cyprian Catholic Church, Oke Offa, Ibadan                                         |
| 3614 | OY/0423 | Omotayo Maternity Home                          | SW8/517A Oluyole Street, Oke Ado Ibadan                                                  |
| 3615 | OY/0424 | Lily Hospital and Maternity                     | Beside People of Faith Gospel Church, Providence, off Aro Meta B/Stop Eleyele Rd, Ibadan |
| 3616 | OY/0425 | Oluwayomi Hospital                              | 3 Oyeniwe Street, Olorombo, Bashorun, Ibadan                                             |
| 3617 | OY/0426 | Ayofunmi Hospital and Maternity                 | 43 Polytechnic Road, Sango, Ibadan                                                       |
| 3618 | OY/0429 | Vine Branch Maternity and Infant Welfare Centre | Plot 4, Block 5, Road 302 Agodi GRA, Ibadan                                              |
| 3619 | OY/0433 | Saanu Memorial Hospital                         | Ijokodo Agbaje Road, Ibadan                                                              |
| 3620 | OY/0434 | Aramed Medical Centre                           | KM 15, Lagos-Ibadan Expressway, Ibadan                                                   |
| 3621 | OY/0436 | Adeoto Memorial Hospital                        | Popo Bus Stop, Akobo Ojurin, Ibadan                                                      |
| 3622 | OY/0437 | Premier Hospital                                | SW5/265 Atere Compound, Itamaya Ibadan                                                   |

|      |         |                                                       |                                                                                                        |
|------|---------|-------------------------------------------------------|--------------------------------------------------------------------------------------------------------|
| 3623 | OY/0439 | Hallel Specialist Hospital                            | # 11, Ilupeju Estate, Akobo-ojurin, Ibadan.                                                            |
| 3624 | OY/0440 | Evangel Med Center                                    | Dejo Dairo Street, Adex B/Stop, Monotan, Ibadan                                                        |
| 3625 | OY/0441 | Oroki Med Centre                                      | Oke Oroki, Oyo                                                                                         |
| 3626 | OY/0442 | Mayokun Hospital                                      | Ajangba Estate Kisi                                                                                    |
| 3627 | OY/0446 | St Anne's Specialist Hospital                         | #9, Moremi Rd, off Aare Avenue, Bodija, Ibadan                                                         |
| 3628 | OY/0447 | Odun Lakin Specialist Hospital                        | Plot 18, & 19, Block 5B, Adewumi Layout, Afani Rd, Ibadan                                              |
| 3629 | OY/0448 | Cocoa Research Institute Of Nigeria Health Centre     | Idi -Ayunre, km 14, Ibadan - Ijebu Ode road, Oyo state                                                 |
| 3630 | OY/0451 | Ebimacc Maternity & Health Care Clinic                | Odo-Ona, Elewe, Academy road, off Orita challenge, Ibadan, Oyo state                                   |
| 3631 | OY/0453 | Oluwafemi Specialist Hospital                         | Gbogun Owode, Apata, Ibadan, Oyo State                                                                 |
| 3632 | OY/0454 | Shiloh Medical Centre & Maternity                     | Lane 17, Ajokukan Ave, Elebu, Oluyole Ext. Ibadan, Oyo State                                           |
| 3633 | OY/0455 | God's Faithfulness Hospital                           | 77, Apanpa Layout, Imalefalafi Street, Behind Odutola Tire Factory, Ibadan, Oyo State                  |
| 3634 | OY/0456 | Castle Hospital & Maternity Center                    | 45, Adeyi Avenue, Old Bodija, Ibadan, Oyo State                                                        |
| 3635 | OY/0457 | Abraham & Maria Hospital & Diagnostic Centre          | 1 Emmanuel Adewale Avenue, Off Arola – Ayegun Road, Ibadan, Oyo State                                  |
| 3636 | OY/0458 | Baptist Cottage Hospital, Omi-Adio                    | Oke-Oloro Street, Omi-Adio, Oyo State                                                                  |
| 3637 | OY/0459 | Olayinka Maternity Health Center                      | Plot 10, Coker Layout, Idi-Ishin, Jericho Quaters (Aka St. Florence Clinic, Agbeni), Ibadan, Oyo State |
| 3638 | OY/0460 | Segun Adeniyi Memorial Health Clinic & Maternity Home | 17, Adedayo Street Kuola, Apata, Ibadan, Oyo State                                                     |
| 3639 | OY/0461 | Naomi Medical Centre                                  | 3, Araromi Lane, Beside Daily Times Office, Oke Padre, Ibadan, Oyo State                               |
| 3640 | OY/0462 | The Horizon Hospital                                  | 23, Odutola Street, Behind Conac Optical Imalefalafia, Oke-Ado, Ibadan, Oyo State                      |
| 3641 | OY/0463 | God's Faithfulness Hospital                           | 77, Apampa Layout, Imalefalafi Street, Behind Odutola Tyre Factory, Ibadan, Oyo State                  |
| 3642 | OY/0464 | Molete Diagnostic & Clinical Services Limited         | 270, Obafemi Awolowo Way, Molete, Oyo State                                                            |
| 3643 | OY/0465 | Best Care Hospital                                    | 1, Alhaji Adeniran Street, Oke Itunnu, Mokola, Ibadan, Oyo State                                       |
| 3644 | OY/0466 | Royal Crown Specialist Hospital                       | Plot 7, Phase II Akobo, Ibadan, Oyo State                                                              |

|      |         |                                     |                                                                                                        |
|------|---------|-------------------------------------|--------------------------------------------------------------------------------------------------------|
| 3645 | OY/0467 | Oniwumi Medical centre              | Abayomi Street, Off Abayomi Bus Stop, Iwo Road Ibadan, Oyo State                                       |
| 3646 | OY/0468 | Police Clinic, Agodi                | Agodi                                                                                                  |
| 3647 | OY/0470 | Police Clinic, Ogbomoso             | Ogbomoso                                                                                               |
| 3648 | OY/0471 | Police Clinic, Challenge            |                                                                                                        |
| 3649 | OY/0474 | Lead City University                | Lead City University Near Toll Gate, Ibadan Oyo State                                                  |
| 3650 | OY/0475 | College Medical Centre              | Federal College Of Animal Health And Production Technology Ibadan, Oyo State                           |
| 3651 | OY/0479 | Zion Hospital & Maternity           | Oke Ayo Premises, Beside Oando Filling Station, Ayaganku Expressway, Ibadan Oyo State.                 |
| 3652 | OY/0480 | Glory Medical Centre                | Adjacent Overcomer School, Mabolaje, Oyo Oyo State.                                                    |
| 3653 | OY/0483 | The Issachar Medical Centre         | 11 Super Guest House Road, Aba Alfa (Ogundele Estate), Ibadan Oyo State                                |
| 3654 | OY/0485 | Redeemer's Health Centre            | 37 Awolowo Avenue Old Bodija, Ibadan Oyo State                                                         |
| 3655 | OY/0487 | Bronx Hospital Ltd                  | 6 Oba Oyewusi Street, Off Tunde Lakanmi Crescent, Off Osuntokun Avenue, Old Bodija, Ibadan. Oyo State. |
| 3656 | OY/0488 | Ramoth-Gilead Hospital              | 44, Liberty Stadium Road, Ibadan Oyo State.                                                            |
| 3657 | OY/0489 | Alaafia Tayo Clinic And Maternity   | Plot4 Alagba Layout Olomi Ibadan Oyo State.                                                            |
| 3658 | OY/0490 | Police Clinic Oyo                   | Atiba Police Barracks, Akunlemu                                                                        |
| 3659 | OY/0491 | Montana Medical Centre              | No. 7 Kajegbo Str. Opp. Chicken Republic Elewura Challenge Ibadan Oyo State                            |
| 3660 | OY/0493 | Agugu Central Hospital              | No. 12 Agugu Oluyoro Road Ibadan Oyo State                                                             |
| 3661 | OY/0494 | Safepath Hospital                   | No. 3 Adejumo Str. Behind Zenith Bank Challenge Ibadan Oyo State                                       |
| 3662 | OY/0496 | St. Macrina Hospital Ltd            | Swb/21 College Crescent Molete Challenge Ibadan Oyo State                                              |
| 3663 | OY/0497 | The Rock Medical Services           | 21 Excellent Avenue Alabidun Airport Road Alaika Ibadan Oyo State                                      |
| 3664 | OY/0499 | Hermon Pharmcare Nig. Ltd.          | 1 Irepodun Close, Off Ososami New Adeoyo Round About Ring Road Ibadan Oyo State                        |
| 3665 | OY/0500 | Zenith Hospital                     | Opp. Airmark Filling Station, Oluyole Ext., Ibadan Oyo State                                           |
| 3666 | OY/0501 | Ogo Oluwa Welfare Medical Centre.   | Opp. Baptist High Sch. Kajola, Ogbomoso Oyo State.                                                     |
| 3667 | OY/0502 | Delight Hospital & Fertility Centre | No. 1, Emmanuel Close, Elewura, Ring road, Ibadan Oyo State                                            |

|      |         |                                                               |                                                                                            |
|------|---------|---------------------------------------------------------------|--------------------------------------------------------------------------------------------|
| 3668 | OY/0503 | King's Way International Hospital                             | 1 Adenuga Str. Kogi, New Bodija<br>Ibadan Oyo State                                        |
| 3669 | OY/0504 | God's Knot Hospital                                           | 7, Ologuneru Rd. Iyana Ekerin Beside<br>Police Station Ibadan Oyo State                    |
| 3670 | OY/0507 | Al-Safura Medical Diagnostic                                  | Near Kadupe Community Bank<br>Sanngo, Saki Oyo State                                       |
| 3671 | OY/0511 | Jubilee Hospital                                              | Samonda Market Complex, Sango<br>Behind Oyo State Trade Fair Complex,<br>Ibadan Oyo State. |
| 3672 | OY/0512 | Grace & Favour Specialist Hospital LTD                        | Apa-Baale Bus Stop Off Love Of Christ<br>Global Church, Oyo State.                         |
| 3673 | OY/0513 | Moviv Specialist Hopital Limited                              | Adetoun Area, Off Eruwa Road<br>Ologuneru Eleyele, Ibadan Oyo State.                       |
| 3674 | OY/0516 | Ayokemi Hospital & ultrasound centre                          | Adex Bus/Stop Behind filling Station,<br>Monatan Ibadan, Oyo State.                        |
| 3675 | OY/0518 | Ladoke Akintola University of Technology<br>Teaching Hospital | Ogbomoso, Oyo State                                                                        |
| 3676 | OY/0520 | Ladoke Akintola University Of Technology                      | Ilorin Road Ogbomoso Oyo State                                                             |
| 3677 | OY/0523 | Popular Hospital                                              | 34, Arigidi Street, Old Bodija, Ibadan<br>Oyo State                                        |
| 3678 | OY/0524 | Sure Hope Clinic                                              | Carpenter Bus Stop, Ologuneru Eruwa<br>Road Ibadan, Oyo State                              |
| 3679 | OY/0530 | Joy Hospital & Maternity Centre                               | 32, Adeyinka Morgan Street, Oke-<br>Ado, Ibadan                                            |
| 3680 | OY/0532 | The family specialist Hospital                                | 15, Water Reservoir Road, Oluwala<br>Basorun, Ibadan                                       |
| 3681 | PL/0001 | General Hospital, Barkin-Ladi                                 | Barkin-Ladi                                                                                |
| 3682 | PL/0003 | Cottage Hospital, Bassa                                       | Bassa                                                                                      |
| 3683 | PL/0005 | Cottage Hospital, Bokkos                                      | Bokkos                                                                                     |
| 3684 | PL/0007 | Eldin Specialist Hospital                                     | 12 Dogon Dutse Road, Jos                                                                   |
| 3685 | PL/0008 | New Era Clinic                                                | Jk 27 Chollon Street, Off Akpata                                                           |
| 3686 | PL/0009 | Sauki Clinic & Hospital                                       | Joseph Gomwalk Road                                                                        |
| 3687 | PL/0010 | Kauna Hospital                                                | 35 Ahmadu Bello Way, On Rwang-<br>Pam                                                      |
| 3688 | PL/0011 | General Hospital, Langtang                                    | Langtang, Jos                                                                              |
| 3689 | PL/0014 | Chillas Specialist Hospital                                   | 20 Zaria Bye Pass, Jos                                                                     |
| 3690 | PL/0015 | General Hospital, Pankshin                                    | Pankshin                                                                                   |
| 3691 | PL/0018 | Alpha Medical Centre                                          | 7, Delimi Street, Jos                                                                      |
| 3692 | PL/0019 | Adoose Specialist Hospital                                    | 25, Ibrahim Dasuki Street                                                                  |
| 3693 | PL/0020 | Comprehensive Health Centre                                   | Dadin Kowa                                                                                 |
| 3694 | PL/0022 | General Hospital, Shendam                                     | Shendam                                                                                    |
| 3695 | PL/0023 | Gwash Specialist Hospital                                     | New Abuja, Opp Summary Hotel,<br>Dadin Kowa, Jos South LGA                                 |
| 3696 | PL/0057 | 3 Div Hospital                                                | Maxwel Khobe Cantonment, Jos                                                               |
| 3697 | PL/0058 | 463 Nigerian Airforce Hospital                                | NAF Station, Jos                                                                           |
| 3698 | PL/0059 | Federal Staff Clinic                                          | Federal Secretariat, Jos, Plateau State                                                    |

|      |         |                                                                 |                                                            |
|------|---------|-----------------------------------------------------------------|------------------------------------------------------------|
| 3699 | PL/0061 | 332 AR MRS Shendan                                              | Shendan, Plateau State                                     |
| 3700 | PL/0064 | University of Jos Health Centre                                 | Jos, Plateau State                                         |
| 3701 | PL/0066 | Cottage Hospital/Comprehensive Health Centre                    | Police Staff College, Jos                                  |
| 3702 | PL/0067 | Matanmi Hospital                                                | 89 Masallachin Juma'a Jos                                  |
| 3703 | PL/0068 | Memorial Medical Centre (Dakwak)                                | Special Site Pankshin                                      |
| 3704 | PL/0069 | May Hospital                                                    | Yelwa Rd Box 181 Shendam                                   |
| 3705 | PL/0070 | Nissi Dominus Medical Centre                                    | Jaktu Estate Mangu                                         |
| 3706 | PL/0071 | Helpang Medical Centre                                          | Helpang Barikin Ladi                                       |
| 3707 | PL/0072 | Samantha Lucil Hospital                                         | 16, Enugu-Agidi street Jos                                 |
| 3708 | PL/0073 | Bene Clinic                                                     | Yelwa Road Box 204 Shendam                                 |
| 3709 | PL/0075 | Our Lady Of Apostle Hospital ( O. L. A. )                       | 1 Zaria By pass Jos                                        |
| 3710 | PL/0076 | Solat Women Hospital                                            | 44 Kashim Ibrahim Street Jos                               |
| 3711 | PL/0077 | Bukuru Specialist Hospital                                      | Gyel Gyero Road Jos                                        |
| 3712 | PL/0078 | Federal Lowcost Clinic And Maternity                            | Federal Lowcost Miango Road Jos                            |
| 3713 | PL/0079 | Nassarawa Medical Centre                                        | 4B Dogon Dutse Jos                                         |
| 3714 | PL/0080 | Lawrak Hospital                                                 | 21, Temple Road Off Miango Road Jos                        |
| 3715 | PL/0100 | Jos University Teaching Hospital                                | Murtala Mohammed Way, Jos                                  |
| 3716 | PL/0102 | Plateau Specialist Hospital                                     | Jos, Plateau State                                         |
| 3717 | PL/0103 | DSS Clinic                                                      | Jos, Plateau State                                         |
| 3718 | PL/0104 | Police Clinic, Jos                                              | Jos, Plateau State                                         |
| 3719 | PL/0105 | Fed. College of Education, Pankshin                             | Pankshin, Plateau State                                    |
| 3720 | PL/0106 | National Inst. for Policy & Strategic Studies<br>Medical Centre | Jos South, Jos, Plateau State                              |
| 3721 | PL/0107 | Ola Hospital & Orphanage Zawan                                  | Ola Hospital, Zawan, Plateau State                         |
| 3722 | PL/0108 | Hwolshe Medical Centre                                          | Tudun Wada Ring Road, P O Box 8103,<br>Anglo, Jos.         |
| 3723 | PL/0112 | Virgill Mem Catholic Health Centre                              | Namu P O Box 10 Shendam, Jos                               |
| 3724 | PL/0113 | Federal College of Education Staff Clinic                       | FCE, PMB 27, Jos, Plateau State                            |
| 3725 | PL/0115 | Aminci Hospital                                                 | Bwandang, Bukuru, Jos                                      |
| 3726 | PL/0116 | Focus Hospital                                                  | No. 7 NEPA Close, Tudun Wada<br>Layout, Jos                |
| 3727 | PL/0117 | Jenvak Hospital                                                 | 22, T/Wada Ring Road, Jos                                  |
| 3728 | PL/0120 | Ultima Clinic & Maternity                                       | 15, Fudawa Ring Road, Yan-Trailer, Jos                     |
| 3729 | PL/0121 | Vom Christian Hospital                                          | Vom, Plateau State                                         |
| 3730 | PL/0122 | NIPSS Staff Clinic                                              | Kuru, Jos                                                  |
| 3731 | PL/0124 | Skane Radio-Diagnostic Centre Nig. Ltd                          | 32B Ibrahim Taiwo Road, Jos, Opp.<br>Plateau Hospital, Jos |
| 3732 | PL/0139 | M & B Medical Centre                                            | Dorowa Village, Bukuru                                     |
| 3733 | PL/0141 | Tadam Medical Centre                                            | 41 Yakubu Gowon Way, Old Airport<br>Road                   |
| 3734 | PL/0143 | Ginza Medical Centre                                            | 38A, Tafawa Balewa Street, Jos                             |
| 3735 | PL/0148 | Mandela Klinik                                                  | Beside Police Station K/Vom                                |
| 3736 | PL/0150 | Bingham University Teaching Hospital, Jos                       | 23 Zaria By Pass, Jos                                      |
| 3737 | PL/0153 | Graceville Royal Hospitals                                      | 23T Unity Lane, Dadin Kowa, Jos                            |
| 3738 | PL/0157 | Gaccon Hospital & Maternity                                     | 2 Alheri Police Station, Jos, Plateau<br>State.            |



|      |         |                                         |                                                                                             |
|------|---------|-----------------------------------------|---------------------------------------------------------------------------------------------|
| 3739 | PL/0158 | Dee Medical Centre                      | Plot BP 1669/21 Bukuru Express way,<br>Off Kugiya Road, Jos, Plateau State.                 |
| 3740 | PL/0159 | Fertile Ground Hospital                 | Plot 1234, Zaramaganda, Jos,<br>Adjacent Golden Bread, Plateau State.                       |
| 3741 | PL/0161 | Marysol Specialist Hospital             | Kwang Delimi, Off Rayfield Resort<br>Road, Jos, Plateau State.                              |
| 3742 | PL/0162 | Rayfield Medical Service LTD            | 30, Raphael Davon Street, Rayfield<br>Jos, Plateau State.                                   |
| 3743 | PL/0163 | Adventist Health International          | Seventh Day Adventist Hospital,<br>Jengre, Plateau State.                                   |
| 3744 | PL/0164 | Oasis Medical Centre Limited            | No. 47, Yakubu Gowon Way, Jos.                                                              |
| 3745 | PL/0165 | Mashiah Foundation Clinic               | Behind JMDB Qtrs Tundu Wada, Jos,<br>Plateau State.                                         |
| 3746 | PL/0166 | Cottage Hospital Dyeroil                | Dyeroil, Plateau State.                                                                     |
| 3747 | PL/0167 | Parkview Family Medicine Royal Hospital | By Solomon Lar Amusement Park,<br>Domkat Bali Way, Jos, Plateau State                       |
| 3748 | PL/0168 | Kauna Health Clinic & Maternity         | Opp Tudun Wada Police Station, Jos,<br>Plateau State.                                       |
| 3749 | PL/0169 | Hope Hill Specialist Medical Centre     | No. 7C, Hospital Place, Opp. Four<br>Square Gospel Church, Along Green<br>Valley Hotel, Jos |
| 3750 | PL/0171 | Al Noor Clinic & Maternity              | 5, Madara Junction Angwan Rogo Jos<br>Plateau State                                         |
| 3751 | PL/0172 | Abnira Medical Centre                   | Plot 10078 Hospital place, behind<br>Plateau Hospital, Jos                                  |
| 3752 | PL/0173 | Cottage Hospital, Kwalla                | P.O Box 644, Kwalla Qua'anpan, Jos                                                          |
| 3753 | PL/0174 | General Hospital                        | Mangu, Pankshin Road                                                                        |
| 3754 | PL/0175 | Wase Cottage Hopital                    | Wase Town, Garkawa Rd                                                                       |
| 3755 | PL/0176 | General Hospital                        | Angware                                                                                     |
| 3756 | PL/0178 | General Hospital, Dengi                 | Jarmai Rd, Dengi                                                                            |
| 3757 | PL/0179 | General Hospital, Tunkus                | Tunkus Jarmai Rd, Dengi                                                                     |
| 3758 | PL/0180 | General Hospital Jarmai Rd, Tunkus      | Tunkus                                                                                      |
| 3759 | RV/0001 | Olivet Clinic                           | 18 Ede Street, Ogbunabali Street                                                            |
| 3760 | RV/0002 | Olunwa Medical Centre                   | 4 Amadi Ama Road, Trans-Amadi<br>Layout (Rain-Bow Town)                                     |
| 3761 | RV/0003 | Maryland Health Care                    | No.1 Igwuruta Road, Rumuokurushi                                                            |
| 3762 | RV/0004 | Springs Hospital                        | 458, Ikwere Road by Kala B/Stop, Mile<br>5, Diobu                                           |
| 3763 | RV/0005 | Sophia Clinic                           | 27 Old Aba Road, Rumuogba, Port<br>Harcourt                                                 |
| 3764 | RV/0006 | Ropheka Specialist Clinic               | 39, Elenwo Street, Rumueme,<br>P/Harcourt                                                   |
| 3765 | RV/0007 | Anchor Hospital                         | km 15 P/H - Aba Expressway                                                                  |

|      |         |                                               |                                                                                                  |
|------|---------|-----------------------------------------------|--------------------------------------------------------------------------------------------------|
| 3766 | RV/0008 | Princess Medical Centre                       | No.7 National Supply Road,<br>Canco/Bewac Junction, Trans-Amadi<br>Industrial Layout, P/Harcourt |
| 3767 | RV/0009 | St. Jude                                      | 40 Elenwo Road (Old Refinery Road)<br>Oil Mill Junction, Rumukwurushi, PH                        |
| 3768 | RV/0010 | New Orlins Clinic                             | 9 Orazi Road, Rumola                                                                             |
| 3769 | RV/0011 | Harley Clinic                                 | 21B Akaninwor Road, Oroazi, Port<br>Harcourt                                                     |
| 3770 | RV/0012 | Fanny Royal Hospital                          | 53 Market Road                                                                                   |
| 3771 | RV/0013 | Family Medical Centre                         | 39 Elelewon Road, Rumuokwurushi                                                                  |
| 3772 | RV/0014 | Tim-Grace Clinic & Maternity                  | 25 Elelewon Road, Off Oil Mil Junction                                                           |
| 3773 | RV/0015 | Eddy Medical Centre                           | 4, Ndoki Lane, Behind 53 Market<br>Road, Rumuomasi, P/H                                          |
| 3774 | RV/0016 | Queens Clinic                                 | 38 Rumuolumini Rd Wimpy Junction                                                                 |
| 3775 | RV/0017 | Ebony Hospital                                | 27 Old Aba Road, Rumuogba -Odio                                                                  |
| 3776 | RV/0019 | Siya Medical Centre                           | 112, Old Aba Road, Rumuobiakani,<br>Port Harcourt                                                |
| 3777 | RV/0020 | St. Jude's Medical Clinic & Maternity         | 4, Bimkol Crescent, G.R.A. Phase Iii                                                             |
| 3778 | RV/0037 | Fanny Royal Hospital                          | 4, Bimkol Crescent G.R.A. Phase III                                                              |
| 3779 | RV/0038 | Aggrey Clinic Ltd.                            | 107 Aggrey Road Rivers                                                                           |
| 3780 | RV/0039 | Odessa Med. Services Ltd.                     | 5 Royal Paragon Hotel Avenue, Iwofe<br>Road, Rivers                                              |
| 3781 | RV/0040 | Meridian Hospitals                            | 21, Ibokwe Street, D.Line                                                                        |
| 3782 | RV/0042 | Ponyx Clinic                                  | 2, Chuku Olunda Street, Off Anon<br>Lodge, by Waterline Junction,<br>Rumukalagbor                |
| 3783 | RV/0043 | Hossana Clinic/ Maternity                     | 33, Abel Jumbo St. Mile 2, P/Harcourt                                                            |
| 3784 | RV/0044 | Destiny Hospital & Maternity                  | 38, Ihediohama Diobu Mile 2,<br>P/Harcourt                                                       |
| 3785 | RV/0045 | Calvary Clinic                                | 7a, Haardy U. Street, Orazi,<br>P/Harcourt                                                       |
| 3786 | RV/0046 | Mercy Clinic & Mat.                           | No.1b Mercy Crescent, G.R.A. Phase<br>4, Behind Liberation Sati                                  |
| 3787 | RV/0047 | University Of Port Harcourt Teaching Hospital | Port Harcourt                                                                                    |
| 3788 | RV/0048 | Braithwaite Memorial Hospital                 | Port Harcourt                                                                                    |
| 3789 | RV/0049 | Ashford And Patrice Clinic Ltd.               | 38 Manila Pepple D. Line, Ph, Rivers<br>State.                                                   |
| 3790 | RV/0050 | Providence Clinic & Maternity                 | 11 Railway Close, D-Line Ph.                                                                     |
| 3791 | RV/0051 | Vita Medical Centre                           | 27, Nsukka Street, Mile1 Diobu,                                                                  |
| 3792 | RV/0052 | Seaside Specialist Surgery                    | 89, VictoriaStreet                                                                               |

|      |         |                                    |                                                                         |
|------|---------|------------------------------------|-------------------------------------------------------------------------|
| 3793 | RV/0054 | Nobsams Clinics                    | 44 Trans Amadi Industrial Layout, Oginigba                              |
| 3794 | RV/0079 | Christ The King Hospital           | 145 Old Aba/P.H Road, Mbano Camp, Oyigbo, Rivers State                  |
| 3795 | RV/0080 | St. Mary's Hospital & Maternity    | 5, Estate Road, Woji                                                    |
| 3796 | RV/0081 | Teme Hospital Ltd                  | 10, New Hospital Lane                                                   |
| 3797 | RV/0082 | Triumph Hospital                   | 2, Estate Road Off Aba Road, Rumuogba                                   |
| 3798 | RV/0084 | Kez Clinic                         | 16, Chief Wopara Street, Rumuomasi                                      |
| 3799 | RV/0085 | Empire Specialist Clinic & Trauma  | 19, Echinwo, Elekahia                                                   |
| 3800 | RV/0086 | Alma Hospital                      | 15, Wani Street, Oroworukwo                                             |
| 3801 | RV/0087 | Acron Medical Consultants          | 1, Acron Drive, Behind Plot 28, Stadium Rd, GRA Phase IV, Port Harcourt |
| 3802 | RV/0088 | First Rivers Hospital              | 250a Ph/Aba Expressway                                                  |
| 3803 | RV/0089 | Sonabel Medical Centre             | 14 Owabie Road, Mile 4 Rumueme                                          |
| 3804 | RV/0090 | New Mile One Hospital              | 15 Emenike Street, Mile 1 Diobu                                         |
| 3805 | RV/0091 | Valentine Hospitals                | Plot B2, Opp. 20 Forces Av. Old Gra                                     |
| 3806 | RV/0092 | Rivon Clinic                       | Aba/Ph Expressway, Genesis Junction                                     |
| 3807 | RV/0093 | St. Catherines Specialist Clinic   | 17b Ahiamakara Road, By Nwaya Junction, Trans-Amadi                     |
| 3808 | RV/0094 | Pristine Med. Consultant           | 7 Nwviuke Rd., Off 125 Okporo Rd., Rumuogba                             |
| 3809 | RV/0095 | Sapiens Clinic                     | 2a Mini Ezekwu Street, Off Okporo Rd., Rumuogba                         |
| 3810 | RV/0096 | St. Patrick Hospital               | 3 Ogbunabali Street                                                     |
| 3811 | RV/0097 | Alphonso Hospital                  | Amadi Bus Stop, Along Refinery Rd., Elemenwon                           |
| 3812 | RV/0098 | Mount Hermon Medical Centre        | Plot 12 NTA/Choba Road near NTA Station, Port Harcourt                  |
| 3813 | RV/0099 | Morning Star Hospital              | 19 Isiokpo Street, D/Line                                               |
| 3814 | RV/0100 | Caprin Hospital                    | 4, Igwuruta Road, Eneka, Port Harcourt                                  |
| 3815 | RV/0101 | Woji Cottage Hospital              | Accon Road, Woji Town, Rivers State                                     |
| 3816 | RV/0102 | Palmers Hospital & Mat. Home       | 5/7 Agip Road Rumueme                                                   |
| 3817 | RV/0103 | Cresthill Medical Centre           | 2a Uyo Street Rumueomasi                                                |
| 3818 | RV/0104 | St. Martins Hospital               | 21 Stadium Road Port Harcourt                                           |
| 3819 | RV/0106 | Halten Clinic                      | 11, Agudama Street, D/Line                                              |
| 3820 | RV/0108 | Carmel Clinic                      | 3, Eleworks Drive, Rumuibekwe                                           |
| 3821 | RV/0110 | Ansett Diagnostic Hospital Limited | 9, New Layout Drive, Oginigba Town, Trans-Amadi Industrial Layout       |
| 3822 | RV/0209 | Hopeville Specialist Hospital      | Elijbolo-Eneka Road, Off New Airport Road, Elioju                       |
| 3823 | RV/0210 | Pamo Clinics & Hospital Ltd.       | 300 Aba Rd., Rumuomasi                                                  |

|      |         |                                              |                                                                      |
|------|---------|----------------------------------------------|----------------------------------------------------------------------|
| 3824 | RV/0211 | Bosom Hospital                               | 6, Akaniwo St, Off Eligbam Rd.                                       |
| 3825 | RV/0212 | Cumi Medical Centre                          | 3, Endless Road, Off Elitor Rd, Woji                                 |
| 3826 | RV/0213 | Marina Hospital                              | 16 Akwa St, Off 35 Aba Rd, By Savannah Bank                          |
| 3827 | RV/0214 | Lifetime Medical Centre                      | 1A Worukwo St, Waterline, off Olusegun Obasanjo Rd.                  |
| 3828 | RV/0215 | Immanuel Clinic                              | 4, Nkanwa Lane, off NTA Rd Rumnokuta                                 |
| 3829 | RV/0216 | Jeconiah Children's Clinic                   | 4, Okoroji Lane, D/Line                                              |
| 3830 | RV/0218 | Nigeria Customs Service Med. Centre          | Nigeria Customs Service Medical Centre Port Harcourt-1, Rivers State |
| 3831 | RV/0219 | Nigeria Customs Service Clinic               | Onne Port II, Port Harcourt                                          |
| 3832 | RV/0220 | Military Hospital, P/Harcourt                | Port Harcourt, Rivers State                                          |
| 3833 | RV/0221 | 97 SOG Medical Centre                        | NAF Base Port Harcourt                                               |
| 3834 | RV/0224 | Garrison Clinics                             | 10, Udom Street, D-Line, Port Harcourt.                              |
| 3835 | RV/0226 | Castle Clinics                               | 7B Shell Location Road, Rumuadaolu, Off 42 Rumuola Rd., P/H          |
| 3836 | RV/0233 | 2 Bde MC Port Harcourt                       | Port Harcourt, Rivers State                                          |
| 3837 | RV/0234 | 2 Bn MRS Port Harcourt                       | Port Harcourt, Rivers State                                          |
| 3838 | RV/0235 | 73 Bn MRS Elele                              | Elele, Rivers State                                                  |
| 3839 | RV/0236 | 343 AR MRS Elele                             | Elele, Rivers State                                                  |
| 3840 | RV/0237 | Cottage Hospital/Comprehensive Health Centre | Rivers State Police Command, Rivers State                            |
| 3841 | RV/0238 | Navy Medical Centre - Borokin                | Borokin, Port Harcourt, Rivers State                                 |
| 3842 | RV/0239 | Navy Medical Centre - Onne                   | Onne, Port Harcourt, Rivers State                                    |
| 3843 | RV/0240 | Sick bay NNS PATHFINDER                      | Port Harcourt, Rivers State                                          |
| 3844 | RV/0241 | Precious Life Medical Centre                 | 4 Okorodo street D/line                                              |
| 3845 | RV/0242 | Sondel Clinic And Maternity                  | Plot 12 Phase 1 Borikiri Residential layout                          |
| 3846 | RV/0243 | St Michael's Clinic                          | 4th Street, Block 4 Elekaha Housing Estate                           |
| 3847 | RV/0244 | Divine Grace Clinic/Maternity                | 21 Eljiji Road, Off Woji Road , P/Harcourt                           |
| 3848 | RV/0245 | Udo PolyClinics                              | 9/10 Chief Ejim""s Street Rumubiakani P/H                            |
| 3849 | RV/0246 | Datta Medical Centre                         | 21A Woji Road, Off Old Aba Road, P/H                                 |
| 3850 | RV/0247 | Higgwe Memorial Hospital                     | 644 Ikwerre Road Rumuokoro P/H                                       |
| 3851 | RV/0249 | Jehovah Raphas's Clinic                      | 7 Elemenwo Street, Off market Road, Rumuomasi                        |
| 3852 | RV/0250 | Eli Johnson Specialist Hospital              | 13 Bori Road, Rumuibekwe Housing Estate, P/H                         |
| 3853 | RV/0251 | Health Fountains Hospital                    | NTA/Uniport Road , Ozuoba, P/H                                       |
| 3854 | RV/0252 | The Riverside Clinic                         | 21 Harbour Road , P/H                                                |
| 3855 | RV/0253 | Summit Clinic                                | 17 Omoku Street, D/line, P/H                                         |

|      |         |                                         |                                                                                                              |
|------|---------|-----------------------------------------|--------------------------------------------------------------------------------------------------------------|
| 3856 | RV/0254 | Daily Spring Hospital Ltd               | 11 Rumuigbo Street, Old GRA, P/H                                                                             |
| 3857 | RV/0255 | Silvia Specialist Clinic/Maternity      | 6 Circular Road, Phase 2 Presidential Estate                                                                 |
| 3858 | RV/0256 | El- Bene Hospital                       | 5 El Bene Close, Off Ada George Road Rumuchiorlu Street, by Open Doors Church Junction, Rumueme, Mile 4, P/H |
| 3859 | RV/0257 | Seiyefa Clinic                          | 11 Harold Wilson Drive , Borikiri, P/H                                                                       |
| 3860 | RV/0258 | Heart Health Medical Services           | 14 Omoku Street, D/line, P/H                                                                                 |
| 3861 | RV/0260 | Hope Clinics                            | 3/4 Wokogoloma Street, Waterline, P/H                                                                        |
| 3862 | RV/0261 | Krisany Medical Services                | 5B Asinobi/Agudama Street, D/line, P/H                                                                       |
| 3863 | RV/0262 | Metroplitan Clinic                      | 2nd Avenue, Federal Housing Estate Mile 4, Agip, Rumueme                                                     |
| 3864 | RV/0263 | Atinu Critical Care Hospital            | Old Refinery Road , P/H                                                                                      |
| 3865 | RV/0264 | Sylverlene Clinic And Maternity         | 80D Igwuruta Road ,East/West Road Junction Opp Tank, Rumukwurushi                                            |
| 3866 | RV/0265 | Promise Land Clinic                     | 4 Bende Street, Rumuomas, i P/H                                                                              |
| 3867 | RV/0267 | Salem Hospital                          | 16 Location Road, Oyigbo, P/H                                                                                |
| 3868 | RV/0350 | DSS Clinic                              | Port Harcourt, Rivers State                                                                                  |
| 3869 | RV/0351 | CRI Medi Clinic                         | Plot 80A Second Avenue, Along Dr. Peter Odili Street, P/Harcourt                                             |
| 3870 | RV/0352 | Omoku Clinic                            | Fed. Col. of Education Technical, River State                                                                |
| 3871 | RV/0353 | Bethsaida Clinic & Maternity            | 21, Pipeline Satelite Town, Oyibo, Rivers State                                                              |
| 3872 | RV/0354 | Gbeye Clinic & Maternity                | 16 Ahoada road Omoku                                                                                         |
| 3873 | RV/0355 | Gbeye Clinic & Maternity                | 36 Umuzhi street, Ahoada                                                                                     |
| 3874 | RV/0356 | Life Care Medical Centre                | 3 Azikiwe street Mile 11 Diobu P/Harcourt                                                                    |
| 3875 | RV/0357 | Life Clinics Medical Centre             | 15 Uyo street, Mile 1 Diobu P/Harcourt                                                                       |
| 3876 | RV/0358 | Pamax Hospital Ltd                      | Isiokpo                                                                                                      |
| 3877 | RV/0359 | Rehoboth Specialist Hospital            | 2 Winners' way off Afam str, D-line P/Harcourt                                                               |
| 3878 | RV/0360 | Ridcol Clinic & Maternity               | 26 Emekuku str, D- line P/Harcourt                                                                           |
| 3879 | RV/0361 | TRUVINE SPECIALIST CLINIC               | 6 OHIAMINI RD, BEHIND COLL OF ARTS & SCI OFF R/OLA P/HARCOURT                                                |
| 3880 | RV/0372 | Family Care Clinic                      | 15 Potts Johnson Street, Port Harcourt                                                                       |
| 3881 | RV/0376 | SHAMAKOP HOSPITAL & MEDICAL CONSULTANTS | 5B ABEOKUTA STREET D LINE PORT HARCOURT                                                                      |

|      |         |                                                         |                                                                                           |
|------|---------|---------------------------------------------------------|-------------------------------------------------------------------------------------------|
| 3882 | RV/0377 | Nigerian Navy Ship Yard                                 | Port Harcourt                                                                             |
| 3883 | RV/0378 | The Shield Clinics                                      | Plot 4 Close D, Peace Estate, Trans Woji Road, Port Harcourt                              |
| 3884 | RV/0381 | Adanta Children`s Hospital                              | 44 Evo Road GRA Phase2, Port Harcourt Rivers State                                        |
| 3885 | RV/0382 | Aviation Medical Clinics                                | Port Harcourt Airport, Port Harcourt River State                                          |
| 3886 | RV/0383 | Nedal Specialist Clinic                                 | Rumuekini/Rumuosi Junction-Along East West Road Akpor Rivers State                        |
| 3887 | RV/0385 | Railway Clinic                                          | NRC ,Port Harcourt Rivers State                                                           |
| 3888 | RV/0386 | Harryland Medical Centre                                | No 4,St.Mark`s Rd ,Off U.B.E Junction, Borikiri Sandfill Area, Port Harcourt, River State |
| 3889 | RV/0387 | University of Port Harcourt (Lulu Briggs Health Centre) | University of Port Harcourt                                                               |
| 3890 | RV/0388 | Life Line Clinic                                        | 30 Rumunduru RD, Eliowhani Kingdom ,Port Harcourt Rivers State                            |
| 3891 | RV/0389 | Paragon Clinics And Imaging                             | 96 Stadium Road, Port Harcourt River State                                                |
| 3892 | RV/0390 | Noble Medical Consultants &Fertility Hospital           | No.1 Bloom breed School Road Mgbuoba Opp. NTA Gate Rivers State                           |
| 3893 | RV/0391 | Health Of The Sick Hospital                             | 65/67 Nkpogu RD, Trans Amadi, Port Harcourt River State                                   |
| 3894 | RV/0392 | Kendox Medical Services                                 | No 7,Moses Chinda Avenue, Off 194 Elemenwo Port Harcourt Rivers State                     |
| 3895 | RV/0393 | St. Mary`s Clinic                                       | Lane 2,Block 4,Aggrey Rd Housing Est. Port Harcourt River State                           |
| 3896 | RV/0394 | Goshen Clinic And Maternity                             | Close 8,No 8, Off Circular Road Elekahia Housing Estate, Port Harcourt                    |
| 3897 | RV/0395 | Jose Vital Hospital Limited                             | Plot 19,East West RD, By Rumuokoro Near St. Jude Catholic Church, Port Harcourt           |
| 3898 | RV/0396 | Foundation Clinic                                       | No 1,Foundation Clinic Off Palace Road Omoku Rivers State                                 |
| 3899 | RV/0397 | Corban Medical LTD                                      | Echichinwo RD/Elekaha Estate Opp. Gov`t.                                                  |
| 3900 | RV/0398 | Danferd Specialist Clinic                               | 246,Ada George Road, Opposite Romans Filling Station By Okuton Junction River State       |
| 3901 | RV/0399 | Gold Trust Clinics                                      | 2,Chief Benson Street Off Rumuola Road, Port Harcourt Rivers State                        |
| 3902 | RV/0400 | Shammar Christian Hospital                              | Plot 16 Block 33 Woji Estate, Port Harcourt                                               |

|      |         |                                       |                                                                                                                |
|------|---------|---------------------------------------|----------------------------------------------------------------------------------------------------------------|
| 3903 | RV/0401 | Chiji-Man Specialist Hospital         | 10,Ovim Street, Mile 3 Diobu, Port Harcourt River State                                                        |
| 3904 | RV/0402 | Atlantic Medical Center               | 76c Emekuku Street/Line, Port Harcourt, Rivers State                                                           |
| 3905 | RV/0403 | Spring Rose Hospital                  | No.22 Rumuagbola Road Port Harcourt River State                                                                |
| 3906 | RV/0404 | El-Joe Dam Hospital                   | Off Shell Location Road, Mgbuoba, By Four Square Gospel Church Port Harcourt Rivers State                      |
| 3907 | RV/0405 | Krystal Clinics                       | 8 Jetty Road Abuloma Rivers State                                                                              |
| 3908 | RV/0406 | St. Anthony`s J.C Clinic              | 42,School Road Elelenwo Girls Secondary School),Elelenwo, Port Harcourt                                        |
| 3909 | RV/0407 | Life Forte Specialist Hospital        | 3,Oluwosu Street, Off Ude Road Rumuollumeni, Port Harcourt Rivers State                                        |
| 3910 | RV/0408 | Hilton Clinics                        | No 2 Ejekwu Willie Close, Opp. Silver Spoon Hotel Ada George By Wimpey Road, Mile 4,Port Harcourt Rivers State |
| 3911 | RV/0409 | Pearl Clinics & Maternity             | 4,Manilla Pepple Street, D/Line, Port Harcourt River State                                                     |
| 3912 | RV/0410 | Okpeden Medical Center                | 12 Omoku Road, Ahoada Rivers State                                                                             |
| 3913 | RV/0411 | Phenix Clinics                        | 21 Nnewi (Kolo) Street Off Abakiliki Road By Educational B/Stop Mile 1 Diobu, Port Harcourt Rivers State       |
| 3914 | RV/0412 | Ada Clinic                            | Plot 64B Circular Road, Federal Housing Estate, Trans Amadi Port Harcourt Rivers State                         |
| 3915 | RV/0413 | Divine Grace Hospital LTD             | 28B,Seaside Rd, Oyigbo, Port Harcourt Rivers State                                                             |
| 3916 | RV/0414 | Health Wise Hospital                  | No 3,Benin Street-Line Off 27 Aba Road By Oando Filling Station, Port Harcourt Rivers State                    |
| 3917 | RV/0424 | Grace And Mercy Clinic LTD            | 25B, Ilom Street, Off Woji Rd., Port Harcourt, Rivers State                                                    |
| 3918 | RV/0427 | Cedar Trust Model Clinics & Maternity | 33,Eneka-Igbo-Etchee Road,Off 1st Market R/About, Enaka Port-Harcourt Rivers State                             |
| 3919 | RV/0428 | Military Hospital Port-Harcourt       | Aba Road Port-Harcourt, Rivers state                                                                           |
| 3920 | RV/0429 | Phoenix Medical Consult               | 3, Igboukwu Close, By 1st Artillery Bus Stop ,Aba Road, Port- Harcourt                                         |
| 3921 | RV/0430 | Cova Care Ltd                         | 8, Main Street, Off Farm Road 2, Off G.U Ake Road, Eliozu. Rivers State                                        |

|      |         |                                                        |                                                                                            |
|------|---------|--------------------------------------------------------|--------------------------------------------------------------------------------------------|
| 3922 | RV/0431 | Sophike Medical Centre                                 | Plot 9, Road 7, Federal Housing Estate, Off Peter Odili Road, Ports-Harcourt. Rivers State |
| 3923 | RV/0433 | Wulzi Specialist Hospital                              | 117, Airport Road, Igwuruta- Ali, Greater Port-Harcourt, Rivers State.                     |
| 3924 | RV/0434 | Ell-Specialist Hospitals Limited                       | 7, Umuechem Street, D/Line, Port-Harcourt. Rivers State                                    |
| 3925 | RV/0435 | Calvary Clinic                                         | 10, Miniokpobiri Street, Okpooro Road, By Mama B Junction, Port –                          |
| 3926 | RV/0436 | Gbeye Hospital & Maternity                             | 4, Destiny Street, Of Eliopranwo Road, Off Ada George Road, Port- Harcourt. Rivers State   |
| 3927 | RV/0437 | Mina's Urological/Specialist Hospital Ltd              | House 25, Road 6, Freedom Estate, Rukpokwu, Port-Harcourt. Rivers State                    |
| 3928 | RV/0438 | Nigerian Navy Basic Training School- Sick Bay          | Nigerian Basic Training School, Onne, Rivers State                                         |
| 3929 | RV/0439 | Nimley Clinic                                          | 17, Churchill Road, Creek Road Extension, Port-Harcourt. Rivers State                      |
| 3930 | RV/0440 | Bennod International Hospital Limited                  | 28 Ada George Road, Port-Harcourt -. Rivers State                                          |
| 3931 | RV/0441 | Channel Clinic & Hospital Limited                      | 10, Hospital Road, Bonny, Rivers State                                                     |
| 3932 | RV/0443 | Magnum Nuvon Medical Centre Ltd                        | 18, Canon Ndu Street, Elemenwo, Rivers State                                               |
| 3933 | RV/0446 | Federal Polytechnic Of Oil and Gas Health Centre Bonny | Abalamable Town, Bonny Island, Rivers State                                                |
| 3934 | RV/0447 | Eastlans Specialist Hospital Limited                   | 4, Worlu Street, Rumuigbo, Port-Harcourt, Rivers State                                     |
| 3935 | RV/0451 | Abundant Health Specialist Ltd                         | 9, Aleruchi Close, Off No.5 Ada George Road, Port-Harcourt Rivers State                    |
| 3936 | RV/0452 | Greencare Medical Consultants Ltd                      | 15, East West Worlu Road (Baba), Off Obiwali Road, Rumigbo, Port-Harcourt , Rivers State   |
| 3937 | RV/0453 | Save A Life Mission Hospital                           | 38,Uyo St. Off Stadium Road, Rumuomasi, Port-Harcourt, Rivers State                        |
| 3938 | RV/0454 | Richimok Hospital Limited                              | 102,Nta/Choba Road, Port-Harcourt, Rivers State                                            |
| 3939 | RV/0456 | Ofure Specialist Clinic                                | Plot 65,Okporo Rd, Behind Eco bank, Off Artillery, Port-Harcourt, Rivers State             |
| 3940 | RV/0457 | Westhill Medical Services Ltd                          | 4,Wogu Street ,Off Omoku Rd, D/Line Port-Harcourt Rivers State                             |
| 3941 | RV/0458 | St. Vincent Hospital                                   | 1a,St.Vincent Close, Ogbogoro Road, Rumuoluneni, Port-Harcourt, Rivers State               |



|      |         |                                                 |                                                                                   |
|------|---------|-------------------------------------------------|-----------------------------------------------------------------------------------|
| 3942 | RV/0459 | Althahaus Medical Centre                        | 122c,General Driyai Street, GRA, Port-Harcourt, Rivers State                      |
| 3943 | RV/0460 | Bethesda Family Hospital                        | Plot 18 (Opp. Apostolic Army Church) Eastern By-Pass, Port-Harcourt, Rivers State |
| 3944 | RV/0461 | Beracca Eye Clinic Ltd                          | 9,Rumuogba Estate, Rumuogba, Port-Harcourt ,Rivers State                          |
| 3945 | RV/0462 | Ultimate Specialist Clinic & Hospital           | 67,Royal Avenue, Off Odili/Okuru/Abuloma Link Road, Port-Harcourt, Rivers State   |
| 3946 | RV/0464 | International Trauma & Critical Care Centre Ltd | 11, Emenike Street, Mile One Port-Harcourt, Rivers State                          |
| 3947 | RV/0466 | NNPC Medical Services                           | NNPC-Elеме/Moscow Road, Port-Harcourt Rivers State                                |
| 3948 | SO/0002 | Sokoto Clinic                                   | Sokoto                                                                            |
| 3949 | SO/0004 | Shepherd Specialist Clinic                      | No. 32 Zaria Rd. Ung. Rogo Area                                                   |
| 3950 | SO/0005 | Sahel Specialist Hospital                       | Sultan Abubakar Rd. Sokoto                                                        |
| 3951 | SO/0006 | Specialist Hospital                             | Abdullahi Fodiyo Road, Sokoto                                                     |
| 3952 | SO/0007 | Hussaini Medical Center                         | Emir Yahaya Rd. Sokoto                                                            |
| 3953 | SO/0008 | Lafiya Clinic & Health Services                 | 25, Shuni Road, Mararaba, Sokoto                                                  |
| 3954 | SO/0009 | Karaye Hospital                                 | Ali Akilu Rd. Sokoto                                                              |
| 3955 | SO/0010 | Usman Danfodio University Teaching Hospital     | Behind Standard Trust Bank, Kano Rd. Sokoto                                       |
| 3956 | SO/0011 | Al-Fijir Specialist Medical Center              | No. 32 Zaria Road, Unguwan Rogo Area                                              |
| 3957 | SO/0031 | 1 Bde MC, Sokoto                                | Sokoto, Sokoto State                                                              |
| 3958 | SO/0033 | Free Hand Specialist Hospital                   | 31, Shuni Rd, Sokoto                                                              |
| 3959 | SO/0037 | Usman Danfodio University Health Services       | University main campus, Sokoto                                                    |
| 3960 | SO/0038 | DSS Clinic                                      | Sokoto, Sokoto State                                                              |
| 3961 | SO/0039 | Hamdala Medical Centre                          | 47 Emir Yahaya Road, Sokoto                                                       |
| 3962 | SO/0040 | Liberty Clinic                                  | 11, Gummi Road, Hajiya Halima Estate, Sokoto                                      |
| 3963 | SO/0041 | Police Clinic                                   | Sokoto                                                                            |
| 3964 | SO/0042 | Al-Umma Hospital                                | Aliyu Gida Road, Sokoto South                                                     |
| 3965 | SO/0043 | General Hospital, Kebbe                         | Kebbe                                                                             |
| 3966 | SO/0044 | Primary Health Care Centre, Kuchi               | Kebbe                                                                             |
| 3967 | SO/0045 | Primary Health Clinic, Sabon Birnin             | Sabon Birnin                                                                      |
| 3968 | SO/0046 | Sangerawa Dispensary                            | Sabon Birnin                                                                      |
| 3969 | SO/0047 | Tsamaye Dispensary                              | Sabon Birnin                                                                      |
| 3970 | SO/0048 | Unguwar Lalle Upgrade Dispensary                | Sabon Birnin                                                                      |
| 3971 | SO/0049 | Laginge Dispensary                              | Sabon Birnin                                                                      |
| 3972 | SO/0050 | Makuwana Dispensary                             | Sabon Birnin                                                                      |
| 3973 | SO/0051 | Teke Dispensary                                 | Sabon Birnin                                                                      |
| 3974 | SO/0052 | Kwatsal Dispensary                              | Sabon Birnin                                                                      |
| 3975 | SO/0053 | Gatawa Model Primary Health Clinic              | Sabon Birnin                                                                      |
| 3976 | SO/0054 | Kalgo Dispensary                                | Sabon Birnin                                                                      |
| 3977 | SO/0055 | Tara Dispensary                                 | Sabon Birnin                                                                      |
| 3978 | SO/0056 | Kunawa Dispensary                               | Sabon Birnin                                                                      |
| 3979 | SO/0057 | Magarau Dispensary                              | Sabon Birnin                                                                      |

|      |         |                                           |                                                                      |
|------|---------|-------------------------------------------|----------------------------------------------------------------------|
| 3980 | SO/0058 | Tagirke Dispensary                        | Sabon Birnin                                                         |
| 3981 | SO/0059 | Rambadawa Dispensary                      | Sabon Birnin                                                         |
| 3982 | SO/0060 | Kyara Dispensary                          | Sabon Birnin                                                         |
| 3983 | SO/0061 | Bachaka Dispensary                        | Sabon Birnin                                                         |
| 3984 | SO/0062 | Dankura Dispensary                        | Sabon Birnin                                                         |
| 3985 | SO/0063 | Dama Dispensary                           | Sabon Birnin                                                         |
| 3986 | SO/0064 | Kalage Dispensary                         | Sabon Birnin                                                         |
| 3987 | SO/0065 | Yarbulutu Dispensary                      | Sabon Birnin                                                         |
| 3988 | SO/0066 | Kiratatawa Dispensary                     | Sabon Birnin                                                         |
| 3989 | SO/0067 | Garinidi Dispensary                       | Sabon Birnin                                                         |
| 3990 | SO/0068 | Karuwa Dispensary                         | Sabon Birnin                                                         |
| 3991 | SO/0069 | Burkusima Dispensary                      | Sabon Birnin                                                         |
| 3992 | SO/0070 | Gangara Dispensary                        | Sabon Birnin                                                         |
| 3993 | SO/0071 | Magira Dispensary                         | Sabon Birnin                                                         |
| 3994 | SO/0072 | An-Nisha Clinic                           | 2, Garba Mohammed Rd, opp School of Works, Runjin Sabo, Sokoto       |
| 3995 | SO/0073 | Ubandoma Socialist Clinic                 | # 24, Besse Road, Rujin Sambo Area, Sokoto                           |
| 3996 | SO/0075 | State Specialist Hospital                 | Sultan Abubakar Road, Sokoto, Sokoto State                           |
| 3997 | SO/0077 | Zefafi Women Specialist Hospital          | No. 1 Maikahon Karo Road Beside Giginya Stadium Sokoto, Sokoto State |
| 3998 | SO/0078 | Iman Hospital                             | No. 13 Dankoro Road Runjin Sambo Sokoto, Sokoto State                |
| 3999 | SO/0079 | Wali Bako Specialist Medical Center       | 2 Dange Road, Behind GGC, Sokoto                                     |
| 4000 | SO/0080 | Caliphate Multispecialty Hospital         | No. 2 Nagwamatse Road, Sokoto, Sokoto State.                         |
| 4001 | SO/0082 | Alheri Medical And Consultancy Clinics    | Federal Housing Estate Sokoto, Sokoto State.                         |
| 4002 | TR/0001 | Jinya Medical Centre                      | 3c Gombe Road, Jalingo                                               |
| 4003 | TR/0003 | Biyama Hospital                           | Donga Road, Wukari                                                   |
| 4004 | TR/0004 | El-Duniya Clinic and Convalescent Limited | 14, Borno Road, Near State Low Cost, Jalingo                         |
| 4005 | TR/0005 | Gateway Hospital                          | No. 3c Gombi Road, Near State Low Cost, Jalingo                      |
| 4006 | TR/0006 | Courage Hospital, Mayo Renowo Crescent    | Mayo Renowo Crescent, Behind State Legislative Qtrs, Jalingo         |
| 4007 | TR/0007 | General Hospital, Wukari                  | Wukari                                                               |
| 4008 | TR/0008 | Gongola Hospital                          | Old Bantaje Road, Wukari                                             |
| 4009 | TR/0009 | Federal Medical Centre - Jalingo          | No. 29 Idris Makeri Street, Jalingo                                  |
| 4010 | TR/0010 | Rafu Clinic                               | Katsina Ala Road, Wukari                                             |
| 4011 | TR/0011 | Bethel Hospital                           | Ibi Road, GRA, Wukari                                                |
| 4012 | TR/0012 | First Referral Hospital                   | Mutum Biyu                                                           |
| 4013 | TR/0013 | General Hospital, Zing                    | Bitaka Road, Zing                                                    |
| 4014 | TR/0014 | Abdul Medical Centre                      | No. 5 Donga Road, Jalingo                                            |
| 4015 | TR/0025 | 3 Bn MRS Takum                            | Takum, Taraba State                                                  |
| 4016 | TR/0026 | Rapha Hospital                            | Katsina-ala Road, Takum                                              |

|      |         |                                                  |                                                                    |
|------|---------|--------------------------------------------------|--------------------------------------------------------------------|
| 4017 | TR/0028 | Jonas clinics & Maternity                        | No 1, Old Garage Round-about, Takum                                |
| 4018 | TR/0029 | Niger Clinic                                     | Opp water Board, Yakum                                             |
| 4019 | TR/0034 | DSS Clinic                                       | Jalingo, Taraba State                                              |
| 4020 | TR/0035 | Police Clinics, Taraba                           | Taraba State                                                       |
| 4021 | TR/0037 | General Hospital, Bali                           | Bali, Taraba State                                                 |
| 4022 | TR/0038 | General Hospital, Gembu                          | Gembu, Taraba State                                                |
| 4023 | TR/0039 | 20 BN MRS, Jalingo                               | Serti                                                              |
| 4024 | TR/0041 | Totus Hospital & Maternity Limited               | Along Jalingo/Wukari Road near UBA, Mutum Biyu                     |
| 4025 | TR/0043 | Kwararafa Hospital & Maternity                   | 8, After Zion Church, Along Air Strip, Wukari                      |
| 4026 | TR/0044 | Danny's Wellness Clinics Ltd                     | Presidential Lodge Area, Specialist Hospital Road, Jalingo         |
| 4027 | TR/0045 | Taraba Specialist Hospital                       | 1, Jolly Nyame Way, Off By-Pass, Jalingo Taraba state              |
| 4028 | TR/0046 | Sauki Hospital & Maternity                       | NO. 8, Near Zion Baptist Church Sabon Gari, Jalingo, Taraba State. |
| 4029 | TR/0047 | First Referral Hospital.                         | Serti Taraba State                                                 |
| 4030 | TR/0048 | University Health Services Centre                | Federal University Wukari, Taraba State                            |
| 4031 | TR/0049 | First Nasarawo Hospital                          | Sintali B Jalingo                                                  |
| 4032 | TR/0050 | Kwenas Clinic & Maternity                        | Near Old Garage, Wukari                                            |
| 4033 | TR/0051 | Federal Polytechnic Bali Medical Centre          | Federal Polytechnic Bali                                           |
| 4034 | TR/0052 | College Of Agriculture, Jalingo Medical Hospital | College Of Agriculture Jalingo, Taraba State                       |
| 4035 | TR/0054 | Maitala Trust Medical Services Ltd               | Off Former Jankada Hospital Jalingo Taraba State                   |
| 4036 | TR/0055 | Waritoma - Rahila Hospital                       | Opp. Shagari Low Cost, Along Takum Road, Wukari Taraba State       |
| 4037 | TR/0056 | Goggoji Memorial Clinic                          | Behind Federal Science T. College Jalingo, Taraba State            |
| 4038 | TR/0057 | Taraba State Polytechnic Campus Clinic           | Jalingo-Wukari Road, Jalingo, Taraba State.                        |
| 4039 | TR/0058 | General Hospital Takum                           | Takum, Taraba State                                                |
| 4040 | TR/0059 | Zahra Clinic                                     | Adjacent Mastala Adamawa Street Jalingo, Taraba State.             |
| 4041 | YB/0001 | Bade Medical Clinic                              | Sabon Gari Ward, Gashua                                            |
| 4042 | YB/0002 | General Hospital, Gashua                         | Gashua, Along Nguru Rd., Gashua                                    |
| 4043 | YB/0004 | General Sani Abacha Specialist Hospital          | Along Gujba Rd., Damaturu                                          |
| 4044 | YB/0005 | Yobe Medical Center                              | No.13 Gashua Road, Damaturu                                        |
| 4045 | YB/0006 | Borno Medical Center                             | Along Gashua Road, Damaturu                                        |
| 4046 | YB/0007 | Dr(Mrs) Maryam Abacha Fsp                        | Gashua Rd., Damaturu                                               |
| 4047 | YB/0013 | General Hospital Dapchi                          | Dapchi, Ajari Ward                                                 |
| 4048 | YB/0016 | General Hospital Buni-Yadi                       | Along Biu Road, Buni-Yadi                                          |
| 4049 | YB/0017 | Federal Medical Center, Nguru                    | Along Gashua Rd.                                                   |
| 4050 | YB/0019 | General Hospital Potiskum                        | Along Hospital Road                                                |
| 4051 | YB/0020 | Ajiko Medical Center                             | Along Gashua Rd                                                    |
| 4052 | YB/0021 | General Hospital, Geidam                         | Kaigama Road, Geidam                                               |

|      |         |                                         |                                                                     |
|------|---------|-----------------------------------------|---------------------------------------------------------------------|
| 4053 | YB/0022 | Potiskum Medical Clinic                 | No. 166 Mohammed Idriss Way,<br>Potiskum                            |
| 4054 | YB/0026 | 241 Recce Bn MRS Nguru                  | Nguru, Yobe State                                                   |
| 4055 | YB/0030 | DSS Clinic                              | Damaturu, Yobe State                                                |
| 4056 | YB/0031 | Police Clinics, Yobe                    | Yobe State                                                          |
| 4057 | YB/0032 | Federal College Of Education, Potiskum  | Potiskum, Yobe State                                                |
| 4058 | YB/0033 | Federal Polytechnic Clinic              | Damaturu, Yobe State                                                |
| 4059 | YB/0039 | Eva Clinic & Maternity                  | 160 Mohammed Idris Way, Potiskum                                    |
| 4060 | YB/0040 | City Medical Centre                     | Zango Ward, Damaturu                                                |
| 4061 | YB/0042 | Afua Medical Clinic & Maternity         | Boni Yadi along Biu Road                                            |
| 4062 | YB/0044 | General Hospital Damagum                | Potiskum Road Adjacent Fune LGA<br>Secretariat, Damagun, Yobe State |
| 4063 | ZF/0001 | General Hospital, Anka                  | Anka                                                                |
| 4064 | ZF/0002 | General Hospital, Bakura                | Bakura                                                              |
| 4065 | ZF/0004 | Polyclinics & Maternity                 | Hospital Zaria Road, Samaru                                         |
| 4066 | ZF/0005 | Gusau General Hospital - Gusau          | Mortage Area, Gusau                                                 |
| 4067 | ZF/0006 | Daula Hospital & Mat. Home              | K/Namoda Road, Lebin-Lebin                                          |
| 4068 | ZF/0007 | Women & Children Specialist Hospital    | Gusau                                                               |
| 4069 | ZF/0008 | Arewa Hospital                          | Sani Abacha Way                                                     |
| 4070 | ZF/0009 | Gusau Medical Clinic                    | Opp. Govt. House                                                    |
| 4071 | ZF/0017 | General Hospital, Kaura Namoda          | Kaura Namoda                                                        |
| 4072 | ZF/0018 | General Hospital, Maru                  | Maru                                                                |
| 4073 | ZF/0019 | General Hospital, Talata Mafara         | Talata Mafara                                                       |
| 4074 | ZF/0020 | Tsafe General Hospital                  | Hospital Tsafe                                                      |
| 4075 | ZF/0021 | Federal Medical Centre Gusau            | Gusau                                                               |
| 4076 | ZF/0025 | DSS Clinic                              | Gusau, Zamfara State                                                |
| 4077 | ZF/0026 | Police Clinics, Zamfara                 | Zamfara State                                                       |
| 4078 | ZF/0027 | Federal Polytechnic, Kaura Namoda       | Kaura Namoda, Zamfara State                                         |
| 4079 | ZF/0028 | 1 BAD                                   | Gusau                                                               |
| 4080 | ZF/0029 | Yariman Bakura Specialist Hospital      | Kawa Namoda Road, Tudun Wada,<br>Gusau, Zamfara State               |
| 4081 | ZF/0030 | Haske Family Hospital Gusau             | Zaria Road, Along Gusau Hotel Gusau,<br>Zamfara State               |
| 4082 | ZF/0031 | Hilal Specialist Hospital               | 12, Olusegun Obasanjo Drive Gusau,<br>Zamfara State                 |
| 4083 | ZF/0032 | Federal University Gusau Medical Center | Federal University Gusau Campus,<br>Zamfara State                   |

| LGA           | STATE |
|---------------|-------|
| Aba South     | Abia  |
| Aba South     | Abia  |
| Aba South     | Abia  |
| Aba South     | Abia  |
| Aba South     | Abia  |
|               |       |
| Aba South     | Abia  |
| Aba South     | Abia  |
| Aba North     | Abia  |
| Aba North     | Abia  |
| Aba North     | Abia  |
| Umuahia South | Abia  |
|               |       |
| Aba South     | Abia  |
| Aba South     | Abia  |
| Obingwa       | Abia  |
| Aba North     | Abia  |
| Aba South     | Abia  |
| Obingwa       | Abia  |
|               |       |
| Aba North     | Abia  |
| Aba North     | Abia  |
|               |       |
| Aba North     | Abia  |
| Aba North     | Abia  |
|               |       |
| Aba South     | Abia  |
| Aba North     | Abia  |
|               |       |
| Aba South     | Abia  |
|               |       |
| Umuahia North | Abia  |
| Umuahia North | Abia  |
|               |       |
| Aba South     | Abia  |
| Aba North     | Abia  |
|               |       |
| Aba North     | Abia  |
| Aba North     | Abia  |
| Aba North     | Abia  |
|               |       |
| Aba South     | Abia  |
| Aba South     | Abia  |
|               |       |
| Umuahia South | Abia  |
|               |       |
| Umuahia North | Abia  |
| Umuahia North | Abia  |

|               |      |
|---------------|------|
| Osioma        | Abia |
| Aba North     | Abia |
| Umuahia North | Abia |
| Ukwa West     | Abia |
|               |      |
| Aba North     | Abia |
| Aba South     | Abia |
| Umuahia North | Abia |
| Aba North     | Abia |
|               |      |
| Umuahia North | Abia |
|               |      |
| Umuahia South | Abia |
| Umuahia North | Abia |
| Umuahia North | Abia |
| Umuahia North | Abia |
| Aba South     | Abia |
|               |      |
| Ohafia        | Abia |
|               |      |
| Aba South     | Abia |
| Ohafia        | Abia |
|               |      |
| Aba North     | Abia |
|               |      |
| Aba North     | Abia |
|               |      |
| Aba North     | Abia |
| Ukwa East     | Abia |
|               |      |
| Obingwa       | Abia |
|               |      |
| Umuahia North | Abia |
|               |      |
| Aba North     | Abia |
| Umuahia North | Abia |
|               |      |
| Osioma        | Abia |
|               |      |
| Aba South     | Abia |
|               |      |
| Ohafia        | Abia |
|               |      |
| Aba South     | Abia |
|               |      |
| Osioma        | Abia |

|               |         |
|---------------|---------|
| Umuahia North | Abia    |
| Umuahia South | Abia    |
| Aba North     | Abia    |
| Umuahia North | Abia    |
| Aba North     | Abia    |
| Umu - Nneochi | Abia    |
|               |         |
| Osioma        | Abia    |
| Isuikwuato    | Abia    |
|               |         |
| Osioma        | Abia    |
| Umuahia North | Abia    |
| Aba South     | Abia    |
| Aba South     | Abia    |
| Ganye         | Adamawa |
| Mayo - Belwa  | Adamawa |
| Mubi South    | Adamawa |
| Numan         | Adamawa |
| Song          | Adamawa |
| Yola North    | Adamawa |
| Yola North    | Adamawa |
| Yola North    | Adamawa |
|               |         |
| Yola North    | Adamawa |
| Yola North    | Adamawa |
| Yola North    | Adamawa |
| Yola North    | Adamawa |
|               |         |
| Yola North    | Adamawa |
| Yola North    | Adamawa |
|               |         |
| Yola North    | Adamawa |
| Yola North    | Adamawa |
|               |         |
| Yola North    | Adamawa |
| Yola North    | Adamawa |
| Yola South    | Adamawa |
| Yola South    | Adamawa |
| Gombi         | Adamawa |
| Yola South    | Adamawa |
| Mubi South    | Adamawa |

|              |           |
|--------------|-----------|
| Mubi North   | Adamawa   |
| Gombi        | Adamawa   |
| Hong         | Adamawa   |
| Guyuk        | Adamawa   |
| Demsa        | Adamawa   |
| Yola North   | Adamawa   |
| Michika      | Adamawa   |
| Fufore       | Adamawa   |
| Yola North   | Adamawa   |
| Yola South   | Adamawa   |
|              |           |
| Yola North   | Adamawa   |
| Mubi North   | Adamawa   |
| Yola North   | Adamawa   |
| Yola North   | Adamawa   |
| Yola North   | Adamawa   |
|              |           |
| Yola North   | Adamawa   |
| Madagali     | Adamawa   |
| Mubi South   | Adamawa   |
|              |           |
| Yola North   | Adamawa   |
| Mubi South   | Adamawa   |
| Gombi        | Adamawa   |
| Yola North   | Adamawa   |
| Mubi North   | Adamawa   |
|              |           |
| Yola North   | Adamawa   |
| Mayo - Belwa | Adamawa   |
|              |           |
| Yola North   | Adamawa   |
|              |           |
| Yola North   | Adamawa   |
|              |           |
| Yola South   | Adamawa   |
|              |           |
| Yola South   | Adamawa   |
|              |           |
| Yola South   | Adamawa   |
| Numan        | Adamawa   |
|              |           |
| Yola North   | Adamawa   |
|              |           |
| Yola North   | Adamawa   |
| Eket         | Akwa Ibom |
| Eket         | Akwa Ibom |
| Ikot Ekpene  | Akwa Ibom |
| Oron         | Akwa Ibom |
|              |           |
| Uyo          | Akwa Ibom |



|             |           |
|-------------|-----------|
| Uyo         | Akwa Ibom |
| Uyo         | Akwa Ibom |
| Uyo         | Akwa Ibom |
| Uyo         | Akwa Ibom |
| Uyo         | Akwa Ibom |
|             |           |
| Uyo         | Akwa Ibom |
| Uyo         | Akwa Ibom |
| Abak        | Akwa Ibom |
| Uyo         | Akwa Ibom |
|             |           |
| Uyo         | Akwa Ibom |
| Uyo         | Akwa Ibom |
|             |           |
| Uyo         | Akwa Ibom |
| Uyo         | Akwa Ibom |
| Uyo         | Akwa Ibom |
| Uyo         | Akwa Ibom |
|             |           |
| Abak        | Akwa Ibom |
| Uyo         | Akwa Ibom |
|             |           |
| Uyo         | Akwa Ibom |
|             |           |
| Uyo         | Akwa Ibom |
| Uyo         | Akwa Ibom |
| Uyo         | Akwa Ibom |
| Uyo         | Akwa Ibom |
| Uyo         | Akwa Ibom |
| Uyo         | Akwa Ibom |
| Eket        | Akwa Ibom |
|             |           |
| Eket        | Akwa Ibom |
|             |           |
| Uyo         | Akwa Ibom |
| Uyo         | Akwa Ibom |
| Abak        | Akwa Ibom |
|             |           |
| Uyo         | Akwa Ibom |
|             |           |
| Uyo         | Akwa Ibom |
|             |           |
| Oron        | Akwa Ibom |
| Uyo         | Akwa Ibom |
|             |           |
| Ibiono Ibom | Akwa Ibom |
|             |           |
| Uyo         | Akwa Ibom |
|             |           |
| Uyo         | Akwa Ibom |

|               |           |
|---------------|-----------|
| Uyo           | Akwa Ibom |
| Oron          | Akwa Ibom |
| Uyo           | Akwa Ibom |
| Uyo           | Akwa Ibom |
| Ikot Ekpene   | Akwa Ibom |
| Uyo           | Akwa Ibom |
| Uyo           | Akwa Ibom |
| Uyo           | Akwa Ibom |
| Uyo           | Akwa Ibom |
| Uyo           | Akwa Ibom |
| Oron          | Akwa Ibom |
| Uyo           | Akwa Ibom |
| Uyo           | Akwa Ibom |
| Uyo           | Akwa Ibom |
| Essien Udim   | Akwa Ibom |
| Uyo           | Akwa Ibom |
| Eket          | Akwa Ibom |
| Ikot Ekpene   | Akwa Ibom |
| Eket          | Akwa Ibom |
| Uyo           | Akwa Ibom |
| Awka South    | Anambra   |
| Awka South    | Anambra   |
| Awka South    | Anambra   |
| Awka South    | Anambra   |
| Awka South    | Anambra   |
| Awka South    | Anambra   |
| Nnewi North   | Anambra   |
| Onitsha-North | Anambra   |

|                |         |
|----------------|---------|
| Onitsha-North  | Anambra |
| Onitsha-North  | Anambra |
| Onitsha-North  | Anambra |
| Onitsha-North  | Anambra |
| Onitsha -South | Anambra |
| Onitsha -South | Anambra |
| Onitsha -South | Anambra |
| Onitsha -South | Anambra |
| Idemili North  | Anambra |
| Idemili North  | Anambra |
| Idemili North  | Anambra |
| Nnewi North    | Anambra |
| Onitsha -South | Anambra |
| Onitsha-North  | Anambra |
| Anambra East   | Anambra |
| Awka South     | Anambra |
| Onitsha-North  | Anambra |
| Awka South     | Anambra |
| Njikoka        | Anambra |
| Orumba North   | Anambra |
| Aguata         | Anambra |
| Onitsha-North  | Anambra |
| Orumba North   | Anambra |
| Idemili North  | Anambra |
| Nnewi North    | Anambra |
| Nnewi North    | Anambra |
| Nnewi North    | Anambra |

|                |         |
|----------------|---------|
| Nnewi North    | Anambra |
| Anaocha        | Anambra |
| Awka North     | Anambra |
| Orumba South   | Anambra |
| Awka North     | Anambra |
| Orumba North   | Anambra |
| Orumba South   | Anambra |
| Awka South     | Anambra |
| Aguata         | Anambra |
| Idemili North  | Anambra |
| Onitsha -South | Anambra |
| Aguata         | Anambra |
| Onitsha -South | Anambra |
| Onitsha-North  | Anambra |
| Idemili North  | Anambra |
| Awka South     | Anambra |
| Onitsha -South | Anambra |
| Awka South     | Anambra |
| Aguata         | Anambra |
| Onitsha -South | Anambra |
| Awka South     | Anambra |
| Nnewi North    | Anambra |
| Idemili North  | Anambra |
| Orumba South   | Anambra |
| Nnewi North    | Anambra |
| Onitsha-North  | Anambra |
| Idemili North  | Anambra |
| Aguata         | Anambra |
| Awka South     | Anambra |
| Idemili North  | Anambra |
| Onitsha -South | Anambra |
| Aguata         | Anambra |
| Njikoka        | Anambra |
| Aguata         | Anambra |
| Ihala          | Anambra |
| Aguata         | Anambra |

|                |         |
|----------------|---------|
| Awka North     | Anambra |
| Onitsha -South | Anambra |
| Aguata         | Anambra |
| Idemili North  | Anambra |
| Nnewi North    | Anambra |
| Awka South     | Anambra |
| Onitsha -South | Anambra |
| Awka South     | Anambra |
| Awka South     | Anambra |
| Idemili-South  | Anambra |
| Anaocha        | Anambra |
| Aguata         | Anambra |
| Njikoka        | Anambra |
| Awka South     | Anambra |
| Awka South     | Anambra |
| Oyi            | Anambra |
| Aguata         | Anambra |
| Idemili North  | Anambra |
| Ihala          | Anambra |
| Nnewi North    | Anambra |
| Awka South     | Anambra |
| Awka South     | Anambra |
| Njikoka        | Anambra |
| Ogbaru         | Anambra |
| Ogbaru         | Anambra |
| Dunukofia      | Anambra |
| Awka South     | Anambra |
| Onitsha -South | Anambra |

|                |         |
|----------------|---------|
| Njikoka        | Anambra |
| Nnewi North    | Anambra |
| Onitsha-North  | Anambra |
| Anaocha        | Anambra |
| Awka South     | Anambra |
| Orumba South   | Anambra |
| Anaocha        | Anambra |
| Onitsha-North  | Anambra |
| Aguata         | Anambra |
| Awka North     | Anambra |
| Orumba North   | Anambra |
| Onitsha -South | Anambra |
| Dunukofia      | Anambra |
| Ihala          | Anambra |
| Onitsha-North  | Anambra |
| Awka South     | Anambra |
| Awka South     | Anambra |
| Awka South     | Anambra |
| Bauchi         | Bauchi  |
| Bauchi         | Bauchi  |
| Bauchi         | Bauchi  |
| Bauchi         | Bauchi  |
| Bauchi         | Bauchi  |
| Bauchi         | Bauchi  |
| Katagum        | Bauchi  |
| Katagum        | Bauchi  |
| Bauchi         | Bauchi  |
| Bauchi         | Bauchi  |
| Katagum        | Bauchi  |
| Bauchi         | Bauchi  |
| Bauchi         | Bauchi  |

|               |        |
|---------------|--------|
| Bauchi        | Bauchi |
| Bauchi        | Bauchi |
| Bauchi        | Bauchi |
| Bauchi        | Bauchi |
| Bauchi        | Bauchi |
| Bauchi        | Bauchi |
|               |        |
| Bauchi        | Bauchi |
| Bauchi        | Bauchi |
| Ningi         | Bauchi |
| Misau         | Bauchi |
| Shira         | Bauchi |
| Toro          | Bauchi |
| Tafawa Balewa | Bauchi |
| Katagum       | Bauchi |
| Darazo        | Bauchi |
| Dass          | Bauchi |
| Jama'Are      | Bauchi |
| Gamawa        | Bauchi |
| Alkaleri      | Bauchi |
| Itas/Gadau    | Bauchi |
| Bauchi        | Bauchi |
|               |        |
| Alkaleri      | Bauchi |
| Bauchi        | Bauchi |
| Bauchi        | Bauchi |
|               |        |
| Ningi         | Bauchi |
|               |        |
| Ningi         | Bauchi |
| Ganjuwa       | Bauchi |
| Dambam        | Bauchi |
| Yayu          | Bauchi |
| Zaki          | Bauchi |
| Giade         | Bauchi |
| Shira         | Bauchi |
| Katagum       | Bauchi |
|               |        |
| Jama'Are      | Bauchi |
|               |        |
| Bauchi        | Bauchi |
|               |        |
| Bauchi        | Bauchi |
| Ganjuwa       | Bauchi |
| Ningi         | Bauchi |
| Tafawa Balewa | Bauchi |
| Katagum       | Bauchi |
|               |        |
| Bauchi        | Bauchi |
| Katagum       | Bauchi |

|          |        |
|----------|--------|
| Bauchi   | Bauchi |
|          |        |
| Katagum  | Bauchi |
|          |        |
| Bauchi   | Bauchi |
|          |        |
| Bauchi   | Bauchi |
|          |        |
| Bauchi   | Bauchi |
| Ningi    | Bauchi |
| Gboko    | Benue  |
| Gboko    | Benue  |
| Gboko    | Benue  |
| Makurdi  | Benue  |
|          |        |
| Makurdi  | Benue  |
| Makurdi  | Benue  |
| Makurdi  | Benue  |
|          |        |
| Makurdi  | Benue  |
|          |        |
| Makurdi  | Benue  |
| Makurdi  | Benue  |
| Makurdi  | Benue  |
|          |        |
| Makurdi  | Benue  |
|          |        |
| Makurdi  | Benue  |
| Makurdi  | Benue  |
| Makurdi  | Benue  |
|          |        |
| Makurdi  | Benue  |
| Makurdi  | Benue  |
| Otukpo   | Benue  |
|          |        |
| Ogbadibo | Benue  |
| Otukpo   | Benue  |
|          |        |
| Makurdi  | Benue  |
|          |        |
| Makurdi  | Benue  |
| Makurdi  | Benue  |
| Makurdi  | Benue  |
|          |        |
| Makurdi  | Benue  |
| Makurdi  | Benue  |
| Makurdi  | Benue  |



|         |       |
|---------|-------|
| Makurdi | Benue |
|         |       |
| Makurdi | Benue |
|         |       |
| Makurdi | Benue |
| Makurdi | Benue |
| Makurdi | Benue |
| Makurdi | Benue |
| Okpokwu | Benue |
|         |       |
| Otukpo  | Benue |
| Otukpo  | Benue |
| Makurdi | Benue |
| Otukpo  | Benue |
| Okpokwu | Benue |
|         |       |
| Okpokwu | Benue |
|         |       |
| Gboko   | Benue |
|         |       |
| Gboko   | Benue |
|         |       |
| Makurdi | Benue |
|         |       |
| Makurdi | Benue |
| Makurdi | Benue |
|         |       |
| Makurdi | Benue |
|         |       |
| Makurdi | Benue |
|         |       |
| Makurdi | Benue |
|         |       |
| Makurdi | Benue |
|         |       |
| Makurdi | Benue |
|         |       |
| Makurdi | Benue |
|         |       |
| Kwande  | Benue |
| Gboko   | Benue |
|         |       |
| Makurdi | Benue |
|         |       |
| Makurdi | Benue |

|           |       |
|-----------|-------|
|           |       |
| Makurdi   | Benue |
|           |       |
| Makurdi   | Benue |
|           |       |
| Kwande    | Benue |
|           |       |
| Otukpo    | Benue |
|           |       |
| Otukpo    | Benue |
| Oju       | Benue |
|           |       |
| Makurdi   | Benue |
|           |       |
| Makurdi   | Benue |
| Gwer East | Benue |
|           |       |
| Makurdi   | Benue |
|           |       |
| Ukum      | Benue |
| Vandeikya | Benue |
|           |       |
| Gboko     | Benue |
|           |       |
| Gboko     | Benue |
|           |       |
| Makurdi   | Benue |
|           |       |
| Makurdi   | Benue |
|           |       |
| Makurdi   | Benue |
| Gwer East | Benue |
| Gwer East | Benue |
|           |       |
| Makurdi   | Benue |
|           |       |
| Makurdi   | Benue |
| Buruku    | Benue |
|           |       |
| Gwer West | Benue |
|           |       |
| Gwer West | Benue |
| Abadam    | Borno |

|                 |       |
|-----------------|-------|
| Bama            | Borno |
| Biu             | Borno |
| Gwoza           | Borno |
| Maiduguri M. C. | Borno |
|                 |       |
| Kukawa          | Borno |
| Maiduguri M. C. | Borno |
| Maiduguri M. C. | Borno |
|                 |       |
| Maiduguri M. C. | Borno |
| Maiduguri M. C. | Borno |
|                 |       |
| Maiduguri M. C. | Borno |
|                 |       |
| Maiduguri M. C. | Borno |
|                 |       |
| Maiduguri M. C. | Borno |
|                 |       |
| Monguno         | Borno |
| Ngala           | Borno |
|                 |       |
| Maiduguri M. C. | Borno |
| Maiduguri M. C. | Borno |
| Maiduguri M. C. | Borno |
| Maiduguri M. C. | Borno |
| Maiduguri M. C. | Borno |
| Maiduguri M. C. | Borno |
| Maiduguri M. C. | Borno |
| Maiduguri M. C. | Borno |
| Biu             | Borno |
| Bama            | Borno |
| Monguno         | Borno |
| Biu             | Borno |
| Maiduguri M. C. | Borno |
|                 |       |
| Gwoza           | Borno |
|                 |       |
| Maiduguri M. C. | Borno |
|                 |       |
| Maiduguri M. C. | Borno |
|                 |       |
| Maiduguri M. C. | Borno |
|                 |       |
| Biu             | Borno |
| Biu             | Borno |
| Biu             | Borno |

|                 |         |
|-----------------|---------|
| Maiduguri M. C. | Borno   |
| Ngala           | Borno   |
| Dambo           | Borno   |
| Hawul           | Borno   |
| Dikwa           | Borno   |
| Kwaya / Kusar   | Borno   |
| Shani           | Borno   |
| Konduga         | Borno   |
| Mobbar          | Borno   |
| Gubio           | Borno   |
| Nganzai         | Borno   |
| Marte           | Borno   |
| Gwoza           | Borno   |
| Bama            | Borno   |
| Gwoza           | Borno   |
| Magumeri        | Borno   |
| Askira / Uba    | Borno   |
| Jere            | Borno   |
| Maiduguri M. C. | Borno   |
| Maiduguri M. C. | Borno   |
| Maiduguri M. C. | Borno   |
| Maiduguri M. C. | Borno   |
| Jere            | Borno   |
| Maiduguri M. C. | Borno   |
| Maiduguri M. C. | Borno   |
| Maiduguri M. C. | Borno   |
| Maiduguri M. C. | Borno   |
| Gwoza           | Borno   |
| Jere            | Borno   |
| Maiduguri M. C. | Borno   |
| Jere            | Borno   |
| Maiduguri M. C. | Borno   |
| Yenagoa         | Bayelsa |
| Yenagoa         | Bayelsa |
| Yenagoa         | Bayelsa |
| Ekeremor        | Bayelsa |
| Yenagoa         | Bayelsa |
| Yenagoa         | Bayelsa |
| Yenagoa         | Bayelsa |



|                      |             |
|----------------------|-------------|
| Calabar Municipality | Cross River |
| Calabar Municipality | Cross River |
| Ikom                 | Cross River |
| Ikom                 | Cross River |
| Obudu                | Cross River |
| Ogoja                | Cross River |
| Ogoja                | Cross River |
| Ogoja                | Cross River |
| Yakurr               | Cross River |
| Yala                 | Cross River |
| Yala                 | Cross River |
| Yala                 | Cross River |
| Ikom                 | Cross River |
| Calabar Municipality | Cross River |
| Calabar Municipality | Cross River |
| Calabar Municipality | Cross River |
| Calabar Municipality | Cross River |
| Calabar Municipality | Cross River |
| Ikom                 | Cross River |
| Ogoja                | Cross River |
| Ogoja                | Cross River |
| Calabar Municipality | Cross River |
| Calabar Municipality | Cross River |
| Calabar Municipality | Cross River |
| Calabar Municipality | Cross River |
| Calabar Municipality | Cross River |
| Obudu                | Cross River |
| Calabar Municipality | Cross River |
| Calabar Municipality | Cross River |
| Calabar Municipality | Cross River |

|                      |             |
|----------------------|-------------|
| Calabar Municipality | Cross River |
| Calabar Municipality | Cross River |
| Calabar Municipality | Cross River |
| Calabar Municipality | Cross River |
| Calabar Municipality | Cross River |
| Calabar South        | Cross River |
| Calabar South        | Cross River |
| Calabar South        | Cross River |
| Calabar South        | Cross River |
| Akpabuyo             | Cross River |
| Odukpani             | Cross River |
| Akamkpa              | Cross River |
| Yakurr               | Cross River |
| Obubra               | Cross River |
| Ikom                 | Cross River |
| Obanliku             | Cross River |
| Abi                  | Cross River |
| Calabar Municipality | Cross River |
| Biase                | Cross River |
| Calabar Municipality | Cross River |
| Calabar Municipality | Cross River |
| Calabar Municipality | Cross River |
| Akamkpa              | Cross River |
| Ikom                 | Cross River |
| Ikom                 | Cross River |
| Obubra               | Cross River |
| Yakurr               | Cross River |
| Yakurr               | Cross River |
| Ogoja                | Cross River |
| Yakurr               | Cross River |

|                      |             |
|----------------------|-------------|
| Ikom                 | Cross River |
| Ikom                 | Cross River |
| Ikom                 | Cross River |
| Boki                 | Cross River |
| Yakurr               | Cross River |
|                      |             |
| Calabar Municipality | Cross River |
| Ogoja                | Cross River |
|                      |             |
| Calabar Municipality | Cross River |
| Biase                | Cross River |
|                      |             |
| Calabar South        | Cross River |
| Bekwarra             | Cross River |
|                      |             |
| Calabar Municipality | Cross River |
|                      |             |
| Ogoja                | Cross River |
|                      |             |
| Calabar Municipality | Cross River |
|                      |             |
| Calabar Municipality | Cross River |
|                      |             |
| Yakurr               | Cross River |
|                      |             |
| Calabar Municipality | Cross River |
|                      |             |
| Ikom                 | Cross River |
|                      |             |
| Calabar Municipality | Cross River |
|                      |             |
| Uvwie                | Delta       |
|                      |             |
| Uvwie                | Delta       |
| Uvwie                | Delta       |
| Uvwie                | Delta       |
|                      |             |
| Uvwie                | Delta       |
| Sapele               | Delta       |
|                      |             |
| Udu                  | Delta       |
|                      |             |
| Ughelli North        | Delta       |
|                      |             |
| Warri North          | Delta       |
|                      |             |
| Warri North          | Delta       |



|               |       |
|---------------|-------|
| Warri North   | Delta |
| Warri North   | Delta |
| Warri North   | Delta |
| Warri North   | Delta |
| Warri North   | Delta |
| Uvwie         | Delta |
| Warri North   | Delta |
| Warri North   | Delta |
| Warri North   | Delta |
| Warri North   | Delta |
| Warri North   | Delta |
| Warri North   | Delta |
| Warri North   | Delta |
| Warri North   | Delta |
| Warri North   | Delta |
| Uvwie         | Delta |
| Ughelli North | Delta |
| Warri North   | Delta |
| Uvwie         | Delta |
| Warri North   | Delta |
| Warri North   | Delta |
| Sapele        | Delta |
| Warri North   | Delta |
| Warri South   | Delta |
| Warri South   | Delta |
| Warri South   | Delta |
| Warri South   | Delta |
| Warri South   | Delta |
| Uvwie         | Delta |
| Warri North   | Delta |
| Warri North   | Delta |

|                  |       |
|------------------|-------|
| Warri South      | Delta |
| Udu              | Delta |
| Warri South      | Delta |
| Uvwie            | Delta |
| Uvwie            | Delta |
| Warri South      | Delta |
| Ughelli North    | Delta |
| Udu              | Delta |
| Uvwie            | Delta |
| Uvwie            | Delta |
| Uvwie            | Delta |
| Udu              | Delta |
| Warri South      | Delta |
| Oshimili - South | Delta |
| Warri South      | Delta |
| Sapele           | Delta |
| Warri South      | Delta |
| Uvwie            | Delta |
| Warri South      | Delta |
| Warri South      | Delta |
| Uvwie            | Delta |
| Warri North      | Delta |
| Warri South      | Delta |
| Ughelli North    | Delta |
| Uvwie            | Delta |
| Uvwie            | Delta |
| Sapele           | Delta |
| Warri South      | Delta |

|                  |       |
|------------------|-------|
| Warri South      | Delta |
| Warri North      | Delta |
| Warri South      | Delta |
| Uvwie            | Delta |
| Uvwie            | Delta |
| Isoko North      | Delta |
| Sapele           | Delta |
| Sapele           | Delta |
| Warri South      | Delta |
| Uvwie            | Delta |
| Ika North- East  | Delta |
| Oshimili - North | Delta |
| Uvwie            | Delta |
| Udu              | Delta |
| Sapele           | Delta |
| Warri South      | Delta |
| Ika North- East  | Delta |
| Uvwie            | Delta |
| Warri South      | Delta |
| Oshimili - South | Delta |
| Oshimili - South | Delta |
| Sapele           | Delta |
| Warri North      | Delta |
| Warri North      | Delta |

|                 |        |
|-----------------|--------|
| Aniocha - South | Delta  |
| Aniocha - South | Delta  |
| Aniocha - South | Delta  |
| Aniocha - South | Delta  |
| Warri North     | Delta  |
| Aniocha North   | Delta  |
| Abakaliki       | Ebonyi |
| Abakaliki       | Ebonyi |
| Abakaliki       | Ebonyi |
| Abakaliki       | Ebonyi |
| Abakaliki       | Ebonyi |
| Abakaliki       | Ebonyi |
| Afikpo North    | Ebonyi |
| Ohaukwu         | Ebonyi |
| Abakaliki       | Ebonyi |
| Abakaliki       | Ebonyi |
| Abakaliki       | Ebonyi |
| Abakaliki       | Ebonyi |
| Abakaliki       | Ebonyi |
| Ebonyi          | Ebonyi |
| Afikpo South    | Ebonyi |
| Abakaliki       | Ebonyi |
| Abakaliki       | Ebonyi |
| Abakaliki       | Ebonyi |
| Afikpo North    | Ebonyi |
| Ikwo            | Ebonyi |
| Abakaliki       | Ebonyi |
| Esan West       | Edo    |
| Akoko Edo       | Edo    |
| Akoko Edo       | Edo    |
| Akoko Edo       | Edo    |
| Egor            | Edo    |
| Egor            | Edo    |
| Egor            | Edo    |
| Esan Central    | Edo    |
| Esan Central    | Edo    |
| Esan North East | Edo    |
| Esan South East | Edo    |
| Esan South East | Edo    |
| Esan West       | Edo    |
| Esan West       | Edo    |

|                 |     |
|-----------------|-----|
| Etsako Central  | Edo |
| Etsako East     | Edo |
| Etsako West     | Edo |
| Etsako West     | Edo |
| Etsako West     | Edo |
| Igueben         | Edo |
| Ikpoba/Okha     | Edo |
| Oredo           | Edo |
| Oredo           | Edo |
| Oredo           | Edo |
| Oredo           | Edo |
| Oredo           | Edo |
| Orhionmwon      | Edo |
| Orhionmwon      | Edo |
| Ovia North East | Edo |
| Ovia North East | Edo |
| Ovia South West | Edo |
| Ovia South West | Edo |
| Owan West       | Edo |
| Uhunmwode       | Edo |
| Orhionmwon      | Edo |
| Etsako Central  | Edo |
| Etsako Central  | Edo |
| Ikpoba/Okha     | Edo |
| Oredo           | Edo |
| Oredo           | Edo |
| Oredo           | Edo |
| Owan West       | Edo |
| Oredo           | Edo |
| Oredo           | Edo |
| Oredo           | Edo |
| Oredo           | Edo |
| Esan North East | Edo |
| Oredo           | Edo |
| Akoko Edo       | Edo |

|                 |     |
|-----------------|-----|
| Egor            | Edo |
| Oredo           | Edo |
| Oredo           | Edo |
| Oredo           | Edo |
| Oredo           | Edo |
| Etsako West     | Edo |
| Oredo           | Edo |
| Esan Central    | Edo |
| Owan East       | Edo |
| Ikpoba/Okha     | Edo |
| Akoko Edo       | Edo |
| Etsako West     | Edo |
| Oredo           | Edo |
| Oredo           | Edo |
| Oredo           | Edo |
| Oredo           | Edo |
| Ikpoba/Okha     | Edo |
| Ikpoba/Okha     | Edo |
| Oredo           | Edo |
| Egor            | Edo |
| Esan North East | Edo |
| Ovia North East | Edo |
| Etsako West     | Edo |
| Etsako East     | Edo |
| Oredo           | Edo |
| Oredo           | Edo |
| Oredo           | Edo |
| Egor            | Edo |

|                |     |
|----------------|-----|
| Oredo          | Edo |
| Ikpoba/Okha    | Edo |
| Igueben        | Edo |
| Ikpoba/Okha    | Edo |
| Oredo          | Edo |
| Egor           | Edo |
| Orhionmwon     | Edo |
| Oredo          | Edo |
| Egor           | Edo |
| Esan West      | Edo |
| Oredo          | Edo |
| Oredo          | Edo |
| Etsako East    | Edo |
| Oredo          | Edo |
| Oredo          | Edo |
| Oredo          | Edo |
| Ikpoba/Okha    | Edo |
| Ikpoba/Okha    | Edo |
| Oredo          | Edo |
| Oredo          | Edo |
| Etsako Central | Edo |
| Oredo          | Edo |
| Egor           | Edo |
| Egor           | Edo |
| Ikpoba/Okha    | Edo |
| Orhionmwon     | Edo |

|                 |     |
|-----------------|-----|
| Etsako West     | Edo |
| Oredo           | Edo |
| Oredo           | Edo |
| Oredo           | Edo |
| Oredo           | Edo |
| Oredo           | Edo |
| Egor            | Edo |
| Egor            | Edo |
| Owan West       | Edo |
| Esan North East | Edo |
| Egor            | Edo |
| Oredo           | Edo |
| Oredo           | Edo |
| Oredo           | Edo |
| Oredo           | Edo |
| Egor            | Edo |
| Oredo           | Edo |
| Oredo           | Edo |
| Oredo           | Edo |
| Oredo           | Edo |
| Esan West       | Edo |
| Ikpoba/Okha     | Edo |
| Ikpoba/Okha     | Edo |
| Oredo           | Edo |



|                 |       |
|-----------------|-------|
| Owan West       | Edo   |
| Oredo           | Edo   |
| Etsako East     | Edo   |
| Oredo           | Edo   |
| Oredo           | Edo   |
| Esan West       | Edo   |
| Esan North East | Edo   |
| Esan West       | Edo   |
| Oredo           | Edo   |
| Oredo           | Edo   |
| Ado Ekiti       | Ekiti |
| Ado Ekiti       | Ekiti |
| Ado Ekiti       | Ekiti |
| Ado Ekiti       | Ekiti |
| Ado Ekiti       | Ekiti |
| Ado Ekiti       | Ekiti |
| Ido / Osi       | Ekiti |
| Ado Ekiti       | Ekiti |
| Ado Ekiti       | Ekiti |
| Ado Ekiti       | Ekiti |
| Ado Ekiti       | Ekiti |
| Ado Ekiti       | Ekiti |
| Ado Ekiti       | Ekiti |
| Ado Ekiti       | Ekiti |
| Ado Ekiti       | Ekiti |
| Ado Ekiti       | Ekiti |
| Ado Ekiti       | Ekiti |
| Ado Ekiti       | Ekiti |
| Ikole           | Ekiti |
| Ado Ekiti       | Ekiti |
| Ado Ekiti       | Ekiti |
| Ado Ekiti       | Ekiti |
| Ado Ekiti       | Ekiti |

|             |       |
|-------------|-------|
| Ido / Osi   | Ekiti |
| Ado Ekiti   | Ekiti |
| Ado Ekiti   | Ekiti |
| Ado Ekiti   | Ekiti |
| Ikole       | Ekiti |
| Ado Ekiti   | Ekiti |
| Ado Ekiti   | Ekiti |
| Ado Ekiti   | Ekiti |
| Ado Ekiti   | Ekiti |
| Ado Ekiti   | Ekiti |
| Ado Ekiti   | Ekiti |
| Ado Ekiti   | Ekiti |
| Ikere       | Ekiti |
| Ado Ekiti   | Ekiti |
| Ado Ekiti   | Ekiti |
| Ado Ekiti   | Ekiti |
| Oye         | Ekiti |
| Ado Ekiti   | Ekiti |
| Oye         | Ekiti |
| Moba        | Ekiti |
| Enugu East  | Enugu |
| Enugu East  | Enugu |
| Enugu South | Enugu |
| Enugu South | Enugu |
| Enugu East  | Enugu |

|             |       |
|-------------|-------|
| Nsukka      | Enugu |
| Enugu South | Enugu |
| Enugu East  | Enugu |
| Udi         | Enugu |
| Enugu South | Enugu |
| Nsukka      | Enugu |
| Udi         | Enugu |
| Udi         | Enugu |
| Enugu South | Enugu |
| Enugu South | Enugu |
| Enugu East  | Enugu |
| Enugu East  | Enugu |
| Enugu East  | Enugu |
| Enugu East  | Enugu |
| Enugu South | Enugu |
| Awgu        | Enugu |
| Ezeagu      | Enugu |
| Enugu South | Enugu |
| Enugu East  | Enugu |
| Aninri      | Enugu |
| Enugu East  | Enugu |
| Enugu South | Enugu |
| Enugu North | Enugu |
| Aninri      | Enugu |
| Enugu East  | Enugu |
| Enugu East  | Enugu |
| Enugu East  | Enugu |
| Enugu North | Enugu |
| Oji-River   | Enugu |
| Enugu North | Enugu |
| Enugu South | Enugu |
| Enugu East  | Enugu |
| Enugu South | Enugu |
| Enugu North | Enugu |
| Nkanu West  | Enugu |
| Nsukka      | Enugu |

|             |       |
|-------------|-------|
| Nsukka      | Enugu |
| Enugu North | Enugu |
| Enugu North | Enugu |
| Enugu South | Enugu |
| Enugu North | Enugu |
| Enugu South | Enugu |
| Enugu East  | Enugu |
|             |       |
| Nsukka      | Enugu |
|             |       |
| Nsukka      | Enugu |
|             |       |
| Enugu North | Enugu |
| Nsukka      | Enugu |
| Enugu South | Enugu |
| Enugu East  | Enugu |
| Enugu East  | Enugu |
| Enugu South | Enugu |
| Enugu East  | Enugu |
| Nkanu East  | Enugu |
| Nsukka      | Enugu |
|             |       |
| Nsukka      | Enugu |
| Nsukka      | Enugu |
| Enugu North | Enugu |
| Nsukka      | Enugu |
| Nsukka      | Enugu |
|             |       |
| Nsukka      | Enugu |
|             |       |
| Enugu North | Enugu |
|             |       |
| Udi         | Enugu |
| Udi         | Enugu |
|             |       |
| Nsukka      | Enugu |
| Nsukka      | Enugu |
|             |       |
| Oji-River   | Enugu |
|             |       |
| Udenu       | Enugu |
|             |       |
| Enugu East  | Enugu |
|             |       |
| Awgu        | Enugu |
|             |       |
| Nkanu West  | Enugu |
|             |       |
| Enugu East  | Enugu |

|                |       |
|----------------|-------|
| Enugu East     | Enugu |
| Enugu North    | Enugu |
|                |       |
| Enugu North    | Enugu |
|                |       |
| Enugu East     | Enugu |
|                |       |
| Enugu South    | Enugu |
|                |       |
| Enugu North    | Enugu |
|                |       |
| Udenu          | Enugu |
|                |       |
| Enugu North    | Enugu |
|                |       |
| Udenu          | Enugu |
|                |       |
| Igbo Eze North | Enugu |
|                |       |
| Enugu North    | Enugu |
|                |       |
| Nsukka         | Enugu |
|                |       |
| Municipal      | FCT   |
|                |       |
| Municipal      | FCT   |
| Municipal      | FCT   |
|                |       |
| Municipal      | FCT   |
| Municipal      | FCT   |
| Municipal      | FCT   |
|                |       |
| Municipal      | FCT   |
|                |       |
| Municipal      | FCT   |
| Kuje           | FCT   |
| Municipal      | FCT   |
|                |       |
| Municipal      | FCT   |
|                |       |
| Municipal      | FCT   |
|                |       |
| Municipal      | FCT   |
|                |       |
| Municipal      | FCT   |

|            |     |
|------------|-----|
| Bwari      | FCT |
| Bwari      | FCT |
| Bwari      | FCT |
| Bwari      | FCT |
| Bwari      | FCT |
| Municipal  | FCT |
| Bwari      | FCT |
| Bwari      | FCT |
| Bwari      | FCT |
| Bwari      | FCT |
| Bwari      | FCT |
| Gwagwalada | FCT |
| Kwali      | FCT |
| Municipal  | FCT |
| Municipal  | FCT |
| Municipal  | FCT |
| Municipal  | FCT |
| Municipal  | FCT |
| Municipal  | FCT |
| Municipal  | FCT |
| Municipal  | FCT |
| Municipal  | FCT |
| Bwari      | FCT |
| Kwali      | FCT |
| Abaji      | FCT |
| Municipal  | FCT |
| Municipal  | FCT |
| Municipal  | FCT |
| Municipal  | FCT |
| Municipal  | FCT |







|            |     |
|------------|-----|
| Municipal  | FCT |
| Municipal  | FCT |
| Municipal  | FCT |
| Municipal  | FCT |
| Municipal  | FCT |
|            |     |
| Municipal  | FCT |
|            |     |
| Municipal  | FCT |
|            |     |
| Municipal  | FCT |
|            |     |
| Municipal  | FCT |
|            |     |
| Municipal  | FCT |
|            |     |
| Municipal  | FCT |
|            |     |
| Bwari      | FCT |
|            |     |
| Municipal  | FCT |
| Municipal  | FCT |
|            |     |
| Municipal  | FCT |
|            |     |
| Municipal  | FCT |
|            |     |
| Municipal  | FCT |
|            |     |
| Gwagwalada | FCT |
|            |     |
| Municipal  | FCT |
|            |     |
| Gwagwalada | FCT |
| Municipal  | FCT |
|            |     |
| Municipal  | FCT |
|            |     |
| Municipal  | FCT |
|            |     |
| Municipal  | FCT |
|            |     |
| Municipal  | FCT |
|            |     |
| Kuje       | FCT |
|            |     |
| Municipal  | FCT |
|            |     |
| Municipal  | FCT |
|            |     |
| Abaji      | FCT |

|            |     |
|------------|-----|
| Municipal  | FCT |
| Gwagwalada | FCT |
| Gwagwalada | FCT |
|            |     |
| Kuje       | FCT |
| Gwagwalada | FCT |
|            |     |
| Gwagwalada | FCT |
| Bwari      | FCT |
|            |     |
| Bwari      | FCT |
|            |     |
| Municipal  | FCT |
|            |     |
| Municipal  | FCT |
|            |     |
| Bwari      | FCT |
|            |     |
| Bwari      | FCT |
| Bwari      | FCT |
|            |     |
| Bwari      | FCT |
|            |     |
| Bwari      | FCT |
|            |     |
| Gwagwalada | FCT |
| Municipal  | FCT |
|            |     |
| Municipal  | FCT |
|            |     |
| Municipal  | FCT |
|            |     |
| Bwari      | FCT |
|            |     |
| Municipal  | FCT |
|            |     |
| Municipal  | FCT |

|            |     |
|------------|-----|
| Municipal  | FCT |
|            |     |
| Municipal  | FCT |
|            |     |
| Municipal  | FCT |
| Bwari      | FCT |
|            |     |
| Municipal  | FCT |
|            |     |
| Kuje       | FCT |
|            |     |
| Gwagwalada | FCT |
| Municipal  | FCT |
| Kuje       | FCT |
|            |     |
| Municipal  | FCT |
|            |     |
| Bwari      | FCT |
|            |     |
| Municipal  | FCT |
|            |     |
| Bwari      | FCT |
|            |     |
| Municipal  | FCT |
| Kuje       | FCT |
|            |     |
| Municipal  | FCT |
|            |     |
| Municipal  | FCT |
| Gwagwalada | FCT |
| Municipal  | FCT |
| Municipal  | FCT |
|            |     |
| Municipal  | FCT |
| Municipal  | FCT |
| Municipal  | FCT |
|            |     |
| Municipal  | FCT |
|            |     |
| Municipal  | FCT |
| Gwagwalada | FCT |
|            |     |
| Municipal  | FCT |
| Municipal  | FCT |
|            |     |
| Bwari      | FCT |
| Municipal  | FCT |
|            |     |
| Municipal  | FCT |

|            |     |
|------------|-----|
|            |     |
| Municipal  | FCT |
| Bwari      | FCT |
| Municipal  | FCT |
|            |     |
| Municipal  | FCT |
|            |     |
| Municipal  | FCT |
| Bwari      | FCT |
|            |     |
| Gwagwalada | FCT |
|            |     |
| Bwari      | FCT |
|            |     |
| Municipal  | FCT |
|            |     |
| Municipal  | FCT |
| Municipal  | FCT |
|            |     |
| Municipal  | FCT |
| Municipal  | FCT |
|            |     |
| Municipal  | FCT |
|            |     |
| Municipal  | FCT |
|            |     |
| Municipal  | FCT |
|            |     |
| Municipal  | FCT |
|            |     |
| Municipal  | FCT |
|            |     |
| Municipal  | FCT |
|            |     |
| Municipal  | FCT |
| Bwari      | FCT |
|            |     |
| Municipal  | FCT |



|            |     |
|------------|-----|
|            |     |
| Bwari      | FCT |
|            |     |
| Municipal  | FCT |
|            |     |
| Municipal  | FCT |
|            |     |
| Kuje       | FCT |
|            |     |
| Municipal  | FCT |
|            |     |
| Bwari      | FCT |
|            |     |
| Municipal  | FCT |
|            |     |
| Gwagwalada | FCT |
|            |     |
| Kuje       | FCT |
|            |     |
| Gwagwalada | FCT |
|            |     |
| Municipal  | FCT |
|            |     |
| Municipal  | FCT |
|            |     |
| Gwagwalada | FCT |
|            |     |
| Municipal  | FCT |
|            |     |
| Kwali      | FCT |
|            |     |
| Municipal  | FCT |
| Bwari      | FCT |
| Municipal  | FCT |
|            |     |
| Municipal  | FCT |
|            |     |
| Municipal  | FCT |







|         |       |
|---------|-------|
| Akko    | Gombe |
| Akko    | Gombe |
| Akko    | Gombe |
| Nafada  | Gombe |
| Nafada  | Gombe |
| Nafada  | Gombe |
| Nafada  | Gombe |
| Nafada  | Gombe |
| Nafada  | Gombe |
| Nafada  | Gombe |
| Nafada  | Gombe |
| Nafada  | Gombe |
| Nafada  | Gombe |
| Nafada  | Gombe |
| Nafada  | Gombe |
| Nafada  | Gombe |
| Nafada  | Gombe |
| Nafada  | Gombe |
| Nafada  | Gombe |
| Nafada  | Gombe |
| Shongom | Gombe |
| Shongom | Gombe |
| Shongom | Gombe |
| Shongom | Gombe |
| Shongom | Gombe |
| Shongom | Gombe |
| Shongom | Gombe |
| Shongom | Gombe |
| Shongom | Gombe |
| Shongom | Gombe |
| Shongom | Gombe |
| Shongom | Gombe |
| Shongom | Gombe |
| Shongom | Gombe |
| Shongom | Gombe |
| Shongom | Gombe |
| Shongom | Gombe |
| Shongom | Gombe |
| Shongom | Gombe |
| Shongom | Gombe |
| Shongom | Gombe |
| Shongom | Gombe |
| Shongom | Gombe |
| Shongom | Gombe |
| Shongom | Gombe |
| Shongom | Gombe |
| Shongom | Gombe |
| Shongom | Gombe |
| Gombe   | Gombe |
| Akko    | Gombe |
| Akko    | Gombe |
| Gombe   | Gombe |

|                               |       |
|-------------------------------|-------|
| Billiri                       | Gombe |
| Akko                          | Gombe |
| Akko                          | Gombe |
| Akko                          | Gombe |
| Aboh Mbaise                   | Imo   |
| Ahiazu Mbaise                 | Imo   |
| Ezinihitte Mbaise             | Imo   |
| Ezinihitte Mbaise             | Imo   |
|                               |       |
| Ikeduru (Iho)                 | Imo   |
| Okigwe (Okigwe)               | Imo   |
| Owerri West<br>(Umuguma)      | Imo   |
| Owerri Urban<br>(Owerri)      | Imo   |
| Owerri Urban<br>(Owerri)      | Imo   |
| Owerri Urban<br>(Owerri)      | Imo   |
| Owerri Urban<br>(Owerri)      | Imo   |
| Owerri Urban<br>(Owerri)      | Imo   |
| Owerri Urban<br>(Owerri)      | Imo   |
| Owerri Urban<br>(Owerri)      | Imo   |
| Owerri Urban<br>(Owerri)      | Imo   |
| Owerri Urban<br>(Owerri)      | Imo   |
| Owerri Urban<br>(Owerri)      | Imo   |
| Owerri Urban<br>(Owerri)      | Imo   |
| Owerri Urban<br>(Owerri)      | Imo   |
| Owerri Urban<br>(Owerri)      | Imo   |
| Owerri Urban<br>(Owerri)      | Imo   |
| Owerri Urban<br>(Owerri)      | Imo   |
| Owerri Urban<br>(Owerri)      | Imo   |
| Owerri Urban<br>(Owerri)      | Imo   |
| Owerri Urban<br>(Owerri)      | Imo   |
| Owerri Urban<br>(Owerri)      | Imo   |
| Owerri Urban<br>(Owerri)      | Imo   |
| Owerri Urban<br>(Owerri)      | Imo   |
| Owerri Urban<br>(Owerri)      | Imo   |
| Owerri North (Orie<br>Uratta) | Imo   |

|                            |     |
|----------------------------|-----|
| Owerri North (Orie Uratta) | Imo |
| Owerri West (Umuguma)      | Imo |
| Owerri Urban (Owerri)      | Imo |
| Owerri Urban (Owerri)      | Imo |
| Owerri Urban (Owerri)      | Imo |
| Owerri Urban (Owerri)      | Imo |
| Mbaitoli (Nwaorieubi)      | Imo |
| Owerri Urban (Owerri)      | Imo |
| Owerri North (Orie Uratta) | Imo |
| Okigwe (Okigwe)            | Imo |
| Orlu                       | Imo |
| Owerri North (Orie Uratta) | Imo |
| Owerri Urban (Owerri)      | Imo |
| Owerri Urban (Owerri)      | Imo |
| Owerri Urban (Owerri)      | Imo |
| Aboh Mbaise                | Imo |
| Owerri Urban (Owerri)      | Imo |
| Owerri Urban (Owerri)      | Imo |
| Owerri West (Umuguma)      | Imo |
| Owerri West (Umuguma)      | Imo |
| Owerri North (Orie Uratta) | Imo |
| Owerri Urban (Owerri)      | Imo |
| Owerri Urban (Owerri)      | Imo |
| Owerri Urban (Owerri)      | Imo |
| Owerri Urban (Owerri)      | Imo |

|                               |     |
|-------------------------------|-----|
| Mbaitoli (Nwaorieubi)         | Imo |
| Ihitte/Uboma<br>(Isinweke)    | Imo |
| Owerri West<br>(Umuguma)      | Imo |
| Owerri Urban<br>(Owerri)      | Imo |
| Owerri North (Orie<br>Uratta) | Imo |
| Owerri North (Orie<br>Uratta) | Imo |
| Orlu                          | Imo |
| Owerri North (Orie<br>Uratta) | Imo |
| Aboh Mbaise                   | Imo |
| Owerri North (Orie<br>Uratta) | Imo |
| Owerri Urban<br>(Owerri)      | Imo |
| Orlu                          | Imo |
| Owerri Urban<br>(Owerri)      | Imo |
| Owerri Urban<br>(Owerri)      | Imo |
| Owerri West<br>(Umuguma)      | Imo |
| Owerri Urban<br>(Owerri)      | Imo |
| Owerri North (Orie<br>Uratta) | Imo |
| Owerri Urban<br>(Owerri)      | Imo |
| Owerri West<br>(Umuguma)      | Imo |
| Owerri Urban<br>(Owerri)      | Imo |
| Ngor Okpala<br>(Umuneke)      | Imo |
| Isu (Umundugba)               | Imo |
| Aboh Mbaise                   | Imo |
| Owerri North (Orie<br>Uratta) | Imo |
| Owerri North (Orie<br>Uratta) | Imo |
| Orlu                          | Imo |

|                            |        |
|----------------------------|--------|
| Owerri West (Umuguma)      | Imo    |
| Owerri West (Umuguma)      | Imo    |
| Ahiazu Mbaise              | Imo    |
| Owerri Urban (Owerri)      | Imo    |
| Ahiazu Mbaise              | Imo    |
| Owerri West (Umuguma)      | Imo    |
| Owerri West (Umuguma)      | Imo    |
| Owerri North (Orie Uratta) | Imo    |
| Ngor Okpala (Umuneke)      | Imo    |
| Dutse                      | Jigawa |
| Jahun                      | Jigawa |
| Hadejia                    | Jigawa |
| Gumel                      | Jigawa |
| Kazaure                    | Jigawa |
| Kazaure                    | Jigawa |
| Ringim                     | Jigawa |
| Birnin Kudu                | Jigawa |
| Dutse                      | Jigawa |
| Dutse                      | Jigawa |
| Babura                     | Jigawa |
| Dutse                      | Jigawa |
| Dutse                      | Jigawa |
| Dutse                      | Jigawa |
| Dutse                      | Jigawa |
| Kafin Hausa                | Jigawa |
| Argungu                    | Kebbi  |
| Birnin Kebbi               | Kebbi  |
| Birnin Kebbi               | Kebbi  |
| Yauri                      | Kebbi  |
| Birnin Kebbi               | Kebbi  |
| Zuru                       | Kebbi  |
| Birnin Kebbi               | Kebbi  |
| Birnin Kebbi               | Kebbi  |
| Birnin Kebbi               | Kebbi  |
| Yauri                      | Kebbi  |
| Zuru                       | Kebbi  |
| Birnin Kebbi               | Kebbi  |



|              |        |
|--------------|--------|
| Kaduna South | Kaduna |
| Kaduna South | Kaduna |
| Kaduna South | Kaduna |
|              |        |
| Kaduna North | Kaduna |
|              |        |
| Sabon Gari   | Kaduna |
| Sabon Gari   | Kaduna |
| Zaria        | Kaduna |
| Zaria        | Kaduna |
| Zaria        | Kaduna |
| Kaduna North | Kaduna |
|              |        |
| Sabon Gari   | Kaduna |
| Kaduna North | Kaduna |
| Kaduna North | Kaduna |
| Kaduna North | Kaduna |
|              |        |
| Kaduna North | Kaduna |
|              |        |
| Zaria        | Kaduna |
|              |        |
| Igabi        | Kaduna |
| Giwa         | Kaduna |
|              |        |
| Jema'a       | Kaduna |
| Zaria        | Kaduna |
|              |        |
| Kaduna South | Kaduna |
|              |        |
| Kaduna North | Kaduna |
| Kaduna South | Kaduna |
| Kaduna North | Kaduna |
| Kaduna North | Kaduna |
| Kaduna North | Kaduna |
| Kaduna North | Kaduna |
| Zaria        | Kaduna |
|              |        |
| Kaduna North | Kaduna |
|              |        |
| Kaduna North | Kaduna |
| Kaduna North | Kaduna |
| Igabi        | Kaduna |
| Kaduna North | Kaduna |
| Zaria        | Kaduna |
| Jema'a       | Kaduna |
|              |        |
| Kaduna North | Kaduna |
| Kachia       | Kaduna |

|              |        |
|--------------|--------|
| Kaduna South | Kaduna |
| Kaduna South | Kaduna |
| Kaduna North | Kaduna |
| Makarfi      | Kaduna |
| Kaduna South | Kaduna |
| Igabi        | Kaduna |
| Sabon Gari   | Kaduna |
| Kaduna South | Kaduna |
| Kaduna North | Kaduna |
| Kaduna North | Kaduna |
| Birnin Gwari | Kaduna |
| Kaduna North | Kaduna |
| Chikun       | Kaduna |
| Kaduna South | Kaduna |
| Zaria        | Kaduna |
| Kaduna North | Kaduna |
| Sabon Gari   | Kaduna |
| Kaduna South | Kaduna |
| Zaria        | Kaduna |
| Kaduna South | Kaduna |
| Zaria        | Kaduna |
| Kaduna North | Kaduna |
| Kaduna North | Kaduna |
| Kaduna South | Kaduna |
| Sabon Gari   | Kaduna |
| Kaduna South | Kaduna |
| Kaduna North | Kaduna |
| Kaduna North | Kaduna |



|              |        |
|--------------|--------|
| Chikun       | Kaduna |
| Kaduna North | Kaduna |
| Jaba         | Kaduna |
| Kaduna North | Kaduna |
| Zaria        | Kaduna |
| Kaduna North | Kaduna |
| Jema'a       | Kaduna |
| Kaduna South | Kaduna |
| Kaduna North | Kaduna |
| Kaduna North | Kaduna |
| Kaduna North | Kaduna |
| Zangon Kataf | Kaduna |
| Igabi        | Kaduna |
| Kachia       | Kaduna |
| Kachia       | Kaduna |
| Zaria        | Kaduna |
| Lere         | Kaduna |
| Kaduna North | Kaduna |
| Sabon Gari   | Kaduna |
| Sabon Gari   | Kaduna |
| Kaduna North | Kaduna |
| Zaria        | Kaduna |
| Chikun       | Kaduna |
| Chikun       | Kaduna |
| Kaduna North | Kaduna |
| Igabi        | Kaduna |
| Chikun       | Kaduna |
| Kaduna North | Kaduna |
| Kaduna North | Kaduna |
| Kaduna South | Kaduna |
| Sabon Gari   | Kaduna |

|              |        |
|--------------|--------|
| Kaduna North | Kaduna |
| Sabon Gari   | Kaduna |
| Kaduna North | Kaduna |
|              |        |
| Chikun       | Kaduna |
| Sabon Gari   | Kaduna |
|              |        |
| Sabon Gari   | Kaduna |
|              |        |
| Kaduna South | Kaduna |
|              |        |
| Zaria        | Kaduna |
|              |        |
| Kaduna South | Kaduna |
| Kaduna South | Kaduna |
|              |        |
| Kaduna North | Kaduna |
| Zaria        | Kaduna |
|              |        |
| Zaria        | Kaduna |
|              |        |
| Kubau        | Kaduna |
|              |        |
| Zaria        | Kaduna |
|              |        |
| Kaduna South | Kaduna |
|              |        |
| Kaduna South | Kaduna |
|              |        |
| Zaria        | Kaduna |
|              |        |
| Igabi        | Kaduna |
|              |        |
| Kaduna North | Kaduna |
| Zaria        | Kaduna |
|              |        |
| Kaduna North | Kaduna |
|              |        |
| Kaduna South | Kaduna |
|              |        |
| Kaduna North | Kaduna |

|              |        |
|--------------|--------|
| Kaduna South | Kaduna |
| Kaduna South | Kaduna |
| Kaduna North | Kaduna |
| Kaduna North | Kaduna |
| Igabi        | Kaduna |
| Kaduna South | Kaduna |
| Zaria        | Kaduna |
| Kaduna South | Kaduna |
| Kaduna North | Kaduna |
| Sabon Gari   | Kaduna |
| Kaduna North | Kaduna |
| Ajaokuta     | Kogi   |
| Dekina       | Kogi   |
| Dekina       | Kogi   |
| Idah         | Kogi   |
| Lokoja       | Kogi   |
| Mopa Moro    | Kogi   |
| Okene        | Kogi   |
| Yagba West   | Kogi   |
| Lokoja       | Kogi   |
| Kabba/Bunu   | Kogi   |
| Yagba East   | Kogi   |
| Ankpa        | Kogi   |
| Lokoja       | Kogi   |
| Yagba East   | Kogi   |
| Yagba East   | Kogi   |
| Kabba/Bunu   | Kogi   |
| Yagba West   | Kogi   |
| Kabba/Bunu   | Kogi   |
| Ijumu        | Kogi   |
| Ajaokuta     | Kogi   |
| Dekina       | Kogi   |
| Kabba/Bunu   | Kogi   |
| Lokoja       | Kogi   |
| Okene        | Kogi   |
| Dekina       | Kogi   |

|           |      |
|-----------|------|
| Ajaokuta  | Kogi |
| Okene     | Kogi |
| Idah      | Kogi |
| Lokoja    | Kogi |
| Idah      | Kogi |
|           |      |
| Okene     | Kogi |
| Lokoja    | Kogi |
| Ajaokuta  | Kogi |
|           |      |
| Okehi     | Kogi |
|           |      |
| Okene     | Kogi |
| Okene     | Kogi |
| Lokoja    | Kogi |
| Lokoja    | Kogi |
|           |      |
| Adavi     | Kogi |
|           |      |
| Dekina    | Kogi |
| Lokoja    | Kogi |
|           |      |
| Okehi     | Kogi |
| Ankpa     | Kogi |
|           |      |
| Ajaokuta  | Kogi |
|           |      |
| Adavi     | Kogi |
|           |      |
| Ajaokuta  | Kogi |
| Ofu       | Kogi |
|           |      |
| Dekina    | Kogi |
|           |      |
| Lokoja    | Kogi |
|           |      |
| Okehi     | Kogi |
|           |      |
| Ibaji     | Kogi |
| Dekina    | Kogi |
|           |      |
| Okene     | Kogi |
| Olamaboro | Kogi |
|           |      |
| Ankpa     | Kogi |
|           |      |
| Lokoja    | Kogi |
| Okene     | Kogi |
|           |      |
| Lokoja    | Kogi |

|                |      |
|----------------|------|
| Dekina         | Kogi |
| Dekina         | Kogi |
| Idah           | Kogi |
| Lokoja         | Kogi |
| Lokoja         | Kogi |
| Nasarawa       | Kano |
| Fagge          | Kano |
| Fagge          | Kano |
| Fagge          | Kano |
| Nasarawa       | Kano |
| Kano Municipal | Kano |
| Tarauni        | Kano |
| Kano Municipal | Kano |
| Nasarawa       | Kano |
| Kano Municipal | Kano |
| Tarauni        | Kano |
| Nasarawa       | Kano |
| Tarauni        | Kano |
| Kano Municipal | Kano |
| Kano Municipal | Kano |
| Nasarawa       | Kano |
| Fagge          | Kano |
| Kumbotso       | Kano |
| Kano Municipal | Kano |
| Kano Municipal | Kano |
| Kano Municipal | Kano |
| Kano Municipal | Kano |
| Gwarzo         | Kano |
| Kano Municipal | Kano |
| Wudil          | Kano |
| Nasarawa       | Kano |
| Danbata        | Kano |
| Fagge          | Kano |
| Tarauni        | Kano |
| Kano Municipal | Kano |
| Ungogo         | Kano |
| Dala           | Kano |

|                |      |
|----------------|------|
| Wudil          | Kano |
| Kano Municipal | Kano |
| Dala           | Kano |
| Tarauni        | Kano |
| Nasarawa       | Kano |
| Fagge          | Kano |
| Tarauni        | Kano |
| Tarauni        | Kano |
| Fagge          | Kano |
| Fagge          | Kano |
| Tudun Wada     | Kano |
| Bichi          | Kano |
| Bichi          | Kano |
| Gwale          | Kano |
| Tarauni        | Kano |
| Fagge          | Kano |
| Bebeji         | Kano |
| Nasarawa       | Kano |
| Kumbotso       | Kano |
| Ado Odo-Ota    | Ogun |
| Kano Municipal | Kano |
| Minjibir       | Kano |
| Fagge          | Kano |
| Dala           | Kano |
| Tarauni        | Kano |
| Sumaila        | Kano |
| Gaya           | Kano |
| Kano Municipal | Kano |
| Nasarawa       | Kano |

|             |         |
|-------------|---------|
| Tarauni     | Kano    |
| Fagge       | Kano    |
| Dala        | Kano    |
| Dawaki Kudu | Kano    |
| Fagge       | Kano    |
| Kumbotso    | Kano    |
| Shanono     | Kano    |
| Gezawa      | Kano    |
| Fagge       | Kano    |
| Fagge       | Kano    |
| Nasarawa    | Kano    |
| Nasarawa    | Kano    |
| Nasarawa    | Kano    |
| Dala        | Kano    |
| Kumbotso    | Kano    |
| Kumbotso    | Kano    |
| Tarauni     | Kano    |
| Karaye      | Kano    |
| Gwale       | Kano    |
| Kumbotso    | Kano    |
| Kumbotso    | Kano    |
| Bakori      | Katsina |
| Bakori      | Katsina |
| Bakori      | Katsina |
| Dandume     | Katsina |
| Daura       | Katsina |
| Daura       | Katsina |
| Daura       | Katsina |
| Dutsin-Ma   | Katsina |
| Funtua      | Katsina |
| Funtua      | Katsina |
| Funtua      | Katsina |
| Dandume     | Katsina |

|           |         |
|-----------|---------|
| Funtua    | Katsina |
| Kankara   | Katsina |
| Kankia    | Katsina |
| Katsina   | Katsina |
| Katsina   | Katsina |
| Katsina   | Katsina |
| Kurfi     | Katsina |
| Malufashi | Katsina |
| Mani      | Katsina |
| Mashi     | Katsina |
| Katsina   | Katsina |
| Katsina   | Katsina |
| Malufashi | Katsina |
| Malufashi | Katsina |
|           |         |
| Katsina   | Katsina |
| Katsina   | Katsina |
|           |         |
| Funtua    | Katsina |
| Jibia     | Katsina |
| Daura     | Katsina |
|           |         |
| Katsina   | Katsina |
|           |         |
| Katsina   | Katsina |
|           |         |
| Dutsin-Ma | Katsina |
| Malufashi | Katsina |
| Katsina   | Katsina |
|           |         |
| Katsina   | Katsina |
|           |         |
| Katsina   | Katsina |
|           |         |
| Malufashi | Katsina |
|           |         |
| Musawa    | Katsina |
|           |         |
| Malufashi | Katsina |
|           |         |
| Katsina   | Katsina |
|           |         |
| Katsina   | Katsina |
|           |         |
| Katsina   | Katsina |
|           |         |
| Katsina   | Katsina |



|              |         |
|--------------|---------|
| Katsina      | Katsina |
| Jibia        | Katsina |
| Ilorin East  | Kwara   |
| Ilorin East  | Kwara   |
| Ilorin East  | Kwara   |
| Ilorin East  | Kwara   |
| Ilorin East  | Kwara   |
| Ilorin East  | Kwara   |
| Ilorin-East  | Kwara   |
| Ilorin-West  | Kwara   |
| Ilorin-West  | Kwara   |
| Ilorin-West  | Kwara   |
| Ilorin East  | Kwara   |
| Ilorin East  | Kwara   |
| Ilorin East  | Kwara   |
| Ilorin-South | Kwara   |
| Offa         | Kwara   |
| Ilorin East  | Kwara   |
| Ilorin-South | Kwara   |
| Ilorin East  | Kwara   |
| Ilorin East  | Kwara   |
| Ilorin East  | Kwara   |
| Irepodun     | Kwara   |
| Moro         | Kwara   |
| Ilorin East  | Kwara   |
| Patigi       | Kwara   |
| Ilorin East  | Kwara   |
| Ilorin East  | Kwara   |
| Ilorin-South | Kwara   |
| Ilorin East  | Kwara   |
| Ilorin East  | Kwara   |
| Irepodun     | Kwara   |
| Ilorin East  | Kwara   |
| Ilorin East  | Kwara   |
| Ilorin East  | Kwara   |

|              |       |
|--------------|-------|
| Ilorin-South | Kwara |
| Irepodun     | Kwara |
| Ilorin East  | Kwara |
| Ilorin East  | Kwara |
| Oyun         | Kwara |
|              |       |
| Ilorin-South | Kwara |
| Ilorin East  | Kwara |
| Ilorin East  | Kwara |
| Offa         | Kwara |
|              |       |
| Irepodun     | Kwara |
| Ilorin-South | Kwara |
| Ilorin-South | Kwara |
| Ilorin-South | Kwara |
|              |       |
| Ilorin-West  | Kwara |
| Ilorin East  | Kwara |
| Ilorin East  | Kwara |
|              |       |
| Ilorin-West  | Kwara |
| Irepodun     | Kwara |
| Moro         | Kwara |
| Ilorin-West  | Kwara |
|              |       |
| Offa         | Kwara |
| Offa         | Kwara |
|              |       |
| Ilorin-South | Kwara |
| Edu          | Kwara |
| Kaiama       | Kwara |
| Offa         | Kwara |
| Ekiti        | Kwara |
| Ilorin-South | Kwara |
| Irepodun     | Kwara |
| Irepodun     | Kwara |
|              |       |
| Ilorin-West  | Kwara |
| Ilorin East  | Kwara |
|              |       |
| Ilorin-West  | Kwara |
| Ilorin-South | Kwara |
| Ilorin-West  | Kwara |
| Ilorin-West  | Kwara |
|              |       |
| Ilorin East  | Kwara |
| Edu          | Kwara |
| Edu          | Kwara |
| Offa         | Kwara |
| Ilorin-South | Kwara |

|              |       |
|--------------|-------|
| Ilorin East  | Kwara |
| Patigi       | Kwara |
| Ilorin-West  | Kwara |
| Patigi       | Kwara |
| Ilorin-South | Kwara |
| Ilorin-South | Kwara |
| Ilorin East  | Kwara |
| Irepodun     | Kwara |
| Ilorin-South | Kwara |
| Baruten      | Kwara |
| Oyun         | Kwara |
| Offa         | Kwara |
| Ilorin-West  | Kwara |
| Ilorin-South | Kwara |
| Ilorin-South | Kwara |
| Moro         | Kwara |
| Baruten      | Kwara |
| Asa          | Kwara |
| Irepodun     | Kwara |
| Ifelodun     | Kwara |
| Ilorin East  | Kwara |
| Patigi       | Kwara |
| Ilorin-West  | Kwara |
| Offa         | Kwara |
| Ilorin-West  | Kwara |
| Ilorin-West  | Kwara |

|              |       |
|--------------|-------|
|              |       |
| Ilorin-South | Kwara |
| Ilorin-West  | Kwara |
| Offa         | Kwara |
|              |       |
| Ilorin East  | Kwara |
| Ilorin-West  | Kwara |
|              |       |
| Offa         | Kwara |
|              |       |
| Offa         | Kwara |
|              |       |
| Irepodun     | Kwara |
|              |       |
| Offa         | Kwara |
|              |       |
| Ilorin-West  | Kwara |
|              |       |
| Ilorin-South | Kwara |
|              |       |
| Ilorin-South | Kwara |
|              |       |
| Ilorin-West  | Kwara |
| Ilorin East  | Kwara |
|              |       |
| Ilorin-West  | Kwara |
|              |       |
| Ilorin-South | Kwara |
|              |       |
| Ilorin-South | Kwara |
|              |       |
| Ilorin-West  | Kwara |
|              |       |
| Ilorin East  | Kwara |
|              |       |
| Ilorin-West  | Kwara |
|              |       |
| Agege        | Lagos |
| Agege        | Lagos |











|              |       |
|--------------|-------|
| Mushin       | Lagos |
| Mushin       | Lagos |
| Mushin       | Lagos |
| Mushin       | Lagos |
| Mushin       | Lagos |
| Mushin       | Lagos |
| Mushin       | Lagos |
| Mushin       | Lagos |
| Mushin       | Lagos |
| Mushin       | Lagos |
| Mushin       | Lagos |
| Mushin       | Lagos |
| Mushin       | Lagos |
| Mushin       | Lagos |
| Mushin       | Lagos |
| Mushin       | Lagos |
| Mushin       | Lagos |
| Ojo          | Lagos |
| Ojo          | Lagos |
| Ojo          | Lagos |
| Ojo          | Lagos |
| Ojo          | Lagos |
| Ojo          | Lagos |
| Ojo          | Lagos |
| Ojo          | Lagos |
| Oshodi/Isolo | Lagos |
| Oshodi/Isolo | Lagos |

|              |       |
|--------------|-------|
| Oshodi/Isolo | Lagos |
| Oshodi/Isolo | Lagos |
| Oshodi/Isolo | Lagos |
| Oshodi/Isolo | Lagos |
| Oshodi/Isolo | Lagos |
| Oshodi/Isolo | Lagos |
| Oshodi/Isolo | Lagos |
| Oshodi/Isolo | Lagos |
| Oshodi/Isolo | Lagos |
| Oshodi/Isolo | Lagos |
| Oshodi/Isolo | Lagos |
| Agege        | Lagos |
| Oshodi/Isolo | Lagos |
| Oshodi/Isolo | Lagos |
| Oshodi/Isolo | Lagos |
| Oshodi/Isolo | Lagos |
| Oshodi/Isolo | Lagos |
| Oshodi/Isolo | Lagos |
| Oshodi/Isolo | Lagos |
| Oshodi/Isolo | Lagos |
| Oshodi/Isolo | Lagos |
| Ibeju/Lekki  | Lagos |
| Surulere     | Lagos |
| Ojo          | Lagos |
| Oshodi/Isolo | Lagos |
| Amuwo-Odofin | Lagos |
| Somolu       | Lagos |
| Somolu       | Lagos |
| Somolu       | Lagos |
| Somolu       | Lagos |
| Somolu       | Lagos |



|                |       |
|----------------|-------|
| Surulere       | Lagos |
| Surulere       | Lagos |
| Surulere       | Lagos |
| Oshodi/Isolo   | Lagos |
| Eti-Osa        | Lagos |
| Lagos Mainland | Lagos |
| Lagos Mainland | Lagos |
| Eti-Osa        | Lagos |
| Eti-Osa        | Lagos |
| Ikeja          | Lagos |
| Lagos Island   | Lagos |
| Lagos Mainland | Lagos |
| Eti-Osa        | Lagos |
| Ikeja          | Lagos |
| Ikeja          | Lagos |
| Oshodi/Isolo   | Lagos |
| Kosofe         | Lagos |
| Mushin         | Lagos |
| Agege          | Lagos |
| Oshodi/Isolo   | Lagos |
| Eti-Osa        | Lagos |
| Kosofe         | Lagos |
| Oshodi/Isolo   | Lagos |
| Oshodi/Isolo   | Lagos |
| Surulere       | Lagos |
| Alimosho       | Lagos |
| Mushin         | Lagos |
| Ifako-Ijaye    | Lagos |
| Mushin         | Lagos |
| Eti-Osa        | Lagos |
| Ikeja          | Lagos |
| Lagos Island   | Lagos |

|                |       |
|----------------|-------|
| Kosofe         | Lagos |
|                |       |
| Ikeja          | Lagos |
| Ojo            | Lagos |
| Ikorodu        | Lagos |
| Eti-Osa        | Lagos |
| Badagry        | Lagos |
| Apapa          | Lagos |
| Lagos Mainland | Lagos |
| Lagos Mainland | Lagos |
| Lagos Mainland | Lagos |
| Eti-Osa        | Lagos |
|                |       |
| Ikeja          | Lagos |
|                |       |
| Agege          | Lagos |
| Ojo            | Lagos |
| Eti-Osa        | Lagos |
| Apapa          | Lagos |
| Lagos Mainland | Lagos |
| Lagos Mainland | Lagos |
|                |       |
| Somolu         | Lagos |
|                |       |
| Eti-Osa        | Lagos |
|                |       |
| Oshodi/Isolo   | Lagos |
|                |       |
| Oshodi/Isolo   | Lagos |
|                |       |
| Lagos Mainland | Lagos |
| Lagos Mainland | Lagos |
|                |       |
| Mushin         | Lagos |
|                |       |
| Eti-Osa        | Lagos |
|                |       |
| Mushin         | Lagos |
|                |       |
| Oshodi/Isolo   | Lagos |
| Mushin         | Lagos |
|                |       |
| Ifako-Ijaye    | Lagos |
|                |       |
| Mushin         | Lagos |

|              |       |
|--------------|-------|
|              |       |
| Kosofe       | Lagos |
| Eti-Osa      | Lagos |
| Oshodi/Isolo | Lagos |
| Eti-Osa      | Lagos |
| Eti-Osa      | Lagos |
| Oshodi/Isolo | Lagos |
| Oshodi/Isolo | Lagos |
| Mushin       | Lagos |
| Kosofe       | Lagos |
| Kosofe       | Lagos |
|              |       |
| Oshodi/Isolo | Lagos |
|              |       |
| Lagos Island | Lagos |
|              |       |
| Agege        | Lagos |
| Oshodi/Isolo | Lagos |
| Ikorodu      | Lagos |
| Agege        | Lagos |
| Oshodi/Isolo | Lagos |
| Agege        | Lagos |
| Kosofe       | Lagos |
| Agege        | Lagos |
| Agege        | Lagos |
| Amuwo-Odofin | Lagos |
|              |       |
| Oshodi/Isolo | Lagos |
| Agege        | Lagos |
| Ikorodu      | Lagos |

|                  |       |
|------------------|-------|
| Lagos Island     | Lagos |
| Agege            | Lagos |
| Ikorodu          | Lagos |
| Apapa            | Lagos |
| Somolu           | Lagos |
|                  |       |
| Agege            | Lagos |
|                  |       |
| Alimosho         | Lagos |
|                  |       |
| Alimosho         | Lagos |
|                  |       |
| Ajeromi/Ifelodun | Lagos |
|                  |       |
| Alimosho         | Lagos |
|                  |       |
| Amuwo-Odofin     | Lagos |
| Eti-Osa          | Lagos |
| Ikorodu          | Lagos |
|                  |       |
| Alimosho         | Lagos |
|                  |       |
| Alimosho         | Lagos |
|                  |       |
| Ajeromi/Ifelodun | Lagos |
| Oshodi/Isolo     | Lagos |
| Somolu           | Lagos |
|                  |       |
| Alimosho         | Lagos |
| Somolu           | Lagos |
|                  |       |
| Alimosho         | Lagos |
|                  |       |
| Alimosho         | Lagos |
|                  |       |
| Amuwo-Odofin     | Lagos |
|                  |       |
| Alimosho         | Lagos |
|                  |       |
| Agege            | Lagos |
| Apapa            | Lagos |
|                  |       |
| Oshodi/Isolo     | Lagos |
|                  |       |
| Alimosho         | Lagos |
|                  |       |
| Amuwo-Odofin     | Lagos |

|                  |       |
|------------------|-------|
| Oshodi/Isolo     | Lagos |
| Alimosho         | Lagos |
| Alimosho         | Lagos |
| Ajeromi/Ifelodun | Lagos |
| Alimosho         | Lagos |
| Apapa            | Lagos |
| Alimosho         | Lagos |
| Alimosho         | Lagos |
| Amuwo-Odofin     | Lagos |
| Apapa            | Lagos |
| Surulere         | Lagos |
| Apapa            | Lagos |
| Apapa            | Lagos |
| Ojo              | Lagos |
| Ojo              | Lagos |
| Ojo              | Lagos |
| Ojo              | Lagos |
| Apapa            | Lagos |
| Amuwo-Odofin     | Lagos |
| Apapa            | Lagos |
| Ojo              | Lagos |
| Badagry          | Lagos |
| Badagry          | Lagos |
| Apapa            | Lagos |
| Apapa            | Lagos |
| Ikeja            | Lagos |



|          |       |
|----------|-------|
| Ikeja    | Lagos |
|          |       |
| Ikeja    | Lagos |
|          |       |
| Ikeja    | Lagos |
|          |       |
| Ikeja    | Lagos |
|          |       |
| Kosofe   | Lagos |
|          |       |
| Ikeja    | Lagos |
|          |       |
| Ikeja    | Lagos |
| Ikeja    | Lagos |
|          |       |
| Ikeja    | Lagos |
| Ikeja    | Lagos |
|          |       |
| Ikeja    | Lagos |
|          |       |
| Kosofe   | Lagos |
| Ikeja    | Lagos |
|          |       |
| Ikeja    | Lagos |
|          |       |
| Ikeja    | Lagos |
|          |       |
| Ikeja    | Lagos |
|          |       |
| Ikeja    | Lagos |
| Surulere | Lagos |
|          |       |
| Ikeja    | Lagos |
| Surulere | Lagos |
|          |       |
| Surulere | Lagos |
| Surulere | Lagos |
|          |       |
| Surulere | Lagos |
| Surulere | Lagos |
| Surulere | Lagos |
|          |       |
| Surulere | Lagos |

|                  |       |
|------------------|-------|
| Lagos Island     | Lagos |
| Alimosho         | Lagos |
| Lagos Island     | Lagos |
| Alimosho         | Lagos |
| Alimosho         | Lagos |
| Ikeja            | Lagos |
| Ikeja            | Lagos |
| Kosofe           | Lagos |
| Lagos Island     | Lagos |
| Oshodi/Isolo     | Lagos |
| Mushin           | Lagos |
| Badagry          | Lagos |
| Surulere         | Lagos |
| Lagos Mainland   | Lagos |
| Ikeja            | Lagos |
| Alimosho         | Lagos |
| Alimosho         | Lagos |
| Somolu           | Lagos |
| Oshodi/Isolo     | Lagos |
| Alimosho         | Lagos |
| Somolu           | Lagos |
| Lagos Island     | Lagos |
| Lagos Island     | Lagos |
| Oshodi/Isolo     | Lagos |
| Oshodi/Isolo     | Lagos |
| Kosofe           | Lagos |
| Ajeromi/Ifelodun | Lagos |

|                  |       |
|------------------|-------|
| Surulere         | Lagos |
|                  |       |
| Agege            | Lagos |
| Mushin           | Lagos |
|                  |       |
| Ajeromi/Ifelodun | Lagos |
|                  |       |
| Somolu           | Lagos |
|                  |       |
| Eti-Osa          | Lagos |
|                  |       |
| Mushin           | Lagos |
| Mushin           | Lagos |
|                  |       |
| Kosofe           | Lagos |
| Agege            | Lagos |
| Somolu           | Lagos |
|                  |       |
| Eti-Osa          | Lagos |
|                  |       |
| Eti-Osa          | Lagos |
| Surulere         | Lagos |
| Kosofe           | Lagos |
| Surulere         | Lagos |
|                  |       |
| Alimosho         | Lagos |
|                  |       |
| Alimosho         | Lagos |
| Amuwo-Odofin     | Lagos |
|                  |       |
| Alimosho         | Lagos |
|                  |       |
| Lagos Mainland   | Lagos |
|                  |       |
| Surulere         | Lagos |
| Surulere         | Lagos |
| Lagos Island     | Lagos |
|                  |       |
| Ikeja            | Lagos |
|                  |       |
| Surulere         | Lagos |
| Oshodi/Isolo     | Lagos |
| Surulere         | Lagos |
| Surulere         | Lagos |
|                  |       |
| Ifako-Ijaye      | Lagos |

|                  |       |
|------------------|-------|
|                  |       |
| Alimosho         | Lagos |
| Lagos Mainland   | Lagos |
|                  |       |
| Mushin           | Lagos |
| Alimosho         | Lagos |
| Ikeja            | Lagos |
| Surulere         | Lagos |
| Somolu           | Lagos |
|                  |       |
| Oshodi/Isolo     | Lagos |
|                  |       |
| Epe              | Lagos |
| Oshodi/Isolo     | Lagos |
| Alimosho         | Lagos |
|                  |       |
| Ifako-Ijaye      | Lagos |
| Surulere         | Lagos |
| Ifako-Ijaye      | Lagos |
|                  |       |
| Ifako-Ijaye      | Lagos |
| Apapa            | Lagos |
| Ajeromi/Ifelodun | Lagos |
|                  |       |
| Mushin           | Lagos |
| Ifako-Ijaye      | Lagos |
| Lagos Island     | Lagos |
|                  |       |
| Oshodi/Isolo     | Lagos |
|                  |       |
| Alimosho         | Lagos |
|                  |       |
| Ifako-Ijaye      | Lagos |
| Alimosho         | Lagos |
| Oshodi/Isolo     | Lagos |
|                  |       |
| Alimosho         | Lagos |
| Oshodi/Isolo     | Lagos |
|                  |       |
| Ajeromi/Ifelodun | Lagos |
|                  |       |
| Amuwo-Odofin     | Lagos |
| Lagos Island     | Lagos |
|                  |       |
| Alimosho         | Lagos |

|                  |       |
|------------------|-------|
| Eti-Osa          | Lagos |
| Apapa            | Lagos |
| Amuwo-Odofin     | Lagos |
| Surulere         | Lagos |
| Surulere         | Lagos |
| Somolu           | Lagos |
| Ifako-Ijaye      | Lagos |
| Alimosho         | Lagos |
| Oshodi/Isolo     | Lagos |
| Eti-Osa          | Lagos |
| Alimosho         | Lagos |
| Alimosho         | Lagos |
| Surulere         | Lagos |
| Oshodi/Isolo     | Lagos |
| Surulere         | Lagos |
| Ojo              | Lagos |
| Alimosho         | Lagos |
| Somolu           | Lagos |
| Kosofe           | Lagos |
| Apapa            | Lagos |
| Lagos Island     | Lagos |
| Ifako-Ijaye      | Lagos |
| Ojo              | Lagos |
| Ajeromi/Ifelodun | Lagos |
| Ajeromi/Ifelodun | Lagos |
| Alimosho         | Lagos |
| Ajeromi/Ifelodun | Lagos |
| Oshodi/Isolo     | Lagos |
| Alimosho         | Lagos |

|                  |       |
|------------------|-------|
| Ajeromi/Ifelodun | Lagos |
| Kosofe           | Lagos |
| Apapa            | Lagos |
| Amuwo-Odofin     | Lagos |
| Kosofe           | Lagos |
| Amuwo-Odofin     | Lagos |
| Ikeja            | Lagos |
| Kosofe           | Lagos |
| Ikeja            | Lagos |
| Apapa            | Lagos |
| Apapa            | Lagos |
| Oshodi/Isolo     | Lagos |
| Ojo              | Lagos |
| Apapa            | Lagos |
| Badagry          | Lagos |
| Alimosho         | Lagos |
| Somolu           | Lagos |
| Alimosho         | Lagos |
| Oshodi/Isolo     | Lagos |
| Ifako-Ijaye      | Lagos |
| Alimosho         | Lagos |
| Lagos Mainland   | Lagos |
| Alimosho         | Lagos |
| Ajeromi/Ifelodun | Lagos |
| Surulere         | Lagos |
| Ajeromi/Ifelodun | Lagos |
| Ojo              | Lagos |
| Ojo              | Lagos |
| Surulere         | Lagos |
| Ojo              | Lagos |

|                  |        |
|------------------|--------|
| Surulere         | Lagos  |
| Surulere         | Lagos  |
| Abakaliki        | Ebonyi |
| Kosofe           | Lagos  |
| Alimosho         | Lagos  |
| Oshodi/Isolo     | Lagos  |
| Mushin           | Lagos  |
| Ikeja            | Lagos  |
| Apapa            | Lagos  |
| Agege            | Lagos  |
| Alimosho         | Lagos  |
| Alimosho         | Lagos  |
| Surulere         | Lagos  |
| Ifako-Ijaye      | Lagos  |
| Ifako-Ijaye      | Lagos  |
| Apapa            | Lagos  |
| Mushin           | Lagos  |
| Ikeja            | Lagos  |
| Ajeromi/Ifelodun | Lagos  |
| Abakaliki        | Ebonyi |
| Ajeromi/Ifelodun | Lagos  |
| Apapa            | Lagos  |
| Ojo              | Lagos  |
| Ojo              | Lagos  |
| Ikeja            | Lagos  |
| Badagry          | Lagos  |
| Surulere         | Lagos  |
| Ajeromi/Ifelodun | Lagos  |
| Oshodi/Isolo     | Lagos  |
| Agege            | Lagos  |
| Badagry          | Lagos  |
| Surulere         | Lagos  |
| Abakaliki        | Ebonyi |

|                  |       |
|------------------|-------|
| Agege            | Lagos |
|                  |       |
| Somolu           | Lagos |
| Somolu           | Lagos |
| Ifako-Ijaye      | Lagos |
|                  |       |
| Oshodi/Isolo     | Lagos |
| Ifako-Ijaye      | Lagos |
|                  |       |
| Mushin           | Lagos |
| Somolu           | Lagos |
| Kosofe           | Lagos |
|                  |       |
| Amuwo-Odofin     | Lagos |
|                  |       |
| Surulere         | Lagos |
|                  |       |
| Surulere         | Lagos |
| Oshodi/Isolo     | Lagos |
| Mushin           | Lagos |
| Lagos Mainland   | Lagos |
| Oshodi/Isolo     | Lagos |
|                  |       |
| Kosofe           | Lagos |
| Agege            | Lagos |
|                  |       |
| Ikeja            | Lagos |
|                  |       |
| Ikeja            | Lagos |
|                  |       |
| Alimosho         | Lagos |
| Ikeja            | Lagos |
| Kosofe           | Lagos |
| Lagos Mainland   | Lagos |
|                  |       |
| Kosofe           | Lagos |
| Ajeromi/Ifelodun | Lagos |
|                  |       |
| Surulere         | Lagos |
| Agege            | Lagos |
|                  |       |
| Alimosho         | Lagos |
|                  |       |
| Alimosho         | Lagos |
| Alimosho         | Lagos |
| Alimosho         | Lagos |



|                  |        |
|------------------|--------|
| Oshodi/Isolo     | Lagos  |
| Oshodi/Isolo     | Lagos  |
| Oshodi/Isolo     | Lagos  |
| Lagos Mainland   | Lagos  |
| Amuwo-Odofin     | Lagos  |
| Eti-Osa          | Lagos  |
| Alimosho         | Lagos  |
| Amuwo-Odofin     | Lagos  |
| Amuwo-Odofin     | Lagos  |
| Somolu           | Lagos  |
| Somolu           | Lagos  |
| Kosofe           | Lagos  |
| Kosofe           | Lagos  |
| Kosofe           | Lagos  |
| Surulere         | Lagos  |
| Abakaliki        | Ebonyi |
| Ajeromi/Ifelodun | Lagos  |
| Ibeju/Lekki      | Lagos  |
| Ifako-Ijaye      | Lagos  |
| Alimosho         | Lagos  |
| Alimosho         | Lagos  |
| Alimosho         | Lagos  |
| Ikorodu          | Lagos  |
| Agege            | Lagos  |
| Kosofe           | Lagos  |
| Agege            | Lagos  |
| Eti-Osa          | Lagos  |

|                  |       |
|------------------|-------|
| Kosofe           | Lagos |
| Kosofe           | Lagos |
| Ojo              | Lagos |
| Amuwo-Odofin     | Lagos |
| Kosofe           | Lagos |
| Mushin           | Lagos |
| Ojo              | Lagos |
| Oshodi/Isolo     | Lagos |
| Ifako-Ijaye      | Lagos |
| Surulere         | Lagos |
| Ajeromi/Ifelodun | Lagos |
| Apapa            | Lagos |
| Alimosho         | Lagos |
| Ikeja            | Lagos |
| Alimosho         | Lagos |
| Agege            | Lagos |
| Apapa            | Lagos |
| Eti-Osa          | Lagos |
| Ikorodu          | Lagos |
| Oshodi/Isolo     | Lagos |
| Ikeja            | Lagos |
| Alimosho         | Lagos |
| Alimosho         | Lagos |
| Alimosho         | Lagos |
| Oshodi/Isolo     | Lagos |
| Surulere         | Lagos |
| Eti-Osa          | Lagos |

|              |         |
|--------------|---------|
| Surulere     | Lagos   |
| Kosofe       | Lagos   |
| Oshodi/Isolo | Lagos   |
|              | 0 Ikeja |
| Surulere     | Lagos   |
| Kosofe       | Lagos   |
| Surulere     | Lagos   |
| Alimosho     | Lagos   |
| Mushin       | Lagos   |
| Ikorodu      | Lagos   |
| Ikeja        | Lagos   |
| Alimosho     | Lagos   |
| Alimosho     | Lagos   |
| Oshodi/Isolo | Lagos   |
| Alimosho     | Lagos   |
| Ifako-Ijaye  | Lagos   |
| Kosofe       | Lagos   |
| Ifako-Ijaye  | Lagos   |
| Alimosho     | Lagos   |
| Ikeja        | Lagos   |

|                |       |
|----------------|-------|
| Surulere       | Lagos |
|                |       |
| Ifako-Ijaye    | Lagos |
| Lagos Mainland | Lagos |
|                |       |
| Ojo            | Lagos |
|                |       |
| Ojo            | Lagos |
|                |       |
| Alimosho       | Lagos |
|                |       |
| Eti-Osa        | Lagos |
|                |       |
| Kosofe         | Lagos |
|                |       |
| Ikorodu        | Lagos |
|                |       |
| Ifako-Ijaye    | Lagos |
|                |       |
| Ikeja          | Lagos |
|                |       |
| Badagry        | Lagos |
|                |       |
| Ojo            | Lagos |
|                |       |
| Alimosho       | Lagos |
|                |       |
| Alimosho       | Lagos |
|                |       |
| Kosofe         | Lagos |
|                |       |
| Ikorodu        | Lagos |
|                |       |
| Alimosho       | Lagos |
|                |       |
| Ikeja          | Lagos |
|                |       |
| Lagos Island   | Lagos |
|                |       |
| Apapa          | Lagos |
|                |       |
| Apapa          | Lagos |

|              |       |
|--------------|-------|
|              |       |
| Ojo          | Lagos |
| Agege        | Lagos |
| Agege        | Lagos |
| Ikeja        | Lagos |
| Badagry      | Lagos |
|              |       |
| Alimosho     | Lagos |
|              |       |
| Alimosho     | Lagos |
|              |       |
| Alimosho     | Lagos |
|              |       |
| Alimosho     | Lagos |
|              |       |
| Alimosho     | Lagos |
|              |       |
| Ojo          | Lagos |
|              |       |
| Ikorodu      | Lagos |
|              |       |
| Alimosho     | Lagos |
|              |       |
| Ikorodu      | Lagos |
|              |       |
| Badagry      | Lagos |
|              |       |
| Kosofe       | Lagos |
|              |       |
| Ojo          | Lagos |
|              |       |
| Ikeja        | Lagos |
|              |       |
| Agege        | Lagos |
|              |       |
| Oshodi/Isolo | Lagos |

|                  |       |
|------------------|-------|
| Agege            | Lagos |
| Surulere         | Lagos |
| Mushin           | Lagos |
| Ojo              | Lagos |
| Oshodi/Isolo     | Lagos |
| Kosofe           | Lagos |
| Apapa            | Lagos |
| Somolu           | Lagos |
| Alimosho         | Lagos |
| Ikorodu          | Lagos |
| Badagry          | Lagos |
| Alimosho         | Lagos |
| Apapa            | Lagos |
| Alimosho         | Lagos |
| Mushin           | Lagos |
| Oshodi/Isolo     | Lagos |
| Lagos Island     | Lagos |
| Ojo              | Lagos |
| Ajeromi/Ifelodun | Lagos |
| Oshodi/Isolo     | Lagos |

|                  |       |
|------------------|-------|
| Ojo              | Lagos |
| Agege            | Lagos |
| Amuwo-Odofin     | Lagos |
| Ikeja            | Lagos |
| Ajeromi/Ifelodun | Lagos |
| Ifako-Ijaye      | Lagos |
| Ojo              | Lagos |
| Ojo              | Lagos |
| Ajeromi/Ifelodun | Lagos |
| Surulere         | Lagos |
| Kosofe           | Lagos |
| Ikorodu          | Lagos |
| Ifako-Ijaye      | Lagos |
| Ikorodu          | Lagos |
| Alimosho         | Lagos |
| Alimosho         | Lagos |
| Alimosho         | Lagos |
| Oshodi/Isolo     | Lagos |
| Ojo              | Lagos |

|                  |       |
|------------------|-------|
| Ajeromi/Ifelodun | Lagos |
| Ikeja            | Lagos |
| Alimosho         | Lagos |
| Ikeja            | Lagos |
| Kosofe           | Lagos |
| Ikorodu          | Lagos |
| Ikorodu          | Lagos |
| Mushin           | Lagos |
| Ikeja            | Lagos |
| Lagos Mainland   | Lagos |
| Kosofe           | Lagos |
| Alimosho         | Lagos |
| Ikeja            | Lagos |
| Alimosho         | Lagos |
| Surulere         | Lagos |
| Kosofe           | Lagos |
| Badagry          | Lagos |
| Badagry          | Lagos |
| Amuwo-Odofin     | Lagos |
| Ojo              | Lagos |
| Alimosho         | Lagos |



|              |       |
|--------------|-------|
| Mushin       | Lagos |
| Surulere     | Lagos |
| Agege        | Lagos |
| Alimosho     | Lagos |
| Alimosho     | Lagos |
| Oshodi/Isolo | Lagos |
| Ojo          | Lagos |
| Alimosho     | Lagos |
| Agege        | Lagos |
| Agege        | Lagos |
| Surulere     | Lagos |
| Lagos Island | Lagos |
| Surulere     | Lagos |
| Alimosho     | Lagos |
| Alimosho     | Lagos |
| Alimosho     | Lagos |
| Ikorodu      | Lagos |
| Amuwo-Odofin | Lagos |
| Epe          | Lagos |
| Alimosho     | Lagos |
| Ikorodu      | Lagos |

|                  |       |
|------------------|-------|
| Badagry          | Lagos |
| Alimosho         | Lagos |
| Ifako-Ijaye      | Lagos |
| Ifako-Ijaye      | Lagos |
| Ajeromi/Ifelodun | Lagos |
| Agege            | Lagos |
| Amuwo-Odofin     | Lagos |
| Alimosho         | Lagos |
| Ifako-Ijaye      | Lagos |
| Ikorodu          | Lagos |
| Ifako-Ijaye      | Lagos |
| Mushin           | Lagos |
| Ikorodu          | Lagos |
| Ikeja            | Lagos |
| Somolu           | Lagos |
| Alimosho         | Lagos |
| Alimosho         | Lagos |
| Ibeju/Lekki      | Lagos |
| Eti-Osa          | Lagos |
| Surulere         | Lagos |
| Agege            | Lagos |
| Badagry          | Lagos |
| Ikeja            | Lagos |
| Oshodi/Isolo     | Lagos |

|                  |       |
|------------------|-------|
| Alimosho         | Lagos |
| Alimosho         | Lagos |
| Amuwo-Odofin     | Lagos |
| Alimosho         | Lagos |
| Ikeja            | Lagos |
| Ojo              | Lagos |
| Oshodi/Isolo     | Lagos |
| Ifako-Ijaye      | Lagos |
| Ifako-Ijaye      | Lagos |
| Badagry          | Lagos |
| Kosofe           | Lagos |
| Alimosho         | Lagos |
| Amuwo-Odofin     | Lagos |
| Oshodi/Isolo     | Lagos |
| Amuwo-Odofin     | Lagos |
| Ojo              | Lagos |
| Ajeromi/Ifelodun | Lagos |
| Ajeromi/Ifelodun | Lagos |
| Alimosho         | Lagos |
| Kosofe           | Lagos |
| Kosofe           | Lagos |
| Kosofe           | Lagos |

|              |       |
|--------------|-------|
| Kosofe       | Lagos |
| Alimosho     | Lagos |
| Surulere     | Lagos |
| Oshodi/Isolo | Lagos |
| Kosofe       | Lagos |
| Ikorodu      | Lagos |
| Alimosho     | Lagos |
| Alimosho     | Lagos |
| Ojo          | Lagos |
| Oshodi/Isolo | Lagos |
| Mushin       | Lagos |
| Surulere     | Lagos |
| Eti-Osa      | Lagos |
| Amuwo-Odofin | Lagos |
| Kosofe       | Lagos |
| Ikorodu      | Lagos |
| Ikorodu      | Lagos |
| Amuwo-Odofin | Lagos |
| Ifako-Ijaye  | Lagos |
| Ikeja        | Lagos |

|              |       |
|--------------|-------|
|              |       |
| Badagry      | Lagos |
| Alimosho     | Lagos |
| Oshodi/Isolo | Lagos |
| Mushin       | Lagos |
| Eti-Osa      | Lagos |
|              |       |
| Alimosho     | Lagos |
| Alimosho     | Lagos |
|              |       |
| Badagry      | Lagos |
| Surulere     | Lagos |
| Eti-Osa      | Lagos |
| Lagos Island | Lagos |
|              |       |
| Surulere     | Lagos |
|              |       |
| Ikorodu      | Lagos |
| Kosofe       | Lagos |
| Alimosho     | Lagos |
|              |       |
| Amuwo-Odofin | Lagos |
|              |       |
| Ojo          | Lagos |
| Surulere     | Lagos |
|              |       |
| Ikorodu      | Lagos |

|             |       |
|-------------|-------|
| Ikorodu     | Lagos |
| Alimosho    | Lagos |
| Alimosho    | Lagos |
| Ikorodu     | Lagos |
| Alimosho    | Lagos |
| Ikeja       | Lagos |
| Somolu      | Lagos |
| Kosofe      | Lagos |
| Alimosho    | Lagos |
| Ikorodu     | Lagos |
| Kosofe      | Lagos |
| Ojo         | Lagos |
| Alimosho    | Lagos |
| Ifako-Ijaye | Lagos |
| Alimosho    | Lagos |
| Alimosho    | Lagos |
| Ifako-Ijaye | Lagos |
| Ikorodu     | Lagos |

|              |       |
|--------------|-------|
|              |       |
| Kosofe       | Lagos |
| Oshodi/Isolo | Lagos |
|              |       |
| Badagry      | Lagos |
|              |       |
| Ibeju/Lekki  | Lagos |
| Somolu       | Lagos |
|              |       |
| Somolu       | Lagos |
| Kosofe       | Lagos |
|              |       |
| Oshodi/Isolo | Lagos |
|              |       |
| Agege        | Lagos |
|              |       |
| Ikorodu      | Lagos |
|              |       |
| Ifako-Ijaye  | Lagos |
|              |       |
| Alimosho     | Lagos |
| Kosofe       | Lagos |
|              |       |
| Eti-Osa      | Lagos |
| Surulere     | Lagos |
|              |       |
| Surulere     | Lagos |
|              |       |
| Ibeju/Lekki  | Lagos |
| Agai         | Niger |
| Bida         | Niger |
| Bida         | Niger |
| Bida         | Niger |

|           |       |
|-----------|-------|
| Bosso     | Niger |
| Chanchaga | Niger |
| Chanchaga | Niger |
|           |       |
| Chanchaga | Niger |
|           |       |
| Chanchaga | Niger |
| Chanchaga | Niger |
|           |       |
| Chanchaga | Niger |
| Chanchaga | Niger |
| Chanchaga | Niger |
| Chanchaga | Niger |
| Chanchaga | Niger |
| Mokwa     | Niger |
| Chanchaga | Niger |
| Chanchaga | Niger |
| Kontagora | Niger |
| Kontagora | Niger |
| Lapai     | Niger |
|           |       |
| Suleja    | Niger |
| Suleja    | Niger |
| Suleja    | Niger |
| Suleja    | Niger |
|           |       |
| Suleja    | Niger |
|           |       |
| Suleja    | Niger |
|           |       |
| Suleja    | Niger |
| Wushishi  | Niger |
|           |       |
| Wushishi  | Niger |
| Gbako     | Niger |
| Mariga    | Niger |
| Magama    | Niger |
| Bosso     | Niger |
| Chanchaga | Niger |
| Bida      | Niger |
|           |       |
| Chanchaga | Niger |
| Gurara    | Niger |
| Chanchaga | Niger |
| Kontagora | Niger |
| Lapai     | Niger |
| Agaie     | Niger |







|           |       |
|-----------|-------|
| Lapai     | Niger |
| Lapai     | Niger |
| Lapai     | Niger |
| Lapai     | Niger |
| Lapai     | Niger |
| Lapai     | Niger |
| Lapai     | Niger |
| Agwara    | Niger |
| Agwara    | Niger |
| Agwara    | Niger |
| Agwara    | Niger |
| Agwara    | Niger |
| Agwara    | Niger |
| Suleja    | Niger |
|           |       |
| Suleja    | Niger |
|           |       |
| Borgu     | Niger |
| Agwara    | Niger |
|           |       |
| Agwara    | Niger |
| Bosso     | Niger |
|           |       |
| Chanchaga | Niger |
|           |       |
| Borgu     | Niger |
|           |       |
| Lapai     | Niger |
| Kontagora | Niger |
|           |       |
| Kontagora | Niger |
|           |       |
| Chanchaga | Niger |
| Lapai     | Niger |
|           |       |
| Suleja    | Niger |
| Gbako     | Niger |
|           |       |
| Kontagora | Niger |
|           |       |
| Chanchaga | Niger |
| Lapai     | Niger |
|           |       |
| Tafa      | Niger |
| Chanchaga | Niger |

|                |          |
|----------------|----------|
| Borgu          | Niger    |
| Suleja         | Niger    |
| Suleja         | Niger    |
| Chanchaga      | Niger    |
| Bosso          | Niger    |
| Suleja         | Niger    |
| Suleja         | Niger    |
| Suleja         | Niger    |
| Suleja         | Niger    |
| Suleja         | Niger    |
| Suleja         | Niger    |
| Bida           | Niger    |
| Karu           | Nasarawa |
| Keffi          | Nasarawa |
| Karu           | Nasarawa |
| Karu           | Nasarawa |
| Keffi          | Nasarawa |
| Lafia          | Nasarawa |
| Karu           | Nasarawa |
| Akwanga        | Nasarawa |
| Akwanga        | Nasarawa |
| Nasarawa Eggon | Nasarawa |
| Keana          | Nasarawa |
| Awe            | Nasarawa |
| Obi            | Nasarawa |
| Wamba          | Nasarawa |
| Lafia          | Nasarawa |
| Lafia          | Nasarawa |
| Lafia          | Nasarawa |
| Karu           | Nasarawa |
| Karu           | Nasarawa |
| Keffi          | Nasarawa |

|          |          |
|----------|----------|
| Keffi    | Nasarawa |
| Karu     | Nasarawa |
| Nasarawa | Nasarawa |
| Karu     | Nasarawa |
| Karu     | Nasarawa |
| Lafia    | Nasarawa |
| Toto     | Nasarawa |
| Nasarawa | Nasarawa |
| Nasarawa | Nasarawa |
| Nasarawa | Nasarawa |
| Keffi    | Nasarawa |
| Akwanga  | Nasarawa |
| Akwanga  | Nasarawa |
| Karu     | Nasarawa |
| Lafia    | Nasarawa |
| Karu     | Nasarawa |
| Karu     | Nasarawa |
| Karu     | Nasarawa |
| Karu     | Nasarawa |
| Keffi    | Nasarawa |
| Lafia    | Nasarawa |
| Nasarawa | Nasarawa |
| Karu     | Nasarawa |
| Karu     | Nasarawa |
| Karu     | Nasarawa |
| Karu     | Nasarawa |
| Karu     | Nasarawa |
| Karu     | Nasarawa |
| Doma     | Nasarawa |
| Karu     | Nasarawa |
| Karu     | Nasarawa |
| Karu     | Nasarawa |



|                  |      |
|------------------|------|
| Akure North      | Ondo |
| Okitipupa        | Ondo |
| Owo              | Ondo |
| Akure North      | Ondo |
| Akure North      | Ondo |
|                  |      |
| Akure North      | Ondo |
| Akure South      | Ondo |
| Akure North      | Ondo |
|                  |      |
| Akure South      | Ondo |
|                  |      |
| Akure South      | Ondo |
| Akure South      | Ondo |
|                  |      |
| Akure South      | Ondo |
| Ondo West        | Ondo |
|                  |      |
| Akure South      | Ondo |
|                  |      |
| Akure South      | Ondo |
| Ose              | Ondo |
| Okitipupa        | Ondo |
|                  |      |
| Ondo West        | Ondo |
| Ileoluji/Okeigbo | Ondo |
| Ondo West        | Ondo |
|                  |      |
| Akure South      | Ondo |
| Akure South      | Ondo |
| Ondo West        | Ondo |
| Ondo West        | Ondo |
|                  |      |
| Akure North      | Ondo |
| Akure South      | Ondo |
|                  |      |
| Akure South      | Ondo |
| Odigbo           | Ondo |
|                  |      |
| Akure South      | Ondo |
|                  |      |
| Akoko North East | Ondo |
| Ondo West        | Ondo |
|                  |      |
| Akoko North East | Ondo |
| Akure South      | Ondo |
| Ondo West        | Ondo |
| Okitipupa        | Ondo |
|                  |      |
| Ondo West        | Ondo |

|                  |      |
|------------------|------|
| Ondo West        | Ondo |
| Akure South      | Ondo |
| Akure South      | Ondo |
| Odigbo           | Ondo |
| Ileoluji/Okeigbo | Ondo |
| Akure North      | Ondo |
| Akure South      | Ondo |
| Akure South      | Ondo |
| Ilaje            | Ondo |
| Ondo West        | Ondo |
| Odigbo           | Ondo |
| Owo              | Ondo |
| Akure South      | Ondo |
| Ondo West        | Ondo |
| Akure South      | Ondo |
| Owo              | Ondo |
| Odigbo           | Ondo |
| Ondo West        | Ondo |
| Okitipupa        | Ondo |
| Akoko South West | Ondo |
| Odigbo           | Ondo |
| Akure South      | Ondo |
| Owo              | Ondo |
| Odigbo           | Ondo |
| Ondo West        | Ondo |
| Owo              | Ondo |
| Ifedore          | Ondo |



|                |      |
|----------------|------|
| Owo            | Ondo |
| Ondo West      | Ondo |
| Idanre         | Ondo |
| Akure South    | Ondo |
| Akure South    | Ondo |
| Akure South    | Ondo |
| Ondo West      | Ondo |
| Akure South    | Ondo |
| Akure South    | Ondo |
| Akure South    | Ondo |
| Owo            | Ondo |
| Odigbo         | Ondo |
| Abeokuta South | Ogun |
| Abeokuta South | Ogun |
| Ijebu Ode      | Ogun |
| Abeokuta South | Ogun |
| Abeokuta South | Ogun |
| Abeokuta North | Ogun |
| Ifo            | Ogun |
| Ijebu Ode      | Ogun |
| Abeokuta South | Ogun |
| Ado Odo-Ota    | Ogun |
| Ado Odo-Ota    | Ogun |
| Ado Odo-Ota    | Ogun |
| Ado Odo-Ota    | Ogun |
| Abeokuta North | Ogun |
| Abeokuta North | Ogun |
| Ijebu North    | Ogun |
| Egbado North   | Ogun |
| Egbado North   | Ogun |
| Abeokuta North | Ogun |
| Abeokuta South | Ogun |

|                |      |
|----------------|------|
| Ipokia         | Ogun |
|                |      |
| Abeokuta North | Ogun |
| Egbado South   | Ogun |
| Abeokuta North | Ogun |
| Ado Odo-Ota    | Ogun |
|                |      |
| Ipokia         | Ogun |
| Ado Odo-Ota    | Ogun |
| Ado Odo-Ota    | Ogun |
| Ado Odo-Ota    | Ogun |
| Ado Odo-Ota    | Ogun |
|                |      |
| Sagamu         | Ogun |
| Ado Odo-Ota    | Ogun |
|                |      |
| Abeokuta South | Ogun |
|                |      |
| Ifo            | Ogun |
|                |      |
| Ifo            | Ogun |
| Ado Odo-Ota    | Ogun |
|                |      |
| Sagamu         | Ogun |
| Abeokuta South | Ogun |
|                |      |
| Sagamu         | Ogun |
|                |      |
| Odeda          | Ogun |
| Sagamu         | Ogun |
| Ijebu Ode      | Ogun |
| Obafemi/Owode  | Ogun |
|                |      |
| Abeokuta South | Ogun |
| Abeokuta North | Ogun |
| Ado Odo-Ota    | Ogun |
| Ado Odo-Ota    | Ogun |
| Ado Odo-Ota    | Ogun |
|                |      |
| Ado Odo-Ota    | Ogun |
| Ado Odo-Ota    | Ogun |
| Ado Odo-Ota    | Ogun |
| Ado Odo-Ota    | Ogun |
| Ado Odo-Ota    | Ogun |
| Ado Odo-Ota    | Ogun |
| Ado Odo-Ota    | Ogun |
| Ado Odo-Ota    | Ogun |
| Abeokuta North | Ogun |
| Sagamu         | Ogun |
| Egbado South   | Ogun |

|                |      |
|----------------|------|
| Abeokuta North | Ogun |
| Abeokuta South | Ogun |
| Sagamu         | Ogun |
| Abeokuta South | Ogun |
| Ifo            | Ogun |
| Sagamu         | Ogun |
| Sagamu         | Ogun |
| Abeokuta South | Ogun |
| Ijebu Ode      | Ogun |
| Abeokuta South | Ogun |
| Egbado South   | Ogun |
| Abeokuta South | Ogun |
| Abeokuta South | Ogun |
| Ikenne         | Ogun |
| Ifo            | Ogun |
| Abeokuta South | Ogun |
| Ijebu Ode      | Ogun |
| Sagamu         | Ogun |
| Abeokuta North | Ogun |
| Ifo            | Ogun |
| Remo North     | Ogun |
| Ijebu Ode      | Ogun |
| Ijebu Ode      | Ogun |
| Ijebu Ode      | Ogun |
| Ifo            | Ogun |
| Ifo            | Ogun |
| Obafemi/Owode  | Ogun |

|                |      |
|----------------|------|
| Abeokuta North | Ogun |
| Abeokuta South | Ogun |
| Ado Odo-Ota    | Ogun |
| Ifo            | Ogun |
| Ijebu Ode      | Ogun |
| Ijebu Ode      | Ogun |
| Ifo            | Ogun |
| Ijebu Ode      | Ogun |
| Abeokuta South | Ogun |
| Sagamu         | Ogun |
| Ifo            | Ogun |
| Ado Odo-Ota    | Ogun |
| Obafemi/Owode  | Ogun |
| Abeokuta South | Ogun |
| Ifo            | Ogun |
| Ifo            | Ogun |
| Ikenne         | Ogun |
| Odogbolu       | Ogun |
| Ijebu Ode      | Ogun |
| Egbado South   | Ogun |
| Ado Odo-Ota    | Ogun |
| Ijebu North    | Ogun |
| Obafemi/Owode  | Ogun |
| Ifo            | Ogun |
| Abeokuta South | Ogun |
| Ifo            | Ogun |
| Ijebu East     | Ogun |
| Abeokuta South | Ogun |

|                |      |
|----------------|------|
| Abeokuta North | Ogun |
| Ijebu Ode      | Ogun |
|                |      |
| Abeokuta North | Ogun |
| Abeokuta North | Ogun |
|                |      |
| Abeokuta North | Ogun |
|                |      |
| Ado Odo-Ota    | Ogun |
| Ado Odo-Ota    | Ogun |
|                |      |
| Ado Odo-Ota    | Ogun |
|                |      |
| Sagamu         | Ogun |
|                |      |
| Ifo            | Ogun |
|                |      |
| Sagamu         | Ogun |
|                |      |
| Abeokuta North | Ogun |
|                |      |
| Ifo            | Ogun |
|                |      |
| Sagamu         | Ogun |
| Ijebu Ode      | Ogun |
|                |      |
| Abeokuta North | Ogun |
|                |      |
| Sagamu         | Ogun |
|                |      |
| Abeokuta South | Ogun |
|                |      |
| Sagamu         | Ogun |
|                |      |
| Obafemi/Owode  | Ogun |
| Obafemi/Owode  | Ogun |
|                |      |
| Abeokuta North | Ogun |

|                |      |
|----------------|------|
| Obafemi/Owode  | Ogun |
| Ado Odo-Ota    | Ogun |
| Ifo            | Ogun |
| Ijebu Ode      | Ogun |
| Abeokuta South | Ogun |
| Sagamu         | Ogun |
| Obafemi/Owode  | Ogun |
| Ifo            | Ogun |
| Obafemi/Owode  | Ogun |
| Ado Odo-Ota    | Ogun |
| Remo North     | Ogun |
| Ijebu Ode      | Ogun |
| Ado Odo-Ota    | Ogun |
| Ifo            | Ogun |
| Abeokuta South | Ogun |
| Abeokuta North | Ogun |
| Obafemi/Owode  | Ogun |
| Ijebu Ode      | Ogun |
| Ijebu Ode      | Ogun |

|                |      |
|----------------|------|
| Obafemi/Owode  | Ogun |
| Obafemi/Owode  | Ogun |
| Ifo            | Ogun |
| Ifo            | Ogun |
| Abeokuta South | Ogun |
| Ado Odo-Ota    | Ogun |
| Abeokuta South | Ogun |
| Ifo            | Ogun |
| Sagamu         | Ogun |
| Abeokuta South | Ogun |
| Ado Odo-Ota    | Ogun |
| Sagamu         | Ogun |
| Ila            | Osun |
| Ife Central    | Osun |
| Ilesa East     | Osun |
| Ilesa East     | Osun |
| Iwo            | Osun |
| Ifelodun       | Osun |
| Olorunda       | Osun |
| Osogbo         | Osun |
| Osogbo         | Osun |
| Osogbo         | Osun |
| Olorunda       | Osun |
| Olorunda       | Osun |
| Ife Central    | Osun |
| Ilesa East     | Osun |
| Ife Central    | Osun |
| Ede South      | Osun |
| Olorunda       | Osun |

|             |      |
|-------------|------|
| Isokan      | Osun |
| Osogbo      | Osun |
| Ede South   | Osun |
| Ede North   | Osun |
| Ife Central | Osun |
| Osogbo      | Osun |
| Ife East    | Osun |
| Ayedaade    | Osun |
| Ede South   | Osun |
| Ife Central | Osun |
| Ife Central | Osun |
| Olorunda    | Osun |
| Osogbo      | Osun |
| Ilesa East  | Osun |
| Irewole     | Osun |
| Ife North   | Osun |
| Olorunda    | Osun |
| Osogbo      | Osun |
| Ife Central | Osun |
| Isokan      | Osun |
| Odo-Otin    | Osun |
| Iwo         | Osun |
| Osogbo      | Osun |
| Ife Central | Osun |
| Ede South   | Osun |
| Ede North   | Osun |
| Olorunda    | Osun |
| Iwo         | Osun |
| Ifelodun    | Osun |
| Osogbo      | Osun |



|             |      |
|-------------|------|
| Osogbo      | Osun |
| Egbedore    | Osun |
| Ifelodun    | Osun |
| Olorunda    | Osun |
| Ife Central | Osun |
| Osogbo      | Osun |
| Egbedore    | Osun |
| Ife North   | Osun |
| Ife East    | Osun |
| Ifelodun    | Osun |
| Ife East    | Osun |
| Osogbo      | Osun |
| Egbedore    | Osun |
| Osogbo      | Osun |
| Ife East    | Osun |
| Ede South   | Osun |
| Ede South   | Osun |
| Egbedore    | Osun |
| Egbedore    | Osun |
| Olorunda    | Osun |
| Ede South   | Osun |
| Ifelodun    | Osun |
| Odo-Otin    | Osun |
| Egbedore    | Osun |

|                   |      |
|-------------------|------|
| Osogbo            | Osun |
| Egbedore          | Osun |
| Odo-Otin          | Osun |
| Egbedore          | Osun |
| Osogbo            | Osun |
| Osogbo            | Osun |
| Osogbo            | Osun |
| Osogbo            | Osun |
| Osogbo            | Osun |
| Ibadan North      | Oyo  |
| Ibadan North      | Oyo  |
| Ibadan North      | Oyo  |
| Ibadan North      | Oyo  |
| Ibadan North      | Oyo  |
| Ibadan North      | Oyo  |
| Ibadan North      | Oyo  |
| Ibadan North      | Oyo  |
| Ibadan North      | Oyo  |
| Ibadan North      | Oyo  |
| Ibadan North      | Oyo  |
| Ibadan North      | Oyo  |
| Ibadan North      | Oyo  |
| Ibadan North East | Oyo  |
| Ibadan North      | Oyo  |
| Ibadan South West | Oyo  |
| Ibadan South West | Oyo  |
| Ibadan South West | Oyo  |
| Ibadan South West | Oyo  |

|                   |     |
|-------------------|-----|
| Ibadan South West | Oyo |
| Ibadan South West | Oyo |
| Ibadan South West | Oyo |
| Ibadan South West | Oyo |
| Ibadan South West | Oyo |
| Ibadan North      | Oyo |
| Ibadan North      | Oyo |
| Ibadan North      | Oyo |
| Ibadan South-East | Oyo |
| Ibadan South-East | Oyo |
| Ibadan North      | Oyo |
| Ibadan South West | Oyo |
| Ibadan South West | Oyo |
| Ibadan North      | Oyo |
| Ibadan South West | Oyo |
| Ibadan North East | Oyo |
| Ibadan North      | Oyo |
| Ibadan North East | Oyo |
| Ibadan North      | Oyo |
| Ibadan South West | Oyo |
| Ibadan North East | Oyo |
| Ibadan North East | Oyo |
| Ibadan North      | Oyo |
| Ibadan North      | Oyo |
| Ibadan South West | Oyo |
| Ibadan North      | Oyo |
| Ibadan South West | Oyo |
| Ibadan North East | Oyo |
| Ibadan North      | Oyo |

|                   |     |
|-------------------|-----|
| Oyo West          | Oyo |
| Afijio            | Oyo |
|                   |     |
| Ogbomoso South    | Oyo |
| Ibadan North      | Oyo |
| Ibadan South West | Oyo |
|                   |     |
| Ibadan North      | Oyo |
|                   |     |
| Ibadan North      | Oyo |
| Saki West         | Oyo |
|                   |     |
| Ogbomoso North    | Oyo |
| Iseyin            | Oyo |
| Iseyin            | Oyo |
| Ibadan North      | Oyo |
| Ibadan South West | Oyo |
| Ibadan North      | Oyo |
| Oyo West          | Oyo |
| Ogbomoso South    | Oyo |
| Ibadan South West | Oyo |
|                   |     |
| Saki West         | Oyo |
| Saki East         | Oyo |
| Ibadan South-East | Oyo |
| Saki West         | Oyo |
| Ibadan North      | Oyo |
|                   |     |
| Ibadan North      | Oyo |
|                   |     |
| Ibadan North West | Oyo |
| Ibadan South West | Oyo |
| Ibadan North      | Oyo |
|                   |     |
| Ibadan North East | Oyo |
|                   |     |
| Ibadan South West | Oyo |
|                   |     |
| Ibadan South West | Oyo |
|                   |     |
| Ibadan South West | Oyo |
| Ibadan South West | Oyo |
|                   |     |
| Akinyele          | Oyo |
| Oyo West          | Oyo |
|                   |     |
|                   |     |
| Ibadan South-East | Oyo |
| Iseyin            | Oyo |

|                   |     |
|-------------------|-----|
| Ogbomoso North    | Oyo |
| Oyo East          | Oyo |
| Ibadan North West | Oyo |
| Ogbomoso North    | Oyo |
| Ogbomoso North    | Oyo |
| Ido               | Oyo |
| Lagelu            | Oyo |
| Egbeda            | Oyo |
| Ibadan North West | Oyo |
| Ibadan North West | Oyo |
| Ibadan North      | Oyo |
| Ogbomoso North    | Oyo |
| Ibadan South West | Oyo |
| Afijio            | Oyo |
| Ibadan North      | Oyo |
| Ibadan South West | Oyo |
| Ibadan North East | Oyo |
| Ibadan North      | Oyo |
| Ibadan North      | Oyo |
| Oyo West          | Oyo |
| Ibadan North      | Oyo |
| Ibadan North      | Oyo |
| Ibadan North West | Oyo |
| Ido               | Oyo |
| Ibadan South-East | Oyo |

|                   |     |
|-------------------|-----|
| Ibadan North West | Oyo |
| Ibadan North West | Oyo |
| Lagelu            | Oyo |
| Ibadan North      | Oyo |
| Ibadan South West | Oyo |
| Ibadan North      | Oyo |
| Ibadan North East | Oyo |
| Ibadan South West | Oyo |
| Ibadan South West | Oyo |
| Ibadan South West | Oyo |
| Ibadan North East | Oyo |
| Egbeda            | Oyo |
| Ibadan North      | Oyo |
| Ibadan South West | Oyo |
| Oluyole           | Oyo |
| Oluyole           | Oyo |
| Akinyele          | Oyo |
| Ibadan South West | Oyo |
| Ibadan North West | Oyo |
| Ibadan North      | Oyo |
| Ibadan South West | Oyo |
| Oyo West          | Oyo |
| Egbeda            | Oyo |
| Ibadan North      | Oyo |
| Ibadan South-East | Oyo |
| Ibadan South West | Oyo |

|                   |     |
|-------------------|-----|
|                   |     |
| Ido               | Oyo |
| Ibadan North      | Oyo |
| Ibadan North East | Oyo |
| Ibadan South West | Oyo |
| Ibadan North      | Oyo |
| Lagelu            | Oyo |
| Ibadan North      | Oyo |
| Ibadan North East | Oyo |
| Ibadan North      | Oyo |
| Oluyole           | Oyo |
| Ibadan North      | Oyo |
| Lagelu            | Oyo |
| Ibadan South West | Oyo |
| Ibadan South West | Oyo |
| Ibadan North      | Oyo |
| Egbeda            | Oyo |
| Akinyele          | Oyo |
| Ogbomoso South    | Oyo |
| Ogbomoso South    | Oyo |
| Ibadan South West | Oyo |
| Ibadan South-East | Oyo |
| Ibadan South-East | Oyo |
| Ibadan South-East | Oyo |
| Ibadan South-East | Oyo |
| Atiba             | Oyo |
| Atiba             | Oyo |
| Atiba             | Oyo |
| Atiba             | Oyo |
| Ogbomoso North    | Oyo |
| Ogbomoso North    | Oyo |
| Atiba             | Oyo |
| Atiba             | Oyo |
| Atiba             | Oyo |

|                   |     |
|-------------------|-----|
| Irepo             | Oyo |
|                   |     |
| Ogbomoso North    | Oyo |
| Ogbomoso North    | Oyo |
| Ogbomoso North    | Oyo |
| Ogbomoso North    | Oyo |
|                   |     |
| Ibadan North East | Oyo |
|                   |     |
| Ibadan North      | Oyo |
| Ibadan North      | Oyo |
|                   |     |
| Ibadan North      | Oyo |
|                   |     |
| Ibadan North      | Oyo |
| Ibadan North East | Oyo |
| Ibadan South-East | Oyo |
|                   |     |
| Ibadan North      | Oyo |
|                   |     |
| Oluyole           | Oyo |
| Akinyele          | Oyo |
| Ibadan South-East | Oyo |
|                   |     |
| Ibadan South-East | Oyo |
|                   |     |
| Ibadan South West | Oyo |
| Egbeda            | Oyo |
|                   |     |
| Ibadan North East | Oyo |
|                   |     |
| Ibadan South-East | Oyo |
|                   |     |
| Ibadan North      | Oyo |
|                   |     |
| Ibadan North      | Oyo |
|                   |     |
| Ibadan North      | Oyo |
|                   |     |
| Ibadan North East | Oyo |
| Ido               | Oyo |
|                   |     |
| Oluyole           | Oyo |
|                   |     |
| Lagelu            | Oyo |
|                   |     |
| Ibadan South West | Oyo |



|                   |     |
|-------------------|-----|
| Lagelu            | Oyo |
| Lagelu            | Oyo |
| Atiba             | Oyo |
| Irepo             | Oyo |
| Ibadan North      | Oyo |
| Ibadan South West | Oyo |
| Oluyole           | Oyo |
| Oluyole           | Oyo |
| Ido               | Oyo |
| Ido               | Oyo |
| Ibadan South West | Oyo |
| Ibadan North      | Oyo |
| Ido               | Oyo |
| Ido               | Oyo |
| Ibadan North West | Oyo |
| Ido               | Oyo |
| Ibadan North      | Oyo |
| Ibadan South West | Oyo |
| Ibadan South West | Oyo |
| Ibadan South West | Oyo |
| Ibadan North West | Oyo |
| Lagelu            | Oyo |

|                   |     |
|-------------------|-----|
| Ibadan North East | Oyo |
| Ibadan North      | Oyo |
| Ogbomoso North    | Oyo |
| Ibadan North East | Oyo |
| Oluyole           | Oyo |
| Ibadan South West | Oyo |
| Ibadan South West | Oyo |
| Oyo East          | Oyo |
| Akinyele          | Oyo |
| Ibadan North      | Oyo |
| Ibadan North      | Oyo |
| Ibadan South West | Oyo |
| Oluyole           | Oyo |
| Atiba             | Oyo |
| Ibadan South West | Oyo |
| Ibadan North      | Oyo |
| Ibadan South West | Oyo |
| Ibadan South West | Oyo |
| Egbeda            | Oyo |
| Ibadan South West | Oyo |
| Ibadan South West | Oyo |
| Ogbomoso South    | Oyo |
| Ibadan South West | Oyo |

|                   |         |
|-------------------|---------|
| Ibadan North      | Oyo     |
|                   |         |
| Ido               | Oyo     |
|                   |         |
| Saki West         | Oyo     |
|                   |         |
| Ido               | Oyo     |
|                   |         |
| Egbeda            | Oyo     |
|                   |         |
| Ido               | Oyo     |
|                   |         |
| Lagelu            | Oyo     |
|                   |         |
| Ogbomoso North    | Oyo     |
| Ogbomoso North    | Oyo     |
|                   |         |
| Ibadan North      | Oyo     |
|                   |         |
| Ido               | Oyo     |
|                   |         |
| Ibadan South-East | Oyo     |
|                   |         |
| Ibadan North      | Oyo     |
| Barikin Ladi      | Plateau |
| Bassa             | Plateau |
| Bokkos            | Plateau |
| Jos North         | Plateau |
| Jos North         | Plateau |
| Jos North         | Plateau |
|                   |         |
| Jos North         | Plateau |
| Jos North         | Plateau |
| Pankshin          | Plateau |
| Pankshin          | Plateau |
| Jos North         | Plateau |
| Jos North         | Plateau |
| Barikin Ladi      | Plateau |
| Shendam           | Plateau |
|                   |         |
| Jos North         | Plateau |
| Jos North         | Plateau |
| Jos North         | Plateau |
|                   |         |
| Jos North         | Plateau |

|              |         |
|--------------|---------|
| Shendam      | Plateau |
| Jos North    | Plateau |
|              |         |
| Jos North    | Plateau |
| Jos North    | Plateau |
| Pankshin     | Plateau |
| Shendam      | Plateau |
| Mangu        | Plateau |
| Barikin Ladi | Plateau |
| Jos North    | Plateau |
| Shendam      | Plateau |
| Jos North    | Plateau |
| Jos North    | Plateau |
| Jos South    | Plateau |
| Jos South    | Plateau |
| Jos North    | Plateau |
|              |         |
| Jos South    | Plateau |
| Jos North    | Plateau |
| Jos North    | Plateau |
| Jos North    | Plateau |
| Jos North    | Plateau |
| Jos South    | Plateau |
| Pankshin     | Plateau |
|              |         |
| Jos South    | Plateau |
|              |         |
| Jos North    | Plateau |
|              |         |
| Jos South    | Plateau |
| Qua'An Pan   | Plateau |
| Pankshin     | Plateau |
| Jos South    | Plateau |
|              |         |
| Jos North    | Plateau |
| Jos North    | Plateau |
|              |         |
| Jos North    | Plateau |
| Jos South    | Plateau |
| Jos South    | Plateau |
|              |         |
| Jos North    | Plateau |
| Jos South    | Plateau |
|              |         |
| Jos South    | Plateau |
| Jos North    | Plateau |
| Jos South    | Plateau |
| Jos North    | Plateau |
| Jos South    | Plateau |
|              |         |
| Jos North    | Plateau |

|                |         |
|----------------|---------|
| Jos South      | Plateau |
| Jos South      | Plateau |
| Jos South      | Plateau |
| Jos South      | Plateau |
| Bassa          | Kogi    |
| Jos South      | Plateau |
| Jos North      | Plateau |
| Pankshin       | Plateau |
| Jos South      | Plateau |
| Jos South      | Plateau |
| Jos North      | Plateau |
| Langtang North | Plateau |
| Jos North      | Plateau |
| Qua'An Pan     | Plateau |
| Mangu          | Plateau |
| Wase           | Plateau |
| Jos East       | Plateau |
| Kanam          | Plateau |
| Mikang         | Plateau |
| Mikang         | Plateau |
| Port Harcourt  | Rivers  |
| Port Harcourt  | Rivers  |
| Port Harcourt  | Rivers  |
| Obio/Akpor     | Rivers  |
| Obio/Akpor     | Rivers  |
| Port Harcourt  | Rivers  |
| Obio/Akpor     | Rivers  |

|               |        |
|---------------|--------|
|               |        |
| Obio/Akpor    | Rivers |
|               |        |
| Port Harcourt | Rivers |
| Obio/Akpor    | Rivers |
|               |        |
| Obio/Akpor    | Rivers |
| Obio/Akpor    | Rivers |
|               |        |
| Obio/Akpor    | Rivers |
|               |        |
| Obio/Akpor    | Rivers |
|               |        |
| Obio/Akpor    | Rivers |
|               |        |
| Obio/Akpor    | Rivers |
|               |        |
| Obio/Akpor    | Rivers |
|               |        |
| Obio/Akpor    | Rivers |
| Port Harcourt | Rivers |
|               |        |
| Port Harcourt | Rivers |
| Port Harcourt | Rivers |
|               |        |
| Obio/Akpor    | Rivers |
|               |        |
| Port Harcourt | Rivers |
|               |        |
| Port Harcourt | Rivers |
|               |        |
| Port Harcourt | Rivers |
|               |        |
| Port Harcourt | Rivers |
| Port Harcourt | Rivers |
|               |        |
| Port Harcourt | Rivers |
| Port Harcourt | Rivers |
| Port Harcourt | Rivers |
| Port Harcourt | Rivers |
|               |        |
| Port Harcourt | Rivers |
| Port Harcourt | Rivers |
| Port Harcourt | Rivers |
| Port Harcourt | Rivers |

|               |        |
|---------------|--------|
| Port Harcourt | Rivers |
| Port Harcourt | Rivers |
| Obio/Akpor    | Rivers |
| Port Harcourt | Rivers |
| Obio/Akpor    | Rivers |
| Obio/Akpor    | Rivers |
| Obio/Akpor    | Rivers |
| Port Harcourt | Rivers |
| Port Harcourt | Rivers |
| Port Harcourt | Rivers |
| Obio/Akpor    | Rivers |
| Port Harcourt | Rivers |
| Obio/Akpor    | Rivers |
| Obio/Akpor    | Rivers |
| Port Harcourt | Rivers |
| Obio/Akpor    | Rivers |
| Port Harcourt | Rivers |
| Port Harcourt | Rivers |
| Obio/Akpor    | Rivers |
| Port Harcourt | Rivers |
| Obio/Akpor    | Rivers |
| Obio/Akpor    | Rivers |
| Obio/Akpor    | Rivers |
| Port Harcourt | Rivers |
| Obio/Akpor    | Rivers |
| Port Harcourt | Rivers |
| Obio/Akpor    | Rivers |

|               |        |
|---------------|--------|
| Obio/Akpor    | Rivers |
| Obio/Akpor    | Rivers |
| Obio/Akpor    | Rivers |
| Port Harcourt | Rivers |
| Port Harcourt | Rivers |
| Port Harcourt | Rivers |
| Port Harcourt | Rivers |
| Port Harcourt | Rivers |
| Port Harcourt | Rivers |
| Port Harcourt | Rivers |
| Port Harcourt | Rivers |
| Obio/Akpor    | Rivers |
| Port Harcourt | Rivers |
| Port Harcourt | Rivers |
| Port Harcourt | Rivers |
| Port Harcourt | Rivers |
| Port Harcourt | Rivers |
| Port Harcourt | Rivers |
| Port Harcourt | Rivers |
| Port Harcourt | Rivers |
| Port Harcourt | Rivers |
| Port Harcourt | Rivers |
| Obio/Akpor    | Rivers |
| Obio/Akpor    | Rivers |
| Obio/Akpor    | Rivers |
| Obio/Akpor    | Rivers |
| Obio/Akpor    | Rivers |
| Obio/Akpor    | Rivers |
| Obio/Akpor    | Rivers |
| Obio/Akpor    | Rivers |
| Port Harcourt | Rivers |
| Port Harcourt | Rivers |



|                   |        |
|-------------------|--------|
| Port Harcourt     | Rivers |
| Port Harcourt     | Rivers |
| Port Harcourt     | Rivers |
| Port Harcourt     | Rivers |
| Port Harcourt     | Rivers |
| Port Harcourt     | Rivers |
| Port Harcourt     | Rivers |
| Port Harcourt     | Rivers |
| Obio/Akpor        | Rivers |
| Obio/Akpor        | Rivers |
| Obio/Akpor        | Rivers |
| Oyigbo            | Rivers |
| Port Harcourt     | Rivers |
| Port Harcourt     | Rivers |
| Port Harcourt     | Rivers |
| Oyigbo            | Rivers |
| Ogba/Egbema/Ndoni | Rivers |
| Ogba/Egbema/Ndoni | Rivers |
| Port Harcourt     | Rivers |
| Port Harcourt     | Rivers |
| Ikwerre           | Rivers |
| Port Harcourt     | Rivers |
| Port Harcourt     | Rivers |
| Obio/Akpor        | Rivers |
| Port Harcourt     | Rivers |
| Port Harcourt     | Rivers |

|                   |        |
|-------------------|--------|
| Port Harcourt     | Rivers |
|                   |        |
| Obio/Akpor        | Rivers |
|                   |        |
| Port Harcourt     | Rivers |
|                   |        |
| Port Harcourt     | Rivers |
|                   |        |
| Obio/Akpor        | Rivers |
| Port Harcourt     | Rivers |
|                   |        |
| Port Harcourt     | Rivers |
|                   |        |
| Obio/Akpor        | Rivers |
|                   |        |
| Obio/Akpor        | Rivers |
|                   |        |
| Obio/Akpor        | Rivers |
|                   |        |
| Port Harcourt     | Rivers |
|                   |        |
| Obio/Akpor        | Rivers |
|                   |        |
| Port Harcourt     | Rivers |
|                   |        |
| Obio/Akpor        | Rivers |
|                   |        |
| Obio/Akpor        | Rivers |
|                   |        |
| Ogba/Egbema/Ndoni | Rivers |
|                   |        |
| Obio/Akpor        | Rivers |
|                   |        |
| Obio/Akpor        | Rivers |
|                   |        |
| Obio/Akpor        | Rivers |
|                   |        |
| Obio/Akpor        | Rivers |
|                   |        |
| Obio/Akpor        | Rivers |

|               |        |
|---------------|--------|
| Port Harcourt | Rivers |
| Port Harcourt | Rivers |
| Obio/Akpor    | Rivers |
| Obio/Akpor    | Rivers |
| Port Harcourt | Rivers |
| Obio/Akpor    | Rivers |
| Obio/Akpor    | Rivers |
| Obio/Akpor    | Rivers |
| Obio/Akpor    | Rivers |
| Obio/Akpor    | Rivers |
| Ahoada East   | Rivers |
| Port Harcourt | Rivers |
| Port Harcourt | Rivers |
| Oyigbo        | Rivers |
| Port Harcourt | Rivers |
| Obio/Akpor    | Rivers |
| Obio/Akpor    | Rivers |
| Obio/Akpor    | Rivers |
| Obio/Akpor    | Rivers |
| Obio/Akpor    | Rivers |





|              |        |
|--------------|--------|
| S/Birni      | Sokoto |
| S/Birni      | Sokoto |
| S/Birni      | Sokoto |
| S/Birni      | Sokoto |
| S/Birni      | Sokoto |
| S/Birni      | Sokoto |
| S/Birni      | Sokoto |
| S/Birni      | Sokoto |
| S/Birni      | Sokoto |
| S/Birni      | Sokoto |
| S/Birni      | Sokoto |
| S/Birni      | Sokoto |
| S/Birni      | Sokoto |
| S/Birni      | Sokoto |
| Sokoto North | Sokoto |
| Sokoto North | Sokoto |
| Sokoto South | Sokoto |
| Sokoto South | Sokoto |
| Sokoto North | Sokoto |
| Sokoto South | Sokoto |
| Sokoto South | Sokoto |
| Wamakko      | Sokoto |
| Jalingo      | Taraba |
| Wukari       | Taraba |
| Jalingo      | Taraba |
| Jalingo      | Taraba |
| Jalingo      | Taraba |
| Wukari       | Taraba |
| Wukari       | Taraba |
| Jalingo      | Taraba |
| Wukari       | Taraba |
| Wukari       | Taraba |
| Jalingo      | Taraba |
| Zing         | Taraba |
| Jalingo      | Taraba |
| Takum        | Taraba |
| Takum        | Taraba |

|          |        |
|----------|--------|
| Takum    | Taraba |
| Takum    | Taraba |
| Jalingo  | Taraba |
| Jalingo  | Taraba |
| Bali     | Taraba |
| Sardauna | Taraba |
| Jalingo  | Taraba |
| Gassol   | Taraba |
| Wukari   | Taraba |
| Jalingo  | Taraba |
| Jalingo  | Taraba |
| Jalingo  | Taraba |
| Gashaka  | Taraba |
| Wukari   | Taraba |
| Jalingo  | Taraba |
| Wukari   | Taraba |
| Bali     | Taraba |
| Jalingo  | Taraba |
| Jalingo  | Taraba |
| Wukari   | Taraba |
| Jalingo  | Taraba |
| Jalingo  | Taraba |
| Takum    | Taraba |
| Jalingo  | Taraba |
| Bade     | Yobe   |
| Bade     | Yobe   |
| Damaturu | Yobe   |
| Damaturu | Yobe   |
| Damaturu | Yobe   |
| Damaturu | Yobe   |
| Damaturu | Yobe   |
| Gujba    | Yobe   |
| Nguru    | Yobe   |
| Potiskum | Yobe   |
| Damaturu | Yobe   |
| Geidam   | Yobe   |

|               |         |
|---------------|---------|
| Geidam        | Yobe    |
| Nguru         | Yobe    |
| Damaturu      | Yobe    |
| Damaturu      | Yobe    |
| Potiskum      | Yobe    |
| Damaturu      | Yobe    |
|               |         |
| Potiskum      | Yobe    |
| Damaturu      | Yobe    |
| Gujba         | Yobe    |
|               |         |
| Fune          | Yobe    |
| Anka          | Zamfara |
| Bakura        | Zamfara |
| Gusau         | Zamfara |
| Gusau         | Zamfara |
| Gusau         | Zamfara |
| Gusau         | Zamfara |
| Gusau         | Zamfara |
| Gusau         | Zamfara |
| Gusau         | Zamfara |
| Kaura Namoda  | Zamfara |
| Maru          | Zamfara |
| Talata Mafara | Zamfara |
| Tsafe         | Zamfara |
| Gusau         | Zamfara |
| Gusau         | Zamfara |
| Gusau         | Zamfara |
| Kaura Namoda  | Zamfara |
| Gusau         | Zamfara |
|               |         |
| Gusau         | Zamfara |
|               |         |
| Gusau         | Zamfara |
|               |         |
| Bungudu       | Zamfara |
