# Supplementary material for: Determinants and perception of health insurance participation among healthcare providers in Nigeria: A mixed-methods study
Source: PubMed Central journal article supplement (PMC8336839; doi:10.1371/journal.pone.0255206), 2021-08-04
Supplement: pone.0255206.s002.pdf [file pone.0255206.s002.pdf]

**ACTIVE SECONDARY HCP AS AT JULY 19TH 2017**

|    | HCP CODE | SEC HCP CODE | HCP NAME                                          | SERVICE TYPE | ADDRES                          | LGA       | STATE |
|----|----------|--------------|---------------------------------------------------|--------------|---------------------------------|-----------|-------|
| 1  | AB/0001  | AB/0001/S/3  | Sancta Maria Specialist & Mat.                    |              | 22 Constitution Crescent<br>Aba | Aba South | Abia  |
| 2  | AB/0004  | AB/0004/S/3  | Abia State University<br>Teaching Hospital        |              | Aba                             | Aba South | Abia  |
| 3  | AB/0004  | AB/0004/S/7  | Abia State University<br>Teaching Hospital        |              | Aba                             | Aba South | Abia  |
| 4  | AB/0004  | AB/0004/S/4  | Abia State University<br>Teaching Hospital        |              | Aba                             | Aba South | Abia  |
| 5  | AB/0004  | AB/0004/S/6  | Abia State University<br>Teaching Hospital        |              | Aba                             | Aba South | Abia  |
| 6  | AB/0004  | AB/0004/S/5  | Abia State University<br>Teaching Hospital        |              | Aba                             | Aba South | Abia  |
| 7  | AB/0004  | AB/0004/S/2  | Abia State University<br>Teaching Hospital        |              | Aba                             | Aba South | Abia  |
| 8  | AB/0004  | AB/0004/S/1  | Abia State University<br>Teaching Hospital        |              | Aba                             | Aba South | Abia  |
| 9  | AB/0005  | AB/0005/S/5  | Life Care Clinics Ltd                             |              | 8, Ezinkwu Street, Aba          | Aba South | Abia  |
| 10 | AB/0005  | AB/0005/S/3  | Life Care Clinics Ltd                             |              | 8, Ezinkwu Street, Aba          | Aba South | Abia  |
| 11 | AB/0005  | AB/0005/S/1  | Life Care Clinics Ltd                             |              | 8, Ezinkwu Street, Aba          | Aba South | Abia  |
| 12 | AB/0006  | AB/0006/S/1  | New Era Specialist<br>Hospital                    |              | 213/215 Ezikiwe Road, Aba       | Aba South | Abia  |
| 13 | AB/0006  | AB/0006/S/8  | New Era Specialist<br>Hospital                    |              | 213/215 Ezikiwe Road, Aba       | Aba South | Abia  |
| 14 | AB/0006  | AB/0006/S/2  | New Era Specialist<br>Hospital                    |              | 213/215 Ezikiwe Road, Aba       | Aba South | Abia  |
| 15 | AB/0006  | AB/0006/S/7  | New Era Specialist<br>Hospital                    |              | 213/215 Ezikiwe Road, Aba       | Aba South | Abia  |
| 16 | AB/0006  | AB/0006/S/5  | New Era Specialist<br>Hospital                    |              | 213/215 Ezikiwe Road, Aba       | Aba South | Abia  |
| 17 | AB/0006  | AB/0006/S/3  | New Era Specialist<br>Hospital                    |              | 213/215 Ezikiwe Road, Aba       | Aba South | Abia  |
| 18 | AB/0014  | AB/0014/S/3  | Federal Medical<br>Centre, Umuahia                |              | Umuahia, Abia State             | Aba North | Abia  |
| 19 | AB/0014  | AB/0014/S/4  | Federal Medical<br>Centre, Umuahia                |              | Umuahia, Abia State             | Aba North | Abia  |
| 20 | AB/0014  | AB/0014/S/7  | Federal Medical<br>Centre, Umuahia                |              | Umuahia, Abia State             | Aba North | Abia  |
| 21 | AB/0014  | AB/0014/S/1  | Federal Medical<br>Centre, Umuahia                |              | Umuahia, Abia State             | Aba North | Abia  |
| 22 | AB/0014  | AB/0014/S/2  | Federal Medical<br>Centre, Umuahia                |              | Umuahia, Abia State             | Aba North | Abia  |
| 23 | AB/0014  | AB/0014/S/5  | Federal Medical<br>Centre, Umuahia                |              | Umuahia, Abia State             | Aba North | Abia  |
| 24 | AB/0014  | AB/0014/S/6  | Federal Medical<br>Centre, Umuahia                |              | Umuahia, Abia State             | Aba North | Abia  |
| 25 | AB/0014  | AB/0014/S/8  | Federal Medical<br>Centre, Umuahia                |              | Umuahia, Abia State             | Aba North | Abia  |
| 26 | AB/0014  | AB/0014/S/15 | Federal Medical<br>Centre, Umuahia                |              | Umuahia, Abia State             | Aba North | Abia  |
| 27 | AB/0019  | AB/0019/S/6  | Mendel Hospital &<br>Diagnostic Centre<br>Limited |              | 20 Tenant Road, Abia            | Aba South | Abia  |
| 28 | AB/0019  | AB/0019/S/5  | Mendel Hospital &<br>Diagnostic Centre<br>Limited |              | 20 Tenant Road, Abia            | Aba South | Abia  |
| 29 | AB/0019  | AB/0019/S/3  | Mendel Hospital &<br>Diagnostic Centre<br>Limited |              | 20 Tenant Road, Abia            | Aba South | Abia  |
| 30 | AB/0020  | AB/0020/S/3  | Clehansan Hospital &<br>Maternity                 |              | 17 Osusu Rd, Aba.               | Aba South | Abia  |
| 31 | AB/0022  | AB/0022/S/6  | Alpha Inland Hospital                             |              | 36 Glass Industry Road, Aba     | Obingwa   | Abia  |
| 32 | AB/0023  | AB/0023/S/3  | Todac Clinic Ltd.                                 |              | 59/61 Okigwe Road, Aba          | Aba North | Abia  |
| 33 | AB/0023  | AB/0023/S/5  | Todac Clinic Ltd.                                 |              | 59/61 Okigwe Road, Aba          | Aba North | Abia  |
| 34 | AB/0023  | AB/0023/S/1  | Todac Clinic Ltd.                                 |              | 59/61 Okigwe Road, Aba          | Aba North | Abia  |
| 35 | AB/0023  | AB/0023/S/14 | Todac Clinic Ltd.                                 |              | 59/61 Okigwe Road, Aba          | Aba North | Abia  |
| 36 | AB/0023  | AB/0023/S/6  | Todac Clinic Ltd.                                 |              | 59/61 Okigwe Road, Aba          | Aba North | Abia  |
| 37 | AB/0024  | AB/0024/S/4  | Living Word Hospital                              |              | 5/7 Umuocham Street, Aba        | Aba South | Abia  |
| 38 | AB/0024  | AB/0024/S/6  | Living Word Hospital                              |              | 5/7 Umuocham Street, Aba        | Aba South | Abia  |
| 39 | AB/0024  | AB/0024/S/3  | Living Word Hospital                              |              | 5/7 Umuocham Street, Aba        | Aba South | Abia  |
| 40 | AB/0024  | AB/0024/S/2  | Living Word Hospital                              |              | 5/7 Umuocham Street, Aba        | Aba South | Abia  |
| 41 | AB/0024  | AB/0024/S/1  | Living Word Hospital                              |              | 5/7 Umuocham Street, Aba        | Aba South | Abia  |
| 42 | AB/0024  | AB/0024/S/7  | Living Word Hospital                              |              | 5/7 Umuocham Street, Aba        | Aba South | Abia  |

|    |         |              |                                     |                                                               |                                       |               |      |
|----|---------|--------------|-------------------------------------|---------------------------------------------------------------|---------------------------------------|---------------|------|
| 43 | AB/0025 | AB/0025/S/5  | Living Word Hospital                |                                                               | 117 Ikot Ekpene Road, Aba             | Obingwa       | Abia |
| 44 | AB/0025 | AB/0025/S/10 | Living Word Hospital                |                                                               | 117 Ikot Ekpene Road, Aba             | Obingwa       | Abia |
| 45 | AB/0025 | AB/0025/S/6  | Living Word Hospital                |                                                               | 117 Ikot Ekpene Road, Aba             | Obingwa       | Abia |
| 46 | AB/0025 | AB/0025/S/3  | Living Word Hospital                |                                                               | 117 Ikot Ekpene Road, Aba             | Obingwa       | Abia |
| 47 | AB/0028 | AB/0028/S/1  | Horstman Hospital                   |                                                               | 32, Okigwe Road, Aba                  | Aba North     | Abia |
| 48 | AB/0028 | AB/0028/S/7  | Horstman Hospital                   |                                                               | 32, Okigwe Road, Aba                  | Aba North     | Abia |
| 49 | AB/0028 | AB/0028/S/11 | Horstman Hospital                   |                                                               | 32, Okigwe Road, Aba                  | Aba North     | Abia |
| 50 | AB/0028 | AB/0028/S/10 | Horstman Hospital                   |                                                               | 32, Okigwe Road, Aba                  | Aba North     | Abia |
| 51 | AB/0031 | AB/0031/S/1  | Austin Grace Hospital               | -                                                             | 16, Okigwe Road, Aba                  | Aba North     | Abia |
| 52 | AB/0031 | AB/0031/S/2  | Austin Grace Hospital               | -                                                             | 16, Okigwe Road, Aba                  | Aba North     | Abia |
| 53 | AB/0034 | AB/0034/S/1  | St. Paul Hospital                   |                                                               | 6-12 St. Paul's Road, Umunggasi, Aba  | Aba South     | Abia |
| 54 | AB/0034 | AB/0034/S/5  | St. Paul Hospital                   |                                                               | 6-12 St. Paul's Road, Umunggasi, Aba  | Aba South     | Abia |
| 55 | AB/0035 | AB/0035/S/4  | Seven Days Adventist Hospital       |                                                               | Umuoba Road, Aba                      | Aba North     | Abia |
| 56 | AB/0038 | AB/0038/S/2  | Hammersmith Medical Centre          |                                                               | Plots 3 Amauzkwu Layout, Umuahia      | Umuahia North | Abia |
| 57 | AB/0041 | AB/0041/S/3  | New Era Hospital & Maternity        |                                                               | 90b Oji River Street Umuzukwu Layout  | Aba South     | Abia |
| 58 | AB/0059 | AB/0059/S/4  | Bencare Pharmacy Nig. Ltd.          | Pharmacy                                                      | 26 Faulks Road, Aba                   | Aba South     | Abia |
| 59 | AB/0060 | AB/0060/S/4  | Banthas Pharmacy & Stores Ltd.      | Pharmacy                                                      | 93, Okigwe Road, Aba                  | Aba North     | Abia |
| 60 | AB/0062 | AB/0062/S/4  | Ceeje Pharmacy                      | Pharmacy                                                      | Mbalse Owerri Road, Aba               | Aba South     | Abia |
| 61 | AB/0064 | AB/0064/S/4  | Elegance Pharmacy                   | Pharmacy                                                      | 37 Jubilee Road, Aba                  | Aba North     | Abia |
| 62 | AB/0065 | AB/0065/S/4  | Cinta Pharmacy                      | Pharmacy                                                      | 1 Okigwe Road, Aba                    | Aba South     | Abia |
| 63 | AB/0067 | AB/0067/S/4  | Diamond Pharmacy Chemist Ltd.       | Pharmacy                                                      | 2 Umule Street Off Faulk Road, Aba    | Aba South     | Abia |
| 64 | AB/0069 | AB/0069/S/4  | Fatiwa Pharmacy Ltd.                | Pharmacy                                                      | 62, Aba Owo Road, Aba                 | Aba North     | Abia |
| 65 | AB/0071 | AB/0071/S/4  | Rufus Obi Chemist Ltd.              | Pharmacy                                                      | Rochem House 140 Aba-Owerri Road, Aba | Aba South     | Abia |
| 66 | AB/0073 | AB/0073/S/4  | Em-Chemists Ltd.                    | Pharmacy                                                      | 79 Aba -Owerri Road, Aba              | Aba South     | Abia |
| 67 | AB/0084 | AB/0084/S/5  | Streamlight Biomedical Lab.         | Laboratory                                                    | 49C Umuahia Road, Aba                 | Aba North     | Abia |
| 68 | AB/0085 | AB/0085/S/5  | Steve Fort Medical Lab. Services    | Laboratory                                                    | 30 Jubilee Road, Aba                  | Aba North     | Abia |
| 69 | AB/0086 | AB/0086/S/5  | Excellence Medical Diag. Lab.       | Laboratory                                                    | 1 Okigwe Road, Aba                    | Aba South     | Abia |
| 70 | AB/0087 | AB/0087/S/5  | Taag Medical Laboratory             | Laboratory                                                    | 2 Bende Road, Umuahia                 | Umuahia North | Abia |
| 71 | AB/0088 | AB/0088/S/5  | Gardenia Laboratory Nig. Ltd.       | Laboratory                                                    | 2 Ohafia Street, Umuahia              | Umuahia North | Abia |
| 72 | AB/0093 | AB/0093/S/5  | Police Hospital, Umuahia            |                                                               | Abia State Police Command, Abia State | Aba North     | Abia |
| 73 | AB/0093 | AB/0093/S/4  | Police Hospital, Umuahia            |                                                               | Abia State Police Command, Abia State | Aba North     | Abia |
| 74 | AB/0100 | AB/0100/S/1  | St. Anthonys Hospital Ltd.          | Gen. surgery, Laboratory, Radiology, Orthopaedics, Ultrasound | 62/80 Etshe Road, Aba, Abia State     | Aba North     | Abia |
| 75 | AB/0100 | AB/0100/S/14 | St. Anthonys Hospital Ltd.          | Gen. surgery, Laboratory, Radiology, Orthopaedics, Ultrasound | 62/80 Etshe Road, Aba, Abia State     | Aba North     | Abia |
| 76 | AB/0100 | AB/0100/S/10 | St. Anthonys Hospital Ltd.          | Gen. surgery, Laboratory, Radiology, Orthopaedics, Ultrasound | 62/80 Etshe Road, Aba, Abia State     | Aba North     | Abia |
| 77 | AB/0100 | AB/0100/S/7  | St. Anthonys Hospital Ltd.          | Gen. surgery, Laboratory, Radiology, Orthopaedics, Ultrasound | 62/80 Etshe Road, Aba, Abia State     | Aba North     | Abia |
| 78 | AB/0100 | AB/0100/S/5  | St. Anthonys Hospital Ltd.          | Gen. surgery, Laboratory, Radiology, Orthopaedics, Ultrasound | 62/80 Etshe Road, Aba, Abia State     | Aba North     | Abia |
| 79 | AB/0101 | AB/0101/S/3  | The Nasareth Clinics                | O&G                                                           | 57 Pound Road, Aba                    | Aba North     | Abia |
| 80 | AB/0102 | AB/0102/S/5  | New Covenant Med. Lab. & Blood Bank | Laboratory                                                    | 8 Okigwe Road, Aba, Abia State        | Aba South     | Abia |
| 81 | AB/0103 | AB/0103/S/4  | Adamor Nig. Ltd                     | Pharmacy                                                      | 44 Okigwe Road, Aba, Abia State       | Aba South     | Abia |

|     |         |              |                                                              |                              |                                                  |               |      |
|-----|---------|--------------|--------------------------------------------------------------|------------------------------|--------------------------------------------------|---------------|------|
| 82  | AB/0104 | AB/0104/S/4  | National Root Crops Research Institute Staff Clinic, Umudike |                              | Umudike, Umuahia                                 | Umuahia South | Abia |
| 83  | AB/0107 | AB/0107/S/1  | Healing Cross Hospital                                       |                              | Kilometre 2 Bende Road, Umuahia, Abia State      | Umuahia North | Abia |
| 84  | AB/0107 | AB/0107/S/5  | Healing Cross Hospital                                       |                              | Kilometre 2 Bende Road, Umuahia, Abia State      | Umuahia North | Abia |
| 85  | AB/0110 | AB/0110/S/2  | Aloma specialist hospital                                    |                              | 9(108) aba road, umuahia                         | Umuahia North | Abia |
| 86  | AB/0126 | AB/0126/S/3  | BESTCARE SPEC. HOSPITAL & MATERNITY                          | O & G                        | 6 MADUKWE CLOSE OFF AHUNANYA AVE; UMUNGASI ABA   | Osisioma      | Abia |
| 87  | AB/0128 | AB/0128/S/3  | DENNIS BLESSING HOSPITAL                                     | O & G                        | 15 OHAFIA STR, UMUAHIA                           | Umuahia North | Abia |
| 88  | AB/0129 | AB/0129/S/4  | ENKAL PHARMACY                                               | Pharmacy                     | AHABA JUNCTION                                   | Isuikwuato    | Abia |
| 89  | AB/0139 | AB/0139/S/3  | ST. ANTHONY's HOSPITAL                                       | O & G, Dental, OPHTHALMOLOGY | 62-80 ETCHE RD, ABA                              | Aba South     | Abia |
| 90  | AB/0139 | AB/0139/S/8  | ST. ANTHONY's HOSPITAL                                       | O & G, Dental, OPHTHALMOLOGY | 62-80 ETCHE RD, ABA                              | Aba South     | Abia |
| 91  | AB/0139 | AB/0139/S/15 | ST. ANTHONY's HOSPITAL                                       | O & G, Dental, OPHTHALMOLOGY | 62-80 ETCHE RD, ABA                              | Aba South     | Abia |
| 92  | AB/0145 | AB/0145/S/5  | Michael Okpara University of Agriculture Medical Centre      |                              | Umudike,                                         | Umuahia South | Abia |
| 93  | AB/0145 | AB/0145/S/11 | Michael Okpara University of Agriculture Medical Centre      |                              | Umudike,                                         | Umuahia South | Abia |
| 94  | AB/0145 | AB/0145/S/15 | Michael Okpara University of Agriculture Medical Centre      |                              | Umudike,                                         | Umuahia South | Abia |
| 95  | AB/0145 | AB/0145/S/4  | Michael Okpara University of Agriculture Medical Centre      |                              | Umudike,                                         | Umuahia South | Abia |
| 96  | AB/0145 | AB/0145/S/7  | Michael Okpara University of Agriculture Medical Centre      |                              | Umudike,                                         | Umuahia South | Abia |
| 97  | AB/0150 | AB/0150/S/2  | Chukwuebuka Hospital                                         |                              | 50 School Road, Umuahia                          | Umuahia North | Abia |
| 98  | AB/0152 | AB/0152/S/3  | The Nazareth Clinics                                         | O&G, Paediatrics             | 57 Pound Road, Aba. Abia State                   | Aba South     | Abia |
| 99  | AB/0152 | AB/0152/S/6  | The Nazareth Clinics                                         | O&G, Paediatrics             | 57 Pound Road, Aba. Abia State                   | Aba South     | Abia |
| 100 | AB/0153 | AB/0153/S/1  | Ngozi Hospital                                               | General Surgery              | 2 Isuochi Close, Umuahia                         | Umuahia North | Abia |
| 101 | AB/0171 | AB/0171/S/2  | Madonna Catholic Hospital                                    |                              | Ohokobe Afaraukwu, Aba Road, Umuahia, Abia State | Umuahia North | Abia |
| 102 | AB/0171 | AB/0171/S/4  | Madonna Catholic Hospital                                    |                              | Ohokobe Afaraukwu, Aba Road, Umuahia, Abia State | Umuahia North | Abia |
| 103 | AB/0171 | AB/0171/S/3  | Madonna Catholic Hospital                                    |                              | Ohokobe Afaraukwu, Aba Road, Umuahia, Abia State | Umuahia North | Abia |
| 104 | AB/0171 | AB/0171/S/1  | Madonna Catholic Hospital                                    |                              | Ohokobe Afaraukwu, Aba Road, Umuahia, Abia State | Umuahia North | Abia |
| 105 | AB/0171 | AB/0171/S/5  | Madonna Catholic Hospital                                    |                              | Ohokobe Afaraukwu, Aba Road, Umuahia, Abia State | Umuahia North | Abia |
| 106 | AB/0176 | AB/0176/S/2  | Chukwuebuka Hospital                                         |                              | 50,School Road Umuahia, Abia State               | Umuahia North | Abia |
| 107 | AB/0178 | AB/0178/S/13 | Global Eye Clinic                                            |                              | 8-12 Umuka Road Umungasi, Abia State             | Osisioma      | Abia |
| 108 | AB/0179 | AB/0179/S/3  | Impact Hospital & Maternity                                  |                              | 59B Ukaegbu Road OgborHills, Abia State          | Aba North     | Abia |
| 109 | AB/0181 | AB/0181/S/1  | Cottage Hospital Azumiri                                     |                              | Azumiri, Abia State                              | Ukwa East     | Abia |
| 110 | AB/0182 | AB/0182/S/5  | Nigerian Christian Hospital Nlangu                           |                              | Km 18, Aba-Ekot-Ekpene Road Aba Abia State       | Obingwa       | Abia |
| 111 | AB/0182 | AB/0182/S/2  | Nigerian Christian Hospital Nlangu                           |                              | Km 18, Aba-Ekot-Ekpene Road Aba Abia State       | Obingwa       | Abia |
| 112 | AB/0182 | AB/0182/S/6  | Nigerian Christian Hospital Nlangu                           |                              | Km 18, Aba-Ekot-Ekpene Road Aba Abia State       | Obingwa       | Abia |
| 113 | AB/0182 | AB/0182/S/3  | Nigerian Christian Hospital Nlangu                           |                              | Km 18, Aba-Ekot-Ekpene Road Aba Abia State       | Obingwa       | Abia |
| 114 | AB/0182 | AB/0182/S/15 | Nigerian Christian Hospital Nlangu                           |                              | Km 18, Aba-Ekot-Ekpene Road Aba Abia State       | Obingwa       | Abia |
| 115 | AB/0182 | AB/0182/S/1  | Nigerian Christian Hospital Nlangu                           |                              | Km 18, Aba-Ekot-Ekpene Road Aba Abia State       | Obingwa       | Abia |
| 116 | AB/0182 | AB/0182/S/7  | Nigerian Christian Hospital Nlangu                           |                              | Km 18, Aba-Ekot-Ekpene Road Aba Abia State       | Obingwa       | Abia |

|     |         |              |                                                             |  |                                                                                                    |                   |         |
|-----|---------|--------------|-------------------------------------------------------------|--|----------------------------------------------------------------------------------------------------|-------------------|---------|
| 117 | AB/0184 | AB/0184/S/5  | Life Essential & Maternity                                  |  | 32, Uyo Street, by Okigwe road, Umuahia                                                            | Umuahia North     | Abia    |
| 118 | AB/0186 | AB/0186/S/5  | Police Hospital                                             |  | Bendel Road Umuahia Abia State                                                                     | Umuahia North     | Abia    |
| 119 | AB/0186 | AB/0186/S/4  | Police Hospital                                             |  | Bendel Road Umuahia Abia State                                                                     | Umuahia North     | Abia    |
| 120 | AB/0189 | AB/0189/S/15 | Federal Medical Centre                                      |  | Umuahia Abia State                                                                                 | Umuahia North     | Abia    |
| 121 | AB/0189 | AB/0189/S/8  | Federal Medical Centre                                      |  | Umuahia Abia State                                                                                 | Umuahia North     | Abia    |
| 122 | AB/0190 | AB/0190/S/3  | Uzondu Polyclinic                                           |  | 8 Ofali Agwu Road Amaekpu Ohafia, Abia State                                                       | Ohafia            | Abia    |
| 123 | AB/0191 | AB/0191/S/13 | Exxelli Vision Eye Clinic                                   |  | 6 Aba Road Umuahia Abia State                                                                      | Umuahia North     | Abia    |
| 124 | AB/0196 | AB/0196/S/4  | Seven Days Adventist Hospital                               |  | 1 New Umuahia Road Aba, Abia State                                                                 | Aba North         | Abia    |
| 125 | AB/0198 | AB/0198/S/5  | Quickhealth Specialist Clinic                               |  | 2 Nwadinobi Street, off BCA Road, Umuahia Abia State                                               | Aba North         | Abia    |
| 126 | AB/0201 | AB/0201/S/13 | Dominion Hospital & Maternity                               |  | 9A Sunny Lane, off Azuka Drive, Ogbor Hill, Aba Abia State                                         | Aba North         | Abia    |
| 127 | AB/0202 | AB/0202/S/4  | Christ De King Health Services Ltd                          |  | 9 Orié Ngodo, Isuochi. Abia State                                                                  | Umu - Nneochi     | Abia    |
| 128 | AB/0202 | AB/0202/S/5  | Christ De King Health Services Ltd                          |  | 9 Orié Ngodo, Isuochi. Abia State                                                                  | Umu - Nneochi     | Abia    |
| 129 | AB/0203 | AB/0203/S/5  | Calif Specialist Hospital                                   |  | 25/27 Chief Adiuoku Street, By Dip Gold Filling Station, Off Enugu -PH Express Way, Aba Abia State | Osioma            | Abia    |
| 130 | AB/0203 | AB/0203/S/3  | Calif Specialist Hospital                                   |  | 25/27 Chief Adiuoku Street, By Dip Gold Filling Station, Off Enugu -PH Express Way, Aba Abia State | Osioma            | Abia    |
| 131 | AB/0208 | AB/0208/S/5  | Quickhealth Specialist Clinic                               |  | 2 Nwadinobi Street, off BCA Road, Umuahia Abia State                                               | Umuahia North     | Abia    |
| 132 | AB/0211 | AB/0211/S/15 | Embassy Specialist & maternity Care Ltd.                    |  | No. 59c Ayaba Umueze Road, Opp. ABSUTH, second gate, Aba.                                          | Osioma            | Abia    |
| 133 | AB/0212 | AB/0212/S/13 | Parker Eye Clinic.                                          |  | No. 30 Macaulay street, off Azikiwe road, Umuahia.                                                 | Umuahia North     | Abia    |
| 134 | AB/0213 | AB/0213/S/15 | All Saints Hospital                                         |  | No. 26 Item street Umuahia.                                                                        | Umuahia North     | Abia    |
| 135 | AB/0214 | AB/0214/S/15 | St. Anthony Hospital Ltd.                                   |  | No. 52-80 Etche Road, Aba.                                                                         | Aba South         | Abia    |
| 136 | AB/0214 | AB/0214/S/8  | St. Anthony Hospital Ltd.                                   |  | No. 52-80 Etche Road, Aba.                                                                         | Aba South         | Abia    |
| 137 | AB/0214 | AB/0214/S/4  | St. Anthony Hospital Ltd.                                   |  | No. 52-80 Etche Road, Aba.                                                                         | Aba South         | Abia    |
| 138 | AB/0214 | AB/0214/S/5  | St. Anthony Hospital Ltd.                                   |  | No. 52-80 Etche Road, Aba.                                                                         | Aba South         | Abia    |
| 139 | AB/0214 | AB/0214/S/1  | St. Anthony Hospital Ltd.                                   |  | No. 52-80 Etche Road, Aba.                                                                         | Aba South         | Abia    |
| 140 | AB/0214 | AB/0214/S/7  | St. Anthony Hospital Ltd.                                   |  | No. 52-80 Etche Road, Aba.                                                                         | Aba South         | Abia    |
| 141 | AB/0215 | AB/0215/S/15 | Pamel Eze Global Foundation{PEGF}                           |  | Umuosu Umuna Nsulu Ngwa                                                                            | Isiala Ngwa North | Abia    |
| 142 | AB/0217 | AB/0217/S/1  | Samcon Friends Mission Hospital and Motherless Babies Home. |  | Mgboko Ohokobe                                                                                     | Obingwa           | Abia    |
| 143 | AB/0217 | AB/0217/S/3  | Samcon Friends Mission Hospital and Motherless Babies Home. |  | Mgboko Ohokobe                                                                                     | Obingwa           | Abia    |
| 144 | AD/0002 | AD/0002/S/4  | General Hospital, Ganye                                     |  | Ganye, Adamawa State                                                                               | Ganye             | Adamawa |
| 145 | AD/0002 | AD/0002/S/2  | General Hospital, Ganye                                     |  | Ganye, Adamawa State                                                                               | Ganye             | Adamawa |
| 146 | AD/0002 | AD/0002/S/8  | General Hospital, Ganye                                     |  | Ganye, Adamawa State                                                                               | Ganye             | Adamawa |
| 147 | AD/0002 | AD/0002/S/3  | General Hospital, Ganye                                     |  | Ganye, Adamawa State                                                                               | Ganye             | Adamawa |
| 148 | AD/0002 | AD/0002/S/7  | General Hospital, Ganye                                     |  | Ganye, Adamawa State                                                                               | Ganye             | Adamawa |
| 149 | AD/0002 | AD/0002/S/6  | General Hospital, Ganye                                     |  | Ganye, Adamawa State                                                                               | Ganye             | Adamawa |
| 150 | AD/0002 | AD/0002/S/1  | General Hospital, Ganye                                     |  | Ganye, Adamawa State                                                                               | Ganye             | Adamawa |
| 151 | AD/0002 | AD/0002/S/15 | General Hospital, Ganye                                     |  | Ganye, Adamawa State                                                                               | Ganye             | Adamawa |
| 152 | AD/0006 | AD/0006/S/5  | Cottage Hospital, Mayo-Belwa                                |  | Mayo-Belwa                                                                                         | Mayo - Belwa      | Adamawa |
| 153 | AD/0006 | AD/0006/S/2  | Cottage Hospital, Mayo-Belwa                                |  | Mayo-Belwa                                                                                         | Mayo - Belwa      | Adamawa |

|     |         |              |                              |  |                                                                           |              |         |
|-----|---------|--------------|------------------------------|--|---------------------------------------------------------------------------|--------------|---------|
| 154 | AD/0006 | AD/0006/S/1  | Cottage Hospital, Mayo-Belwa |  | Mayo-Belwa                                                                | Mayo - Belwa | Adamawa |
| 155 | AD/0013 | AD/0013/S/4  | General Hospital, Numan      |  | Numan                                                                     | Numan        | Adamawa |
| 156 | AD/0013 | AD/0013/S/7  | General Hospital, Numan      |  | Numan                                                                     | Numan        | Adamawa |
| 157 | AD/0013 | AD/0013/S/8  | General Hospital, Numan      |  | Numan                                                                     | Numan        | Adamawa |
| 158 | AD/0013 | AD/0013/S/1  | General Hospital, Numan      |  | Numan                                                                     | Numan        | Adamawa |
| 159 | AD/0013 | AD/0013/S/2  | General Hospital, Numan      |  | Numan                                                                     | Numan        | Adamawa |
| 160 | AD/0015 | AD/0015/S/1  | Cottage Hospital, Song       |  | Song                                                                      | Song         | Adamawa |
| 161 | AD/0015 | AD/0015/S/2  | Cottage Hospital, Song       |  | Song                                                                      | Song         | Adamawa |
| 162 | AD/0015 | AD/0015/S/5  | Cottage Hospital, Song       |  | Song                                                                      | Song         | Adamawa |
| 163 | AD/0017 | AD/0017/S/6  | Specialist Hospital, Yola    |  | Yola                                                                      | Yola North   | Adamawa |
| 164 | AD/0017 | AD/0017/S/11 | Specialist Hospital, Yola    |  | Yola                                                                      | Yola North   | Adamawa |
| 165 | AD/0017 | AD/0017/S/9  | Specialist Hospital, Yola    |  | Yola                                                                      | Yola North   | Adamawa |
| 166 | AD/0017 | AD/0017/S/10 | Specialist Hospital, Yola    |  | Yola                                                                      | Yola North   | Adamawa |
| 167 | AD/0017 | AD/0017/S/3  | Specialist Hospital, Yola    |  | Yola                                                                      | Yola North   | Adamawa |
| 168 | AD/0017 | AD/0017/S/8  | Specialist Hospital, Yola    |  | Yola                                                                      | Yola North   | Adamawa |
| 169 | AD/0017 | AD/0017/S/1  | Specialist Hospital, Yola    |  | Yola                                                                      | Yola North   | Adamawa |
| 170 | AD/0017 | AD/0017/S/7  | Specialist Hospital, Yola    |  | Yola                                                                      | Yola North   | Adamawa |
| 171 | AD/0017 | AD/0017/S/15 | Specialist Hospital, Yola    |  | Yola                                                                      | Yola North   | Adamawa |
| 172 | AD/0017 | AD/0017/S/2  | Specialist Hospital, Yola    |  | Yola                                                                      | Yola North   | Adamawa |
| 173 | AD/0017 | AD/0017/S/4  | Specialist Hospital, Yola    |  | Yola                                                                      | Yola North   | Adamawa |
| 174 | AD/0017 | AD/0017/S/5  | Specialist Hospital, Yola    |  | Yola                                                                      | Yola North   | Adamawa |
| 175 | AD/0019 | AD/0019/S/1  | Triumph Medical Clinic       |  | Mubi Road, Jimeta                                                         | Yola North   | Adamawa |
| 176 | AD/0019 | AD/0019/S/7  | Triumph Medical Clinic       |  | Mubi Road, Jimeta                                                         | Yola North   | Adamawa |
| 177 | AD/0019 | AD/0019/S/3  | Triumph Medical Clinic       |  | Mubi Road, Jimeta                                                         | Yola North   | Adamawa |
| 178 | AD/0019 | AD/0019/S/2  | Triumph Medical Clinic       |  | Mubi Road, Jimeta                                                         | Yola North   | Adamawa |
| 179 | AD/0019 | AD/0019/S/5  | Triumph Medical Clinic       |  | Mubi Road, Jimeta                                                         | Yola North   | Adamawa |
| 180 | AD/0020 | AD/0020/S/2  | Matco Clinic                 |  | Army Barracks Road, Malamre, Yola                                         | Yola North   | Adamawa |
| 181 | AD/0020 | AD/0020/S/4  | Matco Clinic                 |  | Army Barracks Road, Malamre, Yola                                         | Yola North   | Adamawa |
| 182 | AD/0020 | AD/0020/S/5  | Matco Clinic                 |  | Army Barracks Road, Malamre, Yola                                         | Yola North   | Adamawa |
| 183 | AD/0020 | AD/0020/S/7  | Matco Clinic                 |  | Army Barracks Road, Malamre, Yola                                         | Yola North   | Adamawa |
| 184 | AD/0020 | AD/0020/S/1  | Matco Clinic                 |  | Army Barracks Road, Malamre, Yola                                         | Yola North   | Adamawa |
| 185 | AD/0022 | AD/0022/S/7  | Mahmud Clinic                |  | Jimeta, Yola                                                              | Yola North   | Adamawa |
| 186 | AD/0022 | AD/0022/S/5  | Mahmud Clinic                |  | Jimeta, Yola                                                              | Yola North   | Adamawa |
| 187 | AD/0022 | AD/0022/S/1  | Mahmud Clinic                |  | Jimeta, Yola                                                              | Yola North   | Adamawa |
| 188 | AD/0022 | AD/0022/S/2  | Mahmud Clinic                |  | Jimeta, Yola                                                              | Yola North   | Adamawa |
| 189 | AD/0023 | AD/0023/S/2  | Dawau Clinic Ltd.            |  | Jimeta Yola                                                               | Yola North   | Adamawa |
| 190 | AD/0023 | AD/0023/S/1  | Dawau Clinic Ltd.            |  | Jimeta Yola                                                               | Yola North   | Adamawa |
| 191 | AD/0023 | AD/0023/S/5  | Dawau Clinic Ltd.            |  | Jimeta Yola                                                               | Yola North   | Adamawa |
| 192 | AD/0024 | AD/0024/S/3  | Peace Hospital               |  | No. 2 Luggere Street, Beside St. Theresa's Cathedral, Yola, Adamawa State | Yola North   | Adamawa |
| 193 | AD/0024 | AD/0024/S/13 | Peace Hospital               |  | No. 2 Luggere Street, Beside St. Theresa's Cathedral, Yola, Adamawa State | Yola North   | Adamawa |
| 194 | AD/0024 | AD/0024/S/4  | Peace Hospital               |  | No. 2 Luggere Street, Beside St. Theresa's Cathedral, Yola, Adamawa State | Yola North   | Adamawa |
| 195 | AD/0024 | AD/0024/S/2  | Peace Hospital               |  | No. 2 Luggere Street, Beside St. Theresa's Cathedral, Yola, Adamawa State | Yola North   | Adamawa |
| 196 | AD/0024 | AD/0024/S/7  | Peace Hospital               |  | No. 2 Luggere Street, Beside St. Theresa's Cathedral, Yola, Adamawa State | Yola North   | Adamawa |

|     |         |              |                            |                                              |                                                                           |            |         |
|-----|---------|--------------|----------------------------|----------------------------------------------|---------------------------------------------------------------------------|------------|---------|
| 197 | AD/0024 | AD/0024/S/10 | Peace Hospital             |                                              | No. 2 Luggere Street, Beside St. Theresa's Cathedral, Yola, Adamawa State | Yola North | Adamawa |
| 198 | AD/0024 | AD/0024/S/5  | Peace Hospital             |                                              | No. 2 Luggere Street, Beside St. Theresa's Cathedral, Yola, Adamawa State | Yola North | Adamawa |
| 199 | AD/0024 | AD/0024/S/1  | Peace Hospital             |                                              | No. 2 Luggere Street, Beside St. Theresa's Cathedral, Yola, Adamawa State | Yola North | Adamawa |
| 200 | AD/0025 | AD/0025/S/1  | Adamawa Hospital           |                                              | Abuja Road, Yola Town                                                     | Yola North | Adamawa |
| 201 | AD/0025 | AD/0025/S/2  | Adamawa Hospital           |                                              | Abuja Road, Yola Town                                                     | Yola North | Adamawa |
| 202 | AD/0025 | AD/0025/S/5  | Adamawa Hospital           |                                              | Abuja Road, Yola Town                                                     | Yola North | Adamawa |
| 203 | AD/0027 | AD/0027/S/4  | Sauki Medical Clinic       |                                              | Bauchi Street, Off Mustapha Moh'D Way, Jimeta, Yola                       | Yola North | Adamawa |
| 204 | AD/0027 | AD/0027/S/1  | Sauki Medical Clinic       |                                              | Bauchi Street, Off Mustapha Moh'D Way, Jimeta, Yola                       | Yola North | Adamawa |
| 205 | AD/0027 | AD/0027/S/5  | Sauki Medical Clinic       |                                              | Bauchi Street, Off Mustapha Moh'D Way, Jimeta, Yola                       | Yola North | Adamawa |
| 206 | AD/0027 | AD/0027/S/3  | Sauki Medical Clinic       |                                              | Bauchi Street, Off Mustapha Moh'D Way, Jimeta, Yola                       | Yola North | Adamawa |
| 207 | AD/0027 | AD/0027/S/7  | Sauki Medical Clinic       |                                              | Bauchi Street, Off Mustapha Moh'D Way, Jimeta, Yola                       | Yola North | Adamawa |
| 208 | AD/0027 | AD/0027/S/2  | Sauki Medical Clinic       |                                              | Bauchi Street, Off Mustapha Moh'D Way, Jimeta, Yola                       | Yola North | Adamawa |
| 209 | AD/0027 | AD/0027/S/6  | Sauki Medical Clinic       |                                              | Bauchi Street, Off Mustapha Moh'D Way, Jimeta, Yola                       | Yola North | Adamawa |
| 210 | AD/0028 | AD/0028/S/2  | The Freedom Polyclinic     |                                              | 9b Hospital Road, Jimeta                                                  | Yola North | Adamawa |
| 211 | AD/0028 | AD/0028/S/5  | The Freedom Polyclinic     |                                              | 9b Hospital Road, Jimeta                                                  | Yola North | Adamawa |
| 212 | AD/0029 | AD/0029/S/2  | Galbose Clinic & Maternity |                                              | 22 Atiki Abubakar Way, Jimeta, Yola                                       | Yola North | Adamawa |
| 213 | AD/0029 | AD/0029/S/5  | Galbose Clinic & Maternity |                                              | 22 Atiki Abubakar Way, Jimeta, Yola                                       | Yola North | Adamawa |
| 214 | AD/0029 | AD/0029/S/3  | Galbose Clinic & Maternity |                                              | 22 Atiki Abubakar Way, Jimeta, Yola                                       | Yola North | Adamawa |
| 215 | AD/0029 | AD/0029/S/4  | Galbose Clinic & Maternity |                                              | 22 Atiki Abubakar Way, Jimeta, Yola                                       | Yola North | Adamawa |
| 216 | AD/0029 | AD/0029/S/7  | Galbose Clinic & Maternity |                                              | 22 Atiki Abubakar Way, Jimeta, Yola                                       | Yola North | Adamawa |
| 217 | AD/0029 | AD/0029/S/6  | Galbose Clinic & Maternity |                                              | 22 Atiki Abubakar Way, Jimeta, Yola                                       | Yola North | Adamawa |
| 218 | AD/0029 | AD/0029/S/1  | Galbose Clinic & Maternity |                                              | 22 Atiki Abubakar Way, Jimeta, Yola                                       | Yola North | Adamawa |
| 219 | AD/0030 | AD/0030/S/2  | Jimeta Clinics & Maternity |                                              | Bishop Street, Jimeta, Yola                                               | Yola North | Adamawa |
| 220 | AD/0030 | AD/0030/S/1  | Jimeta Clinics & Maternity |                                              | Bishop Street, Jimeta, Yola                                               | Yola North | Adamawa |
| 221 | AD/0030 | AD/0030/S/3  | Jimeta Clinics & Maternity |                                              | Bishop Street, Jimeta, Yola                                               | Yola North | Adamawa |
| 222 | AD/0030 | AD/0030/S/5  | Jimeta Clinics & Maternity |                                              | Bishop Street, Jimeta, Yola                                               | Yola North | Adamawa |
| 223 | AD/0030 | AD/0030/S/7  | Jimeta Clinics & Maternity |                                              | Bishop Street, Jimeta, Yola                                               | Yola North | Adamawa |
| 224 | AD/0041 | AD/0041/S/5  | Springfield Hospital       | Gen. Med. Practice, Gen. Surgery, Laboratory | Airport Road, Jimeta                                                      | Yola North | Adamawa |
| 225 | AD/0041 | AD/0041/S    | Springfield Hospital       | Gen. Med. Practice, Gen. Surgery, Laboratory | Airport Road, Jimeta                                                      | Yola North | Adamawa |
| 226 | AD/0041 | AD/0041/S/2  | Springfield Hospital       | Gen. Med. Practice, Gen. Surgery, Laboratory | Airport Road, Jimeta                                                      | Yola North | Adamawa |
| 227 | AD/0051 | AD/0051/S/2  | Arhyel-Royal Hospital      |                                              | Numan Road, Jimeta                                                        | Yola South | Adamawa |
| 228 | AD/0051 | AD/0051/S/5  | Arhyel-Royal Hospital      |                                              | Numan Road, Jimeta                                                        | Yola South | Adamawa |
| 229 | AD/0052 | AD/0052/S/15 | General Hospital, Mubi     |                                              | Mubi                                                                      | Mubi South | Adamawa |
| 230 | AD/0052 | AD/0052/S/5  | General Hospital, Mubi     |                                              | Mubi                                                                      | Mubi South | Adamawa |
| 231 | AD/0052 | AD/0052/S/4  | General Hospital, Mubi     |                                              | Mubi                                                                      | Mubi South | Adamawa |
| 232 | AD/0052 | AD/0052/S/7  | General Hospital, Mubi     |                                              | Mubi                                                                      | Mubi South | Adamawa |
| 233 | AD/0052 | AD/0052/S/8  | General Hospital, Mubi     |                                              | Mubi                                                                      | Mubi South | Adamawa |

|     |         |              |                                              |                                                  |                                    |            |         |
|-----|---------|--------------|----------------------------------------------|--------------------------------------------------|------------------------------------|------------|---------|
| 234 | AD/0052 | AD/0052/S/2  | General Hospital, Mubi                       |                                                  | Mubi                               | Mubi South | Adamawa |
| 235 | AD/0052 | AD/0052/S/1  | General Hospital, Mubi                       |                                                  | Mubi                               | Mubi South | Adamawa |
| 236 | AD/0053 | AD/0053/S/4  | Newlife Hospital                             | Surgery, O&G, Laboratory, Radiology and Pharmacy | Sabon Layi, Mubi                   | Mubi North | Adamawa |
| 237 | AD/0053 | AD/0053/S/7  | Newlife Hospital                             | Surgery, O&G, Laboratory, Radiology and Pharmacy | Sabon Layi, Mubi                   | Mubi North | Adamawa |
| 238 | AD/0053 | AD/0053/S/1  | Newlife Hospital                             | Surgery, O&G, Laboratory, Radiology and Pharmacy | Sabon Layi, Mubi                   | Mubi North | Adamawa |
| 239 | AD/0053 | AD/0053/S/2  | Newlife Hospital                             | Surgery, O&G, Laboratory, Radiology and Pharmacy | Sabon Layi, Mubi                   | Mubi North | Adamawa |
| 240 | AD/0053 | AD/0053/S/3  | Newlife Hospital                             | Surgery, O&G, Laboratory, Radiology and Pharmacy | Sabon Layi, Mubi                   | Mubi North | Adamawa |
| 241 | AD/0053 | AD/0053/S/5  | Newlife Hospital                             | Surgery, O&G, Laboratory, Radiology and Pharmacy | Sabon Layi, Mubi                   | Mubi North | Adamawa |
| 242 | AD/0054 | AD/0054/S/2  | General Hospital, Garkida                    |                                                  | Garkida                            | Gombi      | Adamawa |
| 243 | AD/0054 | AD/0054/S/4  | General Hospital, Garkida                    |                                                  | Garkida                            | Gombi      | Adamawa |
| 244 | AD/0054 | AD/0054/S/7  | General Hospital, Garkida                    |                                                  | Garkida                            | Gombi      | Adamawa |
| 245 | AD/0054 | AD/0054/S/15 | General Hospital, Garkida                    |                                                  | Garkida                            | Gombi      | Adamawa |
| 246 | AD/0054 | AD/0054/S/1  | General Hospital, Garkida                    |                                                  | Garkida                            | Gombi      | Adamawa |
| 247 | AD/0054 | AD/0054/S/8  | General Hospital, Garkida                    |                                                  | Garkida                            | Gombi      | Adamawa |
| 248 | AD/0054 | AD/0054/S/5  | General Hospital, Garkida                    |                                                  | Garkida                            | Gombi      | Adamawa |
| 249 | AD/0055 | AD/0055/S/5  | Cottage Hospital, Hong                       |                                                  | Hong                               | Hong       | Adamawa |
| 250 | AD/0055 | AD/0055/S/1  | Cottage Hospital, Hong                       |                                                  | Hong                               | Hong       | Adamawa |
| 251 | AD/0055 | AD/0055/S/2  | Cottage Hospital, Hong                       |                                                  | Hong                               | Hong       | Adamawa |
| 252 | AD/0056 | AD/0056/S/1  | Cottage Hospital, Guyuk                      |                                                  | Guyuk                              | Guyuk      | Adamawa |
| 253 | AD/0056 | AD/0056/S/2  | Cottage Hospital, Guyuk                      |                                                  | Guyuk                              | Guyuk      | Adamawa |
| 254 | AD/0056 | AD/0056/S/5  | Cottage Hospital, Guyuk                      |                                                  | Guyuk                              | Guyuk      | Adamawa |
| 255 | AD/0077 | AD/0077/S/6  | General Hospital, Michika                    |                                                  | Michika, Adamawa State             | Michika    | Adamawa |
| 256 | AD/0077 | AD/0077/S/2  | General Hospital, Michika                    |                                                  | Michika, Adamawa State             | Michika    | Adamawa |
| 257 | AD/0077 | AD/0077/S/3  | General Hospital, Michika                    |                                                  | Michika, Adamawa State             | Michika    | Adamawa |
| 258 | AD/0077 | AD/0077/S/1  | General Hospital, Michika                    |                                                  | Michika, Adamawa State             | Michika    | Adamawa |
| 259 | AD/0077 | AD/0077/S/4  | General Hospital, Michika                    |                                                  | Michika, Adamawa State             | Michika    | Adamawa |
| 260 | AD/0077 | AD/0077/S/5  | General Hospital, Michika                    |                                                  | Michika, Adamawa State             | Michika    | Adamawa |
| 261 | AD/0077 | AD/0077/S/15 | General Hospital, Michika                    |                                                  | Michika, Adamawa State             | Michika    | Adamawa |
| 262 | AD/0077 | AD/0077/S/8  | General Hospital, Michika                    |                                                  | Michika, Adamawa State             | Michika    | Adamawa |
| 263 | AD/0077 | AD/0077/S/7  | General Hospital, Michika                    |                                                  | Michika, Adamawa State             | Michika    | Adamawa |
| 264 | AD/0078 | AD/0078/S/1  | Cottage Hospital, Fufore                     |                                                  | Fufore, Adamawa State              | Fufore     | Adamawa |
| 265 | AD/0078 | AD/0078/S/2  | Cottage Hospital, Fufore                     |                                                  | Fufore, Adamawa State              | Fufore     | Adamawa |
| 266 | AD/0078 | AD/0078/S/5  | Cottage Hospital, Fufore                     |                                                  | Fufore, Adamawa State              | Fufore     | Adamawa |
| 267 | AD/0083 | AD/0083/S/5  | Federal College of Education, College Clinic |                                                  | Jimeta, Yola Road, Adamawa State   | Yola North | Adamawa |
| 268 | AD/0084 | AD/0084/S/4  | Federal Polytechnic Clinic, Mubi             |                                                  | Barama Ward, Mubi                  | Mubi North | Adamawa |
| 269 | AD/0084 | AD/0084/S/5  | Federal Polytechnic Clinic, Mubi             |                                                  | Barama Ward, Mubi                  | Mubi North | Adamawa |
| 270 | AD/0104 | AD/0104/S/5  | OPTIMUM CLINIC                               |                                                  | 100 MOH*****D MUSTAPHA WAY, JIMETA | Yola North | Adamawa |
| 271 | AD/0116 | AD/0116/S/3  | Trust Medical Centre                         |                                                  | Anguwan Faransa, Gombi             | Gombi      | Adamawa |

|     |         |              |                                          |     |                                                          |             |           |
|-----|---------|--------------|------------------------------------------|-----|----------------------------------------------------------|-------------|-----------|
| 272 | AD/0116 | AD/0116/S/6  | Trust Medical Centre                     |     | Anguwan Faransa, Gombi                                   | Gombi       | Adamawa   |
| 273 | AD/0116 | AD/0116/S/7  | Trust Medical Centre                     |     | Anguwan Faransa, Gombi                                   | Gombi       | Adamawa   |
| 274 | AD/0116 | AD/0116/S/5  | Trust Medical Centre                     |     | Anguwan Faransa, Gombi                                   | Gombi       | Adamawa   |
| 275 | AD/0116 | AD/0116/S/1  | Trust Medical Centre                     |     | Anguwan Faransa, Gombi                                   | Gombi       | Adamawa   |
| 276 | AD/0116 | AD/0116/S/2  | Trust Medical Centre                     |     | Anguwan Faransa, Gombi                                   | Gombi       | Adamawa   |
| 277 | AD/0118 | AD/0118/S/7  | The New Boshang Clinic and maternity Ltd |     | Karewa GRA, Jimeta-Yola                                  | Yola North  | Adamawa   |
| 278 | AD/0118 | AD/0118/S/3  | The New Boshang Clinic and maternity Ltd |     | Karewa GRA, Jimeta-Yola                                  | Yola North  | Adamawa   |
| 279 | AD/0118 | AD/0118/S/1  | The New Boshang Clinic and maternity Ltd |     | Karewa GRA, Jimeta-Yola                                  | Yola North  | Adamawa   |
| 280 | AD/0118 | AD/0118/S/6  | The New Boshang Clinic and maternity Ltd |     | Karewa GRA, Jimeta-Yola                                  | Yola North  | Adamawa   |
| 281 | AD/0121 | AD/0121/S/5  | Valli Medical Clinic                     |     | 22 Mallamre, Opp FCE First Gate, Along Aliyu Way, Jimeta | Yola North  | Adamawa   |
| 282 | AD/0121 | AD/0121/S/2  | Valli Medical Clinic                     |     | 22 Mallamre, Opp FCE First Gate, Along Aliyu Way, Jimeta | Yola North  | Adamawa   |
| 283 | AD/0121 | AD/0121/S/3  | Valli Medical Clinic                     |     | 22 Mallamre, Opp FCE First Gate, Along Aliyu Way, Jimeta | Yola North  | Adamawa   |
| 284 | AD/0121 | AD/0121/S/1  | Valli Medical Clinic                     |     | 22 Mallamre, Opp FCE First Gate, Along Aliyu Way, Jimeta | Yola North  | Adamawa   |
| 285 | AD/0121 | AD/0121/S/6  | Valli Medical Clinic                     |     | 22 Mallamre, Opp FCE First Gate, Along Aliyu Way, Jimeta | Yola North  | Adamawa   |
| 286 | AD/0125 | AD/0125/S/6  | Da'ama Specialist Hospital               |     | # 70/72 Atiku Abubakar Road, Yola                        | Yola North  | Adamawa   |
| 287 | AD/0125 | AD/0125/S/5  | Da'ama Specialist Hospital               |     | # 70/72 Atiku Abubakar Road, Yola                        | Yola North  | Adamawa   |
| 288 | AD/0125 | AD/0125/S/2  | Da'ama Specialist Hospital               |     | # 70/72 Atiku Abubakar Road, Yola                        | Yola North  | Adamawa   |
| 289 | AD/0125 | AD/0125/S/1  | Da'ama Specialist Hospital               |     | # 70/72 Atiku Abubakar Road, Yola                        | Yola North  | Adamawa   |
| 290 | AD/0126 | AD/0126/S/5  | American University Of Nigeria Clinic.   |     | Lamido Zubairu Way, Yola By-Pass, Adamawa State.         | Yola North  | Adamawa   |
| 291 | AD/0132 | AD/0132/S/4  | Valada Hospital & Maternity              |     | Army Barracks Road Yola Adamawa State                    | Yola North  | Adamawa   |
| 292 | AD/0132 | AD/0132/S/5  | Valada Hospital & Maternity              |     | Army Barracks Road Yola Adamawa State                    | Yola North  | Adamawa   |
| 293 | AK/0001 | AK/0001/S/4  | Samaritan Clinic                         |     | No. 7 Ekong Uko Street, Eket                             | Eket        | Akwa Ibom |
| 294 | AK/0001 | AK/0001/S/5  | Samaritan Clinic                         |     | No. 7 Ekong Uko Street, Eket                             | Eket        | Akwa Ibom |
| 295 | AK/0001 | AK/0001/S/7  | Samaritan Clinic                         |     | No. 7 Ekong Uko Street, Eket                             | Eket        | Akwa Ibom |
| 296 | AK/0002 | AK/0002/S/3  | Immanuel General Hospital                | -   | Eket, Akwa Ibom                                          | Eket        | Akwa Ibom |
| 297 | AK/0002 | AK/0002/S/13 | Immanuel General Hospital                | -   | Eket, Akwa Ibom                                          | Eket        | Akwa Ibom |
| 298 | AK/0002 | AK/0002/S/4  | Immanuel General Hospital                | -   | Eket, Akwa Ibom                                          | Eket        | Akwa Ibom |
| 299 | AK/0002 | AK/0002/S/14 | Immanuel General Hospital                | -   | Eket, Akwa Ibom                                          | Eket        | Akwa Ibom |
| 300 | AK/0002 | AK/0002/S/5  | Immanuel General Hospital                | -   | Eket, Akwa Ibom                                          | Eket        | Akwa Ibom |
| 301 | AK/0007 | AK/0007/S/5  | General Hospital, Ikot Ekpene            |     | Ikot Ekpene, Akwa Ibom                                   | Ikot Ekpene | Akwa Ibom |
| 302 | AK/0007 | AK/0007/S/2  | General Hospital, Ikot Ekpene            |     | Ikot Ekpene, Akwa Ibom                                   | Ikot Ekpene | Akwa Ibom |
| 303 | AK/0007 | AK/0007/S/4  | General Hospital, Ikot Ekpene            |     | Ikot Ekpene, Akwa Ibom                                   | Ikot Ekpene | Akwa Ibom |
| 304 | AK/0007 | AK/0007/S/7  | General Hospital, Ikot Ekpene            |     | Ikot Ekpene, Akwa Ibom                                   | Ikot Ekpene | Akwa Ibom |
| 305 | AK/0007 | AK/0007/S/8  | General Hospital, Ikot Ekpene            |     | Ikot Ekpene, Akwa Ibom                                   | Ikot Ekpene | Akwa Ibom |
| 306 | AK/0009 | AK/0009/S/12 | Dominion Specialist Hospital             | ENT | 4, Ibong Road, Ikot Ekpene                               | Ikot Ekpene | Akwa Ibom |
| 307 | AK/0010 | AK/0010/S/4  | General Hospital, Iquita-Oron            |     | Iquita-Oron                                              | Oron        | Akwa Ibom |
| 308 | AK/0010 | AK/0010/S/7  | General Hospital, Iquita-Oron            |     | Iquita-Oron                                              | Oron        | Akwa Ibom |
| 309 | AK/0012 | AK/0012/S/7  | University Of Uyo Teaching Hospital, Uyo |     | Uyo, Akwa Ibom                                           | Uyo         | Akwa Ibom |
| 310 | AK/0012 | AK/0012/S/10 | University Of Uyo Teaching Hospital, Uyo |     | Uyo, Akwa Ibom                                           | Uyo         | Akwa Ibom |



|     |         |              |                                          |               |                                                               |             |           |
|-----|---------|--------------|------------------------------------------|---------------|---------------------------------------------------------------|-------------|-----------|
| 311 | AK/0012 | AK/0012/S/6  | University Of Uyo Teaching Hospital, Uyo |               | Uyo, Akwa Ibom                                                | Uyo         | Akwa Ibom |
| 312 | AK/0012 | AK/0012/S/3  | University Of Uyo Teaching Hospital, Uyo |               | Uyo, Akwa Ibom                                                | Uyo         | Akwa Ibom |
| 313 | AK/0012 | AK/0012/S/4  | University Of Uyo Teaching Hospital, Uyo |               | Uyo, Akwa Ibom                                                | Uyo         | Akwa Ibom |
| 314 | AK/0012 | AK/0012/S/1  | University Of Uyo Teaching Hospital, Uyo |               | Uyo, Akwa Ibom                                                | Uyo         | Akwa Ibom |
| 315 | AK/0012 | AK/0012/S/2  | University Of Uyo Teaching Hospital, Uyo |               | Uyo, Akwa Ibom                                                | Uyo         | Akwa Ibom |
| 316 | AK/0012 | AK/0012/S/5  | University Of Uyo Teaching Hospital, Uyo |               | Uyo, Akwa Ibom                                                | Uyo         | Akwa Ibom |
| 317 | AK/0013 | AK/0013/S/13 | Mfon Abasi Medical Centre                |               | Uyo, Akwa Ibom                                                | Uyo         | Akwa Ibom |
| 318 | AK/0013 | AK/0013/S/3  | Mfon Abasi Medical Centre                |               | Uyo, Akwa Ibom                                                | Uyo         | Akwa Ibom |
| 319 | AK/0013 | AK/0013/S/2  | Mfon Abasi Medical Centre                |               | Uyo, Akwa Ibom                                                | Uyo         | Akwa Ibom |
| 320 | AK/0013 | AK/0013/S/1  | Mfon Abasi Medical Centre                |               | Uyo, Akwa Ibom                                                | Uyo         | Akwa Ibom |
| 321 | AK/0017 | AK/0017/S/1  | Uwakmfon Specialist Clinics & Hospital   |               | 27 Nwaniba Road, Uyo, Akwa Ibom State                         | Uyo         | Akwa Ibom |
| 322 | AK/0017 | AK/0017/S/2  | Uwakmfon Specialist Clinics & Hospital   |               | 27 Nwaniba Road, Uyo, Akwa Ibom State                         | Uyo         | Akwa Ibom |
| 323 | AK/0017 | AK/0017/S/5  | Uwakmfon Specialist Clinics & Hospital   |               | 27 Nwaniba Road, Uyo, Akwa Ibom State                         | Uyo         | Akwa Ibom |
| 324 | AK/0018 | AK/0018/S/4  | Beemas Pharmacy                          | Pharmacy      | 75 Aka Road                                                   | Uyo         | Akwa Ibom |
| 325 | AK/0019 | AK/0019/S/15 | Ceejay Vision Centre                     | Ophthalmology | Uyo                                                           | Uyo         | Akwa Ibom |
| 326 | AK/0021 | AK/0021/S/4  | Base Pharmacy                            | Pharmacy      | 44, Abak Road, Uyo                                            | Uyo         | Akwa Ibom |
| 327 | AK/0023 | AK/0023/S/4  | One Stop Pharmacy                        | Pharmacy      | 17, Nwaniba Street, Uyo                                       | Uyo         | Akwa Ibom |
| 328 | AK/0027 | AK/0027/S/4  | Frank-Chimex Pharmacy                    | Pharmacy      | 44, Aka road, Uyo                                             | Uyo         | Akwa Ibom |
| 329 | AK/0028 | AK/0028/S/5  | Central Laboratory                       | Laboratory    | Uyo                                                           | Uyo         | Akwa Ibom |
| 330 | AK/0034 | AK/0034/S/3  | Mainland Clinic/Hospital                 |               | 2 Andy-Umana Lane, Off Aka Road, Uyo, Akwa Ibom               | Uyo         | Akwa Ibom |
| 331 | AK/0035 | AK/0035/S/15 | Majesty Hospital & Eye Clinics           |               | 47 Wellington Bassey Akwa Ibom                                | Uyo         | Akwa Ibom |
| 332 | AK/0035 | AK/0035/S/5  | Majesty Hospital & Eye Clinics           |               | 47 Wellington Bassey Akwa Ibom                                | Uyo         | Akwa Ibom |
| 333 | AK/0037 | AK/0037/S/1  | Mount Olive Clinic & Maternity           |               | 8 Ebonny Essien Street, off Ikot Ekpene Rd, Uyo, A/Ibom State | Uyo         | Akwa Ibom |
| 334 | AK/0037 | AK/0037/S/3  | Mount Olive Clinic & Maternity           |               | 8 Ebonny Essien Street, off Ikot Ekpene Rd, Uyo, A/Ibom State | Uyo         | Akwa Ibom |
| 335 | AK/0040 | AK/0040/S/5  | Royal Pathology                          | Laboratory    | 3 Essien Nton Road, Ikot Ekpene                               | Ikot Ekpene | Akwa Ibom |
| 336 | AK/0045 | AK/0045/S/5  | University of Uyo Health Centre, Uyo     |               | Uyo, A/Ibom State                                             | Uyo         | Akwa Ibom |
| 337 | AK/0045 | AK/0045/S/1  | University of Uyo Health Centre, Uyo     |               | Uyo, A/Ibom State                                             | Uyo         | Akwa Ibom |
| 338 | AK/0045 | AK/0045/S/4  | University of Uyo Health Centre, Uyo     |               | Uyo, A/Ibom State                                             | Uyo         | Akwa Ibom |
| 339 | AK/0046 | AK/0046/S/1  | All Saints Medical Centre                |               | 1-5 Independent Avenue, Abak, Akwa Ibom                       | Abak        | Akwa Ibom |
| 340 | AK/0048 | AK/0048/S/6  | Dammy memorial hospital                  |               | 34, ukana offot street, uyo, Akwa-ibom                        | Uyo         | Akwa Ibom |
| 341 | AK/0048 | AK/0048/S/2  | Dammy memorial hospital                  |               | 34, ukana offot street, uyo, Akwa-ibom                        | Uyo         | Akwa Ibom |
| 342 | AK/0048 | AK/0048/S/1  | Dammy memorial hospital                  |               | 34, ukana offot street, uyo, Akwa-ibom                        | Uyo         | Akwa Ibom |
| 343 | AK/0048 | AK/0048/S/3  | Dammy memorial hospital                  |               | 34, ukana offot street, uyo, Akwa-ibom                        | Uyo         | Akwa Ibom |
| 344 | AK/0049 | AK/0049/S/1  | Dan Abia specialist clinic               |               | 11b, Idoro road, off itam junction, uyo, Akwa-ibom            | Uyo         | Akwa Ibom |
| 345 | AK/0055 | AK/0055/S/3  | Iha foundation medical center            |               | Eket Annex, Ekpeyu street, Ikot ebok Eket                     | Eket        | Akwa Ibom |
| 346 | AK/0056 | AK/0056/S/3  | Kaizo specialist hospital                |               | 10, market road, Afaha offot, off Abak road, Uyo              | Uyo         | Akwa Ibom |
| 347 | AK/0056 | AK/0056/S/2  | Kaizo specialist hospital                |               | 10, market road, Afaha offot, off Abak road, Uyo              | Uyo         | Akwa Ibom |
| 348 | AK/0056 | AK/0056/S/1  | Kaizo specialist hospital                |               | 10, market road, Afaha offot, off Abak road, Uyo              | Uyo         | Akwa Ibom |
| 349 | AK/0058 | AK/0058/S/15 | Mercy hospital                           |               | 95 hospital road, Abak, Ak/Ibom                               | Abak        | Akwa Ibom |
| 350 | AK/0058 | AK/0058/S/3  | Mercy hospital                           |               | 95 hospital road, Abak, Ak/Ibom                               | Abak        | Akwa Ibom |

|     |         |              |                                            |                                             |                                                                  |                   |           |
|-----|---------|--------------|--------------------------------------------|---------------------------------------------|------------------------------------------------------------------|-------------------|-----------|
| 351 | AK/0058 | AK/0058/S/7  | Mercy hospital                             |                                             | 95 hospital road, Abak, Ak/Ibom                                  | Abak              | Akwa Ibom |
| 352 | AK/0058 | AK/0058/S/1  | Mercy hospital                             |                                             | 95 hospital road, Abak, Ak/Ibom                                  | Abak              | Akwa Ibom |
| 353 | AK/0058 | AK/0058/S/5  | Mercy hospital                             |                                             | 95 hospital road, Abak, Ak/Ibom                                  | Abak              | Akwa Ibom |
| 354 | AK/0058 | AK/0058/S/4  | Mercy hospital                             |                                             | 95 hospital road, Abak, Ak/Ibom                                  | Abak              | Akwa Ibom |
| 355 | AK/0059 | AK/0059/S/3  | St. Athanasius hospital                    |                                             | 1, ufeh street,F.H.estate , Abak road, Uyo                       | Uyo               | Akwa Ibom |
| 356 | AK/0059 | AK/0059/S/6  | St. Athanasius hospital                    |                                             | 1, ufeh street,F.H.estate , Abak road, Uyo                       | Uyo               | Akwa Ibom |
| 357 | AK/0059 | AK/0059/S/2  | St. Athanasius hospital                    |                                             | 1, ufeh street,F.H.estate , Abak road, Uyo                       | Uyo               | Akwa Ibom |
| 358 | AK/0059 | AK/0059/S/1  | St. Athanasius hospital                    |                                             | 1, ufeh street,F.H.estate , Abak road, Uyo                       | Uyo               | Akwa Ibom |
| 359 | AK/0060 | AK/0060/S/1  | Ubong Abasi specialist clinic              |                                             | 5, clement Isong street, FHA estate, Abak road, Uyo              | Uyo               | Akwa Ibom |
| 360 | AK/0060 | AK/0060/S/3  | Ubong Abasi specialist clinic              |                                             | 5, clement Isong street, FHA estate, Abak road, Uyo              | Uyo               | Akwa Ibom |
| 361 | AK/0062 | AK/0062/S/3  | Uwem foundation clinic                     |                                             | 8b Etienam street, oron, AK/IBOM                                 | Oron              | Akwa Ibom |
| 362 | AK/0066 | AK/0066/S/1  | DOMINGO HOSPITAL                           | SURGERY                                     | Plot 9, unit E, Ben Udo Street, Ewet Housing estate, uyo         | Urue Offong Oruko | Akwa Ibom |
| 363 | AK/0069 | AK/0069/S/5  | JIL LABORATORY                             | Laboratory                                  | 145, ORON ROAD, AK/IBOM                                          | Uyo               | Akwa Ibom |
| 364 | AK/0071 | AK/0071/S/4  | M&I PHARMACY                               | Pharmacy                                    | 139G UNIT A,ISEMIN AVENUE,EWET HOUSING ESTATE,UYO                | Uyo               | Akwa Ibom |
| 365 | AK/0073 | AK/0073/S/3  | MFON ABASI MEDICAL CENTER                  | Internal medicine, Optometry ,O&G, Surgery, | 10 GIBBS STREET, UYO                                             | Uyo               | Akwa Ibom |
| 366 | AK/0073 | AK/0073/S/1  | MFON ABASI MEDICAL CENTER                  | Internal medicine, Optometry ,O&G, Surgery, | 10 GIBBS STREET, UYO                                             | Uyo               | Akwa Ibom |
| 367 | AK/0073 | AK/0073/S/2  | MFON ABASI MEDICAL CENTER                  | Internal medicine, Optometry ,O&G, Surgery, | 10 GIBBS STREET, UYO                                             | Uyo               | Akwa Ibom |
| 368 | AK/0073 | AK/0073/S/13 | MFON ABASI MEDICAL CENTER                  | Internal medicine, Optometry ,O&G, Surgery, | 10 GIBBS STREET, UYO                                             | Uyo               | Akwa Ibom |
| 369 | AK/0076 | AK/0076/S/5  | ULTIMATE MEDICAL DIAGNOSTICS               | Laboratory, Radiology                       | 15, IBB AVENUE, UYO                                              | Uyo               | Akwa Ibom |
| 370 | AK/0076 | AK/0076/S/7  | ULTIMATE MEDICAL DIAGNOSTICS               | Laboratory, Radiology                       | 15, IBB AVENUE, UYO                                              | Uyo               | Akwa Ibom |
| 371 | AK/0078 | AK/0078/S/5  | UNIC DIAGNOSTIC LABORATORY                 | Laboratory                                  | 10 GIBBS STREET, UYO                                             | Uyo               | Akwa Ibom |
| 372 | AK/0080 | AK/0080/S/13 | Canon Eye Clinic & Optometric Services Ltd | Optometry                                   | 89 Aka Road                                                      | Uyo               | Akwa Ibom |
| 373 | AK/0082 | AK/0082/S/3  | Our Lady of Lourdes Infirmary              | O&G                                         | 22 Ekpanya Street Uyo                                            | Uyo               | Akwa Ibom |
| 374 | AK/0082 | AK/0082/S/1  | Our Lady of Lourdes Infirmary              | O&G                                         | 22 Ekpanya Street Uyo                                            | Uyo               | Akwa Ibom |
| 375 | AK/0084 | AK/0084/S/1  | Etuknwa Specialist Clinic                  |                                             | 120,Udo-Umana Street, Uyo Akwa Ibom State                        | Uyo               | Akwa Ibom |
| 376 | AK/0085 | AK/0085/S/14 | Dunamis Clinic And Maternity               |                                             | 25 A,Afia Etid Street, Off Udo Umana Street, Uyo Akwa Ibom State | Uyo               | Akwa Ibom |
| 377 | AK/0087 | AK/0087/S/3  | Jeconiah Specialist Hospital               |                                             | Off 308,Oron Road, Uyo Akwa Ibom State                           | Uyo               | Akwa Ibom |
| 378 | AK/0087 | AK/0087/S/6  | Jeconiah Specialist Hospital               |                                             | Off 308,Oron Road, Uyo Akwa Ibom State                           | Uyo               | Akwa Ibom |
| 379 | AK/0087 | AK/0087/S/1  | Jeconiah Specialist Hospital               |                                             | Off 308,Oron Road, Uyo Akwa Ibom State                           | Uyo               | Akwa Ibom |
| 380 | AK/0090 | AK/0090/S/6  | Petalice Medical Centre LTD                |                                             | No 5/7 Marickson Hospital Way Akwa Ibom State                    | Uyo               | Akwa Ibom |
| 381 | AK/0090 | AK/0090/S/3  | Petalice Medical Centre LTD                |                                             | No 5/7 Marickson Hospital Way Akwa Ibom State                    | Uyo               | Akwa Ibom |
| 382 | AK/0090 | AK/0090/S/2  | Petalice Medical Centre LTD                |                                             | No 5/7 Marickson Hospital Way Akwa Ibom State                    | Uyo               | Akwa Ibom |
| 383 | AK/0090 | AK/0090/S/1  | Petalice Medical Centre LTD                |                                             | No 5/7 Marickson Hospital Way Akwa Ibom State                    | Uyo               | Akwa Ibom |
| 384 | AK/0092 | AK/0092/S/3  | Premier Medical Services                   |                                             | 3,High Tension Line,Edet Akpan Avenue, Uyo Akwa Ibom State       | Uyo               | Akwa Ibom |
| 385 | AK/0092 | AK/0092/S/7  | Premier Medical Services                   |                                             | 3,High Tension Line,Edet Akpan Avenue, Uyo Akwa Ibom State       | Uyo               | Akwa Ibom |

|     |         |              |                                             |  |                                                                   |             |           |
|-----|---------|--------------|---------------------------------------------|--|-------------------------------------------------------------------|-------------|-----------|
| 386 | AK/0092 | AK/0092/S/6  | Premier Medical Services                    |  | 3,High Tension Line,Edet Akpan Avenue, Uyo Akwa Ibom State        | Uyo         | Akwa Ibom |
| 387 | AK/0093 | AK/0093/S/6  | Queen Esther Specialist Hospital            |  | Ediye Samuel Street,Itiam Etoi, Uyo Akwa Ibom State               | Uyo         | Akwa Ibom |
| 388 | AK/0095 | AK/0095/S/3  | St. Lukes Hospital                          |  | Anua P.M.B. 3, Uyo, Akwa Ibom State                               | Uyo         | Akwa Ibom |
| 389 | AK/0095 | AK/0095/S/7  | St. Lukes Hospital                          |  | Anua P.M.B. 3, Uyo, Akwa Ibom State                               | Uyo         | Akwa Ibom |
| 390 | AK/0095 | AK/0095/S/11 | St. Lukes Hospital                          |  | Anua P.M.B. 3, Uyo, Akwa Ibom State                               | Uyo         | Akwa Ibom |
| 391 | AK/0095 | AK/0095/S/2  | St. Lukes Hospital                          |  | Anua P.M.B. 3, Uyo, Akwa Ibom State                               | Uyo         | Akwa Ibom |
| 392 | AK/0095 | AK/0095/S/1  | St. Lukes Hospital                          |  | Anua P.M.B. 3, Uyo, Akwa Ibom State                               | Uyo         | Akwa Ibom |
| 393 | AK/0095 | AK/0095/S/4  | St. Lukes Hospital                          |  | Anua P.M.B. 3, Uyo, Akwa Ibom State                               | Uyo         | Akwa Ibom |
| 394 | AK/0095 | AK/0095/S/5  | St. Lukes Hospital                          |  | Anua P.M.B. 3, Uyo, Akwa Ibom State                               | Uyo         | Akwa Ibom |
| 395 | AK/0095 | AK/0095/S/6  | St. Lukes Hospital                          |  | Anua P.M.B. 3, Uyo, Akwa Ibom State                               | Uyo         | Akwa Ibom |
| 396 | AK/0095 | AK/0095/S/8  | St. Lukes Hospital                          |  | Anua P.M.B. 3, Uyo, Akwa Ibom State                               | Uyo         | Akwa Ibom |
| 397 | AK/0097 | AK/0097/S/1  | Staphender Specialist klinik                |  | 3,Ibokette Street Off Aka Road, Uyo Akwa Ibom State               | Uyo         | Akwa Ibom |
| 398 | AK/0099 | AK/0099/S/3  | Nissi Specialist Hospital                   |  | Plot 42,Line H, Ewet Housing Estate, Uyo Akwa Ibom State          | Uyo         | Akwa Ibom |
| 399 | AK/0102 | AK/0102/S/14 | Full Care Ultrasound Diagnostic Center      |  | Full Care Ultrasound Diagnostic Center                            | Uyo         | Akwa Ibom |
| 400 | AK/0105 | AK/0105/S/5  | Dyme Hospital & Maternity Ltd               |  | 10,Edem Urua Street, Uyo, Akwa-Ibom State                         | Uyo         | Akwa Ibom |
| 401 | AK/0105 | AK/0105/S/3  | Dyme Hospital & Maternity Ltd               |  | 10,Edem Urua Street, Uyo, Akwa-Ibom State                         | Uyo         | Akwa Ibom |
| 402 | AK/0107 | AK/0107/S/14 | Coray Specialist Clinic & Maternity         |  | 8, Ibiam street, Uyo. Akwa Ibom state                             | Uyo         | Akwa Ibom |
| 403 | AK/0107 | AK/0107/S/3  | Coray Specialist Clinic & Maternity         |  | 8, Ibiam street, Uyo. Akwa Ibom state                             | Uyo         | Akwa Ibom |
| 404 | AK/0108 | AK/0108/S/8  | Winners Dental                              |  | 56, Nepa line, Uyo. Akwa Ibom State.                              | Uyo         | Akwa Ibom |
| 405 | AK/0111 | AK/0111/S/14 | Zoe Consultants Hospital                    |  | 33, Enwe street, Uyo. Akwa Ibom state.                            | Uyo         | Akwa Ibom |
| 406 | AK/0111 | AK/0111/S/1  | Zoe Consultants Hospital                    |  | 33, Enwe street, Uyo. Akwa Ibom state.                            | Uyo         | Akwa Ibom |
| 407 | AK/0111 | AK/0111/S/3  | Zoe Consultants Hospital                    |  | 33, Enwe street, Uyo. Akwa Ibom state.                            | Uyo         | Akwa Ibom |
| 408 | AK/0111 | AK/0111/S/2  | Zoe Consultants Hospital                    |  | 33, Enwe street, Uyo. Akwa Ibom state.                            | Uyo         | Akwa Ibom |
| 409 | AK/0112 | AK/0112/S/13 | Nathel Optical Services.                    |  | 65, Iboko Street, Uyo. Akwa Ibom State.                           | Uyo         | Akwa Ibom |
| 410 | AK/0113 | AK/0113/S/8  | Ark Dental and Maxillofacial Clinic Ltd     |  | 32, Ikot Ebido Street, opp. Winners Chapel, Uyo, Akwa Ibom state. | Uyo         | Akwa Ibom |
| 411 | AK/0115 | AK/0115/S/2  | San Dominique Hospital                      |  | Plot 1, Unit M, Ewet Housing Estate,Uyo. Akwa Ibom state.         | Uyo         | Akwa Ibom |
| 412 | AK/0115 | AK/0115/S/3  | San Dominique Hospital                      |  | Plot 1, Unit M, Ewet Housing Estate,Uyo. Akwa Ibom state.         | Uyo         | Akwa Ibom |
| 413 | AK/0115 | AK/0115/S/5  | San Dominique Hospital                      |  | Plot 1, Unit M, Ewet Housing Estate,Uyo. Akwa Ibom state.         | Uyo         | Akwa Ibom |
| 414 | AK/0115 | AK/0115/S/11 | San Dominique Hospital                      |  | Plot 1, Unit M, Ewet Housing Estate,Uyo. Akwa Ibom state.         | Uyo         | Akwa Ibom |
| 415 | AK/0115 | AK/0115/S/15 | San Dominique Hospital                      |  | Plot 1, Unit M, Ewet Housing Estate,Uyo. Akwa Ibom state.         | Uyo         | Akwa Ibom |
| 416 | AK/0116 | AK/0116/S/3  | Good Health Specialist Clinics Ltd          |  | 26, Udobio Street, Uyo, Akwa Ibom State.                          | Uyo         | Akwa Ibom |
| 417 | AN/0003 | AN/0003/S/1  | Harmony Hospital                            |  | No. 5 Oraogbu Street, Awka, Anambra State.                        | Awka South  | Anambra   |
| 418 | AN/0004 | AN/0004/S/1  | Beacon Hospital                             |  | 12. Umudora Street, Awka, Anambra State.                          | Awka South  | Anambra   |
| 419 | AN/0004 | AN/0004/S/3  | Beacon Hospital                             |  | 12. Umudora Street, Awka, Anambra State.                          | Awka South  | Anambra   |
| 420 | AN/0004 | AN/0004/S/2  | Beacon Hospital                             |  | 12. Umudora Street, Awka, Anambra State.                          | Awka South  | Anambra   |
| 421 | AN/0008 | AN/0008/S/1  | Nnamdi Azikiwe University Teaching Hospital |  | Nnewi, Anambra State                                              | Nnewi North | Anambra   |
| 422 | AN/0008 | AN/0008/S/2  | Nnamdi Azikiwe University Teaching Hospital |  | Nnewi, Anambra State                                              | Nnewi North | Anambra   |
| 423 | AN/0008 | AN/0008/S/4  | Nnamdi Azikiwe University Teaching Hospital |  | Nnewi, Anambra State                                              | Nnewi North | Anambra   |

|     |         |              |                                                       |               |                                                              |                |         |
|-----|---------|--------------|-------------------------------------------------------|---------------|--------------------------------------------------------------|----------------|---------|
| 424 | AN/0008 | AN/0008/S/6  | Nnamdi Azikiwe University Teaching Hospital           |               | Nnewi, Anambra State                                         | Nnewi North    | Anambra |
| 425 | AN/0008 | AN/0008/S/11 | Nnamdi Azikiwe University Teaching Hospital           |               | Nnewi, Anambra State                                         | Nnewi North    | Anambra |
| 426 | AN/0008 | AN/0008/S/15 | Nnamdi Azikiwe University Teaching Hospital           |               | Nnewi, Anambra State                                         | Nnewi North    | Anambra |
| 427 | AN/0008 | AN/0008/S/14 | Nnamdi Azikiwe University Teaching Hospital           |               | Nnewi, Anambra State                                         | Nnewi North    | Anambra |
| 428 | AN/0008 | AN/0008/S/12 | Nnamdi Azikiwe University Teaching Hospital           |               | Nnewi, Anambra State                                         | Nnewi North    | Anambra |
| 429 | AN/0008 | AN/0008/S/7  | Nnamdi Azikiwe University Teaching Hospital           |               | Nnewi, Anambra State                                         | Nnewi North    | Anambra |
| 430 | AN/0008 | AN/0008/S/5  | Nnamdi Azikiwe University Teaching Hospital           |               | Nnewi, Anambra State                                         | Nnewi North    | Anambra |
| 431 | AN/0008 | AN/0008/S/3  | Nnamdi Azikiwe University Teaching Hospital           |               | Nnewi, Anambra State                                         | Nnewi North    | Anambra |
| 432 | AN/0012 | AN/0012/S/4  | General Hospital Onitsha                              |               | Hospital Road, Onitsha, Anambra State.                       | Onitsha-North  | Anambra |
| 433 | AN/0012 | AN/0012/S/15 | General Hospital Onitsha                              |               | Hospital Road, Onitsha, Anambra State.                       | Onitsha-North  | Anambra |
| 434 | AN/0012 | AN/0012/S/6  | General Hospital Onitsha                              |               | Hospital Road, Onitsha, Anambra State.                       | Onitsha-North  | Anambra |
| 435 | AN/0012 | AN/0012/S/5  | General Hospital Onitsha                              |               | Hospital Road, Onitsha, Anambra State.                       | Onitsha-North  | Anambra |
| 436 | AN/0012 | AN/0012/S/3  | General Hospital Onitsha                              |               | Hospital Road, Onitsha, Anambra State.                       | Onitsha-North  | Anambra |
| 437 | AN/0012 | AN/0012/S/1  | General Hospital Onitsha                              |               | Hospital Road, Onitsha, Anambra State.                       | Onitsha-North  | Anambra |
| 438 | AN/0015 | AN/0015/S/1  | Menax Hospital                                        |               | Onowu Anatogu, St. Woliwo Layout Onitsha,                    | Onitsha-North  | Anambra |
| 439 | AN/0015 | AN/0015/S/3  | Menax Hospital                                        |               | Onowu Anatogu, St. Woliwo Layout Onitsha,                    | Onitsha-North  | Anambra |
| 440 | AN/0016 | AN/0016/S/14 | Rush Green Maternity Hosp. & Clinic                   |               | 64, Ugwunobamkpa Road, Near Isokwe Police Post, Onitsha.     | Onitsha-North  | Anambra |
| 441 | AN/0017 | AN/0017/S/5  | New Hope Medical Centre                               |               | 80, Modebe Avenue, Odoakpu, Onitsha, Anambra State.          | Onitsha-North  | Anambra |
| 442 | AN/0017 | AN/0017/S/7  | New Hope Medical Centre                               |               | 80, Modebe Avenue, Odoakpu, Onitsha, Anambra State.          | Onitsha-North  | Anambra |
| 443 | AN/0018 | AN/0018/S/3  | Venik Specialist Hospital                             |               | No. 1 Olo Street, Omagba Layout Onitsha, Anambra State.      | Onitsha-North  | Anambra |
| 444 | AN/0018 | AN/0018/S/14 | Venik Specialist Hospital                             |               | No. 1 Olo Street, Omagba Layout Onitsha, Anambra State.      | Onitsha-North  | Anambra |
| 445 | AN/0027 | AN/0027/S/3  | Mezie Hospital & Maternity                            |               | 103b Upper New Market, Onitsha, Anambra                      | Onitsha -South | Anambra |
| 446 | AN/0029 | AN/0029/S/1  | Ace Specialist Hospital                               |               | 73b Limca Road/1umuoji Street Onitsha, Anambra State.        | Onitsha -South | Anambra |
| 447 | AN/0041 | AN/0041/S/15 | Nosco Eye Hospital                                    | Ophthalmology | 152 Niger Bridge, Approach, Onitsha, Anambra State           | Onitsha-North  | Anambra |
| 448 | AN/0042 | AN/0042/S/6  | Prime Concept Consultants Children's Specialist Hosp. | Paediatrics   | 36, Obosi Road, Nkpor, Anambra State.                        | Idemili North  | Anambra |
| 449 | AN/0043 | AN/0043/S/4  | Junno Pharm. Ltd.                                     | Pharmacy      | Nnobi Road Otolo-Nnewi Anambra State.                        | Nnewi North    | Anambra |
| 450 | AN/0044 | AN/0044/S/4  | Rams Gate Pharm                                       | Pharmacy      | 117P/Harcourt Rd, Fegge, Onitsha, Anambra State.             | Onitsha-North  | Anambra |
| 451 | AN/0045 | AN/0045/S/4  | Paxs Pharm. Ltd.                                      | Pharmacy      | No. 80 Awka Road, Onitsha, Anambra State                     | Onitsha-North  | Anambra |
| 452 | AN/0046 | AN/0046/S/4  | Canif Pharm. Ltd.                                     | Pharmacy      | 100 Awka Road, Onitsha, Anambra State.                       | Onitsha-North  | Anambra |
| 453 | AN/0047 | AN/0047/S/4  | Pitasen Pharmacy Ltd.                                 | Pharmacy      | 58. Afani Road, Iyiowo Odekpe, Anambra                       | Ogbaru         | Anambra |
| 454 | AN/0048 | AN/0048/S/4  | God,s Care Pharmaceutical Ltd.                        | Pharmacy      | 13, Ihembosi Street, Off, PH Rd., Woliwo Layout, Anambra Sta | Onitsha-North  | Anambra |
| 455 | AN/0050 | AN/0050/S/4  | Samino Pharmacy                                       | Pharmacy      | 30, Nwaziki Avenue, Awada, Onitsha, Anambra State            | Onitsha-North  | Anambra |
| 456 | AN/0052 | AN/0052/S/4  | Arimans Pharmacy                                      | Pharmacy      | 1 Court Road, Onitsha, Anambra                               | Onitsha-North  | Anambra |
| 457 | AN/0053 | AN/0053/S/4  | Karibu Pharmaceuticals Ltd.                           | Pharmacy      | 8A, Upper New Market Road, Onitsha, Anambra State.           | Onitsha-North  | Anambra |
| 458 | AN/0054 | AN/0054/S/4  | Wisdom Pharmacy Ltd.                                  | Pharmacy      | 136, Oguta Road, Onitsha, Anambra State.                     | Onitsha-North  | Anambra |

|     |         |              |                                 |            |                                                            |               |         |
|-----|---------|--------------|---------------------------------|------------|------------------------------------------------------------|---------------|---------|
| 459 | AN/0056 | AN/0056/S/4  | Hollywood Chemists              | Pharmacy   | 38, Oguta Road, Onitsha, Anambra State                     | Onitsha-North | Anambra |
| 460 | AN/0060 | AN/0060/S/4  | Crispa Solar Pharm. Ltd.        | Pharmacy   | 3, Ogbunike Street, Nkpor Ago, Onitsha, Anambra State.     | Idemili North | Anambra |
| 461 | AN/0061 | AN/0061/S/4  | Paxs Pharmaceuticals Ltd.,      | Pharmacy   | 2, Market Road, Nkpor Junction Onitsha, Anambra            | Idemili North | Anambra |
| 462 | AN/0062 | AN/0062/S/4  | Selar Pharmacy Ltd.             | Pharmacy   | 101 Onitsha Road, Nnewi, Anambra State.                    | Nnewi North   | Anambra |
| 463 | AN/0065 | AN/0065/S/4  | Lillimeg Pharmacy               | Pharmacy   | 378, Azikiwe Avenue, Awka, Anambra State                   | Anaocha       | Anambra |
| 464 | AN/0066 | AN/0066/S/4  | Georgie Chemist                 | Pharmacy   | 69, Ziks Avenue, Awka, Anambra State.                      | Onitsha-North | Anambra |
| 465 | AN/0067 | AN/0067/S    | Wikason Pharmaceuticals         | Pharmacy   | 1 Nwagu Junction, Nwagu, Agulu, Anambra State.             | Onitsha-North | Anambra |
| 466 | AN/0068 | AN/0068/S/5  | Chuks Medical Diagnostic Lab.   | Laboratory | 8A Bishop Onyeabor Street Inland Town, Onitsha,            | Onitsha-North | Anambra |
| 467 | AN/0070 | AN/0070/S/5  | Fezi Med. Laboratory            | Laboratory | 62A Old Market Road, Onitsha, Anambra                      | Onitsha-North | Anambra |
| 468 | AN/0071 | AN/0071/S/5  | Lisom Reference Laboratory      | Laboratory | 46 Old Market Road, Onitsha, Anambra State                 | Onitsha-North | Anambra |
| 469 | AN/0073 | AN/0073/S/5  | Gem Medical Laboratories        | Laboratory | 3A Tasia Road, Onitsha, Anambra State.                     | Onitsha-North | Anambra |
| 470 | AN/0074 | AN/0074/S/5  | Olive Medical Laboratory        | Laboratory | 51 Old Market Road, Onitsha, Anambra State                 | Onitsha-North | Anambra |
| 471 | AN/0075 | AN/0075/S/5  | Dozie Medical Laboratory        | Laboratory | 14, Awka Road, Onitsha, Anambra State                      | Idemili North | Anambra |
| 472 | AN/0077 | AN/0077/S/5  | Chuks Med. Lab.                 | Laboratory | 48 Owerri, Road, Nnewi, Onitsha                            | Nnewi South   | Anambra |
| 473 | AN/0080 | AN/0080/S/5  | Glanson Medical Laboratory      | Laboratory | Awka, Anambra State                                        | Awka North    | Anambra |
| 474 | AN/0086 | AN/0086/S/4  | Holy Rosary Specialist Hospital |            | Waterside, Along Bank of the Niger, Onitsha, Anambra State | Onitsha-North | Anambra |
| 475 | AN/0086 | AN/0086/S/3  | Holy Rosary Specialist Hospital |            | Waterside, Along Bank of the Niger, Onitsha, Anambra State | Onitsha-North | Anambra |
| 476 | AN/0086 | AN/0086/S/5  | Holy Rosary Specialist Hospital |            | Waterside, Along Bank of the Niger, Onitsha, Anambra State | Onitsha-North | Anambra |
| 477 | AN/0086 | AN/0086/S/2  | Holy Rosary Specialist Hospital |            | Waterside, Along Bank of the Niger, Onitsha, Anambra State | Onitsha-North | Anambra |
| 478 | AN/0086 | AN/0086/S/14 | Holy Rosary Specialist Hospital |            | Waterside, Along Bank of the Niger, Onitsha, Anambra State | Onitsha-North | Anambra |
| 479 | AN/0087 | AN/0087/S/5  | Ifebi Medical Centre            |            | 16A, Igwebuike School Road, Awka, Anambra State            | Awka South    | Anambra |
| 480 | AN/0087 | AN/0087/S/2  | Ifebi Medical Centre            |            | 16A, Igwebuike School Road, Awka, Anambra State            | Awka South    | Anambra |
| 481 | AN/0087 | AN/0087/S/7  | Ifebi Medical Centre            |            | 16A, Igwebuike School Road, Awka, Anambra State            | Awka South    | Anambra |
| 482 | AN/0087 | AN/0087/S/14 | Ifebi Medical Centre            |            | 16A, Igwebuike School Road, Awka, Anambra State            | Awka South    | Anambra |
| 483 | AN/0088 | AN/0088/S/14 | Beluchukwu Memorial Hospital    |            | Nkwo, Enugu-Ukwu, Anambra State                            | Njikoka       | Anambra |
| 484 | AN/0088 | AN/0088/S/5  | Beluchukwu Memorial Hospital    |            | Nkwo, Enugu-Ukwu, Anambra State                            | Njikoka       | Anambra |
| 485 | AN/0088 | AN/0088/S/7  | Beluchukwu Memorial Hospital    |            | Nkwo, Enugu-Ukwu, Anambra State                            | Njikoka       | Anambra |
| 486 | AN/0091 | AN/0091/S/11 | St. Charles Borromeo Hospital   |            | Off Limca Road, Onitsha, Anambra State                     | Onitsha-North | Anambra |
| 487 | AN/0091 | AN/0091/S/4  | St. Charles Borromeo Hospital   |            | Off Limca Road, Onitsha, Anambra State                     | Onitsha-North | Anambra |
| 488 | AN/0091 | AN/0091/S/5  | St. Charles Borromeo Hospital   |            | Off Limca Road, Onitsha, Anambra State                     | Onitsha-North | Anambra |
| 489 | AN/0091 | AN/0091/S/1  | St. Charles Borromeo Hospital   |            | Off Limca Road, Onitsha, Anambra State                     | Onitsha-North | Anambra |
| 490 | AN/0091 | AN/0091/S/6  | St. Charles Borromeo Hospital   |            | Off Limca Road, Onitsha, Anambra State                     | Onitsha-North | Anambra |
| 491 | AN/0097 | AN/0097/S/3  | The Light Specialist Hospital   |            | No. 40, Eme Court Rd., Umudim, Nnewi, Anambra State        | Nnewi North   | Anambra |
| 492 | AN/0099 | AN/0099/S/1  | Chimex Specialist Hospital      |            | No. 87 Ezemewi Road, Nnewichi, Nnewi, Anambra State        | Nnewi North   | Anambra |
| 493 | AN/0099 | AN/0099/S/5  | Chimex Specialist Hospital      |            | No. 87 Ezemewi Road, Nnewichi, Nnewi, Anambra State        | Nnewi North   | Anambra |
| 494 | AN/0101 | AN/0101/S/4  | Zion Noel Pharmacy Ltd          | Pharmacy   | No 5 Oranye Street Off Old mkt Rd Onitsha                  | Onitsha-North | Anambra |
| 495 | AN/0102 | AN/0102/S/4  | Gauze Pharmacy                  | Pharmacy   | No 10 Oko Road Ekuloba Aguata                              | Aguata        | Anambra |

|     |         |              |                                          |                                                                                       |                                                   |                |         |
|-----|---------|--------------|------------------------------------------|---------------------------------------------------------------------------------------|---------------------------------------------------|----------------|---------|
| 496 | AN/0103 | AN/0103/S/11 | St Charles Borromeo Hospital             | General Surgery, O&G, Int. medicine, Paediatrics, Physiotherapy, Pharmacy, Laboratory | Off Limca Road Onitsha Anambra St                 | Onitsha-North  | Anambra |
| 497 | AN/0103 | AN/0103/S/6  | St Charles Borromeo Hospital             | General Surgery, O&G, Int. medicine, Paediatrics, Physiotherapy, Pharmacy, Laboratory | Off Limca Road Onitsha Anambra St                 | Onitsha-North  | Anambra |
| 498 | AN/0103 | AN/0103/S/1  | St Charles Borromeo Hospital             | General Surgery, O&G, Int. medicine, Paediatrics, Physiotherapy, Pharmacy, Laboratory | Off Limca Road Onitsha Anambra St                 | Onitsha-North  | Anambra |
| 499 | AN/0103 | AN/0103/S/3  | St Charles Borromeo Hospital             | General Surgery, O&G, Int. medicine, Paediatrics, Physiotherapy, Pharmacy, Laboratory | Off Limca Road Onitsha Anambra St                 | Onitsha-North  | Anambra |
| 500 | AN/0103 | AN/0103/S/5  | St Charles Borromeo Hospital             | General Surgery, O&G, Int. medicine, Paediatrics, Physiotherapy, Pharmacy, Laboratory | Off Limca Road Onitsha Anambra St                 | Onitsha-North  | Anambra |
| 501 | AN/0103 | AN/0103/S/4  | St Charles Borromeo Hospital             | General Surgery, O&G, Int. medicine, Paediatrics, Physiotherapy, Pharmacy, Laboratory | Off Limca Road Onitsha Anambra St                 | Onitsha-North  | Anambra |
| 502 | AN/0103 | AN/0103/S/2  | St Charles Borromeo Hospital             | General Surgery, O&G, Int. medicine, Paediatrics, Physiotherapy, Pharmacy, Laboratory | Off Limca Road Onitsha Anambra St                 | Onitsha-North  | Anambra |
| 503 | AN/0105 | AN/0105/S/5  | Queen's Laboratory                       | Laboratory                                                                            | 129 P/H Road Fegge, Onitsha                       | Onitsha -South | Anambra |
| 504 | AN/0119 | AN/0119/S/3  | The Life Specialist Hospital             | O&G, Laboratory                                                                       | No. 7, Ikemba Drive, Umudim, Nnewi, Anambra State | Nnewi North    | Anambra |
| 505 | AN/0119 | AN/0119/S/5  | The Life Specialist Hospital             | O&G, Laboratory                                                                       | No. 7, Ikemba Drive, Umudim, Nnewi, Anambra State | Nnewi North    | Anambra |
| 506 | AN/0123 | AN/0123/S/1  | Sefton Specialist Medical Centre         |                                                                                       | 5, Onubuya Street, off Court Road, Akwa           | Awka North     | Anambra |
| 507 | AN/0123 | AN/0123/S/5  | Sefton Specialist Medical Centre         |                                                                                       | 5, Onubuya Street, off Court Road, Akwa           | Awka North     | Anambra |
| 508 | AN/0123 | AN/0123/S/7  | Sefton Specialist Medical Centre         |                                                                                       | 5, Onubuya Street, off Court Road, Akwa           | Awka North     | Anambra |
| 509 | AN/0124 | AN/0124/S/5  | Federal College of Education (Technical) | Primary, Pharmacy, Laboratory                                                         | Umunze, Anambra State                             | Orumba South   | Anambra |
| 510 | AN/0124 | AN/0124/S/4  | Federal College of Education (Technical) | Primary, Pharmacy, Laboratory                                                         | Umunze, Anambra State                             | Orumba South   | Anambra |
| 511 | AN/0133 | AN/0133/S/7  | CROWN HOSPITAL                           |                                                                                       | UMUOJI ROAD,MKPOR, ANAMBRA STATE                  | Idemili North  | Anambra |
| 512 | AN/0133 | AN/0133/S/5  | CROWN HOSPITAL                           |                                                                                       | UMUOJI ROAD,MKPOR, ANAMBRA STATE                  | Idemili North  | Anambra |
| 513 | AN/0135 | AN/0135/S/5  | Dionye Memorial Hospital                 |                                                                                       | OKPO VILLAGE,EKWULOBIA, ANAMBRA                   | Aguata         | Anambra |
| 514 | AN/0138 | AN/0138/S/7  | IMMACULATE HEART HOSPITAL AND MAT.       |                                                                                       | OLD ENUGU-ONITSHA                                 | Idemili North  | Anambra |
| 515 | AN/0138 | AN/0138/S/3  | IMMACULATE HEART HOSPITAL AND MAT.       |                                                                                       | OLD ENUGU-ONITSHA                                 | Idemili North  | Anambra |
| 516 | AN/0138 | AN/0138/S/1  | IMMACULATE HEART HOSPITAL AND MAT.       |                                                                                       | OLD ENUGU-ONITSHA                                 | Idemili North  | Anambra |
| 517 | AN/0138 | AN/0138/S/5  | IMMACULATE HEART HOSPITAL AND MAT.       |                                                                                       | OLD ENUGU-ONITSHA                                 | Idemili North  | Anambra |
| 518 | AN/0140 | AN/0140/S/5  | Nnamdi Azikwe University Medical Centre  |                                                                                       | AWKA                                              | Awka South     | Anambra |
| 519 | AN/0140 | AN/0140/S/1  | Nnamdi Azikwe University Medical Centre  |                                                                                       | AWKA                                              | Awka South     | Anambra |

|     |         |              |                                             |                   |                                                       |                |         |
|-----|---------|--------------|---------------------------------------------|-------------------|-------------------------------------------------------|----------------|---------|
| 520 | AN/0140 | AN/0140/S/4  | Nnamdi Azikwe University Medical Centre     |                   | AWKA                                                  | Awka South     | Anambra |
| 521 | AN/0142 | AN/0142/S/5  | PARAGON HOSPITAL AND MAT.                   |                   | 7, BISHOP SHANAHAM STREET, FEGGE, ONITSHA             | Onitsha -South | Anambra |
| 522 | AN/0147 | AN/0147/S/14 | BEACON HOSPITAL & MATERNITY                 | PAEDIATRICS       | 10 BEACON HOSPITAL STR, AWKA                          | Awka South     | Anambra |
| 523 | AN/0147 | AN/0147/S/5  | BEACON HOSPITAL & MATERNITY                 | PAEDIATRICS       | 10 BEACON HOSPITAL STR, AWKA                          | Awka South     | Anambra |
| 524 | AN/0147 | AN/0147/S/6  | BEACON HOSPITAL & MATERNITY                 | PAEDIATRICS       | 10 BEACON HOSPITAL STR, AWKA                          | Awka South     | Anambra |
| 525 | AN/0149 | AN/0149/S/4  | ESKAY-NEZ                                   | PHARMACY          | 114C AWKA RD, ONITSHA                                 | Onitsha-North  | Anambra |
| 526 | AN/0154 | AN/0154/S/4  | JONACO PHARMACY STORES LTD                  | PHARMACY          | 45 OGUATA RD, ONITSHA                                 | Onitsha-North  | Anambra |
| 527 | AN/0159 | AN/0159/S    | NEW HOPE HOSPITAL & MAT.                    | RADIOLOGY         | 26, UMUNNA STR, ONITSHA                               | Onitsha -South | Anambra |
| 528 | AN/0163 | AN/0163/S/4  | OMED PHARMACY                               | PHARMACY          | 47, MODEBE AV, ONITSHA                                | Onitsha -South | Anambra |
| 529 | AN/0165 | AN/0165/S/7  | PIONEER X- RAY                              | RADIOLOGY         | 5 ONWUBUYA STR, OFF COURT RD, AWKA                    | Awka South     | Anambra |
| 530 | AN/0166 | AN/0166/S/5  | PRIME CONCEP CON. CHILD SPEC. HOSPITAL      | LABORATORY        | 36, OBOSI RD                                          | Idemili North  | Anambra |
| 531 | AN/0171 | AN/0171/S/1  | Apex Medical Centre                         |                   | Igbo-Ukwu                                             | Aguata         | Anambra |
| 532 | AN/0171 | AN/0171/S/7  | Apex Medical Centre                         |                   | Igbo-Ukwu                                             | Aguata         | Anambra |
| 533 | AN/0171 | AN/0171/S/3  | Apex Medical Centre                         |                   | Igbo-Ukwu                                             | Aguata         | Anambra |
| 534 | AN/0171 | AN/0171/S/5  | Apex Medical Centre                         |                   | Igbo-Ukwu                                             | Aguata         | Anambra |
| 535 | AN/0173 | AN/0173/S/3  | Pioneer Int. Spec Hospital                  |                   | Plot 193 Owele Ebo Estate, Onitsha                    | Onitsha -South | Anambra |
| 536 | AN/0173 | AN/0173/S/5  | Pioneer Int. Spec Hospital                  |                   | Plot 193 Owele Ebo Estate, Onitsha                    | Onitsha -South | Anambra |
| 537 | AN/0182 | AN/0182/S/5  | Nkem Medical Laboratory                     | Laboratory        | Umunze Orumba                                         | Orumba South   | Anambra |
| 538 | AN/0188 | AN/0188/S/3  | Divine Care Specialist Hospital & Maternity |                   | 77 Igwe Orizu Road, Otolo Nnewi                       | Nnewi North    | Anambra |
| 539 | AN/0191 | AN/0191/S/7  | Bex Memorial Hospital                       |                   | Km 1 Owerri Road, Onitsha                             | Onitsha-North  | Anambra |
| 540 | AN/0191 | AN/0191/S/1  | Bex Memorial Hospital                       |                   | Km 1 Owerri Road, Onitsha                             | Onitsha-North  | Anambra |
| 541 | AN/0191 | AN/0191/S/4  | Bex Memorial Hospital                       |                   | Km 1 Owerri Road, Onitsha                             | Onitsha-North  | Anambra |
| 542 | AN/0191 | AN/0191/S/3  | Bex Memorial Hospital                       |                   | Km 1 Owerri Road, Onitsha                             | Onitsha-North  | Anambra |
| 543 | AN/0191 | AN/0191/S/5  | Bex Memorial Hospital                       |                   | Km 1 Owerri Road, Onitsha                             | Onitsha-North  | Anambra |
| 544 | AN/0191 | AN/0191/S/2  | Bex Memorial Hospital                       |                   | Km 1 Owerri Road, Onitsha                             | Onitsha-North  | Anambra |
| 545 | AN/0192 | AN/0192/S/13 | Faith Eye Clinic                            | Optometry         | 40B Modebe Avenue, Onitsha                            | Onitsha -South | Anambra |
| 546 | AN/0195 | AN/0195/S/1  | St Victoria Specialist Hospital & Maternity |                   | 61 Orlu Ekwulobia                                     | Aguata         | Anambra |
| 547 | AN/0195 | AN/0195/S/2  | St Victoria Specialist Hospital & Maternity |                   | 61 Orlu Ekwulobia                                     | Aguata         | Anambra |
| 548 | AN/0195 | AN/0195/S/3  | St Victoria Specialist Hospital & Maternity |                   | 61 Orlu Ekwulobia                                     | Aguata         | Anambra |
| 549 | AN/0195 | AN/0195/S/6  | St Victoria Specialist Hospital & Maternity |                   | 61 Orlu Ekwulobia                                     | Aguata         | Anambra |
| 550 | AN/0197 | AN/0197/S/11 | Omega Physiotherapy                         | Physiotherapy     | 46 Old Hospital Road, Onitsha                         | Onitsha -South | Anambra |
| 551 | AN/0203 | AN/0203/S/3  | Bethsaida Specialist Hospital               |                   | Plot CL6, Pond Street Housing Estate, Feggae, Onitsha | Onitsha -South | Anambra |
| 552 | AN/0214 | AN/0214/S/5  | Our Lady Of Lourdes Hospital                |                   | Ihala, Anambra State                                  | Ihala          | Anambra |
| 553 | AN/0214 | AN/0214/S/1  | Our Lady Of Lourdes Hospital                |                   | Ihala, Anambra State                                  | Ihala          | Anambra |
| 554 | AN/0214 | AN/0214/S/3  | Our Lady Of Lourdes Hospital                |                   | Ihala, Anambra State                                  | Ihala          | Anambra |
| 555 | AN/0214 | AN/0214/S/2  | Our Lady Of Lourdes Hospital                |                   | Ihala, Anambra State                                  | Ihala          | Anambra |
| 556 | AN/0214 | AN/0214/S/6  | Our Lady Of Lourdes Hospital                |                   | Ihala, Anambra State                                  | Ihala          | Anambra |
| 557 | AN/0214 | AN/0214/S/10 | Our Lady Of Lourdes Hospital                |                   | Ihala, Anambra State                                  | Ihala          | Anambra |
| 558 | AN/0215 | AN/0215/S/5  | St. Mary's Hospital & Maternity             |                   | Agba Village, Ekwulobia, Anambra State.               | Aguata         | Anambra |
| 559 | AN/0216 | AN/0216/S/5  | His Glory Hospital & Maternity              |                   | 96 Arthur Eze Avenue, near Tracy Hotel, Awka          | Awka North     | Anambra |
| 560 | AN/0217 | AN/0217/S/5  | Kanayo Specialist Hospital & Maternity      | Laboratory, O & G | 17 Enugu Road, Onitsha                                | Onitsha -South | Anambra |

|     |         |              |                                            |                   |                                                                                  |                |         |
|-----|---------|--------------|--------------------------------------------|-------------------|----------------------------------------------------------------------------------|----------------|---------|
| 561 | AN/0217 | AN/0217/S/3  | Kanayo Specialist Hospital & Maternity     | Laboratory, O & G | 17 Enugu Road, Onitsha                                                           | Onitsha -South | Anambra |
| 562 | AN/0224 | AN/0224/S/3  | Obioma Specialist Hospital & maternity     |                   | 19 Onwukwe Street Abunor Nnewichi, Nnewi Anambra State                           | Nnewi North    | Anambra |
| 563 | AN/0225 | AN/0225/S/3  | St. Helen`s Specialist Hospital            |                   | Agbou Estate Behind Kenneth Dike Sec Sch Off Obinagu, Amawbia Awka Anambra State | Awka South     | Anambra |
| 564 | AN/0226 | AN/0226/S/7  | Toronto Hospital limited                   |                   | 2, Upper Niger Bridge Onitsha Anambra State                                      | Onitsha -South | Anambra |
| 565 | AN/0226 | AN/0226/S/5  | Toronto Hospital limited                   |                   | 2, Upper Niger Bridge Onitsha Anambra State                                      | Onitsha -South | Anambra |
| 566 | AN/0226 | AN/0226/S/15 | Toronto Hospital limited                   |                   | 2, Upper Niger Bridge Onitsha Anambra State                                      | Onitsha -South | Anambra |
| 567 | AN/0230 | AN/0230/S/2  | Okoye Specialist Hospital                  |                   | Barr Ajekwe Close Off 25 Emma                                                    | Awka South     | Anambra |
| 568 | AN/0231 | AN/0231/S/14 | Raginaceali Hospital                       |                   | Raginaceali Road Awka Anambra State                                              | Awka South     | Anambra |
| 569 | AN/0231 | AN/0231/S/5  | Raginaceali Hospital                       |                   | Raginaceali Road Awka Anambra State                                              | Awka South     | Anambra |
| 570 | AN/0231 | AN/0231/S/12 | Raginaceali Hospital                       |                   | Raginaceali Road Awka Anambra State                                              | Awka South     | Anambra |
| 571 | AN/0231 | AN/0231/S/2  | Raginaceali Hospital                       |                   | Raginaceali Road Awka Anambra State                                              | Awka South     | Anambra |
| 572 | AN/0231 | AN/0231/S/18 | Raginaceali Hospital                       |                   | Raginaceali Road Awka Anambra State                                              | Awka South     | Anambra |
| 573 | AN/0231 | AN/0231/S/3  | Raginaceali Hospital                       |                   | Raginaceali Road Awka Anambra State                                              | Awka South     | Anambra |
| 574 | AN/0231 | AN/0231/S/11 | Raginaceali Hospital                       |                   | Raginaceali Road Awka Anambra State                                              | Awka South     | Anambra |
| 575 | AN/0234 | AN/0234/S/5  | Okpala Hospital And Maternity              |                   | Enugwu-ukwu Near Ezi-Elias Anambra State                                         | Njikoka        | Anambra |
| 576 | AN/0235 | AN/0235/S/3  | Anambra State University Teaching Hospital |                   | Awka Amaku Anambra State                                                         | Awka South     | Anambra |
| 577 | AN/0235 | AN/0235/S/10 | Anambra State University Teaching Hospital |                   | Awka Amaku Anambra State                                                         | Awka South     | Anambra |
| 578 | AN/0235 | AN/0235/S/15 | Anambra State University Teaching Hospital |                   | Awka Amaku Anambra State                                                         | Awka South     | Anambra |
| 579 | AN/0235 | AN/0235/S/4  | Anambra State University Teaching Hospital |                   | Awka Amaku Anambra State                                                         | Awka South     | Anambra |
| 580 | AN/0235 | AN/0235/S/7  | Anambra State University Teaching Hospital |                   | Awka Amaku Anambra State                                                         | Awka South     | Anambra |
| 581 | AN/0235 | AN/0235/S/2  | Anambra State University Teaching Hospital |                   | Awka Amaku Anambra State                                                         | Awka South     | Anambra |
| 582 | AN/0235 | AN/0235/S/6  | Anambra State University Teaching Hospital |                   | Awka Amaku Anambra State                                                         | Awka South     | Anambra |
| 583 | AN/0235 | AN/0235/S/8  | Anambra State University Teaching Hospital |                   | Awka Amaku Anambra State                                                         | Awka South     | Anambra |
| 584 | AN/0235 | AN/0235/S/12 | Anambra State University Teaching Hospital |                   | Awka Amaku Anambra State                                                         | Awka South     | Anambra |
| 585 | AN/0235 | AN/0235/S/11 | Anambra State University Teaching Hospital |                   | Awka Amaku Anambra State                                                         | Awka South     | Anambra |
| 586 | AN/0235 | AN/0235/S/5  | Anambra State University Teaching Hospital |                   | Awka Amaku Anambra State                                                         | Awka South     | Anambra |
| 587 | AN/0235 | AN/0235/S/18 | Anambra State University Teaching Hospital |                   | Awka Amaku Anambra State                                                         | Awka South     | Anambra |
| 588 | AN/0237 | AN/0237/S/5  | Isaac Chira Memorial Hospital              |                   | Awkuzu Anambra State                                                             | Oyi            | Anambra |
| 589 | AN/0238 | AN/0238/S/3  | Cynvic Specialist Hospital                 |                   | General Hospital Road Agba Ekwulobia Anambra State                               | Aguata         | Anambra |
| 590 | AN/0238 | AN/0238/S/1  | Cynvic Specialist Hospital                 |                   | General Hospital Road Agba Ekwulobia Anambra State                               | Aguata         | Anambra |
| 591 | AN/0240 | AN/0240/S/5  | Our Lady Of Lourdes Hospital               |                   | Ihiala Anambra State                                                             | Ihala          | Anambra |
| 592 | AN/0240 | AN/0240/S/3  | Our Lady Of Lourdes Hospital               |                   | Ihiala Anambra State                                                             | Ihala          | Anambra |
| 593 | AN/0240 | AN/0240/S/4  | Our Lady Of Lourdes Hospital               |                   | Ihiala Anambra State                                                             | Ihala          | Anambra |
| 594 | AN/0240 | AN/0240/S/10 | Our Lady Of Lourdes Hospital               |                   | Ihiala Anambra State                                                             | Ihala          | Anambra |
| 595 | AN/0240 | AN/0240/S/1  | Our Lady Of Lourdes Hospital               |                   | Ihiala Anambra State                                                             | Ihala          | Anambra |



|     |         |              |                                           |  |                                                                           |               |         |
|-----|---------|--------------|-------------------------------------------|--|---------------------------------------------------------------------------|---------------|---------|
| 596 | AN/0243 | AN/0243/S/6  | Prime Specialist Hospital                 |  | 5, Nwufu Meniru Street Beside Bishop Crother Seminary, Awka Anambra State | Awka South    | Anambra |
| 597 | AN/0245 | AN/0245/S/11 | Landmark Physiotherapy                    |  | Behind Anaedo Social Club Hqt Nnewi Anambra State                         | Nnewi North   | Anambra |
| 598 | AN/0247 | AN/0247/S/2  | Nnewi Diocesan Hospital                   |  | Igwe Orizu Road Otolo, Nnewi Anambra State                                | Ogbaru        | Anambra |
| 599 | AN/0249 | AN/0249/S/3  | Bethsaida Specialist Hospital             |  | 48b Nnobi Road Opp. Nnewi High School, Nnewi Anambra State                | Awka South    | Anambra |
| 600 | AN/0252 | AN/0252/S/5  | Safecheck Laboratories Limited            |  | 7No 74 F.G. Onyiuke Avenue, Nimo. Anambra State.                          | Njikoka       | Anambra |
| 601 | AN/0253 | AN/0253/S/1  | Beke Memorial Hospital                    |  | 64 F.G Onyiuke Avenue, Nimo Anambra State                                 | Njikoka       | Anambra |
| 602 | AN/0253 | AN/0253/S/3  | Beke Memorial Hospital                    |  | 64 F.G Onyiuke Avenue, Nimo Anambra State                                 | Njikoka       | Anambra |
| 603 | AN/0253 | AN/0253/S/2  | Beke Memorial Hospital                    |  | 64 F.G Onyiuke Avenue, Nimo Anambra State                                 | Njikoka       | Anambra |
| 604 | AN/0253 | AN/0253/S/6  | Beke Memorial Hospital                    |  | 64 F.G Onyiuke Avenue, Nimo Anambra State                                 | Njikoka       | Anambra |
| 605 | AN/0254 | AN/0254/S/3  | Obioma Hospital                           |  | 5/7 Anuka Road Otolo, Nnewi Anambra State.                                | Nnewi North   | Anambra |
| 606 | AN/0255 | AN/0255/S/3  | Mercy Specialist Hospital And Maternity   |  | 4A New American Road, Onitsha, Anambra State                              | Onitsha-North | Anambra |
| 607 | AN/0255 | AN/0255/S/1  | Mercy Specialist Hospital And Maternity   |  | 4A New American Road, Onitsha, Anambra State                              | Onitsha-North | Anambra |
| 608 | AN/0255 | AN/0255/S/6  | Mercy Specialist Hospital And Maternity   |  | 4A New American Road, Onitsha, Anambra State                              | Onitsha-North | Anambra |
| 609 | AN/0255 | AN/0255/S/2  | Mercy Specialist Hospital And Maternity   |  | 4A New American Road, Onitsha, Anambra State                              | Onitsha-North | Anambra |
| 610 | AN/0256 | AN/0256/S/6  | St. Joseph's Hospital                     |  | Adazi Nnukwu, Anambra State                                               | Anaocha       | Anambra |
| 611 | AN/0256 | AN/0256/S/2  | St. Joseph's Hospital                     |  | Adazi Nnukwu, Anambra State                                               | Anaocha       | Anambra |
| 612 | AN/0256 | AN/0256/S/3  | St. Joseph's Hospital                     |  | Adazi Nnukwu, Anambra State                                               | Anaocha       | Anambra |
| 613 | AN/0256 | AN/0256/S/5  | St. Joseph's Hospital                     |  | Adazi Nnukwu, Anambra State                                               | Anaocha       | Anambra |
| 614 | AN/0256 | AN/0256/S/1  | St. Joseph's Hospital                     |  | Adazi Nnukwu, Anambra State                                               | Anaocha       | Anambra |
| 615 | AN/0256 | AN/0256/S/10 | St. Joseph's Hospital                     |  | Adazi Nnukwu, Anambra State                                               | Anaocha       | Anambra |
| 616 | AN/0256 | AN/0256/S/4  | St. Joseph's Hospital                     |  | Adazi Nnukwu, Anambra State                                               | Anaocha       | Anambra |
| 617 | AN/0257 | AN/0257/S/10 | Regina Caeli Specialist Hospital          |  | 17, Regina Caeli Road, Awka Anambra State                                 | Awka South    | Anambra |
| 618 | AN/0257 | AN/0257/S/7  | Regina Caeli Specialist Hospital          |  | 17, Regina Caeli Road, Awka Anambra State                                 | Awka South    | Anambra |
| 619 | AN/0257 | AN/0257/S/1  | Regina Caeli Specialist Hospital          |  | 17, Regina Caeli Road, Awka Anambra State                                 | Awka South    | Anambra |
| 620 | AN/0259 | AN/0259/S/11 | Rice Clinic                               |  | Rise- Gopat Building Agulu-Nnobi Road Adazi-Ani, Anambra State            | Anaocha       | Anambra |
| 621 | AN/0259 | AN/0259/S/5  | Rice Clinic                               |  | Rise- Gopat Building Agulu-Nnobi Road Adazi-Ani, Anambra State            | Anaocha       | Anambra |
| 622 | AN/0259 | AN/0259/S/7  | Rice Clinic                               |  | Rise- Gopat Building Agulu-Nnobi Road Adazi-Ani, Anambra State            | Anaocha       | Anambra |
| 623 | AN/0259 | AN/0259/S/13 | Rice Clinic                               |  | Rise- Gopat Building Agulu-Nnobi Road Adazi-Ani, Anambra State            | Anaocha       | Anambra |
| 624 | AN/0259 | AN/0259/S/4  | Rice Clinic                               |  | Rise- Gopat Building Agulu-Nnobi Road Adazi-Ani, Anambra State            | Anaocha       | Anambra |
| 625 | AN/0259 | AN/0259/S/3  | Rice Clinic                               |  | Rise- Gopat Building Agulu-Nnobi Road Adazi-Ani, Anambra State            | Anaocha       | Anambra |
| 626 | AN/0260 | AN/0260/S/6  | Ezinne Hospital & Children Welfare Centre |  | 1A Oboli Lane, DMGS Round About Onisha, Anambra State                     | Onitsha-North | Anambra |
| 627 | AN/0261 | AN/0261/S/1  | Kandudi Specialist Hospital               |  | Oye Market, Achina Anambra State                                          | Aguata        | Anambra |
| 628 | AN/0261 | AN/0261/S/3  | Kandudi Specialist Hospital               |  | Oye Market, Achina Anambra State                                          | Aguata        | Anambra |
| 629 | AN/0262 | AN/0262/S/5  | Bright Medical Laboratory                 |  | Oye Market Achina, Anambra State                                          | Aguata        | Anambra |
| 630 | AN/0263 | AN/0263/S/14 | Dike Medical Centre                       |  | Ebenebe Anambra State                                                     | Awka North    | Anambra |
| 631 | AN/0266 | AN/0266/S/4  | Joez Pharmacy                             |  | 81, Zik Avenue Awka, Anambra State                                        | Awka South    | Anambra |

|     |         |              |                                                     |                                                                               |                                                                  |               |         |
|-----|---------|--------------|-----------------------------------------------------|-------------------------------------------------------------------------------|------------------------------------------------------------------|---------------|---------|
| 632 | AN/0267 | AN/0267/S/1  | Edozie Hospital & Maternity                         |                                                                               | 5, Omanukwue Crescent, Obieze Village, Ifite Duru, Anambra State | Dunukofia     | Anambra |
| 633 | AN/0267 | AN/0267/S/14 | Edozie Hospital & Maternity                         |                                                                               | 5, Omanukwue Crescent, Obieze Village, Ifite Duru, Anambra State | Dunukofia     | Anambra |
| 634 | AN/0267 | AN/0267/S/3  | Edozie Hospital & Maternity                         |                                                                               | 5, Omanukwue Crescent, Obieze Village, Ifite Duru, Anambra State | Dunukofia     | Anambra |
| 635 | AN/0267 | AN/0267/S/2  | Edozie Hospital & Maternity                         |                                                                               | 5, Omanukwue Crescent, Obieze Village, Ifite Duru, Anambra State | Dunukofia     | Anambra |
| 636 | AN/0268 | AN/0268/S/6  | Obijackson Hospital                                 |                                                                               | No 2 Madonna University Road, Okija, Anambra State               | Ihala         | Anambra |
| 637 | AN/0268 | AN/0268/S/5  | Obijackson Hospital                                 |                                                                               | No 2 Madonna University Road, Okija, Anambra State               | Ihala         | Anambra |
| 638 | AN/0268 | AN/0268/S/4  | Obijackson Hospital                                 |                                                                               | No 2 Madonna University Road, Okija, Anambra State               | Ihala         | Anambra |
| 639 | AN/0268 | AN/0268/S/3  | Obijackson Hospital                                 |                                                                               | No 2 Madonna University Road, Okija, Anambra State               | Ihala         | Anambra |
| 640 | AN/0270 | AN/0270/S/13 | Hepzibah Eye Clinic                                 |                                                                               | 40 Court Road, Awka Anambra State                                | Awka South    | Anambra |
| 641 | AN/0271 | AN/0271/S/5  | Sun Medical Diagnostic                              |                                                                               | General Hospital ,Awka Road, Onitsha Anambra State               | Onitsha-North | Anambra |
| 642 | AN/0271 | AN/0271/S/7  | Sun Medical Diagnostic                              |                                                                               | General Hospital ,Awka Road, Onitsha Anambra State               | Onitsha-North | Anambra |
| 643 | AN/0274 | AN/0274/S/5  | Aguata Diocesan Hospital Igboukwu                   |                                                                               | Divine Grace Villa 2 Rd 3 Abuja Estate Awka, Anambra State       | Awka South    | Anambra |
| 644 | AN/0274 | AN/0274/S/3  | Aguata Diocesan Hospital Igboukwu                   |                                                                               | Divine Grace Villa 2 Rd 3 Abuja Estate Awka, Anambra State       | Awka South    | Anambra |
| 645 | AN/0276 | AN/0276/S/5  | Ennembo Biomedical Diagnostic Laboratory            |                                                                               | 23,Ugwunabankpa Rd, Onitsha Anambra State                        | Onitsha-North | Anambra |
| 646 | BA/0002 | BA/0002/S/3  | Mai Jama'A Clinic                                   |                                                                               | Wunti Street, Bauchi                                             | Bauchi        | Bauchi  |
| 647 | BA/0002 | BA/0002/S/1  | Mai Jama'A Clinic                                   |                                                                               | Wunti Street, Bauchi                                             | Bauchi        | Bauchi  |
| 648 | BA/0006 | BA/0006/S/8  | Abubakar Tafawa Balewa University Teaching Hospital | O & G, Gen. Surg., Paediatrics, ENT, Pharm., Radiology, Physiotherapy, Dental | Bauchi, Bauchi State                                             | Bauchi        | Bauchi  |
| 649 | BA/0006 | BA/0006/S/1  | Abubakar Tafawa Balewa University Teaching Hospital | O & G, Gen. Surg., Paediatrics, ENT, Pharm., Radiology, Physiotherapy, Dental | Bauchi, Bauchi State                                             | Bauchi        | Bauchi  |
| 650 | BA/0006 | BA/0006/S/12 | Abubakar Tafawa Balewa University Teaching Hospital | O & G, Gen. Surg., Paediatrics, ENT, Pharm., Radiology, Physiotherapy, Dental | Bauchi, Bauchi State                                             | Bauchi        | Bauchi  |
| 651 | BA/0006 | BA/0006/S/3  | Abubakar Tafawa Balewa University Teaching Hospital | O & G, Gen. Surg., Paediatrics, ENT, Pharm., Radiology, Physiotherapy, Dental | Bauchi, Bauchi State                                             | Bauchi        | Bauchi  |
| 652 | BA/0006 | BA/0006/S/6  | Abubakar Tafawa Balewa University Teaching Hospital | O & G, Gen. Surg., Paediatrics, ENT, Pharm., Radiology, Physiotherapy, Dental | Bauchi, Bauchi State                                             | Bauchi        | Bauchi  |
| 653 | BA/0006 | BA/0006/S/7  | Abubakar Tafawa Balewa University Teaching Hospital | O & G, Gen. Surg., Paediatrics, ENT, Pharm., Radiology, Physiotherapy, Dental | Bauchi, Bauchi State                                             | Bauchi        | Bauchi  |

|     |         |              |                                                     |                                                                               |                                               |            |        |
|-----|---------|--------------|-----------------------------------------------------|-------------------------------------------------------------------------------|-----------------------------------------------|------------|--------|
| 654 | BA/0006 | BA/0006/S/11 | Abubakar Tafawa Balewa University Teaching Hospital | O & G, Gen. Surg., Paediatrics, ENT, Pharm., Radiology, Physiotherapy, Dental | Bauchi, Bauchi State                          | Bauchi     | Bauchi |
| 655 | BA/0006 | BA/0006/S/4  | Abubakar Tafawa Balewa University Teaching Hospital | O & G, Gen. Surg., Paediatrics, ENT, Pharm., Radiology, Physiotherapy, Dental | Bauchi, Bauchi State                          | Bauchi     | Bauchi |
| 656 | BA/0010 | BA/0010/S/4  | Sahelian Pharm. Ltd.,                               | Pharmacy                                                                      | No. 6, Yandoka Road, P.M.B 2505, Bauchi       | Bauchi     | Bauchi |
| 657 | BA/0012 | BA/0012/S/4  | Tinma Pharmaceutical Chemist                        | Pharmacy                                                                      | C1 Kobi Street, Bauchi                        | Bauchi     | Bauchi |
| 658 | BA/0014 | BA/0014/S/5  | Lisa Laboratory                                     | Laboratory                                                                    | No. 1, Boni Haruna Street, Bauchi.            | Bauchi     | Bauchi |
| 659 | BA/0015 | BA/0015/S/5  | Gaskiya Laboratory                                  | Laboratory                                                                    | Ran Road, Bauchi                              | Bauchi     | Bauchi |
| 660 | BA/0016 | BA/0016/S/4  | Nana Rich Med. Laboratory                           | Laboratory                                                                    | Auwal Shopping Complex, Johun Road, Bauchi    | Bauchi     | Bauchi |
| 661 | BA/0017 | BA/0017/S/4  | Safara Pharm. Ltd                                   | Pharmacy                                                                      | No. 5, Hospital Road, Bauchi                  | Bauchi     | Bauchi |
| 662 | BA/0023 | BA/0023/S/3  | Niima Consultant Hospital - Bauchi                  |                                                                               | Niima Close, Off Airport Rd. Bauchi           | Bauchi     | Bauchi |
| 663 | BA/0023 | BA/0023/S/5  | Niima Consultant Hospital - Bauchi                  |                                                                               | Niima Close, Off Airport Rd. Bauchi           | Bauchi     | Bauchi |
| 664 | BA/0023 | BA/0023/S/4  | Niima Consultant Hospital - Bauchi                  |                                                                               | Niima Close, Off Airport Rd. Bauchi           | Bauchi     | Bauchi |
| 665 | BA/0023 | BA/0023/S/7  | Niima Consultant Hospital - Bauchi                  |                                                                               | Niima Close, Off Airport Rd. Bauchi           | Bauchi     | Bauchi |
| 666 | BA/0023 | BA/0023/S/6  | Niima Consultant Hospital - Bauchi                  |                                                                               | Niima Close, Off Airport Rd. Bauchi           | Bauchi     | Bauchi |
| 667 | BA/0023 | BA/0023/S/1  | Niima Consultant Hospital - Bauchi                  |                                                                               | Niima Close, Off Airport Rd. Bauchi           | Bauchi     | Bauchi |
| 668 | BA/0023 | BA/0023/S/8  | Niima Consultant Hospital - Bauchi                  |                                                                               | Niima Close, Off Airport Rd. Bauchi           | Bauchi     | Bauchi |
| 669 | BA/0023 | BA/0023/S/2  | Niima Consultant Hospital - Bauchi                  |                                                                               | Niima Close, Off Airport Rd. Bauchi           | Bauchi     | Bauchi |
| 670 | BA/0025 | BA/0025/S/15 | Federal Medical Centre - Azare                      |                                                                               | P.M.B. 005, Azare, Bauchi State.              | Katagum    | Bauchi |
| 671 | BA/0025 | BA/0025/S/12 | Federal Medical Centre - Azare                      |                                                                               | P.M.B. 005, Azare, Bauchi State.              | Katagum    | Bauchi |
| 672 | BA/0025 | BA/0025/S/3  | Federal Medical Centre - Azare                      |                                                                               | P.M.B. 005, Azare, Bauchi State.              | Katagum    | Bauchi |
| 673 | BA/0025 | BA/0025/S/4  | Federal Medical Centre - Azare                      |                                                                               | P.M.B. 005, Azare, Bauchi State.              | Katagum    | Bauchi |
| 674 | BA/0025 | BA/0025/S/6  | Federal Medical Centre - Azare                      |                                                                               | P.M.B. 005, Azare, Bauchi State.              | Katagum    | Bauchi |
| 675 | BA/0025 | BA/0025/S/7  | Federal Medical Centre - Azare                      |                                                                               | P.M.B. 005, Azare, Bauchi State.              | Katagum    | Bauchi |
| 676 | BA/0025 | BA/0025/S/5  | Federal Medical Centre - Azare                      |                                                                               | P.M.B. 005, Azare, Bauchi State.              | Katagum    | Bauchi |
| 677 | BA/0025 | BA/0025/S/1  | Federal Medical Centre - Azare                      |                                                                               | P.M.B. 005, Azare, Bauchi State.              | Katagum    | Bauchi |
| 678 | BA/0027 | BA/0027/S/8  | 33 AB MRS Bauchi                                    |                                                                               | Bauchi, Bauchi State                          | Bauchi     | Bauchi |
| 679 | BA/0027 | BA/0027/S/5  | 33 AB MRS Bauchi                                    |                                                                               | Bauchi, Bauchi State                          | Bauchi     | Bauchi |
| 680 | BA/0033 | BA/0033/S/4  | Abubakar Tafawa Balewa Health Centre                |                                                                               | Bauchi, Bauchi State                          | Bauchi     | Bauchi |
| 681 | BA/0033 | BA/0033/S/1  | Abubakar Tafawa Balewa Health Centre                |                                                                               | Bauchi, Bauchi State                          | Bauchi     | Bauchi |
| 682 | BA/0067 | BA/0067/S/6  | Alwadata Consultant Clinic                          | PRIMARY                                                                       | 7 KWANI CLOSE FADAMI CLOSE MADA BAUCHI        | Bauchi     | Bauchi |
| 683 | BA/0073 | BA/0073/S/4  | NEEBEN PHARMACY LIMITED                             |                                                                               | B 295 WUNTI STREET- BAUCHI STATE              | Itas/Gadua | Bauchi |
| 684 | BA/0074 | BA/0074/S/8  | Ubani Dental Clinic                                 | Dental                                                                        | 1 Boni Haruna Street, Bauchi                  | Bauchi     | Bauchi |
| 685 | BA/0077 | BA/0077/S/4  | Zamani Pharmaceutical Chemist                       | Pharmacy                                                                      | Along Federal Lowcost/Railway Road            | Bauchi     | Bauchi |
| 686 | BA/0080 | BA/0080/S/4  | Yankari Pharmacy                                    | Pharmacy                                                                      | 203 Railway Road, Bauchi                      | Bauchi     | Bauchi |
| 687 | BA/0081 | BA/0081/S/4  | Frontier Pharmaceutical Ltd                         | Pharmacy                                                                      | 17 & 18 Basma Plaza, Yelwan Makaranta, Bauchi | Bauchi     | Bauchi |
| 688 | BA/0091 | BA/0091/S/15 | Makkah Specialist Eye Hospital                      |                                                                               | Old Ministry of Works, Kobi Street Bauchi     | Bauchi     | Bauchi |
| 689 | BA/0091 | BA/0091/S/13 | Makkah Specialist Eye Hospital                      |                                                                               | Old Ministry of Works, Kobi Street Bauchi     | Bauchi     | Bauchi |
| 690 | BA/0092 | BA/0092/S/4  | National Fistula Clinic                             |                                                                               | Ningi, Bauchi State.                          | Ningi      | Bauchi |
| 691 | BA/0093 | BA/0093/S/4  | Idyllic Pharmacare Nig. Limited.                    |                                                                               | A558, Ajiya Adamu Road, Bauchi, Bauchi State. | Bauchi     | Bauchi |

|     |         |              |                                            |                                                                                                                              |                                                            |             |        |
|-----|---------|--------------|--------------------------------------------|------------------------------------------------------------------------------------------------------------------------------|------------------------------------------------------------|-------------|--------|
| 692 | BA/0094 | BA/0094/S/11 | Ages Physiotherapy & Rehabilitation Clinic |                                                                                                                              | 5, Maiduguri Bye-Pass, Bauchi, Bauchi State                | Bauchi      | Bauchi |
| 693 | BA/0095 | BA/0095/S/4  | Allianz Preston Lue Pharmacy               |                                                                                                                              | No B288 Wunti Street Bauchi, Bauchi State.                 | Bauchi      | Bauchi |
| 694 | BN/0003 | BN/0003/S/5  | TBT Hospital                               |                                                                                                                              | 91, Cape Doanes Way, Gboko                                 | Gboko       | Benue  |
| 695 | BN/0011 | BN/0011/S/7  | General Hospital                           | Laboratory, Pharmacy, Radiology                                                                                              | Katsina-Ala                                                | Katsina-Ala | Benue  |
| 696 | BN/0012 | BN/0012/S/3  | Federal Medical Centre - Makurdi           |                                                                                                                              | Makurdi, Benue State                                       | Makurdi     | Benue  |
| 697 | BN/0012 | BN/0012/S/6  | Federal Medical Centre - Makurdi           |                                                                                                                              | Makurdi, Benue State                                       | Makurdi     | Benue  |
| 698 | BN/0012 | BN/0012/S/15 | Federal Medical Centre - Makurdi           |                                                                                                                              | Makurdi, Benue State                                       | Makurdi     | Benue  |
| 699 | BN/0012 | BN/0012/S/1  | Federal Medical Centre - Makurdi           |                                                                                                                              | Makurdi, Benue State                                       | Makurdi     | Benue  |
| 700 | BN/0015 | BN/0015/S/5  | Madonna Health Service Ltd.                |                                                                                                                              | (Madonna Hospital) New Bridge Road, Behind Union Bank Mkd  | Makurdi     | Benue  |
| 701 | BN/0015 | BN/0015/S/7  | Madonna Health Service Ltd.                |                                                                                                                              | (Madonna Hospital) New Bridge Road, Behind Union Bank Mkd  | Makurdi     | Benue  |
| 702 | BN/0015 | BN/0015/S/1  | Madonna Health Service Ltd.                |                                                                                                                              | (Madonna Hospital) New Bridge Road, Behind Union Bank Mkd  | Makurdi     | Benue  |
| 703 | BN/0015 | BN/0015/S/3  | Madonna Health Service Ltd.                |                                                                                                                              | (Madonna Hospital) New Bridge Road, Behind Union Bank Mkd  | Makurdi     | Benue  |
| 704 | BN/0015 | BN/0015/S/6  | Madonna Health Service Ltd.                |                                                                                                                              | (Madonna Hospital) New Bridge Road, Behind Union Bank Mkd  | Makurdi     | Benue  |
| 705 | BN/0015 | BN/0015/S/2  | Madonna Health Service Ltd.                |                                                                                                                              | (Madonna Hospital) New Bridge Road, Behind Union Bank Mkd  | Makurdi     | Benue  |
| 706 | BN/0018 | BN/0018/S/4  | Bishop Murray Medical Centre               |                                                                                                                              | Close To St. Theresa Church, High Level Makurdi            | Makurdi     | Benue  |
| 707 | BN/0019 | BN/0019/S/2  | Sandra Hospital                            |                                                                                                                              | 24, J.S. Tarka Road, Opp. Maltino Filling Station, Makurdi | Makurdi     | Benue  |
| 708 | BN/0020 | BN/0020/S/7  | Immaculate Conception Hospital             |                                                                                                                              | Walla Mayo, High Level, Makurdi                            | Makurdi     | Benue  |
| 709 | BN/0020 | BN/0020/S/1  | Immaculate Conception Hospital             |                                                                                                                              | Walla Mayo, High Level, Makurdi                            | Makurdi     | Benue  |
| 710 | BN/0020 | BN/0020/S/2  | Immaculate Conception Hospital             |                                                                                                                              | Walla Mayo, High Level, Makurdi                            | Makurdi     | Benue  |
| 711 | BN/0020 | BN/0020/S/10 | Immaculate Conception Hospital             |                                                                                                                              | Walla Mayo, High Level, Makurdi                            | Makurdi     | Benue  |
| 712 | BN/0020 | BN/0020/S/5  | Immaculate Conception Hospital             |                                                                                                                              | Walla Mayo, High Level, Makurdi                            | Makurdi     | Benue  |
| 713 | BN/0030 | BN/0030/S/6  | Grace Cottage Hospital                     |                                                                                                                              | 7, David Mark Bye Pass, Makurdi                            | Makurdi     | Benue  |
| 714 | BN/0030 | BN/0030/S/3  | Grace Cottage Hospital                     |                                                                                                                              | 7, David Mark Bye Pass, Makurdi                            | Makurdi     | Benue  |
| 715 | BN/0030 | BN/0030/S/1  | Grace Cottage Hospital                     |                                                                                                                              | 7, David Mark Bye Pass, Makurdi                            | Makurdi     | Benue  |
| 716 | BN/0030 | BN/0030/S/2  | Grace Cottage Hospital                     |                                                                                                                              | 7, David Mark Bye Pass, Makurdi                            | Makurdi     | Benue  |
| 717 | BN/0031 | BN/0031/S/4  | Federal Medical Centre                     | O&G, Paediatrics, Gen. Surgery, Ophthalmology, Dentistry, Physiotherapy, Radiology, laboratory, pharmacy & internal medicine | Makurdi, Benue State                                       | Makurdi     | Benue  |
| 718 | BN/0031 | BN/0031/S/5  | Federal Medical Centre                     | O&G, Paediatrics, Gen. Surgery, Ophthalmology, Dentistry, Physiotherapy, Radiology, laboratory, pharmacy & internal medicine | Makurdi, Benue State                                       | Makurdi     | Benue  |
| 719 | BN/0031 | BN/0031/S/7  | Federal Medical Centre                     | O&G, Paediatrics, Gen. Surgery, Ophthalmology, Dentistry, Physiotherapy, Radiology, laboratory, pharmacy & internal medicine | Makurdi, Benue State                                       | Makurdi     | Benue  |

|     |         |              |                                   |                                                                                                                              |                                                   |         |       |
|-----|---------|--------------|-----------------------------------|------------------------------------------------------------------------------------------------------------------------------|---------------------------------------------------|---------|-------|
| 720 | BN/0031 | BN/0031/S/11 | Federal Medical Centre            | O&G, Paediatrics, Gen. Surgery, Ophthalmology, Dentistry, Physiotherapy, Radiology, laboratory, pharmacy & internal medicine | Makurdi, Benue State                              | Makurdi | Benue |
| 721 | BN/0031 | BN/0031/S/8  | Federal Medical Centre            | O&G, Paediatrics, Gen. Surgery, Ophthalmology, Dentistry, Physiotherapy, Radiology, laboratory, pharmacy & internal medicine | Makurdi, Benue State                              | Makurdi | Benue |
| 722 | BN/0031 | BN/0031/S/2  | Federal Medical Centre            | O&G, Paediatrics, Gen. Surgery, Ophthalmology, Dentistry, Physiotherapy, Radiology, laboratory, pharmacy & internal medicine | Makurdi, Benue State                              | Makurdi | Benue |
| 723 | BN/0033 | BN/0033/S/4  | Desmon Pharmacy & Allied          | Pharmacy                                                                                                                     | Ventures 51, Railway Bye Pass, High Level Makurdi | Makurdi | Benue |
| 724 | BN/0035 | BN/0035/S/4  | Vical Pharmacy                    | Pharmacy                                                                                                                     | 6, Ali Akilu Road, Makurdi                        | Makurdi | Benue |
| 725 | BN/0039 | BN/0039/S/5  | Baz Medical Laboratory            | Laboratory                                                                                                                   | 7, Zion Street, Makurdi                           | Makurdi | Benue |
| 726 | BN/0040 | BN/0040/S/5  | Compass Medical Lab.              | Laboratory                                                                                                                   | 27, Iyochia Ayu Street, Makurdi                   | Makurdi | Benue |
| 727 | BN/0041 | BN/0041/S/7  | Hospital of Immaculate Conception | Physiotherapy, Radiology, Orthopaedic Surgery, Gen. Medicine, Gen. Surgery, Laboratory                                       | Makurdi                                           | Makurdi | Benue |
| 728 | BN/0041 | BN/0041/S/10 | Hospital of Immaculate Conception | Physiotherapy, Radiology, Orthopaedic Surgery, Gen. Medicine, Gen. Surgery, Laboratory                                       | Makurdi                                           | Makurdi | Benue |
| 729 | BN/0041 | BN/0041/S/2  | Hospital of Immaculate Conception | Physiotherapy, Radiology, Orthopaedic Surgery, Gen. Medicine, Gen. Surgery, Laboratory                                       | Makurdi                                           | Makurdi | Benue |
| 730 | BN/0041 | BN/0041/S/5  | Hospital of Immaculate Conception | Physiotherapy, Radiology, Orthopaedic Surgery, Gen. Medicine, Gen. Surgery, Laboratory                                       | Makurdi                                           | Makurdi | Benue |
| 731 | BN/0041 | BN/0041/S/11 | Hospital of Immaculate Conception | Physiotherapy, Radiology, Orthopaedic Surgery, Gen. Medicine, Gen. Surgery, Laboratory                                       | Makurdi                                           | Makurdi | Benue |
| 732 | BN/0041 | BN/0041/S/1  | Hospital of Immaculate Conception | Physiotherapy, Radiology, Orthopaedic Surgery, Gen. Medicine, Gen. Surgery, Laboratory                                       | Makurdi                                           | Makurdi | Benue |
| 733 | BN/0042 | BN/0042/S/7  | El-Shaddai Specialist Hospital    | Gen. Medicine, Radiology, O & G, Laboratory, Surgery                                                                         | Plot 2319, Kanshio, Makurdi                       | Makurdi | Benue |
| 734 | BN/0042 | BN/0042/S/1  | El-Shaddai Specialist Hospital    | Gen. Medicine, Radiology, O & G, Laboratory, Surgery                                                                         | Plot 2319, Kanshio, Makurdi                       | Makurdi | Benue |

|     |         |              |                                              |                                                                   |                                                  |         |       |
|-----|---------|--------------|----------------------------------------------|-------------------------------------------------------------------|--------------------------------------------------|---------|-------|
| 735 | BN/0042 | BN/0042/S/5  | El-Shaddai Specialist Hospital               | Gen. Medicine, Radiology, O & G, Laboratory, Surgery              | Plot 2319, Kanshio, Makurdi                      | Makurdi | Benue |
| 736 | BN/0042 | BN/0042/S/3  | El-Shaddai Specialist Hospital               | Gen. Medicine, Radiology, O & G, Laboratory, Surgery              | Plot 2319, Kanshio, Makurdi                      | Makurdi | Benue |
| 737 | BN/0044 | BN/0044/S/1  | Bishop Murrah Medical Centre                 | Gen. Medicine, Paediatrics, O & G, Surgery, Radialogy, Laboratory | Close to St. Theresa Church, High Level, Makurdi | Makurdi | Benue |
| 738 | BN/0044 | BN/0044/S/5  | Bishop Murrah Medical Centre                 | Gen. Medicine, Paediatrics, O & G, Surgery, Radialogy, Laboratory | Close to St. Theresa Church, High Level, Makurdi | Makurdi | Benue |
| 739 | BN/0044 | BN/0044/S/3  | Bishop Murrah Medical Centre                 | Gen. Medicine, Paediatrics, O & G, Surgery, Radialogy, Laboratory | Close to St. Theresa Church, High Level, Makurdi | Makurdi | Benue |
| 740 | BN/0044 | BN/0044/S/7  | Bishop Murrah Medical Centre                 | Gen. Medicine, Paediatrics, O & G, Surgery, Radialogy, Laboratory | Close to St. Theresa Church, High Level, Makurdi | Makurdi | Benue |
| 741 | BN/0045 | BN/0045/S/4  | Josac Pharm. Ltd.                            | Pharmacy                                                          | No 5, Railway By-Pass, Makurdi                   | Makurdi | Benue |
| 742 | BN/0047 | BN/0047/S/4  | Ad-tophin Pharmaceuticals Ltd.               | Pharmacy                                                          | Gboko Road, High Level, Makurdi                  | Makurdi | Benue |
| 743 | BN/0052 | BN/0052/S/3  | St. Daniel's Hospital                        |                                                                   | Behind Elipi Motor Park, Otukpo                  | Otukpo  | Benue |
| 744 | BN/0052 | BN/0052/S/2  | St. Daniel's Hospital                        |                                                                   | Behind Elipi Motor Park, Otukpo                  | Otukpo  | Benue |
| 745 | BN/0055 | BN/0055/S/2  | General Hospital,                            | Laboratory, General Surgery, Gen. Medicine, Dentistry, Pharmacy   | Otukpo                                           | Otukpo  | Benue |
| 746 | BN/0055 | BN/0055/S/1  | General Hospital,                            | Laboratory, General Surgery, Gen. Medicine, Dentistry, Pharmacy   | Otukpo                                           | Otukpo  | Benue |
| 747 | BN/0056 | BN/0056/S/4  | Mosdan Pharmacy                              | Pharmacy                                                          | Federal Road, Otukpo                             | Otukpo  | Benue |
| 748 | BN/0059 | BN/0059/S/1  | 45 Nigerian Airforce Hospital                |                                                                   | Air Force Base, Makurdi, Benue State             | Makurdi | Benue |
| 749 | BN/0059 | BN/0059/S/2  | 45 Nigerian Airforce Hospital                |                                                                   | Air Force Base, Makurdi, Benue State             | Makurdi | Benue |
| 750 | BN/0059 | BN/0059/S/8  | 45 Nigerian Airforce Hospital                |                                                                   | Air Force Base, Makurdi, Benue State             | Makurdi | Benue |
| 751 | BN/0059 | BN/0059/S/11 | 45 Nigerian Airforce Hospital                |                                                                   | Air Force Base, Makurdi, Benue State             | Makurdi | Benue |
| 752 | BN/0059 | BN/0059/S/7  | 45 Nigerian Airforce Hospital                |                                                                   | Air Force Base, Makurdi, Benue State             | Makurdi | Benue |
| 753 | BN/0059 | BN/0059/S/6  | 45 Nigerian Airforce Hospital                |                                                                   | Air Force Base, Makurdi, Benue State             | Makurdi | Benue |
| 754 | BN/0059 | BN/0059/S/5  | 45 Nigerian Airforce Hospital                |                                                                   | Air Force Base, Makurdi, Benue State             | Makurdi | Benue |
| 755 | BN/0059 | BN/0059/S/4  | 45 Nigerian Airforce Hospital                |                                                                   | Air Force Base, Makurdi, Benue State             | Makurdi | Benue |
| 756 | BN/0059 | BN/0059/S/15 | 45 Nigerian Airforce Hospital                |                                                                   | Air Force Base, Makurdi, Benue State             | Makurdi | Benue |
| 757 | BN/0059 | BN/0059/S/3  | 45 Nigerian Airforce Hospital                |                                                                   | Air Force Base, Makurdi, Benue State             | Makurdi | Benue |
| 758 | BN/0060 | BN/0060/S/4  | Federal Staff Clinic                         |                                                                   | Federal Secretariat, Makurdi, Benue State        | Makurdi | Benue |
| 759 | BN/0064 | BN/0064/S/4  | Cottage Hospital/Comprehensive Health Centre |                                                                   | Benue State Police Command, Makurdi, Benue State | Makurdi | Benue |
| 760 | BN/0064 | BN/0064/S/1  | Cottage Hospital/Comprehensive Health Centre |                                                                   | Benue State Police Command, Makurdi, Benue State | Makurdi | Benue |
| 761 | BN/0066 | BN/0066/S/5  | Benue Women Clinic                           | Primary                                                           | 35, Modern Market Rd Makurdi                     | Makurdi | Benue |
| 762 | BN/0066 | BN/0066/S/3  | Benue Women Clinic                           | Primary                                                           | 35, Modern Market Rd Makurdi                     | Makurdi | Benue |
| 763 | BN/0070 | BN/0070/S/4  | Med-Pearle Pharmacy & stores                 | Pharmacy                                                          | 54 Iyorchia Ayu Rd wurukum Makurdi               | Makurdi | Benue |
| 764 | BN/0071 | BN/0071/S/4  | Nativity Pharmacy Ltd Diocese Of Makurdi     | Pharmacy                                                          | 1 Front Of Federal Medical centre, Makurdi       | Makurdi | Benue |
| 765 | BN/0073 | BN/0073/S    | Tosem Specialist Giagnostic Laboratory       | Laboratory                                                        | 33 Old Oturkpo Rd High Level Makurdi             | Makurdi | Benue |

|     |         |              |                                               |                                                 |                                                                                             |         |       |
|-----|---------|--------------|-----------------------------------------------|-------------------------------------------------|---------------------------------------------------------------------------------------------|---------|-------|
| 766 | BN/0076 | BN/0076/S/4  | Federal Staff Clinic Makurdi                  | Pharmacy                                        | Federal Secretariat Complex Makurdi                                                         | Makurdi | Benue |
| 767 | BN/0078 | BN/0078/S    | Immanuel Medical centre/Eye Specialist Clinic | Ophthalmology                                   | 39, Modern Market Rd Makurdi                                                                | Makurdi | Benue |
| 768 | BN/0080 | BN/0080/S/4  | University of Agriculture, Makurdi            |                                                 | Makurdi, Benue State                                                                        | Makurdi | Benue |
| 769 | BN/0080 | BN/0080/S/5  | University of Agriculture, Makurdi            |                                                 | Makurdi, Benue State                                                                        | Makurdi | Benue |
| 770 | BN/0082 | BN/0082/S/9  | OK Specialist Hospital                        | Psychiatry                                      | Along Modem Market Road, Makurdi, Benue State                                               | Makurdi | Benue |
| 771 | BN/0083 | BN/0083/S/1  | Jonado Pharmacy                               | Pharmacy                                        | Km 7 Otukpo Rd Kanshio Near Seminary Makurdi                                                | Makurdi | Benue |
| 772 | BN/0102 | BN/0102/S/4  | st. Daniel's                                  | O&G,int. medicine,surgery, pharmacy, laboratory | 5, ochelifu street, behind elipi motor park, oturkpo                                        | Otukpo  | Benue |
| 773 | BN/0102 | BN/0102/S/14 | st. Daniel's                                  | O&G,int. medicine,surgery, pharmacy, laboratory | 5, ochelifu street, behind elipi motor park, oturkpo                                        | Otukpo  | Benue |
| 774 | BN/0102 | BN/0102/S/1  | st. Daniel's                                  | O&G,int. medicine,surgery, pharmacy, laboratory | 5, ochelifu street, behind elipi motor park, oturkpo                                        | Otukpo  | Benue |
| 775 | BN/0102 | BN/0102/S/7  | st. Daniel's                                  | O&G,int. medicine,surgery, pharmacy, laboratory | 5, ochelifu street, behind elipi motor park, oturkpo                                        | Otukpo  | Benue |
| 776 | BN/0102 | BN/0102/S/5  | st. Daniel's                                  | O&G,int. medicine,surgery, pharmacy, laboratory | 5, ochelifu street, behind elipi motor park, oturkpo                                        | Otukpo  | Benue |
| 777 | BN/0102 | BN/0102/S/2  | st. Daniel's                                  | O&G,int. medicine,surgery, pharmacy, laboratory | 5, ochelifu street, behind elipi motor park, oturkpo                                        | Otukpo  | Benue |
| 778 | BN/0102 | BN/0102/S/3  | st. Daniel's                                  | O&G,int. medicine,surgery, pharmacy, laboratory | 5, ochelifu street, behind elipi motor park, oturkpo                                        | Otukpo  | Benue |
| 779 | BN/0103 | BN/0103/S/4  | HAVRON PHARMACY                               | Pharmacy                                        | 116,BENU CRESCENT, WADATA, MAKURDI                                                          | Makurdi | Benue |
| 780 | BN/0106 | BN/0106/S/4  | BARNEY PHARMACY                               | PHARMACY                                        | 12 COLLEGE CRESCENT,MAKURDI                                                                 | Makurdi | Benue |
| 781 | BN/0112 | BN/0112/S/4  | Ezim Pharmacy                                 | Pharmacy                                        | 37 Jerecho Road, Oturkpo                                                                    | Otukpo  | Benue |
| 782 | BN/0122 | BN/0122/S/2  | Powaren Hospital                              |                                                 | 9, J.S. Tarka way, Gboko, Benue state                                                       | Gboko   | Benue |
| 783 | BN/0122 | BN/0122/S/10 | Powaren Hospital                              |                                                 | 9, J.S. Tarka way, Gboko, Benue state                                                       | Gboko   | Benue |
| 784 | BN/0122 | BN/0122/S/3  | Powaren Hospital                              |                                                 | 9, J.S. Tarka way, Gboko, Benue state                                                       | Gboko   | Benue |
| 785 | BN/0124 | BN/0124/S/15 | Wurukum Specialist Clinic                     |                                                 | 19, Konshisha Street, High Level, Makurdi, Benue State.                                     | Makurdi | Benue |
| 786 | BN/0127 | BN/0127/S/4  | Jaywhite Pharmacy & Stores Ltd                |                                                 | Suite A10/A11 Royal Shopping Mall, No 7 Kashim Ibrahim Road, Old GRA, Makurdi, Benue State. | Makurdi | Benue |
| 787 | BN/0129 | BN/0129/S/10 | Kings Park Polyclinic                         |                                                 | Karanga Akanya Street, Off Abu King Shuluwa Road                                            | Makurdi | Benue |
| 788 | BN/0129 | BN/0129/S/1  | Kings Park Polyclinic                         |                                                 | Karanga Akanya Street, Off Abu King Shuluwa Road                                            | Makurdi | Benue |
| 789 | BN/0132 | BN/0132/S/5  | Delight Diagnostic &Research Laboratory       |                                                 | 17, Old Otukpo Road, Makurdi, Benue State.                                                  | Otukpo  | Benue |
| 790 | BN/0133 | BN/0133/S/1  | Dora Specialist Hospital                      |                                                 | Off High Court Road, North Bank, Makurdi, Benue State.                                      | Makurdi | Benue |
| 791 | BN/0137 | BN/0137/S/4  | NKST Hospital                                 |                                                 | Mkar- Gboko , Benue State.                                                                  | Gboko   | Benue |
| 792 | BN/0137 | BN/0137/S/5  | NKST Hospital                                 |                                                 | Mkar- Gboko , Benue State.                                                                  | Gboko   | Benue |
| 793 | BN/0138 | BN/0138/S/10 | NKST Rehabilitation Hospital                  |                                                 | Mkar- Gboko , Benue State.                                                                  | Gboko   | Benue |
| 794 | BN/0138 | BN/0138/S/5  | NKST Rehabilitation Hospital                  |                                                 | Mkar- Gboko , Benue State.                                                                  | Gboko   | Benue |
| 795 | BN/0138 | BN/0138/S/11 | NKST Rehabilitation Hospital                  |                                                 | Mkar- Gboko , Benue State.                                                                  | Gboko   | Benue |
| 796 | BN/0138 | BN/0138/S/4  | NKST Rehabilitation Hospital                  |                                                 | Mkar- Gboko , Benue State.                                                                  | Gboko   | Benue |
| 797 | BN/0141 | BN/0141/S/2  | Adoose Specialist Hospital                    |                                                 | No. 12 Keghem Malu Street New GRA Makurdi Benue State.                                      | Makurdi | Benue |

|     |         |              |                                           |  |                                                              |           |       |
|-----|---------|--------------|-------------------------------------------|--|--------------------------------------------------------------|-----------|-------|
| 798 | BN/0141 | BN/0141/S/15 | Adoose Specialist Hospital                |  | No. 12 Keghem Malu Street New GRA Makurdi Benue State.       | Makurdi   | Benue |
| 799 | BN/0143 | BN/0143/S/5  | Hope Hospital.                            |  | No. 2 Akure Street Wadata, Benue State.                      | Makurdi   | Benue |
| 800 | BN/0149 | BN/0149/S/5  | General Hospital, Oju.                    |  | Secondary Health Care Facility Oju, Benue State.             | Oju       | Benue |
| 801 | BN/0149 | BN/0149/S/4  | General Hospital, Oju.                    |  | Secondary Health Care Facility Oju, Benue State.             | Oju       | Benue |
| 802 | BN/0152 | BN/0152/S/4  | Lord Is Saviour Clinic And Maternity.     |  | No. 34B Mkar Rd. Gboko, Benue State.                         | Gboko     | Benue |
| 803 | BN/0152 | BN/0152/S/5  | Lord Is Saviour Clinic And Maternity.     |  | No. 34B Mkar Rd. Gboko, Benue State.                         | Gboko     | Benue |
| 804 | BN/0152 | BN/0152/S/1  | Lord Is Saviour Clinic And Maternity.     |  | No. 34B Mkar Rd. Gboko, Benue State.                         | Gboko     | Benue |
| 805 | BN/0154 | BN/0154/S/5  | St. Vincent Hospital.                     |  | Aliade, Benue State                                          | Gwer East | Benue |
| 806 | BN/0154 | BN/0154/S/4  | St. Vincent Hospital.                     |  | Aliade, Benue State                                          | Gwer East | Benue |
| 807 | BN/0155 | BN/0155/S/1  | First Fertility Hospital Ltd.             |  | Plot BNB 5827, Behind Tile Ankpa Ward Benue State            | Makurdi   | Benue |
| 808 | BN/0155 | BN/0155/S/5  | First Fertility Hospital Ltd.             |  | Plot BNB 5827, Behind Tile Ankpa Ward Benue State            | Makurdi   | Benue |
| 809 | BN/0155 | BN/0155/S/4  | First Fertility Hospital Ltd.             |  | Plot BNB 5827, Behind Tile Ankpa Ward Benue State            | Makurdi   | Benue |
| 810 | BN/0155 | BN/0155/S/3  | First Fertility Hospital Ltd.             |  | Plot BNB 5827, Behind Tile Ankpa Ward Benue State            | Makurdi   | Benue |
| 811 | BN/0157 | BN/0157/S/4  | N K S T Hospital, Mbaakon.                |  | N K S T Hospital, Mbaakon                                    | Vandeikya | Benue |
| 812 | BN/0157 | BN/0157/S/5  | N K S T Hospital, Mbaakon.                |  | N K S T Hospital, Mbaakon                                    | Vandeikya | Benue |
| 813 | BN/0158 | BN/0158/S/1  | Myom Hospital                             |  | No. 28, General Hospital Road Gbako, Benue State             | Gboko     | Benue |
| 814 | BN/0158 | BN/0158/S/5  | Myom Hospital                             |  | No. 28, General Hospital Road Gbako, Benue State             | Gboko     | Benue |
| 815 | BN/0158 | BN/0158/S/4  | Myom Hospital                             |  | No. 28, General Hospital Road Gbako, Benue State             | Gboko     | Benue |
| 816 | BN/0158 | BN/0158/S/3  | Myom Hospital                             |  | No. 28, General Hospital Road Gbako, Benue State             | Gboko     | Benue |
| 817 | BN/0161 | BN/0161/S/4  | General Hospital, Adikpo                  |  | Kwande Benue State                                           | Kwande    | Benue |
| 818 | BN/0161 | BN/0161/S/5  | General Hospital, Adikpo                  |  | Kwande Benue State                                           | Kwande    | Benue |
| 819 | BN/0163 | BN/0163/S/10 | Benue State University Teaching Hospital. |  | BSUTH Gboko rd. Behind Tile Ankpa Ward Makurdi, Benue State. | Makurdi   | Benue |
| 820 | BN/0163 | BN/0163/S/4  | Benue State University Teaching Hospital. |  | BSUTH Gboko rd. Behind Tile Ankpa Ward Makurdi, Benue State. | Makurdi   | Benue |
| 821 | BN/0163 | BN/0163/S/5  | Benue State University Teaching Hospital. |  | BSUTH Gboko rd. Behind Tile Ankpa Ward Makurdi, Benue State. | Makurdi   | Benue |
| 822 | BN/0163 | BN/0163/S/8  | Benue State University Teaching Hospital. |  | BSUTH Gboko rd. Behind Tile Ankpa Ward Makurdi, Benue State. | Makurdi   | Benue |
| 823 | BN/0163 | BN/0163/S/12 | Benue State University Teaching Hospital. |  | BSUTH Gboko rd. Behind Tile Ankpa Ward Makurdi, Benue State. | Makurdi   | Benue |
| 824 | BN/0163 | BN/0163/S/6  | Benue State University Teaching Hospital. |  | BSUTH Gboko rd. Behind Tile Ankpa Ward Makurdi, Benue State. | Makurdi   | Benue |
| 825 | BN/0163 | BN/0163/S/15 | Benue State University Teaching Hospital. |  | BSUTH Gboko rd. Behind Tile Ankpa Ward Makurdi, Benue State. | Makurdi   | Benue |
| 826 | BN/0163 | BN/0163/S/13 | Benue State University Teaching Hospital. |  | BSUTH Gboko rd. Behind Tile Ankpa Ward Makurdi, Benue State. | Makurdi   | Benue |
| 827 | BN/0163 | BN/0163/S/11 | Benue State University Teaching Hospital. |  | BSUTH Gboko rd. Behind Tile Ankpa Ward Makurdi, Benue State. | Makurdi   | Benue |
| 828 | BN/0163 | BN/0163/S/9  | Benue State University Teaching Hospital. |  | BSUTH Gboko rd. Behind Tile Ankpa Ward Makurdi, Benue State. | Makurdi   | Benue |
| 829 | BN/0163 | BN/0163/S/14 | Benue State University Teaching Hospital. |  | BSUTH Gboko rd. Behind Tile Ankpa Ward Makurdi, Benue State. | Makurdi   | Benue |
| 830 | BN/0163 | BN/0163/S/1  | Benue State University Teaching Hospital. |  | BSUTH Gboko rd. Behind Tile Ankpa Ward Makurdi, Benue State. | Makurdi   | Benue |
| 831 | BN/0163 | BN/0163/S/2  | Benue State University Teaching Hospital. |  | BSUTH Gboko rd. Behind Tile Ankpa Ward Makurdi, Benue State. | Makurdi   | Benue |
| 832 | BN/0163 | BN/0163/S/7  | Benue State University Teaching Hospital. |  | BSUTH Gboko rd. Behind Tile Ankpa Ward Makurdi, Benue State. | Makurdi   | Benue |
| 833 | BN/0163 | BN/0163/S/3  | Benue State University Teaching Hospital. |  | BSUTH Gboko rd. Behind Tile Ankpa Ward Makurdi, Benue State. | Makurdi   | Benue |



|     |         |              |                                           |           |                                                      |                 |       |
|-----|---------|--------------|-------------------------------------------|-----------|------------------------------------------------------|-----------------|-------|
| 834 | BN/0167 | BN/0167/S/4  | St. Vincent Hospital Aliade               |           | Aliade-Otukpo Road Benue State                       | Gwer East       | Benue |
| 835 | BN/0167 | BN/0167/S/5  | St. Vincent Hospital Aliade               |           | Aliade-Otukpo Road Benue State                       | Gwer East       | Benue |
| 836 | BN/0170 | BN/0170/S/4  | General Hospital North Bank               |           | North Bank ,Markudi Benue State                      | Makurdi         | Benue |
| 837 | BN/0172 | BN/0172/S/8  | Gilead Dental Services                    | Dentistry | No.6 Kwararafa Quaters Markudi Benue State           | Makurdi         | Benue |
| 838 | BN/0174 | BN/0174/S/11 | Glory Physiotherapy                       |           | No. 27 Inikpi Street, High Level Markudi Benue State | Makurdi         | Benue |
| 839 | BN/0175 | BN/0175/S/8  | Cool Smile Dental Clinic                  |           | No.87,Ankpa Road Markudi Benue State                 | Makurdi         | Benue |
| 840 | BN/0177 | BN/0177/S/5  | Family Support Clinic                     |           | Kwararafa Quaters Markudi Benue State                | Makurdi         | Benue |
| 841 | BO/0002 | BO/0002/S/4  | General Hospital, Bama                    |           | Bama Gulumba Road, Bama Town                         | Bama            | Borno |
| 842 | BO/0002 | BO/0002/S/5  | General Hospital, Bama                    |           | Bama Gulumba Road, Bama Town                         | Bama            | Borno |
| 843 | BO/0003 | BO/0003/S/8  | General Hospital, Biu                     |           | Along Yola Road, Biu                                 | Biu             | Borno |
| 844 | BO/0003 | BO/0003/S/3  | General Hospital, Biu                     |           | Along Yola Road, Biu                                 | Biu             | Borno |
| 845 | BO/0003 | BO/0003/S/4  | General Hospital, Biu                     |           | Along Yola Road, Biu                                 | Biu             | Borno |
| 846 | BO/0003 | BO/0003/S/5  | General Hospital, Biu                     |           | Along Yola Road, Biu                                 | Biu             | Borno |
| 847 | BO/0003 | BO/0003/S/2  | General Hospital, Biu                     |           | Along Yola Road, Biu                                 | Biu             | Borno |
| 848 | BO/0003 | BO/0003/S/6  | General Hospital, Biu                     |           | Along Yola Road, Biu                                 | Biu             | Borno |
| 849 | BO/0003 | BO/0003/S/1  | General Hospital, Biu                     |           | Along Yola Road, Biu                                 | Biu             | Borno |
| 850 | BO/0005 | BO/0005/S/5  | General Hospital, Gwoza                   |           | Gwoza Town, Maiduguri                                | Gwoza           | Borno |
| 851 | BO/0005 | BO/0005/S/4  | General Hospital, Gwoza                   |           | Gwoza Town, Maiduguri                                | Gwoza           | Borno |
| 852 | BO/0005 | BO/0005/S/1  | General Hospital, Gwoza                   |           | Gwoza Town, Maiduguri                                | Gwoza           | Borno |
| 853 | BO/0005 | BO/0005/S/2  | General Hospital, Gwoza                   |           | Gwoza Town, Maiduguri                                | Gwoza           | Borno |
| 854 | BO/0007 | BO/0007/S/15 | University Of Maiduguri Teaching Hospital |           | Along Bama Rd., Maiduguri                            | Maiduguri M. C. | Borno |
| 855 | BO/0007 | BO/0007/S/6  | University Of Maiduguri Teaching Hospital |           | Along Bama Rd., Maiduguri                            | Maiduguri M. C. | Borno |
| 856 | BO/0007 | BO/0007/S/1  | University Of Maiduguri Teaching Hospital |           | Along Bama Rd., Maiduguri                            | Maiduguri M. C. | Borno |
| 857 | BO/0007 | BO/0007/S/3  | University Of Maiduguri Teaching Hospital |           | Along Bama Rd., Maiduguri                            | Maiduguri M. C. | Borno |
| 858 | BO/0007 | BO/0007/S/5  | University Of Maiduguri Teaching Hospital |           | Along Bama Rd., Maiduguri                            | Maiduguri M. C. | Borno |
| 859 | BO/0007 | BO/0007/S/2  | University Of Maiduguri Teaching Hospital |           | Along Bama Rd., Maiduguri                            | Maiduguri M. C. | Borno |
| 860 | BO/0007 | BO/0007/S/4  | University Of Maiduguri Teaching Hospital |           | Along Bama Rd., Maiduguri                            | Maiduguri M. C. | Borno |
| 861 | BO/0007 | BO/0007/S/10 | University Of Maiduguri Teaching Hospital |           | Along Bama Rd., Maiduguri                            | Maiduguri M. C. | Borno |
| 862 | BO/0007 | BO/0007/S/11 | University Of Maiduguri Teaching Hospital |           | Along Bama Rd., Maiduguri                            | Maiduguri M. C. | Borno |
| 863 | BO/0007 | BO/0007/S/7  | University Of Maiduguri Teaching Hospital |           | Along Bama Rd., Maiduguri                            | Maiduguri M. C. | Borno |
| 864 | BO/0007 | BO/0007/S/8  | University Of Maiduguri Teaching Hospital |           | Along Bama Rd., Maiduguri                            | Maiduguri M. C. | Borno |
| 865 | BO/0009 | BO/0009/S/6  | General Hospital, Kukawa                  |           | Along Kukawa-Damasak Road, Kukawa                    | Kukawa          | Borno |
| 866 | BO/0009 | BO/0009/S/2  | General Hospital, Kukawa                  |           | Along Kukawa-Damasak Road, Kukawa                    | Kukawa          | Borno |
| 867 | BO/0012 | BO/0012/S/3  | Borno Medical Clinic                      |           | No.8, Sir Kashim Ibrahim Way                         | Maiduguri M. C. | Borno |
| 868 | BO/0012 | BO/0012/S/5  | Borno Medical Clinic                      |           | No.8, Sir Kashim Ibrahim Way                         | Maiduguri M. C. | Borno |
| 869 | BO/0012 | BO/0012/S/4  | Borno Medical Clinic                      |           | No.8, Sir Kashim Ibrahim Way                         | Maiduguri M. C. | Borno |
| 870 | BO/0012 | BO/0012/S/1  | Borno Medical Clinic                      |           | No.8, Sir Kashim Ibrahim Way                         | Maiduguri M. C. | Borno |
| 871 | BO/0012 | BO/0012/S/2  | Borno Medical Clinic                      |           | No.8, Sir Kashim Ibrahim Way                         | Maiduguri M. C. | Borno |
| 872 | BO/0012 | BO/0012/S/7  | Borno Medical Clinic                      |           | No.8, Sir Kashim Ibrahim Way                         | Maiduguri M. C. | Borno |

|     |         |              |                                  |  |                                                           |                 |       |
|-----|---------|--------------|----------------------------------|--|-----------------------------------------------------------|-----------------|-------|
| 873 | BO/0014 | BO/0014/S/2  | State Specialist Hospital        |  | Along Shehu Laminu Way                                    | Maiduguri M. C. | Borno |
| 874 | BO/0014 | BO/0014/S/12 | State Specialist Hospital        |  | Along Shehu Laminu Way                                    | Maiduguri M. C. | Borno |
| 875 | BO/0014 | BO/0014/S/1  | State Specialist Hospital        |  | Along Shehu Laminu Way                                    | Maiduguri M. C. | Borno |
| 876 | BO/0014 | BO/0014/S/4  | State Specialist Hospital        |  | Along Shehu Laminu Way                                    | Maiduguri M. C. | Borno |
| 877 | BO/0014 | BO/0014/S/6  | State Specialist Hospital        |  | Along Shehu Laminu Way                                    | Maiduguri M. C. | Borno |
| 878 | BO/0014 | BO/0014/S/3  | State Specialist Hospital        |  | Along Shehu Laminu Way                                    | Maiduguri M. C. | Borno |
| 879 | BO/0014 | BO/0014/S/11 | State Specialist Hospital        |  | Along Shehu Laminu Way                                    | Maiduguri M. C. | Borno |
| 880 | BO/0014 | BO/0014/S/5  | State Specialist Hospital        |  | Along Shehu Laminu Way                                    | Maiduguri M. C. | Borno |
| 881 | BO/0015 | BO/0015/S/4  | Nursing Home, Maiduguri          |  | Behind Nhis Zonal Office, Off Shehu Laminu Way, Maiduguri | Maiduguri M. C. | Borno |
| 882 | BO/0015 | BO/0015/S/5  | Nursing Home, Maiduguri          |  | Behind Nhis Zonal Office, Off Shehu Laminu Way, Maiduguri | Maiduguri M. C. | Borno |
| 883 | BO/0016 | BO/0016/S/8  | Ayamsu Memorial Medical Centre   |  | 17 Bukar Bolori Street, Kumshe Ward Maiduguri             | Maiduguri M. C. | Borno |
| 884 | BO/0016 | BO/0016/S/5  | Ayamsu Memorial Medical Centre   |  | 17 Bukar Bolori Street, Kumshe Ward Maiduguri             | Maiduguri M. C. | Borno |
| 885 | BO/0017 | BO/0017/S/7  | Kanem Hospital & Maternity       |  | 152, Tafawa Balewa Street, Maiduguri                      | Maiduguri M. C. | Borno |
| 886 | BO/0017 | BO/0017/S/1  | Kanem Hospital & Maternity       |  | 152, Tafawa Balewa Street, Maiduguri                      | Maiduguri M. C. | Borno |
| 887 | BO/0017 | BO/0017/S/2  | Kanem Hospital & Maternity       |  | 152, Tafawa Balewa Street, Maiduguri                      | Maiduguri M. C. | Borno |
| 888 | BO/0017 | BO/0017/S/6  | Kanem Hospital & Maternity       |  | 152, Tafawa Balewa Street, Maiduguri                      | Maiduguri M. C. | Borno |
| 889 | BO/0017 | BO/0017/S/4  | Kanem Hospital & Maternity       |  | 152, Tafawa Balewa Street, Maiduguri                      | Maiduguri M. C. | Borno |
| 890 | BO/0017 | BO/0017/S/3  | Kanem Hospital & Maternity       |  | 152, Tafawa Balewa Street, Maiduguri                      | Maiduguri M. C. | Borno |
| 891 | BO/0017 | BO/0017/S/5  | Kanem Hospital & Maternity       |  | 152, Tafawa Balewa Street, Maiduguri                      | Maiduguri M. C. | Borno |
| 892 | BO/0018 | BO/0018/S/3  | Nakowa Specialist Hospital       |  | Along Govt. House Road, Maiduguri                         | Maiduguri M. C. | Borno |
| 893 | BO/0018 | BO/0018/S/7  | Nakowa Specialist Hospital       |  | Along Govt. House Road, Maiduguri                         | Maiduguri M. C. | Borno |
| 894 | BO/0018 | BO/0018/S/5  | Nakowa Specialist Hospital       |  | Along Govt. House Road, Maiduguri                         | Maiduguri M. C. | Borno |
| 895 | BO/0019 | BO/0019/S/3  | Zaman Clinic & Annex             |  | 326, Waziri Kyari Drive, Gamboru Ward, Maiduguri          | Maiduguri M. C. | Borno |
| 896 | BO/0019 | BO/0019/S/1  | Zaman Clinic & Annex             |  | 326, Waziri Kyari Drive, Gamboru Ward, Maiduguri          | Maiduguri M. C. | Borno |
| 897 | BO/0019 | BO/0019/S/2  | Zaman Clinic & Annex             |  | 326, Waziri Kyari Drive, Gamboru Ward, Maiduguri          | Maiduguri M. C. | Borno |
| 898 | BO/0019 | BO/0019/S/5  | Zaman Clinic & Annex             |  | 326, Waziri Kyari Drive, Gamboru Ward, Maiduguri          | Maiduguri M. C. | Borno |
| 899 | BO/0028 | BO/0028/S/4  | General Hospital Monguno         |  | Along Maiduguri-Baga Expressway, Maiduguri                | Monguno         | Borno |
| 900 | BO/0028 | BO/0028/S/3  | General Hospital Monguno         |  | Along Maiduguri-Baga Expressway, Maiduguri                | Monguno         | Borno |
| 901 | BO/0028 | BO/0028/S/1  | General Hospital Monguno         |  | Along Maiduguri-Baga Expressway, Maiduguri                | Monguno         | Borno |
| 902 | BO/0028 | BO/0028/S/5  | General Hospital Monguno         |  | Along Maiduguri-Baga Expressway, Maiduguri                | Monguno         | Borno |
| 903 | BO/0028 | BO/0028/S/2  | General Hospital Monguno         |  | Along Maiduguri-Baga Expressway, Maiduguri                | Monguno         | Borno |
| 904 | BO/0028 | BO/0028/S/6  | General Hospital Monguno         |  | Along Maiduguri-Baga Expressway, Maiduguri                | Monguno         | Borno |
| 905 | BO/0030 | BO/0030/S/5  | Federal Neuropsychiatry Hospital |  | Off, Baga Road, Fed. Low Cost, Maiduguri                  | Maiduguri M. C. | Borno |
| 906 | BO/0030 | BO/0030/S/4  | Federal Neuropsychiatry Hospital |  | Off, Baga Road, Fed. Low Cost, Maiduguri                  | Maiduguri M. C. | Borno |
| 907 | BO/0030 | BO/0030/S/9  | Federal Neuropsychiatry Hospital |  | Off, Baga Road, Fed. Low Cost, Maiduguri                  | Maiduguri M. C. | Borno |
| 908 | BO/0030 | BO/0030/S/7  | Federal Neuropsychiatry Hospital |  | Off, Baga Road, Fed. Low Cost, Maiduguri                  | Maiduguri M. C. | Borno |
| 909 | BO/0030 | BO/0030/S/14 | Federal Neuropsychiatry Hospital |  | Off, Baga Road, Fed. Low Cost, Maiduguri                  | Maiduguri M. C. | Borno |
| 910 | BO/0051 | BO/0051/S/7  | City Medical Centre              |  | Galadima Ward, Borno State                                | Maiduguri M. C. | Borno |
| 911 | BO/0051 | BO/0051/S/6  | City Medical Centre              |  | Galadima Ward, Borno State                                | Maiduguri M. C. | Borno |

|     |         |              |                                      |  |                                                          |                 |       |
|-----|---------|--------------|--------------------------------------|--|----------------------------------------------------------|-----------------|-------|
| 912 | BO/0051 | BO/0051/S/10 | City Medical Centre                  |  | Galadima Ward, Borno State                               | Maiduguri M. C. | Borno |
| 913 | BO/0051 | BO/0051/S/1  | City Medical Centre                  |  | Galadima Ward, Borno State                               | Maiduguri M. C. | Borno |
| 914 | BO/0051 | BO/0051/S/5  | City Medical Centre                  |  | Galadima Ward, Borno State                               | Maiduguri M. C. | Borno |
| 915 | BO/0051 | BO/0051/S/3  | City Medical Centre                  |  | Galadima Ward, Borno State                               | Maiduguri M. C. | Borno |
| 916 | BO/0062 | BO/0062/S/3  | Alkome Polyclinic                    |  | Baga Road, Maiduguri, Borno State                        | Maiduguri M. C. | Borno |
| 917 | BO/0063 | BO/0063/S/3  | Sunni Hospital                       |  | Abba Ganaram, Kashim Ibrahim Way, Maiduguri, Borno State | Maiduguri M. C. | Borno |
| 918 | BO/0063 | BO/0063/S/4  | Sunni Hospital                       |  | Abba Ganaram, Kashim Ibrahim Way, Maiduguri, Borno State | Maiduguri M. C. | Borno |
| 919 | BO/0063 | BO/0063/S/5  | Sunni Hospital                       |  | Abba Ganaram, Kashim Ibrahim Way, Maiduguri, Borno State | Maiduguri M. C. | Borno |
| 920 | BO/0065 | BO/0065/S/1  | Kwatam Medical Clinic                |  | Baga Road, Maiduguri, Borno State                        | Maiduguri M. C. | Borno |
| 921 | BO/0065 | BO/0065/S/6  | Kwatam Medical Clinic                |  | Baga Road, Maiduguri, Borno State                        | Maiduguri M. C. | Borno |
| 922 | BO/0065 | BO/0065/S/5  | Kwatam Medical Clinic                |  | Baga Road, Maiduguri, Borno State                        | Maiduguri M. C. | Borno |
| 923 | BO/0065 | BO/0065/S/3  | Kwatam Medical Clinic                |  | Baga Road, Maiduguri, Borno State                        | Maiduguri M. C. | Borno |
| 924 | BO/0065 | BO/0065/S/2  | Kwatam Medical Clinic                |  | Baga Road, Maiduguri, Borno State                        | Maiduguri M. C. | Borno |
| 925 | BO/0066 | BO/0066/S/5  | Gospel Mission to Nigeria            |  | G260 Galdimare, Biu, Gombe State                         | Biu             | Borno |
| 926 | BO/0067 | BO/0067/S/5  | Hirku Clinic & Maternity             |  | Damaturu Road, Biu, Borno State                          | Biu             | Borno |
| 927 | BO/0092 | BO/0092/S/1  | Abbott Clinic & Maternity            |  | Damaturu Road, Biu, Borno State                          | Biu             | Borno |
| 928 | BO/0092 | BO/0092/S/5  | Abbott Clinic & Maternity            |  | Damaturu Road, Biu, Borno State                          | Biu             | Borno |
| 929 | BO/0092 | BO/0092/S/7  | Abbott Clinic & Maternity            |  | Damaturu Road, Biu, Borno State                          | Biu             | Borno |
| 930 | BO/0093 | BO/0093/S/4  | University of Maiduguri Staff Clinic |  | Bama Road, Maiduguri, Borno State                        | Maiduguri M. C. | Borno |
| 931 | BO/0093 | BO/0093/S/5  | University of Maiduguri Staff Clinic |  | Bama Road, Maiduguri, Borno State                        | Maiduguri M. C. | Borno |
| 932 | BO/0095 | BO/0095/S/5  | Nig Arabic Language Village Hospital |  | Ngalla Borno                                             | Ngala           | Borno |
| 933 | BO/0095 | BO/0095/S/4  | Nig Arabic Language Village Hospital |  | Ngalla Borno                                             | Ngala           | Borno |
| 934 | BO/0113 | BO/0113/S/5  | UNITY CLINICS & MAT.                 |  | OLD GRA, NEAR GOVT HOUSE, MAIDUGURI                      | Maiduguri M. C. | Borno |
| 935 | BO/0140 | BO/0140/S/6  | Horama Hospital & Maternity          |  | Off Lagos Street, Maiduguri                              | Maiduguri M. C. | Borno |
| 936 | BO/0140 | BO/0140/S/14 | Horama Hospital & Maternity          |  | Off Lagos Street, Maiduguri                              | Maiduguri M. C. | Borno |
| 937 | BO/0140 | BO/0140/S/3  | Horama Hospital & Maternity          |  | Off Lagos Street, Maiduguri                              | Maiduguri M. C. | Borno |
| 938 | BO/0142 | BO/0142/S/1  | Royal Specialist Hospital            |  | Opp Gombole Road, Maiduguri                              | Jere            | Borno |
| 939 | BO/0142 | BO/0142/S/2  | Royal Specialist Hospital            |  | Opp Gombole Road, Maiduguri                              | Jere            | Borno |
| 940 | BO/0142 | BO/0142/S/3  | Royal Specialist Hospital            |  | Opp Gombole Road, Maiduguri                              | Jere            | Borno |
| 941 | BO/0142 | BO/0142/S/6  | Royal Specialist Hospital            |  | Opp Gombole Road, Maiduguri                              | Jere            | Borno |
| 942 | BO/0144 | BO/0144/S/3  | Mustashfa Specialist Hospital        |  | Damboa-Biu Road Behind Indimis House, Maiduguri          | Maiduguri M. C. | Borno |
| 943 | BO/0144 | BO/0144/S/7  | Mustashfa Specialist Hospital        |  | Damboa-Biu Road Behind Indimis House, Maiduguri          | Maiduguri M. C. | Borno |
| 944 | BO/0144 | BO/0144/S/2  | Mustashfa Specialist Hospital        |  | Damboa-Biu Road Behind Indimis House, Maiduguri          | Maiduguri M. C. | Borno |
| 945 | BO/0144 | BO/0144/S/1  | Mustashfa Specialist Hospital        |  | Damboa-Biu Road Behind Indimis House, Maiduguri          | Maiduguri M. C. | Borno |
| 946 | BO/0145 | BO/0145/S/8  | Amand Dental Hospital                |  | Damboa-Biu Road, Maiduguri                               | Maiduguri M. C. | Borno |
| 947 | BO/0146 | BO/0146/S/2  | Heman Hospital & Diagnostic Centre   |  | New GRA, Opp, Bama rd motor park, Maiduguri              | Maiduguri M. C. | Borno |
| 948 | BO/0146 | BO/0146/S/6  | Heman Hospital & Diagnostic Centre   |  | New GRA, Opp, Bama rd motor park, Maiduguri              | Maiduguri M. C. | Borno |
| 949 | BO/0146 | BO/0146/S/5  | Heman Hospital & Diagnostic Centre   |  | New GRA, Opp, Bama rd motor park, Maiduguri              | Maiduguri M. C. | Borno |
| 950 | BO/0146 | BO/0146/S/1  | Heman Hospital & Diagnostic Centre   |  | New GRA, Opp, Bama rd motor park, Maiduguri              | Maiduguri M. C. | Borno |
| 951 | BO/0146 | BO/0146/S/3  | Heman Hospital & Diagnostic Centre   |  | New GRA, Opp, Bama rd motor park, Maiduguri              | Maiduguri M. C. | Borno |

|     |         |              |                                                      |  |                                                                                   |                 |         |
|-----|---------|--------------|------------------------------------------------------|--|-----------------------------------------------------------------------------------|-----------------|---------|
| 952 | BO/0147 | BO/0147/S/5  | New Ultra Metropolitan Clinic & Maternity            |  | 1, Chez Coan Junction, FNPH Rd, Maiduguri                                         | Maiduguri M. C. | Borno   |
| 953 | BO/0147 | BO/0147/S/14 | New Ultra Metropolitan Clinic & Maternity            |  | 1, Chez Coan Junction, FNPH Rd, Maiduguri                                         | Maiduguri M. C. | Borno   |
| 954 | BO/0149 | BO/0149/S/11 | 7 Division Hospital                                  |  | Maimalari Military Cantonment, Maiduguri.                                         | Jere            | Borno   |
| 955 | BO/0149 | BO/0149/S/8  | 7 Division Hospital                                  |  | Maimalari Military Cantonment, Maiduguri.                                         | Jere            | Borno   |
| 956 | BO/0149 | BO/0149/S/5  | 7 Division Hospital                                  |  | Maimalari Military Cantonment, Maiduguri.                                         | Jere            | Borno   |
| 957 | BO/0149 | BO/0149/S/1  | 7 Division Hospital                                  |  | Maimalari Military Cantonment, Maiduguri.                                         | Jere            | Borno   |
| 958 | BO/0149 | BO/0149/S/10 | 7 Division Hospital                                  |  | Maimalari Military Cantonment, Maiduguri.                                         | Jere            | Borno   |
| 959 | BO/0149 | BO/0149/S/14 | 7 Division Hospital                                  |  | Maimalari Military Cantonment, Maiduguri.                                         | Jere            | Borno   |
| 960 | BO/0149 | BO/0149/S/2  | 7 Division Hospital                                  |  | Maimalari Military Cantonment, Maiduguri.                                         | Jere            | Borno   |
| 961 | BO/0149 | BO/0149/S/4  | 7 Division Hospital                                  |  | Maimalari Military Cantonment, Maiduguri.                                         | Jere            | Borno   |
| 962 | BO/0149 | BO/0149/S/7  | 7 Division Hospital                                  |  | Maimalari Military Cantonment, Maiduguri.                                         | Jere            | Borno   |
| 963 | BO/0150 | BO/0150/S/5  | Alheri Hospital                                      |  | Bolori Market Road, Maiduguri                                                     | Maiduguri M. C. | Borno   |
| 964 | BO/0151 | BO/0151/S/6  | Umar Shehu Ultramodern Hospital                      |  | Jos Road, Bulunkutu                                                               | Jere            | Borno   |
| 965 | BO/0151 | BO/0151/S/2  | Umar Shehu Ultramodern Hospital                      |  | Jos Road, Bulunkutu                                                               | Jere            | Borno   |
| 966 | BO/0151 | BO/0151/S/4  | Umar Shehu Ultramodern Hospital                      |  | Jos Road, Bulunkutu                                                               | Jere            | Borno   |
| 967 | BO/0151 | BO/0151/S/5  | Umar Shehu Ultramodern Hospital                      |  | Jos Road, Bulunkutu                                                               | Jere            | Borno   |
| 968 | BO/0151 | BO/0151/S/3  | Umar Shehu Ultramodern Hospital                      |  | Jos Road, Bulunkutu                                                               | Jere            | Borno   |
| 969 | BO/0151 | BO/0151/S/14 | Umar Shehu Ultramodern Hospital                      |  | Jos Road, Bulunkutu                                                               | Jere            | Borno   |
| 970 | BO/0151 | BO/0151/S/1  | Umar Shehu Ultramodern Hospital                      |  | Jos Road, Bulunkutu                                                               | Jere            | Borno   |
| 971 | BO/0152 | BO/0152/S/3  | Falala Specialist Medical Clinic                     |  | Mando Road, Polo GRA, Maiduguri                                                   | Maiduguri M. C. | Borno   |
| 972 | BO/0152 | BO/0152/S/1  | Falala Specialist Medical Clinic                     |  | Mando Road, Polo GRA, Maiduguri                                                   | Maiduguri M. C. | Borno   |
| 973 | BO/0154 | BO/0154/S/11 | Alpine Specialist Hospital                           |  | 10 Tafawa Street, GRA, Maiduguri                                                  | Maiduguri M. C. | Borno   |
| 974 | BO/0154 | BO/0154/S/5  | Alpine Specialist Hospital                           |  | 10 Tafawa Street, GRA, Maiduguri                                                  | Maiduguri M. C. | Borno   |
| 975 | BY/0002 | BY/0002/S/1  | Asueifa New Life Clinic                              |  | 9, Asueifa hospital street, Bay bridge, Yenizue-Gene , Yenagoa                    | Yenagoa         | Bayelsa |
| 976 | BY/0003 | BY/0003/S/1  | Kuro Specialist Hospital                             |  | 16, Otiotio road, Yenizue-Gene, Yenagoa                                           | Yenagoa         | Bayelsa |
| 977 | BY/0004 | BY/0004/S/3  | Crest Consultant Hospital and Fertility CenterClinic |  | Yenagoa                                                                           | Yenagoa         | Bayelsa |
| 978 | BY/0004 | BY/0004/S/5  | Crest Consultant Hospital and Fertility CenterClinic |  | Yenagoa                                                                           | Yenagoa         | Bayelsa |
| 979 | BY/0006 | BY/0006/S/3  | Odi General Hospital                                 |  | Odi                                                                               | Ekeremor        | Bayelsa |
| 980 | BY/0006 | BY/0006/S/2  | Odi General Hospital                                 |  | Odi                                                                               | Ekeremor        | Bayelsa |
| 981 | BY/0007 | BY/0007/S/3  | St. Peter's Hospital                                 |  | Amarata, Yenagoa                                                                  | Yenagoa         | Bayelsa |
| 982 | BY/0007 | BY/0007/S/1  | St. Peter's Hospital                                 |  | Amarata, Yenagoa                                                                  | Yenagoa         | Bayelsa |
| 983 | BY/0007 | BY/0007/S/5  | St. Peter's Hospital                                 |  | Amarata, Yenagoa                                                                  | Yenagoa         | Bayelsa |
| 984 | BY/0008 | BY/0008/S/1  | Everly Medical Centre                                |  | Yenegoa Opp. Boat Yard                                                            | Yenagoa         | Bayelsa |
| 985 | BY/0008 | BY/0008/S/3  | Everly Medical Centre                                |  | Yenegoa Opp. Boat Yard                                                            | Yenagoa         | Bayelsa |
| 986 | BY/0009 | BY/0009/S/2  | Palen Hospital                                       |  | Ekeki Yenagoa                                                                     | Yenagoa         | Bayelsa |
| 987 | BY/0009 | BY/0009/S/1  | Palen Hospital                                       |  | Ekeki Yenagoa                                                                     | Yenagoa         | Bayelsa |
| 988 | BY/0010 | BY/0010/S/2  | Mieye Medical Centre                                 |  | 630 Chief Melford Okilo Road, (Before Commisioner's Estate junction Opolo Yenagoa | Yenagoa         | Bayelsa |
| 989 | BY/0010 | BY/0010/S/1  | Mieye Medical Centre                                 |  | 630 Chief Melford Okilo Road, (Before Commisioner's Estate junction Opolo Yenagoa | Yenagoa         | Bayelsa |

|      |         |             |                                        |                                                                                                     |                                           |         |         |
|------|---------|-------------|----------------------------------------|-----------------------------------------------------------------------------------------------------|-------------------------------------------|---------|---------|
| 990  | BY/0013 | BY/0013/S/2 | New Uchenna Hospital                   |                                                                                                     | Imgbi Road Amerata<br>Yenagoa             | Yenagoa | Bayelsa |
| 991  | BY/0013 | BY/0013/S/5 | New Uchenna Hospital                   |                                                                                                     | Imgbi Road Amerata<br>Yenagoa             | Yenagoa | Bayelsa |
| 992  | BY/0021 | BY/0021/S/8 | General Hospital                       | Obst. & Gynae,<br>Internal Medicine,<br>Paediatrics,<br>General Surgery,<br>Radiology,<br>Dentistry | Okolobiri                                 | Yenagoa | Bayelsa |
| 993  | BY/0021 | BY/0021/S/1 | General Hospital                       | Obst. & Gynae,<br>Internal Medicine,<br>Paediatrics,<br>General Surgery,<br>Radiology,<br>Dentistry | Okolobiri                                 | Yenagoa | Bayelsa |
| 994  | BY/0021 | BY/0021/S/6 | General Hospital                       | Obst. & Gynae,<br>Internal Medicine,<br>Paediatrics,<br>General Surgery,<br>Radiology,<br>Dentistry | Okolobiri                                 | Yenagoa | Bayelsa |
| 995  | BY/0021 | BY/0021/S/2 | General Hospital                       | Obst. & Gynae,<br>Internal Medicine,<br>Paediatrics,<br>General Surgery,<br>Radiology,<br>Dentistry | Okolobiri                                 | Yenagoa | Bayelsa |
| 996  | BY/0021 | BY/0021/S   | General Hospital                       | Obst. & Gynae,<br>Internal Medicine,<br>Paediatrics,<br>General Surgery,<br>Radiology,<br>Dentistry | Okolobiri                                 | Yenagoa | Bayelsa |
| 997  | BY/0021 | BY/0021/S/7 | General Hospital                       | Obst. & Gynae,<br>Internal Medicine,<br>Paediatrics,<br>General Surgery,<br>Radiology,<br>Dentistry | Okolobiri                                 | Yenagoa | Bayelsa |
| 998  | BY/0022 | BY/0022/S/2 | Asueifai New Life Clinic               | General Medical<br>Practice                                                                         | Onopa, Yenagoa                            | Yenagoa | Bayelsa |
| 999  | BY/0024 | BY/0024/S/4 | Eyee Pharmacy<br>Chemist Ltd.          | Pharmacy                                                                                            | 109, Mbiama/Yenagoa Road<br>Ovom, Yenagoa | Yenagoa | Bayelsa |
| 1000 | BY/0026 | BY/0026/S/4 | Capstone Pharmacy &<br>Stores Ltd.     | Pharmacy                                                                                            | No.58 Jetty Road Yenagoa                  | Yenagoa | Bayelsa |
| 1001 | BY/0027 | BY/0027/S/4 | Mangrove Pharmacy                      | Pharmacy                                                                                            | No. 216 Mbiama Road                       | Yenagoa | Bayelsa |
| 1002 | BY/0036 | BY/0036/S/2 | Obis Clinic                            | Internal Medicine                                                                                   | Opp. Bycas, Agudama Epia,<br>Yenagoa      | Yenagoa | Bayelsa |
| 1003 | BY/0039 | BY/0039/S/5 | Glory Land Diagnostic<br>Centre        | Radiology,<br>Laboratory                                                                            | DSP Way, Yenagoa                          | Yenagoa | Bayelsa |
| 1004 | BY/0039 | BY/0039/S/7 | Glory Land Diagnostic<br>Centre        | Radiology,<br>Laboratory                                                                            | DSP Way, Yenagoa                          | Yenagoa | Bayelsa |
| 1005 | BY/0040 | BY/0040/S   | May Dental Hospital                    | Dentistry                                                                                           | Kpasia Yenagoa                            | Yenagoa | Bayelsa |
| 1006 | BY/0041 | BY/0041/S/4 | Cynflak Pharmacy<br>Chemist            | Pharmacy                                                                                            | 196 Yenagoa, Mbiama Road<br>Bayelsa       | Yenagoa | Bayelsa |
| 1007 | BY/0042 | BY/0042/S/4 | Hilek Pharmacy                         | Pharmacy                                                                                            | 3/4 Julius Berger Junction<br>Yenagoa     | Yenagoa | Bayelsa |
| 1008 | BY/0043 | BY/0043/S/4 | Efosa Pharmacy                         | Pharmacy                                                                                            | Ekeki, Yenagoa                            | Yenagoa | Bayelsa |
| 1009 | BY/0044 | BY/0044/S/4 | Jeffson Pharmacy                       | Pharmacy                                                                                            | Driefallin Road Yenagoa                   | Yenagoa | Bayelsa |
| 1010 | BY/0045 | BY/0045/S/4 | Okmoore Pharmacy                       | Pharmacy                                                                                            | Ekeki Police Station Yenagoa              | Yenagoa | Bayelsa |
| 1011 | BY/0050 | BY/0050/S   | Geotech Med.<br>Laboratory             | Laboratory                                                                                          | Yenagoa,                                  | Yenagoa | Bayelsa |
| 1012 | BY/0051 | BY/0051/S/5 | Meditech Lab.c/o<br>Solomon Chief Lab. | Laboratory                                                                                          | Federal Medical Centre<br>Yenagoa         | Yenagoa | Bayelsa |
| 1013 | BY/0053 | BY/0053/S/5 | Creda Medical<br>Laboratory            | Laboratory                                                                                          | DSP Way, Ovanal, Yenagoa                  | Yenagoa | Bayelsa |
| 1014 | BY/0057 | BY/0057/S/1 | Federal Medical<br>Centre, Yenagoa     |                                                                                                     | Yenagoa, Bayelsa State                    | Yenagoa | Bayelsa |
| 1015 | BY/0057 | BY/0057/S/3 | Federal Medical<br>Centre, Yenagoa     |                                                                                                     | Yenagoa, Bayelsa State                    | Yenagoa | Bayelsa |
| 1016 | BY/0057 | BY/0057/S/7 | Federal Medical<br>Centre, Yenagoa     |                                                                                                     | Yenagoa, Bayelsa State                    | Yenagoa | Bayelsa |
| 1017 | BY/0057 | BY/0057/S/6 | Federal Medical<br>Centre, Yenagoa     |                                                                                                     | Yenagoa, Bayelsa State                    | Yenagoa | Bayelsa |
| 1018 | BY/0057 | BY/0057/S/5 | Federal Medical<br>Centre, Yenagoa     |                                                                                                     | Yenagoa, Bayelsa State                    | Yenagoa | Bayelsa |

|      |         |              |                                          |          |                                                             |                      |             |
|------|---------|--------------|------------------------------------------|----------|-------------------------------------------------------------|----------------------|-------------|
| 1019 | BY/0057 | BY/0057/S/13 | Federal Medical Centre, Yenagoa          |          | Yenagoa, Bayelsa State                                      | Yenagoa              | Bayelsa     |
| 1020 | BY/0057 | BY/0057/S/15 | Federal Medical Centre, Yenagoa          |          | Yenagoa, Bayelsa State                                      | Yenagoa              | Bayelsa     |
| 1021 | BY/0057 | BY/0057/S/11 | Federal Medical Centre, Yenagoa          |          | Yenagoa, Bayelsa State                                      | Yenagoa              | Bayelsa     |
| 1022 | BY/0057 | BY/0057/S/8  | Federal Medical Centre, Yenagoa          |          | Yenagoa, Bayelsa State                                      | Yenagoa              | Bayelsa     |
| 1023 | BY/0057 | BY/0057/S/4  | Federal Medical Centre, Yenagoa          |          | Yenagoa, Bayelsa State                                      | Yenagoa              | Bayelsa     |
| 1024 | BY/0057 | BY/0057/S/2  | Federal Medical Centre, Yenagoa          |          | Yenagoa, Bayelsa State                                      | Yenagoa              | Bayelsa     |
| 1025 | BY/0061 | BY/0061/S/7  | Gloryland-inri med. Center               |          | 7 DSP Alameseigha Express way by Hospital Junction, Yenagoa | Yenagoa              | Bayelsa     |
| 1026 | BY/0061 | BY/0061/S/10 | Gloryland-inri med. Center               |          | 7 DSP Alameseigha Express way by Hospital Junction, Yenagoa | Yenagoa              | Bayelsa     |
| 1027 | BY/0061 | BY/0061/S/5  | Gloryland-inri med. Center               |          | 7 DSP Alameseigha Express way by Hospital Junction, Yenagoa | Yenagoa              | Bayelsa     |
| 1028 | BY/0064 | BY/0064/S/4  | Touch Good Pharmacy                      | Pharmacy | 20, Imgbi Road, Amara, Yenagoa, Bayelsa State               | Yenagoa              | Bayelsa     |
| 1029 | BY/0067 | BY/0067/S/8  | Yenogoa Hospital & Maternity             |          | Yenogoa, Bayelsa                                            | Yenagoa              | Bayelsa     |
| 1030 | BY/0067 | BY/0067/S/4  | Yenogoa Hospital & Maternity             |          | Yenogoa, Bayelsa                                            | Yenagoa              | Bayelsa     |
| 1031 | BY/0067 | BY/0067/S/7  | Yenogoa Hospital & Maternity             |          | Yenogoa, Bayelsa                                            | Yenagoa              | Bayelsa     |
| 1032 | BY/0067 | BY/0067/S/3  | Yenogoa Hospital & Maternity             |          | Yenogoa, Bayelsa                                            | Yenagoa              | Bayelsa     |
| 1033 | BY/0067 | BY/0067/S/6  | Yenogoa Hospital & Maternity             |          | Yenogoa, Bayelsa                                            | Yenagoa              | Bayelsa     |
| 1034 | BY/0067 | BY/0067/S/2  | Yenogoa Hospital & Maternity             |          | Yenogoa, Bayelsa                                            | Yenagoa              | Bayelsa     |
| 1035 | BY/0067 | BY/0067/S/5  | Yenogoa Hospital & Maternity             |          | Yenogoa, Bayelsa                                            | Yenagoa              | Bayelsa     |
| 1036 | BY/0067 | BY/0067/S/1  | Yenogoa Hospital & Maternity             |          | Yenogoa, Bayelsa                                            | Yenagoa              | Bayelsa     |
| 1037 | CR/0001 | CR/0001/S/5  | General Hospital, Mary Sclessor Avenue   |          | Mary Sclessor Avenue, Calabar                               | Calabar Municipality | Cross River |
| 1038 | CR/0001 | CR/0001/S/1  | General Hospital, Mary Sclessor Avenue   |          | Mary Sclessor Avenue, Calabar                               | Calabar Municipality | Cross River |
| 1039 | CR/0001 | CR/0001/S/4  | General Hospital, Mary Sclessor Avenue   |          | Mary Sclessor Avenue, Calabar                               | Calabar Municipality | Cross River |
| 1040 | CR/0003 | CR/0003/S/11 | Hannah Foundation Clinic & Trauma Centre |          | 13 Akim Close, Housing Estate, Calabar                      | Calabar Municipality | Cross River |
| 1041 | CR/0003 | CR/0003/S/2  | Hannah Foundation Clinic & Trauma Centre |          | 13 Akim Close, Housing Estate, Calabar                      | Calabar Municipality | Cross River |
| 1042 | CR/0003 | CR/0003/S/10 | Hannah Foundation Clinic & Trauma Centre |          | 13 Akim Close, Housing Estate, Calabar                      | Calabar Municipality | Cross River |
| 1043 | CR/0003 | CR/0003/S/1  | Hannah Foundation Clinic & Trauma Centre |          | 13 Akim Close, Housing Estate, Calabar                      | Calabar Municipality | Cross River |
| 1044 | CR/0004 | CR/0004/S/1  | Faith Foundation Specialist Clinic       |          | 57 Ndidem Isang, Isong Road, Calabar                        | Calabar Municipality | Cross River |
| 1045 | CR/0004 | CR/0004/S/6  | Faith Foundation Specialist Clinic       |          | 57 Ndidem Isang, Isong Road, Calabar                        | Calabar Municipality | Cross River |
| 1046 | CR/0004 | CR/0004/S/3  | Faith Foundation Specialist Clinic       |          | 57 Ndidem Isang, Isong Road, Calabar                        | Calabar Municipality | Cross River |
| 1047 | CR/0007 | CR/0007/S/2  | Bakor Medical Centre                     |          | 141, Ndidem Isang, Isong Road, Calabar                      | Calabar Municipality | Cross River |
| 1048 | CR/0007 | CR/0007/S/1  | Bakor Medical Centre                     |          | 141, Ndidem Isang, Isong Road, Calabar                      | Calabar Municipality | Cross River |
| 1049 | CR/0007 | CR/0007/S/5  | Bakor Medical Centre                     |          | 141, Ndidem Isang, Isong Road, Calabar                      | Calabar Municipality | Cross River |
| 1050 | CR/0007 | CR/0007/S/6  | Bakor Medical Centre                     |          | 141, Ndidem Isang, Isong Road, Calabar                      | Calabar Municipality | Cross River |
| 1051 | CR/0007 | CR/0007/S/3  | Bakor Medical Centre                     |          | 141, Ndidem Isang, Isong Road, Calabar                      | Calabar Municipality | Cross River |
| 1052 | CR/0008 | CR/0008/S/2  | Mevon Specialist Clinic                  | -        | 30 Akim Road, Calabar                                       | Calabar Municipality | Cross River |
| 1053 | CR/0008 | CR/0008/S/1  | Mevon Specialist Clinic                  | -        | 30 Akim Road, Calabar                                       | Calabar Municipality | Cross River |
| 1054 | CR/0008 | CR/0008/S/6  | Mevon Specialist Clinic                  | -        | 30 Akim Road, Calabar                                       | Calabar Municipality | Cross River |
| 1055 | CR/0008 | CR/0008/S/5  | Mevon Specialist Clinic                  | -        | 30 Akim Road, Calabar                                       | Calabar Municipality | Cross River |
| 1056 | CR/0008 | CR/0008/S/3  | Mevon Specialist Clinic                  | -        | 30 Akim Road, Calabar                                       | Calabar Municipality | Cross River |
| 1057 | CR/0012 | CR/0012/S/3  | Canaan Medical Centre                    |          | 20b Iso Oqua, Big Qua Town, Calabar                         | Calabar Municipality | Cross River |
| 1058 | CR/0020 | CR/0020/S/4  | Joel Manuel & Mayfair Pharmacy           | Pharmacy | 78 Ekpo Abasi Street, Calabar                               | Calabar South        | Cross River |

|      |         |              |                                         |            |                                                     |                      |             |
|------|---------|--------------|-----------------------------------------|------------|-----------------------------------------------------|----------------------|-------------|
| 1059 | CR/0021 | CR/0021/S/4  | Kamel Pharmacy Ltd.                     | Pharmacy   | 90b Goldie Street, Calabar                          | Calabar South        | Cross River |
| 1060 | CR/0024 | CR/0024/S/4  | Fovic Medical Diag. & Analytical Centre | Laboratory | 87, Ekpo Abasi Street, Calabar South                | Calabar South        | Cross River |
| 1061 | CR/0027 | CR/0027/S/4  | Bez Pharmacy                            | Pharmacy   | 10 White House Street, Calabar                      | Calabar South        | Cross River |
| 1062 | CR/0028 | CR/0028/S/4  | Andy Pharmacy                           | Pharmacy   | 28 Ndidem Usang Isong Road, Calabar                 | Calabar Municipality | Cross River |
| 1063 | CR/0032 | CR/0032/S/5  | Melrose Hospital                        |            | 5 Melrose Avenue (Enim Okpa) F/C. Ikom              | Ikom                 | Cross River |
| 1064 | CR/0034 | CR/0034/S/4  | Mekason Pharmacy Ltd.                   | Pharmacy   | 2 Ogoja Road, Ikom                                  | Ikom                 | Cross River |
| 1065 | CR/0038 | CR/0038/S/4  | Zodiac Pharmacy                         | Pharmacy   | 17 Okim Osabor Street, Ikom                         | Ikom                 | Cross River |
| 1066 | CR/0039 | CR/0039/S/4  | Sacred Heart Catholic Hospital          |            | Ranch Road, Obudu                                   | Obudu                | Cross River |
| 1067 | CR/0039 | CR/0039/S/5  | Sacred Heart Catholic Hospital          |            | Ranch Road, Obudu                                   | Obudu                | Cross River |
| 1068 | CR/0041 | CR/0041/S/5  | Monaiya Catholic Hospital & Maternity   |            | Igoli, Ogoja                                        | Ogoja                | Cross River |
| 1069 | CR/0041 | CR/0041/S/4  | Monaiya Catholic Hospital & Maternity   |            | Igoli, Ogoja                                        | Ogoja                | Cross River |
| 1070 | CR/0041 | CR/0041/S/7  | Monaiya Catholic Hospital & Maternity   |            | Igoli, Ogoja                                        | Ogoja                | Cross River |
| 1071 | CR/0041 | CR/0041/S/11 | Monaiya Catholic Hospital & Maternity   |            | Igoli, Ogoja                                        | Ogoja                | Cross River |
| 1072 | CR/0042 | CR/0042/S/4  | General Hospital, Igoli                 |            | Abakpa Road, Igoli, Ogoja                           | Ogoja                | Cross River |
| 1073 | CR/0042 | CR/0042/S/1  | General Hospital, Igoli                 |            | Abakpa Road, Igoli, Ogoja                           | Ogoja                | Cross River |
| 1074 | CR/0042 | CR/0042/S/5  | General Hospital, Igoli                 |            | Abakpa Road, Igoli, Ogoja                           | Ogoja                | Cross River |
| 1075 | CR/0051 | CR/0051/S/1  | County Specialist Hospital              |            | 18 Calabar Road, Ikom                               | Ikom                 | Cross River |
| 1076 | CR/0051 | CR/0051/S/5  | County Specialist Hospital              |            | 18 Calabar Road, Ikom                               | Ikom                 | Cross River |
| 1077 | CR/0051 | CR/0051/S/3  | County Specialist Hospital              |            | 18 Calabar Road, Ikom                               | Ikom                 | Cross River |
| 1078 | CR/0051 | CR/0051/S/7  | County Specialist Hospital              |            | 18 Calabar Road, Ikom                               | Ikom                 | Cross River |
| 1079 | CR/0052 | CR/0052/S/4  | Mount Zion Medical Centre               |            | 28b Yellow Duke Street, Calabar                     | Calabar Municipality | Cross River |
| 1080 | CR/0058 | CR/0058/S/11 | University of Calabar Teaching Hospital |            | Moore Road, Calabar, Cross River State.             | Calabar Municipality | Cross River |
| 1081 | CR/0058 | CR/0058/S/6  | University of Calabar Teaching Hospital |            | Moore Road, Calabar, Cross River State.             | Calabar Municipality | Cross River |
| 1082 | CR/0058 | CR/0058/S/15 | University of Calabar Teaching Hospital |            | Moore Road, Calabar, Cross River State.             | Calabar Municipality | Cross River |
| 1083 | CR/0058 | CR/0058/S/4  | University of Calabar Teaching Hospital |            | Moore Road, Calabar, Cross River State.             | Calabar Municipality | Cross River |
| 1084 | CR/0058 | CR/0058/S/5  | University of Calabar Teaching Hospital |            | Moore Road, Calabar, Cross River State.             | Calabar Municipality | Cross River |
| 1085 | CR/0058 | CR/0058/S/3  | University of Calabar Teaching Hospital |            | Moore Road, Calabar, Cross River State.             | Calabar Municipality | Cross River |
| 1086 | CR/0058 | CR/0058/S/1  | University of Calabar Teaching Hospital |            | Moore Road, Calabar, Cross River State.             | Calabar Municipality | Cross River |
| 1087 | CR/0058 | CR/0058/S/2  | University of Calabar Teaching Hospital |            | Moore Road, Calabar, Cross River State.             | Calabar Municipality | Cross River |
| 1088 | CR/0066 | CR/0066/S/4  | University of Calabar Health Centre     |            | Calabar, Cross River State                          | Calabar Municipality | Cross River |
| 1089 | CR/0066 | CR/0066/S/5  | University of Calabar Health Centre     |            | Calabar, Cross River State                          | Calabar Municipality | Cross River |
| 1090 | CR/0070 | CR/0070/S/3  | Nigerian Navy Medical Clinic            |            | 7, Club Road, Calabar, Cross River State            | Calabar Municipality | Cross River |
| 1091 | CR/0070 | CR/0070/S/5  | Nigerian Navy Medical Clinic            |            | 7, Club Road, Calabar, Cross River State            | Calabar Municipality | Cross River |
| 1092 | CR/0070 | CR/0070/S/1  | Nigerian Navy Medical Clinic            |            | 7, Club Road, Calabar, Cross River State            | Calabar Municipality | Cross River |
| 1093 | CR/0070 | CR/0070/S/4  | Nigerian Navy Medical Clinic            |            | 7, Club Road, Calabar, Cross River State            | Calabar Municipality | Cross River |
| 1094 | CR/0071 | CR/0071/S/3  | Immanuel Infirmary                      |            | No. 1 Assemblies of God Rd., Army Junction, Calabar | Calabar Municipality | Cross River |
| 1095 | CR/0072 | CR/0072/S/5  | Obudu Clinic Ltd                        |            | 105-108 Ogoja Road, Obudu, Cross River State        | Obudu                | Cross River |

|      |         |              |                                          |                                    |                                                             |                      |             |
|------|---------|--------------|------------------------------------------|------------------------------------|-------------------------------------------------------------|----------------------|-------------|
| 1096 | CR/0072 | CR/0072/S/1  | Obudu Clinic Ltd                         |                                    | 105-108 Ogoja Road, Obudu, Cross River State                | Obudu                | Cross River |
| 1097 | CR/0073 | CR/0073/S/1  | Peoples Specialist Clinic                |                                    | 48 Akim Road, Calabar                                       | Calabar Municipality | Cross River |
| 1098 | CR/0074 | CR/0074/S/1  | Bassey Enon Medical Centre               |                                    | 11B Yellow Duke Street, Calabar, C/River State              | Calabar Municipality | Cross River |
| 1099 | CR/0075 | CR/0075/S/1  | Ikpeme Medical Centre                    |                                    | 18/20 Ambo Street, Calabar, Cross River State               | Calabar Municipality | Cross River |
| 1100 | CR/0076 | CR/0076/S/3  | Victoria Itam Hospital                   |                                    | 8A Ediba Lane, Big Qua Town, Calabar, C/River State         | Calabar Municipality | Cross River |
| 1101 | CR/0076 | CR/0076/S/6  | Victoria Itam Hospital                   |                                    | 8A Ediba Lane, Big Qua Town, Calabar, C/River State         | Calabar Municipality | Cross River |
| 1102 | CR/0084 | CR/0084/S/5  | Police Clinics, Cross River              |                                    | Cross River State                                           | Calabar Municipality | Cross River |
| 1103 | CR/0084 | CR/0084/S/4  | Police Clinics, Cross River              |                                    | Cross River State                                           | Calabar Municipality | Cross River |
| 1104 | CR/0084 | CR/0084/S/1  | Police Clinics, Cross River              |                                    | Cross River State                                           | Calabar Municipality | Cross River |
| 1105 | CR/0084 | CR/0084/S/3  | Police Clinics, Cross River              |                                    | Cross River State                                           | Calabar Municipality | Cross River |
| 1106 | CR/0086 | CR/0086/S/3  | Amazing Grace Specialist Clinic          |                                    | 45, Ikot Uduak Street, Off MCC Road, Calabar, C/River State | Calabar Municipality | Cross River |
| 1107 | CR/0086 | CR/0086/S/6  | Amazing Grace Specialist Clinic          |                                    | 45, Ikot Uduak Street, Off MCC Road, Calabar, C/River State | Calabar Municipality | Cross River |
| 1108 | CR/0087 | CR/0087/S/2  | Heritage Specialist Clinic               |                                    | 64, Ekpo Abasi Street, Calabar, Cross River State           | Calabar South        | Cross River |
| 1109 | CR/0088 | CR/0088/S/1  | Testimony Medical Resource               |                                    | 58, Atakpa Street, Calabar, Cross River State               | Calabar South        | Cross River |
| 1110 | CR/0091 | CR/0091/S/5  | St. Joseph Hospital                      |                                    | Ikot Ene Ekpabuyo, Cross River State                        | Akpabuyo             | Cross River |
| 1111 | CR/0092 | CR/0092/S/5  | Comprehensive Health Centre (UCTH Annex) |                                    | Okoyong, Calabar, C/River State                             | Odukpani             | Cross River |
| 1112 | CR/0093 | CR/0093/S/5  | General Hospital Akamkpa                 |                                    | Akamkpa, C/River State                                      | Akamkpa              | Cross River |
| 1113 | CR/0094 | CR/0094/S/4  | General Hospital Ugep                    |                                    | Obol Ubi Ujong Avenue, Ugep                                 | Yakurr               | Cross River |
| 1114 | CR/0094 | CR/0094/S/5  | General Hospital Ugep                    |                                    | Obol Ubi Ujong Avenue, Ugep                                 | Yakurr               | Cross River |
| 1115 | CR/0095 | CR/0095/S/5  | General Hospital Obubra                  |                                    | Obubra, C/River State                                       | Obubra               | Cross River |
| 1116 | CR/0096 | CR/0096/S/5  | Holy Family Catholic Hospital            |                                    | Beside Holy Family Parish, Ikom, C/River State              | Ikom                 | Cross River |
| 1117 | CR/0096 | CR/0096/S/7  | Holy Family Catholic Hospital            |                                    | Beside Holy Family Parish, Ikom, C/River State              | Ikom                 | Cross River |
| 1118 | CR/0096 | CR/0096/S/4  | Holy Family Catholic Hospital            |                                    | Beside Holy Family Parish, Ikom, C/River State              | Ikom                 | Cross River |
| 1119 | CR/0098 | CR/0098/S/5  | Eja Memorial Joint Hospital              |                                    | Itigidi, Abi LGA, C/River State                             | Abi                  | Cross River |
| 1120 | CR/0099 | CR/0099/S/6  | Union Medical Centre, Calabar            |                                    | 104 Ndidem Island, Isong Road, Calabar, C/River State       | Calabar Municipality | Cross River |
| 1121 | CR/0101 | CR/0101/S/3  | Ultimate Medical & Consultant            |                                    | Plot 328 Unit B Effanga, Mkpa State Housing Estate, Calabar | Calabar Municipality | Cross River |
| 1122 | CR/0101 | CR/0101/S/8  | Ultimate Medical & Consultant            |                                    | Plot 328 Unit B Effanga, Mkpa State Housing Estate, Calabar | Calabar Municipality | Cross River |
| 1123 | CR/0101 | CR/0101/S/1  | Ultimate Medical & Consultant            |                                    | Plot 328 Unit B Effanga, Mkpa State Housing Estate, Calabar | Calabar Municipality | Cross River |
| 1124 | CR/0101 | CR/0101/S/2  | Ultimate Medical & Consultant            |                                    | Plot 328 Unit B Effanga, Mkpa State Housing Estate, Calabar | Calabar Municipality | Cross River |
| 1125 | CR/0106 | CR/0106/S/5  | Federal Psychiatric Hospital Calabar     | Laboratory, Psychiatrics, Pharmacy | Calabar, Cross River State                                  | Calabar South        | Cross River |
| 1126 | CR/0106 | CR/0106/S/4  | Federal Psychiatric Hospital Calabar     | Laboratory, Psychiatrics, Pharmacy | Calabar, Cross River State                                  | Calabar South        | Cross River |
| 1127 | CR/0106 | CR/0106/S/9  | Federal Psychiatric Hospital Calabar     | Laboratory, Psychiatrics, Pharmacy | Calabar, Cross River State                                  | Calabar South        | Cross River |
| 1128 | CR/0108 | CR/0108/S/15 | Cross River State Eye Care Programme     | Ophthalmology                      | C/o College of Health Tech. Mary Slessor Avenue, Calabar    | Calabar South        | Cross River |
| 1129 | CR/0109 | CR/0109/S/8  | Govt. Dental/Maxillofacial Centre        | Dental                             | Moore Road, Calabar                                         | Calabar South        | Cross River |



|      |         |              |                                               |                      |                                                                                             |                      |             |
|------|---------|--------------|-----------------------------------------------|----------------------|---------------------------------------------------------------------------------------------|----------------------|-------------|
| 1130 | CR/0112 | CR/0112/S/5  | Dr. Lawrence Henshaw Mem. Hospital (form IDH) | Laboratory, Pharmacy | New Ederly Road, Calabar                                                                    | Calabar South        | Cross River |
| 1131 | CR/0112 | CR/0112/S/4  | Dr. Lawrence Henshaw Mem. Hospital (form IDH) | Laboratory, Pharmacy | New Ederly Road, Calabar                                                                    | Calabar South        | Cross River |
| 1132 | CR/0140 | CR/0140/S/15 | Zerah Eye Centre                              | Ophthalmology        | 101 Ndidem Isang Isong Calabar                                                              | Calabar Municipality | Cross River |
| 1133 | CR/0143 | CR/0143/S/13 | Mego Vision Clinic                            |                      | 82, Mayne Avenue, Calabar, Cross River State.                                               | Calabar Municipality | Cross River |
| 1134 | CR/0145 | CR/0145/S/1  | Alice Effanga Okon Specialist Clinic          |                      | No.4 Ekenglwatt Street, Calabar South, Cross River State                                    | Calabar South        | Cross River |
| 1135 | CR/0149 | CR/0149/S/11 | Calabar Women and Children Hospital           |                      | 164/165 Murtala Mohammed Way Calabar                                                        | Calabar Municipality | Cross River |
| 1136 | CR/0149 | CR/0149/S/7  | Calabar Women and Children Hospital           |                      | 164/165 Murtala Mohammed Way Calabar                                                        | Calabar Municipality | Cross River |
| 1137 | CR/0149 | CR/0149/S/6  | Calabar Women and Children Hospital           |                      | 164/165 Murtala Mohammed Way Calabar                                                        | Calabar Municipality | Cross River |
| 1138 | CR/0149 | CR/0149/S/4  | Calabar Women and Children Hospital           |                      | 164/165 Murtala Mohammed Way Calabar                                                        | Calabar Municipality | Cross River |
| 1139 | CR/0149 | CR/0149/S/5  | Calabar Women and Children Hospital           |                      | 164/165 Murtala Mohammed Way Calabar                                                        | Calabar Municipality | Cross River |
| 1140 | CR/0149 | CR/0149/S/1  | Calabar Women and Children Hospital           |                      | 164/165 Murtala Mohammed Way Calabar                                                        | Calabar Municipality | Cross River |
| 1141 | CR/0149 | CR/0149/S/3  | Calabar Women and Children Hospital           |                      | 164/165 Murtala Mohammed Way Calabar                                                        | Calabar Municipality | Cross River |
| 1142 | CR/0151 | CR/0151/S/13 | Benita Eye Clinic                             |                      | 10,Mayna Avenue, Calabar Cross River State                                                  | Calabar South        | Cross River |
| 1143 | CR/0152 | CR/0152/S/6  | Luciama Memorial Specialist Hospital          |                      | No.10 Luciama Hospital Road, Off Water Intake Road-Ikot Effanga, Calabar Cross River State. | Calabar Municipality | Cross River |
| 1144 | CR/0152 | CR/0152/S/15 | Luciama Memorial Specialist Hospital          |                      | No.10 Luciama Hospital Road, Off Water Intake Road-Ikot Effanga, Calabar Cross River State. | Calabar Municipality | Cross River |
| 1145 | CR/0152 | CR/0152/S/5  | Luciama Memorial Specialist Hospital          |                      | No.10 Luciama Hospital Road, Off Water Intake Road-Ikot Effanga, Calabar Cross River State. | Calabar Municipality | Cross River |
| 1146 | CR/0152 | CR/0152/S/3  | Luciama Memorial Specialist Hospital          |                      | No.10 Luciama Hospital Road, Off Water Intake Road-Ikot Effanga, Calabar Cross River State. | Calabar Municipality | Cross River |
| 1147 | CR/0152 | CR/0152/S/1  | Luciama Memorial Specialist Hospital          |                      | No.10 Luciama Hospital Road, Off Water Intake Road-Ikot Effanga, Calabar Cross River State. | Calabar Municipality | Cross River |
| 1148 | CR/0154 | CR/0154/S/4  | Nigeria Customs Service Medical Centre        |                      | Nigeria Customs Service, Opp. Airport, Calabar Cross River State                            | Calabar Municipality | Cross River |
| 1149 | CR/0155 | CR/0155/S/5  | Bakor Hospital Ltd                            |                      | No.7,Hospital Road, Nde 3,Ikom Cross River State                                            | Ikom                 | Cross River |
| 1150 | CR/0155 | CR/0155/S/6  | Bakor Hospital Ltd                            |                      | No.7,Hospital Road, Nde 3,Ikom Cross River State                                            | Ikom                 | Cross River |
| 1151 | CR/0155 | CR/0155/S/1  | Bakor Hospital Ltd                            |                      | No.7,Hospital Road, Nde 3,Ikom Cross River State                                            | Ikom                 | Cross River |
| 1152 | CR/0155 | CR/0155/S/3  | Bakor Hospital Ltd                            |                      | No.7,Hospital Road, Nde 3,Ikom Cross River State                                            | Ikom                 | Cross River |
| 1153 | CR/0155 | CR/0155/S/2  | Bakor Hospital Ltd                            |                      | No.7,Hospital Road, Nde 3,Ikom Cross River State                                            | Ikom                 | Cross River |
| 1154 | CR/0155 | CR/0155/S/7  | Bakor Hospital Ltd                            |                      | No.7,Hospital Road, Nde 3,Ikom Cross River State                                            | Ikom                 | Cross River |
| 1155 | CR/0158 | CR/0158/S/3  | Mary Mother Of Mercy Specialist Clinic        |                      | 14, Ukpong Archibong Street, Essien Town, Calabar Cross River State.                        | Calabar Municipality | Cross River |
| 1156 | DT/0002 | DT/0002/S/1  | Good Samaritan Hospital                       |                      | 3 Good Samaritan Rd, Cable Point-Asaba                                                      | Uvwie                | Delta       |
| 1157 | DT/0005 | DT/0005/S/8  | Blue Cross Specialist Dental Clinic           | Dental               | 21, Nnebisi Road, Former NEPA Commercial office, Asaba                                      | Uvwie                | Delta       |
| 1158 | DT/0010 | DT/0010/S/5  | Reference Diagnostic Medical Lab.             | Laboratory           | 134, Nnebisi Road, Asaba                                                                    | Oshimili - South     | Delta       |
| 1159 | DT/0012 | DT/0012/S/1  | Oghor Specialist Clinic & Hospital            |                      | Izobo Street, Effurum                                                                       | Uvwie                | Delta       |
| 1160 | DT/0014 | DT/0014/S/8  | Caboc Dental Clinic                           |                      | Plot 540, 12th Ddpa, Airport Road, Effurum                                                  | Uvwie                | Delta       |
| 1161 | DT/0019 | DT/0019/S/4  | Supamed Pharmacy                              | Pharmacy             | 94, Jakpa Road, Effurum                                                                     | Uvwie                | Delta       |
| 1162 | DT/0020 | DT/0020/S/4  | Arhomed Pharm. Ltd.                           | Pharmacy             | 30A, 1st Urhusi Street Eku                                                                  | Ethiope East         | Delta       |
| 1163 | DT/0026 | DT/0026/S/4  | Hosanna Pharm. Ltd.                           | Pharmacy             | 14 Market Raod Sapele                                                                       | Sapele               | Delta       |

|      |         |              |                                      |          |                                                       |               |       |
|------|---------|--------------|--------------------------------------|----------|-------------------------------------------------------|---------------|-------|
| 1164 | DT/0027 | DT/0027/S/5  | Kwofia Clinic And Maternity          |          | 3, Kwofia Close, Po Box 35, Ovwian, Delta St.         | Udu           | Delta |
| 1165 | DT/0029 | DT/0029/S/1  | Ufor Hospital                        |          | 19, Uloho Avenue Off Isoko Rd Ughelli                 | Ughelli North | Delta |
| 1166 | DT/0029 | DT/0029/S/7  | Ufor Hospital                        |          | 19, Uloho Avenue Off Isoko Rd Ughelli                 | Ughelli North | Delta |
| 1167 | DT/0029 | DT/0029/S/5  | Ufor Hospital                        |          | 19, Uloho Avenue Off Isoko Rd Ughelli                 | Ughelli North | Delta |
| 1168 | DT/0033 | DT/0033/S/5  | Estate Specialist Hospital           |          | 47, Onofegbara Str., Polokor Market, Warri            | Warri North   | Delta |
| 1169 | DT/0033 | DT/0033/S/1  | Estate Specialist Hospital           |          | 47, Onofegbara Str., Polokor Market, Warri            | Warri North   | Delta |
| 1170 | DT/0033 | DT/0033/S/4  | Estate Specialist Hospital           |          | 47, Onofegbara Str., Polokor Market, Warri            | Warri North   | Delta |
| 1171 | DT/0039 | DT/0039/S/2  | Winrose Clinic Limited               |          | Enerhen Road, Effurun                                 | Warri North   | Delta |
| 1172 | DT/0044 | DT/0044/S/4  | Pharmserve Nig. Ltd.                 | Pharmacy | 129 Ajarnimogbo Road Warri                            | Warri South   | Delta |
| 1173 | DT/0045 | DT/0045/S/4  | Greso Pharm. Ltd.                    | Pharmacy | 27 NNPC Housing Complex Rd. Ekpan-Warri               | Uvwie         | Delta |
| 1174 | DT/0046 | DT/0046/S/4  | Rosa Mystica Pharmacy Ltd.           | Pharmacy | 110, Warri Sapele Road Warri                          | Warri South   | Delta |
| 1175 | DT/0047 | DT/0047/S/4  | SF Dimentional Services Ltd. (Pharm) | Pharmacy | 15 Robert Road Warri                                  | Warri North   | Delta |
| 1176 | DT/0048 | DT/0048/S/4  | Bowspring Industries Ltd.(Pharm)     | Pharmacy | 17, Ogonu Road Warri                                  | Warri North   | Delta |
| 1177 | DT/0049 | DT/0049/S/4  | Heritez-Nig Ltd. (Pharm)             | Pharmacy | 81, Okere Ugborikoko Road Warri                       | Warri North   | Delta |
| 1178 | DT/0050 | DT/0050/S/4  | Medvic (Nig.) Ltd. (Pharm.)          | Pharmacy | 128 Warri/Sapele Road Opp. Old Leventis Warri         | Warri South   | Delta |
| 1179 | DT/0054 | DT/0054/S/4  | Oscos Pharmacy                       | Pharmacy | No. 43, Isoko Road, Ughelli                           | Uvwie         | Delta |
| 1180 | DT/0056 | DT/0056/S/4  | Excelsior Pharmacy Ltd.              | Pharmacy | N0. 15 Emelbren Street, Off FSS Okumogba Layout Warri | Warri South   | Delta |
| 1181 | DT/0057 | DT/0057/S/4  | Keesom Pharm. & stores               | Pharmacy | No. 9 Odion Road. Warri                               | Warri South   | Delta |
| 1182 | DT/0060 | DT/0060/S/8  | Federal Medical Centre Asaba         |          | Asaba                                                 | Uvwie         | Delta |
| 1183 | DT/0060 | DT/0060/S/3  | Federal Medical Centre Asaba         |          | Asaba                                                 | Uvwie         | Delta |
| 1184 | DT/0060 | DT/0060/S/4  | Federal Medical Centre Asaba         |          | Asaba                                                 | Uvwie         | Delta |
| 1185 | DT/0060 | DT/0060/S/15 | Federal Medical Centre Asaba         |          | Asaba                                                 | Uvwie         | Delta |
| 1186 | DT/0060 | DT/0060/S/1  | Federal Medical Centre Asaba         |          | Asaba                                                 | Uvwie         | Delta |
| 1187 | DT/0060 | DT/0060/S/5  | Federal Medical Centre Asaba         |          | Asaba                                                 | Uvwie         | Delta |
| 1188 | DT/0060 | DT/0060/S/10 | Federal Medical Centre Asaba         |          | Asaba                                                 | Uvwie         | Delta |
| 1189 | DT/0060 | DT/0060/S/7  | Federal Medical Centre Asaba         |          | Asaba                                                 | Uvwie         | Delta |
| 1190 | DT/0064 | DT/0064/S/6  | Central Hospital Warri               |          | 1 Mabiaku RD NPA, Warri, Delta State                  | Warri North   | Delta |
| 1191 | DT/0064 | DT/0064/S/1  | Central Hospital Warri               |          | 1 Mabiaku RD NPA, Warri, Delta State                  | Warri North   | Delta |
| 1192 | DT/0064 | DT/0064/S/10 | Central Hospital Warri               |          | 1 Mabiaku RD NPA, Warri, Delta State                  | Warri North   | Delta |
| 1193 | DT/0064 | DT/0064/S/15 | Central Hospital Warri               |          | 1 Mabiaku RD NPA, Warri, Delta State                  | Warri North   | Delta |
| 1194 | DT/0064 | DT/0064/S/8  | Central Hospital Warri               |          | 1 Mabiaku RD NPA, Warri, Delta State                  | Warri North   | Delta |
| 1195 | DT/0064 | DT/0064/S/2  | Central Hospital Warri               |          | 1 Mabiaku RD NPA, Warri, Delta State                  | Warri North   | Delta |
| 1196 | DT/0065 | DT/0065/S/5  | Capitol Hill Clinic                  |          | 2 Omamofe Silo Str Warri                              | Warri North   | Delta |
| 1197 | DT/0065 | DT/0065/S/1  | Capitol Hill Clinic                  |          | 2 Omamofe Silo Str Warri                              | Warri North   | Delta |
| 1198 | DT/0065 | DT/0065/S/7  | Capitol Hill Clinic                  |          | 2 Omamofe Silo Str Warri                              | Warri North   | Delta |
| 1199 | DT/0066 | DT/0066/S/5  | Agbawus Medical Centre               |          | 3, Ogbo Drive, Ekurede, Warri                         | Warri North   | Delta |
| 1200 | DT/0066 | DT/0066/S/3  | Agbawus Medical Centre               |          | 3, Ogbo Drive, Ekurede, Warri                         | Warri North   | Delta |
| 1201 | DT/0070 | DT/0070/S/4  | Veenell Hospital                     |          | Okumagba Avenue, Warri                                | Warri North   | Delta |
| 1202 | DT/0070 | DT/0070/S/7  | Veenell Hospital                     |          | Okumagba Avenue, Warri                                | Warri North   | Delta |
| 1203 | DT/0073 | DT/0073/S/12 | Mass Specialist Clinic               | ENT      | No. 13 Effurun/Sapele Road Enerhen Junction, Effurun  | Uvwie         | Delta |
| 1204 | DT/0075 | DT/0075/S/4  | Mr. Anglese Hilary                   | Pharmacy | C/o Spendour Pharm. 1, Ugborikoko Road Off Airport Rd | Uvwie         | Delta |
| 1205 | DT/0077 | DT/0077/S/4  | Peter Ughwubruisi Chemists Ltd.      | Pharmacy | 43, Market Road Sapele                                | Sapele        | Delta |
| 1206 | DT/0078 | DT/0078/S/4  | Amen Pharmacy                        | Pharmacy | 8 adeola Road Ugbeiyi Sapele                          | Sapele        | Delta |

|      |         |              |                                           |          |                                                                             |               |       |
|------|---------|--------------|-------------------------------------------|----------|-----------------------------------------------------------------------------|---------------|-------|
| 1207 | DT/0080 | DT/0080/S/4  | Dubindelu Pharm. Industries Nig. Ltd.     | Pharmacy | 62, Nnebisi Road Asaba                                                      | Uvwie         | Delta |
| 1208 | DT/0084 | DT/0084/S/1  | Central Hospital Ughelli                  |          | Ughelli, Delta State                                                        | Ughelli North | Delta |
| 1209 | DT/0084 | DT/0084/S/7  | Central Hospital Ughelli                  |          | Ughelli, Delta State                                                        | Ughelli North | Delta |
| 1210 | DT/0084 | DT/0084/S/10 | Central Hospital Ughelli                  |          | Ughelli, Delta State                                                        | Ughelli North | Delta |
| 1211 | DT/0084 | DT/0084/S/8  | Central Hospital Ughelli                  |          | Ughelli, Delta State                                                        | Ughelli North | Delta |
| 1212 | DT/0085 | DT/0085/S/4  | Dieveta Pharmacy                          | Pharmacy | 50, Iwereco Road, Ughelli, Delta State                                      | Ughelli North | Delta |
| 1213 | DT/0087 | DT/0087/S/4  | Fedunique (Nig.) Ltd.                     | Pharmacy | 7, NNPC Housing Complex Rd., Edjeba, (Opp. C.O.E.), Warri.                  | Warri South   | Delta |
| 1214 | DT/0088 | DT/0088/S/11 | Humanity Hospital                         |          | No. 3 Enere Road, Warri, Delta State                                        | Warri North   | Delta |
| 1215 | DT/0088 | DT/0088/S/5  | Humanity Hospital                         |          | No. 3 Enere Road, Warri, Delta State                                        | Warri North   | Delta |
| 1216 | DT/0088 | DT/0088/S/4  | Humanity Hospital                         |          | No. 3 Enere Road, Warri, Delta State                                        | Warri North   | Delta |
| 1217 | DT/0088 | DT/0088/S/2  | Humanity Hospital                         |          | No. 3 Enere Road, Warri, Delta State                                        | Warri North   | Delta |
| 1218 | DT/0090 | DT/0090/S/12 | Westend Hospital                          |          | 2, 25th Street, Airport Road, Warri, Delta State                            | Uvwie         | Delta |
| 1219 | DT/0090 | DT/0090/S/7  | Westend Hospital                          |          | 2, 25th Street, Airport Road, Warri, Delta State                            | Uvwie         | Delta |
| 1220 | DT/0090 | DT/0090/S/5  | Westend Hospital                          |          | 2, 25th Street, Airport Road, Warri, Delta State                            | Uvwie         | Delta |
| 1221 | DT/0090 | DT/0090/S/4  | Westend Hospital                          |          | 2, 25th Street, Airport Road, Warri, Delta State                            | Uvwie         | Delta |
| 1222 | DT/0092 | DT/0092/S/3  | Ame Specialist Hospital                   |          | 15, Okumagba Avenue, Warri, Delta State                                     | Warri North   | Delta |
| 1223 | DT/0094 | DT/0094/S/11 | Navy Medical Centre                       |          | Nigerian Naval Engineering College, Naval Base, Ogorode, Sapele Delta State | Sapele        | Delta |
| 1224 | DT/0094 | DT/0094/S/4  | Navy Medical Centre                       |          | Nigerian Naval Engineering College, Naval Base, Ogorode, Sapele Delta State | Sapele        | Delta |
| 1225 | DT/0094 | DT/0094/S/8  | Navy Medical Centre                       |          | Nigerian Naval Engineering College, Naval Base, Ogorode, Sapele Delta State | Sapele        | Delta |
| 1226 | DT/0094 | DT/0094/S/7  | Navy Medical Centre                       |          | Nigerian Naval Engineering College, Naval Base, Ogorode, Sapele Delta State | Sapele        | Delta |
| 1227 | DT/0094 | DT/0094/S/3  | Navy Medical Centre                       |          | Nigerian Naval Engineering College, Naval Base, Ogorode, Sapele Delta State | Sapele        | Delta |
| 1228 | DT/0094 | DT/0094/S/2  | Navy Medical Centre                       |          | Nigerian Naval Engineering College, Naval Base, Ogorode, Sapele Delta State | Sapele        | Delta |
| 1229 | DT/0094 | DT/0094/S/1  | Navy Medical Centre                       |          | Nigerian Naval Engineering College, Naval Base, Ogorode, Sapele Delta State | Sapele        | Delta |
| 1230 | DT/0094 | DT/0094/S/5  | Navy Medical Centre                       |          | Nigerian Naval Engineering College, Naval Base, Ogorode, Sapele Delta State | Sapele        | Delta |
| 1231 | DT/0096 | DT/0096/S/5  | Ebony Clinic & Maternity                  |          | 109 Okumagba Avenue, By Ojabugbe Junction Warri, Delta State                | Warri South   | Delta |
| 1232 | DT/0098 | DT/0098/S/5  | Radio Road Clinic & Maternity             |          | 9 Radio Road, Off Lower Erejinwa Road, Warri, Delta State                   | Warri South   | Delta |
| 1233 | DT/0099 | DT/0099/S/5  | Ogana Memorial Clinic & Maternity         |          | 33, Ginuwa Road by Ogboru Junction, Delta State                             | Warri South   | Delta |
| 1234 | DT/0100 | DT/0100/S/5  | St. Georges Specialist Clinic & Maternity |          | 4, Idoma Street (Opp. Palm Grove Motel Gate), Warri, Delta State            | Warri South   | Delta |
| 1235 | DT/0101 | DT/0101/S/5  | Vertimon Medical Centre                   |          | 3 Merogun Srt, Warri, Delta State                                           | Warri South   | Delta |
| 1236 | DT/0101 | DT/0101/S/6  | Vertimon Medical Centre                   |          | 3 Merogun Srt, Warri, Delta State                                           | Warri South   | Delta |
| 1237 | DT/0101 | DT/0101/S/14 | Vertimon Medical Centre                   |          | 3 Merogun Srt, Warri, Delta State                                           | Warri South   | Delta |
| 1238 | DT/0101 | DT/0101/S/1  | Vertimon Medical Centre                   |          | 3 Merogun Srt, Warri, Delta State                                           | Warri South   | Delta |
| 1239 | DT/0103 | DT/0103/S/5  | Lily Clinic/Hospital                      |          | 6 Brisbe Street Off Deco Rd, Warri Delta                                    | Warri North   | Delta |
| 1240 | DT/0103 | DT/0103/S/7  | Lily Clinic/Hospital                      |          | 6 Brisbe Street Off Deco Rd, Warri Delta                                    | Warri North   | Delta |

|      |         |              |                                  |                      |                                                        |                  |       |
|------|---------|--------------|----------------------------------|----------------------|--------------------------------------------------------|------------------|-------|
| 1241 | DT/0103 | DT/0103/S/1  | Lily Clinic/Hospital             |                      | 6 Brisbe Street Off Deco Rd, Warri Delta               | Warri North      | Delta |
| 1242 | DT/0103 | DT/0103/S/14 | Lily Clinic/Hospital             |                      | 6 Brisbe Street Off Deco Rd, Warri Delta               | Warri North      | Delta |
| 1243 | DT/0103 | DT/0103/S/6  | Lily Clinic/Hospital             |                      | 6 Brisbe Street Off Deco Rd, Warri Delta               | Warri North      | Delta |
| 1244 | DT/0103 | DT/0103/S/4  | Lily Clinic/Hospital             |                      | 6 Brisbe Street Off Deco Rd, Warri Delta               | Warri North      | Delta |
| 1245 | DT/0103 | DT/0103/S/2  | Lily Clinic/Hospital             |                      | 6 Brisbe Street Off Deco Rd, Warri Delta               | Warri North      | Delta |
| 1246 | DT/0103 | DT/0103/S/3  | Lily Clinic/Hospital             |                      | 6 Brisbe Street Off Deco Rd, Warri Delta               | Warri North      | Delta |
| 1247 | DT/0115 | DT/0115/S/6  | GN-Children's & Gen. Med. Cli    |                      | 3, Enakeyarhe-Ukuwere Street, DDPA, Ugborikoko, Effuru | Uvwie            | Delta |
| 1248 | DT/0116 | DT/0116/S/14 | Group Christian Hospital         |                      | Inside Mosheshe Estate, off Airport Road, Effurun      | Uvwie            | Delta |
| 1249 | DT/0116 | DT/0116/S/3  | Group Christian Hospital         |                      | Inside Mosheshe Estate, off Airport Road, Effurun      | Uvwie            | Delta |
| 1250 | DT/0116 | DT/0116/S/5  | Group Christian Hospital         |                      | Inside Mosheshe Estate, off Airport Road, Effurun      | Uvwie            | Delta |
| 1251 | DT/0116 | DT/0116/S/4  | Group Christian Hospital         |                      | Inside Mosheshe Estate, off Airport Road, Effurun      | Uvwie            | Delta |
| 1252 | DT/0116 | DT/0116/S/1  | Group Christian Hospital         |                      | Inside Mosheshe Estate, off Airport Road, Effurun      | Uvwie            | Delta |
| 1253 | DT/0120 | DT/0120/S/1  | Lonia Clinic & Maternity         |                      | 143 Eket-DSC Express Way, Ovwian, Warri                | Udu              | Delta |
| 1254 | DT/0120 | DT/0120/S/6  | Lonia Clinic & Maternity         |                      | 143 Eket-DSC Express Way, Ovwian, Warri                | Udu              | Delta |
| 1255 | DT/0120 | DT/0120/S/8  | Lonia Clinic & Maternity         |                      | 143 Eket-DSC Express Way, Ovwian, Warri                | Udu              | Delta |
| 1256 | DT/0120 | DT/0120/S/7  | Lonia Clinic & Maternity         |                      | 143 Eket-DSC Express Way, Ovwian, Warri                | Udu              | Delta |
| 1257 | DT/0120 | DT/0120/S/10 | Lonia Clinic & Maternity         |                      | 143 Eket-DSC Express Way, Ovwian, Warri                | Udu              | Delta |
| 1258 | DT/0120 | DT/0120/S/15 | Lonia Clinic & Maternity         |                      | 143 Eket-DSC Express Way, Ovwian, Warri                | Udu              | Delta |
| 1259 | DT/0120 | DT/0120/S/2  | Lonia Clinic & Maternity         |                      | 143 Eket-DSC Express Way, Ovwian, Warri                | Udu              | Delta |
| 1260 | DT/0120 | DT/0120/S/3  | Lonia Clinic & Maternity         |                      | 143 Eket-DSC Express Way, Ovwian, Warri                | Udu              | Delta |
| 1261 | DT/0120 | DT/0120/S/5  | Lonia Clinic & Maternity         |                      | 143 Eket-DSC Express Way, Ovwian, Warri                | Udu              | Delta |
| 1262 | DT/0125 | DT/0125/S/2  | Regal Clinic & Maternity         |                      | 226, Jakpa Road, Effurun, Delta State                  | Uvwie            | Delta |
| 1263 | DT/0125 | DT/0125/S/3  | Regal Clinic & Maternity         |                      | 226, Jakpa Road, Effurun, Delta State                  | Uvwie            | Delta |
| 1264 | DT/0125 | DT/0125/S/14 | Regal Clinic & Maternity         |                      | 226, Jakpa Road, Effurun, Delta State                  | Uvwie            | Delta |
| 1265 | DT/0125 | DT/0125/S/5  | Regal Clinic & Maternity         |                      | 226, Jakpa Road, Effurun, Delta State                  | Uvwie            | Delta |
| 1266 | DT/0125 | DT/0125/S/1  | Regal Clinic & Maternity         |                      | 226, Jakpa Road, Effurun, Delta State                  | Uvwie            | Delta |
| 1267 | DT/0129 | DT/0129/S/5  | St. Joseph Catholic Hospital     |                      | 142, Nnebisi Road, Delta                               | Oshimili - South | Delta |
| 1268 | DT/0130 | DT/0130/S/3  | St. Louis Clinic                 |                      | 4, Okundolor Street, off Ogbunu Road, Warri            | Warri South      | Delta |
| 1269 | DT/0131 | DT/0131/S/5  | Obule Medical Centre             |                      | 115, Okpe Road, Sapele                                 | Sapele           | Delta |
| 1270 | DT/0131 | DT/0131/S/1  | Obule Medical Centre             |                      | 115, Okpe Road, Sapele                                 | Sapele           | Delta |
| 1271 | DT/0140 | DT/0140/S/5  | Medichem Laboratories            | Laboratory           | 1, Ejemudario Street, Warri, Delta State               | Warri South      | Delta |
| 1272 | DT/0141 | DT/0141/S/4  | Holymarks Pharmacy               | Pharmacy             | 3, Ajomo Avenue, Delta State                           | Uvwie            | Delta |
| 1273 | DT/0149 | DT/0149/S/5  | B.U.Clinics & Hospital LTD       |                      | 26 Kotie Street, Warri                                 | Warri South      | Delta |
| 1274 | DT/0149 | DT/0149/S/3  | B.U.Clinics & Hospital LTD       |                      | 26 Kotie Street, Warri                                 | Warri South      | Delta |
| 1275 | DT/0149 | DT/0149/S/6  | B.U.Clinics & Hospital LTD       |                      | 26 Kotie Street, Warri                                 | Warri South      | Delta |
| 1276 | DT/0149 | DT/0149/S/2  | B.U.Clinics & Hospital LTD       |                      | 26 Kotie Street, Warri                                 | Warri South      | Delta |
| 1277 | DT/0149 | DT/0149/S/10 | B.U.Clinics & Hospital LTD       |                      | 26 Kotie Street, Warri                                 | Warri South      | Delta |
| 1278 | DT/0151 | DT/0151/S/1  | St Rebecca's Specialist Hospital | Surgery              | 11 Federal College of Education Technical Road Asaba   | Uvwie            | Delta |
| 1279 | DT/0152 | DT/0152/S/5  | Assumption Clinic & Maternity    |                      | 8 Idiaregbe Street, Okumagba Layout, PO Box 137, Warri | Warri South      | Delta |
| 1280 | DT/0152 | DT/0152/S/3  | Assumption Clinic & Maternity    |                      | 8 Idiaregbe Street, Okumagba Layout, PO Box 137, Warri | Warri South      | Delta |
| 1281 | DT/0156 | DT/0156/S/1  | Syracuse Clinic                  | General Surgery      | 12, Willie Street off Deco Road, Warri                 | Warri North      | Delta |
| 1282 | DT/0160 | DT/0160/S/3  | Goshen Medical Centre, Asaba     | O&G, General Surgery | 8 Agu Road, Umuagu, Asaba                              | Oshimili - South | Delta |
| 1283 | DT/0160 | DT/0160/S/1  | Goshen Medical Centre, Asaba     | O&G, General Surgery | 8 Agu Road, Umuagu, Asaba                              | Oshimili - South | Delta |

|      |         |              |                                                |  |                                                                                                          |                  |       |
|------|---------|--------------|------------------------------------------------|--|----------------------------------------------------------------------------------------------------------|------------------|-------|
| 1284 | DT/0162 | DT/0162/S/13 | Hellyncom Eye Clinic                           |  | 285 Warri/Sapele Road by First Marine Gate, Warri                                                        | Uvwie            | Delta |
| 1285 | DT/0163 | DT/0163/S/5  | Shekinah Medical Centre Limited                |  | Opp. Heros Of Faith Church, Aro Rd Off Ughelli-Patani RD, Ughelli, Delta state                           | Ughelli North    | Delta |
| 1286 | DT/0163 | DT/0163/S/3  | Shekinah Medical Centre Limited                |  | Opp. Heros Of Faith Church, Aro Rd Off Ughelli-Patani RD, Ughelli, Delta state                           | Ughelli North    | Delta |
| 1287 | DT/0165 | DT/0165/S/3  | Island Clinic & Maternity                      |  | 100,Okere Ugborkoko Road, Okumagba Layout ,Warri, Delta State                                            | Uvwie            | Delta |
| 1288 | DT/0166 | DT/0166/S/15 | Okparavero Memorial Hospital                   |  | No 159,Sapele rd, Okirighwre, Sapele, Delta State                                                        | Sapele           | Delta |
| 1289 | DT/0166 | DT/0166/S/3  | Okparavero Memorial Hospital                   |  | No 159,Sapele rd, Okirighwre, Sapele, Delta State                                                        | Sapele           | Delta |
| 1290 | DT/0166 | DT/0166/S/10 | Okparavero Memorial Hospital                   |  | No 159,Sapele rd, Okirighwre, Sapele, Delta State                                                        | Sapele           | Delta |
| 1291 | DT/0166 | DT/0166/S/6  | Okparavero Memorial Hospital                   |  | No 159,Sapele rd, Okirighwre, Sapele, Delta State                                                        | Sapele           | Delta |
| 1292 | DT/0166 | DT/0166/S/5  | Okparavero Memorial Hospital                   |  | No 159,Sapele rd, Okirighwre, Sapele, Delta State                                                        | Sapele           | Delta |
| 1293 | DT/0167 | DT/0167/S/1  | First-Rank Hospital LTD                        |  | 27,Ejewor Street, Behind Gateway To Heaven Ministry 24/26 Arubaye St.Okumagba Layout, Warri, Delta State | Warri South      | Delta |
| 1294 | DT/0168 | DT/0168/S/3  | Shepherd Hospital And Fertility Center         |  | 100B Edjeba RD, Warri, Delta State                                                                       | Warri South      | Delta |
| 1295 | DT/0168 | DT/0168/S/7  | Shepherd Hospital And Fertility Center         |  | 100B Edjeba RD, Warri, Delta State                                                                       | Warri South      | Delta |
| 1296 | DT/0169 | DT/0169/S/1  | Rapha Specialist Children and General Hospital |  |                                                                                                          | Warri North      | Delta |
| 1297 | DT/0169 | DT/0169/S/6  | Rapha Specialist Children and General Hospital |  |                                                                                                          | Warri North      | Delta |
| 1298 | DT/0169 | DT/0169/S/10 | Rapha Specialist Children and General Hospital |  |                                                                                                          | Warri North      | Delta |
| 1299 | DT/0170 | DT/0170/S/5  | St. Andrew`s Hospital                          |  | 39,Robert Road, Warri Delta State                                                                        | Warri South      | Delta |
| 1300 | DT/0173 | DT/0173/S/13 | Aubaine Eye Care Inc.                          |  | 24 Airport RD, White Idegbe Estate, Ugborikoko, Effurun, Warri, Delta State                              | Uvwie            | Delta |
| 1301 | DT/0187 | DT/0187/S/11 | Humanity Hospital                              |  | 3 Humanity Hospital Close Off Enerhen Road, Effurun Delta State                                          | Ughelli North    | Delta |
| 1302 | DT/0188 | DT/0188/S/4  | Concord-Bay Pharmacy                           |  | 173, Effurun/Sapele Road, Warri, Delta State                                                             | Uvwie            | Delta |
| 1303 | DT/0192 | DT/0192/S/15 | El-Shaddai Specialist Eye Hospital             |  | 6 Ebebuwa Street, Asaba. Delta State                                                                     | Oshimili - South | Delta |
| 1304 | DT/0198 | DT/0198/S/13 | Isoks Vision Limited                           |  | N Stateo 3, Dennis Osadebe RD, Asaba Delta                                                               | Oshimili - North | Delta |
| 1305 | DT/0201 | DT/0201/S/8  | St. Luke Hospital Asaba                        |  | Opp Delta Broadcasting Office Asaba, Delta State                                                         | Oshimili - South | Delta |
| 1306 | DT/0201 | DT/0201/S/1  | St. Luke Hospital Asaba                        |  | Opp Delta Broadcasting Office Asaba, Delta State                                                         | Oshimili - South | Delta |
| 1307 | DT/0201 | DT/0201/S/2  | St. Luke Hospital Asaba                        |  | Opp Delta Broadcasting Office Asaba, Delta State                                                         | Oshimili - South | Delta |
| 1308 | DT/0201 | DT/0201/S/5  | St. Luke Hospital Asaba                        |  | Opp Delta Broadcasting Office Asaba, Delta State                                                         | Oshimili - South | Delta |
| 1309 | DT/0201 | DT/0201/S/7  | St. Luke Hospital Asaba                        |  | Opp Delta Broadcasting Office Asaba, Delta State                                                         | Oshimili - South | Delta |
| 1310 | DT/0201 | DT/0201/S/4  | St. Luke Hospital Asaba                        |  | Opp Delta Broadcasting Office Asaba, Delta State                                                         | Oshimili - South | Delta |
| 1311 | DT/0201 | DT/0201/S/3  | St. Luke Hospital Asaba                        |  | Opp Delta Broadcasting Office Asaba, Delta State                                                         | Oshimili - South | Delta |
| 1312 | DT/0203 | DT/0203/S/2  | Lana Hospital                                  |  | 48, Atufe Road, Off Oke Road, Sapele Delta State.                                                        | Sapele           | Delta |
| 1313 | DT/0204 | DT/0204/S/13 | Simply Vision Express Ltd                      |  | 7. Anwai Road, Asaba, Delta State.                                                                       | Aniocha - South  | Delta |
| 1314 | DT/0206 | DT/0206/S/8  | AUV5 Dental Clinic                             |  | 2, Mmemli Onya Street, Off Jarret Street, Asaba, Delta State                                             | Aniocha North    | Delta |
| 1315 | DT/0207 | DT/0207/S/3  | Shabach Hospitals Ltd                          |  | 200 PTI Road, By Sunny Eru Motors, Effurun, Delta State                                                  | Warri North      | Delta |
| 1316 | DT/0207 | DT/0207/S/1  | Shabach Hospitals Ltd                          |  | 200 PTI Road, By Sunny Eru Motors, Effurun, Delta State                                                  | Warri North      | Delta |

|      |         |              |                                                         |                                                            |                                                           |                 |        |
|------|---------|--------------|---------------------------------------------------------|------------------------------------------------------------|-----------------------------------------------------------|-----------------|--------|
| 1317 | DT/0208 | DT/0208/S/11 | Twin City Hospital & Diagnostic Centre                  |                                                            | 99, Osadebey Way, Asaba Delta State                       | Aniocha - South | Delta  |
| 1318 | DT/0208 | DT/0208/S/5  | Twin City Hospital & Diagnostic Centre                  |                                                            | 99, Osadebey Way, Asaba Delta State                       | Aniocha - South | Delta  |
| 1319 | DT/0208 | DT/0208/S/1  | Twin City Hospital & Diagnostic Centre                  |                                                            | 99, Osadebey Way, Asaba Delta State                       | Aniocha - South | Delta  |
| 1320 | DT/0208 | DT/0208/S/2  | Twin City Hospital & Diagnostic Centre                  |                                                            | 99, Osadebey Way, Asaba Delta State                       | Aniocha - South | Delta  |
| 1321 | DT/0210 | DT/0210/S/3  | Kenet Group Medical Services                            |                                                            | 14, Nwaezeapu Street, Off Nnebisi Road, Asaba Delta State | Aniocha - South | Delta  |
| 1322 | DT/0210 | DT/0210/S/1  | Kenet Group Medical Services                            |                                                            | 14, Nwaezeapu Street, Off Nnebisi Road, Asaba Delta State | Aniocha - South | Delta  |
| 1323 | DT/0210 | DT/0210/S/6  | Kenet Group Medical Services                            |                                                            | 14, Nwaezeapu Street, Off Nnebisi Road, Asaba Delta State | Aniocha - South | Delta  |
| 1324 | EB/0004 | EB/0004/S/1  | Christ The King Hospital                                |                                                            | 85, Afikpo Road, Abakaliki                                | Abakaliki       | Ebonyi |
| 1325 | EB/0007 | EB/0007/S/6  | Federal Teaching Hospital, Abakaliki                    |                                                            | Opposite Police Barracks                                  | Abakaliki       | Ebonyi |
| 1326 | EB/0007 | EB/0007/S/1  | Federal Teaching Hospital, Abakaliki                    |                                                            | Opposite Police Barracks                                  | Abakaliki       | Ebonyi |
| 1327 | EB/0007 | EB/0007/S/3  | Federal Teaching Hospital, Abakaliki                    |                                                            | Opposite Police Barracks                                  | Abakaliki       | Ebonyi |
| 1328 | EB/0007 | EB/0007/S/2  | Federal Teaching Hospital, Abakaliki                    |                                                            | Opposite Police Barracks                                  | Abakaliki       | Ebonyi |
| 1329 | EB/0007 | EB/0007/S/5  | Federal Teaching Hospital, Abakaliki                    |                                                            | Opposite Police Barracks                                  | Abakaliki       | Ebonyi |
| 1330 | EB/0007 | EB/0007/S/7  | Federal Teaching Hospital, Abakaliki                    |                                                            | Opposite Police Barracks                                  | Abakaliki       | Ebonyi |
| 1331 | EB/0007 | EB/0007/S/4  | Federal Teaching Hospital, Abakaliki                    |                                                            | Opposite Police Barracks                                  | Abakaliki       | Ebonyi |
| 1332 | EB/0017 | EB/0017/S/15 | Niger Optical Center                                    | Ophthalmology                                              | Abakaliki                                                 | Abakaliki       | Ebonyi |
| 1333 | EB/0020 | EB/0020/S/4  | Ekoh Drugs Co. Ltd.                                     | Pharmacy                                                   | 4B Ogoja Rd Abakaliki                                     | Abakaliki       | Ebonyi |
| 1334 | EB/0021 | EB/0021/S/4  | Ceno Pharmacy                                           | Pharmacy                                                   | 5 Zik Avenue Abakaliki                                    | Abakaliki       | Ebonyi |
| 1335 | EB/0022 | EB/0022/S/4  | Sun Pharmacy                                            | Pharmacy                                                   | 23 Afikpo St. Abakaliki                                   | Abakaliki       | Ebonyi |
| 1336 | EB/0023 | EB/0023/S/4  | Godal Pharmacy                                          | Pharmacy                                                   | Off Water Works Rd, Abakaliki                             | Aba North       | Abia   |
| 1337 | EB/0024 | EB/0024/S/5  | Asia Specialist Laboratory                              | Laboratory                                                 | 4C Ogoja Rd., Abakaliki                                   | Abakaliki       | Ebonyi |
| 1338 | EB/0025 | EB/0025/S/5  | Eston Medical Laboratory                                | Laboratory                                                 | 12 Gunny Rd., Abakaliki                                   | Aba North       | Abia   |
| 1339 | EB/0029 | EB/0029/S/4  | New Good Health Pharmacy                                | Pharmacy                                                   | Eke Market Rd. Afikpo                                     | Afikpo North    | Ebonyi |
| 1340 | EB/0031 | EB/0031/S/2  | General Hospital                                        | Gen. med., Gen. surgery, Paediatrics, Pharmacy, Laboratory | Ezzamgbo                                                  | Ohaukwu         | Ebonyi |
| 1341 | EB/0031 | EB/0031/S/6  | General Hospital                                        | Gen. med., Gen. surgery, Paediatrics, Pharmacy, Laboratory | Ezzamgbo                                                  | Ohaukwu         | Ebonyi |
| 1342 | EB/0031 | EB/0031/S/4  | General Hospital                                        | Gen. med., Gen. surgery, Paediatrics, Pharmacy, Laboratory | Ezzamgbo                                                  | Ohaukwu         | Ebonyi |
| 1343 | EB/0031 | EB/0031/S/5  | General Hospital                                        | Gen. med., Gen. surgery, Paediatrics, Pharmacy, Laboratory | Ezzamgbo                                                  | Ohaukwu         | Ebonyi |
| 1344 | EB/0031 | EB/0031/S/1  | General Hospital                                        | Gen. med., Gen. surgery, Paediatrics, Pharmacy, Laboratory | Ezzamgbo                                                  | Ohaukwu         | Ebonyi |
| 1345 | EB/0041 | EB/0041/S/4  | Bishan Pharmacy                                         | Pharmacy                                                   | 1A Water Works Road, Abakaliki, Ebonyi State              | Abakaliki       | Ebonyi |
| 1346 | EB/0043 | EB/0043/S/5  | Medical Centre Akanu Ibiyam Federal Polytechnic, Unwana |                                                            | Ibeyi, Ebonyi State                                       | Afikpo South    | Ebonyi |
| 1347 | EB/0043 | EB/0043/S/4  | Medical Centre Akanu Ibiyam Federal Polytechnic, Unwana |                                                            | Ibeyi, Ebonyi State                                       | Afikpo South    | Ebonyi |
| 1348 | EB/0047 | EB/0047/S/4  | Alcord Pharmacy                                         | Pharmacy                                                   | 29, Akinkenwa, Abakaliki                                  | Abakaliki       | Ebonyi |
| 1349 | EB/0049 | EB/0049/S/4  | GABIO PHARMACY                                          | Pharmacy                                                   | 9, OBIRI, ABAKALIKI                                       | Abakaliki       | Ebonyi |
| 1350 | EB/0050 | EB/0050/S/4  | Elka Pharmacy Co Nig Ltd                                | Pharmacy                                                   | 19 Brakembry/ Lagos Street, Abakaliki                     | Abakaliki       | Ebonyi |
| 1351 | EB/0056 | EB/0056/S/1  | Mater Misericordiae Hospital                            |                                                            | Afikpo North LGA                                          | Afikpo North    | Ebonyi |
| 1352 | EB/0056 | EB/0056/S/2  | Mater Misericordiae Hospital                            |                                                            | Afikpo North LGA                                          | Afikpo North    | Ebonyi |
| 1353 | EB/0056 | EB/0056/S/3  | Mater Misericordiae Hospital                            |                                                            | Afikpo North LGA                                          | Afikpo North    | Ebonyi |

|      |         |              |                                 |                      |                                       |                 |        |
|------|---------|--------------|---------------------------------|----------------------|---------------------------------------|-----------------|--------|
| 1354 | EB/0056 | EB/0056/S/6  | Mater Misericordiae Hospital    |                      | Afikpo North LGA                      | Afikpo North    | Ebonyi |
| 1355 | EB/0056 | EB/0056/S/4  | Mater Misericordiae Hospital    |                      | Afikpo North LGA                      | Afikpo North    | Ebonyi |
| 1356 | EB/0056 | EB/0056/S/5  | Mater Misericordiae Hospital    |                      | Afikpo North LGA                      | Afikpo North    | Ebonyi |
| 1357 | EB/0056 | EB/0056/S/10 | Mater Misericordiae Hospital    |                      | Afikpo North LGA                      | Afikpo North    | Ebonyi |
| 1358 | EB/0057 | EB/0057/S/4  | New Good Health Pharmacy        |                      | 1, Amachi Road, Afikpo, Ebonyi State  | Afikpo South    | Ebonyi |
| 1359 | EB/0059 | EB/0059/S/7  | Mater Misericordia              |                      | Afikpo Ebonyi State                   | Afikpo North    | Ebonyi |
| 1360 | EB/0060 | EB/0060/S/1  | El- Shaddai Specialist Hospital |                      | 44 Ogoja Rd. Abakaliki, Ebonyi State. | Abakaliki       | Ebonyi |
| 1361 | EB/0063 | EB/0063/S/4  | Midtown Pharmacy                |                      | 13 Zik Avenue Abakaliki               | Abakaliki       | Ebonyi |
| 1362 | ED/0001 | ED/0001/S/4  | General Hospital, Afuze         |                      | Afuze                                 | Esan West       | Edo    |
| 1363 | ED/0001 | ED/0001/S/5  | General Hospital, Afuze         |                      | Afuze                                 | Esan West       | Edo    |
| 1364 | ED/0002 | ED/0002/S/2  | General Hospital, Igarra        |                      | Igarra, Akoko-Edo                     | Akoko Edo       | Edo    |
| 1365 | ED/0002 | ED/0002/S/4  | General Hospital, Igarra        |                      | Igarra, Akoko-Edo                     | Akoko Edo       | Edo    |
| 1366 | ED/0002 | ED/0002/S/1  | General Hospital, Igarra        |                      | Igarra, Akoko-Edo                     | Akoko Edo       | Edo    |
| 1367 | ED/0002 | ED/0002/S/5  | General Hospital, Igarra        |                      | Igarra, Akoko-Edo                     | Akoko Edo       | Edo    |
| 1368 | ED/0002 | ED/0002/S/6  | General Hospital, Igarra        |                      | Igarra, Akoko-Edo                     | Akoko Edo       | Edo    |
| 1369 | ED/0002 | ED/0002/S/3  | General Hospital, Igarra        |                      | Igarra, Akoko-Edo                     | Akoko Edo       | Edo    |
| 1370 | ED/0003 | ED/0003/S/5  | Government Hospital             |                      | Ibillo                                | Akoko Edo       | Edo    |
| 1371 | ED/0003 | ED/0003/S/4  | Government Hospital             |                      | Ibillo                                | Akoko Edo       | Edo    |
| 1372 | ED/0004 | ED/0004/S/2  | District Hospital, Akoko Edo    |                      | Uneme-Osu                             | Akoko Edo       | Edo    |
| 1373 | ED/0004 | ED/0004/S/1  | District Hospital, Akoko Edo    |                      | Uneme-Osu                             | Akoko Edo       | Edo    |
| 1374 | ED/0009 | ED/0009/S/9  | Psychiatric Hospital            |                      | Uselu                                 | Egor            | Edo    |
| 1375 | ED/0009 | ED/0009/S/2  | Psychiatric Hospital            |                      | Uselu                                 | Egor            | Edo    |
| 1376 | ED/0009 | ED/0009/S/1  | Psychiatric Hospital            |                      | Uselu                                 | Egor            | Edo    |
| 1377 | ED/0011 | ED/0011/S/1  | Mount Gilead Hospital           |                      | Off Uselu, Lagos Road, Benin City     | Egor            | Edo    |
| 1378 | ED/0011 | ED/0011/S/6  | Mount Gilead Hospital           |                      | Off Uselu, Lagos Road, Benin City     | Egor            | Edo    |
| 1379 | ED/0011 | ED/0011/S/5  | Mount Gilead Hospital           |                      | Off Uselu, Lagos Road, Benin City     | Egor            | Edo    |
| 1380 | ED/0011 | ED/0011/S/2  | Mount Gilead Hospital           |                      | Off Uselu, Lagos Road, Benin City     | Egor            | Edo    |
| 1381 | ED/0011 | ED/0011/S/11 | Mount Gilead Hospital           |                      | Off Uselu, Lagos Road, Benin City     | Egor            | Edo    |
| 1382 | ED/0011 | ED/0011/S/4  | Mount Gilead Hospital           |                      | Off Uselu, Lagos Road, Benin City     | Egor            | Edo    |
| 1383 | ED/0011 | ED/0011/S/3  | Mount Gilead Hospital           |                      | Off Uselu, Lagos Road, Benin City     | Egor            | Edo    |
| 1384 | ED/0013 | ED/0013/S    | St. Mary Hospital               | Pharmacy, Laboratory | 62 Textile Mill Road                  | Egor            | Edo    |
| 1385 | ED/0013 | ED/0013/S/5  | St. Mary Hospital               | Pharmacy, Laboratory | 62 Textile Mill Road                  | Egor            | Edo    |
| 1386 | ED/0015 | ED/0015/S/2  | District Hospital, Irrua        |                      | Usugbenu-Irrua                        | Esan Central    | Edo    |
| 1387 | ED/0016 | ED/0016/S/11 | Irrua Specialist Hospital       |                      | Irrua                                 | Esan Central    | Edo    |
| 1388 | ED/0016 | ED/0016/S/6  | Irrua Specialist Hospital       |                      | Irrua                                 | Esan Central    | Edo    |
| 1389 | ED/0016 | ED/0016/S/8  | Irrua Specialist Hospital       |                      | Irrua                                 | Esan Central    | Edo    |
| 1390 | ED/0016 | ED/0016/S/2  | Irrua Specialist Hospital       |                      | Irrua                                 | Esan Central    | Edo    |
| 1391 | ED/0016 | ED/0016/S/3  | Irrua Specialist Hospital       |                      | Irrua                                 | Esan Central    | Edo    |
| 1392 | ED/0016 | ED/0016/S/1  | Irrua Specialist Hospital       |                      | Irrua                                 | Esan Central    | Edo    |
| 1393 | ED/0016 | ED/0016/S/10 | Irrua Specialist Hospital       |                      | Irrua                                 | Esan Central    | Edo    |
| 1394 | ED/0021 | ED/0021/S/6  | Central Hospital, Uromi         |                      | Uromi                                 | Esan North East | Edo    |
| 1395 | ED/0021 | ED/0021/S/7  | Central Hospital, Uromi         |                      | Uromi                                 | Esan North East | Edo    |
| 1396 | ED/0021 | ED/0021/S/1  | Central Hospital, Uromi         |                      | Uromi                                 | Esan North East | Edo    |
| 1397 | ED/0021 | ED/0021/S/3  | Central Hospital, Uromi         |                      | Uromi                                 | Esan North East | Edo    |
| 1398 | ED/0021 | ED/0021/S/8  | Central Hospital, Uromi         |                      | Uromi                                 | Esan North East | Edo    |
| 1399 | ED/0021 | ED/0021/S/2  | Central Hospital, Uromi         |                      | Uromi                                 | Esan North East | Edo    |
| 1400 | ED/0024 | ED/0024/S/2  | General Hospital, Ubiaja        |                      | Ubiaja                                | Esan South East | Edo    |

|      |         |              |                              |  |                                                             |                 |     |
|------|---------|--------------|------------------------------|--|-------------------------------------------------------------|-----------------|-----|
| 1401 | ED/0025 | ED/0025/S/1  | District Hospital, Ewohinmi  |  | Ewohinmi                                                    | Esan South East | Edo |
| 1402 | ED/0025 | ED/0025/S/2  | District Hospital, Ewohinmi  |  | Ewohinmi                                                    | Esan South East | Edo |
| 1403 | ED/0026 | ED/0026/S/2  | General Hospital, Iruokpen   |  | Iruokpen, Along Benin Auchi Road                            | Esan West       | Edo |
| 1404 | ED/0026 | ED/0026/S/1  | General Hospital, Iruokpen   |  | Iruokpen, Along Benin Auchi Road                            | Esan West       | Edo |
| 1405 | ED/0026 | ED/0026/S/6  | General Hospital, Iruokpen   |  | Iruokpen, Along Benin Auchi Road                            | Esan West       | Edo |
| 1406 | ED/0027 | ED/0027/S/2  | General Hospital, Ekpoma     |  | Ekpoma                                                      | Esan West       | Edo |
| 1407 | ED/0027 | ED/0027/S/1  | General Hospital, Ekpoma     |  | Ekpoma                                                      | Esan West       | Edo |
| 1408 | ED/0033 | ED/0033/S/3  | General Hospital, Agenebode  |  | Agenebode                                                   | Etsako East     | Edo |
| 1409 | ED/0033 | ED/0033/S/10 | General Hospital, Agenebode  |  | Agenebode                                                   | Etsako East     | Edo |
| 1410 | ED/0033 | ED/0033/S/6  | General Hospital, Agenebode  |  | Agenebode                                                   | Etsako East     | Edo |
| 1411 | ED/0033 | ED/0033/S/4  | General Hospital, Agenebode  |  | Agenebode                                                   | Etsako East     | Edo |
| 1412 | ED/0033 | ED/0033/S/2  | General Hospital, Agenebode  |  | Agenebode                                                   | Etsako East     | Edo |
| 1413 | ED/0033 | ED/0033/S/1  | General Hospital, Agenebode  |  | Agenebode                                                   | Etsako East     | Edo |
| 1414 | ED/0033 | ED/0033/S/5  | General Hospital, Agenebode  |  | Agenebode                                                   | Etsako East     | Edo |
| 1415 | ED/0035 | ED/0035/S/2  | General Hospital, Agbede     |  | Agbede                                                      | Etsako West     | Edo |
| 1416 | ED/0035 | ED/0035/S/6  | General Hospital, Agbede     |  | Agbede                                                      | Etsako West     | Edo |
| 1417 | ED/0035 | ED/0035/S/5  | General Hospital, Agbede     |  | Agbede                                                      | Etsako West     | Edo |
| 1418 | ED/0035 | ED/0035/S/1  | General Hospital, Agbede     |  | Agbede                                                      | Etsako West     | Edo |
| 1419 | ED/0035 | ED/0035/S/4  | General Hospital, Agbede     |  | Agbede                                                      | Etsako West     | Edo |
| 1420 | ED/0036 | ED/0036/S/11 | Central Hospital, Auchi      |  | Auchi                                                       | Etsako West     | Edo |
| 1421 | ED/0036 | ED/0036/S/3  | Central Hospital, Auchi      |  | Auchi                                                       | Etsako West     | Edo |
| 1422 | ED/0036 | ED/0036/S/10 | Central Hospital, Auchi      |  | Auchi                                                       | Etsako West     | Edo |
| 1423 | ED/0036 | ED/0036/S/8  | Central Hospital, Auchi      |  | Auchi                                                       | Etsako West     | Edo |
| 1424 | ED/0036 | ED/0036/S/2  | Central Hospital, Auchi      |  | Auchi                                                       | Etsako West     | Edo |
| 1425 | ED/0036 | ED/0036/S/6  | Central Hospital, Auchi      |  | Auchi                                                       | Etsako West     | Edo |
| 1426 | ED/0036 | ED/0036/S/1  | Central Hospital, Auchi      |  | Auchi                                                       | Etsako West     | Edo |
| 1427 | ED/0041 | ED/0041/S/1  | General Hospital, Igueben    |  | Igueben                                                     | Igueben         | Edo |
| 1428 | ED/0041 | ED/0041/S/2  | General Hospital, Igueben    |  | Igueben                                                     | Igueben         | Edo |
| 1429 | ED/0041 | ED/0041/S/6  | General Hospital, Igueben    |  | Igueben                                                     | Igueben         | Edo |
| 1430 | ED/0043 | ED/0043/S/5  | Narrow Way Clinic            |  | No.9, S. Ahahor Street, Off Benin-Auchi Expressway, Aduwawa | Ikpoba/Okha     | Edo |
| 1431 | ED/0049 | ED/0049/S/5  | Ekpen Hospital               |  | Off Agho Street, Off Ekwenwan Road                          | Oredo           | Edo |
| 1432 | ED/0049 | ED/0049/S/4  | Ekpen Hospital               |  | Off Agho Street, Off Ekwenwan Road                          | Oredo           | Edo |
| 1433 | ED/0050 | ED/0050/S/8  | Central Hospital, Benin      |  | Along Sapele Road, Near Ring Road, Benin                    | Oredo           | Edo |
| 1434 | ED/0050 | ED/0050/S/4  | Central Hospital, Benin      |  | Along Sapele Road, Near Ring Road, Benin                    | Oredo           | Edo |
| 1435 | ED/0050 | ED/0050/S/1  | Central Hospital, Benin      |  | Along Sapele Road, Near Ring Road, Benin                    | Oredo           | Edo |
| 1436 | ED/0050 | ED/0050/S/2  | Central Hospital, Benin      |  | Along Sapele Road, Near Ring Road, Benin                    | Oredo           | Edo |
| 1437 | ED/0050 | ED/0050/S/5  | Central Hospital, Benin      |  | Along Sapele Road, Near Ring Road, Benin                    | Oredo           | Edo |
| 1438 | ED/0050 | ED/0050/S/15 | Central Hospital, Benin      |  | Along Sapele Road, Near Ring Road, Benin                    | Oredo           | Edo |
| 1439 | ED/0050 | ED/0050/S/6  | Central Hospital, Benin      |  | Along Sapele Road, Near Ring Road, Benin                    | Oredo           | Edo |
| 1440 | ED/0050 | ED/0050/S/3  | Central Hospital, Benin      |  | Along Sapele Road, Near Ring Road, Benin                    | Oredo           | Edo |
| 1441 | ED/0055 | ED/0055/S/5  | General Hospital, Orhionmwom |  | Abudu Town, Orhionmwom                                      | Orhionmwom      | Edo |
| 1442 | ED/0055 | ED/0055/S/4  | General Hospital, Orhionmwom |  | Abudu Town, Orhionmwom                                      | Orhionmwom      | Edo |
| 1443 | ED/0055 | ED/0055/S/3  | General Hospital, Orhionmwom |  | Abudu Town, Orhionmwom                                      | Orhionmwom      | Edo |
| 1444 | ED/0055 | ED/0055/S/6  | General Hospital, Orhionmwom |  | Abudu Town, Orhionmwom                                      | Orhionmwom      | Edo |



|      |         |              |                                     |                                                               |                                                              |                 |     |
|------|---------|--------------|-------------------------------------|---------------------------------------------------------------|--------------------------------------------------------------|-----------------|-----|
| 1445 | ED/0055 | ED/0055/S/1  | General Hospital, Orhionmwom        |                                                               | Abudu Town, Orhionmwom                                       | Orhionmwon      | Edo |
| 1446 | ED/0055 | ED/0055/S/2  | General Hospital, Orhionmwom        |                                                               | Abudu Town, Orhionmwom                                       | Orhionmwon      | Edo |
| 1447 | ED/0057 | ED/0057/S/2  | Government Hospital, Urhonigbe      |                                                               | Urhonigbe Along Agbor Abraka Road.                           | Orhionmwon      | Edo |
| 1448 | ED/0057 | ED/0057/S/6  | Government Hospital, Urhonigbe      |                                                               | Urhonigbe Along Agbor Abraka Road.                           | Orhionmwon      | Edo |
| 1449 | ED/0057 | ED/0057/S/1  | Government Hospital, Urhonigbe      |                                                               | Urhonigbe Along Agbor Abraka Road.                           | Orhionmwon      | Edo |
| 1450 | ED/0057 | ED/0057/S/5  | Government Hospital, Urhonigbe      |                                                               | Urhonigbe Along Agbor Abraka Road.                           | Orhionmwon      | Edo |
| 1451 | ED/0057 | ED/0057/S/4  | Government Hospital, Urhonigbe      |                                                               | Urhonigbe Along Agbor Abraka Road.                           | Orhionmwon      | Edo |
| 1452 | ED/0061 | ED/0061/S/4  | Igbinedion Hospital & Med. Research |                                                               | Okada Wonderland                                             | Ovia North East | Edo |
| 1453 | ED/0061 | ED/0061/S/5  | Igbinedion Hospital & Med. Research |                                                               | Okada Wonderland                                             | Ovia North East | Edo |
| 1454 | ED/0062 | ED/0062/S/2  | District Hospital, Ekiadolor        |                                                               | Ekiadolor                                                    | Ovia North East | Edo |
| 1455 | ED/0062 | ED/0062/S/1  | District Hospital, Ekiadolor        |                                                               | Ekiadolor                                                    | Ovia North East | Edo |
| 1456 | ED/0065 | ED/0065/S/5  | General Hospital, Iguobazuwa        |                                                               | Iguobazuwa Town, Hq Of Ovia South-West, LGA                  | Ovia South West | Edo |
| 1457 | ED/0065 | ED/0065/S/2  | General Hospital, Iguobazuwa        |                                                               | Iguobazuwa Town, Hq Of Ovia South-West, LGA                  | Ovia South West | Edo |
| 1458 | ED/0065 | ED/0065/S/1  | General Hospital, Iguobazuwa        |                                                               | Iguobazuwa Town, Hq Of Ovia South-West, LGA                  | Ovia South West | Edo |
| 1459 | ED/0065 | ED/0065/S/4  | General Hospital, Iguobazuwa        |                                                               | Iguobazuwa Town, Hq Of Ovia South-West, LGA                  | Ovia South West | Edo |
| 1460 | ED/0065 | ED/0065/S/6  | General Hospital, Iguobazuwa        |                                                               | Iguobazuwa Town, Hq Of Ovia South-West, LGA                  | Ovia South West | Edo |
| 1461 | ED/0066 | ED/0066/S/4  | Government Hospital, Usen           |                                                               | Usen                                                         | Ovia South West | Edo |
| 1462 | ED/0066 | ED/0066/S/5  | Government Hospital, Usen           |                                                               | Usen                                                         | Ovia South West | Edo |
| 1463 | ED/0066 | ED/0066/S/1  | Government Hospital, Usen           |                                                               | Usen                                                         | Ovia South West | Edo |
| 1464 | ED/0066 | ED/0066/S/6  | Government Hospital, Usen           |                                                               | Usen                                                         | Ovia South West | Edo |
| 1465 | ED/0066 | ED/0066/S/2  | Government Hospital, Usen           |                                                               | Usen                                                         | Ovia South West | Edo |
| 1466 | ED/0074 | ED/0074/S/2  | Government Hospital                 | Gen. Medicine, Gen. Surgery, Paediatric, Laboratory, Pharmacy | Uzebba                                                       | Owan West       | Edo |
| 1467 | ED/0074 | ED/0074/S/1  | Government Hospital                 | Gen. Medicine, Gen. Surgery, Paediatric, Laboratory, Pharmacy | Uzebba                                                       | Owan West       | Edo |
| 1468 | ED/0074 | ED/0074/S/6  | Government Hospital                 | Gen. Medicine, Gen. Surgery, Paediatric, Laboratory, Pharmacy | Uzebba                                                       | Owan West       | Edo |
| 1469 | ED/0076 | ED/0076/S/4  | District Hospital, Uhumwode-Egba    |                                                               | Egba                                                         | Uhumwode        | Edo |
| 1470 | ED/0076 | ED/0076/S/2  | District Hospital, Uhumwode-Egba    |                                                               | Egba                                                         | Uhumwode        | Edo |
| 1471 | ED/0076 | ED/0076/S/5  | District Hospital, Uhumwode-Egba    |                                                               | Egba                                                         | Uhumwode        | Edo |
| 1472 | ED/0076 | ED/0076/S/1  | District Hospital, Uhumwode-Egba    |                                                               | Egba                                                         | Uhumwode        | Edo |
| 1473 | ED/0076 | ED/0076/S/6  | District Hospital, Uhumwode-Egba    |                                                               | Egba                                                         | Uhumwode        | Edo |
| 1474 | ED/0077 | ED/0077/S/1  | Cottage Hospital, Obayanto          |                                                               | Obayantor, Along Sapele Road, New Benin Owena River Basin De | Orhionmwon      | Edo |
| 1475 | ED/0077 | ED/0077/S/2  | Cottage Hospital, Obayanto          |                                                               | Obayantor, Along Sapele Road, New Benin Owena River Basin De | Orhionmwon      | Edo |
| 1476 | ED/0080 | ED/0080/S/10 | General Hospital, Fugar             |                                                               | Fugar                                                        | Etsako Central  | Edo |
| 1477 | ED/0080 | ED/0080/S/4  | General Hospital, Fugar             |                                                               | Fugar                                                        | Etsako Central  | Edo |
| 1478 | ED/0080 | ED/0080/S/3  | General Hospital, Fugar             |                                                               | Fugar                                                        | Etsako Central  | Edo |
| 1479 | ED/0080 | ED/0080/S/5  | General Hospital, Fugar             |                                                               | Fugar                                                        | Etsako Central  | Edo |
| 1480 | ED/0080 | ED/0080/S/6  | General Hospital, Fugar             |                                                               | Fugar                                                        | Etsako Central  | Edo |
| 1481 | ED/0080 | ED/0080/S/1  | General Hospital, Fugar             |                                                               | Fugar                                                        | Etsako Central  | Edo |
| 1482 | ED/0084 | ED/0084/S/11 | Azuwa Hospital                      |                                                               | 2nd West East, Benin City                                    | Oredo           | Edo |
| 1483 | ED/0084 | ED/0084/S/5  | Azuwa Hospital                      |                                                               | 2nd West East, Benin City                                    | Oredo           | Edo |

|      |         |              |                                              |               |                                                       |             |     |
|------|---------|--------------|----------------------------------------------|---------------|-------------------------------------------------------|-------------|-----|
| 1484 | ED/0084 | ED/0084/S/15 | Azuwa Hospital                               |               | 2nd West East, Benin City                             | Oredo       | Edo |
| 1485 | ED/0084 | ED/0084/S/2  | Azuwa Hospital                               |               | 2nd West East, Benin City                             | Oredo       | Edo |
| 1486 | ED/0087 | ED/0087/S/5  | Urban Medical Centre                         |               | Warrake                                               | Owan West   | Edo |
| 1487 | ED/0089 | ED/0089/S/4  | Ihenyen Medical Centre                       |               | No. 22, Ogbefun Street, Off College Road, Benin City  | Oredo       | Edo |
| 1488 | ED/0090 | ED/0090/S/3  | Time Hospital                                |               | 3,2, Agbonma Lane, Off Ekwenwa Road, Benin City       | Oredo       | Edo |
| 1489 | ED/0090 | ED/0090/S/5  | Time Hospital                                |               | 3,2, Agbonma Lane, Off Ekwenwa Road, Benin City       | Oredo       | Edo |
| 1490 | ED/0090 | ED/0090/S/4  | Time Hospital                                |               | 3,2, Agbonma Lane, Off Ekwenwa Road, Benin City       | Oredo       | Edo |
| 1491 | ED/0096 | ED/0096/S/4  | V. J. Essex Pharm                            | Pharmacy      | 138 Ekenuwan Road, Benin                              | Oredo       | Edo |
| 1492 | ED/0097 | ED/0097/S/4  | Vamak Pharmacy                               | Pharmacy      | 66 Igbe Road, Auchi                                   | Etsako West | Edo |
| 1493 | ED/0103 | ED/0103/S/11 | Fortune Physiotherapy Clinic                 | Physiotherapy | Ire Street, Off Wire Road, or I.C.E. Road, Benin City | Oredo       | Edo |
| 1494 | ED/0104 | ED/0104/S    | Horatio Dental Clinic                        | Dental        | No. 8, Akenzua Road, Off Plymouth, Benin City         | Oredo       | Edo |
| 1495 | ED/0108 | ED/0108/S/4  | Viviski Pharmaceuticals Ltd.                 | Pharmacy      | Benin City                                            | Oredo       | Edo |
| 1496 | ED/0109 | ED/0109/S/4  | Coka Chemist Ltd.                            | Pharmacy      | Benin City                                            | Oredo       | Edo |
| 1497 | ED/0111 | ED/0111/S/5  | O.P.R.I. Medical Laboratory Services         | Laboratory    | No. 31, Ikpoba Hill Road, Benin City                  | Oredo       | Edo |
| 1498 | ED/0118 | ED/0118/S/7  | University Of Benin Teaching Hospital Ugbowo |               | Benin City                                            | Egor        | Edo |
| 1499 | ED/0118 | ED/0118/S/15 | University Of Benin Teaching Hospital Ugbowo |               | Benin City                                            | Egor        | Edo |
| 1500 | ED/0118 | ED/0118/S/1  | University Of Benin Teaching Hospital Ugbowo |               | Benin City                                            | Egor        | Edo |
| 1501 | ED/0118 | ED/0118/S/11 | University Of Benin Teaching Hospital Ugbowo |               | Benin City                                            | Egor        | Edo |
| 1502 | ED/0118 | ED/0118/S/6  | University Of Benin Teaching Hospital Ugbowo |               | Benin City                                            | Egor        | Edo |
| 1503 | ED/0118 | ED/0118/S/4  | University Of Benin Teaching Hospital Ugbowo |               | Benin City                                            | Egor        | Edo |
| 1504 | ED/0118 | ED/0118/S/8  | University Of Benin Teaching Hospital Ugbowo |               | Benin City                                            | Egor        | Edo |
| 1505 | ED/0118 | ED/0118/S/2  | University Of Benin Teaching Hospital Ugbowo |               | Benin City                                            | Egor        | Edo |
| 1506 | ED/0118 | ED/0118/S/3  | University Of Benin Teaching Hospital Ugbowo |               | Benin City                                            | Egor        | Edo |
| 1507 | ED/0125 | ED/0125/S/8  | 4 Bde MC Benin                               |               | Benin, Edo State                                      | Oredo       | Edo |
| 1508 | ED/0127 | ED/0127/S/4  | University of Benin Health Centre            |               | Benin, Edo State                                      | Oredo       | Edo |
| 1509 | ED/0127 | ED/0127/S/5  | University of Benin Health Centre            |               | Benin, Edo State                                      | Oredo       | Edo |
| 1510 | ED/0133 | ED/0133/S/14 | Ayunko Clinic & Maternity                    |               | 39 Fed. Govt. College Rd., Ibillo                     | Akoko Edo   | Edo |
| 1511 | ED/0134 | ED/0134/S/14 | Hope Clinic & Maternity                      |               | No. 1 Whytehouse Street, Jatau, Auchi, Edo State      | Etsako West | Edo |
| 1512 | ED/0135 | ED/0135/S/7  | Faith Mediplex                               |               | Igiwa-Amadi/Airport Road GRA, Benin City, Edo State   | Oredo       | Edo |
| 1513 | ED/0135 | ED/0135/S/3  | Faith Mediplex                               |               | Igiwa-Amadi/Airport Road GRA, Benin City, Edo State   | Oredo       | Edo |
| 1514 | ED/0135 | ED/0135/S/4  | Faith Mediplex                               |               | Igiwa-Amadi/Airport Road GRA, Benin City, Edo State   | Oredo       | Edo |
| 1515 | ED/0135 | ED/0135/S/6  | Faith Mediplex                               |               | Igiwa-Amadi/Airport Road GRA, Benin City, Edo State   | Oredo       | Edo |
| 1516 | ED/0135 | ED/0135/S/8  | Faith Mediplex                               |               | Igiwa-Amadi/Airport Road GRA, Benin City, Edo State   | Oredo       | Edo |
| 1517 | ED/0135 | ED/0135/S/5  | Faith Mediplex                               |               | Igiwa-Amadi/Airport Road GRA, Benin City, Edo State   | Oredo       | Edo |
| 1518 | ED/0135 | ED/0135/S/2  | Faith Mediplex                               |               | Igiwa-Amadi/Airport Road GRA, Benin City, Edo State   | Oredo       | Edo |

|      |         |              |                                          |               |                                                                                                      |             |     |
|------|---------|--------------|------------------------------------------|---------------|------------------------------------------------------------------------------------------------------|-------------|-----|
| 1519 | ED/0135 | ED/0135/S/1  | Faith Mediplex                           |               | Igiwa-Amadi/Airport Road<br>GRA, Benin City, Edo State                                               | Oredo       | Edo |
| 1520 | ED/0138 | ED/0138/S/3  | Osula Royal Hospital                     | Primary       | No.5 Idahosa Lane, Oredo<br>LGA                                                                      | Oredo       | Edo |
| 1521 | ED/0139 | ED/0139/S/1  | The Rock Hospital                        | Primary       | 39 Imuetinyan Street, Off<br>Ihama Rd, G.R.A Benin Edo<br>State                                      | Oredo       | Edo |
| 1522 | ED/0139 | ED/0139/S/6  | The Rock Hospital                        | Primary       | 39 Imuetinyan Street, Off<br>Ihama Rd, G.R.A Benin Edo<br>State                                      | Oredo       | Edo |
| 1523 | ED/0139 | ED/0139/S/3  | The Rock Hospital                        | Primary       | 39 Imuetinyan Street, Off<br>Ihama Rd, G.R.A Benin Edo<br>State                                      | Oredo       | Edo |
| 1524 | ED/0142 | ED/0142/S/1  | Our Medical Centre                       |               | No. 2 Oregbeni Street,<br>Ikpoba Hill, Ikoba, Benin City                                             | Ikpoba/Okha | Edo |
| 1525 | ED/0143 | ED/0143/S/10 | Lahor Research Lab. &<br>Medical Centre  |               | 121 Old Benin, Agbor Road,<br>Benin City                                                             | Ikpoba/Okha | Edo |
| 1526 | ED/0143 | ED/0143/S/5  | Lahor Research Lab. &<br>Medical Centre  |               | 121 Old Benin, Agbor Road,<br>Benin City                                                             | Ikpoba/Okha | Edo |
| 1527 | ED/0144 | ED/0144/S/6  | St. Rapheal Hospital                     |               | 12, Adesua Road, Oredo<br>LGA, Benin City                                                            | Oredo       | Edo |
| 1528 | ED/0144 | ED/0144/S/15 | St. Rapheal Hospital                     |               | 12, Adesua Road, Oredo<br>LGA, Benin City                                                            | Oredo       | Edo |
| 1529 | ED/0145 | ED/0145/S/5  | Aniso Specialist<br>Medical Center       |               | No. 11 2nd Fed. Road, Off<br>4th Srt Road or Off Benin<br>Technical Coal Rd, Uselu Ltd<br>Benin City | Egor        | Edo |
| 1530 | ED/0145 | ED/0145/S/2  | Aniso Specialist<br>Medical Center       |               | No. 11 2nd Fed. Road, Off<br>4th Srt Road or Off Benin<br>Technical Coal Rd, Uselu Ltd<br>Benin City | Egor        | Edo |
| 1531 | ED/0147 | ED/0147/S/4  | Cystius Pharmacy                         | Pharmacy      | 8, Uwasota Road, Ugbowo,<br>Benin City, Edo State                                                    | Oredo       | Edo |
| 1532 | ED/0149 | ED/0149/S/8  | Tomsek Dental Clinic                     | Dental        | 54B, Saponba Road, Benin<br>City, Edo State                                                          | Oredo       | Edo |
| 1533 | ED/0156 | ED/0156/S/5  | Day Jay Medical<br>Diagnostic Laboratory | Laboratory    | 150 Upper Mission Road,<br>Benin City, Edo State                                                     | Oredo       | Edo |
| 1534 | ED/0157 | ED/0157/S    | Stalwart Eye Centre                      | Ophthalmology | Mechatronic Plaza, 23<br>Ihama Road, GRA, Benin<br>City, Edo State                                   | Oredo       | Edo |
| 1535 | ED/0158 | ED/0158/S/8  | Gil Gal Dental Clinic                    | Dental        | No.7 Ihama Road GRA,<br>Benin City, Edo State                                                        | Oredo       | Edo |
| 1536 | ED/0161 | ED/0161/S/1  | Alges Pharmacy Ltd                       | Pharmacy      | 24 A Ugbowo Lagos Road                                                                               | Oredo       | Edo |
| 1537 | ED/0165 | ED/0165/S/3  | Akemekhai Medical<br>Centre              |               | 3, Oyerekhau Lane, Jattu,<br>Esako West, Auchi, Edo<br>State                                         | Etsako West | Edo |
| 1538 | ED/0165 | ED/0165/S/1  | Akemekhai Medical<br>Centre              |               | 3, Oyerekhau Lane, Jattu,<br>Esako West, Auchi, Edo<br>State                                         | Etsako West | Edo |
| 1539 | ED/0165 | ED/0165/S/14 | Akemekhai Medical<br>Centre              |               | 3, Oyerekhau Lane, Jattu,<br>Esako West, Auchi, Edo<br>State                                         | Etsako West | Edo |
| 1540 | ED/0167 | ED/0167/S/4  | Auchi Polytechnic<br>Medical Centre      |               | Auchi, Edo State                                                                                     | Etsako East | Edo |
| 1541 | ED/0168 | ED/0168/S/1  | Hope Hospital &<br>Maternity             |               | 42, Costain Road, Benin, Edo<br>State                                                                | Oredo       | Edo |
| 1542 | ED/0171 | ED/0171/S/1  | Ogbeide Gen. Practice<br>Clinic          |               | 58, Uwa Str., off 2nd East<br>Circular Road, Benin.                                                  | Oredo       | Edo |
| 1543 | ED/0171 | ED/0171/S/2  | Ogbeide Gen. Practice<br>Clinic          |               | 58, Uwa Str., off 2nd East<br>Circular Road, Benin.                                                  | Oredo       | Edo |
| 1544 | ED/0176 | ED/0176/S/3  | Hope Medical Centre,<br>Igbueben         |               | 7 Suleman Street off sapele<br>road, Benin City                                                      | Igbueben    | Edo |
| 1545 | ED/0178 | ED/0178/S/3  | Gift Medical Clinic                      |               | 6a, Iyamu Str., off Erie Str.,<br>Benin                                                              | Oredo       | Edo |
| 1546 | ED/0179 | ED/0179/S/1  | Echos Hospital                           |               | 5, Benin Technical College<br>Road, Benin                                                            | Egor        | Edo |
| 1547 | ED/0179 | ED/0179/S/15 | Echos Hospital                           |               | 5, Benin Technical College<br>Road, Benin                                                            | Egor        | Edo |
| 1548 | ED/0184 | ED/0184/S/3  | Irowa Medical Centre                     |               | Jos-Bazuaye Est. off Sapele<br>Road, Benin, Edo State                                                | Oredo       | Edo |
| 1549 | ED/0184 | ED/0184/S/5  | Irowa Medical Centre                     |               | Jos-Bazuaye Est. off Sapele<br>Road, Benin, Edo State                                                | Oredo       | Edo |
| 1550 | ED/0188 | ED/0188/S/11 | Cedan Physiotherapy<br>Centre            | Physiotherapy | 12, Aiwerioba Avenue, Off<br>Akenzua Street, Benin                                                   | Oredo       | Edo |
| 1551 | ED/0190 | ED/0190/S/4  | Elint Pharmacy                           | Pharmacy      | 59, Ugbowo-Lagos Road,<br>Benin                                                                      | Egor        | Edo |
| 1552 | ED/0192 | ED/0192/S/4  | Goodness Pharmacy                        | Pharmacy      | 270b, Ugbowo-Lagos Road,<br>Benin                                                                    | Egor        | Edo |
| 1553 | ED/0195 | ED/0195/S/4  | JIMAH YUSUF<br>PHARMACEUTICAL            | Pharmacy      | 58, OTARU RD,AUCHI                                                                                   | Etsako West | Edo |
| 1554 | ED/0199 | ED/0199/S/5  | NEW GEN MEDICAL<br>DIAGNOSTICS           | Laboratory    | 41,PLYMOUTH RD,BENIN                                                                                 | Oredo       | Edo |

|      |         |              |                                           |               |                                                                       |                 |     |
|------|---------|--------------|-------------------------------------------|---------------|-----------------------------------------------------------------------|-----------------|-----|
| 1555 | ED/0202 | ED/0202/S/4  | OSKAJAY NIG. LTD                          | Pharmacy      | 88,FORESTRY ROAD,BENIN                                                | Oredo           | Edo |
| 1556 | ED/0203 | ED/0203/S/5  | SALAMI MEDICAL LABORATORY                 | Laboratory    | 52 MISSION ROAD, BENIN                                                | Oredo           | Edo |
| 1557 | ED/0205 | ED/0205/S/4  | SYL-WRIGHT CHEMISTS                       | PHARMACY      | 1, BOUNDARY ROAD,BENIN                                                | Oredo           | Edo |
| 1558 | ED/0207 | ED/0207/S/3  | Edi International Hospital                | O&G           | Coronation Drive Off GRA Benin                                        | Oredo           | Edo |
| 1559 | ED/0208 | ED/0208/S/5  | Orbiose Hospital                          | Laboratory    | 2 Isibor Agbontan Street, Off Benin/Auchi Road Aduwawa                | Ikpoba/Okha     | Edo |
| 1560 | ED/0209 | ED/0209/S/15 | Mayo's Eye Clinic                         | Ophthalmology | 32 Utoinwan Street, New Benin                                         | Oredo           | Edo |
| 1561 | ED/0211 | ED/0211/S/15 | Prime Optical and Eye Clinic              | Ophthalmology | 41 Airport Road, Benin                                                | Oredo           | Edo |
| 1562 | ED/0217 | ED/0217/S/13 | St Philomina Catholic Hospital            |               | 23 Dawson Road, off Mission Road, Benin City                          | Oredo           | Edo |
| 1563 | ED/0217 | ED/0217/S/1  | St Philomina Catholic Hospital            |               | 23 Dawson Road, off Mission Road, Benin City                          | Oredo           | Edo |
| 1564 | ED/0217 | ED/0217/S/2  | St Philomina Catholic Hospital            |               | 23 Dawson Road, off Mission Road, Benin City                          | Oredo           | Edo |
| 1565 | ED/0217 | ED/0217/S/3  | St Philomina Catholic Hospital            |               | 23 Dawson Road, off Mission Road, Benin City                          | Oredo           | Edo |
| 1566 | ED/0217 | ED/0217/S/4  | St Philomina Catholic Hospital            |               | 23 Dawson Road, off Mission Road, Benin City                          | Oredo           | Edo |
| 1567 | ED/0217 | ED/0217/S/5  | St Philomina Catholic Hospital            |               | 23 Dawson Road, off Mission Road, Benin City                          | Oredo           | Edo |
| 1568 | ED/0217 | ED/0217/S/6  | St Philomina Catholic Hospital            |               | 23 Dawson Road, off Mission Road, Benin City                          | Oredo           | Edo |
| 1569 | ED/0217 | ED/0217/S/7  | St Philomina Catholic Hospital            |               | 23 Dawson Road, off Mission Road, Benin City                          | Oredo           | Edo |
| 1570 | ED/0218 | ED/0218/S/6  | Stella Obasanjo Women & Children Hospital |               | Country Home, Hotel Road, Benin City                                  | Oredo           | Edo |
| 1571 | ED/0218 | ED/0218/S/8  | Stella Obasanjo Women & Children Hospital |               | Country Home, Hotel Road, Benin City                                  | Oredo           | Edo |
| 1572 | ED/0218 | ED/0218/S/1  | Stella Obasanjo Women & Children Hospital |               | Country Home, Hotel Road, Benin City                                  | Oredo           | Edo |
| 1573 | ED/0218 | ED/0218/S/2  | Stella Obasanjo Women & Children Hospital |               | Country Home, Hotel Road, Benin City                                  | Oredo           | Edo |
| 1574 | ED/0218 | ED/0218/S/7  | Stella Obasanjo Women & Children Hospital |               | Country Home, Hotel Road, Benin City                                  | Oredo           | Edo |
| 1575 | ED/0218 | ED/0218/S/15 | Stella Obasanjo Women & Children Hospital |               | Country Home, Hotel Road, Benin City                                  | Oredo           | Edo |
| 1576 | ED/0218 | ED/0218/S/12 | Stella Obasanjo Women & Children Hospital |               | Country Home, Hotel Road, Benin City                                  | Oredo           | Edo |
| 1577 | ED/0218 | ED/0218/S/5  | Stella Obasanjo Women & Children Hospital |               | Country Home, Hotel Road, Benin City                                  | Oredo           | Edo |
| 1578 | ED/0218 | ED/0218/S/4  | Stella Obasanjo Women & Children Hospital |               | Country Home, Hotel Road, Benin City                                  | Oredo           | Edo |
| 1579 | ED/0218 | ED/0218/S/3  | Stella Obasanjo Women & Children Hospital |               | Country Home, Hotel Road, Benin City                                  | Oredo           | Edo |
| 1580 | ED/0220 | ED/0220/S/4  | Ladith Pharmaceutical Ltd                 |               | No. 77,Airport Road, Benin Edo State                                  | Oredo           | Edo |
| 1581 | ED/0221 | ED/0221/S/4  | Ladith Pharmaceutical co. Ltd             |               | 59,Ore-Oghene Near Olihia MKT Benin Edo State                         | Oredo           | Edo |
| 1582 | ED/0223 | ED/0223/S/5  | Ovbioise Hospital                         |               | 2 Isibor Aigbontaen Street, Aduwawa, Benin City                       | Ikpoba/Okha     | Edo |
| 1583 | ED/0224 | ED/0224/S/15 | Uwa Eye Clinic                            |               | 8, Igun Street, Off. Sakpomba RD.                                     | Oredo           | Edo |
| 1584 | ED/0227 | ED/0227/S/2  | Ukponmwan Foundation Hospital             |               | 53 Idahosa Street, Benin City, Edo State                              | Oredo           | Edo |
| 1585 | ED/0227 | ED/0227/S/15 | Ukponmwan Foundation Hospital             |               | 53 Idahosa Street, Benin City, Edo State                              | Oredo           | Edo |
| 1586 | ED/0231 | ED/0231/S/4  | Flowell Pharma Nig.Ltd                    |               | 69b Sapele RD.                                                        | Oredo           | Edo |
| 1587 | ED/0233 | ED/0233/S/3  | Life Medical Centre                       |               | 34 Guobadia Street, Off Ugbor Rd, G.R.A, Benin City Edo State.        | Egor            | Edo |
| 1588 | ED/0240 | ED/0240/S/3  | St. Camillus Hospital                     |               | Uromi Edo State                                                       | Esan North East | Edo |
| 1589 | ED/0240 | ED/0240/S/5  | St. Camillus Hospital                     |               | Uromi Edo State                                                       | Esan North East | Edo |
| 1590 | ED/0240 | ED/0240/S/4  | St. Camillus Hospital                     |               | Uromi Edo State                                                       | Esan North East | Edo |
| 1591 | ED/0241 | ED/0241/S/3  | Fountain Of Life Specialist Hospital      |               | 3B Ogbesasa Street, Off Sapele Road Edo State                         | Oredo           | Edo |
| 1592 | ED/0242 | ED/0242/S/4  | Edi International Hospital                |               | No. 1,Coronation Drive, Off Adeyan Avenue ,G.R.A Benin City Edo State | Oredo           | Edo |

|      |         |              |                                      |                                                   |                                                                                            |                 |       |
|------|---------|--------------|--------------------------------------|---------------------------------------------------|--------------------------------------------------------------------------------------------|-----------------|-------|
| 1593 | ED/0242 | ED/0242/S/5  | Edi International Hospital           |                                                   | No. 1,Coronation Drive, Off Adeyan Avenue ,G.R.A Benin City Edo State                      | Oredo           | Edo   |
| 1594 | ED/0248 | ED/0248/S/1  | Total Health Medical Services Center |                                                   | 20, Ayo-Idiaghe Street,Isiohor,Benin Edo State                                             | Egor            | Edo   |
| 1595 | ED/0253 | ED/0253/S/1  | Ebony Medical Centre                 |                                                   | 59 Uwasota Rd, Ugbowo Benin City Edo State                                                 | Egor            | Edo   |
| 1596 | ED/0253 | ED/0253/S/3  | Ebony Medical Centre                 |                                                   | 59 Uwasota Rd, Ugbowo Benin City Edo State                                                 | Egor            | Edo   |
| 1597 | ED/0253 | ED/0253/S/6  | Ebony Medical Centre                 |                                                   | 59 Uwasota Rd, Ugbowo Benin City Edo State                                                 | Egor            | Edo   |
| 1598 | ED/0257 | ED/0257/S/8  | Ubani Dental Clinic                  |                                                   | 77 Momodu Ajayi Road                                                                       | Akoko Edo       | Edo   |
| 1599 | ED/0259 | ED/0259/S/4  | Veras Pharmacy                       |                                                   | Veras Plaza,2-Abuja Express Way, Ibillo ,Edo State                                         | Akoko Edo       | Edo   |
| 1600 | ED/0261 | ED/0261/S/3  | Police Hospital Benin G.R.A          |                                                   | Plot 12,Dennis Osadebey Avenue, Benin Edo State                                            | Oredo           | Edo   |
| 1601 | ED/0261 | ED/0261/S/5  | Police Hospital Benin G.R.A          |                                                   | Plot 12,Dennis Osadebey Avenue, Benin Edo State                                            | Oredo           | Edo   |
| 1602 | ED/0261 | ED/0261/S/7  | Police Hospital Benin G.R.A          |                                                   | Plot 12,Dennis Osadebey Avenue, Benin Edo State                                            | Oredo           | Edo   |
| 1603 | ED/0264 | ED/0264/S/3  | Eromosele Medical Centre             |                                                   | Ujoelen Road Ekpoma                                                                        | Esan West       | Edo   |
| 1604 | ED/0270 | ED/0270/S/2  | Halpha Specialist Hospital           |                                                   | 1,Akhiobanke Street, G.R.A, Benin Edo State                                                | Oredo           | Edo   |
| 1605 | ED/0272 | ED/0272/S/3  | Gims Clinic LTD                      |                                                   | 12 Edebiri Street ,Ogbe Quarters, Benin City Edo State                                     | Oredo           | Edo   |
| 1606 | ED/0272 | ED/0272/S/1  | Gims Clinic LTD                      |                                                   | 12 Edebiri Street ,Ogbe Quarters, Benin City Edo State                                     | Oredo           | Edo   |
| 1607 | ED/0275 | ED/0275/S/3  | Eguavon Medical Centre               |                                                   | No 5,Abia,Iruekpen,Ekpoma,Ed o State                                                       | Esan West       | Edo   |
| 1608 | ED/0275 | ED/0275/S/5  | Eguavon Medical Centre               |                                                   | No 5,Abia,Iruekpen,Ekpoma,Ed o State                                                       | Esan West       | Edo   |
| 1609 | ED/0276 | ED/0276/S/5  | Oriaifo Medical Center               |                                                   | No 1,Oriaifo Close, Uromi-Illushi Road, Uromi Edo State                                    | Esan North East | Edo   |
| 1610 | ED/0276 | ED/0276/S/3  | Oriaifo Medical Center               |                                                   | No 1,Oriaifo Close, Uromi-Illushi Road, Uromi Edo State                                    | Esan North East | Edo   |
| 1611 | ED/0278 | ED/0278/S/5  | Eseohe Medical Center                |                                                   | No. 2,Police Barrack RD ,Off Benin Auchi Express Way, Beside Mousco Petrol Station ,Ekpoma | Esan West       | Edo   |
| 1612 | ED/0278 | ED/0278/S/6  | Eseohe Medical Center                |                                                   | No. 2,Police Barrack RD ,Off Benin Auchi Express Way, Beside Mousco Petrol Station ,Ekpoma | Esan West       | Edo   |
| 1613 | ED/0278 | ED/0278/S/3  | Eseohe Medical Center                |                                                   | No. 2,Police Barrack RD ,Off Benin Auchi Express Way, Beside Mousco Petrol Station ,Ekpoma | Esan West       | Edo   |
| 1614 | ED/0278 | ED/0278/S/1  | Eseohe Medical Center                |                                                   | No. 2,Police Barrack RD ,Off Benin Auchi Express Way, Beside Mousco Petrol Station ,Ekpoma | Esan West       | Edo   |
| 1615 | ED/0279 | ED/0279/S/2  | Halpha Specialist Hospital           |                                                   | 1, Akhiobanke Street, G.R.A, Benin                                                         | Oredo           | Edo   |
| 1616 | ED/0280 | ED/0280/S/2  | Jimon Medical Center                 |                                                   | 152, Upper Owina Street Evbotubu Qtrs, Benin Edo State.                                    | Oredo           | Edo   |
| 1617 | EK/0001 | EK/0001/S/5  | St.Gregory Hospital                  | Laboratory, USS, O & G, Pharmacy, General Surgery | KM 2 Basiri Iyin Road, Ado Ekiti                                                           | Ado Ekiti       | Ekiti |
| 1618 | EK/0001 | EK/0001/S/14 | St.Gregory Hospital                  | Laboratory, USS, O & G, Pharmacy, General Surgery | KM 2 Basiri Iyin Road, Ado Ekiti                                                           | Ado Ekiti       | Ekiti |
| 1619 | EK/0001 | EK/0001/S/4  | St.Gregory Hospital                  | Laboratory, USS, O & G, Pharmacy, General Surgery | KM 2 Basiri Iyin Road, Ado Ekiti                                                           | Ado Ekiti       | Ekiti |
| 1620 | EK/0001 | EK/0001/S/3  | St.Gregory Hospital                  | Laboratory, USS, O & G, Pharmacy, General Surgery | KM 2 Basiri Iyin Road, Ado Ekiti                                                           | Ado Ekiti       | Ekiti |
| 1621 | EK/0001 | EK/0001/S/1  | St.Gregory Hospital                  | Laboratory, USS, O & G, Pharmacy, General Surgery | KM 2 Basiri Iyin Road, Ado Ekiti                                                           | Ado Ekiti       | Ekiti |
| 1622 | EK/0002 | EK/0002/S/5  | Olumorin Specialist Hospital         |                                                   | Ado-Ekiti                                                                                  | Ado Ekiti       | Ekiti |
| 1623 | EK/0002 | EK/0002/S/14 | Olumorin Specialist Hospital         |                                                   | Ado-Ekiti                                                                                  | Ado Ekiti       | Ekiti |

|      |         |              |                                         |                                                      |                                   |           |       |
|------|---------|--------------|-----------------------------------------|------------------------------------------------------|-----------------------------------|-----------|-------|
| 1624 | EK/0002 | EK/0002/S/3  | Olumorin Specialist Hospital            |                                                      | Ado-Ekiti                         | Ado Ekiti | Ekiti |
| 1625 | EK/0004 | EK/0004/S/14 | Ade-Tade Hospital                       |                                                      | 11, Okebola Street, Ado Ekiti     | Ado Ekiti | Ekiti |
| 1626 | EK/0004 | EK/0004/S/5  | Ade-Tade Hospital                       |                                                      | 11, Okebola Street, Ado Ekiti     | Ado Ekiti | Ekiti |
| 1627 | EK/0005 | EK/0005/S/5  | Orire Hospital Complex                  |                                                      | 1, Orire Lane, Box 944, Ado Ekiti | Ado Ekiti | Ekiti |
| 1628 | EK/0006 | EK/0006/S/6  | University Teaching Hospital, Ado Ekiti |                                                      | Ado Ekiti                         | Ado Ekiti | Ekiti |
| 1629 | EK/0006 | EK/0006/S/11 | University Teaching Hospital, Ado Ekiti |                                                      | Ado Ekiti                         | Ado Ekiti | Ekiti |
| 1630 | EK/0006 | EK/0006/S/12 | University Teaching Hospital, Ado Ekiti |                                                      | Ado Ekiti                         | Ado Ekiti | Ekiti |
| 1631 | EK/0006 | EK/0006/S/7  | University Teaching Hospital, Ado Ekiti |                                                      | Ado Ekiti                         | Ado Ekiti | Ekiti |
| 1632 | EK/0006 | EK/0006/S/4  | University Teaching Hospital, Ado Ekiti |                                                      | Ado Ekiti                         | Ado Ekiti | Ekiti |
| 1633 | EK/0006 | EK/0006/S/3  | University Teaching Hospital, Ado Ekiti |                                                      | Ado Ekiti                         | Ado Ekiti | Ekiti |
| 1634 | EK/0006 | EK/0006/S/2  | University Teaching Hospital, Ado Ekiti |                                                      | Ado Ekiti                         | Ado Ekiti | Ekiti |
| 1635 | EK/0006 | EK/0006/S/10 | University Teaching Hospital, Ado Ekiti |                                                      | Ado Ekiti                         | Ado Ekiti | Ekiti |
| 1636 | EK/0006 | EK/0006/S/5  | University Teaching Hospital, Ado Ekiti |                                                      | Ado Ekiti                         | Ado Ekiti | Ekiti |
| 1637 | EK/0006 | EK/0006/S/1  | University Teaching Hospital, Ado Ekiti |                                                      | Ado Ekiti                         | Ado Ekiti | Ekiti |
| 1638 | EK/0007 | EK/0007/S/12 | Federal Teaching Hospital               |                                                      | Ido Ekiti                         | Ido / Osi | Ekiti |
| 1639 | EK/0007 | EK/0007/S/11 | Federal Teaching Hospital               |                                                      | Ido Ekiti                         | Ido / Osi | Ekiti |
| 1640 | EK/0007 | EK/0007/S/3  | Federal Teaching Hospital               |                                                      | Ido Ekiti                         | Ido / Osi | Ekiti |
| 1641 | EK/0007 | EK/0007/S/9  | Federal Teaching Hospital               |                                                      | Ido Ekiti                         | Ido / Osi | Ekiti |
| 1642 | EK/0007 | EK/0007/S/2  | Federal Teaching Hospital               |                                                      | Ido Ekiti                         | Ido / Osi | Ekiti |
| 1643 | EK/0007 | EK/0007/S/4  | Federal Teaching Hospital               |                                                      | Ido Ekiti                         | Ido / Osi | Ekiti |
| 1644 | EK/0007 | EK/0007/S/15 | Federal Teaching Hospital               |                                                      | Ido Ekiti                         | Ido / Osi | Ekiti |
| 1645 | EK/0007 | EK/0007/S/8  | Federal Teaching Hospital               |                                                      | Ido Ekiti                         | Ido / Osi | Ekiti |
| 1646 | EK/0007 | EK/0007/S/7  | Federal Teaching Hospital               |                                                      | Ido Ekiti                         | Ido / Osi | Ekiti |
| 1647 | EK/0007 | EK/0007/S/5  | Federal Teaching Hospital               |                                                      | Ido Ekiti                         | Ido / Osi | Ekiti |
| 1648 | EK/0007 | EK/0007/S/10 | Federal Teaching Hospital               |                                                      | Ido Ekiti                         | Ido / Osi | Ekiti |
| 1649 | EK/0007 | EK/0007/S/6  | Federal Teaching Hospital               |                                                      | Ido Ekiti                         | Ido / Osi | Ekiti |
| 1650 | EK/0011 | EK/0011/S/5  | Joe-Jane Medical Centre                 |                                                      | 27 Dallimore Street, Ado Ekiti    | Ado Ekiti | Ekiti |
| 1651 | EK/0013 | EK/0013/S/4  | State Specialist Hospital               | Pharmacy, Laboratory                                 | Ijero-Ekiti                       | Ijero     | Ekiti |
| 1652 | EK/0013 | EK/0013/S/5  | State Specialist Hospital               | Pharmacy, Laboratory                                 | Ijero-Ekiti                       | Ijero     | Ekiti |
| 1653 | EK/0014 | EK/0014/S/5  | State Specialist Hospital               | Pharmacy, Laboratory                                 | Ikere-Ekiti                       | Ikere     | Ekiti |
| 1654 | EK/0014 | EK/0014/S/4  | State Specialist Hospital               | Pharmacy, Laboratory                                 | Ikere-Ekiti                       | Ikere     | Ekiti |
| 1655 | EK/0016 | EK/0016/S/10 | State Specialist Hospital               | Pharmacy, Laboratory, Orthopaedic, Internal Medicine | Ado                               | Ado Ekiti | Ekiti |
| 1656 | EK/0016 | EK/0016/S/4  | State Specialist Hospital               | Pharmacy, Laboratory, Orthopaedic, Internal Medicine | Ado                               | Ado Ekiti | Ekiti |
| 1657 | EK/0016 | EK/0016/S/2  | State Specialist Hospital               | Pharmacy, Laboratory, Orthopaedic, Internal Medicine | Ado                               | Ado Ekiti | Ekiti |
| 1658 | EK/0016 | EK/0016/S/5  | State Specialist Hospital               | Pharmacy, Laboratory, Orthopaedic, Internal Medicine | Ado                               | Ado Ekiti | Ekiti |
| 1659 | EK/0017 | EK/0017/S/5  | State Specialist Hospital               | Pharmacy, Laboratory                                 | Ikere                             | Ikere     | Ekiti |
| 1660 | EK/0017 | EK/0017/S/4  | State Specialist Hospital               | Pharmacy, Laboratory                                 | Ikere                             | Ikere     | Ekiti |
| 1661 | EK/0018 | EK/0018/S/4  | Federal Medical Centre, Ido-Ekiti       | Pharmacy, Laboratory, Radiology                      | Ido-Ekiti                         | Ado Ekiti | Ekiti |

|      |         |              |                                                     |                                                |                                                                                        |           |       |
|------|---------|--------------|-----------------------------------------------------|------------------------------------------------|----------------------------------------------------------------------------------------|-----------|-------|
| 1662 | EK/0018 | EK/0018/S/7  | Federal Medical Centre, Ido-Ekiti                   | Pharmacy, Laboratory, Radiology                | Ido-Ekiti                                                                              | Ado Ekiti | Ekiti |
| 1663 | EK/0018 | EK/0018/S/5  | Federal Medical Centre, Ido-Ekiti                   | Pharmacy, Laboratory, Radiology                | Ido-Ekiti                                                                              | Ado Ekiti | Ekiti |
| 1664 | EK/0019 | EK/0019/S/7  | State Specialist Hospital                           | Pharmacy, Laboratory, Radiology, Physiotherapy | Ikole Ekiti                                                                            | Ikole     | Ekiti |
| 1665 | EK/0020 | EK/0020/S/4  | Lanre & Lanre Pharmacy                              | Pharmacy                                       | No.10 Akin Akeju Shopping Complex Opp. State                                           | Ado Ekiti | Ekiti |
| 1666 | EK/0023 | EK/0023/S/4  | Julie Pharmacy                                      | Pharmacy                                       | Ado                                                                                    | Ado Ekiti | Ekiti |
| 1667 | EK/0024 | EK/0024/S/5  | Grace Medical Laboratories                          | Laboratory                                     | Ado                                                                                    | Ado Ekiti | Ekiti |
| 1668 | EK/0029 | EK/0029/S/14 | Adetoyin Hospital                                   |                                                | No. L16 Onigari, Secretariat Rd., Ado Ekiti                                            | Ado Ekiti | Ekiti |
| 1669 | EK/0032 | EK/0032/S/5  | Federal Polytechnic Health Centre                   | Primary Provider                               | Ado Ekiti, Ekiti State                                                                 | Ado Ekiti | Ekiti |
| 1670 | EK/0033 | EK/0033/S/1  | VICTORY HOSPITAL                                    |                                                | 2 AWEDELE STR, ADO-EKITI                                                               | Ado Ekiti | Ekiti |
| 1671 | EK/0034 | EK/0034/S/1  | STATE SPECIALIST HOSPITAL                           | O & G, Pharmacy, General Surgery               | IKOLE-EKITI                                                                            | Ikole     | Ekiti |
| 1672 | EK/0035 | EK/0035/S/4  | UNIVERSITY OF ADO EKITI HEALTH CENTRE               |                                                | MAIN CAMPUS                                                                            | Ado Ekiti | Ekiti |
| 1673 | EK/0035 | EK/0035/S/5  | UNIVERSITY OF ADO EKITI HEALTH CENTRE               |                                                | MAIN CAMPUS                                                                            | Ado Ekiti | Ekiti |
| 1674 | EK/0038 | EK/0038/S/2  | Endoscopy De Gilead Specialist Hospital             |                                                | 1, Gilead Lane, NTA Road, off Ilawe Road, Ado-Ekiti                                    | Ado Ekiti | Ekiti |
| 1675 | EK/0047 | EK/0047/S/3  | Maria Assumptia Catholic Hospital                   |                                                | Ireje Street, Ikere Road, Ado Ekiti                                                    | Ado Ekiti | Ekiti |
| 1676 | EK/0055 | EK/0055/S/6  | Maternal Child Specialist Clinic                    |                                                | Adebayo Estate , Former UNAD Health Centre, Iwokoro, Ado Ekiti, Ekiti State.           | Ado Ekiti | Ekiti |
| 1677 | EK/0055 | EK/0055/S/7  | Maternal Child Specialist Clinic                    |                                                | Adebayo Estate , Former UNAD Health Centre, Iwokoro, Ado Ekiti, Ekiti State.           | Ado Ekiti | Ekiti |
| 1678 | EK/0055 | EK/0055/S/15 | Maternal Child Specialist Clinic                    |                                                | Adebayo Estate , Former UNAD Health Centre, Iwokoro, Ado Ekiti, Ekiti State.           | Ado Ekiti | Ekiti |
| 1679 | EK/0055 | EK/0055/S/1  | Maternal Child Specialist Clinic                    |                                                | Adebayo Estate , Former UNAD Health Centre, Iwokoro, Ado Ekiti, Ekiti State.           | Ado Ekiti | Ekiti |
| 1680 | EK/0055 | EK/0055/S/3  | Maternal Child Specialist Clinic                    |                                                | Adebayo Estate , Former UNAD Health Centre, Iwokoro, Ado Ekiti, Ekiti State.           | Ado Ekiti | Ekiti |
| 1681 | EK/0059 | EK/0059/S/3  | Queens Care Specialist Hospital                     |                                                | 1 Unity Avenue, UM Iyin Road, Ado Ekiti, Ekiti State.                                  | Ado Ekiti | Ekiti |
| 1682 | EK/0060 | EK/0060/S/1  | Itunuoluwa Medical Centre                           |                                                | Gbahun Alore Street Ekute Quarters, Ado Street Ekute Quarters, Ado Ekiti, Ekiti State. | Ado Ekiti | Ekiti |
| 1683 | EK/0061 | EK/0061/S/3  | Potter Family Care Clinic                           |                                                | 114 Okela Housing Road Ado Ekiti, Ekiti State                                          | Ado Ekiti | Ekiti |
| 1684 | EK/0062 | EK/0062/S/3  | Olives Specialist Clinics & Fertility Centre.       |                                                | Plot 5 Tiniola Avenue Ekiti Housing Estate Ado Ekiti, Ekiti State.                     | Ado Ekiti | Ekiti |
| 1685 | EK/0063 | EK/0063/S/3  | Eden Life Hospital                                  |                                                | Opp. CAC Comprehensive High Umem Avenue Ilawe Road, Ado Ekiti, Ekiti State.            | Ado Ekiti | Ekiti |
| 1686 | EK/0064 | EK/0064/S/5  | Maternal Child Specialist                           |                                                | Adebayo Road Ado Ekiti, Ekiti State.                                                   | Ado Ekiti | Ekiti |
| 1687 | EK/0067 | EK/0067/S/3  | Unique Consultant Hospital                          |                                                | Adebayo, Ado Ekiti, Ekiti State                                                        | Ado Ekiti | Ekiti |
| 1688 | EK/0069 | EK/0069/S/10 | Grenfield Specialist Hospital and Diagnostic Centre |                                                | Surulere street, off Ora Road, Ido Ekiti, Ekiti State                                  | Ido / Osi | Ekiti |
| 1689 | EK/0071 | EK/0071/S/1  | Dominion Specialist Medical and Diagnostic Centre   |                                                | No. 4, Nova Road, Adebayo, Ado Ekiti, Ekiti State.                                     | Ado Ekiti | Ekiti |
| 1690 | EK/0071 | EK/0071/S/6  | Dominion Specialist Medical and Diagnostic Centre   |                                                | No. 4, Nova Road, Adebayo, Ado Ekiti, Ekiti State.                                     | Ado Ekiti | Ekiti |
| 1691 | EK/0071 | EK/0071/S/3  | Dominion Specialist Medical and Diagnostic Centre   |                                                | No. 4, Nova Road, Adebayo, Ado Ekiti, Ekiti State.                                     | Ado Ekiti | Ekiti |

|      |         |              |                                                  |  |                                                                |             |       |
|------|---------|--------------|--------------------------------------------------|--|----------------------------------------------------------------|-------------|-------|
| 1692 | EK/0074 | EK/0074/S/2  | Heirs Specialist Hospital, Oye Equity            |  | Madam Aluko's House, Irare Estate, Oye Ekiti, Ekiti State.     | Oye         | Ekiti |
| 1693 | EN/0002 | EN/0002/S/7  | St. Patricks Hospital & Maternity                |  | 8, Owerri Road, Asata, Enugu                                   | Enugu East  | Enugu |
| 1694 | EN/0002 | EN/0002/S/3  | St. Patricks Hospital & Maternity                |  | 8, Owerri Road, Asata, Enugu                                   | Enugu East  | Enugu |
| 1695 | EN/0006 | EN/0006/S/2  | Christ The King Hospital                         |  | No. 18 Emeka Abalu Ave. Phase 6, Trans Ekulu, Enugu            | Enugu East  | Enugu |
| 1696 | EN/0006 | EN/0006/S/1  | Christ The King Hospital                         |  | No. 18 Emeka Abalu Ave. Phase 6, Trans Ekulu, Enugu            | Enugu East  | Enugu |
| 1697 | EN/0007 | EN/0007/S/2  | Peenok Medical Centre                            |  | 24, Zik Avenue, Uwani, Enugu                                   | Enugu South | Enugu |
| 1698 | EN/0007 | EN/0007/S/3  | Peenok Medical Centre                            |  | 24, Zik Avenue, Uwani, Enugu                                   | Enugu South | Enugu |
| 1699 | EN/0008 | EN/0008/S/6  | Dr. Nlogha Okeke Memorial Foundation, Enugu.     |  | 30, Amigbo Lane Uwani, Enugu                                   | Enugu South | Enugu |
| 1700 | EN/0008 | EN/0008/S/14 | Dr. Nlogha Okeke Memorial Foundation, Enugu.     |  | 30, Amigbo Lane Uwani, Enugu                                   | Enugu South | Enugu |
| 1701 | EN/0008 | EN/0008/S/15 | Dr. Nlogha Okeke Memorial Foundation, Enugu.     |  | 30, Amigbo Lane Uwani, Enugu                                   | Enugu South | Enugu |
| 1702 | EN/0008 | EN/0008/S/8  | Dr. Nlogha Okeke Memorial Foundation, Enugu.     |  | 30, Amigbo Lane Uwani, Enugu                                   | Enugu South | Enugu |
| 1703 | EN/0008 | EN/0008/S/2  | Dr. Nlogha Okeke Memorial Foundation, Enugu.     |  | 30, Amigbo Lane Uwani, Enugu                                   | Enugu South | Enugu |
| 1704 | EN/0008 | EN/0008/S/3  | Dr. Nlogha Okeke Memorial Foundation, Enugu.     |  | 30, Amigbo Lane Uwani, Enugu                                   | Enugu South | Enugu |
| 1705 | EN/0008 | EN/0008/S/1  | Dr. Nlogha Okeke Memorial Foundation, Enugu.     |  | 30, Amigbo Lane Uwani, Enugu                                   | Enugu South | Enugu |
| 1706 | EN/0008 | EN/0008/S/4  | Dr. Nlogha Okeke Memorial Foundation, Enugu.     |  | 30, Amigbo Lane Uwani, Enugu                                   | Enugu South | Enugu |
| 1707 | EN/0008 | EN/0008/S/5  | Dr. Nlogha Okeke Memorial Foundation, Enugu.     |  | 30, Amigbo Lane Uwani, Enugu                                   | Enugu South | Enugu |
| 1708 | EN/0009 | EN/0009/S/3  | Jeno Hospital Ltd.                               |  | 23 Nnamdi Azikiwe Avenue, Trans-Ekulu, Enugu                   | Enugu East  | Enugu |
| 1709 | EN/0013 | EN/0013/S/3  | Ristela Hospital & Maternity                     |  | 3, Ristela Close, Independence Layout, Off Residential Road, E | Enugu East  | Enugu |
| 1710 | EN/0016 | EN/0016/S/15 | Ntasiobi Hospital,                               |  | Enugu                                                          | Enugu South | Enugu |
| 1711 | EN/0016 | EN/0016/S/2  | Ntasiobi Hospital,                               |  | Enugu                                                          | Enugu South | Enugu |
| 1712 | EN/0016 | EN/0016/S/10 | Ntasiobi Hospital,                               |  | Enugu                                                          | Enugu South | Enugu |
| 1713 | EN/0016 | EN/0016/S/6  | Ntasiobi Hospital,                               |  | Enugu                                                          | Enugu South | Enugu |
| 1714 | EN/0016 | EN/0016/S/4  | Ntasiobi Hospital,                               |  | Enugu                                                          | Enugu South | Enugu |
| 1715 | EN/0016 | EN/0016/S/8  | Ntasiobi Hospital,                               |  | Enugu                                                          | Enugu South | Enugu |
| 1716 | EN/0016 | EN/0016/S/14 | Ntasiobi Hospital,                               |  | Enugu                                                          | Enugu South | Enugu |
| 1717 | EN/0016 | EN/0016/S/1  | Ntasiobi Hospital,                               |  | Enugu                                                          | Enugu South | Enugu |
| 1718 | EN/0016 | EN/0016/S/3  | Ntasiobi Hospital,                               |  | Enugu                                                          | Enugu South | Enugu |
| 1719 | EN/0016 | EN/0016/S/5  | Ntasiobi Hospital,                               |  | Enugu                                                          | Enugu South | Enugu |
| 1720 | EN/0017 | EN/0017/S/4  | Akulue Memorial Hospital                         |  | 16/18 Akulue Road, Onuiyi, Nsukka, Enugu                       | Nsukka      | Enugu |
| 1721 | EN/0018 | EN/0018/S/2  | Unity Ngwo Hospital & Mat.                       |  | Ngwo, Enugu, Enugu State                                       | Udi         | Enugu |
| 1722 | EN/0018 | EN/0018/S/3  | Unity Ngwo Hospital & Mat.                       |  | Ngwo, Enugu, Enugu State                                       | Udi         | Enugu |
| 1723 | EN/0025 | EN/0025/S/3  | Ibezim Medical Clinics                           |  | 56, Ufuma Street, Achara Layout, Enugu                         | Enugu South | Enugu |
| 1724 | EN/0026 | EN/0026/S/3  | Kenechukwu Specialist Hospital & Maternity       |  | 94, Nike Road, Abakpa, Enugu State                             | Enugu East  | Enugu |
| 1725 | EN/0026 | EN/0026/S/5  | Kenechukwu Specialist Hospital & Maternity       |  | 94, Nike Road, Abakpa, Enugu State                             | Enugu East  | Enugu |
| 1726 | EN/0027 | EN/0027/S/3  | Julius Ezenyirioha Memorial Hospital & Maternity |  | 32, Nike Road, Abakpa Nike, Enugu.                             | Enugu East  | Enugu |
| 1727 | EN/0027 | EN/0027/S/5  | Julius Ezenyirioha Memorial Hospital & Maternity |  | 32, Nike Road, Abakpa Nike, Enugu.                             | Enugu East  | Enugu |
| 1728 | EN/0029 | EN/0029/S/1  | St. Leo's Specialist Hospital                    |  | Nike Lake Road, Abakpa, Enugu                                  | Enugu East  | Enugu |
| 1729 | EN/0034 | EN/0034/S/1  | The Merken Hospital Centre                       |  | Amechi Road, Awkunanaw, Enugu                                  | Enugu South | Enugu |
| 1730 | EN/0034 | EN/0034/S/3  | The Merken Hospital Centre                       |  | Amechi Road, Awkunanaw, Enugu                                  | Enugu South | Enugu |
| 1731 | EN/0037 | EN/0037/S/1  | Royal Hospital                                   |  | 3 Aria Road, Gra, Enugu                                        | Enugu East  | Enugu |
| 1732 | EN/0037 | EN/0037/S/2  | Royal Hospital                                   |  | 3 Aria Road, Gra, Enugu                                        | Enugu East  | Enugu |
| 1733 | EN/0037 | EN/0037/S/5  | Royal Hospital                                   |  | 3 Aria Road, Gra, Enugu                                        | Enugu East  | Enugu |



|      |         |              |                                  |                                                                                                                                                                                            |                                               |             |       |
|------|---------|--------------|----------------------------------|--------------------------------------------------------------------------------------------------------------------------------------------------------------------------------------------|-----------------------------------------------|-------------|-------|
| 1734 | EN/0042 | EN/0042/S/4  | Annuciation Hospital             |                                                                                                                                                                                            | Emene, Enugu.                                 | Aninri      | Enugu |
| 1735 | EN/0042 | EN/0042/S/1  | Annuciation Hospital             |                                                                                                                                                                                            | Emene, Enugu.                                 | Aninri      | Enugu |
| 1736 | EN/0042 | EN/0042/S/2  | Annuciation Hospital             |                                                                                                                                                                                            | Emene, Enugu.                                 | Aninri      | Enugu |
| 1737 | EN/0042 | EN/0042/S/3  | Annuciation Hospital             |                                                                                                                                                                                            | Emene, Enugu.                                 | Aninri      | Enugu |
| 1738 | EN/0042 | EN/0042/S/15 | Annuciation Hospital             |                                                                                                                                                                                            | Emene, Enugu.                                 | Aninri      | Enugu |
| 1739 | EN/0042 | EN/0042/S/14 | Annuciation Hospital             |                                                                                                                                                                                            | Emene, Enugu.                                 | Aninri      | Enugu |
| 1740 | EN/0042 | EN/0042/S/12 | Annuciation Hospital             |                                                                                                                                                                                            | Emene, Enugu.                                 | Aninri      | Enugu |
| 1741 | EN/0042 | EN/0042/S/6  | Annuciation Hospital             |                                                                                                                                                                                            | Emene, Enugu.                                 | Aninri      | Enugu |
| 1742 | EN/0042 | EN/0042/S/8  | Annuciation Hospital             |                                                                                                                                                                                            | Emene, Enugu.                                 | Aninri      | Enugu |
| 1743 | EN/0042 | EN/0042/S/5  | Annuciation Hospital             |                                                                                                                                                                                            | Emene, Enugu.                                 | Aninri      | Enugu |
| 1744 | EN/0044 | EN/0044/S/13 | ESUT Teaching Hospital, Parklane |                                                                                                                                                                                            | G R A, Enugu                                  | Enugu East  | Enugu |
| 1745 | EN/0044 | EN/0044/S/15 | ESUT Teaching Hospital, Parklane |                                                                                                                                                                                            | G R A, Enugu                                  | Enugu East  | Enugu |
| 1746 | EN/0044 | EN/0044/S/5  | ESUT Teaching Hospital, Parklane |                                                                                                                                                                                            | G R A, Enugu                                  | Enugu East  | Enugu |
| 1747 | EN/0044 | EN/0044/S/4  | ESUT Teaching Hospital, Parklane |                                                                                                                                                                                            | G R A, Enugu                                  | Enugu East  | Enugu |
| 1748 | EN/0044 | EN/0044/S/11 | ESUT Teaching Hospital, Parklane |                                                                                                                                                                                            | G R A, Enugu                                  | Enugu East  | Enugu |
| 1749 | EN/0044 | EN/0044/S/3  | ESUT Teaching Hospital, Parklane |                                                                                                                                                                                            | G R A, Enugu                                  | Enugu East  | Enugu |
| 1750 | EN/0044 | EN/0044/S/6  | ESUT Teaching Hospital, Parklane |                                                                                                                                                                                            | G R A, Enugu                                  | Enugu East  | Enugu |
| 1751 | EN/0044 | EN/0044/S/7  | ESUT Teaching Hospital, Parklane |                                                                                                                                                                                            | G R A, Enugu                                  | Enugu East  | Enugu |
| 1752 | EN/0044 | EN/0044/S/12 | ESUT Teaching Hospital, Parklane |                                                                                                                                                                                            | G R A, Enugu                                  | Enugu East  | Enugu |
| 1753 | EN/0044 | EN/0044/S/1  | ESUT Teaching Hospital, Parklane |                                                                                                                                                                                            | G R A, Enugu                                  | Enugu East  | Enugu |
| 1754 | EN/0044 | EN/0044/S/2  | ESUT Teaching Hospital, Parklane |                                                                                                                                                                                            | G R A, Enugu                                  | Enugu East  | Enugu |
| 1755 | EN/0044 | EN/0044/S/10 | ESUT Teaching Hospital, Parklane |                                                                                                                                                                                            | G R A, Enugu                                  | Enugu East  | Enugu |
| 1756 | EN/0046 | EN/0046/S/5  | Orakwue Hospital                 |                                                                                                                                                                                            | 16 Affa Street, Uwani, Enugu                  | Enugu South | Enugu |
| 1757 | EN/0046 | EN/0046/S/7  | Orakwue Hospital                 |                                                                                                                                                                                            | 16 Affa Street, Uwani, Enugu                  | Enugu South | Enugu |
| 1758 | EN/0046 | EN/0046/S/2  | Orakwue Hospital                 |                                                                                                                                                                                            | 16 Affa Street, Uwani, Enugu                  | Enugu South | Enugu |
| 1759 | EN/0053 | EN/0053/S    | St. Leo's Hospital               | General surgery, O & G                                                                                                                                                                     | 57, Nike Lake Road (Opp. Amazing Love Church) | Enugu East  | Enugu |
| 1760 | EN/0053 | EN/0053/S/3  | St. Leo's Hospital               | General surgery, O & G                                                                                                                                                                     | 57, Nike Lake Road (Opp. Amazing Love Church) | Enugu East  | Enugu |
| 1761 | EN/0057 | EN/0057/S/11 | Parklane Specialist Hospital     | Otolaryngology, Dentist, Dermatology, Physiotherapy, Orthopaedic, Radiology, Paediatrics, O&G, Int. med., Gen. surg., Urology, Pharm., Lab., Ophthalmology, Diabetes, Nutrition, Optometry | Enugu, Enugu State                            | Aninri      | Enugu |
| 1762 | EN/0057 | EN/0057/S/10 | Parklane Specialist Hospital     | Otolaryngology, Dentist, Dermatology, Physiotherapy, Orthopaedic, Radiology, Paediatrics, O&G, Int. med., Gen. surg., Urology, Pharm., Lab., Ophthalmology, Diabetes, Nutrition, Optometry | Enugu, Enugu State                            | Aninri      | Enugu |

|      |         |             |                              |                                                                                                                                                                                                                                |                    |        |       |
|------|---------|-------------|------------------------------|--------------------------------------------------------------------------------------------------------------------------------------------------------------------------------------------------------------------------------|--------------------|--------|-------|
| 1763 | EN/0057 | EN/0057/S/7 | Parklane Specialist Hospital | Otolaryngology,<br>Dentist,<br>Dermatology,<br>Physiotherapy,<br>Orthopaedic,<br>Radiology,<br>Paediatrics, O&G,<br>Int. med., Gen. surg., Urology,<br>Pharm., Lab.,<br>Ophthalmology,<br>Diabetes,<br>Nutrition,<br>Optometry | Enugu, Enugu State | Aninri | Enugu |
| 1764 | EN/0057 | EN/0057/S/6 | Parklane Specialist Hospital | Otolaryngology,<br>Dentist,<br>Dermatology,<br>Physiotherapy,<br>Orthopaedic,<br>Radiology,<br>Paediatrics, O&G,<br>Int. med., Gen. surg., Urology,<br>Pharm., Lab.,<br>Ophthalmology,<br>Diabetes,<br>Nutrition,<br>Optometry | Enugu, Enugu State | Aninri | Enugu |
| 1765 | EN/0057 | EN/0057/S/3 | Parklane Specialist Hospital | Otolaryngology,<br>Dentist,<br>Dermatology,<br>Physiotherapy,<br>Orthopaedic,<br>Radiology,<br>Paediatrics, O&G,<br>Int. med., Gen. surg., Urology,<br>Pharm., Lab.,<br>Ophthalmology,<br>Diabetes,<br>Nutrition,<br>Optometry | Enugu, Enugu State | Aninri | Enugu |
| 1766 | EN/0057 | EN/0057/S/2 | Parklane Specialist Hospital | Otolaryngology,<br>Dentist,<br>Dermatology,<br>Physiotherapy,<br>Orthopaedic,<br>Radiology,<br>Paediatrics, O&G,<br>Int. med., Gen. surg., Urology,<br>Pharm., Lab.,<br>Ophthalmology,<br>Diabetes,<br>Nutrition,<br>Optometry | Enugu, Enugu State | Aninri | Enugu |
| 1767 | EN/0057 | EN/0057/S/1 | Parklane Specialist Hospital | Otolaryngology,<br>Dentist,<br>Dermatology,<br>Physiotherapy,<br>Orthopaedic,<br>Radiology,<br>Paediatrics, O&G,<br>Int. med., Gen. surg., Urology,<br>Pharm., Lab.,<br>Ophthalmology,<br>Diabetes,<br>Nutrition,<br>Optometry | Enugu, Enugu State | Aninri | Enugu |
| 1768 | EN/0057 | EN/0057/S/4 | Parklane Specialist Hospital | Otolaryngology,<br>Dentist,<br>Dermatology,<br>Physiotherapy,<br>Orthopaedic,<br>Radiology,<br>Paediatrics, O&G,<br>Int. med., Gen. surg., Urology,<br>Pharm., Lab.,<br>Ophthalmology,<br>Diabetes,<br>Nutrition,<br>Optometry | Enugu, Enugu State | Aninri | Enugu |

|      |         |              |                                  |                                                                                                                                                                                            |                                                  |            |       |
|------|---------|--------------|----------------------------------|--------------------------------------------------------------------------------------------------------------------------------------------------------------------------------------------|--------------------------------------------------|------------|-------|
| 1769 | EN/0057 | EN/0057/S/5  | Parklane Specialist Hospital     | Otolaryngology, Dentist, Dermatology, Physiotherapy, Orthopaedic, Radiology, Paediatrics, O&G, Int. med., Gen. surg., Urology, Pharm., Lab., Ophthalmology, Diabetes, Nutrition, Optometry | Enugu, Enugu State                               | Aninri     | Enugu |
| 1770 | EN/0057 | EN/0057/S/15 | Parklane Specialist Hospital     | Otolaryngology, Dentist, Dermatology, Physiotherapy, Orthopaedic, Radiology, Paediatrics, O&G, Int. med., Gen. surg., Urology, Pharm., Lab., Ophthalmology, Diabetes, Nutrition, Optometry | Enugu, Enugu State                               | Aninri     | Enugu |
| 1771 | EN/0057 | EN/0057/S/8  | Parklane Specialist Hospital     | Otolaryngology, Dentist, Dermatology, Physiotherapy, Orthopaedic, Radiology, Paediatrics, O&G, Int. med., Gen. surg., Urology, Pharm., Lab., Ophthalmology, Diabetes, Nutrition, Optometry | Enugu, Enugu State                               | Aninri     | Enugu |
| 1772 | EN/0057 | EN/0057/S/13 | Parklane Specialist Hospital     | Otolaryngology, Dentist, Dermatology, Physiotherapy, Orthopaedic, Radiology, Paediatrics, O&G, Int. med., Gen. surg., Urology, Pharm., Lab., Ophthalmology, Diabetes, Nutrition, Optometry | Enugu, Enugu State                               | Aninri     | Enugu |
| 1773 | EN/0057 | EN/0057/S    | Parklane Specialist Hospital     | Otolaryngology, Dentist, Dermatology, Physiotherapy, Orthopaedic, Radiology, Paediatrics, O&G, Int. med., Gen. surg., Urology, Pharm., Lab., Ophthalmology, Diabetes, Nutrition, Optometry | Enugu, Enugu State                               | Aninri     | Enugu |
| 1774 | EN/0068 | EN/0068/S/3  | Hanlett Patterson Medical Clinic | O & G                                                                                                                                                                                      | West Road, 6 Trans-Ekulu Road Enugu, Enugu State | Aninri     | Enugu |
| 1775 | EN/0073 | EN/0073/S/5  | National Orthopaedic Hospital    | Orthopaedics, Burns & Plastics, Physiotherapy, Radiology, Laboratory, Pharmacy, Traumatology, Surgery, Prosthetics/orthotics                                                               | Enugu                                            | Enugu East | Enugu |
| 1776 | EN/0078 | EN/0078/S/4  | IVY Pharm.                       | Pharmacy                                                                                                                                                                                   | NAGPP, 44, Chime Road                            | Aninri     | Enugu |
| 1777 | EN/0079 | EN/0079/S/4  | Daisy Pharmacy Ltd.              | Pharmacy                                                                                                                                                                                   | 49, Zik Avenue, Enugu                            | Aninri     | Enugu |

|      |         |              |                                                              |            |                                  |                |       |
|------|---------|--------------|--------------------------------------------------------------|------------|----------------------------------|----------------|-------|
| 1778 | EN/0081 | EN/0081/S/4  | Ndu Pharmacy/Dunix Ltd.                                      | Pharmacy   | 147, Zik Avenue, Uwani, Enugu    | Enugu South    | Enugu |
| 1779 | EN/0084 | EN/0084/S    | KOV Pharmacy                                                 | Pharmacy   | 57, Nike Road, Abakpa, Enugu     | Enugu East     | Enugu |
| 1780 | EN/0085 | EN/0085/S/4  | Elofex Pharmacy                                              | Pharmacy   | Tracas Road, Nsukka, Enugu State | Abeokuta South | Ogun  |
| 1781 | EN/0092 | EN/0092/S/4  | Annox Nig. Ltd. Pharm. & Stores                              | Pharmacy   | 1B UNTH Road, Enugu              | Enugu North    | Enugu |
| 1782 | EN/0099 | EN/0099/S/5  | St. Lukkis Lab.                                              | Laboratory | 79 Nike Road, Nike Abakpa, Enugu | Enugu East     | Enugu |
| 1783 | EN/0100 | EN/0100/S    | Peenok Med. Centre                                           | Laboratory | 24, Zik Ave. Uwani Enugu         | Enugu South    | Enugu |
| 1784 | EN/0102 | EN/0102/S/12 | University Of Nigeria Teaching Hosp., Enugu                  |            | Enugu                            | Enugu North    | Enugu |
| 1785 | EN/0102 | EN/0102/S/3  | University Of Nigeria Teaching Hosp., Enugu                  |            | Enugu                            | Enugu North    | Enugu |
| 1786 | EN/0102 | EN/0102/S/2  | University Of Nigeria Teaching Hosp., Enugu                  |            | Enugu                            | Enugu North    | Enugu |
| 1787 | EN/0102 | EN/0102/S/15 | University Of Nigeria Teaching Hosp., Enugu                  |            | Enugu                            | Enugu North    | Enugu |
| 1788 | EN/0102 | EN/0102/S/14 | University Of Nigeria Teaching Hosp., Enugu                  |            | Enugu                            | Enugu North    | Enugu |
| 1789 | EN/0102 | EN/0102/S/8  | University Of Nigeria Teaching Hosp., Enugu                  |            | Enugu                            | Enugu North    | Enugu |
| 1790 | EN/0102 | EN/0102/S/11 | University Of Nigeria Teaching Hosp., Enugu                  |            | Enugu                            | Enugu North    | Enugu |
| 1791 | EN/0102 | EN/0102/S/10 | University Of Nigeria Teaching Hosp., Enugu                  |            | Enugu                            | Enugu North    | Enugu |
| 1792 | EN/0102 | EN/0102/S/4  | University Of Nigeria Teaching Hosp., Enugu                  |            | Enugu                            | Enugu North    | Enugu |
| 1793 | EN/0102 | EN/0102/S/5  | University Of Nigeria Teaching Hosp., Enugu                  |            | Enugu                            | Enugu North    | Enugu |
| 1794 | EN/0111 | EN/0111/S/2  | Cottage Hospital/Comprehensive Health Centre, Police Detecti |            | Police Detective College, Enugu  | Enugu North    | Enugu |
| 1795 | EN/0111 | EN/0111/S/5  | Cottage Hospital/Comprehensive Health Centre, Police Detecti |            | Police Detective College, Enugu  | Enugu North    | Enugu |
| 1796 | EN/0113 | EN/0113/S/4  | National Orthopaedic Hospital                                |            | Enugu, Enugu State               | Enugu East     | Enugu |
| 1797 | EN/0113 | EN/0113/S/10 | National Orthopaedic Hospital                                |            | Enugu, Enugu State               | Enugu East     | Enugu |
| 1798 | EN/0113 | EN/0113/S/1  | National Orthopaedic Hospital                                |            | Enugu, Enugu State               | Enugu East     | Enugu |
| 1799 | EN/0113 | EN/0113/S/11 | National Orthopaedic Hospital                                |            | Enugu, Enugu State               | Enugu East     | Enugu |
| 1800 | EN/0113 | EN/0113/S/7  | National Orthopaedic Hospital                                |            | Enugu, Enugu State               | Enugu East     | Enugu |
| 1801 | EN/0116 | EN/0116/S/4  | UNN Medical Centre, Enugu                                    |            | UNEC, Enugu Campus               | Enugu North    | Enugu |
| 1802 | EN/0117 | EN/0117/S/4  | Nigeria Law School Medical Centre                            |            | Agani Town, Enugu                | Nkanu West     | Enugu |
| 1803 | EN/0118 | EN/0118/S/14 | All Saints Medical Centre                                    |            | 7 Edemani Road, Nsukka           | Nsukka         | Enugu |
| 1804 | EN/0118 | EN/0118/S/1  | All Saints Medical Centre                                    |            | 7 Edemani Road, Nsukka           | Nsukka         | Enugu |
| 1805 | EN/0118 | EN/0118/S/5  | All Saints Medical Centre                                    |            | 7 Edemani Road, Nsukka           | Nsukka         | Enugu |
| 1806 | EN/0119 | EN/0119/S/4  | University of Nigeria, Nsukka Medical Centre                 |            | Nsukka, Enugu State              | Nsukka         | Enugu |
| 1807 | EN/0119 | EN/0119/S/2  | University of Nigeria, Nsukka Medical Centre                 |            | Nsukka, Enugu State              | Nsukka         | Enugu |
| 1808 | EN/0119 | EN/0119/S/14 | University of Nigeria, Nsukka Medical Centre                 |            | Nsukka, Enugu State              | Nsukka         | Enugu |
| 1809 | EN/0119 | EN/0119/S/3  | University of Nigeria, Nsukka Medical Centre                 |            | Nsukka, Enugu State              | Nsukka         | Enugu |
| 1810 | EN/0119 | EN/0119/S/5  | University of Nigeria, Nsukka Medical Centre                 |            | Nsukka, Enugu State              | Nsukka         | Enugu |

|      |         |              |                                     |                                                                                              |                                          |             |       |
|------|---------|--------------|-------------------------------------|----------------------------------------------------------------------------------------------|------------------------------------------|-------------|-------|
| 1811 | EN/0122 | EN/0122/S/5  | Edn Diagnostic Laboratory           | Laboratory                                                                                   | 135 Agbani Road, Uwani, Enugu            | Enugu South | Enugu |
| 1812 | EN/0126 | EN/0126/S/7  | UNN Medical Centre                  | Radiodiagnostic/Ultrasonography, Physiotherapy, Internal Medicine, O&G, Laboratory, Pharmacy | Nsukka                                   | Nsukka      | Enugu |
| 1813 | EN/0126 | EN/0126/S/11 | UNN Medical Centre                  | Radiodiagnostic/Ultrasonography, Physiotherapy, Internal Medicine, O&G, Laboratory, Pharmacy | Nsukka                                   | Nsukka      | Enugu |
| 1814 | EN/0126 | EN/0126/S/5  | UNN Medical Centre                  | Radiodiagnostic/Ultrasonography, Physiotherapy, Internal Medicine, O&G, Laboratory, Pharmacy | Nsukka                                   | Nsukka      | Enugu |
| 1815 | EN/0126 | EN/0126/S/4  | UNN Medical Centre                  | Radiodiagnostic/Ultrasonography, Physiotherapy, Internal Medicine, O&G, Laboratory, Pharmacy | Nsukka                                   | Nsukka      | Enugu |
| 1816 | EN/0126 | EN/0126/S/3  | UNN Medical Centre                  | Radiodiagnostic/Ultrasonography, Physiotherapy, Internal Medicine, O&G, Laboratory, Pharmacy | Nsukka                                   | Nsukka      | Enugu |
| 1817 | EN/0126 | EN/0126/S/2  | UNN Medical Centre                  | Radiodiagnostic/Ultrasonography, Physiotherapy, Internal Medicine, O&G, Laboratory, Pharmacy | Nsukka                                   | Nsukka      | Enugu |
| 1818 | EN/0127 | EN/0127/S/4  | Braunx Pharmaceuticals              | Pharmacy                                                                                     | No 138 Upper Chime Ave New Haven Enugu   | Enugu South | Enugu |
| 1819 | EN/0128 | EN/0128/S/4  | Deco Pharmacy Ltd                   | Pharmacy                                                                                     | No 29 Edinburgh Rd Ogui New Layout Enugu | Enugu South | Enugu |
| 1820 | EN/0131 | EN/0131/S/4  | Afrique Concept Ltd Pharmaceuticals | Pharmacy                                                                                     | No 26 Okpara Ave Enugu                   | Enugu North | Enugu |
| 1821 | EN/0132 | EN/0132/S/4  | Royale Pharmacy                     | Pharmacy                                                                                     | S1/S2 Dhamija Road Trans Ekulu Enugu     | Enugu East  | Enugu |
| 1822 | EN/0133 | EN/0133/S/4  | Uncle Ben Pharmacy Ltd              | Pharmacy                                                                                     | No 55 Amuri Road Abakpa Enugu            | Enugu East  | Enugu |
| 1823 | EN/0137 | EN/0137/S/4  | Gredel Pharmacy                     | Pharmacy                                                                                     | No 28 UNTH Road Enugu                    | Enugu North | Enugu |
| 1824 | EN/0141 | EN/0141/S/7  | All Saints Medical Centre           | Radio-Diagnostic/Ultrasonograph, General Surgery, Laboratory                                 | 2 Ogurugu Road, Odenigbo, Nsukka         | Nsukka      | Enugu |
| 1825 | EN/0141 | EN/0141/S/1  | All Saints Medical Centre           | Radio-Diagnostic/Ultrasonograph, General Surgery, Laboratory                                 | 2 Ogurugu Road, Odenigbo, Nsukka         | Nsukka      | Enugu |
| 1826 | EN/0143 | EN/0143/S/1  | Trans Ekulu Hospital                | General Surgery                                                                              | No 21 Nome drive Trans Ekulu             | Enugu East  | Enugu |
| 1827 | EN/0148 | EN/0148/S/4  | Modern Pharmacy                     | Pharmacy                                                                                     | No 1 Nome Drive Trans Ekulu Enugu        | Enugu East  | Enugu |
| 1828 | EN/0150 | EN/0150/S/5  | St Patricks Hospital                | Paediatrics, Laboratory, Pharmacy, Internal Medicine                                         | 8 Owerri Road, Asata, Enugu              | Enugu South | Enugu |
| 1829 | EN/0150 | EN/0150/S/2  | St Patricks Hospital                | Paediatrics, Laboratory, Pharmacy, Internal Medicine                                         | 8 Owerri Road, Asata, Enugu              | Enugu South | Enugu |
| 1830 | EN/0150 | EN/0150/S/4  | St Patricks Hospital                | Paediatrics, Laboratory, Pharmacy, Internal Medicine                                         | 8 Owerri Road, Asata, Enugu              | Enugu South | Enugu |
| 1831 | EN/0150 | EN/0150/S/6  | St Patricks Hospital                | Paediatrics, Laboratory, Pharmacy, Internal Medicine                                         | 8 Owerri Road, Asata, Enugu              | Enugu South | Enugu |
| 1832 | EN/0155 | EN/0155/S/5  | EM Medical Lab. Services            | Laboratory                                                                                   | 135, Agbani Road, Enugu State            | Enugu North | Enugu |

|      |         |              |                                         |                                                       |                                           |             |       |
|------|---------|--------------|-----------------------------------------|-------------------------------------------------------|-------------------------------------------|-------------|-------|
| 1833 | EN/0159 | EN/0159/S/4  | Godini Pharmacy                         | Pharmacy                                              | No. 2B UNTH Road, Enugu                   | Enugu North | Enugu |
| 1834 | EN/0160 | EN/0160/S/7  | Niger Foundation Hospital               | Laboratory, Pharmacy, Radiodiagnostic/Ultrasonography | off Presidential Road, Enugu State        | Enugu East  | Enugu |
| 1835 | EN/0160 | EN/0160/S/4  | Niger Foundation Hospital               | Laboratory, Pharmacy, Radiodiagnostic/Ultrasonography | off Presidential Road, Enugu State        | Enugu East  | Enugu |
| 1836 | EN/0160 | EN/0160/S/5  | Niger Foundation Hospital               | Laboratory, Pharmacy, Radiodiagnostic/Ultrasonography | off Presidential Road, Enugu State        | Enugu East  | Enugu |
| 1837 | EN/0161 | EN/0161/S/4  | Goldern Pharmacy                        | Pharmacy                                              | 31 Nike Road, Abakpa, Enugu               | Enugu East  | Enugu |
| 1838 | EN/0162 | EN/0162/S/4  | Klinimed Pharmaceuticals                | Pharmacy                                              | 14 College Road, Abakpa, Enugu            | Enugu East  | Enugu |
| 1839 | EN/0164 | EN/0164/S/6  | Mother of Christ Specialist Hospital    |                                                       | Ogui, Enugu State                         | Enugu North | Enugu |
| 1840 | EN/0164 | EN/0164/S/7  | Mother of Christ Specialist Hospital    |                                                       | Ogui, Enugu State                         | Enugu North | Enugu |
| 1841 | EN/0164 | EN/0164/S/2  | Mother of Christ Specialist Hospital    |                                                       | Ogui, Enugu State                         | Enugu North | Enugu |
| 1842 | EN/0164 | EN/0164/S/5  | Mother of Christ Specialist Hospital    |                                                       | Ogui, Enugu State                         | Enugu North | Enugu |
| 1843 | EN/0164 | EN/0164/S/1  | Mother of Christ Specialist Hospital    |                                                       | Ogui, Enugu State                         | Enugu North | Enugu |
| 1844 | EN/0164 | EN/0164/S/3  | Mother of Christ Specialist Hospital    |                                                       | Ogui, Enugu State                         | Enugu North | Enugu |
| 1845 | EN/0171 | EN/0171/S/4  | Federal College of Education, Eha-Amufu |                                                       | Eha-Amufu, Enugu State                    | Enugu North | Enugu |
| 1846 | EN/0175 | EN/0175/S/1  | THE GOOD SHEPHERD SPECIALIST HOSPITAL   |                                                       | CHRIST CHURCH STREET, UWANI               | Enugu South | Enugu |
| 1847 | EN/0175 | EN/0175/S/2  | THE GOOD SHEPHERD SPECIALIST HOSPITAL   |                                                       | CHRIST CHURCH STREET, UWANI               | Enugu South | Enugu |
| 1848 | EN/0175 | EN/0175/S/3  | THE GOOD SHEPHERD SPECIALIST HOSPITAL   |                                                       | CHRIST CHURCH STREET, UWANI               | Enugu South | Enugu |
| 1849 | EN/0175 | EN/0175/S/4  | THE GOOD SHEPHERD SPECIALIST HOSPITAL   |                                                       | CHRIST CHURCH STREET, UWANI               | Enugu South | Enugu |
| 1850 | EN/0175 | EN/0175/S/6  | THE GOOD SHEPHERD SPECIALIST HOSPITAL   |                                                       | CHRIST CHURCH STREET, UWANI               | Enugu South | Enugu |
| 1851 | EN/0175 | EN/0175/S/5  | THE GOOD SHEPHERD SPECIALIST HOSPITAL   |                                                       | CHRIST CHURCH STREET, UWANI               | Enugu South | Enugu |
| 1852 | EN/0190 | EN/0190/S/7  | Nigerian Railway Clinic. Enugu          |                                                       | Railway Compound, Western Avenue, Enugu   | Enugu North | Enugu |
| 1853 | EN/0192 | EN/0192/S/8  | Samaks Maxilofacial & Dental Clinic     | Dental                                                | 77 Zik Avenue, Uwani, Enugu               | Enugu North | Enugu |
| 1854 | EN/0196 | EN/0196/S/4  | Adonai Stelmon Medical Laboratory       | Pharmacy                                              | 63 Chime Avenue, New Haven Enugu          | Enugu South | Enugu |
| 1855 | EN/0198 | EN/0198/S/3  | Semino Clinic                           | O&G, Laboratory                                       | 8 Onuayo Street Enugu                     | Enugu East  | Enugu |
| 1856 | EN/0198 | EN/0198/S/5  | Semino Clinic                           | O&G, Laboratory                                       | 8 Onuayo Street Enugu                     | Enugu East  | Enugu |
| 1857 | EN/0201 | EN/0201/S/3  | Chigozie Hospital & Maternity           |                                                       | 11 Ekwulu Lane, Emene                     | Enugu South | Enugu |
| 1858 | EN/0208 | EN/0208/S/6  | Chidike Children Specialist Clinic      |                                                       | 57 Nike Abakpa, Nike, Enugu               | Enugu East  | Enugu |
| 1859 | EN/0210 | EN/0210/S/8  | First Dental Consultant                 | Dental                                                | 184 Ogui Road, Lagos Street, Asata, Enugu | Enugu North | Enugu |
| 1860 | EN/0215 | EN/0215/S/8  | Dentaserve Dental Clinic                | Dental                                                | 20 Ekulu Avenue, GRA, Enugu               | Enugu North | Enugu |
| 1861 | EN/0216 | EN/0216/S/15 | St Mary's Hospital and Maternity        |                                                       | 16 Nwodo Close, GRA, Enugu                | Enugu North | Enugu |
| 1862 | EN/0216 | EN/0216/S/6  | St Mary's Hospital and Maternity        |                                                       | 16 Nwodo Close, GRA, Enugu                | Enugu North | Enugu |
| 1863 | EN/0216 | EN/0216/S/5  | St Mary's Hospital and Maternity        |                                                       | 16 Nwodo Close, GRA, Enugu                | Enugu North | Enugu |
| 1864 | EN/0216 | EN/0216/S/3  | St Mary's Hospital and Maternity        |                                                       | 16 Nwodo Close, GRA, Enugu                | Enugu North | Enugu |
| 1865 | EN/0216 | EN/0216/S/2  | St Mary's Hospital and Maternity        |                                                       | 16 Nwodo Close, GRA, Enugu                | Enugu North | Enugu |
| 1866 | EN/0216 | EN/0216/S/1  | St Mary's Hospital and Maternity        |                                                       | 16 Nwodo Close, GRA, Enugu                | Enugu North | Enugu |

|      |         |              |                                                        |  |                                                                                                        |             |       |
|------|---------|--------------|--------------------------------------------------------|--|--------------------------------------------------------------------------------------------------------|-------------|-------|
| 1867 | EN/0217 | EN/0217/S/4  | Bishop Shanahan Hospital                               |  | 46 Enugu Road, Nsukka                                                                                  | Nsukka      | Enugu |
| 1868 | EN/0217 | EN/0217/S/5  | Bishop Shanahan Hospital                               |  | 46 Enugu Road, Nsukka                                                                                  | Nsukka      | Enugu |
| 1869 | EN/0217 | EN/0217/S/1  | Bishop Shanahan Hospital                               |  | 46 Enugu Road, Nsukka                                                                                  | Nsukka      | Enugu |
| 1870 | EN/0217 | EN/0217/S/2  | Bishop Shanahan Hospital                               |  | 46 Enugu Road, Nsukka                                                                                  | Nsukka      | Enugu |
| 1871 | EN/0217 | EN/0217/S/3  | Bishop Shanahan Hospital                               |  | 46 Enugu Road, Nsukka                                                                                  | Nsukka      | Enugu |
| 1872 | EN/0218 | EN/0218/S/9  | Federal Neuropsychiatric Hospital                      |  | Chime Avenue, New Haven, PMB 01181, Enugu                                                              | Enugu North | Enugu |
| 1873 | EN/0218 | EN/0218/S/4  | Federal Neuropsychiatric Hospital                      |  | Chime Avenue, New Haven, PMB 01181, Enugu                                                              | Enugu North | Enugu |
| 1874 | EN/0218 | EN/0218/S/5  | Federal Neuropsychiatric Hospital                      |  | Chime Avenue, New Haven, PMB 01181, Enugu                                                              | Enugu North | Enugu |
| 1875 | EN/0223 | EN/0223/S/7  | Trisa Clinic and Radiological Services                 |  | C4 presidential road (former Golden Gate Independence layout Enugu.                                    | Enugu South | Enugu |
| 1876 | EN/0224 | EN/0224/S/7  | San Bernadine Clinic                                   |  | 10,Carter Street Ogue,Enugu State                                                                      | Enugu North | Enugu |
| 1877 | EN/0227 | EN/0227/S/5  | Lamb Of God Medical Lab                                |  | 191,Chime Avenue, Enugu State                                                                          | Enugu North | Enugu |
| 1878 | EN/0228 | EN/0228/S/18 | Alpha Specialist Hospital                              |  | NO.6/8 Third Avenue Trans-Ekulu,Enugu State                                                            | Enugu East  | Enugu |
| 1879 | EN/0229 | EN/0229/S/15 | Enugu Eye Clinics                                      |  | 1,Anyaeibunam Street Uwani,Enugu State                                                                 | Enugu South | Enugu |
| 1880 | EN/0231 | EN/0231/S/5  | Faith Foundation Hospital                              |  | 27B,Ogurugo Road Nsukka,Enugu State                                                                    | Nsukka      | Enugu |
| 1881 | EN/0231 | EN/0231/S/4  | Faith Foundation Hospital                              |  | 27B,Ogurugo Road Nsukka,Enugu State                                                                    | Nsukka      | Enugu |
| 1882 | EN/0232 | EN/0232/S/10 | City Clinics                                           |  | 10,Enweani Street,Opp New Haven Junction By Abakaliki Express Way, City Layout, New Haven, Enugu State | Enugu East  | Enugu |
| 1883 | EN/0233 | EN/0233/S/6  | Prime Life Medical                                     |  | 30A,Emeka Ebilla Lane Idaw River, Enugu State                                                          | Enugu South | Enugu |
| 1884 | EN/0234 | EN/0234/S/4  | Mark Twain Nig.Ltd                                     |  | 1,Unth Road, Enugu State                                                                               | Enugu North | Enugu |
| 1885 | EN/0238 | EN/0238/S/6  | Tendercare Hospital & Maternity                        |  | NO.5B Ezeji Close Ugboezechi,Abakpa,Enugu State                                                        | Enugu East  | Enugu |
| 1886 | EN/0239 | EN/0239/S/13 | Springfield Eyecare Centre                             |  | 200 Agbani Road,Enugu State                                                                            | Enugu South | Enugu |
| 1887 | EN/0240 | EN/0240/S/15 | The Eye Specialist Hospital                            |  | 11,Church View Ekulu West GRA,Enugu state                                                              | Enugu East  | Enugu |
| 1888 | EN/0241 | EN/0241/S/5  | Noble Laboratory Services                              |  | 6,Oceanic Avenue Off Presidential Road,Nkpor,Enugu State                                               | Enugu South | Enugu |
| 1889 | EN/0242 | EN/0242/S/3  | Jideofor Hospital                                      |  | Ikpenwa Flat N.A. Quarters Agwu,Enugu State                                                            | Awgu        | Enugu |
| 1890 | EN/0242 | EN/0242/S/1  | Jideofor Hospital                                      |  | Ikpenwa Flat N.A. Quarters Agwu,Enugu State                                                            | Awgu        | Enugu |
| 1891 | EN/0243 | EN/0243/S/4  | Renhoks Pharmaceuticals                                |  | 83,Park Avenue GRA, Enugu State                                                                        | Enugu North | Enugu |
| 1892 | EN/0244 | EN/0244/S/5  | Enugu State Uni Of Science &Tech (ESUT) Medical Centre |  | Agbani, Enugu State                                                                                    | Nkanu West  | Enugu |
| 1893 | EN/0245 | EN/0245/S/4  | Laddan Pharmacy                                        |  | 15/19 Atani Street Abakpa Enugu State                                                                  | Enugu East  | Enugu |
| 1894 | EN/0248 | EN/0248/S/5  | Calix Healthcare Ltd                                   |  | 10A Hill View Road, ESBS,                                                                              | Enugu North | Enugu |
| 1895 | EN/0248 | EN/0248/S/4  | Calix Healthcare Ltd                                   |  | 10A Hill View Road, ESBS,                                                                              | Enugu North | Enugu |
| 1896 | EN/0248 | EN/0248/S/6  | Calix Healthcare Ltd                                   |  | 10A Hill View Road, ESBS,                                                                              | Enugu North | Enugu |
| 1897 | EN/0249 | EN/0249/S/15 | The Eye Specialist Hospital                            |  | 282 Enugu Road, Ugwunkwo, Nsukka Enugu State                                                           | Nsukka      | Enugu |
| 1898 | EN/0250 | EN/0250/S/3  | Freedom Fertility Centre                               |  | No 6 Hill View Avenue, Independent Layout, Enugu, Enugu State                                          | Enugu North | Enugu |
| 1899 | EN/0250 | EN/0250/S/14 | Freedom Fertility Centre                               |  | No 6 Hill View Avenue, Independent Layout, Enugu, Enugu State                                          | Enugu North | Enugu |
| 1900 | EN/0250 | EN/0250/S/6  | Freedom Fertility Centre                               |  | No 6 Hill View Avenue, Independent Layout, Enugu, Enugu State                                          | Enugu North | Enugu |
| 1901 | EN/0250 | EN/0250/S/5  | Freedom Fertility Centre                               |  | No 6 Hill View Avenue, Independent Layout, Enugu, Enugu State                                          | Enugu North | Enugu |

|      |          |              |                                               |  |                                                               |             |       |
|------|----------|--------------|-----------------------------------------------|--|---------------------------------------------------------------|-------------|-------|
| 1902 | EN/0250  | EN/0250/S/4  | Freedom Fertility Centre                      |  | No 6 Hill View Avenue, Independent Layout, Enugu, Enugu State | Enugu North | Enugu |
| 1903 | EN/0250  | EN/0250/S/2  | Freedom Fertility Centre                      |  | No 6 Hill View Avenue, Independent Layout, Enugu, Enugu State | Enugu North | Enugu |
| 1904 | EN/0250  | EN/0250/S/1  | Freedom Fertility Centre                      |  | No 6 Hill View Avenue, Independent Layout, Enugu, Enugu State | Enugu North | Enugu |
| 1905 | EN/0251  | EN/0251/S/6  | Freedom Fertility Centre                      |  | No 6 Hill View Avenue, Independent Layout, Enugu, Enugu State | Enugu North | Enugu |
| 1906 | EN/0251  | EN/0251/S/4  | Freedom Fertility Centre                      |  | No 6 Hill View Avenue, Independent Layout, Enugu, Enugu State | Enugu North | Enugu |
| 1907 | EN/0251  | EN/0251/S/2  | Freedom Fertility Centre                      |  | No 6 Hill View Avenue, Independent Layout, Enugu, Enugu State | Enugu North | Enugu |
| 1908 | EN/0251  | EN/0251/S/1  | Freedom Fertility Centre                      |  | No 6 Hill View Avenue, Independent Layout, Enugu, Enugu State | Enugu North | Enugu |
| 1909 | EN/0251  | EN/0251/S/14 | Freedom Fertility Centre                      |  | No 6 Hill View Avenue, Independent Layout, Enugu, Enugu State | Enugu North | Enugu |
| 1910 | EN/0251  | EN/0251/S/5  | Freedom Fertility Centre                      |  | No 6 Hill View Avenue, Independent Layout, Enugu, Enugu State | Enugu North | Enugu |
| 1911 | EN/0251  | EN/0251/S/3  | Freedom Fertility Centre                      |  | No 6 Hill View Avenue, Independent Layout, Enugu, Enugu State | Enugu North | Enugu |
| 1912 | EN/0254  | EN/0254/S/3  | Christian Miracle Centre                      |  | 3 Akutu Crescent, , Independent Lay Out, Enugu State          | Enugu North | Enugu |
| 1913 | EN/0256  | EN/0256/S/7  | Choice Medical Centre                         |  | 1C Monrovia Street, New Heaven, Enugu State                   | Enugu North | Enugu |
| 1914 | EN/0256  | EN/0256/S/3  | Choice Medical Centre                         |  | 1C Monrovia Street, New Heaven, Enugu State                   | Enugu North | Enugu |
| 1915 | EN/0261  | EN/0261/S/8  | Kappa Dental Services                         |  | 6B Amawbia Close, New Heaven, Enugu, Enugu State              | Enugu North | Enugu |
| 1916 | EN/0263  | EN/0263/S/7  | Champion Diagnostics                          |  | 85 Nike Road, By Liberty Bus Stop Abakpa, Enugu State         | Awgu        | Enugu |
| 1917 | EN/0264  | EN/0264/S/6  | Favoured Child Clinics                        |  | 4 Jerry-Ugwu, Avenue, New Heaven Extension, Enugu State       | Enugu North | Enugu |
| 1918 | EN/0265  | EN/0265/S/5  | Mc Chucks Laboratory Services                 |  | 2 Ohafia/Nnaji Street, By Zik Avenue, Enugu, Enugu State      | Enugu South | Enugu |
| 1919 | FCT/0002 | FCT/0002/S/5 | Arewa Specialist Hospital & Diagnostic Centre |  | Plot 645, Alex Ekwueme Street, Jabi District, Abuja           | Municipal   | FCT   |
| 1920 | FCT/0002 | FCT/0002/S/3 | Arewa Specialist Hospital & Diagnostic Centre |  | Plot 645, Alex Ekwueme Street, Jabi District, Abuja           | Municipal   | FCT   |
| 1921 | FCT/0002 | FCT/0002/S/6 | Arewa Specialist Hospital & Diagnostic Centre |  | Plot 645, Alex Ekwueme Street, Jabi District, Abuja           | Municipal   | FCT   |
| 1922 | FCT/0002 | FCT/0002/S/2 | Arewa Specialist Hospital & Diagnostic Centre |  | Plot 645, Alex Ekwueme Street, Jabi District, Abuja           | Municipal   | FCT   |
| 1923 | FCT/0002 | FCT/0002/S/1 | Arewa Specialist Hospital & Diagnostic Centre |  | Plot 645, Alex Ekwueme Street, Jabi District, Abuja           | Municipal   | FCT   |
| 1924 | FCT/0004 | FCT/0004/S/2 | Gwarinpa General Hospital                     |  | Gwarinpa, Abuja                                               | Municipal   | FCT   |
| 1925 | FCT/0004 | FCT/0004/S/6 | Gwarinpa General Hospital                     |  | Gwarinpa, Abuja                                               | Municipal   | FCT   |
| 1926 | FCT/0004 | FCT/0004/S/5 | Gwarinpa General Hospital                     |  | Gwarinpa, Abuja                                               | Municipal   | FCT   |
| 1927 | FCT/0004 | FCT/0004/S/3 | Gwarinpa General Hospital                     |  | Gwarinpa, Abuja                                               | Municipal   | FCT   |
| 1928 | FCT/0004 | FCT/0004/S/4 | Gwarinpa General Hospital                     |  | Gwarinpa, Abuja                                               | Municipal   | FCT   |
| 1929 | FCT/0005 | FCT/0005/S/1 | Sybron Medical Centre                         |  | 25, Mungo Park close, opp Havista Hotel, Asokoro, Abuja       | Municipal   | FCT   |
| 1930 | FCT/0005 | FCT/0005/S/5 | Sybron Medical Centre                         |  | 25, Mungo Park close, opp Havista Hotel, Asokoro, Abuja       | Municipal   | FCT   |
| 1931 | FCT/0005 | FCT/0005/S/3 | Sybron Medical Centre                         |  | 25, Mungo Park close, opp Havista Hotel, Asokoro, Abuja       | Municipal   | FCT   |
| 1932 | FCT/0008 | FCT/0008/S/1 | Pan-Raf Hospital Ltd.                         |  | Nyanya Area C, Abuja                                          | Municipal   | FCT   |
| 1933 | FCT/0008 | FCT/0008/S/3 | Pan-Raf Hospital Ltd.                         |  | Nyanya Area C, Abuja                                          | Municipal   | FCT   |
| 1934 | FCT/0008 | FCT/0008/S/5 | Pan-Raf Hospital Ltd.                         |  | Nyanya Area C, Abuja                                          | Municipal   | FCT   |



|      |          |               |                                                  |            |                                                                                             |           |     |
|------|----------|---------------|--------------------------------------------------|------------|---------------------------------------------------------------------------------------------|-----------|-----|
| 1935 | FCT/0008 | FCT/0008/S/6  | Pan-Raf Hospital Ltd.                            |            | Nyanya Area C, Abuja                                                                        | Municipal | FCT |
| 1936 | FCT/0008 | FCT/0008/S/8  | Pan-Raf Hospital Ltd.                            |            | Nyanya Area C, Abuja                                                                        | Municipal | FCT |
| 1937 | FCT/0008 | FCT/0008/S/13 | Pan-Raf Hospital Ltd.                            |            | Nyanya Area C, Abuja                                                                        | Municipal | FCT |
| 1938 | FCT/0008 | FCT/0008/S/15 | Pan-Raf Hospital Ltd.                            |            | Nyanya Area C, Abuja                                                                        | Municipal | FCT |
| 1939 | FCT/0008 | FCT/0008/S/10 | Pan-Raf Hospital Ltd.                            |            | Nyanya Area C, Abuja                                                                        | Municipal | FCT |
| 1940 | FCT/0008 | FCT/0008/S/2  | Pan-Raf Hospital Ltd.                            |            | Nyanya Area C, Abuja                                                                        | Municipal | FCT |
| 1941 | FCT/0014 | FCT/0014/S/5  | Primary Health Clinic,<br>Karonmagaji            |            | Karonmajigi, Abuja                                                                          | Municipal | FCT |
| 1942 | FCT/0017 | FCT/0017/S/14 | The Comforter Clinic &<br>Diag. Centre           |            | Plot 1233, 1 (R) 4 Road by<br>AMAC International Market<br>behind CBN Quarters Lugbe<br>FHA | Municipal | FCT |
| 1943 | FCT/0018 | FCT/0018/S/4  | Al Fama Pharmacy                                 | Pharmacy   | New FCDA Life Camp,<br>Gwarpinpa, Abuja                                                     | Municipal | FCT |
| 1944 | FCT/0020 | FCT/0020/S/4  | Nolad Pharm. & Allied<br>Co. Ltd.                | Pharmacy   | Plot 278 Aminu Kano<br>Crescent (Opposite Mr.<br>Biggs) Wuse II, Abuja                      | Municipal | FCT |
| 1945 | FCT/0022 | FCT/0022/S/4  | Richneworld Pharmacy<br>Ltd.                     | Pharmacy   | 2nd Avenue, Off Foreign<br>Affairs Qtrs, Gwarinpa                                           | Municipal | FCT |
| 1946 | FCT/0024 | FCT/0024/S/5  | Alpha-Royal Medical<br>Ltd.                      | Laboratory | Suite A Mobil Filling Station<br>complex, Karu Site                                         | Municipal | FCT |
| 1947 | FCT/0028 | FCT/0028/S/5  | Goodman Medical<br>Diag. Lab.                    | Laboratory | 7 Cornershop, Area A,<br>Nyanya                                                             | Municipal | FCT |
| 1948 | FCT/0030 | FCT/0030/S/4  | Boniks pharmacy                                  | Pharmacy   | Shop 5, Gwarinpa Estate, By<br>FHA Home Office, 3rd<br>Avenue                               | Municipal | FCT |
| 1949 | FCT/0031 | FCT/0031/S/4  | Hephzibah Pharmacy<br>Nig. Ltd.                  | Pharmacy   | Shop 3&4, Goodson Plaza,<br>Behind Tony Anthony Lane,<br>Gwarinpa                           | Municipal | FCT |
| 1950 | FCT/0040 | FCT/0040/S/1  | Kings Care Hospital Ltd<br>Kubwa                 |            | 7, Christmas Road, Behind<br>Police Affairs, Kubwa Abuja                                    | Bwari     | FCT |
| 1951 | FCT/0040 | FCT/0040/S/5  | Kings Care Hospital Ltd<br>Kubwa                 |            | 7, Christmas Road, Behind<br>Police Affairs, Kubwa Abuja                                    | Bwari     | FCT |
| 1952 | FCT/0040 | FCT/0040/S/3  | Kings Care Hospital Ltd<br>Kubwa                 |            | 7, Christmas Road, Behind<br>Police Affairs, Kubwa Abuja                                    | Bwari     | FCT |
| 1953 | FCT/0044 | FCT/0044/S/5  | Pison Hospital                                   |            | 3553 Gado Nasko Road by<br>MTN office, Phase IV, Kubwa                                      | Municipal | FCT |
| 1954 | FCT/0044 | FCT/0044/S/7  | Pison Hospital                                   |            | 3553 Gado Nasko Road by<br>MTN office, Phase IV, Kubwa                                      | Municipal | FCT |
| 1955 | FCT/0044 | FCT/0044/S/3  | Pison Hospital                                   |            | 3553 Gado Nasko Road by<br>MTN office, Phase IV, Kubwa                                      | Municipal | FCT |
| 1956 | FCT/0046 | FCT/0046/S/1  | Grace Of God Specialist<br>Med. Centre           |            | Phrase 2, Site 2, Kubwa,<br>Abuja                                                           | Bwari     | FCT |
| 1957 | FCT/0046 | FCT/0046/S/5  | Grace Of God Specialist<br>Med. Centre           |            | Phrase 2, Site 2, Kubwa,<br>Abuja                                                           | Bwari     | FCT |
| 1958 | FCT/0047 | FCT/0047/S/13 | Kubwa General<br>Hospital                        |            | Phase 4 Opp. Gss, Kubwa,<br>Abuja                                                           | Bwari     | FCT |
| 1959 | FCT/0047 | FCT/0047/S/4  | Kubwa General<br>Hospital                        |            | Phase 4 Opp. Gss, Kubwa,<br>Abuja                                                           | Bwari     | FCT |
| 1960 | FCT/0047 | FCT/0047/S/5  | Kubwa General<br>Hospital                        |            | Phase 4 Opp. Gss, Kubwa,<br>Abuja                                                           | Bwari     | FCT |
| 1961 | FCT/0049 | FCT/0049/S/3  | St. Vincent Clinic &<br>Maternity                |            | Daughtretr"s Of Charity,<br>Biyazhin Road, Kubwa                                            | Bwari     | FCT |
| 1962 | FCT/0049 | FCT/0049/S/4  | St. Vincent Clinic &<br>Maternity                |            | Daughtretr"s Of Charity,<br>Biyazhin Road, Kubwa                                            | Bwari     | FCT |
| 1963 | FCT/0049 | FCT/0049/S/5  | St. Vincent Clinic &<br>Maternity                |            | Daughtretr"s Of Charity,<br>Biyazhin Road, Kubwa                                            | Bwari     | FCT |
| 1964 | FCT/0050 | FCT/0050/S/4  | Royal Lords Hospital,<br>Clinics & Maternity Ltd |            | Plot 107, Zone 4, Dutse<br>Alhaji, Abuja                                                    | Bwari     | FCT |
| 1965 | FCT/0050 | FCT/0050/S/5  | Royal Lords Hospital,<br>Clinics & Maternity Ltd |            | Plot 107, Zone 4, Dutse<br>Alhaji, Abuja                                                    | Bwari     | FCT |
| 1966 | FCT/0050 | FCT/0050/S/14 | Royal Lords Hospital,<br>Clinics & Maternity Ltd |            | Plot 107, Zone 4, Dutse<br>Alhaji, Abuja                                                    | Bwari     | FCT |
| 1967 | FCT/0055 | FCT/0055/S/4  | Nassara Pharmacy<br>Chem. & Store                | Pharmacy   | 18/19 Sultan Dasuki Way<br>Fha, Kubwa                                                       | Bwari     | FCT |
| 1968 | FCT/0062 | FCT/0062/S/5  | Kavron Medical<br>Laboratory                     | Laboratory | Ushafa Road, Bwari                                                                          | Bwari     | FCT |
| 1969 | FCT/0065 | FCT/0065/S/4  | Anes Pharmacy &<br>Stores Ltd.                   | Pharmacy   | 34, Shagari Road Opp. Jamb<br>Office, Bwari                                                 | Bwari     | FCT |
| 1970 | FCT/0070 | FCT/0070/S/4  | Novac Pharmacy                                   | Pharmacy   | Southern Dasuki/Gado<br>Nasco, Traffic Junction,<br>Phase 2/2, Kubwa.                       | Bwari     | FCT |

|      |          |               |                            |              |                                                                                       |            |     |
|------|----------|---------------|----------------------------|--------------|---------------------------------------------------------------------------------------|------------|-----|
| 1971 | FCT/0075 | FCT/0075/S/5  | Oxmed Laboratory           | Laboratory   | 172 Civil Centre, Gwagwalada                                                          | Gwagwalada | FCT |
| 1972 | FCT/0078 | FCT/0078/S/5  | Peak Medical Centre        | Laboratory   | Gwagwalada                                                                            | Gwagwalada | FCT |
| 1973 | FCT/0079 | FCT/0079/S/4  | Agestones Pharmaceuticals  | Pharmacy     | Plot 7, Phase 1 Shopping Centre, Gwagwalada                                           | Gwagwalada | FCT |
| 1974 | FCT/0080 | FCT/0080/S/1  | Acme-Joe Pharmacy          | Pharmacy     | 18 Secretariat Road, Phase 1, Gwagwalada                                              | Gwagwalada | FCT |
| 1975 | FCT/0081 | FCT/0081/S/6  | Skylark Pharmacy           | Pharmacy     | 9 Phase III Shopping complex, Off specialist Hosp., Gwagwalada                        | Gwagwalada | FCT |
| 1976 | FCT/0082 | FCT/0082/S/4  | Atma Rime Pharm. Nig. Ltd. | Pharmacy     | 12B, University Road, Phase II, Gwagwalada                                            | Gwagwalada | FCT |
| 1977 | FCT/0085 | FCT/0085/S/12 | Adkan Specialist Clinic    | Urology, ENT | Block D, 23 FMW&H Estate, Behind Kontangora Estate, Gwagwalada                        | Gwagwalada | FCT |
| 1978 | FCT/0085 | FCT/0085/S/4  | Adkan Specialist Clinic    | Urology, ENT | Block D, 23 FMW&H Estate, Behind Kontangora Estate, Gwagwalada                        | Gwagwalada | FCT |
| 1979 | FCT/0086 | FCT/0086/S/5  | Rhema Foundation Hospital  |              | Rhema Fountain, Kwali, Abuja                                                          | Kwali      | FCT |
| 1980 | FCT/0091 | FCT/0091/S/3  | Maitama District Hospital  |              | Maitama Abuja                                                                         | Municipal  | FCT |
| 1981 | FCT/0091 | FCT/0091/S/4  | Maitama District Hospital  |              | Maitama Abuja                                                                         | Municipal  | FCT |
| 1982 | FCT/0091 | FCT/0091/S/5  | Maitama District Hospital  |              | Maitama Abuja                                                                         | Municipal  | FCT |
| 1983 | FCT/0091 | FCT/0091/S/2  | Maitama District Hospital  |              | Maitama Abuja                                                                         | Municipal  | FCT |
| 1984 | FCT/0091 | FCT/0091/S/1  | Maitama District Hospital  |              | Maitama Abuja                                                                         | Municipal  | FCT |
| 1985 | FCT/0092 | FCT/0092/S/2  | Asokoro District Hospital  |              | Asokoro, Abuja                                                                        | Municipal  | FCT |
| 1986 | FCT/0092 | FCT/0092/S/5  | Asokoro District Hospital  |              | Asokoro, Abuja                                                                        | Municipal  | FCT |
| 1987 | FCT/0092 | FCT/0092/S/4  | Asokoro District Hospital  |              | Asokoro, Abuja                                                                        | Municipal  | FCT |
| 1988 | FCT/0092 | FCT/0092/S/6  | Asokoro District Hospital  |              | Asokoro, Abuja                                                                        | Municipal  | FCT |
| 1989 | FCT/0092 | FCT/0092/S/3  | Asokoro District Hospital  |              | Asokoro, Abuja                                                                        | Municipal  | FCT |
| 1990 | FCT/0092 | FCT/0092/S/1  | Asokoro District Hospital  |              | Asokoro, Abuja                                                                        | Municipal  | FCT |
| 1991 | FCT/0092 | FCT/0092/S/8  | Asokoro District Hospital  |              | Asokoro, Abuja                                                                        | Municipal  | FCT |
| 1992 | FCT/0092 | FCT/0092/S/11 | Asokoro District Hospital  |              | Asokoro, Abuja                                                                        | Municipal  | FCT |
| 1993 | FCT/0093 | FCT/0093/S/1  | Wuse District Hospital     |              | Wuse, Abuja                                                                           | Municipal  | FCT |
| 1994 | FCT/0093 | FCT/0093/S/2  | Wuse District Hospital     |              | Wuse, Abuja                                                                           | Municipal  | FCT |
| 1995 | FCT/0093 | FCT/0093/S/4  | Wuse District Hospital     |              | Wuse, Abuja                                                                           | Municipal  | FCT |
| 1996 | FCT/0093 | FCT/0093/S/12 | Wuse District Hospital     |              | Wuse, Abuja                                                                           | Municipal  | FCT |
| 1997 | FCT/0093 | FCT/0093/S/11 | Wuse District Hospital     |              | Wuse, Abuja                                                                           | Municipal  | FCT |
| 1998 | FCT/0093 | FCT/0093/S/6  | Wuse District Hospital     |              | Wuse, Abuja                                                                           | Municipal  | FCT |
| 1999 | FCT/0093 | FCT/0093/S/3  | Wuse District Hospital     |              | Wuse, Abuja                                                                           | Municipal  | FCT |
| 2000 | FCT/0093 | FCT/0093/S/5  | Wuse District Hospital     |              | Wuse, Abuja                                                                           | Municipal  | FCT |
| 2001 | FCT/0095 | FCT/0095/S/5  | Asher Hospital & Maternity |              | Plot 1197, Kataamkpe Cadastral Zone B07, Opp NICON Junction, Berger-Kubwa Express way | Municipal  | FCT |
| 2002 | FCT/0095 | FCT/0095/S/11 | Asher Hospital & Maternity |              | Plot 1197, Kataamkpe Cadastral Zone B07, Opp NICON Junction, Berger-Kubwa Express way | Municipal  | FCT |
| 2003 | FCT/0095 | FCT/0095/S/1  | Asher Hospital & Maternity |              | Plot 1197, Kataamkpe Cadastral Zone B07, Opp NICON Junction, Berger-Kubwa Express way | Municipal  | FCT |
| 2004 | FCT/0095 | FCT/0095/S/3  | Asher Hospital & Maternity |              | Plot 1197, Kataamkpe Cadastral Zone B07, Opp NICON Junction, Berger-Kubwa Express way | Municipal  | FCT |
| 2005 | FCT/0095 | FCT/0095/S/7  | Asher Hospital & Maternity |              | Plot 1197, Kataamkpe Cadastral Zone B07, Opp NICON Junction, Berger-Kubwa Express way | Municipal  | FCT |
| 2006 | FCT/0095 | FCT/0095/S/8  | Asher Hospital & Maternity |              | Plot 1197, Kataamkpe Cadastral Zone B07, Opp NICON Junction, Berger-Kubwa Express way | Municipal  | FCT |

|      |          |               |                                      |  |                                                                                       |           |     |
|------|----------|---------------|--------------------------------------|--|---------------------------------------------------------------------------------------|-----------|-----|
| 2007 | FCT/0095 | FCT/0095/S/2  | Asher Hospital & Maternity           |  | Plot 1197, Kataamkpe Cadastral Zone B07, Opp NICON Junction, Berger-Kubwa Express way | Municipal | FCT |
| 2008 | FCT/0095 | FCT/0095/S/15 | Asher Hospital & Maternity           |  | Plot 1197, Kataamkpe Cadastral Zone B07, Opp NICON Junction, Berger-Kubwa Express way | Municipal | FCT |
| 2009 | FCT/0097 | FCT/0097/S/12 | Sauki Private Hospital               |  | Plot 90 Zone 6 Yaounde Crescent Wuse                                                  | Municipal | FCT |
| 2010 | FCT/0097 | FCT/0097/S/10 | Sauki Private Hospital               |  | Plot 90 Zone 6 Yaounde Crescent Wuse                                                  | Municipal | FCT |
| 2011 | FCT/0097 | FCT/0097/S/6  | Sauki Private Hospital               |  | Plot 90 Zone 6 Yaounde Crescent Wuse                                                  | Municipal | FCT |
| 2012 | FCT/0097 | FCT/0097/S/1  | Sauki Private Hospital               |  | Plot 90 Zone 6 Yaounde Crescent Wuse                                                  | Municipal | FCT |
| 2013 | FCT/0097 | FCT/0097/S/3  | Sauki Private Hospital               |  | Plot 90 Zone 6 Yaounde Crescent Wuse                                                  | Municipal | FCT |
| 2014 | FCT/0097 | FCT/0097/S/14 | Sauki Private Hospital               |  | Plot 90 Zone 6 Yaounde Crescent Wuse                                                  | Municipal | FCT |
| 2015 | FCT/0097 | FCT/0097/S/5  | Sauki Private Hospital               |  | Plot 90 Zone 6 Yaounde Crescent Wuse                                                  | Municipal | FCT |
| 2016 | FCT/0097 | FCT/0097/S/4  | Sauki Private Hospital               |  | Plot 90 Zone 6 Yaounde Crescent Wuse                                                  | Municipal | FCT |
| 2017 | FCT/0097 | FCT/0097/S/11 | Sauki Private Hospital               |  | Plot 90 Zone 6 Yaounde Crescent Wuse                                                  | Municipal | FCT |
| 2018 | FCT/0097 | FCT/0097/S/15 | Sauki Private Hospital               |  | Plot 90 Zone 6 Yaounde Crescent Wuse                                                  | Municipal | FCT |
| 2019 | FCT/0097 | FCT/0097/S/8  | Sauki Private Hospital               |  | Plot 90 Zone 6 Yaounde Crescent Wuse                                                  | Municipal | FCT |
| 2020 | FCT/0097 | FCT/0097/S/7  | Sauki Private Hospital               |  | Plot 90 Zone 6 Yaounde Crescent Wuse                                                  | Municipal | FCT |
| 2021 | FCT/0097 | FCT/0097/S/2  | Sauki Private Hospital               |  | Plot 90 Zone 6 Yaounde Crescent Wuse                                                  | Municipal | FCT |
| 2022 | FCT/0099 | FCT/0099/S/3  | General Hospital, Nyanya             |  | Nyanya, Abuja                                                                         | Municipal | FCT |
| 2023 | FCT/0099 | FCT/0099/S/1  | General Hospital, Nyanya             |  | Nyanya, Abuja                                                                         | Municipal | FCT |
| 2024 | FCT/0099 | FCT/0099/S/6  | General Hospital, Nyanya             |  | Nyanya, Abuja                                                                         | Municipal | FCT |
| 2025 | FCT/0099 | FCT/0099/S/4  | General Hospital, Nyanya             |  | Nyanya, Abuja                                                                         | Municipal | FCT |
| 2026 | FCT/0102 | FCT/0102/S/5  | Our Lady Of Fatima Catholic Hospital |  | Ushafa Rd., Bwari, Abuja                                                              | Bwari     | FCT |
| 2027 | FCT/0103 | FCT/0103/S/1  | Kwali General Hospital               |  | Off Abaji/Lokoja Road, Near Area Council Secretariat, Kwali,                          | Kwali     | FCT |
| 2028 | FCT/0103 | FCT/0103/S/3  | Kwali General Hospital               |  | Off Abaji/Lokoja Road, Near Area Council Secretariat, Kwali,                          | Kwali     | FCT |
| 2029 | FCT/0103 | FCT/0103/S/5  | Kwali General Hospital               |  | Off Abaji/Lokoja Road, Near Area Council Secretariat, Kwali,                          | Kwali     | FCT |
| 2030 | FCT/0103 | FCT/0103/S/4  | Kwali General Hospital               |  | Off Abaji/Lokoja Road, Near Area Council Secretariat, Kwali,                          | Kwali     | FCT |
| 2031 | FCT/0105 | FCT/0105/S/5  | General Hospital - Karshi            |  | Karshi, Abuja                                                                         | Municipal | FCT |
| 2032 | FCT/0105 | FCT/0105/S/4  | General Hospital - Karshi            |  | Karshi, Abuja                                                                         | Municipal | FCT |
| 2033 | FCT/0105 | FCT/0105/S/8  | General Hospital - Karshi            |  | Karshi, Abuja                                                                         | Municipal | FCT |
| 2034 | FCT/0105 | FCT/0105/S/3  | General Hospital - Karshi            |  | Karshi, Abuja                                                                         | Municipal | FCT |
| 2035 | FCT/0106 | FCT/0106/S/10 | Alliance Hospital and Services Ltd   |  | Plot 801, No. 5 Malumfashi Close off Emeka Anyaoku Street, Garki Area 11              | Municipal | FCT |
| 2036 | FCT/0106 | FCT/0106/S/2  | Alliance Hospital and Services Ltd   |  | Plot 801, No. 5 Malumfashi Close off Emeka Anyaoku Street, Garki Area 11              | Municipal | FCT |
| 2037 | FCT/0106 | FCT/0106/S/4  | Alliance Hospital and Services Ltd   |  | Plot 801, No. 5 Malumfashi Close off Emeka Anyaoku Street, Garki Area 11              | Municipal | FCT |
| 2038 | FCT/0106 | FCT/0106/S/3  | Alliance Hospital and Services Ltd   |  | Plot 801, No. 5 Malumfashi Close off Emeka Anyaoku Street, Garki Area 11              | Municipal | FCT |
| 2039 | FCT/0106 | FCT/0106/S/1  | Alliance Hospital and Services Ltd   |  | Plot 801, No. 5 Malumfashi Close off Emeka Anyaoku Street, Garki Area 11              | Municipal | FCT |
| 2040 | FCT/0106 | FCT/0106/S/6  | Alliance Hospital and Services Ltd   |  | Plot 801, No. 5 Malumfashi Close off Emeka Anyaoku Street, Garki Area 11              | Municipal | FCT |

|      |          |               |                                    |  |                                                                          |           |     |
|------|----------|---------------|------------------------------------|--|--------------------------------------------------------------------------|-----------|-----|
| 2041 | FCT/0106 | FCT/0106/S/5  | Alliance Hospital and Services Ltd |  | Plot 801, No. 5 Malumfashi Close off Emeka Anyaoku Street, Garki Area 11 | Municipal | FCT |
| 2042 | FCT/0107 | FCT/0107/S/7  | Ruz Medical Centre                 |  | Ubiaja Crescent, Garki, Abuja                                            | Municipal | FCT |
| 2043 | FCT/0107 | FCT/0107/S/5  | Ruz Medical Centre                 |  | Ubiaja Crescent, Garki, Abuja                                            | Municipal | FCT |
| 2044 | FCT/0108 | FCT/0108/S/1  | Rouz Hospital & Maternity Limited  |  | Apo, Legislative Qtrs, Phase II                                          | Municipal | FCT |
| 2045 | FCT/0108 | FCT/0108/S/6  | Rouz Hospital & Maternity Limited  |  | Apo, Legislative Qtrs, Phase II                                          | Municipal | FCT |
| 2046 | FCT/0108 | FCT/0108/S/5  | Rouz Hospital & Maternity Limited  |  | Apo, Legislative Qtrs, Phase II                                          | Municipal | FCT |
| 2047 | FCT/0108 | FCT/0108/S/3  | Rouz Hospital & Maternity Limited  |  | Apo, Legislative Qtrs, Phase II                                          | Municipal | FCT |
| 2048 | FCT/0109 | FCT/0109/S/5  | Pyramid Medical Centre             |  | Plot 1438 Garki li Opp. Nia Cadastral Zone A3 Nnamdi Azikwe              | Municipal | FCT |
| 2049 | FCT/0110 | FCT/0110/S/5  | Amana Medical Centre               |  | No. 5, Ilorin Street, off Ogbomosho Street, Area 8, Abuja                | Municipal | FCT |
| 2050 | FCT/0110 | FCT/0110/S/3  | Amana Medical Centre               |  | No. 5, Ilorin Street, off Ogbomosho Street, Area 8, Abuja                | Municipal | FCT |
| 2051 | FCT/0110 | FCT/0110/S/6  | Amana Medical Centre               |  | No. 5, Ilorin Street, off Ogbomosho Street, Area 8, Abuja                | Municipal | FCT |
| 2052 | FCT/0110 | FCT/0110/S/1  | Amana Medical Centre               |  | No. 5, Ilorin Street, off Ogbomosho Street, Area 8, Abuja                | Municipal | FCT |
| 2053 | FCT/0110 | FCT/0110/S/2  | Amana Medical Centre               |  | No. 5, Ilorin Street, off Ogbomosho Street, Area 8, Abuja                | Municipal | FCT |
| 2054 | FCT/0110 | FCT/0110/S/4  | Amana Medical Centre               |  | No. 5, Ilorin Street, off Ogbomosho Street, Area 8, Abuja                | Municipal | FCT |
| 2055 | FCT/0111 | FCT/0111/S/4  | Fereprod. Medical Centre           |  | Off Ahmadu Bello Way Behind Nepa Sub-Station-2 Cbn Area li,              | Municipal | FCT |
| 2056 | FCT/0111 | FCT/0111/S/2  | Fereprod. Medical Centre           |  | Off Ahmadu Bello Way Behind Nepa Sub-Station-2 Cbn Area li,              | Municipal | FCT |
| 2057 | FCT/0111 | FCT/0111/S/5  | Fereprod. Medical Centre           |  | Off Ahmadu Bello Way Behind Nepa Sub-Station-2 Cbn Area li,              | Municipal | FCT |
| 2058 | FCT/0111 | FCT/0111/S/1  | Fereprod. Medical Centre           |  | Off Ahmadu Bello Way Behind Nepa Sub-Station-2 Cbn Area li,              | Municipal | FCT |
| 2059 | FCT/0111 | FCT/0111/S/12 | Fereprod. Medical Centre           |  | Off Ahmadu Bello Way Behind Nepa Sub-Station-2 Cbn Area li,              | Municipal | FCT |
| 2060 | FCT/0111 | FCT/0111/S/10 | Fereprod. Medical Centre           |  | Off Ahmadu Bello Way Behind Nepa Sub-Station-2 Cbn Area li,              | Municipal | FCT |
| 2061 | FCT/0111 | FCT/0111/S/3  | Fereprod. Medical Centre           |  | Off Ahmadu Bello Way Behind Nepa Sub-Station-2 Cbn Area li,              | Municipal | FCT |
| 2062 | FCT/0111 | FCT/0111/S/6  | Fereprod. Medical Centre           |  | Off Ahmadu Bello Way Behind Nepa Sub-Station-2 Cbn Area li,              | Municipal | FCT |
| 2063 | FCT/0115 | FCT/0115/S/5  | Jilf Clinic Ent.                   |  | Plot D 231 Crescent By 232 Road Kado Estate                              | Municipal | FCT |
| 2064 | FCT/0120 | FCT/0120/S/3  | Limi Hospital & Mat., Ltd.         |  | Plot 541, Behind Icpc, Central Area, Abuja                               | Municipal | FCT |
| 2065 | FCT/0120 | FCT/0120/S/1  | Limi Hospital & Mat., Ltd.         |  | Plot 541, Behind Icpc, Central Area, Abuja                               | Municipal | FCT |
| 2066 | FCT/0120 | FCT/0120/S/7  | Limi Hospital & Mat., Ltd.         |  | Plot 541, Behind Icpc, Central Area, Abuja                               | Municipal | FCT |
| 2067 | FCT/0120 | FCT/0120/S/6  | Limi Hospital & Mat., Ltd.         |  | Plot 541, Behind Icpc, Central Area, Abuja                               | Municipal | FCT |
| 2068 | FCT/0120 | FCT/0120/S/5  | Limi Hospital & Mat., Ltd.         |  | Plot 541, Behind Icpc, Central Area, Abuja                               | Municipal | FCT |
| 2069 | FCT/0120 | FCT/0120/S/8  | Limi Hospital & Mat., Ltd.         |  | Plot 541, Behind Icpc, Central Area, Abuja                               | Municipal | FCT |
| 2070 | FCT/0120 | FCT/0120/S/4  | Limi Hospital & Mat., Ltd.         |  | Plot 541, Behind Icpc, Central Area, Abuja                               | Municipal | FCT |
| 2071 | FCT/0120 | FCT/0120/S/2  | Limi Hospital & Mat., Ltd.         |  | Plot 541, Behind Icpc, Central Area, Abuja                               | Municipal | FCT |
| 2072 | FCT/0122 | FCT/0122/S/4  | National Assembly Clinic           |  | Three Arm Zone, Central Area, Abuja                                      | Municipal | FCT |
| 2073 | FCT/0123 | FCT/0123/S/1  | State House Clinic                 |  | (Presidency) Three Arm Zone, Central Area, Abuja                         | Municipal | FCT |
| 2074 | FCT/0123 | FCT/0123/S/5  | State House Clinic                 |  | (Presidency) Three Arm Zone, Central Area, Abuja                         | Municipal | FCT |
| 2075 | FCT/0123 | FCT/0123/S/4  | State House Clinic                 |  | (Presidency) Three Arm Zone, Central Area, Abuja                         | Municipal | FCT |

|      |          |               |                                          |  |                                                                |           |     |
|------|----------|---------------|------------------------------------------|--|----------------------------------------------------------------|-----------|-----|
| 2076 | FCT/0123 | FCT/0123/S/6  | State House Clinic                       |  | (Presidency) Three Arm Zone, Central Area, Abuja               | Municipal | FCT |
| 2077 | FCT/0123 | FCT/0123/S/11 | State House Clinic                       |  | (Presidency) Three Arm Zone, Central Area, Abuja               | Municipal | FCT |
| 2078 | FCT/0123 | FCT/0123/S/15 | State House Clinic                       |  | (Presidency) Three Arm Zone, Central Area, Abuja               | Municipal | FCT |
| 2079 | FCT/0123 | FCT/0123/S/2  | State House Clinic                       |  | (Presidency) Three Arm Zone, Central Area, Abuja               | Municipal | FCT |
| 2080 | FCT/0123 | FCT/0123/S/8  | State House Clinic                       |  | (Presidency) Three Arm Zone, Central Area, Abuja               | Municipal | FCT |
| 2081 | FCT/0123 | FCT/0123/S/3  | State House Clinic                       |  | (Presidency) Three Arm Zone, Central Area, Abuja               | Municipal | FCT |
| 2082 | FCT/0123 | FCT/0123/S/7  | State House Clinic                       |  | (Presidency) Three Arm Zone, Central Area, Abuja               | Municipal | FCT |
| 2083 | FCT/0127 | FCT/0127/S/1  | Sami-Wadata Clinics Ltd.                 |  | Plot 766 Bukcanan Crescent, Off Aminu Kano Crescent, Wuse II   | Municipal | FCT |
| 2084 | FCT/0127 | FCT/0127/S/3  | Sami-Wadata Clinics Ltd.                 |  | Plot 766 Bukcanan Crescent, Off Aminu Kano Crescent, Wuse II   | Municipal | FCT |
| 2085 | FCT/0127 | FCT/0127/S/5  | Sami-Wadata Clinics Ltd.                 |  | Plot 766 Bukcanan Crescent, Off Aminu Kano Crescent, Wuse II   | Municipal | FCT |
| 2086 | FCT/0127 | FCT/0127/S/12 | Sami-Wadata Clinics Ltd.                 |  | Plot 766 Bukcanan Crescent, Off Aminu Kano Crescent, Wuse II   | Municipal | FCT |
| 2087 | FCT/0128 | FCT/0128/S/5  | Iduna Specialist Hospital                |  | Plot 1200 Ndjamena Crescent, Wuse li                           | Municipal | FCT |
| 2088 | FCT/0128 | FCT/0128/S/2  | Iduna Specialist Hospital                |  | Plot 1200 Ndjamena Crescent, Wuse li                           | Municipal | FCT |
| 2089 | FCT/0131 | FCT/0131/S/3  | Mercy Specialist Hospital & Diag. Centre |  | Off Aminu Kano Crescent, Plot 619c Zone A7, Wuse II, Abuja     | Municipal | FCT |
| 2090 | FCT/0131 | FCT/0131/S/2  | Mercy Specialist Hospital & Diag. Centre |  | Off Aminu Kano Crescent, Plot 619c Zone A7, Wuse II, Abuja     | Municipal | FCT |
| 2091 | FCT/0131 | FCT/0131/S/4  | Mercy Specialist Hospital & Diag. Centre |  | Off Aminu Kano Crescent, Plot 619c Zone A7, Wuse II, Abuja     | Municipal | FCT |
| 2092 | FCT/0131 | FCT/0131/S/1  | Mercy Specialist Hospital & Diag. Centre |  | Off Aminu Kano Crescent, Plot 619c Zone A7, Wuse II, Abuja     | Municipal | FCT |
| 2093 | FCT/0131 | FCT/0131/S/6  | Mercy Specialist Hospital & Diag. Centre |  | Off Aminu Kano Crescent, Plot 619c Zone A7, Wuse II, Abuja     | Municipal | FCT |
| 2094 | FCT/0131 | FCT/0131/S/5  | Mercy Specialist Hospital & Diag. Centre |  | Off Aminu Kano Crescent, Plot 619c Zone A7, Wuse II, Abuja     | Municipal | FCT |
| 2095 | FCT/0132 | FCT/0132/S/8  | Kings Care Hospital - Wuse               |  | Wuse Zone 4, Abuja                                             | Municipal | FCT |
| 2096 | FCT/0132 | FCT/0132/S/10 | Kings Care Hospital - Wuse               |  | Wuse Zone 4, Abuja                                             | Municipal | FCT |
| 2097 | FCT/0132 | FCT/0132/S/6  | Kings Care Hospital - Wuse               |  | Wuse Zone 4, Abuja                                             | Municipal | FCT |
| 2098 | FCT/0132 | FCT/0132/S/15 | Kings Care Hospital - Wuse               |  | Wuse Zone 4, Abuja                                             | Municipal | FCT |
| 2099 | FCT/0132 | FCT/0132/S/11 | Kings Care Hospital - Wuse               |  | Wuse Zone 4, Abuja                                             | Municipal | FCT |
| 2100 | FCT/0132 | FCT/0132/S/1  | Kings Care Hospital - Wuse               |  | Wuse Zone 4, Abuja                                             | Municipal | FCT |
| 2101 | FCT/0132 | FCT/0132/S/3  | Kings Care Hospital - Wuse               |  | Wuse Zone 4, Abuja                                             | Municipal | FCT |
| 2102 | FCT/0133 | FCT/0133/S/8  | Capital Hospital                         |  | 15, Oran Street, by Bank PHB, Off Olusegun Obasanjo way, Abuja | Municipal | FCT |
| 2103 | FCT/0133 | FCT/0133/S/5  | Capital Hospital                         |  | 15, Oran Street, by Bank PHB, Off Olusegun Obasanjo way, Abuja | Municipal | FCT |
| 2104 | FCT/0133 | FCT/0133/S/15 | Capital Hospital                         |  | 15, Oran Street, by Bank PHB, Off Olusegun Obasanjo way, Abuja | Municipal | FCT |
| 2105 | FCT/0138 | FCT/0138/S/5  | Queens Clinics                           |  | Plot 225, Cotonou Crescent, Wuse Zone 6, Abuja                 | Municipal | FCT |
| 2106 | FCT/0138 | FCT/0138/S/10 | Queens Clinics                           |  | Plot 225, Cotonou Crescent, Wuse Zone 6, Abuja                 | Municipal | FCT |
| 2107 | FCT/0139 | FCT/0139/S/5  | Bio-Royal Hospital & Maternity Ltd.      |  | No. 190, Okene/Jebba Close, Garki                              | Municipal | FCT |
| 2108 | FCT/0139 | FCT/0139/S/6  | Bio-Royal Hospital & Maternity Ltd.      |  | No. 190, Okene/Jebba Close, Garki                              | Municipal | FCT |
| 2109 | FCT/0139 | FCT/0139/S/3  | Bio-Royal Hospital & Maternity Ltd.      |  | No. 190, Okene/Jebba Close, Garki                              | Municipal | FCT |

|      |          |               |                                     |  |                                                                 |            |     |
|------|----------|---------------|-------------------------------------|--|-----------------------------------------------------------------|------------|-----|
| 2110 | FCT/0139 | FCT/0139/S/1  | Bio-Royal Hospital & Maternity Ltd. |  | No. 190, Okene/Jebba Close, Garki                               | Municipal  | FCT |
| 2111 | FCT/0141 | FCT/0141/S/8  | Holy Trinity Hospital Ltd.          |  | 27, Oro Ago Crescent, off Muhammadu Buhari Way, Garki II, Abuja | Municipal  | FCT |
| 2112 | FCT/0141 | FCT/0141/S/5  | Holy Trinity Hospital Ltd.          |  | 27, Oro Ago Crescent, off Muhammadu Buhari Way, Garki II, Abuja | Municipal  | FCT |
| 2113 | FCT/0141 | FCT/0141/S/2  | Holy Trinity Hospital Ltd.          |  | 27, Oro Ago Crescent, off Muhammadu Buhari Way, Garki II, Abuja | Municipal  | FCT |
| 2114 | FCT/0141 | FCT/0141/S/1  | Holy Trinity Hospital Ltd.          |  | 27, Oro Ago Crescent, off Muhammadu Buhari Way, Garki II, Abuja | Municipal  | FCT |
| 2115 | FCT/0141 | FCT/0141/S/7  | Holy Trinity Hospital Ltd.          |  | 27, Oro Ago Crescent, off Muhammadu Buhari Way, Garki II, Abuja | Municipal  | FCT |
| 2116 | FCT/0143 | FCT/0143/S/5  | Diamond Medical Centre Ltd.         |  | Plot 42, Beside Mr. Bigs By Model Pri. Sch. Gark II             | Municipal  | FCT |
| 2117 | FCT/0143 | FCT/0143/S/3  | Diamond Medical Centre Ltd.         |  | Plot 42, Beside Mr. Bigs By Model Pri. Sch. Gark II             | Municipal  | FCT |
| 2118 | FCT/0147 | FCT/0147/S/3  | Dara Medical Clinics                |  | Plot 202, Bacita Close, Off Plateau Street, Area 2 , Garki      | Municipal  | FCT |
| 2119 | FCT/0147 | FCT/0147/S/6  | Dara Medical Clinics                |  | Plot 202, Bacita Close, Off Plateau Street, Area 2 , Garki      | Municipal  | FCT |
| 2120 | FCT/0147 | FCT/0147/S/14 | Dara Medical Clinics                |  | Plot 202, Bacita Close, Off Plateau Street, Area 2 , Garki      | Municipal  | FCT |
| 2121 | FCT/0147 | FCT/0147/S/1  | Dara Medical Clinics                |  | Plot 202, Bacita Close, Off Plateau Street, Area 2 , Garki      | Municipal  | FCT |
| 2122 | FCT/0147 | FCT/0147/S/7  | Dara Medical Clinics                |  | Plot 202, Bacita Close, Off Plateau Street, Area 2 , Garki      | Municipal  | FCT |
| 2123 | FCT/0149 | FCT/0149/S/15 | Ministry Of Defence Staff Clinic    |  | Ship House, Olusegun Obasanjo Way, Area 10, Garki               | Municipal  | FCT |
| 2124 | FCT/0149 | FCT/0149/S/5  | Ministry Of Defence Staff Clinic    |  | Ship House, Olusegun Obasanjo Way, Area 10, Garki               | Municipal  | FCT |
| 2125 | FCT/0149 | FCT/0149/S/3  | Ministry Of Defence Staff Clinic    |  | Ship House, Olusegun Obasanjo Way, Area 10, Garki               | Municipal  | FCT |
| 2126 | FCT/0150 | FCT/0150/S/7  | Kinectic Hospital Limited           |  | Ahoda Close, off Emeka Anyaoku street, Area II, Garki           | Municipal  | FCT |
| 2127 | FCT/0150 | FCT/0150/S/5  | Kinectic Hospital Limited           |  | Ahoda Close, off Emeka Anyaoku street, Area II, Garki           | Municipal  | FCT |
| 2128 | FCT/0150 | FCT/0150/S/8  | Kinectic Hospital Limited           |  | Ahoda Close, off Emeka Anyaoku street, Area II, Garki           | Municipal  | FCT |
| 2129 | FCT/0152 | FCT/0152/S/14 | Lafiak Hospital                     |  | Toto Road, Abaji                                                | Abaji      | FCT |
| 2130 | FCT/0152 | FCT/0152/S/1  | Lafiak Hospital                     |  | Toto Road, Abaji                                                | Abaji      | FCT |
| 2131 | FCT/0153 | FCT/0153/S/1  | Gwagwalada Clinic & Maternity       |  | Kutunku Along Frcn Road, Abuja                                  | Gwagwalada | FCT |
| 2132 | FCT/0153 | FCT/0153/S/5  | Gwagwalada Clinic & Maternity       |  | Kutunku Along Frcn Road, Abuja                                  | Gwagwalada | FCT |
| 2133 | FCT/0153 | FCT/0153/S/3  | Gwagwalada Clinic & Maternity       |  | Kutunku Along Frcn Road, Abuja                                  | Gwagwalada | FCT |
| 2134 | FCT/0154 | FCT/0154/S/2  | Jerab Hospitals                     |  | Plot 145, Kutunku Near Radio House, Gwagwalada, Abuja           | Gwagwalada | FCT |
| 2135 | FCT/0154 | FCT/0154/S/5  | Jerab Hospitals                     |  | Plot 145, Kutunku Near Radio House, Gwagwalada, Abuja           | Gwagwalada | FCT |
| 2136 | FCT/0154 | FCT/0154/S/3  | Jerab Hospitals                     |  | Plot 145, Kutunku Near Radio House, Gwagwalada, Abuja           | Gwagwalada | FCT |
| 2137 | FCT/0154 | FCT/0154/S/6  | Jerab Hospitals                     |  | Plot 145, Kutunku Near Radio House, Gwagwalada, Abuja           | Gwagwalada | FCT |
| 2138 | FCT/0154 | FCT/0154/S/1  | Jerab Hospitals                     |  | Plot 145, Kutunku Near Radio House, Gwagwalada, Abuja           | Gwagwalada | FCT |
| 2139 | FCT/0154 | FCT/0154/S/7  | Jerab Hospitals                     |  | Plot 145, Kutunku Near Radio House, Gwagwalada, Abuja           | Gwagwalada | FCT |
| 2140 | FCT/0155 | FCT/0155/S/1  | Sliver Fountain Medical Centre      |  | Kukwala District, Opp. Kuchingoro, Along Airport Road, Abuja    | Municipal  | FCT |
| 2141 | FCT/0155 | FCT/0155/S/5  | Sliver Fountain Medical Centre      |  | Kukwala District, Opp. Kuchingoro, Along Airport Road, Abuja    | Municipal  | FCT |
| 2142 | FCT/0156 | FCT/0156/S/1  | Rapha Hospital And Maternity        |  | Phase Iii, Near Giwa Hotel, Jikwoyi, Abuja                      | Municipal  | FCT |
| 2143 | FCT/0156 | FCT/0156/S/5  | Rapha Hospital And Maternity        |  | Phase Iii, Near Giwa Hotel, Jikwoyi, Abuja                      | Municipal  | FCT |

|      |          |               |                                   |                                                                      |                                                                                            |           |     |
|------|----------|---------------|-----------------------------------|----------------------------------------------------------------------|--------------------------------------------------------------------------------------------|-----------|-----|
| 2144 | FCT/0156 | FCT/0156/S/6  | Rapha Hospital And Maternity      |                                                                      | Phase Iii, Near Giwa Hotel, Jikwoyi, Abuja                                                 | Municipal | FCT |
| 2145 | FCT/0156 | FCT/0156/S/3  | Rapha Hospital And Maternity      |                                                                      | Phase Iii, Near Giwa Hotel, Jikwoyi, Abuja                                                 | Municipal | FCT |
| 2146 | FCT/0158 | FCT/0158/S/6  | Nisa Premier Hospital             |                                                                      | Plot 618, Alex Ekweme Way, Jabi Abuja                                                      | Municipal | FCT |
| 2147 | FCT/0158 | FCT/0158/S/1  | Nisa Premier Hospital             |                                                                      | Plot 618, Alex Ekweme Way, Jabi Abuja                                                      | Municipal | FCT |
| 2148 | FCT/0158 | FCT/0158/S/3  | Nisa Premier Hospital             |                                                                      | Plot 618, Alex Ekweme Way, Jabi Abuja                                                      | Municipal | FCT |
| 2149 | FCT/0158 | FCT/0158/S/5  | Nisa Premier Hospital             |                                                                      | Plot 618, Alex Ekweme Way, Jabi Abuja                                                      | Municipal | FCT |
| 2150 | FCT/0159 | FCT/0159/S/15 | Abuja Clinic - Maitama            |                                                                      | Maitama, Abuja                                                                             | Municipal | FCT |
| 2151 | FCT/0159 | FCT/0159/S/5  | Abuja Clinic - Maitama            |                                                                      | Maitama, Abuja                                                                             | Municipal | FCT |
| 2152 | FCT/0159 | FCT/0159/S/6  | Abuja Clinic - Maitama            |                                                                      | Maitama, Abuja                                                                             | Municipal | FCT |
| 2153 | FCT/0159 | FCT/0159/S/4  | Abuja Clinic - Maitama            |                                                                      | Maitama, Abuja                                                                             | Municipal | FCT |
| 2154 | FCT/0159 | FCT/0159/S/11 | Abuja Clinic - Maitama            |                                                                      | Maitama, Abuja                                                                             | Municipal | FCT |
| 2155 | FCT/0159 | FCT/0159/S/10 | Abuja Clinic - Maitama            |                                                                      | Maitama, Abuja                                                                             | Municipal | FCT |
| 2156 | FCT/0159 | FCT/0159/S/8  | Abuja Clinic - Maitama            |                                                                      | Maitama, Abuja                                                                             | Municipal | FCT |
| 2157 | FCT/0159 | FCT/0159/S/7  | Abuja Clinic - Maitama            |                                                                      | Maitama, Abuja                                                                             | Municipal | FCT |
| 2158 | FCT/0159 | FCT/0159/S/2  | Abuja Clinic - Maitama            |                                                                      | Maitama, Abuja                                                                             | Municipal | FCT |
| 2159 | FCT/0165 | FCT/0165/S/4  | Bamak Pharmacy Ltd.               | Pharmacy                                                             | Suite 5 Sopping Complex Zone 3, Wuse                                                       | Municipal | FCT |
| 2160 | FCT/0169 | FCT/0169/S/4  | Welcare Pharmacy Nig. Ltd.        | Pharmacy                                                             | 590a Adekunbo Ademola Crescent, Wuse II                                                    | Municipal | FCT |
| 2161 | FCT/0170 | FCT/0170/S/4  | Opi Pharmacy & Stores Ltd.,       | Pharmacy                                                             | Sky Memorial Complex, Plot 578 Michael Okpara Way, Zone 5                                  | Municipal | FCT |
| 2162 | FCT/0172 | FCT/0172/S/4  | Lakeside Pharmacy Ltd.            | Pharmacy                                                             | Suite Shariff Shopping Complex Kade Str. Wuse II, Off Aminu                                | Municipal | FCT |
| 2163 | FCT/0178 | FCT/0178/S/4  | Total Trust Pharmacy Ltd.         | Pharmacy                                                             | Capital Plaza Old Karu Raod, Nyanya                                                        | Municipal | FCT |
| 2164 | FCT/0179 | FCT/0179/S/4  | Universal Gaskiya Pharmacy        | Pharmacy                                                             | Sop 50/51 KN Complx Nyanya Market Rd. Abuja                                                | Municipal | FCT |
| 2165 | FCT/0180 | FCT/0180/S/4  | Comprehensive Health Centre       | Pharmacy, Laboratory                                                 | Karshi, Abuja                                                                              | Municipal | FCT |
| 2166 | FCT/0180 | FCT/0180/S/5  | Comprehensive Health Centre       | Pharmacy, Laboratory                                                 | Karshi, Abuja                                                                              | Municipal | FCT |
| 2167 | FCT/0183 | FCT/0183/S/4  | Besio Pharmacy Ltd.               | Pharmacy                                                             | 45 Hillside Area A, Nyanya                                                                 | Municipal | FCT |
| 2168 | FCT/0188 | FCT/0188/S/4  | Redemption Pharmacy Ltd.          | Pharmacy                                                             | Shop 25, Neighbourhood Shopping Complex, F.H.A. Lugbe                                      | Municipal | FCT |
| 2169 | FCT/0189 | FCT/0189/S/4  | Newlife Pharmacy Nig. Ltd.        | Pharmacy                                                             | Shop G3, Fatima Plaza, Plot 2142, Mambolo Street, Opp. Catholic Church, Wuse Zone 2, Abuja | Municipal | FCT |
| 2170 | FCT/0193 | FCT/0193/S/4  | Deluxe Pharmacy & Stores          | Pharmacy                                                             | 11, Peshe Road, Karu                                                                       | Municipal | FCT |
| 2171 | FCT/0194 | FCT/0194/S/4  | Biogenes Pharmacy                 | Pharmacy                                                             | Conershop Opp. Custom Barracks, Karu                                                       | Municipal | FCT |
| 2172 | FCT/0195 | FCT/0195/S/5  | Abba Medical Laboratories         | Laboratory                                                           | UTC Complex, Suite FF 14, Area 10                                                          | Municipal | FCT |
| 2173 | FCT/0198 | FCT/0198/S/5  | Sauki Medical Diagnostic Centre   | Laboratory                                                           | Shop 6, Neighbourhood Centre, Wuse Zone 3                                                  | Municipal | FCT |
| 2174 | FCT/0201 | FCT/0201/S/5  | Biosensors Medical Laboratory     | Laboratory                                                           | Suite 212, 411 Plaza, Near Big Bite, Adetokunbo Ademola Crescent.                          | Municipal | FCT |
| 2175 | FCT/0202 | FCT/0202/S/5  | Solo Medical Laboratory Services  | Laboratory                                                           | 466, Lobito Crescent, Wuse II, Abuja.                                                      | Municipal | FCT |
| 2176 | FCT/0203 | FCT/0203/S/5  | Mek Medical Daignostic Laboratory | Laboratory                                                           | Suite D6, Abuja Shopping Mall, Wuse Zone 3                                                 | Municipal | FCT |
| 2177 | FCT/0207 | FCT/0207/S/4  | Abson Pharmacy & Stores           | Pharmacy                                                             | Suite 9, Peoples Shopping Centre, Plot 1263, Jere Street, Garki                            | Municipal | FCT |
| 2178 | FCT/0208 | FCT/0208/S    | Regal Dental Clinic               | Dental                                                               | Plot 202, Bacita Close, Off Plateau Street, Area 2, Section                                | Municipal | FCT |
| 2179 | FCT/0211 | FCT/0211/S/4  | Medixal Nig. Ltd.                 | Pharmacy                                                             | Shop 10 Zone B N/hood Shopping Centre, Apo                                                 | Municipal | FCT |
| 2180 | FCT/0216 | FCT/0216/S/6  | Maitama District Hospital         | Internal Medicine, Surgery, O & G, Paediatrics, Pharmacy, Laboratory | Maitama, Abuja                                                                             | Municipal | FCT |

|      |          |               |                                       |                       |                                                                      |           |     |
|------|----------|---------------|---------------------------------------|-----------------------|----------------------------------------------------------------------|-----------|-----|
| 2181 | FCT/0227 | FCT/0227/S/4  | Alpha Pharmacy                        | Pharmacy              | Victory Plaza, Plot 1490 Gimbiya Street, Area 11, Garki, Abuja       | Municipal | FCT |
| 2182 | FCT/0229 | FCT/0229/S/4  | De-peror Pharmacy & Stores Limited    | Pharmacy              | Syndicate Plaza, Area 11, Garki, Abuja                               | Municipal | FCT |
| 2183 | FCT/0230 | FCT/0230/S/4  | Mc Sofi Pharmacy Ltd.                 | Pharmacy              | Plot 1330 Jere Str. Off Funmilayo Ranson Kuti Way, Garki II          | Municipal | FCT |
| 2184 | FCT/0231 | FCT/0231/S/4  | Ril Pharmacy & Stores Ltd.            | Pharmacy              | Suite 516 Labbo Abubakar Shopping Complex 12 Crescent, Kado          | Municipal | FCT |
| 2185 | FCT/0234 | FCT/0234/S/4  | Zagbayi Pharmacy Ltd.                 | Pharmacy              | Plot 855 Tafawa Balawa Way Area 11                                   | Municipal | FCT |
| 2186 | FCT/0236 | FCT/0236/S/4  | Health Harbour Pharmacy,              | Pharmacy              | 12/14 Maitama Sule Street, Opp. O.A.U. Qtrs., Asokoro                | Municipal | FCT |
| 2187 | FCT/0238 | FCT/0238/S/4  | Giems Forture Ltd. Pharmacy Div.      | Pharmacy              | Plot D 232 Road By 231 Crescent Kado Housing Estate.                 | Municipal | FCT |
| 2188 | FCT/0240 | FCT/0240/S/4  | Patigah Pharmacy Ltd.EffurunOvwie     | Pharmacy              | Plot 2149 Novakcott Str. Wuse Zone 1                                 | Municipal | FCT |
| 2189 | FCT/0241 | FCT/0241/S/5  | Winners Medical Diag. & Herbal Centre | Laboratory            | Plot 139, Kadonger Close, Garki II Opp. Cbn.                         | Municipal | FCT |
| 2190 | FCT/0242 | FCT/0242/S/5  | Adonai Laboratory                     | Laboratory            | Area 7, (Behind Arts & Culture) Garki, Abuja                         | Municipal | FCT |
| 2191 | FCT/0258 | FCT/0258/S/4  | Beta Pharm Ltd.                       | Pharmacy              | Area 2, Shopping Complex Abuja Shopping Complex, Area 10, Garki      | Municipal | FCT |
| 2192 | FCT/0259 | FCT/0259/S/4  | Aldak Pharmacy                        | Pharmacy              | Plot 51, Ubiaja Cres. Opp CBN Snr., Staff quarters, Garki II, Abuja. | Municipal | FCT |
| 2193 | FCT/0263 | FCT/0263/S/4  | Zion Pharmacy                         | Pharmacy              | Suite 3 & 4, Beside Plaza, Off NEPA Camp Road, Apo, Area 1           | Municipal | FCT |
| 2194 | FCT/0266 | FCT/0266/S/4  | Aners Pharmaceuticals & Co.           | Pharmacy              | Jikwoyi Phase I, After Ashaka Cement,                                | Municipal | FCT |
| 2195 | FCT/0269 | FCT/0269/S/4  | Fhidu Pharmacy Ltd.                   | Pharmacy              | NICON Hilton Hotel, Maitama, Abuja                                   | Municipal | FCT |
| 2196 | FCT/0275 | FCT/0275/S/15 | Clear View Optics Ltd.                | Ophthalmology         | Suite A9, Poly Plaza Near Ap Plaza, Wuse II, Abuja                   | Municipal | FCT |
| 2197 | FCT/0285 | FCT/0285/S/8  | Calens Dental Clinics                 | Dental                | Ahmadu Bello Way, Plot 1249, Opp. Standard Trust Bank.               | Municipal | FCT |
| 2198 | FCT/0296 | FCT/0296/S/15 | Nuns Eye Centre                       | Ophthalmology         | Plot 211M, Garki Cornershops, Garki, Abuja                           | Municipal | FCT |
| 2199 | FCT/0302 | FCT/0302/S/5  | Tayodek Diagnostics                   | Radiology, Laboratory | Plot 211M, Garki Cornershops, Garki, Abuja                           | Municipal | FCT |
| 2200 | FCT/0302 | FCT/0302/S/7  | Tayodek Diagnostics                   | Radiology, Laboratory | 739, Sheriff Plaza, Aminu Kano Crescent, Wuse II, Abuja              | Municipal | FCT |
| 2201 | FCT/0310 | FCT/0310/S/4  | Becan Pharmacy Ltd.                   | Pharmacy              | Fabdal Shopping Complex, Suite 105, Wuse Zone 4, Abuja               | Municipal | FCT |
| 2202 | FCT/0311 | FCT/0311/S/4  | Rhosag Pharmacy                       | Pharmacy              | Shop 20, Wuse Neighbourhood Centre, Zone 3, Abuja                    | Municipal | FCT |
| 2203 | FCT/0312 | FCT/0312/S    | Pharmamedics Pharmacy Ltd.            | Pharmacy              | Shop E7, Emab Plaza 751 Aminu Kano Crescent, Wuse II, Abuja          | Municipal | FCT |
| 2204 | FCT/0313 | FCT/0313/S    | Junox ABC Nig. Ltd.,                  | Pharmacy              | Wuse Shopping Centre Abuja                                           | Municipal | FCT |
| 2205 | FCT/0316 | FCT/0316/S/4  | C.O.D.Chemists                        | Pharmacy              | Shop 5 & 10 Plot 59011 Adetokumbo Ademola Cret Wuse II Abuja         | Municipal | FCT |
| 2206 | FCT/0318 | FCT/0318/S/4  | Lawcas Pharmacy                       | Pharmacy              | Sheraton Hotel Wuse Zone 4, Abuja                                    | Municipal | FCT |
| 2207 | FCT/0319 | FCT/0319/S/4  | Agape Pharmacy                        | Pharmacy              | Corner Shop 43 Mambilo Wuse Zone 2 Abuja                             | Municipal | FCT |
| 2208 | FCT/0320 | FCT/0320/S/4  | Lifewares Pharmacy                    | Pharmacy              | D9/10 Sky Memorial Complex Wuse Zone 5 Abuja                         | Municipal | FCT |
| 2209 | FCT/0321 | FCT/0321/S/4  | Skylark Pharmacy & Chem. Co. Ltd      | Pharmacy              | Poly Plaza By Ap Plaza Wuse II Abuja                                 | Municipal | FCT |
| 2210 | FCT/0322 | FCT/0322/S/4  | Paxs Pharmacy                         | Pharmacy              | 5, Ladi Kwali Street, Wuse Zone 4 Abuja                              | Municipal | FCT |
| 2211 | FCT/0323 | FCT/0323/S/4  | Eutrix Pharmaceuticals Ltd            | Pharmacy              | Finance Qtrs, Complex Plot 817 Wuye District Abuja                   | Municipal | FCT |
| 2212 | FCT/0324 | FCT/0324/S/4  | Ace Pharmaceutical Co. Ltd            | Pharmacy              | Central Area                                                         | Municipal | FCT |
| 2213 | FCT/0330 | FCT/0330/S/4  | National Hospital Abuja               |                       | Central Area                                                         | Municipal | FCT |
| 2214 | FCT/0330 | FCT/0330/S/1  | National Hospital Abuja               |                       | Central Area                                                         | Municipal | FCT |
| 2215 | FCT/0330 | FCT/0330/S/10 | National Hospital Abuja               |                       | Central Area                                                         | Municipal | FCT |



|      |          |               |                                            |  |                                                                     |            |     |
|------|----------|---------------|--------------------------------------------|--|---------------------------------------------------------------------|------------|-----|
| 2216 | FCT/0330 | FCT/0330/S/12 | National Hospital Abuja                    |  | Central Area                                                        | Municipal  | FCT |
| 2217 | FCT/0330 | FCT/0330/S/3  | National Hospital Abuja                    |  | Central Area                                                        | Municipal  | FCT |
| 2218 | FCT/0330 | FCT/0330/S/6  | National Hospital Abuja                    |  | Central Area                                                        | Municipal  | FCT |
| 2219 | FCT/0330 | FCT/0330/S/11 | National Hospital Abuja                    |  | Central Area                                                        | Municipal  | FCT |
| 2220 | FCT/0330 | FCT/0330/S/15 | National Hospital Abuja                    |  | Central Area                                                        | Municipal  | FCT |
| 2221 | FCT/0330 | FCT/0330/S/5  | National Hospital Abuja                    |  | Central Area                                                        | Municipal  | FCT |
| 2222 | FCT/0333 | FCT/0333/S/5  | Albert Horsfall Med. Centre                |  | NIA Hq, off Muritala Mohammed way, near Danata & Sawoe, Garki       | Municipal  | FCT |
| 2223 | FCT/0333 | FCT/0333/S/14 | Albert Horsfall Med. Centre                |  | NIA Hq, off Muritala Mohammed way, near Danata & Sawoe, Garki       | Municipal  | FCT |
| 2224 | FCT/0333 | FCT/0333/S/4  | Albert Horsfall Med. Centre                |  | NIA Hq, off Muritala Mohammed way, near Danata & Sawoe, Garki       | Municipal  | FCT |
| 2225 | FCT/0333 | FCT/0333/S/8  | Albert Horsfall Med. Centre                |  | NIA Hq, off Muritala Mohammed way, near Danata & Sawoe, Garki       | Municipal  | FCT |
| 2226 | FCT/0334 | FCT/0334/S/4  | Defence Intelligence Agency                |  | Asokoro                                                             | Municipal  | FCT |
| 2227 | FCT/0334 | FCT/0334/S/5  | Defence Intelligence Agency                |  | Asokoro                                                             | Municipal  | FCT |
| 2228 | FCT/0335 | FCT/0335/S/5  | Revenue Mobilization & Fiscal              |  | 210 Tafawa Balewa Way, Central Area, Garki                          | Municipal  | FCT |
| 2229 | FCT/0336 | FCT/0336/S/6  | Living Stream Specialist Hospi             |  | 43/45, Street A, Phase I, off University Rd, Gwagwalada             | Gwagwalada | FCT |
| 2230 | FCT/0336 | FCT/0336/S/14 | Living Stream Specialist Hospi             |  | 43/45, Street A, Phase I, off University Rd, Gwagwalada             | Gwagwalada | FCT |
| 2231 | FCT/0336 | FCT/0336/S/3  | Living Stream Specialist Hospi             |  | 43/45, Street A, Phase I, off University Rd, Gwagwalada             | Gwagwalada | FCT |
| 2232 | FCT/0336 | FCT/0336/S/5  | Living Stream Specialist Hospi             |  | 43/45, Street A, Phase I, off University Rd, Gwagwalada             | Gwagwalada | FCT |
| 2233 | FCT/0337 | FCT/0337/S/6  | Angelic Care Hospital & Mat.               |  | 19, Ngwa close off Funmilayo Ransome Kuti Road, Garki Area 3, Abuja | Municipal  | FCT |
| 2234 | FCT/0337 | FCT/0337/S/3  | Angelic Care Hospital & Mat.               |  | 19, Ngwa close off Funmilayo Ransome Kuti Road, Garki Area 3, Abuja | Municipal  | FCT |
| 2235 | FCT/0337 | FCT/0337/S/5  | Angelic Care Hospital & Mat.               |  | 19, Ngwa close off Funmilayo Ransome Kuti Road, Garki Area 3, Abuja | Municipal  | FCT |
| 2236 | FCT/0340 | FCT/0340/S/4  | DSS Medical Centre.                        |  | VGC, Opposite National Military Cemetary, Airport Road, Abuja       | Municipal  | FCT |
| 2237 | FCT/0340 | FCT/0340/S/6  | DSS Medical Centre.                        |  | VGC, Opposite National Military Cemetary, Airport Road, Abuja       | Municipal  | FCT |
| 2238 | FCT/0340 | FCT/0340/S/3  | DSS Medical Centre.                        |  | VGC, Opposite National Military Cemetary, Airport Road, Abuja       | Municipal  | FCT |
| 2239 | FCT/0340 | FCT/0340/S/2  | DSS Medical Centre.                        |  | VGC, Opposite National Military Cemetary, Airport Road, Abuja       | Municipal  | FCT |
| 2240 | FCT/0340 | FCT/0340/S/1  | DSS Medical Centre.                        |  | VGC, Opposite National Military Cemetary, Airport Road, Abuja       | Municipal  | FCT |
| 2241 | FCT/0340 | FCT/0340/S/5  | DSS Medical Centre.                        |  | VGC, Opposite National Military Cemetary, Airport Road, Abuja       | Municipal  | FCT |
| 2242 | FCT/0340 | FCT/0340/S/7  | DSS Medical Centre.                        |  | VGC, Opposite National Military Cemetary, Airport Road, Abuja       | Municipal  | FCT |
| 2243 | FCT/0344 | FCT/0344/S/4  | Nigeria Customs Service Med. Centre - Karu |  | Karu Customs Barracks, Abuja                                        | Municipal  | FCT |
| 2244 | FCT/0346 | FCT/0346/S/3  | 108 Nigerian Air Force Hospital Abuja      |  | 108 Nigerian Air Force Hospital Abuja                               | Municipal  | FCT |
| 2245 | FCT/0346 | FCT/0346/S/1  | 108 Nigerian Air Force Hospital Abuja      |  | 108 Nigerian Air Force Hospital Abuja                               | Municipal  | FCT |
| 2246 | FCT/0346 | FCT/0346/S/10 | 108 Nigerian Air Force Hospital Abuja      |  | 108 Nigerian Air Force Hospital Abuja                               | Municipal  | FCT |
| 2247 | FCT/0346 | FCT/0346/S/5  | 108 Nigerian Air Force Hospital Abuja      |  | 108 Nigerian Air Force Hospital Abuja                               | Municipal  | FCT |
| 2248 | FCT/0346 | FCT/0346/S/4  | 108 Nigerian Air Force Hospital Abuja      |  | 108 Nigerian Air Force Hospital Abuja                               | Municipal  | FCT |
| 2249 | FCT/0346 | FCT/0346/S/6  | 108 Nigerian Air Force Hospital Abuja      |  | 108 Nigerian Air Force Hospital Abuja                               | Municipal  | FCT |
| 2250 | FCT/0346 | FCT/0346/S/2  | 108 Nigerian Air Force Hospital Abuja      |  | 108 Nigerian Air Force Hospital Abuja                               | Municipal  | FCT |

|      |          |               |                                                              |                  |                                                                          |           |     |
|------|----------|---------------|--------------------------------------------------------------|------------------|--------------------------------------------------------------------------|-----------|-----|
| 2251 | FCT/0346 | FCT/0346/S/8  | 108 Nigerian Air Force Hospital Abuja                        |                  | 108 Nigerian Air Force Hospital Abuja                                    | Municipal | FCT |
| 2252 | FCT/0346 | FCT/0346/S/11 | 108 Nigerian Air Force Hospital Abuja                        |                  | 108 Nigerian Air Force Hospital Abuja                                    | Municipal | FCT |
| 2253 | FCT/0352 | FCT/0352/S/4  | Cameb Pharmacy                                               | Pharmacy         | Opp. ECWA Church, Mpape, Abuja.                                          | Municipal | FCT |
| 2254 | FCT/0357 | FCT/0357/S/2  | Bwari General Hospital                                       |                  | Kawu Road, Bwari, FCT, Abuja                                             | Bwari     | FCT |
| 2255 | FCT/0357 | FCT/0357/S/4  | Bwari General Hospital                                       |                  | Kawu Road, Bwari, FCT, Abuja                                             | Bwari     | FCT |
| 2256 | FCT/0357 | FCT/0357/S/1  | Bwari General Hospital                                       |                  | Kawu Road, Bwari, FCT, Abuja                                             | Bwari     | FCT |
| 2257 | FCT/0357 | FCT/0357/S/5  | Bwari General Hospital                                       |                  | Kawu Road, Bwari, FCT, Abuja                                             | Bwari     | FCT |
| 2258 | FCT/0358 | FCT/0358/S/4  | Fredway Pharmaceuticals Ltd                                  | Pharmacy         | Plot A Jacob Ngbako Road, Kubwa, Abuja                                   | Bwari     | FCT |
| 2259 | FCT/0360 | FCT/0360/S/4  | Abuja Clininc - Karu                                         |                  | Karu, Abuja                                                              | Municipal | FCT |
| 2260 | FCT/0362 | FCT/0362/S/1  | G & S Specialist Clinic                                      |                  | 8B Rhine Street (Opp. IBB Way), Maitama                                  | Municipal | FCT |
| 2261 | FCT/0362 | FCT/0362/S/5  | G & S Specialist Clinic                                      |                  | 8B Rhine Street (Opp. IBB Way), Maitama                                  | Municipal | FCT |
| 2262 | FCT/0366 | FCT/0366/S/3  | Saffron Hospital Ltd.                                        |                  | 1 KM, Left Off Checkpoint, Abuja-Keffi Expressway, Phase IV, Nyanya, FCT | Municipal | FCT |
| 2263 | FCT/0366 | FCT/0366/S/5  | Saffron Hospital Ltd.                                        |                  | 1 KM, Left Off Checkpoint, Abuja-Keffi Expressway, Phase IV, Nyanya, FCT | Municipal | FCT |
| 2264 | FCT/0366 | FCT/0366/S/4  | Saffron Hospital Ltd.                                        |                  | 1 KM, Left Off Checkpoint, Abuja-Keffi Expressway, Phase IV, Nyanya, FCT | Municipal | FCT |
| 2265 | FCT/0378 | FCT/0378/S/6  | Horizons Medical Centre                                      | Primary Provider | Plot 777 Bouake Street Wuse Zone 6, Abuja                                | Municipal | FCT |
| 2266 | FCT/0378 | FCT/0378/S/5  | Horizons Medical Centre                                      | Primary Provider | Plot 777 Bouake Street Wuse Zone 6, Abuja                                | Municipal | FCT |
| 2267 | FCT/0378 | FCT/0378/S/14 | Horizons Medical Centre                                      | Primary Provider | Plot 777 Bouake Street Wuse Zone 6, Abuja                                | Municipal | FCT |
| 2268 | FCT/0378 | FCT/0378/S/1  | Horizons Medical Centre                                      | Primary Provider | Plot 777 Bouake Street Wuse Zone 6, Abuja                                | Municipal | FCT |
| 2269 | FCT/0378 | FCT/0378/S/3  | Horizons Medical Centre                                      | Primary Provider | Plot 777 Bouake Street Wuse Zone 6, Abuja                                | Municipal | FCT |
| 2270 | FCT/0378 | FCT/0378/S/2  | Horizons Medical Centre                                      | Primary Provider | Plot 777 Bouake Street Wuse Zone 6, Abuja                                | Municipal | FCT |
| 2271 | FCT/0379 | FCT/0379/S/4  | Bepos Clinic & Maternity                                     | Primary Provider | 10, Faskari Street Area 3 Garki Abuja                                    | Municipal | FCT |
| 2272 | FCT/0379 | FCT/0379/S/5  | Bepos Clinic & Maternity                                     | Primary Provider | 10, Faskari Street Area 3 Garki Abuja                                    | Municipal | FCT |
| 2273 | FCT/0379 | FCT/0379/S/2  | Bepos Clinic & Maternity                                     | Primary Provider | 10, Faskari Street Area 3 Garki Abuja                                    | Municipal | FCT |
| 2274 | FCT/0379 | FCT/0379/S/3  | Bepos Clinic & Maternity                                     | Primary Provider | 10, Faskari Street Area 3 Garki Abuja                                    | Municipal | FCT |
| 2275 | FCT/0381 | FCT/0381/S/5  | National Commission for Colleges of Education (NCCE) Staff C | Primary Provider | NCCE Management Staff Quarters Mabushi Wuse II Abuja                     | Municipal | FCT |
| 2276 | FCT/0385 | FCT/0385/S/14 | Well Point Clinic                                            |                  | House 1, Road 45, Off 1st Ave, Gwarinpa                                  | Municipal | FCT |
| 2277 | FCT/0385 | FCT/0385/S/5  | Well Point Clinic                                            |                  | House 1, Road 45, Off 1st Ave, Gwarinpa                                  | Municipal | FCT |
| 2278 | FCT/0385 | FCT/0385/S/1  | Well Point Clinic                                            |                  | House 1, Road 45, Off 1st Ave, Gwarinpa                                  | Municipal | FCT |
| 2279 | FCT/0385 | FCT/0385/S/2  | Well Point Clinic                                            |                  | House 1, Road 45, Off 1st Ave, Gwarinpa                                  | Municipal | FCT |
| 2280 | FCT/0385 | FCT/0385/S/6  | Well Point Clinic                                            |                  | House 1, Road 45, Off 1st Ave, Gwarinpa                                  | Municipal | FCT |
| 2281 | FCT/0385 | FCT/0385/S/3  | Well Point Clinic                                            |                  | House 1, Road 45, Off 1st Ave, Gwarinpa                                  | Municipal | FCT |
| 2282 | FCT/0387 | FCT/0387/S/3  | Ronella Specialist Hospital                                  |                  | 51 Crescent Road, Flat 3, Phase IV, Kubwa, Abuja                         | Bwari     | FCT |
| 2283 | FCT/0389 | FCT/0389/S/13 | Rainbow Clinic & Maternity                                   |                  | Plot 218, Gudu District Apo Qtrs Garki, Abuja                            | Municipal | FCT |
| 2284 | FCT/0389 | FCT/0389/S/6  | Rainbow Clinic & Maternity                                   |                  | Plot 218, Gudu District Apo Qtrs Garki, Abuja                            | Municipal | FCT |
| 2285 | FCT/0389 | FCT/0389/S/5  | Rainbow Clinic & Maternity                                   |                  | Plot 218, Gudu District Apo Qtrs Garki, Abuja                            | Municipal | FCT |
| 2286 | FCT/0389 | FCT/0389/S/3  | Rainbow Clinic & Maternity                                   |                  | Plot 218, Gudu District Apo Qtrs Garki, Abuja                            | Municipal | FCT |
| 2287 | FCT/0389 | FCT/0389/S/8  | Rainbow Clinic & Maternity                                   |                  | Plot 218, Gudu District Apo Qtrs Garki, Abuja                            | Municipal | FCT |
| 2288 | FCT/0389 | FCT/0389/S/1  | Rainbow Clinic & Maternity                                   |                  | Plot 218, Gudu District Apo Qtrs Garki, Abuja                            | Municipal | FCT |
| 2289 | FCT/0390 | FCT/0390/S/2  | Federal Staff Hospital - Jabi                                |                  | Airport Road, Jabi                                                       | Municipal | FCT |
| 2290 | FCT/0390 | FCT/0390/S/3  | Federal Staff Hospital - Jabi                                |                  | Airport Road, Jabi                                                       | Municipal | FCT |
| 2291 | FCT/0390 | FCT/0390/S/6  | Federal Staff Hospital - Jabi                                |                  | Airport Road, Jabi                                                       | Municipal | FCT |

|      |          |               |                                       |            |                                                                              |            |     |
|------|----------|---------------|---------------------------------------|------------|------------------------------------------------------------------------------|------------|-----|
| 2292 | FCT/0390 | FCT/0390/S/1  | Federal Staff Hospital - Jabi         |            | Airport Road, Jabi                                                           | Municipal  | FCT |
| 2293 | FCT/0391 | FCT/0391/S/1  | Everlasting Care Hospital Limited     |            | Plot 643 Gimbia Street, Area II, Garki, Abuja                                | Municipal  | FCT |
| 2294 | FCT/0391 | FCT/0391/S/3  | Everlasting Care Hospital Limited     |            | Plot 643 Gimbia Street, Area II, Garki, Abuja                                | Municipal  | FCT |
| 2295 | FCT/0391 | FCT/0391/S/5  | Everlasting Care Hospital Limited     |            | Plot 643 Gimbia Street, Area II, Garki, Abuja                                | Municipal  | FCT |
| 2296 | FCT/0392 | FCT/0392/S/3  | Micheal Cross Specialist Hospital     |            | Plot FG Church Road, Karu Site, Karu, Abuja                                  | Municipal  | FCT |
| 2297 | FCT/0393 | FCT/0393/S/2  | Convenant Clinic & Maternity          |            | Anygba Street Opp NTA Area 11 Garki                                          | Municipal  | FCT |
| 2298 | FCT/0393 | FCT/0393/S/1  | Convenant Clinic & Maternity          |            | Anygba Street Opp NTA Area 11 Garki                                          | Municipal  | FCT |
| 2299 | FCT/0393 | FCT/0393/S/3  | Convenant Clinic & Maternity          |            | Anygba Street Opp NTA Area 11 Garki                                          | Municipal  | FCT |
| 2300 | FCT/0394 | FCT/0394/S/2  | St Mary Catholic Hospital, Gwagwalada |            | No 1 FRCN Road, Opposite Police Station Gwagwalada                           | Gwagwalada | FCT |
| 2301 | FCT/0394 | FCT/0394/S/7  | St Mary Catholic Hospital, Gwagwalada |            | No 1 FRCN Road, Opposite Police Station Gwagwalada                           | Gwagwalada | FCT |
| 2302 | FCT/0394 | FCT/0394/S/6  | St Mary Catholic Hospital, Gwagwalada |            | No 1 FRCN Road, Opposite Police Station Gwagwalada                           | Gwagwalada | FCT |
| 2303 | FCT/0394 | FCT/0394/S/4  | St Mary Catholic Hospital, Gwagwalada |            | No 1 FRCN Road, Opposite Police Station Gwagwalada                           | Gwagwalada | FCT |
| 2304 | FCT/0394 | FCT/0394/S/15 | St Mary Catholic Hospital, Gwagwalada |            | No 1 FRCN Road, Opposite Police Station Gwagwalada                           | Gwagwalada | FCT |
| 2305 | FCT/0394 | FCT/0394/S/1  | St Mary Catholic Hospital, Gwagwalada |            | No 1 FRCN Road, Opposite Police Station Gwagwalada                           | Gwagwalada | FCT |
| 2306 | FCT/0394 | FCT/0394/S/5  | St Mary Catholic Hospital, Gwagwalada |            | No 1 FRCN Road, Opposite Police Station Gwagwalada                           | Gwagwalada | FCT |
| 2307 | FCT/0395 | FCT/0395/S/5  | Precious Clinic & Maternity           |            | House 57, 1st Avenue FHA, Lugbe, Abuja                                       | Municipal  | FCT |
| 2308 | FCT/0406 | FCT/0406/S/5  | Usoh Medical Diagnostic Lab.          | Laboratory | Area 2 Section 2, Bacita, Close, Garki ,Abuja                                | Municipal  | FCT |
| 2309 | FCT/0407 | FCT/0407/S/8  | The Kings Dental Clinic               | Dental     | Suite 7A Garki II, Cornershop Garki II, Abuja                                | Municipal  | FCT |
| 2310 | FCT/0408 | FCT/0408/S/13 | Newforesight Vision Eye Clinic        | Optometry  | Nig. Agric & Rural Dev. Complex, 2B Herbert Marculay Way, Wuse Zone 3, Abuja | Municipal  | FCT |
| 2311 | FCT/0409 | FCT/0409/S/13 | Lord's Eye Clinic                     | Optometry  | 78 Abigan Street, Wuse Zone 3, Abuja                                         | Municipal  | FCT |
| 2312 | FCT/0410 | FCT/0410/S/8  | Kapital Dental Centre                 | Dental     | suite 3 Area 3 Neighbourhood Centre ,Garki, Abuja                            | Municipal  | FCT |
| 2313 | FCT/0411 | FCT/0411/S/4  | Melrose Pharmaceutical Stores         | Pharmacy   | Suite 1A Angels Plaza, Garki II, Abuja                                       | Municipal  | FCT |
| 2314 | FCT/0412 | FCT/0412/S/4  | Zagbaya Pharmacy Nig. Ltd.            | Pharmacy   | Famag-Jal Plaza, wuse Zone 3 Branch                                          | Municipal  | FCT |
| 2315 | FCT/0413 | FCT/0413/S/4  | Federal Ministry Of Defence Clinic    | Pharmacy   | Ship House Premises, Defence H/quarters, Abuja                               | Municipal  | FCT |
| 2316 | FCT/0414 | FCT/0414/S/4  | Ronybo Pharmacy                       | Pharmacy   | Blessed Plaza, Opposite Customs Clinic, Karu                                 | Municipal  | FCT |
| 2317 | FCT/0418 | FCT/0418/S/4  | Medixal Pharmacy Nig Ltd.             | Pharmacy   | Around Floor, Essence Plaza, Wuse Zone 6, Abuja                              | Municipal  | FCT |
| 2318 | FCT/0419 | FCT/0419/S/4  | Cuteman Pharmacy & Stores             | Pharmacy   | Asb Shopping Plaza, Ademola Adetokunmbo Crescent Wuse II, Abuja              | Municipal  | FCT |
| 2319 | FCT/0421 | FCT/0421/S/4  | Excellent Vision Eye Centre           | Pharmacy   | Metro Plaza, Anex Central Area, Abuja                                        | Municipal  | FCT |
| 2320 | FCT/0422 | FCT/0422/S/4  | Sterling Pharmacy Ltd                 | Pharmacy   | Suite 5 Dummec Plaza ,Area 1 Section 1                                       | Municipal  | FCT |
| 2321 | FCT/0424 | FCT/0424/S/4  | Azmu Pharmacy                         | Pharmacy   | Suite 8, Mangal Plaza, Plot 1466 Area 11, Garki, Abuja                       | Municipal  | FCT |
| 2322 | FCT/0425 | FCT/0425/S/4  | Kuje General Hospital                 |            | Kuje, Abuja.                                                                 | Kuje       | FCT |
| 2323 | FCT/0425 | FCT/0425/S/5  | Kuje General Hospital                 |            | Kuje, Abuja.                                                                 | Kuje       | FCT |
| 2324 | FCT/0425 | FCT/0425/S/3  | Kuje General Hospital                 |            | Kuje, Abuja.                                                                 | Kuje       | FCT |
| 2325 | FCT/0425 | FCT/0425/S/1  | Kuje General Hospital                 |            | Kuje, Abuja.                                                                 | Kuje       | FCT |
| 2326 | FCT/0425 | FCT/0425/S/2  | Kuje General Hospital                 |            | Kuje, Abuja.                                                                 | Kuje       | FCT |
| 2327 | FCT/0426 | FCT/0426/S/4  | Nigerian Customs Medical Centre       | Pharmacy   | Karu Customs Barracks, Karu                                                  | Municipal  | FCT |
| 2328 | FCT/0428 | FCT/0428/S/4  | Trumed Pharm & Health Shop            | Pharmacy   | Suite 103,                                                                   | Municipal  | FCT |

|      |          |               |                                                   |                          |                                                                                  |            |     |
|------|----------|---------------|---------------------------------------------------|--------------------------|----------------------------------------------------------------------------------|------------|-----|
| 2329 | FCT/0430 | FCT/0430/S/5  | Carmel Wood Med. Clinic                           | O&G, Laboratory, Surgery | 31, 1st Avenue, Kado Estate, Abuja                                               | Municipal  | FCT |
| 2330 | FCT/0430 | FCT/0430/S/1  | Carmel Wood Med. Clinic                           | O&G, Laboratory, Surgery | 31, 1st Avenue, Kado Estate, Abuja                                               | Municipal  | FCT |
| 2331 | FCT/0430 | FCT/0430/S/3  | Carmel Wood Med. Clinic                           | O&G, Laboratory, Surgery | 31, 1st Avenue, Kado Estate, Abuja                                               | Municipal  | FCT |
| 2332 | FCT/0431 | FCT/0431/S/4  | Luwa Pharmacy Ltd                                 | Pharmacy                 | 1st Avenue Opp Foreign Affairs Qtrs, Kado Baurko, Gwarinpa                       | Municipal  | FCT |
| 2333 | FCT/0433 | FCT/0433/S/4  | Maxi Pharmacy Ltd                                 | Pharmacy                 | Gwarinpa Plaza, 3rd Avenue, FHA, Abuja                                           | Municipal  | FCT |
| 2334 | FCT/0436 | FCT/0436/S/4  | Mak Angels Pharm.                                 | Pharmacy                 | FHA Phase I, Lugbe, Abuja                                                        | Municipal  | FCT |
| 2335 | FCT/0437 | FCT/0437/S/4  | Redemption Pharmacy                               | Pharmacy                 | FHA Phase I, Lugbe, Abuja                                                        | Municipal  | FCT |
| 2336 | FCT/0439 | FCT/0439/S/13 | First Optician Eye Clinic                         | Optometry                | Plot 855 Suite 205 DM Yadodo House, Opp. La Meridean Hotel, Area 11, Abuja       | Municipal  | FCT |
| 2337 | FCT/0440 | FCT/0440/S/4  | Jonik Pharmacy                                    | Pharmacy                 | Plot 780 Obafemi Awolowo Street, Area 11, Garki, Abuja                           | Municipal  | FCT |
| 2338 | FCT/0447 | FCT/0447/S/4  | Mubaraq Pharmacy                                  | Pharmacy                 | Suite 3 Maitama Shopping Complex                                                 | Municipal  | FCT |
| 2339 | FCT/0451 | FCT/0451/S/5  | Federal Staff Hospital                            | Laboratory               | National Assembly Qtrs., Zone E, Apo, Abuja                                      | Municipal  | FCT |
| 2340 | FCT/0452 | FCT/0452/S/4  | New Trends Pharmacy Ltd                           | Pharmacy                 | Plot 53, 321 Road, Gwarinpa, Abuja                                               | Municipal  | FCT |
| 2341 | FCT/0457 | FCT/0457/S/4  | Jonik Pharmacy Ltd                                | Pharmacy                 | Shop 2, Wuse II, Lifecamp, Abuja                                                 | Municipal  | FCT |
| 2342 | FCT/0458 | FCT/0458/S/4  | Nimilen Pharmacy Ltd                              | Pharmacy                 | Plot C7 off Deeper Life Junction, Sultan Dasuki Rd, Kubwa                        | Bwari      | FCT |
| 2343 | FCT/0459 | FCT/0459/S/4  | Emma-Ella Pharmacy Ltd                            | Pharmacy                 | No.1 Elite Shopping Complex, 26 Adua Close, off Tufashiya Cresc. Lifecamp, Abuja | Municipal  | FCT |
| 2344 | FCT/0460 | FCT/0460/S/4  | Rayjones Pharmacy Ltd                             | Pharmacy                 | Hamza Abdullahi/Byazhin Junction, Kubwa village, Abuja                           | Bwari      | FCT |
| 2345 | FCT/0462 | FCT/0462/S/13 | Spendour Vixion Eye Clinic                        | Optometry                | Gubabi SHFE Plaza, Utako Modern Market, Abuja                                    | Municipal  | FCT |
| 2346 | FCT/0471 | FCT/0471/S/9  | Recovery Psychiatry Services                      | Psychiatry               | C/o Zankli Hospital Premises, Opp. Fed. Min. of Works, Mabushi, Abuja            | Municipal  | FCT |
| 2347 | FCT/0472 | FCT/0472/S/5  | Dr. Hassans Clinic/Diagnostic Centre              |                          | 9 Njamena Street, off Aminu Kano Crescent, Wuse II, Abuja                        | Municipal  | FCT |
| 2348 | FCT/0478 | FCT/0478/S/4  | University of Abuja Teaching Hospital, Gwagwalada |                          | Abuja                                                                            | Gwagwalada | FCT |
| 2349 | FCT/0478 | FCT/0478/S/6  | University of Abuja Teaching Hospital, Gwagwalada |                          | Abuja                                                                            | Gwagwalada | FCT |
| 2350 | FCT/0478 | FCT/0478/S/3  | University of Abuja Teaching Hospital, Gwagwalada |                          | Abuja                                                                            | Gwagwalada | FCT |
| 2351 | FCT/0478 | FCT/0478/S/1  | University of Abuja Teaching Hospital, Gwagwalada |                          | Abuja                                                                            | Gwagwalada | FCT |
| 2352 | FCT/0478 | FCT/0478/S/8  | University of Abuja Teaching Hospital, Gwagwalada |                          | Abuja                                                                            | Gwagwalada | FCT |
| 2353 | FCT/0478 | FCT/0478/S/5  | University of Abuja Teaching Hospital, Gwagwalada |                          | Abuja                                                                            | Gwagwalada | FCT |
| 2354 | FCT/0478 | FCT/0478/S/2  | University of Abuja Teaching Hospital, Gwagwalada |                          | Abuja                                                                            | Gwagwalada | FCT |
| 2355 | FCT/0478 | FCT/0478/S/15 | University of Abuja Teaching Hospital, Gwagwalada |                          | Abuja                                                                            | Gwagwalada | FCT |
| 2356 | FCT/0486 | FCT/0486/S/5  | Federal Road Safety Commission Medical Centre     |                          | Plot 18 Cotonou Crescent, Wuse Zone 6, Abuja                                     | Municipal  | FCT |
| 2357 | FCT/0486 | FCT/0486/S/4  | Federal Road Safety Commission Medical Centre     |                          | Plot 18 Cotonou Crescent, Wuse Zone 6, Abuja                                     | Municipal  | FCT |
| 2358 | FCT/0491 | FCT/0491/S/4  | Freedom Hospital & Health Consultants             |                          | 405 Phase III Road, Kubwa                                                        | Bwari      | FCT |
| 2359 | FCT/0495 | FCT/0495/S/2  | Allied Surgery                                    |                          | Off Specialist Hospital Road, Behind Charismatic Revival Church, Gwagwalada      | Gwagwalada | FCT |

|      |          |               |                                                              |                 |                                                                             |            |     |
|------|----------|---------------|--------------------------------------------------------------|-----------------|-----------------------------------------------------------------------------|------------|-----|
| 2360 | FCT/0495 | FCT/0495/S/1  | Allied Surgery                                               |                 | Off Specialist Hospital Road, Behind Charismatic Revival Church, Gwagwalada | Gwagwalada | FCT |
| 2361 | FCT/0495 | FCT/0495/S/10 | Allied Surgery                                               |                 | Off Specialist Hospital Road, Behind Charismatic Revival Church, Gwagwalada | Gwagwalada | FCT |
| 2362 | FCT/0495 | FCT/0495/S/7  | Allied Surgery                                               |                 | Off Specialist Hospital Road, Behind Charismatic Revival Church, Gwagwalada | Gwagwalada | FCT |
| 2363 | FCT/0495 | FCT/0495/S/3  | Allied Surgery                                               |                 | Off Specialist Hospital Road, Behind Charismatic Revival Church, Gwagwalada | Gwagwalada | FCT |
| 2364 | FCT/0498 | FCT/0498/S/4  | NIPRID Staff Clinic                                          |                 | NIPRID, Idu, Abuja                                                          | Municipal  | FCT |
| 2365 | FCT/0498 | FCT/0498/S/5  | NIPRID Staff Clinic                                          |                 | NIPRID, Idu, Abuja                                                          | Municipal  | FCT |
| 2366 | FCT/0510 | FCT/0510/S/3  | Northland Medical Centre                                     |                 | Okata House Off Old Karu Road, Nyanya, Abuja                                | Municipal  | FCT |
| 2367 | FCT/0512 | FCT/0512/S/8  | Bethel Dental Clinic                                         | Dental, Surgery | Nwora Plaza, Plot 1103 Aminu Kano Crescent, Wuse II, Abuja                  | Municipal  | FCT |
| 2368 | FCT/0513 | FCT/0513/S/5  | Revenue Mobilization, Allocation and Fiscal Commission Staff | Laboratory      | Plot 210 Tafawa Balewa Way, Central District, Abuja                         | Municipal  | FCT |
| 2369 | FCT/0514 | FCT/0514/S/4  | ABM Pharmacy                                                 | Pharmacy        | Shop 44 NYSC Camp Road, Kubwa, Abuja                                        | Bwari      | FCT |
| 2370 | FCT/0516 | FCT/0516/S/5  | Unique Medical Diagnosis Centre Laboratory                   | Laboratory      | G.S.S. Road, Phase IV, Kubwa, Abuja                                         | Bwari      | FCT |
| 2371 | FCT/0518 | FCT/0518/S/4  | Tarei Pharmacy Ltd                                           | Pharmacy        | 73, First Gate, Dutse Alhaji, Abuja                                         | Bwari      | FCT |
| 2372 | FCT/0521 | FCT/0521/S/4  | Brado Pharmacy                                               | Pharmacy        | 17B Kwame Nkrumah Crescent, Asokoro                                         | Municipal  | FCT |
| 2373 | FCT/0525 | FCT/0525/S/5  | Rhemma Foundation Hospital, Kwali                            | Laboratory      | Kwali                                                                       | Kwali      | FCT |
| 2374 | FCT/0526 | FCT/0526/S/4  | Rapy Galmac Pharmacy                                         | Pharmacy        | Shop 7, Secretariat Opposite Bank of the North, Kwali, Abuja                | Kwali      | FCT |
| 2375 | FCT/0527 | FCT/0527/S/4  | Cell Rich Pharmacy & Chemical Co. Ltd.                       | Pharmacy        | Shop No. 7 Along General Hospital Road, Kuje, Abuja                         | Kuje       | FCT |
| 2376 | FCT/0533 | FCT/0533/S/13 | Alpha Zone Eye Clinic                                        | Optometry       | Suite 17, Supreme Plaza Samuel Akintola Garki II                            | Municipal  | FCT |
| 2377 | FCT/0534 | FCT/0534/S/4  | Ja'cane Pharmacy Ltd.                                        | Pharmacy        | Plot E49 Nsukka Street Garki Village, Abuja                                 | Municipal  | FCT |
| 2378 | FCT/0535 | FCT/0535/S/4  | Steps Pharmacy                                               | Pharmacy        | FHA Phase II, Abuja                                                         | Municipal  | FCT |
| 2379 | FCT/0536 | FCT/0536/S/4  | OAK Chemical & Pharmacy Ltd.                                 | Pharmacy        | Plot 53 Adetokunbo Ademola Crescent, Wuse II, Abuja                         | Municipal  | FCT |
| 2380 | FCT/0538 | FCT/0538/S/4  | A Bay Pharmacy                                               | Pharmacy        | Suite No 8 Sabond Ale Plaza Jabi, Abuja                                     | Municipal  | FCT |
| 2381 | FCT/0539 | FCT/0539/S/5  | Excel Medical Laboratory Services                            | Laboratory      | Shop 110 Hill Side Area A, Nyanya, Abuja                                    | Municipal  | FCT |
| 2382 | FCT/0540 | FCT/0540/S/3  | Northerland Medical Laboratory                               | O&G             | Okeph House Old Karu Road, Nyanya Village, Abuja                            | Municipal  | FCT |
| 2383 | FCT/0546 | FCT/0546/S/5  | Garki Hospital                                               |                 | Area 8, Garki, Abuja                                                        | Municipal  | FCT |
| 2384 | FCT/0546 | FCT/0546/S/1  | Garki Hospital                                               |                 | Area 8, Garki, Abuja                                                        | Municipal  | FCT |
| 2385 | FCT/0546 | FCT/0546/S/2  | Garki Hospital                                               |                 | Area 8, Garki, Abuja                                                        | Municipal  | FCT |
| 2386 | FCT/0546 | FCT/0546/S/6  | Garki Hospital                                               |                 | Area 8, Garki, Abuja                                                        | Municipal  | FCT |
| 2387 | FCT/0546 | FCT/0546/S/7  | Garki Hospital                                               |                 | Area 8, Garki, Abuja                                                        | Municipal  | FCT |
| 2388 | FCT/0546 | FCT/0546/S/4  | Garki Hospital                                               |                 | Area 8, Garki, Abuja                                                        | Municipal  | FCT |
| 2389 | FCT/0546 | FCT/0546/S/3  | Garki Hospital                                               |                 | Area 8, Garki, Abuja                                                        | Municipal  | FCT |
| 2390 | FCT/0550 | FCT/0550/S/10 | Hillcrest Clinics                                            |                 | 19 Orau Street Off Nouakchott Street Wuse Zone 1                            | Municipal  | FCT |
| 2391 | FCT/0550 | FCT/0550/S/2  | Hillcrest Clinics                                            |                 | 19 Orau Street Off Nouakchott Street Wuse Zone 1                            | Municipal  | FCT |
| 2392 | FCT/0550 | FCT/0550/S/1  | Hillcrest Clinics                                            |                 | 19 Orau Street Off Nouakchott Street Wuse Zone 1                            | Municipal  | FCT |
| 2393 | FCT/0553 | FCT/0553/S/13 | Locus Eye Clinic                                             | Optometry       | Plot 645 Alex Ekwueme Way, Jabi District, Abuja                             | Municipal  | FCT |
| 2394 | FCT/0554 | FCT/0554/S/12 | Hi-Fi Clinics                                                |                 | 40 Suez Crescent, Ibrahim Abacha Estate Wuse Zone 4                         | Municipal  | FCT |
| 2395 | FCT/0556 | FCT/0556/S/1  | Fill Medical Centre                                          |                 | Plot 9 Gado Nasco Road, Phase II site II Kubwa                              | Bwari      | FCT |
| 2396 | FCT/0556 | FCT/0556/S/5  | Fill Medical Centre                                          |                 | Plot 9 Gado Nasco Road, Phase II site II Kubwa                              | Bwari      | FCT |
| 2397 | FCT/0560 | FCT/0560/S/15 | H J Eye Clinic and Optical Services                          | Ophthalmology   | Wuse II, Abuja                                                              | Municipal  | FCT |

|      |          |               |                                           |               |                                                                      |            |     |
|------|----------|---------------|-------------------------------------------|---------------|----------------------------------------------------------------------|------------|-----|
| 2398 | FCT/0563 | FCT/0563/S/15 | Fortress Hospital                         |               | 8 Gender Close, Off Gender Street, Wuse Zone 1                       | Municipal  | FCT |
| 2399 | FCT/0564 | FCT/0564/S/11 | Maj Physiotherapy & Rehabilitation        | Physiotherapy | 44 Oran Street, near Habib Bank Wuse Zone1                           | Municipal  | FCT |
| 2400 | FCT/0565 | FCT/0565/S/15 | Peniel Eye Clinic                         | Ophthalmology | Plot 541 Constitution Avenue, Behind ICPC, Central Business District | Municipal  | FCT |
| 2401 | FCT/0568 | FCT/0568/S/5  | University of Abuja Medical Centre, Abuja | CLINIC        | GWAGWALADA LGA                                                       | Gwagwalada | FCT |
| 2402 | FCT/0568 | FCT/0568/S/4  | University of Abuja Medical Centre, Abuja | CLINIC        | GWAGWALADA LGA                                                       | Gwagwalada | FCT |
| 2403 | FCT/0573 | FCT/0573/S/2  | Kelina Medical Center                     |               | 116, 3rd Avenue, Gwarinpa Estate                                     | Municipal  | FCT |
| 2404 | FCT/0573 | FCT/0573/S/5  | Kelina Medical Center                     |               | 116, 3rd Avenue, Gwarinpa Estate                                     | Municipal  | FCT |
| 2405 | FCT/0573 | FCT/0573/S/4  | Kelina Medical Center                     |               | 116, 3rd Avenue, Gwarinpa Estate                                     | Municipal  | FCT |
| 2406 | FCT/0573 | FCT/0573/S/1  | Kelina Medical Center                     |               | 116, 3rd Avenue, Gwarinpa Estate                                     | Municipal  | FCT |
| 2407 | FCT/0573 | FCT/0573/S/12 | Kelina Medical Center                     |               | 116, 3rd Avenue, Gwarinpa Estate                                     | Municipal  | FCT |
| 2408 | FCT/0573 | FCT/0573/S/3  | Kelina Medical Center                     |               | 116, 3rd Avenue, Gwarinpa Estate                                     | Municipal  | FCT |
| 2409 | FCT/0573 | FCT/0573/S/6  | Kelina Medical Center                     |               | 116, 3rd Avenue, Gwarinpa Estate                                     | Municipal  | FCT |
| 2410 | FCT/0575 | FCT/0575/S/7  | Clinic Care Medical Services              |               | 35 Nouakchott Street, Wuse Zone 1                                    | Municipal  | FCT |
| 2411 | FCT/0575 | FCT/0575/S/2  | Clinic Care Medical Services              |               | 35 Nouakchott Street, Wuse Zone 1                                    | Municipal  | FCT |
| 2412 | FCT/0575 | FCT/0575/S/5  | Clinic Care Medical Services              |               | 35 Nouakchott Street, Wuse Zone 1                                    | Municipal  | FCT |
| 2413 | FCT/0575 | FCT/0575/S/1  | Clinic Care Medical Services              |               | 35 Nouakchott Street, Wuse Zone 1                                    | Municipal  | FCT |
| 2414 | FCT/0581 | FCT/0581/S/4  | Estal Pharmacy Limited                    | Pharmacy      | Shop 10 Blessed Plaza, Opp Custom Quarters Karu                      | Municipal  | FCT |
| 2415 | FCT/0584 | FCT/0584/S/4  | Sisters of Nativity Hospital              |               | Jikwoyi Phase 1, Behind Asaka Cement                                 | Municipal  | FCT |
| 2416 | FCT/0584 | FCT/0584/S/3  | Sisters of Nativity Hospital              |               | Jikwoyi Phase 1, Behind Asaka Cement                                 | Municipal  | FCT |
| 2417 | FCT/0584 | FCT/0584/S/5  | Sisters of Nativity Hospital              |               | Jikwoyi Phase 1, Behind Asaka Cement                                 | Municipal  | FCT |
| 2418 | FCT/0587 | FCT/0587/S/13 | De Lens Ophthalmic                        | Optometry     | Suite G14 Ground floor, Febson Mall, Wuse Zone 4, Abuja              | Municipal  | FCT |
| 2419 | FCT/0591 | FCT/0591/S/13 | Maxrings Eye Clinic                       | Optometry     | Suite BS 108 Old Banex Plaza, Wuse II, Abuja                         | Municipal  | FCT |
| 2420 | FCT/0592 | FCT/0592/S/13 | More Eye Clinic                           | Optometry     | Plot 3162B IBB Way, Opposite BPE, Maitama                            | Municipal  | FCT |
| 2421 | FCT/0593 | FCT/0593/S/1  | Lifeway Medical Centre                    |               | 60 Harper Street, Wuse Zone 7                                        | Municipal  | FCT |
| 2422 | FCT/0593 | FCT/0593/S/2  | Lifeway Medical Centre                    |               | 60 Harper Street, Wuse Zone 7                                        | Municipal  | FCT |
| 2423 | FCT/0593 | FCT/0593/S/5  | Lifeway Medical Centre                    |               | 60 Harper Street, Wuse Zone 7                                        | Municipal  | FCT |
| 2424 | FCT/0593 | FCT/0593/S/6  | Lifeway Medical Centre                    |               | 60 Harper Street, Wuse Zone 7                                        | Municipal  | FCT |
| 2425 | FCT/0593 | FCT/0593/S/3  | Lifeway Medical Centre                    |               | 60 Harper Street, Wuse Zone 7                                        | Municipal  | FCT |
| 2426 | FCT/0595 | FCT/0595/S/5  | Kubwa Muslim Community Hospital (KMC)     |               | Phase 4, Opposite Jumat Mosque Kubwa                                 | Bwari      | FCT |
| 2427 | FCT/0595 | FCT/0595/S/4  | Kubwa Muslim Community Hospital (KMC)     |               | Phase 4, Opposite Jumat Mosque Kubwa                                 | Bwari      | FCT |
| 2428 | FCT/0600 | FCT/0600/S/3  | Royal Specialist Hospital                 |               | 2 Kukawa Street, off Gimbiya Street, Area 11, Garki                  | Municipal  | FCT |
| 2429 | FCT/0600 | FCT/0600/S/7  | Royal Specialist Hospital                 |               | 2 Kukawa Street, off Gimbiya Street, Area 11, Garki                  | Municipal  | FCT |
| 2430 | FCT/0600 | FCT/0600/S/6  | Royal Specialist Hospital                 |               | 2 Kukawa Street, off Gimbiya Street, Area 11, Garki                  | Municipal  | FCT |
| 2431 | FCT/0600 | FCT/0600/S/1  | Royal Specialist Hospital                 |               | 2 Kukawa Street, off Gimbiya Street, Area 11, Garki                  | Municipal  | FCT |
| 2432 | FCT/0600 | FCT/0600/S/2  | Royal Specialist Hospital                 |               | 2 Kukawa Street, off Gimbiya Street, Area 11, Garki                  | Municipal  | FCT |
| 2433 | FCT/0600 | FCT/0600/S/5  | Royal Specialist Hospital                 |               | 2 Kukawa Street, off Gimbiya Street, Area 11, Garki                  | Municipal  | FCT |
| 2434 | FCT/0601 | FCT/0601/S/3  | Tollbert Specialists Hospitals Ltd        |               | 3 Substation Close off Constitution Avenue, Gaduwa Estate            | Municipal  | FCT |

|      |          |               |                                     |  |                                                                                                          |            |     |
|------|----------|---------------|-------------------------------------|--|----------------------------------------------------------------------------------------------------------|------------|-----|
| 2435 | FCT/0602 | FCT/0602/S/7  | Prime Scan Medical Services Limited |  | B13, Amac Plaza, Opp. Heritage House, Zone 3, Wuse                                                       | Municipal  | FCT |
| 2436 | FCT/0602 | FCT/0602/S/5  | Prime Scan Medical Services Limited |  | B13, Amac Plaza, Opp. Heritage House, Zone 3, Wuse                                                       | Municipal  | FCT |
| 2437 | FCT/0606 | FCT/0606/S/13 | Rayfields Eye Care Limited          |  | Suite BA5 First Floor, Apo Sparklight Shopping Mall, Mohammed Umar Lane, Opp Living Faith Church, Durumi | Municipal  | FCT |
| 2438 | FCT/0610 | FCT/0610/S/5  | Rubochi General Hospital            |  | Rubochi Town                                                                                             | Municipal  | FCT |
| 2439 | FCT/0610 | FCT/0610/S/1  | Rubochi General Hospital            |  | Rubochi Town                                                                                             | Municipal  | FCT |
| 2440 | FCT/0610 | FCT/0610/S/4  | Rubochi General Hospital            |  | Rubochi Town                                                                                             | Municipal  | FCT |
| 2441 | FCT/0610 | FCT/0610/S/3  | Rubochi General Hospital            |  | Rubochi Town                                                                                             | Municipal  | FCT |
| 2442 | FCT/0611 | FCT/0611/S/5  | Samto Medical Services              |  | 4th/2nd Avenue, Supreme Court Quarters, Karu                                                             | Municipal  | FCT |
| 2443 | FCT/0612 | FCT/0612/S/5  | Family Care Multiclinics            |  | 9, Lord Lugard Street, Asokoro                                                                           | Municipal  | FCT |
| 2444 | FCT/0612 | FCT/0612/S/1  | Family Care Multiclinics            |  | 9, Lord Lugard Street, Asokoro                                                                           | Municipal  | FCT |
| 2445 | FCT/0612 | FCT/0612/S/3  | Family Care Multiclinics            |  | 9, Lord Lugard Street, Asokoro                                                                           | Municipal  | FCT |
| 2446 | FCT/0612 | FCT/0612/S/7  | Family Care Multiclinics            |  | 9, Lord Lugard Street, Asokoro                                                                           | Municipal  | FCT |
| 2447 | FCT/0614 | FCT/0614/S/1  | Wellington Clinics Limited          |  | 10 Vanem Street, off Euphrates Street, Maitama                                                           | Municipal  | FCT |
| 2448 | FCT/0614 | FCT/0614/S/5  | Wellington Clinics Limited          |  | 10 Vanem Street, off Euphrates Street, Maitama                                                           | Municipal  | FCT |
| 2449 | FCT/0614 | FCT/0614/S/7  | Wellington Clinics Limited          |  | 10 Vanem Street, off Euphrates Street, Maitama                                                           | Municipal  | FCT |
| 2450 | FCT/0615 | FCT/0615/S/3  | Vintage Medical Centre              |  | F Road, CITEC Estate, Mbora District                                                                     | Municipal  | FCT |
| 2451 | FCT/0615 | FCT/0615/S/2  | Vintage Medical Centre              |  | F Road, CITEC Estate, Mbora District                                                                     | Municipal  | FCT |
| 2452 | FCT/0615 | FCT/0615/S/6  | Vintage Medical Centre              |  | F Road, CITEC Estate, Mbora District                                                                     | Municipal  | FCT |
| 2453 | FCT/0615 | FCT/0615/S/1  | Vintage Medical Centre              |  | F Road, CITEC Estate, Mbora District                                                                     | Municipal  | FCT |
| 2454 | FCT/0616 | FCT/0616/S/5  | Crystal Diagnostic & Care Limited   |  | 25 Niamey Street, off Ouagadougou, Wuse Zone 2                                                           | Municipal  | FCT |
| 2455 | FCT/0616 | FCT/0616/S/7  | Crystal Diagnostic & Care Limited   |  | 25 Niamey Street, off Ouagadougou, Wuse Zone 2                                                           | Municipal  | FCT |
| 2456 | FCT/0619 | FCT/0619/S/5  | Medimax Hospital                    |  | 11, 612 Road (7th Avenue) Gwarinpa                                                                       | Municipal  | FCT |
| 2457 | FCT/0619 | FCT/0619/S/3  | Medimax Hospital                    |  | 11, 612 Road (7th Avenue) Gwarinpa                                                                       | Municipal  | FCT |
| 2458 | FCT/0620 | FCT/0620/S/10 | Supreme Clinic, Orthopaedic/Trauma  |  | 15 Lingu Crescent, off Aminu Kano Crescent, Wuse 2                                                       | Municipal  | FCT |
| 2459 | FCT/0621 | FCT/0621/S/6  | Seraph Medical Practice             |  | 46, 3rd Avenue, EFAB Estate, Mbora, Life Camp                                                            | Municipal  | FCT |
| 2460 | FCT/0626 | FCT/0626/S/8  | Excel Specialist Dental Clinic      |  | Suite 17, Phase 1 Corner Shop, Gwagwalada                                                                | Gwagwalada | FCT |
| 2461 | FCT/0629 | FCT/0629/S/13 | Aiso Vision Centre                  |  | Suite 310B, DBM Plaza, Aminu Kano Crescent, Wuse 2                                                       | Municipal  | FCT |
| 2462 | FCT/0630 | FCT/0630/S/13 | True Sight Enterprises              |  | Suite 17, First Floor, Tulse Plaza, Lawan Gwadabe Crescent, Zone E Apo Legislative Qtrs                  | Municipal  | FCT |
| 2463 | FCT/0633 | FCT/0633/S/8  | Alpha Hills Dental Clinic           |  | Plot 22 Algiers Street, Zone 5, Wuse                                                                     | Municipal  | FCT |
| 2464 | FCT/0634 | FCT/0634/S/7  | Atlas Diagnostic Center             |  | 48 Akintola Boulevard, Opp Monday Markrt, Garki 2                                                        | Municipal  | FCT |
| 2465 | FCT/0634 | FCT/0634/S/5  | Atlas Diagnostic Center             |  | 48 Akintola Boulevard, Opp Monday Markrt, Garki 2                                                        | Municipal  | FCT |
| 2466 | FCT/0637 | FCT/0637/S/14 | Body Check International            |  | Abraham Plaza, Plot 6 Ehukinam Street, beside ABC Transport Company, Utako                               | Municipal  | FCT |
| 2467 | FCT/0638 | FCT/0638/S/1  | EFAB Medical Centre                 |  | 28, 2nd Avenue (Adjacent to Mosque) RFAB City Estate, Mbora 1, Life Camp                                 | Municipal  | FCT |
| 2468 | FCT/0639 | FCT/0639/S/3  | Zenith Medical and Kidney Centre    |  | 28 Ubiaja Crescent, Garki 2                                                                              | Municipal  | FCT |

|      |          |               |                                                |           |                                                                                                     |           |     |
|------|----------|---------------|------------------------------------------------|-----------|-----------------------------------------------------------------------------------------------------|-----------|-----|
| 2469 | FCT/0639 | FCT/0639/S/5  | Zenith Medical and Kidney Centre               |           | 28 Ubijaja Crescent, Garki 2                                                                        | Municipal | FCT |
| 2470 | FCT/0639 | FCT/0639/S/2  | Zenith Medical and Kidney Centre               |           | 28 Ubijaja Crescent, Garki 2                                                                        | Municipal | FCT |
| 2471 | FCT/0640 | FCT/0640/S/5  | New Edge Medical Lab                           |           | Room 209, Ansar Plaza by Berger Junction Mpape, Abuja                                               | Municipal | FCT |
| 2472 | FCT/0641 | FCT/0641/S/5  | New Edge Health Services Limited               |           | 1st Floor, Suite 18, Wing B, Deo Gratias Plaza, Opp Utako Market                                    | Municipal | FCT |
| 2473 | FCT/0643 | FCT/0643/S/13 | Bridge of Sight Consult Limited                |           | Plor 83, Road 21, Phase 2, FHA Lugbe                                                                | Municipal | FCT |
| 2474 | FCT/0645 | FCT/0645/S/3  | Open Healthcare Ltd                            | PP, O & G | 11, Ademola Awosika Road, Kubwa Ext. 3, off Bwari-Dutse Expressway, Abuja                           | Municipal | FCT |
| 2475 | FCT/0646 | FCT/0646/S/8  | Evening Light Clinics                          |           | Suite CDS 5, 1st Floor, Harmonic Plaza, Mike Akhigbe way (near Apostolic Faith Church) Jabi, Abuja. | Municipal | FCT |
| 2476 | FCT/0647 | FCT/0647/S/13 | Maldor Eyecare Center & Optical Services Ltd   |           | Suite CSF 04, K-City Plaza, Plot 528 Aminu Kano crescent, Wuse 2 Abuja                              | Municipal | FCT |
| 2477 | FCT/0648 | FCT/0648/S/4  | Jethro Pharmacy and Stores                     |           | 90, Ademola Adetokunbo crescent, Wuse 2, Abuja                                                      | Municipal | FCT |
| 2478 | FCT/0649 | FCT/0649/S/9  | Synapse Centre for Psychological Medicine      |           | 24, Bujumburu Street, Off Aminu Kano Crescent, Wuse 2, Abuja                                        | Municipal | FCT |
| 2479 | FCT/0650 | FCT/0650/S/1  | Salama Infirmary Hospital and Maternity        |           | No 24, 64 crescent, After Chaley Boy Boulevard, Gwarinpa                                            | Municipal | FCT |
| 2480 | FCT/0650 | FCT/0650/S/3  | Salama Infirmary Hospital and Maternity        |           | No 24, 64 crescent, After Chaley Boy Boulevard, Gwarinpa                                            | Municipal | FCT |
| 2481 | FCT/0650 | FCT/0650/S/2  | Salama Infirmary Hospital and Maternity        |           | No 24, 64 crescent, After Chaley Boy Boulevard, Gwarinpa                                            | Municipal | FCT |
| 2482 | FCT/0651 | FCT/0651/S/1  | Chivar Clinics and Urology Center              |           | 30, Agadez street, off Aminu Kano crescent, Wuse 2, Abuja                                           | Municipal | FCT |
| 2483 | FCT/0651 | FCT/0651/S/16 | Chivar Clinics and Urology Center              |           | 30, Agadez street, off Aminu Kano crescent, Wuse 2, Abuja                                           | Municipal | FCT |
| 2484 | FCT/0651 | FCT/0651/S/14 | Chivar Clinics and Urology Center              |           | 30, Agadez street, off Aminu Kano crescent, Wuse 2, Abuja                                           | Municipal | FCT |
| 2485 | FCT/0651 | FCT/0651/S/17 | Chivar Clinics and Urology Center              |           | 30, Agadez street, off Aminu Kano crescent, Wuse 2, Abuja                                           | Municipal | FCT |
| 2486 | FCT/0651 | FCT/0651/S/2  | Chivar Clinics and Urology Center              |           | 30, Agadez street, off Aminu Kano crescent, Wuse 2, Abuja                                           | Municipal | FCT |
| 2487 | FCT/0651 | FCT/0651/S/5  | Chivar Clinics and Urology Center              |           | 30, Agadez street, off Aminu Kano crescent, Wuse 2, Abuja                                           | Municipal | FCT |
| 2488 | FCT/0652 | FCT/0652/S/13 | Zikora Hospital                                |           | Plot 16A, End of 69 road (Off 6th Avenue - Galadima Estate) Gwarinpa, Abuja                         | Municipal | FCT |
| 2489 | FCT/0653 | FCT/0653/S/1  | Primus International Super Specialist Hospital |           | Karu New Extension, Behind Customs Quarters, Karu, Abuja                                            | Municipal | FCT |
| 2490 | FCT/0653 | FCT/0653/S/7  | Primus International Super Specialist Hospital |           | Karu New Extension, Behind Customs Quarters, Karu, Abuja                                            | Municipal | FCT |
| 2491 | FCT/0653 | FCT/0653/S/4  | Primus International Super Specialist Hospital |           | Karu New Extension, Behind Customs Quarters, Karu, Abuja                                            | Municipal | FCT |
| 2492 | FCT/0653 | FCT/0653/S/5  | Primus International Super Specialist Hospital |           | Karu New Extension, Behind Customs Quarters, Karu, Abuja                                            | Municipal | FCT |
| 2493 | FCT/0653 | FCT/0653/S/10 | Primus International Super Specialist Hospital |           | Karu New Extension, Behind Customs Quarters, Karu, Abuja                                            | Municipal | FCT |
| 2494 | FCT/0655 | FCT/0655/S/5  | Penthouse Clinics Ltd                          |           | Plot 170, Kado Karimu Rd, after Kado Fish Market, Abuja – FCT.                                      | Municipal | FCT |
| 2495 | FCT/0657 | FCT/0657/S/12 | Fountain sides Hospital                        |           | Plot 73A 1st Avenue opp. Bonny B Corner Shop Gwarimpa Abuja                                         | Municipal | FCT |
| 2496 | FCT/0657 | FCT/0657/S/1  | Fountain sides Hospital                        |           | Plot 73A 1st Avenue opp. Bonny B Corner Shop Gwarimpa Abuja                                         | Municipal | FCT |
| 2497 | FCT/0657 | FCT/0657/S/3  | Fountain sides Hospital                        |           | Plot 73A 1st Avenue opp. Bonny B Corner Shop Gwarimpa Abuja                                         | Municipal | FCT |



|      |          |               |                                                          |  |                                                                                        |            |     |
|------|----------|---------------|----------------------------------------------------------|--|----------------------------------------------------------------------------------------|------------|-----|
| 2498 | FCT/0657 | FCT/0657/S/10 | Fountain sides Hospital                                  |  | Plot 73A 1st Avenue opp. Bonny B Corner Shop Gwarimpa Abuja                            | Municipal  | FCT |
| 2499 | FCT/0658 | FCT/0658/S/10 | Cedacrest Hospital                                       |  | Plot 195 Apo-Dutse way off. Oladipo Diya way, by Amina Court Estate, Gudu Abuja        | Municipal  | FCT |
| 2500 | FCT/0658 | FCT/0658/S/1  | Cedacrest Hospital                                       |  | Plot 195 Apo-Dutse way off. Oladipo Diya way, by Amina Court Estate, Gudu Abuja        | Municipal  | FCT |
| 2501 | FCT/0659 | FCT/0659/S/5  | Cornelian Maternity & Rural Healthcare Centre            |  | Holy Child Lane, Opposite Loyola Jesuit Maingate, Gidan Mangoro, Abuja-FCT.            | Municipal  | FCT |
| 2502 | FCT/0659 | FCT/0659/S/2  | Cornelian Maternity & Rural Healthcare Centre            |  | Holy Child Lane, Opposite Loyola Jesuit Maingate, Gidan Mangoro, Abuja-FCT.            | Municipal  | FCT |
| 2503 | FCT/0659 | FCT/0659/S/3  | Cornelian Maternity & Rural Healthcare Centre            |  | Holy Child Lane, Opposite Loyola Jesuit Maingate, Gidan Mangoro, Abuja-FCT.            | Municipal  | FCT |
| 2504 | FCT/0659 | FCT/0659/S/1  | Cornelian Maternity & Rural Healthcare Centre            |  | Holy Child Lane, Opposite Loyola Jesuit Maingate, Gidan Mangoro, Abuja-FCT.            | Municipal  | FCT |
| 2505 | FCT/0660 | FCT/0660/S/13 | Icon Eye Clinic                                          |  | Suite B16, Shakir Plaza, by Assemblies of God, Area 11, Garki, Abuja, FCT              | Municipal  | FCT |
| 2506 | FCT/0663 | FCT/0663/S/1  | Zaman Clinic & Maternity                                 |  | 25 Road 21B, Babangida Rd. FHA, Lugbe, Abuja                                           | Municipal  | FCT |
| 2507 | FCT/0663 | FCT/0663/S/3  | Zaman Clinic & Maternity                                 |  | 25 Road 21B, Babangida Rd. FHA, Lugbe, Abuja                                           | Municipal  | FCT |
| 2508 | FCT/0665 | FCT/0665/S/1  | Vic-James Hospital                                       |  | Plot 211, Cadastral Zone 07-05, Gbazango Extension, Kubwa, Abuja                       | Bwari      | FCT |
| 2509 | FCT/0666 | FCT/0666/S/8  | QH Specialist Dental Clinic and Resource Centre          |  | Suite C3, Sysak Plaza, Opp Redeemed Church, Road 5213, Off 1st Avenue, Gwarimpa, Abuja | Municipal  | FCT |
| 2510 | FCT/0667 | FCT/0667/S/5  | Nigerian Security and Civil Defence Corps Medical Center |  | Sauka Academy (Beside Immigration Passport Office), off Airport Road, Abuja.           | Municipal  | FCT |
| 2511 | FCT/0667 | FCT/0667/S/4  | Nigerian Security and Civil Defence Corps Medical Center |  | Sauka Academy (Beside Immigration Passport Office), off Airport Road, Abuja.           | Municipal  | FCT |
| 2512 | FCT/0671 | FCT/0671/S/11 | Optimal Health Centre International Limited              |  | 4 Bawku Street, Off Morovia Street, Wuse 2, Abuja                                      | Municipal  | FCT |
| 2513 | FCT/0674 | FCT/0674/S/3  | Louis-Pastuer Hospital LTD                               |  | 813C, 64 Crescent, Gwarinpa 2 Estate, Map Global Junction, Abuja                       | Municipal  | FCT |
| 2514 | FCT/0674 | FCT/0674/S/4  | Louis-Pastuer Hospital LTD                               |  | 813C, 64 Crescent, Gwarinpa 2 Estate, Map Global Junction, Abuja                       | Municipal  | FCT |
| 2515 | FCT/0674 | FCT/0674/S/6  | Louis-Pastuer Hospital LTD                               |  | 813C, 64 Crescent, Gwarinpa 2 Estate, Map Global Junction, Abuja                       | Municipal  | FCT |
| 2516 | FCT/0674 | FCT/0674/S/1  | Louis-Pastuer Hospital LTD                               |  | 813C, 64 Crescent, Gwarinpa 2 Estate, Map Global Junction, Abuja                       | Municipal  | FCT |
| 2517 | FCT/0676 | FCT/0676/S/14 | LeahJada-Joseph Medical Centre                           |  | Plot 7, Chris Chukwukelu Street, Behind Central Mosque, Gwagwalada, F.C.T              | Gwagwalada | FCT |
| 2518 | FCT/0676 | FCT/0676/S/5  | LeahJada-Joseph Medical Centre                           |  | Plot 7, Chris Chukwukelu Street, Behind Central Mosque, Gwagwalada, F.C.T              | Gwagwalada | FCT |
| 2519 | FCT/0677 | FCT/0677/S/4  | Ages Pharmacy &Stores                                    |  | Plot 15, Phase 2, Kurudu Army Estate, Kurudu, F.C.T                                    | Municipal  | FCT |
| 2520 | FCT/0679 | FCT/0679/S/2  | Jehova Adonai Eagle Hospital                             |  | 314, Street B, Phase 1, Gwagwalada, F.C.T                                              | Gwagwalada | FCT |
| 2521 | FCT/0679 | FCT/0679/S/3  | Jehova Adonai Eagle Hospital                             |  | 314, Street B, Phase 1, Gwagwalada, F.C.T                                              | Gwagwalada | FCT |
| 2522 | FCT/0680 | FCT/0680/S/6  | Joyland Medical Centre & Children Hospital               |  | Main Close, Valencia Garden Estate, Dakwo District, F.C.T                              | Municipal  | FCT |
| 2523 | FCT/0682 | FCT/0682/S/13 | Atlanta Eye Clinic                                       |  | Suite 1, Cherry Hill Plaza, Eke A. Yusuf Close, Utako, Abuja                           | Municipal  | FCT |
| 2524 | FCT/0684 | FCT/0684/S/13 | Opticare Limited                                         |  | Suite 1A, Macluma Plaza, 2 Mambolo Close, Wuse 2, F.C.T                                | Municipal  | FCT |

|      |          |               |                                                       |  |                                                                                                             |           |     |
|------|----------|---------------|-------------------------------------------------------|--|-------------------------------------------------------------------------------------------------------------|-----------|-----|
| 2525 | FCT/0686 | FCT/0686/S/13 | Davik Eye Clinic                                      |  | Plot 114/115 Phase IV,<br>Mami Road Nyanya, F.C.T                                                           | Municipal | FCT |
| 2526 | FCT/0687 | FCT/0687/S/8  | Dazzle Dental Clinics<br>LTD                          |  | Suite FC 14 Banex Plaza, Plot<br>750, Aminu Kano Crescent,<br>Zone A7, Wuse 2, Abuja                        | Municipal | FCT |
| 2527 | FCT/0689 | FCT/0689/S/13 | Princess Vision Eye<br>Clinic Limited                 |  | Suite 12A Anon Plaza,<br>Besides NNPC Filling Station,<br>Gudu, F.C.T                                       | Municipal | FCT |
| 2528 | FCT/0690 | FCT/0690/S/4  | Nigeria Atomic Energy<br>Commission Staff Clinic      |  | SHETCO Complex, Sheda,<br>F.C.T                                                                             | Kwali     | FCT |
| 2529 | FCT/0691 | FCT/0691/S/13 | NuVision Eye Clinic                                   |  | Suite A36/A52 Area 11<br>Shopping Mall (Efab Mall),<br>Gasrki, F.C.T                                        | Municipal | FCT |
| 2530 | FCT/0692 | FCT/0692/S/5  | Decency Amana<br>Medical Lab.                         |  | White House, Opposite<br>Assemblies of God Church,<br>Karshi, F.C.T                                         | Municipal | FCT |
| 2531 | FCT/0693 | FCT/0693/S/3  | The Comforters Place                                  |  | Plot 12 Democracy<br>Crescent, Gaduwa Estate,<br>F.C.T                                                      | Municipal | FCT |
| 2532 | FCT/0695 | FCT/0695/S/2  | Guinea Savannah<br>Medical Center                     |  | Communal Center, NNPC<br>Housing Estate Area 2,Garki                                                        | Municipal | FCT |
| 2533 | FCT/0695 | FCT/0695/S/1  | Guinea Savannah<br>Medical Center                     |  | Communal Center, NNPC<br>Housing Estate Area 2,Garki                                                        | Municipal | FCT |
| 2534 | FCT/0695 | FCT/0695/S/3  | Guinea Savannah<br>Medical Center                     |  | Communal Center, NNPC<br>Housing Estate Area 2,Garki                                                        | Municipal | FCT |
| 2535 | FCT/0695 | FCT/0695/S/6  | Guinea Savannah<br>Medical Center                     |  | Communal Center, NNPC<br>Housing Estate Area 2,Garki                                                        | Municipal | FCT |
| 2536 | FCT/0696 | FCT/0696/S/13 | Atlanta Eye Clinic                                    |  | Suite 1, Cherry Hill Plaza,<br>Eke A. Yusuf Close, Utako,<br>Abuja F.C.T                                    | Municipal | FCT |
| 2537 | FCT/0700 | FCT/0700/S/15 | Florida Eye Clinic                                    |  | Amma House Plot 432,<br>Yakubu Bam Street (Opp.<br>National Hospital) Abuja-FCT                             | Municipal | FCT |
| 2538 | FCT/0701 | FCT/0701/S/8  | Glow Dental Clinic                                    |  | Suite 4 Highbury Plaza,<br>GadaNasco Road, Kubuwa,<br>Abuja                                                 | Bwari     | FCT |
| 2539 | FCT/0702 | FCT/0702/S/13 | Happy Eye Vision<br>Clinic.                           |  | 40 Suarez Crescent, Ibrahim<br>Abacha Estate Wuse Zone 4<br>Abuja FCT.                                      | Municipal | FCT |
| 2540 | FCT/0703 | FCT/0703/S/11 | Fitness Global Consult<br>And Physiotherapy<br>Clinic |  | No. 20 Limpopo Street Off<br>Yedseram Street, FHA-<br>Maitama                                               | Municipal | FCT |
| 2541 | FCT/0707 | FCT/0707/S/2  | Martin Luther- Obama<br>Specialist Hospital.          |  | 51, Yellow House, Loyola<br>Street, Opp. Loyola Jesuit<br>College Staff Gate, Gidan<br>Mangoro, Abuja F.C.T | Municipal | FCT |
| 2542 | FCT/0707 | FCT/0707/S/1  | Martin Luther- Obama<br>Specialist Hospital.          |  | 51, Yellow House, Loyola<br>Street, Opp. Loyola Jesuit<br>College Staff Gate, Gidan<br>Mangoro, Abuja F.C.T | Municipal | FCT |
| 2543 | FCT/0708 | FCT/0708/S/8  | Mouth-Mirror Dental<br>Services Limi Hospital         |  | Behind Independent Corrupt<br>Practices Commission<br>Central Business Area Abuja<br>F.C.T                  | Municipal | FCT |
| 2544 | FCT/0710 | FCT/0710/S/7  | Lifefridge Medical<br>Diagnostics Center              |  | 15A Yawuri Street, Garki 11<br>Abuja F.C.T                                                                  | Municipal | FCT |
| 2545 | FCT/0710 | FCT/0710/S/5  | Lifefridge Medical<br>Diagnostics Center              |  | 15A Yawuri Street, Garki 11<br>Abuja F.C.T                                                                  | Municipal | FCT |
| 2546 | FCT/0710 | FCT/0710/S/14 | Lifefridge Medical<br>Diagnostics Center              |  | 15A Yawuri Street, Garki 11<br>Abuja F.C.T                                                                  | Municipal | FCT |
| 2547 | FCT/0711 | FCT/0711/S/1  | Modelcare Hospital                                    |  | 5, Jaba Close Off Dunukofia<br>Str. By FCDA Minister`s<br>Gate, Garki Area 11, Abuja<br>F.C.T               | Municipal | FCT |
| 2548 | FCT/0711 | FCT/0711/S/6  | Modelcare Hospital                                    |  | 5, Jaba Close Off Dunukofia<br>Str. By FCDA Minister`s<br>Gate, Garki Area 11, Abuja<br>F.C.T               | Municipal | FCT |
| 2549 | FCT/0711 | FCT/0711/S/15 | Modelcare Hospital                                    |  | 5, Jaba Close Off Dunukofia<br>Str. By FCDA Minister`s<br>Gate, Garki Area 11, Abuja<br>F.C.T               | Municipal | FCT |
| 2550 | FCT/0711 | FCT/0711/S/2  | Modelcare Hospital                                    |  | 5, Jaba Close Off Dunukofia<br>Str. By FCDA Minister`s<br>Gate, Garki Area 11, Abuja<br>F.C.T               | Municipal | FCT |
| 2551 | FCT/0711 | FCT/0711/S/5  | Modelcare Hospital                                    |  | 5, Jaba Close Off Dunukofia<br>Str. By FCDA Minister`s<br>Gate, Garki Area 11, Abuja<br>F.C.T               | Municipal | FCT |

|      |          |               |                                                          |  |                                                                                                                          |            |     |
|------|----------|---------------|----------------------------------------------------------|--|--------------------------------------------------------------------------------------------------------------------------|------------|-----|
| 2552 | FCT/0711 | FCT/0711/S/3  | Modelcare Hospital                                       |  | 5, Jaba Close Off Dunukofia Str. By FCDA Minister's Gate, Garki Area 11, Abuja F.C.T                                     | Municipal  | FCT |
| 2553 | FCT/0711 | FCT/0711/S/12 | Modelcare Hospital                                       |  | 5, Jaba Close Off Dunukofia Str. By FCDA Minister's Gate, Garki Area 11, Abuja F.C.T                                     | Municipal  | FCT |
| 2554 | FCT/0713 | FCT/0713/S/13 | Irolyn Optical Care Clinic                               |  | Suite 11, Opposite Kuje Area Council, Kuje Secretariat Road, Kuje F.C.T                                                  | Kuje       | FCT |
| 2555 | FCT/0715 | FCT/0715/S/19 | Althea Specialty Clinics Ltd                             |  | 4 Bima Close Off Otukpo Str. Off Gimbiya Str. Garki Area 11 Abuja F.C.T                                                  | Municipal  | FCT |
| 2556 | FCT/0716 | FCT/0716/S/7  | Freedomsan Medical Centre                                |  | Area B, Last Road, Nyanya, Abuja F.C.T                                                                                   | Municipal  | FCT |
| 2557 | FCT/0717 | FCT/0717/S/8  | Global Smile Dental Care Center                          |  | 50, Ebitu Ukiwe Street, Jabi District, Abuja F.C.T                                                                       | Municipal  | FCT |
| 2558 | FCT/0719 | FCT/0719/S/8  | Kings And Queens Dental & Maxillofacial Clinic           |  | Suite 1 Emmamac Plaza Near Radio House, Gwagwalada F.C.T                                                                 | Gwagwalada | FCT |
| 2559 | FCT/0720 | FCT/0720/S/13 | Sight Haven Eye Clinic                                   |  | 17 Gwandu Str. Off Uke Crescent (Fereprod Med. Centre) Garki Area 11                                                     | Municipal  | FCT |
| 2560 | FCT/0721 | FCT/0721/S/5  | Sisto Medical Services                                   |  | Caxton Idowu Abayomi Shopping Plaza, Shop GA 22, Post Service Housing Estate, Phase 2, Kurudu Army Barracks, Abuja F.C.T | Municipal  | FCT |
| 2561 | FCT/0722 | FCT/0722/S/3  | Fountain Trust Medical & Diagnostic Centre Ltd           |  | No. 6 Pastor Enoch Adeboye Street Off 24 Crescent, 2nd Avenue Gwarimpa Estate, Abuja F.C.T                               | Municipal  | FCT |
| 2562 | FCT/0723 | FCT/0723/S/11 | Rosemech Physiotherapy Ltd                               |  | (Garki Gen. Hospital) Tafawa Balawa Way Garki Area 8 Abuja F.C.T                                                         | Municipal  | FCT |
| 2563 | FCT/0725 | FCT/0725/S/7  | Community Hospital & Diagnostic Centre                   |  | Plot 342 Kubwa Extension 111 Dutse Alhaji Abuja F.C.T                                                                    | Bwari      | FCT |
| 2564 | FCT/0725 | FCT/0725/S/2  | Community Hospital & Diagnostic Centre                   |  | Plot 342 Kubwa Extension 111 Dutse Alhaji Abuja F.C.T                                                                    | Bwari      | FCT |
| 2565 | FCT/0725 | FCT/0725/S/6  | Community Hospital & Diagnostic Centre                   |  | Plot 342 Kubwa Extension 111 Dutse Alhaji Abuja F.C.T                                                                    | Bwari      | FCT |
| 2566 | FCT/0725 | FCT/0725/S/5  | Community Hospital & Diagnostic Centre                   |  | Plot 342 Kubwa Extension 111 Dutse Alhaji Abuja F.C.T                                                                    | Bwari      | FCT |
| 2567 | FCT/0725 | FCT/0725/S/1  | Community Hospital & Diagnostic Centre                   |  | Plot 342 Kubwa Extension 111 Dutse Alhaji Abuja F.C.T                                                                    | Bwari      | FCT |
| 2568 | FCT/0725 | FCT/0725/S/3  | Community Hospital & Diagnostic Centre                   |  | Plot 342 Kubwa Extension 111 Dutse Alhaji Abuja F.C.T                                                                    | Bwari      | FCT |
| 2569 | FCT/0727 | FCT/0727/S/13 | The Eye Place                                            |  | 23, Ekuinam Street, Utako District Abuja F.C.T                                                                           | Municipal  | FCT |
| 2570 | FCT/0729 | FCT/0729/S/1  | Katameya First call Hospital Limited                     |  | Plot 167 Cadastral Zone B09 Beside Next Shopping Mall, Kado Kuchi, Abuja. F.C.T                                          | Municipal  | FCT |
| 2571 | FCT/0729 | FCT/0729/S/5  | Katameya First call Hospital Limited                     |  | Plot 167 Cadastral Zone B09 Beside Next Shopping Mall, Kado Kuchi, Abuja. F.C.T                                          | Municipal  | FCT |
| 2572 | FCT/0729 | FCT/0729/S/3  | Katameya First call Hospital Limited                     |  | Plot 167 Cadastral Zone B09 Beside Next Shopping Mall, Kado Kuchi, Abuja. F.C.T                                          | Municipal  | FCT |
| 2573 | FCT/0730 | FCT/0730/S/5  | Menovas Consultants Clinic                               |  | Plot 53 Road B, Bentell Villa Estate Gaduwa District, Abuja F.C.T                                                        | Municipal  | FCT |
| 2574 | FCT/0732 | FCT/0732/S/5  | Jodi Medical Center                                      |  | 2 Almurie Omanze Street, Off Ladoke Akintola Boulevard, Garki 2, Abuja F.C.T                                             | Municipal  | FCT |
| 2575 | FCT/0732 | FCT/0732/S/1  | Jodi Medical Center                                      |  | 2 Almurie Omanze Street, Off Ladoke Akintola Boulevard, Garki 2, Abuja F.C.T                                             | Municipal  | FCT |
| 2576 | FCT/0732 | FCT/0732/S/3  | Jodi Medical Center                                      |  | 2 Almurie Omanze Street, Off Ladoke Akintola Boulevard, Garki 2, Abuja F.C.T                                             | Municipal  | FCT |
| 2577 | FCT/0733 | FCT/0733/S/5  | Queen Of All Saints Diagnostic & Medical Laboratory Ltd. |  | No. 17 Monbasa Street Wuse Zone 5 Abuja F.C.T                                                                            | Municipal  | FCT |

|      |          |               |                                         |         |                                                                                                                    |            |       |
|------|----------|---------------|-----------------------------------------|---------|--------------------------------------------------------------------------------------------------------------------|------------|-------|
| 2578 | FCT/0735 | FCT/0735/S/13 | Through Eye Care Clinic                 |         | Plot 359 Obafemi Awolowo Way Or No.24 Ebitu Ukaiwe Street Jabi District Abuja F.C.T                                | Municipal  | FCT   |
| 2579 | FCT/0738 | FCT/0738/S/7  | Allied Surgery Limited                  |         | Phase 1 expansion along Teaching Hospital Road Behind Eco Bank, Gwagwalada                                         | Gwagwalada | FCT   |
| 2580 | FCT/0738 | FCT/0738/S/2  | Allied Surgery Limited                  |         | Phase 1 expansion along Teaching Hospital Road Behind Eco Bank, Gwagwalada                                         | Gwagwalada | FCT   |
| 2581 | FCT/0738 | FCT/0738/S/3  | Allied Surgery Limited                  |         | Phase 1 expansion along Teaching Hospital Road Behind Eco Bank, Gwagwalada                                         | Gwagwalada | FCT   |
| 2582 | FCT/0739 | FCT/0739/S/2  | Premier Heart Hospital and Clinics      |         | 45 Fourth Avenue F.H.A Gwarimpa Abuja                                                                              | Municipal  | FCT   |
| 2583 | FCT/0739 | FCT/0739/S/5  | Premier Heart Hospital and Clinics      |         | 45 Fourth Avenue F.H.A Gwarimpa Abuja                                                                              | Municipal  | FCT   |
| 2584 | FCT/0740 | FCT/0740/S/11 | Bamfak Rehab And Physiotherapy Limited  |         | 19 Dahiru Bauchi Crescent (12th Crescent), Off 1st Avenue, Federal Government Housing Estate, Gwarimpa, Abuja, FCT | Municipal  | FCT   |
| 2585 | FCT/0741 | FCT/0741/S/1  | Royal Orthopaedic Hospital and Medicare |         | 28,Ubiaja Crescent, Garki 11,Abuja FCT                                                                             | Municipal  | FCT   |
| 2586 | FCT/0741 | FCT/0741/S/10 | Royal Orthopaedic Hospital and Medicare |         | 28,Ubiaja Crescent, Garki 11,Abuja FCT                                                                             | Municipal  | FCT   |
| 2587 | FCT/0741 | FCT/0741/S/7  | Royal Orthopaedic Hospital and Medicare |         | 28,Ubiaja Crescent, Garki 11,Abuja FCT                                                                             | Municipal  | FCT   |
| 2588 | GM/0001  | GM/0001/S/4   | General Hospital Billiri                |         | Along Yola Road,Gombe                                                                                              | Billiri    | Gombe |
| 2589 | GM/0001  | GM/0001/S/6   | General Hospital Billiri                |         | Along Yola Road,Gombe                                                                                              | Billiri    | Gombe |
| 2590 | GM/0001  | GM/0001/S/5   | General Hospital Billiri                |         | Along Yola Road,Gombe                                                                                              | Billiri    | Gombe |
| 2591 | GM/0001  | GM/0001/S/1   | General Hospital Billiri                |         | Along Yola Road,Gombe                                                                                              | Billiri    | Gombe |
| 2592 | GM/0001  | GM/0001/S/3   | General Hospital Billiri                |         | Along Yola Road,Gombe                                                                                              | Billiri    | Gombe |
| 2593 | GM/0001  | GM/0001/S/2   | General Hospital Billiri                |         | Along Yola Road,Gombe                                                                                              | Billiri    | Gombe |
| 2594 | GM/0002  | GM/0002/S/6   | Federal Teaching Hospital, Gombe        | Primary | Gombe                                                                                                              | Gombe      | Gombe |
| 2595 | GM/0002  | GM/0002/S/1   | Federal Teaching Hospital, Gombe        | Primary | Gombe                                                                                                              | Gombe      | Gombe |
| 2596 | GM/0002  | GM/0002/S/2   | Federal Teaching Hospital, Gombe        | Primary | Gombe                                                                                                              | Gombe      | Gombe |
| 2597 | GM/0002  | GM/0002/S/5   | Federal Teaching Hospital, Gombe        | Primary | Gombe                                                                                                              | Gombe      | Gombe |
| 2598 | GM/0002  | GM/0002/S/4   | Federal Teaching Hospital, Gombe        | Primary | Gombe                                                                                                              | Gombe      | Gombe |
| 2599 | GM/0002  | GM/0002/S/8   | Federal Teaching Hospital, Gombe        | Primary | Gombe                                                                                                              | Gombe      | Gombe |
| 2600 | GM/0002  | GM/0002/S/12  | Federal Teaching Hospital, Gombe        | Primary | Gombe                                                                                                              | Gombe      | Gombe |
| 2601 | GM/0002  | GM/0002/S/13  | Federal Teaching Hospital, Gombe        | Primary | Gombe                                                                                                              | Gombe      | Gombe |
| 2602 | GM/0002  | GM/0002/S/11  | Federal Teaching Hospital, Gombe        | Primary | Gombe                                                                                                              | Gombe      | Gombe |
| 2603 | GM/0002  | GM/0002/S/3   | Federal Teaching Hospital, Gombe        | Primary | Gombe                                                                                                              | Gombe      | Gombe |
| 2604 | GM/0002  | GM/0002/S/7   | Federal Teaching Hospital, Gombe        | Primary | Gombe                                                                                                              | Gombe      | Gombe |
| 2605 | GM/0003  | GM/0003/S/5   | Doma Hospital                           |         | 5. Commercial Area,Gombe                                                                                           | Gombe      | Gombe |
| 2606 | GM/0003  | GM/0003/S/14  | Doma Hospital                           |         | 5. Commercial Area,Gombe                                                                                           | Gombe      | Gombe |
| 2607 | GM/0003  | GM/0003/S/7   | Doma Hospital                           |         | 5. Commercial Area,Gombe                                                                                           | Gombe      | Gombe |
| 2608 | GM/0004  | GM/0004/S/5   | Miyelti Hospital                        |         | A.Y. Guest House, Dukku Road                                                                                       | Gombe      | Gombe |
| 2609 | GM/0004  | GM/0004/S/7   | Miyelti Hospital                        |         | A.Y. Guest House, Dukku Road                                                                                       | Gombe      | Gombe |
| 2610 | GM/0005  | GM/0005/S/1   | Yarma Memorial Hospital                 |         | Buba Shongo Quarters,Gombe                                                                                         | Gombe      | Gombe |
| 2611 | GM/0005  | GM/0005/S/2   | Yarma Memorial Hospital                 |         | Buba Shongo Quarters,Gombe                                                                                         | Gombe      | Gombe |
| 2612 | GM/0009  | GM/0009/S/5   | Musaba Medical Centre                   |         | Dukku Road                                                                                                         | Gombe      | Gombe |
| 2613 | GM/0010  | GM/0010/S/1   | Hamdala Specialist Clinic               |         | Near Pantami Stadium,Gombe                                                                                         | Gombe      | Gombe |
| 2614 | GM/0013  | GM/0013/S/1   | Sabana Specialist Hospital Ltd.         |         | Federal Lowcost, Gombe                                                                                             | Gombe      | Gombe |

|      |         |              |                                             |                                                                                       |                                            |                   |       |
|------|---------|--------------|---------------------------------------------|---------------------------------------------------------------------------------------|--------------------------------------------|-------------------|-------|
| 2615 | GM/0013 | GM/0013/S/4  | Sabana Specialist Hospital Ltd.             |                                                                                       | Federal Lowcost, Gombe                     | Gombe             | Gombe |
| 2616 | GM/0013 | GM/0013/S/5  | Sabana Specialist Hospital Ltd.             |                                                                                       | Federal Lowcost, Gombe                     | Gombe             | Gombe |
| 2617 | GM/0014 | GM/0014/S/1  | Specialist Hospital, Jekadafari             | Primary                                                                               | Jekadafari                                 | Gombe             | Gombe |
| 2618 | GM/0014 | GM/0014/S/6  | Specialist Hospital, Jekadafari             | Primary                                                                               | Jekadafari                                 | Gombe             | Gombe |
| 2619 | GM/0014 | GM/0014/S/3  | Specialist Hospital, Jekadafari             | Primary                                                                               | Jekadafari                                 | Gombe             | Gombe |
| 2620 | GM/0014 | GM/0014/S/8  | Specialist Hospital, Jekadafari             | Primary                                                                               | Jekadafari                                 | Gombe             | Gombe |
| 2621 | GM/0014 | GM/0014/S/9  | Specialist Hospital, Jekadafari             | Primary                                                                               | Jekadafari                                 | Gombe             | Gombe |
| 2622 | GM/0025 | GM/0025/S/5  | General Hospital, Kaltungo                  |                                                                                       | Kaltungo, Along Yola Road, Gombe           | Kaltungo          | Gombe |
| 2623 | GM/0025 | GM/0025/S/6  | General Hospital, Kaltungo                  |                                                                                       | Kaltungo, Along Yola Road, Gombe           | Kaltungo          | Gombe |
| 2624 | GM/0025 | GM/0025/S/14 | General Hospital, Kaltungo                  |                                                                                       | Kaltungo, Along Yola Road, Gombe           | Kaltungo          | Gombe |
| 2625 | GM/0025 | GM/0025/S/4  | General Hospital, Kaltungo                  |                                                                                       | Kaltungo, Along Yola Road, Gombe           | Kaltungo          | Gombe |
| 2626 | GM/0025 | GM/0025/S/7  | General Hospital, Kaltungo                  |                                                                                       | Kaltungo, Along Yola Road, Gombe           | Kaltungo          | Gombe |
| 2627 | GM/0025 | GM/0025/S/2  | General Hospital, Kaltungo                  |                                                                                       | Kaltungo, Along Yola Road, Gombe           | Kaltungo          | Gombe |
| 2628 | GM/0025 | GM/0025/S/1  | General Hospital, Kaltungo                  |                                                                                       | Kaltungo, Along Yola Road, Gombe           | Kaltungo          | Gombe |
| 2629 | GM/0025 | GM/0025/S/3  | General Hospital, Kaltungo                  |                                                                                       | Kaltungo, Along Yola Road, Gombe           | Kaltungo          | Gombe |
| 2630 | GM/0026 | GM/0026/S/4  | Kumo General Hospital                       |                                                                                       | Kumo L.G.A                                 | Akko              | Gombe |
| 2631 | GM/0026 | GM/0026/S/3  | Kumo General Hospital                       |                                                                                       | Kumo L.G.A                                 | Akko              | Gombe |
| 2632 | GM/0026 | GM/0026/S/1  | Kumo General Hospital                       |                                                                                       | Kumo L.G.A                                 | Akko              | Gombe |
| 2633 | GM/0028 | GM/0028/S/5  | Bimma Med. Centre                           |                                                                                       | Fed. Lowcost, Gombe                        | Gombe             | Gombe |
| 2634 | GM/0036 | GM/0036/S/5  | General Hospital Dukku                      |                                                                                       | Dukku Town                                 | Dukku             | Gombe |
| 2635 | GM/0037 | GM/0037/S/5  | General Hospital Zambuk                     |                                                                                       | Zambuk Town                                | Yalmaltu/ Deba    | Gombe |
| 2636 | GM/0051 | GM/0051/S    | General Hospital, Kumo                      | O&G, Surgery, Paediatrics                                                             | Kumo, Gombe State                          | Akko              | Gombe |
| 2637 | GM/0051 | GM/0051/S/6  | General Hospital, Kumo                      | O&G, Surgery, Paediatrics                                                             | Kumo, Gombe State                          | Akko              | Gombe |
| 2638 | GM/0051 | GM/0051/S/1  | General Hospital, Kumo                      | O&G, Surgery, Paediatrics                                                             | Kumo, Gombe State                          | Akko              | Gombe |
| 2639 | GM/0137 | GM/0137/S/5  | Madi Memorial Clinic and Maternity          |                                                                                       | Tunfure Investment Estate, Gombe           | Akko              | Gombe |
| 2640 | GM/0137 | GM/0137/S/1  | Madi Memorial Clinic and Maternity          |                                                                                       | Tunfure Investment Estate, Gombe           | Akko              | Gombe |
| 2641 | GM/0137 | GM/0137/S/14 | Madi Memorial Clinic and Maternity          |                                                                                       | Tunfure Investment Estate, Gombe           | Akko              | Gombe |
| 2642 | GM/0139 | GM/0139/S/5  | Madina Specialist Eye & medical Center Ltd. |                                                                                       | Madina Specialist & Medical Centre Limited | Gombe             | Gombe |
| 2643 | GM/0143 | GM/0143/S/5  | General Hospital Kashere                    |                                                                                       | Kashere, Gombe State                       | Akko              | Gombe |
| 2644 | GM/0143 | GM/0143/S/4  | General Hospital Kashere                    |                                                                                       | Kashere, Gombe State                       | Akko              | Gombe |
| 2645 | IM/0002 | IM/0002/S/5  | Corpus Christi(Monice Memorial) Hospital    |                                                                                       | Amuzi Mbaise                               | Ahiazu Mbaise     | Imo   |
| 2646 | IM/0004 | IM/0004/S/1  | Jasman Hospital Ltd.                        |                                                                                       | Udo Ezinihitte Mbaise, Imo                 | Ezinihitte Mbaise | Imo   |
| 2647 | IM/0009 | IM/0009/S/8  | General Hospital, Okigwe                    |                                                                                       | Okigwe, Imo State                          | Okigwe (Okigwe)   | Imo   |
| 2648 | IM/0009 | IM/0009/S/2  | General Hospital, Okigwe                    |                                                                                       | Okigwe, Imo State                          | Okigwe (Okigwe)   | Imo   |
| 2649 | IM/0009 | IM/0009/S/4  | General Hospital, Okigwe                    |                                                                                       | Okigwe, Imo State                          | Okigwe (Okigwe)   | Imo   |
| 2650 | IM/0009 | IM/0009/S/3  | General Hospital, Okigwe                    |                                                                                       | Okigwe, Imo State                          | Okigwe (Okigwe)   | Imo   |
| 2651 | IM/0009 | IM/0009/S/5  | General Hospital, Okigwe                    |                                                                                       | Okigwe, Imo State                          | Okigwe (Okigwe)   | Imo   |
| 2652 | IM/0010 | IM/0010/S/4  | Dijon Pharmacy Ltd.                         | Pharmacy                                                                              | No. Ubahu Road, Okigwe, Owerri             | Okigwe (Okigwe)   | Imo   |
| 2653 | IM/0011 | IM/0011/S/4  | Chisom Pharmacy                             | Pharmacy                                                                              | 3, Umuchima Road, Okigwe, Owerri           | Okigwe (Okigwe)   | Imo   |
| 2654 | IM/0012 | IM/0012/S/6  | State Teaching Hospital                     | General Surgery, O & G, Paediatrics, ENT, Ophthalmology, Dental, Laboratory, Pharmacy | Orlu, Imo State                            | Okigwe (Okigwe)   | Imo   |

|      |         |              |                                      |                                                                                                         |                                                      |                          |     |
|------|---------|--------------|--------------------------------------|---------------------------------------------------------------------------------------------------------|------------------------------------------------------|--------------------------|-----|
| 2655 | IM/0012 | IM/0012/S/15 | State Teaching Hospital              | General Surgery,<br>O & G,<br>Paediatrics, ENT,<br>Ophthalmology,<br>Dental,<br>Laboratory,<br>Pharmacy | Orlu, Imo State                                      | Okigwe (Okigwe)          | Imo |
| 2656 | IM/0012 | IM/0012/S/5  | State Teaching Hospital              | General Surgery,<br>O & G,<br>Paediatrics, ENT,<br>Ophthalmology,<br>Dental,<br>Laboratory,<br>Pharmacy | Orlu, Imo State                                      | Okigwe (Okigwe)          | Imo |
| 2657 | IM/0012 | IM/0012/S/1  | State Teaching Hospital              | General Surgery,<br>O & G,<br>Paediatrics, ENT,<br>Ophthalmology,<br>Dental,<br>Laboratory,<br>Pharmacy | Orlu, Imo State                                      | Okigwe (Okigwe)          | Imo |
| 2658 | IM/0012 | IM/0012/S/3  | State Teaching Hospital              | General Surgery,<br>O & G,<br>Paediatrics, ENT,<br>Ophthalmology,<br>Dental,<br>Laboratory,<br>Pharmacy | Orlu, Imo State                                      | Okigwe (Okigwe)          | Imo |
| 2659 | IM/0012 | IM/0012/S/12 | State Teaching Hospital              | General Surgery,<br>O & G,<br>Paediatrics, ENT,<br>Ophthalmology,<br>Dental,<br>Laboratory,<br>Pharmacy | Orlu, Imo State                                      | Okigwe (Okigwe)          | Imo |
| 2660 | IM/0012 | IM/0012/S/8  | State Teaching Hospital              | General Surgery,<br>O & G,<br>Paediatrics, ENT,<br>Ophthalmology,<br>Dental,<br>Laboratory,<br>Pharmacy | Orlu, Imo State                                      | Okigwe (Okigwe)          | Imo |
| 2661 | IM/0012 | IM/0012/S/4  | State Teaching Hospital              | General Surgery,<br>O & G,<br>Paediatrics, ENT,<br>Ophthalmology,<br>Dental,<br>Laboratory,<br>Pharmacy | Orlu, Imo State                                      | Okigwe (Okigwe)          | Imo |
| 2662 | IM/0013 | IM/0013/S/3  | Our Lady Of Mercy<br>Hospital & Mat. |                                                                                                         | 102/104 Royce Road,<br>Owerri                        | Owerri West<br>(Umuguma) | Imo |
| 2663 | IM/0015 | IM/0015/S/3  | First Concepts Hospital              |                                                                                                         | 105, Ikenegbu Layout,<br>Owerri                      | Owerri Urban<br>(Owerri) | Imo |
| 2664 | IM/0015 | IM/0015/S/5  | First Concepts Hospital              |                                                                                                         | 105, Ikenegbu Layout,<br>Owerri                      | Owerri Urban<br>(Owerri) | Imo |
| 2665 | IM/0017 | IM/0017/S/1  | Angboso Specialist<br>Hospital       |                                                                                                         | Plot P6 Work Layout, Owerri                          | Owerri Urban<br>(Owerri) | Imo |
| 2666 | IM/0018 | IM/0018/S/3  | Umezuruike Hospital                  |                                                                                                         | 21 Umezuruike Street,<br>Owerri                      | Owerri Urban<br>(Owerri) | Imo |
| 2667 | IM/0018 | IM/0018/S/7  | Umezuruike Hospital                  |                                                                                                         | 21 Umezuruike Street,<br>Owerri                      | Owerri Urban<br>(Owerri) | Imo |
| 2668 | IM/0018 | IM/0018/S/1  | Umezuruike Hospital                  |                                                                                                         | 21 Umezuruike Street,<br>Owerri                      | Owerri Urban<br>(Owerri) | Imo |
| 2669 | IM/0018 | IM/0018/S/2  | Umezuruike Hospital                  |                                                                                                         | 21 Umezuruike Street,<br>Owerri                      | Owerri Urban<br>(Owerri) | Imo |
| 2670 | IM/0018 | IM/0018/S/13 | Umezuruike Hospital                  |                                                                                                         | 21 Umezuruike Street,<br>Owerri                      | Owerri Urban<br>(Owerri) | Imo |
| 2671 | IM/0022 | IM/0022/S/3  | Ngozi Hospital &<br>Maternity        |                                                                                                         | Plot 72, Okigwe Road<br>Layout, Owerri.              | Owerri Urban<br>(Owerri) | Imo |
| 2672 | IM/0024 | IM/0024/S/1  | Ezem Medical Centre                  |                                                                                                         | 4 Osuji Street, Owerri                               | Owerri Urban<br>(Owerri) | Imo |
| 2673 | IM/0024 | IM/0024/S/5  | Ezem Medical Centre                  |                                                                                                         | 4 Osuji Street, Owerri                               | Owerri Urban<br>(Owerri) | Imo |
| 2674 | IM/0024 | IM/0024/S/3  | Ezem Medical Centre                  |                                                                                                         | 4 Osuji Street, Owerri                               | Owerri Urban<br>(Owerri) | Imo |
| 2675 | IM/0029 | IM/0029/S/3  | St. Elizabeth Hospital               |                                                                                                         | 10 Govt. House/Shell Camp<br>Road, Owerri, Imo State | Owerri Urban<br>(Owerri) | Imo |
| 2676 | IM/0030 | IM/0030/S/5  | Akaraugo Hospital &<br>Maternity     |                                                                                                         | 3, Egbukole Street,<br>Ikenegbu, Imo State           | Owerri Urban<br>(Owerri) | Imo |
| 2677 | IM/0030 | IM/0030/S/14 | Akaraugo Hospital &<br>Maternity     |                                                                                                         | 3, Egbukole Street,<br>Ikenegbu, Imo State           | Owerri Urban<br>(Owerri) | Imo |

|      |         |              |                                 |                                                                                                                      |                                                                                      |                            |     |
|------|---------|--------------|---------------------------------|----------------------------------------------------------------------------------------------------------------------|--------------------------------------------------------------------------------------|----------------------------|-----|
| 2678 | IM/0031 | IM/0031/S/2  | Life Spring Specialist Hospital |                                                                                                                      | Plot 49, Okigwe Road Layout, Owerri, Imo State                                       | Owerri Urban (Owerri)      | Imo |
| 2679 | IM/0032 | IM/0032/S/5  | Jone Medical Centre             |                                                                                                                      | Plot 189 Ikenegbu Layout Extension, through Chukwuma Nwoha Street, Owerri, Imo State | Owerri Urban (Owerri)      | Imo |
| 2680 | IM/0032 | IM/0032/S/3  | Jone Medical Centre             |                                                                                                                      | Plot 189 Ikenegbu Layout Extension, through Chukwuma Nwoha Street, Owerri, Imo State | Owerri Urban (Owerri)      | Imo |
| 2681 | IM/0032 | IM/0032/S/2  | Jone Medical Centre             |                                                                                                                      | Plot 189 Ikenegbu Layout Extension, through Chukwuma Nwoha Street, Owerri, Imo State | Owerri Urban (Owerri)      | Imo |
| 2682 | IM/0034 | IM/0034/S/5  | Ikenegbu Hospital & Maternity   |                                                                                                                      | Plot 11 & 13 Amadi Crescent, Okigwe Road Layout, Owerri, Imo                         | Owerri Urban (Owerri)      | Imo |
| 2683 | IM/0034 | IM/0034/S/4  | Ikenegbu Hospital & Maternity   |                                                                                                                      | Plot 11 & 13 Amadi Crescent, Okigwe Road Layout, Owerri, Imo                         | Owerri Urban (Owerri)      | Imo |
| 2684 | IM/0034 | IM/0034/S/1  | Ikenegbu Hospital & Maternity   |                                                                                                                      | Plot 11 & 13 Amadi Crescent, Okigwe Road Layout, Owerri, Imo                         | Owerri Urban (Owerri)      | Imo |
| 2685 | IM/0034 | IM/0034/S/6  | Ikenegbu Hospital & Maternity   |                                                                                                                      | Plot 11 & 13 Amadi Crescent, Okigwe Road Layout, Owerri, Imo                         | Owerri Urban (Owerri)      | Imo |
| 2686 | IM/0034 | IM/0034/S/3  | Ikenegbu Hospital & Maternity   |                                                                                                                      | Plot 11 & 13 Amadi Crescent, Okigwe Road Layout, Owerri, Imo                         | Owerri Urban (Owerri)      | Imo |
| 2687 | IM/0034 | IM/0034/S/2  | Ikenegbu Hospital & Maternity   |                                                                                                                      | Plot 11 & 13 Amadi Crescent, Okigwe Road Layout, Owerri, Imo                         | Owerri Urban (Owerri)      | Imo |
| 2688 | IM/0034 | IM/0034/S/7  | Ikenegbu Hospital & Maternity   |                                                                                                                      | Plot 11 & 13 Amadi Crescent, Okigwe Road Layout, Owerri, Imo                         | Owerri Urban (Owerri)      | Imo |
| 2689 | IM/0035 | IM/0035/S/3  | St. David's Hospital            |                                                                                                                      | 14, Mbari Street, Ikenegbu, Owerri, Imo State                                        | Owerri Urban (Owerri)      | Imo |
| 2690 | IM/0042 | IM/0042/S/3  | St. David's Hospital            | O & G, Surgery, Radiology, Laboratory, ECG, Pharmacy, Int. medicine, Paediatrics, Orthopaedic surgery, Physiotherapy | 14, Mbari Street, Ikenegbu, Owerri, Imo State                                        | Owerri Urban (Owerri)      | Imo |
| 2691 | IM/0047 | IM/0047/S/4  | Pharm. Sense Pharmacy           | Pharmacy                                                                                                             | MCC Road, Owerri, Imo State                                                          | Owerri Urban (Owerri)      | Imo |
| 2692 | IM/0049 | IM/0049/S/4  | Choice Pharmacy                 | Pharmacy                                                                                                             | 4 Ihechiowa Street, Ikenegbu Ext. Owerri                                             | Owerri Urban (Owerri)      | Imo |
| 2693 | IM/0050 | IM/0050/S/4  | Pathway Pharmacy Ltd.           | Pharmacy                                                                                                             | Plot 170 Ikenegbu Layout, Owerri                                                     | Owerri Urban (Owerri)      | Imo |
| 2694 | IM/0052 | IM/0052/S/4  | Little Wood Pharmacy Ltd.       | Pharmacy                                                                                                             | 129, Royce Road, Owerri                                                              | Owerri Urban (Owerri)      | Imo |
| 2695 | IM/0054 | IM/0054/S/4  | Drug Wyse Pharmacy Ltd.         | Pharmacy                                                                                                             | 62, Wethdral Road, Owerri                                                            | Owerri Urban (Owerri)      | Imo |
| 2696 | IM/0055 | IM/0055/S/4  | Adonai Pharmacy Ltd.            | Pharmacy                                                                                                             | 125, Tetlow Road, Owerri                                                             | Owerri Urban (Owerri)      | Imo |
| 2697 | IM/0056 | IM/0056/S/4  | Akali Pharmacy Ltd.             | Pharmacy                                                                                                             | 34 Tetlow Road, Owerri                                                               | Owerri Urban (Owerri)      | Imo |
| 2698 | IM/0060 | IM/0060/S/5  | New Cross Hospital Ltd.         |                                                                                                                      | 5, New Cross Hospital Street, Ugwuorji, Owerri                                       | Owerri North (Orie Uratta) | Imo |
| 2699 | IM/0061 | IM/0061/S/3  | Aladinma Hospital               |                                                                                                                      | Transfiguration Road, Owerri, Imo State                                              | Owerri North (Orie Uratta) | Imo |
| 2700 | IM/0061 | IM/0061/S/1  | Aladinma Hospital               |                                                                                                                      | Transfiguration Road, Owerri, Imo State                                              | Owerri North (Orie Uratta) | Imo |
| 2701 | IM/0064 | IM/0064/S/4  | Villa Pharm. Chem Ltd.          | Pharmacy                                                                                                             | 18A Orlu Road, Owerri                                                                | Owerri Urban (Owerri)      | Imo |
| 2702 | IM/0066 | IM/0066/S/6  | Uchenna Hospital & Maternity    |                                                                                                                      | 10/12 Eniweruzoh Crescent Owerri                                                     | Owerri West (Umuguma)      | Imo |
| 2703 | IM/0066 | IM/0066/S/1  | Uchenna Hospital & Maternity    |                                                                                                                      | 10/12 Eniweruzoh Crescent Owerri                                                     | Owerri West (Umuguma)      | Imo |
| 2704 | IM/0066 | IM/0066/S/3  | Uchenna Hospital & Maternity    |                                                                                                                      | 10/12 Eniweruzoh Crescent Owerri                                                     | Owerri West (Umuguma)      | Imo |
| 2705 | IM/0068 | IM/0068/S/10 | Christiana Specialist Hospital  |                                                                                                                      | Egbu/Emuoba Rd., Owerri                                                              | Owerri Urban (Owerri)      | Imo |
| 2706 | IM/0070 | IM/0070/S/1  | Six C. Specialist Clinic        |                                                                                                                      | 28/30 Orlu Road, Imo State                                                           | Owerri Urban (Owerri)      | Imo |
| 2707 | IM/0073 | IM/0073/S/2  | Capital Health Hospital         |                                                                                                                      | 44 Oyima Street, Owerri, Imo State                                                   | Owerri Urban (Owerri)      | Imo |
| 2708 | IM/0075 | IM/0075/S/8  | General Hospital                | General Surgery, O & G, Paediatrics, Dental, Laboratory, Pharmacy                                                    | New Owerri, Owerri, Imo State                                                        | Owerri Urban (Owerri)      | Imo |

|      |         |              |                                                       |                                                                                  |                                                          |                               |     |
|------|---------|--------------|-------------------------------------------------------|----------------------------------------------------------------------------------|----------------------------------------------------------|-------------------------------|-----|
| 2709 | IM/0075 | IM/0075/S/5  | General Hospital                                      | General Surgery,<br>O & G,<br>Paediatrics,<br>Dental,<br>Laboratory,<br>Pharmacy | New Owerri, Owerri, Imo<br>State                         | Owerri Urban<br>(Owerri)      | Imo |
| 2710 | IM/0075 | IM/0075/S/4  | General Hospital                                      | General Surgery,<br>O & G,<br>Paediatrics,<br>Dental,<br>Laboratory,<br>Pharmacy | New Owerri, Owerri, Imo<br>State                         | Owerri Urban<br>(Owerri)      | Imo |
| 2711 | IM/0075 | IM/0075/S/3  | General Hospital                                      | General Surgery,<br>O & G,<br>Paediatrics,<br>Dental,<br>Laboratory,<br>Pharmacy | New Owerri, Owerri, Imo<br>State                         | Owerri Urban<br>(Owerri)      | Imo |
| 2712 | IM/0075 | IM/0075/S    | General Hospital                                      | General Surgery,<br>O & G,<br>Paediatrics,<br>Dental,<br>Laboratory,<br>Pharmacy | New Owerri, Owerri, Imo<br>State                         | Owerri Urban<br>(Owerri)      | Imo |
| 2713 | IM/0075 | IM/0075/S/6  | General Hospital                                      | General Surgery,<br>O & G,<br>Paediatrics,<br>Dental,<br>Laboratory,<br>Pharmacy | New Owerri, Owerri, Imo<br>State                         | Owerri Urban<br>(Owerri)      | Imo |
| 2714 | IM/0081 | IM/0081/S/6  | Oliva Specialist<br>Hospital                          | Paediatrics                                                                      | Concord Village, Owerri,<br>Imo State                    | Owerri Urban<br>(Owerri)      | Imo |
| 2715 | IM/0083 | IM/0083/S/15 | Floxy Pan-Opticum Eye<br>Specialist Hosp.             | Ophthalmology                                                                    | 464, Tony Okeke Str., Prefab<br>Owerri                   | Owerri Urban<br>(Owerri)      | Imo |
| 2716 | IM/0086 | IM/0086/S/4  | Oben Pharmacy Ltd.                                    | Pharmacy                                                                         | Emekuku, Km8, Emekuku<br>Road                            | Ahiazu Mbaise                 | Imo |
| 2717 | IM/0093 | IM/0093/S/1  | Imo State Specialist<br>Hospital, Owerri              |                                                                                  | New Owerri, Imo State                                    | Owerri North<br>(Orie Uratta) | Imo |
| 2718 | IM/0093 | IM/0093/S/4  | Imo State Specialist<br>Hospital, Owerri              |                                                                                  | New Owerri, Imo State                                    | Owerri North<br>(Orie Uratta) | Imo |
| 2719 | IM/0093 | IM/0093/S/5  | Imo State Specialist<br>Hospital, Owerri              |                                                                                  | New Owerri, Imo State                                    | Owerri North<br>(Orie Uratta) | Imo |
| 2720 | IM/0093 | IM/0093/S/8  | Imo State Specialist<br>Hospital, Owerri              |                                                                                  | New Owerri, Imo State                                    | Owerri North<br>(Orie Uratta) | Imo |
| 2721 | IM/0093 | IM/0093/S/6  | Imo State Specialist<br>Hospital, Owerri              |                                                                                  | New Owerri, Imo State                                    | Owerri North<br>(Orie Uratta) | Imo |
| 2722 | IM/0093 | IM/0093/S/3  | Imo State Specialist<br>Hospital, Owerri              |                                                                                  | New Owerri, Imo State                                    | Owerri North<br>(Orie Uratta) | Imo |
| 2723 | IM/0094 | IM/0094/S/2  | Federal Medical<br>Centre, Owerri                     |                                                                                  | Owerri, Imo State                                        | Owerri Urban<br>(Owerri)      | Imo |
| 2724 | IM/0094 | IM/0094/S/5  | Federal Medical<br>Centre, Owerri                     |                                                                                  | Owerri, Imo State                                        | Owerri Urban<br>(Owerri)      | Imo |
| 2725 | IM/0094 | IM/0094/S/7  | Federal Medical<br>Centre, Owerri                     |                                                                                  | Owerri, Imo State                                        | Owerri Urban<br>(Owerri)      | Imo |
| 2726 | IM/0094 | IM/0094/S/4  | Federal Medical<br>Centre, Owerri                     |                                                                                  | Owerri, Imo State                                        | Owerri Urban<br>(Owerri)      | Imo |
| 2727 | IM/0094 | IM/0094/S/11 | Federal Medical<br>Centre, Owerri                     |                                                                                  | Owerri, Imo State                                        | Owerri Urban<br>(Owerri)      | Imo |
| 2728 | IM/0094 | IM/0094/S/10 | Federal Medical<br>Centre, Owerri                     |                                                                                  | Owerri, Imo State                                        | Owerri Urban<br>(Owerri)      | Imo |
| 2729 | IM/0094 | IM/0094/S/8  | Federal Medical<br>Centre, Owerri                     |                                                                                  | Owerri, Imo State                                        | Owerri Urban<br>(Owerri)      | Imo |
| 2730 | IM/0094 | IM/0094/S/12 | Federal Medical<br>Centre, Owerri                     |                                                                                  | Owerri, Imo State                                        | Owerri Urban<br>(Owerri)      | Imo |
| 2731 | IM/0094 | IM/0094/S/6  | Federal Medical<br>Centre, Owerri                     |                                                                                  | Owerri, Imo State                                        | Owerri Urban<br>(Owerri)      | Imo |
| 2732 | IM/0094 | IM/0094/S/1  | Federal Medical<br>Centre, Owerri                     |                                                                                  | Owerri, Imo State                                        | Owerri Urban<br>(Owerri)      | Imo |
| 2733 | IM/0094 | IM/0094/S/3  | Federal Medical<br>Centre, Owerri                     |                                                                                  | Owerri, Imo State                                        | Owerri Urban<br>(Owerri)      | Imo |
| 2734 | IM/0094 | IM/0094/S/15 | Federal Medical<br>Centre, Owerri                     |                                                                                  | Owerri, Imo State                                        | Owerri Urban<br>(Owerri)      | Imo |
| 2735 | IM/0100 | IM/0100/S/2  | Uchendu Hospital                                      |                                                                                  | 98 Douglas Rd. Owerri                                    | Owerri Urban<br>(Owerri)      | Imo |
| 2736 | IM/0105 | IM/0105/S/5  | Nkire Med. Diagnostic<br>Lab.                         | Laboratory                                                                       | Eke-Nguru-Aboh Road (Near<br>Customary Court), Imo State | Aboh Mbaise                   | Imo |
| 2737 | IM/0108 | IM/0108/S/4  | Destiny Pharmacy                                      | Pharmacy                                                                         | Works Layout, Near IMSU<br>Junction, Owerri              | Owerri Urban<br>(Owerri)      | Imo |
| 2738 | IM/0112 | IM/0112/S/5  | Federal Polytechnic<br>Medical Centre,<br>Nekede      |                                                                                  | Nekede, Owerri, Imo State                                | Owerri West<br>(Umuguma)      | Imo |
| 2739 | IM/0112 | IM/0112/S/4  | Federal Polytechnic<br>Medical Centre,<br>Nekede      |                                                                                  | Nekede, Owerri, Imo State                                | Owerri West<br>(Umuguma)      | Imo |
| 2740 | IM/0115 | IM/0115/S/5  | Federal University of<br>Technology Medical<br>Centre |                                                                                  | Ihiagwa, Owerri, Imo State                               | Owerri West<br>(Umuguma)      | Imo |



|      |         |              |                                                              |                   |                                                               |                             |     |
|------|---------|--------------|--------------------------------------------------------------|-------------------|---------------------------------------------------------------|-----------------------------|-----|
| 2741 | IM/0115 | IM/0115/S/4  | Federal University of Technology Medical Centre              |                   | Ihiagwa, Owerri, Imo State                                    | Owerri West (Umuguma)       | Imo |
| 2742 | IM/0115 | IM/0115/S/1  | Federal University of Technology Medical Centre              |                   | Ihiagwa, Owerri, Imo State                                    | Owerri West (Umuguma)       | Imo |
| 2743 | IM/0118 | IM/0118/S/3  | Amanda Hospital                                              |                   | Plot 412/415 Works Layout, Owerri, Imo State                  | Owerri North (Orie Uratta)  | Imo |
| 2744 | IM/0118 | IM/0118/S/5  | Amanda Hospital                                              |                   | Plot 412/415 Works Layout, Owerri, Imo State                  | Owerri North (Orie Uratta)  | Imo |
| 2745 | IM/0118 | IM/0118/S/7  | Amanda Hospital                                              |                   | Plot 412/415 Works Layout, Owerri, Imo State                  | Owerri North (Orie Uratta)  | Imo |
| 2746 | IM/0124 | IM/0124/S/1  | International Christian Hospitals                            |                   | 11 WAAST AVENUE, IKENEGBU                                     | Owerri Urban (Owerri)       | Imo |
| 2747 | IM/0124 | IM/0124/S/5  | International Christian Hospitals                            |                   | 11 WAAST AVENUE, IKENEGBU                                     | Owerri Urban (Owerri)       | Imo |
| 2748 | IM/0125 | IM/0125/S/3  | EBUBEDIKE MEMORIAL HOSPITAL                                  |                   | 71, OPARANOZIE STR. OWERRI                                    | Owerri Urban (Owerri)       | Imo |
| 2749 | IM/0129 | IM/0129/S/2  | ETITI MEDICAL CENTER                                         |                   | Etiti Isinweke Ihitte Owerri                                  | Ihitte/Uboma (Isinweke)     | Imo |
| 2750 | IM/0136 | IM/0136/S/5  | CHARLES MED. LAB.                                            | Laboratory        | 8, NEW NO 4 MBAISE ROAD,OWERRI                                | Owerri Urban (Owerri)       | Imo |
| 2751 | IM/0138 | IM/0138/S/4  | CORPUS CHRISTI(MONICA MEMORIAL) HOSPITAL                     | Laboratory        | AMUZI AHIARA                                                  | Ahiazu Mbaise               | Imo |
| 2752 | IM/0138 | IM/0138/S/5  | CORPUS CHRISTI(MONICA MEMORIAL) HOSPITAL                     | Laboratory        | AMUZI AHIARA                                                  | Ahiazu Mbaise               | Imo |
| 2753 | IM/0139 | IM/0139/S/5  | KENIKON MEDICAL DIAG                                         | LAB.              | PLOT 267, IKENEGBU L/OUT, OWERRI                              | Owerri Urban (Owerri)       | Imo |
| 2754 | IM/0140 | IM/0140/S/4  | L'DUTY CHEMIST                                               | Pharmacy          | 103, WETHERAL ROAD, OWERRI                                    | Owerri Urban (Owerri)       | Imo |
| 2755 | IM/0144 | IM/0144/S/15 | Niger Optical & Services                                     | Ophthalmology     | 3, IHIOMA ROAD, ORLU                                          | Orlu                        | Imo |
| 2756 | IM/0146 | IM/0146/S/15 | RISLORI OPTICAL SERVICES & EYE CLINIC                        | Ophthalmology     | PLOT 271, IKENEGBU L/OUT, OWERRI                              | Owerri Urban (Owerri)       | Imo |
| 2757 | IM/0151 | IM/0151/S/15 | Sheerah Vision Eye Clinic                                    | Ophthalmology     | 1 Umez Eronine Street, Owerri                                 | Owerri Urban (Owerri)       | Imo |
| 2758 | IM/0173 | IM/0173/S/10 | Imo State University Teaching Hospital Primary Health Centre |                   | Orlu                                                          | Orlu                        | Imo |
| 2759 | IM/0185 | IM/0185/S/15 | Camella Eye Clinic                                           | Ophthalmology     | 126 Okigwe Road, Opp Summit Hotel, Owerri                     | Owerri Urban (Owerri)       | Imo |
| 2760 | IM/0186 | IM/0186/S/4  | Milam Pharmacy                                               | Pharmacy          | 4 Douglas Road, Owerri                                        | Owerri Urban (Owerri)       | Imo |
| 2761 | IM/0189 | IM/0189/S/3  | New Annex Specialist Hospital                                |                   | Plot 989, Amakohia, Owerri                                    | Owerri North (Orie Uratta)  | Imo |
| 2762 | IM/0192 | IM/0192/S/5  | Step 1 Medical Laboratories                                  |                   | 146, Royce Road, Owerri, Imo State                            | Owerri Urban (Owerri)       | Imo |
| 2763 | IM/0194 | IM/0194/S/5  | Bettina Medical Centre                                       | Laboratory, O & G | 11 Old Okigwe Road, Owerri                                    | Owerri Urban (Owerri)       | Imo |
| 2764 | IM/0194 | IM/0194/S/3  | Bettina Medical Centre                                       | Laboratory, O & G | 11 Old Okigwe Road, Owerri                                    | Owerri Urban (Owerri)       | Imo |
| 2765 | IM/0196 | IM/0196/S/7  | Alvan Ikoku Medical Center                                   |                   | Owerri                                                        | Owerri Urban (Owerri)       | Imo |
| 2766 | IM/0196 | IM/0196/S/4  | Alvan Ikoku Medical Center                                   |                   | Owerri                                                        | Owerri Urban (Owerri)       | Imo |
| 2767 | IM/0196 | IM/0196/S/5  | Alvan Ikoku Medical Center                                   |                   | Owerri                                                        | Owerri Urban (Owerri)       | Imo |
| 2768 | IM/0197 | IM/0197/S/3  | Vaden Specialist Clinic and Maternity                        |                   | 4B, Solid Rock road, off World Bank Road, Owerri              | Owerri Urban (Owerri)       | Imo |
| 2769 | IM/0198 | IM/0198/S/15 | St. Joseph's Eye Hospital                                    |                   | Mgbirichi, Ohaji Egbema, Imo State                            | Ohaji/Egbema (Mmahu-Egbema) | Imo |
| 2770 | IM/0200 | IM/0200/S/5  | Six Star Laboratory Ltd                                      |                   | No. 5, Anyanwuocha Street, Akwakuma, Owerri, Imo State        | Owerri North (Orie Uratta)  | Imo |
| 2771 | IM/0202 | IM/0202/S/4  | Triple A Pharmacy Plus                                       |                   | No. 9, Mere Street, Owerri, Imo State                         | Owerri Urban (Owerri)       | Imo |
| 2772 | IM/0203 | IM/0203/S/5  | A C E Medical Laboratory & Diagnostic Centre                 |                   | No. 9, Mere Street, Owerri, Imo State                         | Owerri Urban (Owerri)       | Imo |
| 2773 | IM/0204 | IM/0204/S/1  | Steps of Faith Hospital                                      |                   | No. 9, Mere Street, Owerri, Imo State                         | Owerri Urban (Owerri)       | Imo |
| 2774 | IM/0204 | IM/0204/S/2  | Steps of Faith Hospital                                      |                   | No. 9, Mere Street, Owerri, Imo State                         | Owerri Urban (Owerri)       | Imo |
| 2775 | IM/0205 | IM/0205/S/5  | Human Race Specialist Medical Diagnostic Centre              |                   | Plot 111/112, Naze Industrial Estate, Naze, Owerri, Imo State | Owerri North (Orie Uratta)  | Imo |
| 2776 | IM/0205 | IM/0205/S/7  | Human Race Specialist Medical Diagnostic Centre              |                   | Plot 111/112, Naze Industrial Estate, Naze, Owerri, Imo State | Owerri North (Orie Uratta)  | Imo |

|      |         |              |                                  |  |                                                                          |                            |        |
|------|---------|--------------|----------------------------------|--|--------------------------------------------------------------------------|----------------------------|--------|
| 2777 | IM/0208 | IM/0208/S/6  | FamilyCare Specialist Clinics    |  | New Owerri, Imo State                                                    | Owerri West (Umuguma)      | Imo    |
| 2778 | IM/0208 | IM/0208/S/3  | FamilyCare Specialist Clinics    |  | New Owerri, Imo State                                                    | Owerri West (Umuguma)      | Imo    |
| 2779 | IM/0208 | IM/0208/S/1  | FamilyCare Specialist Clinics    |  | New Owerri, Imo State                                                    | Owerri West (Umuguma)      | Imo    |
| 2780 | IM/0209 | IM/0209/S/3  | St. Damian's Hospital            |  | Okporo Orlu, Imo State                                                   | Orlu                       | Imo    |
| 2781 | IM/0209 | IM/0209/S/5  | St. Damian's Hospital            |  | Okporo Orlu, Imo State                                                   | Orlu                       | Imo    |
| 2782 | IM/0209 | IM/0209/S/2  | St. Damian's Hospital            |  | Okporo Orlu, Imo State                                                   | Orlu                       | Imo    |
| 2783 | IM/0212 | IM/0212/S/3  | Salvation Hospital and Maternity |  | Nwaorienkpu, Ekwe, Imo State                                             | Isu (Umundugba)            | Imo    |
| 2784 | IM/0212 | IM/0212/S/7  | Salvation Hospital and Maternity |  | Nwaorienkpu, Ekwe, Imo State                                             | Isu (Umundugba)            | Imo    |
| 2785 | IM/0213 | IM/0213/S/8  | Anneeth Health Services          |  | Plot 14 Civic Centre Ext.No 8 Athan Ogoh Avenue,New Owerri Imo State     | Owerri Urban (Owerri)      | Imo    |
| 2786 | IM/0215 | IM/0215/S/5  | Digoe Hospital                   |  | 5,Orlu Road Owerri Imo State                                             | Owerri North (Orie Uratta) | Imo    |
| 2787 | IM/0217 | IM/0217/S/5  | Digoe Hospital                   |  | 5,Orlu Road Owerri Imo State                                             | Owerri North (Orie Uratta) | Imo    |
| 2788 | IM/0219 | IM/0219/S/1  | Zennia Hospital & Maternity      |  | No 1 Road 17, Federal Housing Umuguma, Owerri Imo State                  | Owerri West (Umuguma)      | Imo    |
| 2789 | IM/0219 | IM/0219/S/2  | Zennia Hospital & Maternity      |  | No 1 Road 17, Federal Housing Umuguma, Owerri Imo State                  | Owerri West (Umuguma)      | Imo    |
| 2790 | IM/0219 | IM/0219/S/5  | Zennia Hospital & Maternity      |  | No 1 Road 17, Federal Housing Umuguma, Owerri Imo State                  | Owerri West (Umuguma)      | Imo    |
| 2791 | IM/0220 | IM/0220/S/13 | Silver Spring Eye Care Ltd       |  | Plot 12 Ikenegbu Ext, Off MCC Road, By London Bus Stop, Owerri Imo State | Owerri Urban (Owerri)      | Imo    |
| 2792 | IM/0227 | IM/0227/S/8  | Patriot Dental Clinic            |  | 98A Okigwe Road, Owerri, Imo State                                       | Owerri Urban (Owerri)      | Imo    |
| 2793 | JG/0001 | JG/0001/S/3  | General Hospital, Dutse          |  | Dutse, Jigawa State                                                      | Dutse                      | Jigawa |
| 2794 | JG/0001 | JG/0001/S/4  | General Hospital, Dutse          |  | Dutse, Jigawa State                                                      | Dutse                      | Jigawa |
| 2795 | JG/0001 | JG/0001/S/2  | General Hospital, Dutse          |  | Dutse, Jigawa State                                                      | Dutse                      | Jigawa |
| 2796 | JG/0001 | JG/0001/S/6  | General Hospital, Dutse          |  | Dutse, Jigawa State                                                      | Dutse                      | Jigawa |
| 2797 | JG/0001 | JG/0001/S/5  | General Hospital, Dutse          |  | Dutse, Jigawa State                                                      | Dutse                      | Jigawa |
| 2798 | JG/0002 | JG/0002/S/6  | Jahun General Hospital           |  | Jahun, Jigawa State                                                      | Jahun                      | Jigawa |
| 2799 | JG/0002 | JG/0002/S/3  | Jahun General Hospital           |  | Jahun, Jigawa State                                                      | Jahun                      | Jigawa |
| 2800 | JG/0002 | JG/0002/S/5  | Jahun General Hospital           |  | Jahun, Jigawa State                                                      | Jahun                      | Jigawa |
| 2801 | JG/0003 | JG/0003/S/15 | General Hospital, Hadejia        |  | Hadejia, Jigawa State                                                    | Hadejia                    | Jigawa |
| 2802 | JG/0003 | JG/0003/S/2  | General Hospital, Hadejia        |  | Hadejia, Jigawa State                                                    | Hadejia                    | Jigawa |
| 2803 | JG/0003 | JG/0003/S/3  | General Hospital, Hadejia        |  | Hadejia, Jigawa State                                                    | Hadejia                    | Jigawa |
| 2804 | JG/0003 | JG/0003/S/1  | General Hospital, Hadejia        |  | Hadejia, Jigawa State                                                    | Hadejia                    | Jigawa |
| 2805 | JG/0003 | JG/0003/S/5  | General Hospital, Hadejia        |  | Hadejia, Jigawa State                                                    | Hadejia                    | Jigawa |
| 2806 | JG/0005 | JG/0005/S/4  | General Hospital, Gumel          |  | Gumel, Jigawa State                                                      | Gumel                      | Jigawa |
| 2807 | JG/0005 | JG/0005/S/15 | General Hospital, Gumel          |  | Gumel, Jigawa State                                                      | Gumel                      | Jigawa |
| 2808 | JG/0005 | JG/0005/S/5  | General Hospital, Gumel          |  | Gumel, Jigawa State                                                      | Gumel                      | Jigawa |
| 2809 | JG/0005 | JG/0005/S/3  | General Hospital, Gumel          |  | Gumel, Jigawa State                                                      | Gumel                      | Jigawa |
| 2810 | JG/0005 | JG/0005/S/2  | General Hospital, Gumel          |  | Gumel, Jigawa State                                                      | Gumel                      | Jigawa |
| 2811 | JG/0005 | JG/0005/S/1  | General Hospital, Gumel          |  | Gumel, Jigawa State                                                      | Gumel                      | Jigawa |
| 2812 | JG/0006 | JG/0006/S/6  | General Hospital, Kazaure        |  | Kazaure, Jigawa State                                                    | Kazaure                    | Jigawa |
| 2813 | JG/0006 | JG/0006/S/1  | General Hospital, Kazaure        |  | Kazaure, Jigawa State                                                    | Kazaure                    | Jigawa |
| 2814 | JG/0006 | JG/0006/S/15 | General Hospital, Kazaure        |  | Kazaure, Jigawa State                                                    | Kazaure                    | Jigawa |
| 2815 | JG/0006 | JG/0006/S/4  | General Hospital, Kazaure        |  | Kazaure, Jigawa State                                                    | Kazaure                    | Jigawa |
| 2816 | JG/0008 | JG/0008/S/2  | General Hospital, Ringim         |  | Ringim, Jigawa State                                                     | Ringim                     | Jigawa |
| 2817 | JG/0008 | JG/0008/S/6  | General Hospital, Ringim         |  | Ringim, Jigawa State                                                     | Ringim                     | Jigawa |

|      |         |              |                                       |  |                          |              |        |
|------|---------|--------------|---------------------------------------|--|--------------------------|--------------|--------|
| 2818 | JG/0008 | JG/0008/S/3  | General Hospital, Ringim              |  | Ringim, Jigawa State     | Ringim       | Jigawa |
| 2819 | JG/0008 | JG/0008/S/5  | General Hospital, Ringim              |  | Ringim, Jigawa State     | Ringim       | Jigawa |
| 2820 | JG/0008 | JG/0008/S/4  | General Hospital, Ringim              |  | Ringim, Jigawa State     | Ringim       | Jigawa |
| 2821 | JG/0009 | JG/0009/S/12 | Federal Medical Centre, Birnin Kudu   |  | Brnin Kudu, Jigawa State | Birnin Kudu  | Jigawa |
| 2822 | JG/0009 | JG/0009/S/7  | Federal Medical Centre, Birnin Kudu   |  | Brnin Kudu, Jigawa State | Birnin Kudu  | Jigawa |
| 2823 | JG/0009 | JG/0009/S/11 | Federal Medical Centre, Birnin Kudu   |  | Brnin Kudu, Jigawa State | Birnin Kudu  | Jigawa |
| 2824 | JG/0009 | JG/0009/S/1  | Federal Medical Centre, Birnin Kudu   |  | Brnin Kudu, Jigawa State | Birnin Kudu  | Jigawa |
| 2825 | JG/0009 | JG/0009/S/8  | Federal Medical Centre, Birnin Kudu   |  | Brnin Kudu, Jigawa State | Birnin Kudu  | Jigawa |
| 2826 | JG/0009 | JG/0009/S/5  | Federal Medical Centre, Birnin Kudu   |  | Brnin Kudu, Jigawa State | Birnin Kudu  | Jigawa |
| 2827 | JG/0009 | JG/0009/S/2  | Federal Medical Centre, Birnin Kudu   |  | Brnin Kudu, Jigawa State | Birnin Kudu  | Jigawa |
| 2828 | JG/0009 | JG/0009/S/3  | Federal Medical Centre, Birnin Kudu   |  | Brnin Kudu, Jigawa State | Birnin Kudu  | Jigawa |
| 2829 | JG/0009 | JG/0009/S/6  | Federal Medical Centre, Birnin Kudu   |  | Brnin Kudu, Jigawa State | Birnin Kudu  | Jigawa |
| 2830 | JG/0009 | JG/0009/S/4  | Federal Medical Centre, Birnin Kudu   |  | Brnin Kudu, Jigawa State | Birnin Kudu  | Jigawa |
| 2831 | JG/0009 | JG/0009/S/15 | Federal Medical Centre, Birnin Kudu   |  | Brnin Kudu, Jigawa State | Birnin Kudu  | Jigawa |
| 2832 | JG/0019 | JG/0019/S/13 | Police Clinics, Jigawa                |  | Jigawa State             | Dutse        | Jigawa |
| 2833 | JG/0019 | JG/0019/S/8  | Police Clinics, Jigawa                |  | Jigawa State             | Dutse        | Jigawa |
| 2834 | JG/0019 | JG/0019/S/5  | Police Clinics, Jigawa                |  | Jigawa State             | Dutse        | Jigawa |
| 2835 | JG/0019 | JG/0019/S/14 | Police Clinics, Jigawa                |  | Jigawa State             | Dutse        | Jigawa |
| 2836 | JG/0019 | JG/0019/S/11 | Police Clinics, Jigawa                |  | Jigawa State             | Dutse        | Jigawa |
| 2837 | JG/0019 | JG/0019/S/1  | Police Clinics, Jigawa                |  | Jigawa State             | Dutse        | Jigawa |
| 2838 | JG/0019 | JG/0019/S/7  | Police Clinics, Jigawa                |  | Jigawa State             | Dutse        | Jigawa |
| 2839 | JG/0027 | JG/0027/S/1  | Rasheed Shekoni Specialist Hospital   |  | Dutse, Jigawa            | Dutse        | Jigawa |
| 2840 | JG/0027 | JG/0027/S/7  | Rasheed Shekoni Specialist Hospital   |  | Dutse, Jigawa            | Dutse        | Jigawa |
| 2841 | JG/0027 | JG/0027/S/2  | Rasheed Shekoni Specialist Hospital   |  | Dutse, Jigawa            | Dutse        | Jigawa |
| 2842 | JG/0027 | JG/0027/S/3  | Rasheed Shekoni Specialist Hospital   |  | Dutse, Jigawa            | Dutse        | Jigawa |
| 2843 | JG/0027 | JG/0027/S/4  | Rasheed Shekoni Specialist Hospital   |  | Dutse, Jigawa            | Dutse        | Jigawa |
| 2844 | JG/0027 | JG/0027/S/6  | Rasheed Shekoni Specialist Hospital   |  | Dutse, Jigawa            | Dutse        | Jigawa |
| 2845 | JG/0027 | JG/0027/S/5  | Rasheed Shekoni Specialist Hospital   |  | Dutse, Jigawa            | Dutse        | Jigawa |
| 2846 | JG/0027 | JG/0027/S/13 | Rasheed Shekoni Specialist Hospital   |  | Dutse, Jigawa            | Dutse        | Jigawa |
| 2847 | JG/0027 | JG/0027/S/12 | Rasheed Shekoni Specialist Hospital   |  | Dutse, Jigawa            | Dutse        | Jigawa |
| 2848 | JG/0027 | JG/0027/S/8  | Rasheed Shekoni Specialist Hospital   |  | Dutse, Jigawa            | Dutse        | Jigawa |
| 2849 | KB/0001 | KB/0001/S/15 | General Hospital Argungu              |  | Argungu                  | Argungu      | Kebbi  |
| 2850 | KB/0001 | KB/0001/S/5  | General Hospital Argungu              |  | Argungu                  | Argungu      | Kebbi  |
| 2851 | KB/0001 | KB/0001/S/1  | General Hospital Argungu              |  | Argungu                  | Argungu      | Kebbi  |
| 2852 | KB/0001 | KB/0001/S/4  | General Hospital Argungu              |  | Argungu                  | Argungu      | Kebbi  |
| 2853 | KB/0001 | KB/0001/S/7  | General Hospital Argungu              |  | Argungu                  | Argungu      | Kebbi  |
| 2854 | KB/0001 | KB/0001/S/8  | General Hospital Argungu              |  | Argungu                  | Argungu      | Kebbi  |
| 2855 | KB/0003 | KB/0003/S/6  | Federal Medical Center - Birnin Kebbi |  | Birnin Kebbi             | Birnin Kebbi | Kebbi  |
| 2856 | KB/0003 | KB/0003/S/1  | Federal Medical Center - Birnin Kebbi |  | Birnin Kebbi             | Birnin Kebbi | Kebbi  |
| 2857 | KB/0003 | KB/0003/S/11 | Federal Medical Center - Birnin Kebbi |  | Birnin Kebbi             | Birnin Kebbi | Kebbi  |
| 2858 | KB/0003 | KB/0003/S/3  | Federal Medical Center - Birnin Kebbi |  | Birnin Kebbi             | Birnin Kebbi | Kebbi  |
| 2859 | KB/0003 | KB/0003/S/7  | Federal Medical Center - Birnin Kebbi |  | Birnin Kebbi             | Birnin Kebbi | Kebbi  |

|      |         |              |                                          |            |                                                                |              |        |
|------|---------|--------------|------------------------------------------|------------|----------------------------------------------------------------|--------------|--------|
| 2860 | KB/0003 | KB/0003/S/10 | Federal Medical Center<br>- Birnin Kebbi |            | Birnin Kebbi                                                   | Birnin Kebbi | Kebbi  |
| 2861 | KB/0003 | KB/0003/S/15 | Federal Medical Center<br>- Birnin Kebbi |            | Birnin Kebbi                                                   | Birnin Kebbi | Kebbi  |
| 2862 | KB/0003 | KB/0003/S/8  | Federal Medical Center<br>- Birnin Kebbi |            | Birnin Kebbi                                                   | Birnin Kebbi | Kebbi  |
| 2863 | KB/0003 | KB/0003/S/5  | Federal Medical Center<br>- Birnin Kebbi |            | Birnin Kebbi                                                   | Birnin Kebbi | Kebbi  |
| 2864 | KB/0003 | KB/0003/S/2  | Federal Medical Center<br>- Birnin Kebbi |            | Birnin Kebbi                                                   | Birnin Kebbi | Kebbi  |
| 2865 | KB/0003 | KB/0003/S/4  | Federal Medical Center<br>- Birnin Kebbi |            | Birnin Kebbi                                                   | Birnin Kebbi | Kebbi  |
| 2866 | KB/0008 | KB/0008/S/11 | Sir Yahaya Memorial<br>Hospital          |            | Ahmadu Bello Way, Birnin<br>Kebbi                              | Birnin Kebbi | Kebbi  |
| 2867 | KB/0008 | KB/0008/S/1  | Sir Yahaya Memorial<br>Hospital          |            | Ahmadu Bello Way, Birnin<br>Kebbi                              | Birnin Kebbi | Kebbi  |
| 2868 | KB/0008 | KB/0008/S/7  | Sir Yahaya Memorial<br>Hospital          |            | Ahmadu Bello Way, Birnin<br>Kebbi                              | Birnin Kebbi | Kebbi  |
| 2869 | KB/0008 | KB/0008/S/5  | Sir Yahaya Memorial<br>Hospital          |            | Ahmadu Bello Way, Birnin<br>Kebbi                              | Birnin Kebbi | Kebbi  |
| 2870 | KB/0008 | KB/0008/S/4  | Sir Yahaya Memorial<br>Hospital          |            | Ahmadu Bello Way, Birnin<br>Kebbi                              | Birnin Kebbi | Kebbi  |
| 2871 | KB/0008 | KB/0008/S/6  | Sir Yahaya Memorial<br>Hospital          |            | Ahmadu Bello Way, Birnin<br>Kebbi                              | Birnin Kebbi | Kebbi  |
| 2872 | KB/0008 | KB/0008/S/2  | Sir Yahaya Memorial<br>Hospital          |            | Ahmadu Bello Way, Birnin<br>Kebbi                              | Birnin Kebbi | Kebbi  |
| 2873 | KB/0012 | KB/0012/S/4  | Zetta Pharmacy                           | Pharmacy   | Opp. Haliru Abdul<br>Secretariat, Rafiu Atiku Rd,<br>B/Kebbi   | Birnin Kebbi | Kebbi  |
| 2874 | KB/0019 | KB/0019/S/5  | Apex Medical<br>Diagnostics              | Laboratory | Along Nagari Science<br>College Rd, Birnin Kebbi               | Birnin Kebbi | Kebbi  |
| 2875 | KB/0020 | KB/0020/S/5  | General Hospital, Yauri                  | -          | Yauri                                                          | Yauri        | Kebbi  |
| 2876 | KB/0020 | KB/0020/S/6  | General Hospital, Yauri                  | -          | Yauri                                                          | Yauri        | Kebbi  |
| 2877 | KB/0020 | KB/0020/S/1  | General Hospital, Yauri                  | -          | Yauri                                                          | Yauri        | Kebbi  |
| 2878 | KB/0020 | KB/0020/S/8  | General Hospital, Yauri                  | -          | Yauri                                                          | Yauri        | Kebbi  |
| 2879 | KB/0020 | KB/0020/S/15 | General Hospital, Yauri                  | -          | Yauri                                                          | Yauri        | Kebbi  |
| 2880 | KB/0020 | KB/0020/S/3  | General Hospital, Yauri                  | -          | Yauri                                                          | Yauri        | Kebbi  |
| 2881 | KB/0020 | KB/0020/S/4  | General Hospital, Yauri                  | -          | Yauri                                                          | Yauri        | Kebbi  |
| 2882 | KB/0020 | KB/0020/S/7  | General Hospital, Yauri                  | -          | Yauri                                                          | Yauri        | Kebbi  |
| 2883 | KB/0027 | KB/0027/S/8  | Martha Bamaïyi<br>General Hospital Zuru  |            | Zuru Bye-Pass Behind First<br>Bank, Zuru, Kebbi State          | Zuru         | Kebbi  |
| 2884 | KB/0027 | KB/0027/S/4  | Martha Bamaïyi<br>General Hospital Zuru  |            | Zuru Bye-Pass Behind First<br>Bank, Zuru, Kebbi State          | Zuru         | Kebbi  |
| 2885 | KB/0027 | KB/0027/S/1  | Martha Bamaïyi<br>General Hospital Zuru  |            | Zuru Bye-Pass Behind First<br>Bank, Zuru, Kebbi State          | Zuru         | Kebbi  |
| 2886 | KB/0027 | KB/0027/S/5  | Martha Bamaïyi<br>General Hospital Zuru  |            | Zuru Bye-Pass Behind First<br>Bank, Zuru, Kebbi State          | Zuru         | Kebbi  |
| 2887 | KB/0027 | KB/0027/S/3  | Martha Bamaïyi<br>General Hospital Zuru  |            | Zuru Bye-Pass Behind First<br>Bank, Zuru, Kebbi State          | Zuru         | Kebbi  |
| 2888 | KB/0029 | KB/0029/S/4  | Junju Pharmacy                           | Pharmacy   | Emir Haruna Road Opp<br>Texaco Filling Station, Kebbi<br>State | Birnin Kebbi | Kebbi  |
| 2889 | KB/0030 | KB/0030/S/4  | Kaduna<br>Pharmaceutical Ltd.            | Pharmacy   | 123 Ahmadu Bello Way,<br>P.O.Box 255, Zuru                     | Zuru         | Kebbi  |
| 2890 | KB/0033 | KB/0033/S/4  | junju pharmacy                           | Pharmacy   | emir. haruna road, opp<br>Texaco filling station               | Birnin Kebbi | Kebbi  |
| 2891 | KB/0034 | KB/0034/S/4  | Kauna pharmaceutical<br>Ltd.             | Pharmacy   | 123, ahmadu bello way,<br>zuru                                 | Zuru         | Kebbi  |
| 2892 | KB/0039 | KB/0039/S/2  | University Clinic<br>(F.U.B.K)           |            | Federal University Birnin<br>Kebbi, Kebbi State                | Birnin Kebbi | Kebbi  |
| 2893 | KD/0002 | KD/0002/S/4  | Complete Pharmacy<br>Ltd.                | Pharmacy   | L. 9, Chukun Road, Sabon<br>Tasha, kaduna                      | Kaduna South | Kaduna |
| 2894 | KD/0005 | KD/0005/S/2  | Air Force Medical<br>Centre Mando        |            | Kaduna                                                         | Igabi        | Kaduna |
| 2895 | KD/0005 | KD/0005/S/5  | Air Force Medical<br>Centre Mando        |            | Kaduna                                                         | Igabi        | Kaduna |
| 2896 | KD/0005 | KD/0005/S/4  | Air Force Medical<br>Centre Mando        |            | Kaduna                                                         | Igabi        | Kaduna |
| 2897 | KD/0005 | KD/0005/S/7  | Air Force Medical<br>Centre Mando        |            | Kaduna                                                         | Igabi        | Kaduna |

|      |         |              |                                                  |                        |                                                              |              |        |
|------|---------|--------------|--------------------------------------------------|------------------------|--------------------------------------------------------------|--------------|--------|
| 2898 | KD/0005 | KD/0005/S/8  | Air Force Medical Centre Mando                   |                        | Kaduna                                                       | Igabi        | Kaduna |
| 2899 | KD/0005 | KD/0005/S/11 | Air Force Medical Centre Mando                   |                        | Kaduna                                                       | Igabi        | Kaduna |
| 2900 | KD/0005 | KD/0005/S/14 | Air Force Medical Centre Mando                   |                        | Kaduna                                                       | Igabi        | Kaduna |
| 2901 | KD/0005 | KD/0005/S/1  | Air Force Medical Centre Mando                   |                        | Kaduna                                                       | Igabi        | Kaduna |
| 2902 | KD/0005 | KD/0005/S/3  | Air Force Medical Centre Mando                   |                        | Kaduna                                                       | Igabi        | Kaduna |
| 2903 | KD/0005 | KD/0005/S/6  | Air Force Medical Centre Mando                   |                        | Kaduna                                                       | Igabi        | Kaduna |
| 2904 | KD/0008 | KD/0008/S/5  | Abdul-Azeez Memorial Hospital Clinic & Maternity |                        | D.B. 10, Kabala West Road, Near Amaboni Hotal Tudun Wada,Kad | Kaduna South | Kaduna |
| 2905 | KD/0009 | KD/0009/S/9  | ABUTH Neuro Psychiatrics                         | Psychiatrics, Medicine | Independence Way, Kaduna State                               | Kaduna North | Kaduna |
| 2906 | KD/0009 | KD/0009/S/2  | ABUTH Neuro Psychiatrics                         | Psychiatrics, Medicine | Independence Way, Kaduna State                               | Kaduna North | Kaduna |
| 2907 | KD/0010 | KD/0010/S/14 | Giwa Hospital And Specialist Clinic              |                        | 2. Giwa Road Abakpa Kaduna                                   | Kaduna North | Kaduna |
| 2908 | KD/0010 | KD/0010/S/3  | Giwa Hospital And Specialist Clinic              |                        | 2. Giwa Road Abakpa Kaduna                                   | Kaduna North | Kaduna |
| 2909 | KD/0010 | KD/0010/S/4  | Giwa Hospital And Specialist Clinic              |                        | 2. Giwa Road Abakpa Kaduna                                   | Kaduna North | Kaduna |
| 2910 | KD/0010 | KD/0010/S/2  | Giwa Hospital And Specialist Clinic              |                        | 2. Giwa Road Abakpa Kaduna                                   | Kaduna North | Kaduna |
| 2911 | KD/0010 | KD/0010/S/5  | Giwa Hospital And Specialist Clinic              |                        | 2. Giwa Road Abakpa Kaduna                                   | Kaduna North | Kaduna |
| 2912 | KD/0010 | KD/0010/S/1  | Giwa Hospital And Specialist Clinic              |                        | 2. Giwa Road Abakpa Kaduna                                   | Kaduna North | Kaduna |
| 2913 | KD/0010 | KD/0010/S/6  | Giwa Hospital And Specialist Clinic              |                        | 2. Giwa Road Abakpa Kaduna                                   | Kaduna North | Kaduna |
| 2914 | KD/0010 | KD/0010/S/7  | Giwa Hospital And Specialist Clinic              |                        | 2. Giwa Road Abakpa Kaduna                                   | Kaduna North | Kaduna |
| 2915 | KD/0010 | KD/0010/S/8  | Giwa Hospital And Specialist Clinic              |                        | 2. Giwa Road Abakpa Kaduna                                   | Kaduna North | Kaduna |
| 2916 | KD/0012 | KD/0012/S/15 | Alba Clinic & Medical Centre                     |                        | 25, Constitution Road, Kaduna                                | Kaduna North | Kaduna |
| 2917 | KD/0012 | KD/0012/S/12 | Alba Clinic & Medical Centre                     |                        | 25, Constitution Road, Kaduna                                | Kaduna North | Kaduna |
| 2918 | KD/0012 | KD/0012/S/7  | Alba Clinic & Medical Centre                     |                        | 25, Constitution Road, Kaduna                                | Kaduna North | Kaduna |
| 2919 | KD/0012 | KD/0012/S/1  | Alba Clinic & Medical Centre                     |                        | 25, Constitution Road, Kaduna                                | Kaduna North | Kaduna |
| 2920 | KD/0012 | KD/0012/S/6  | Alba Clinic & Medical Centre                     |                        | 25, Constitution Road, Kaduna                                | Kaduna North | Kaduna |
| 2921 | KD/0012 | KD/0012/S/5  | Alba Clinic & Medical Centre                     |                        | 25, Constitution Road, Kaduna                                | Kaduna North | Kaduna |
| 2922 | KD/0012 | KD/0012/S/14 | Alba Clinic & Medical Centre                     |                        | 25, Constitution Road, Kaduna                                | Kaduna North | Kaduna |
| 2923 | KD/0012 | KD/0012/S/3  | Alba Clinic & Medical Centre                     |                        | 25, Constitution Road, Kaduna                                | Kaduna North | Kaduna |
| 2924 | KD/0013 | KD/0013/S/5  | Sefa Specialist Hospital                         |                        | 3, College Road, Kaduna                                      | Kaduna North | Kaduna |
| 2925 | KD/0013 | KD/0013/S/6  | Sefa Specialist Hospital                         |                        | 3, College Road, Kaduna                                      | Kaduna North | Kaduna |
| 2926 | KD/0013 | KD/0013/S/1  | Sefa Specialist Hospital                         |                        | 3, College Road, Kaduna                                      | Kaduna North | Kaduna |
| 2927 | KD/0013 | KD/0013/S/2  | Sefa Specialist Hospital                         |                        | 3, College Road, Kaduna                                      | Kaduna North | Kaduna |
| 2928 | KD/0013 | KD/0013/S/3  | Sefa Specialist Hospital                         |                        | 3, College Road, Kaduna                                      | Kaduna North | Kaduna |
| 2929 | KD/0014 | KD/0014/S/6  | Covenant Hospital & Maternity                    |                        | Au 6, Benin Street Kaduna.                                   | Kaduna North | Kaduna |
| 2930 | KD/0014 | KD/0014/S/3  | Covenant Hospital & Maternity                    |                        | Au 6, Benin Street Kaduna.                                   | Kaduna North | Kaduna |
| 2931 | KD/0014 | KD/0014/S/5  | Covenant Hospital & Maternity                    |                        | Au 6, Benin Street Kaduna.                                   | Kaduna North | Kaduna |
| 2932 | KD/0015 | KD/0015/S/3  | Belmont Specialist Hospital                      |                        | S.S. 5 Nasarawa Road, Kaduna                                 | Kaduna North | Kaduna |
| 2933 | KD/0015 | KD/0015/S/5  | Belmont Specialist Hospital                      |                        | S.S. 5 Nasarawa Road, Kaduna                                 | Kaduna North | Kaduna |
| 2934 | KD/0015 | KD/0015/S/6  | Belmont Specialist Hospital                      |                        | S.S. 5 Nasarawa Road, Kaduna                                 | Kaduna North | Kaduna |
| 2935 | KD/0016 | KD/0016/S/1  | Jowako Hospital                                  |                        | F 15 Jos Road, Kaduna                                        | Kaduna North | Kaduna |
| 2936 | KD/0016 | KD/0016/S/5  | Jowako Hospital                                  |                        | F 15 Jos Road, Kaduna                                        | Kaduna North | Kaduna |
| 2937 | KD/0016 | KD/0016/S/3  | Jowako Hospital                                  |                        | F 15 Jos Road, Kaduna                                        | Kaduna North | Kaduna |
| 2938 | KD/0016 | KD/0016/S/2  | Jowako Hospital                                  |                        | F 15 Jos Road, Kaduna                                        | Kaduna North | Kaduna |
| 2939 | KD/0017 | KD/0017/S/3  | Kagoro Sheshan Clinic                            | -                      | Bb11 & 12 Nupe Road, Kaduna                                  | Kaduna North | Kaduna |
| 2940 | KD/0017 | KD/0017/S/1  | Kagoro Sheshan Clinic                            | -                      | Bb11 & 12 Nupe Road, Kaduna                                  | Kaduna North | Kaduna |
| 2941 | KD/0018 | KD/0018/S/3  | Chasel Hospital                                  |                        | 15, Isa Kaita Road, Kaduna                                   | Kaduna North | Kaduna |
| 2942 | KD/0018 | KD/0018/S/8  | Chasel Hospital                                  |                        | 15, Isa Kaita Road, Kaduna                                   | Kaduna North | Kaduna |
| 2943 | KD/0018 | KD/0018/S/2  | Chasel Hospital                                  |                        | 15, Isa Kaita Road, Kaduna                                   | Kaduna North | Kaduna |

|      |         |              |                                       |                |                                                              |              |        |
|------|---------|--------------|---------------------------------------|----------------|--------------------------------------------------------------|--------------|--------|
| 2944 | KD/0018 | KD/0018/S/1  | Chasel Hospital                       |                | 15, Isa Kaita Road, Kaduna                                   | Kaduna North | Kaduna |
| 2945 | KD/0019 | KD/0019/S/2  | Garkuwa Specialist Hospital           |                | 1a Sultan Road, Off Isa Kaita Road, Kaduna                   | Kaduna North | Kaduna |
| 2946 | KD/0019 | KD/0019/S/1  | Garkuwa Specialist Hospital           |                | 1a Sultan Road, Off Isa Kaita Road, Kaduna                   | Kaduna North | Kaduna |
| 2947 | KD/0019 | KD/0019/S/3  | Garkuwa Specialist Hospital           |                | 1a Sultan Road, Off Isa Kaita Road, Kaduna                   | Kaduna North | Kaduna |
| 2948 | KD/0019 | KD/0019/S/15 | Garkuwa Specialist Hospital           |                | 1a Sultan Road, Off Isa Kaita Road, Kaduna                   | Kaduna North | Kaduna |
| 2949 | KD/0019 | KD/0019/S/6  | Garkuwa Specialist Hospital           |                | 1a Sultan Road, Off Isa Kaita Road, Kaduna                   | Kaduna North | Kaduna |
| 2950 | KD/0019 | KD/0019/S/5  | Garkuwa Specialist Hospital           |                | 1a Sultan Road, Off Isa Kaita Road, Kaduna                   | Kaduna North | Kaduna |
| 2951 | KD/0019 | KD/0019/S/4  | Garkuwa Specialist Hospital           |                | 1a Sultan Road, Off Isa Kaita Road, Kaduna                   | Kaduna North | Kaduna |
| 2952 | KD/0019 | KD/0019/S/12 | Garkuwa Specialist Hospital           |                | 1a Sultan Road, Off Isa Kaita Road, Kaduna                   | Kaduna North | Kaduna |
| 2953 | KD/0019 | KD/0019/S/8  | Garkuwa Specialist Hospital           |                | 1a Sultan Road, Off Isa Kaita Road, Kaduna                   | Kaduna North | Kaduna |
| 2954 | KD/0020 | KD/0020/S/1  | Iyali Hospital & Maternity            |                | 7, Kagoro Close, Off Gwari Crescent, Ungwar Rimi Gra, Kaduna | Kaduna North | Kaduna |
| 2955 | KD/0020 | KD/0020/S/2  | Iyali Hospital & Maternity            |                | 7, Kagoro Close, Off Gwari Crescent, Ungwar Rimi Gra, Kaduna | Kaduna North | Kaduna |
| 2956 | KD/0020 | KD/0020/S/3  | Iyali Hospital & Maternity            |                | 7, Kagoro Close, Off Gwari Crescent, Ungwar Rimi Gra, Kaduna | Kaduna North | Kaduna |
| 2957 | KD/0020 | KD/0020/S/5  | Iyali Hospital & Maternity            |                | 7, Kagoro Close, Off Gwari Crescent, Ungwar Rimi Gra, Kaduna | Kaduna North | Kaduna |
| 2958 | KD/0021 | KD/0021/S/15 | Rimi Clinics & Maternity Nig. Ltd.    |                | 24, Kubaka Road, Off Ja Abdulkadir Road, Ungwan Rimi, Kaduna | Kaduna North | Kaduna |
| 2959 | KD/0021 | KD/0021/S/6  | Rimi Clinics & Maternity Nig. Ltd.    |                | 24, Kubaka Road, Off Ja Abdulkadir Road, Ungwan Rimi, Kaduna | Kaduna North | Kaduna |
| 2960 | KD/0021 | KD/0021/S/1  | Rimi Clinics & Maternity Nig. Ltd.    |                | 24, Kubaka Road, Off Ja Abdulkadir Road, Ungwan Rimi, Kaduna | Kaduna North | Kaduna |
| 2961 | KD/0021 | KD/0021/S/3  | Rimi Clinics & Maternity Nig. Ltd.    |                | 24, Kubaka Road, Off Ja Abdulkadir Road, Ungwan Rimi, Kaduna | Kaduna North | Kaduna |
| 2962 | KD/0026 | KD/0026/S/3  | Eagle Hospital, Kaduna                |                | No. 3, Kujama Street/Gwari Road, Sao tasha, kaduna           | Kaduna North | Kaduna |
| 2963 | KD/0028 | KD/0028/S/5  | Barau Dikko Teaching Hospital, Kaduna |                | Barau Dikko Teaching Hospital, Kaduna                        | Kaduna North | Kaduna |
| 2964 | KD/0028 | KD/0028/S/4  | Barau Dikko Teaching Hospital, Kaduna |                | Barau Dikko Teaching Hospital, Kaduna                        | Kaduna North | Kaduna |
| 2965 | KD/0028 | KD/0028/S/3  | Barau Dikko Teaching Hospital, Kaduna |                | Barau Dikko Teaching Hospital, Kaduna                        | Kaduna North | Kaduna |
| 2966 | KD/0028 | KD/0028/S/11 | Barau Dikko Teaching Hospital, Kaduna |                | Barau Dikko Teaching Hospital, Kaduna                        | Kaduna North | Kaduna |
| 2967 | KD/0028 | KD/0028/S/10 | Barau Dikko Teaching Hospital, Kaduna |                | Barau Dikko Teaching Hospital, Kaduna                        | Kaduna North | Kaduna |
| 2968 | KD/0028 | KD/0028/S/13 | Barau Dikko Teaching Hospital, Kaduna |                | Barau Dikko Teaching Hospital, Kaduna                        | Kaduna North | Kaduna |
| 2969 | KD/0028 | KD/0028/S/6  | Barau Dikko Teaching Hospital, Kaduna |                | Barau Dikko Teaching Hospital, Kaduna                        | Kaduna North | Kaduna |
| 2970 | KD/0028 | KD/0028/S/2  | Barau Dikko Teaching Hospital, Kaduna |                | Barau Dikko Teaching Hospital, Kaduna                        | Kaduna North | Kaduna |
| 2971 | KD/0028 | KD/0028/S/7  | Barau Dikko Teaching Hospital, Kaduna |                | Barau Dikko Teaching Hospital, Kaduna                        | Kaduna North | Kaduna |
| 2972 | KD/0029 | KD/0029/S/3  | Jinya Specialist Hospital             |                | 7, Bida Road Kaduna                                          | Kaduna North | Kaduna |
| 2973 | KD/0029 | KD/0029/S/2  | Jinya Specialist Hospital             |                | 7, Bida Road Kaduna                                          | Kaduna North | Kaduna |
| 2974 | KD/0029 | KD/0029/S/1  | Jinya Specialist Hospital             |                | 7, Bida Road Kaduna                                          | Kaduna North | Kaduna |
| 2975 | KD/0029 | KD/0029/S/7  | Jinya Specialist Hospital             |                | 7, Bida Road Kaduna                                          | Kaduna North | Kaduna |
| 2976 | KD/0029 | KD/0029/S/6  | Jinya Specialist Hospital             |                | 7, Bida Road Kaduna                                          | Kaduna North | Kaduna |
| 2977 | KD/0030 | KD/0030/S/2  | Kabala Hospital                       |                | F 1a Market Road, Kaduna                                     | Kaduna North | Kaduna |
| 2978 | KD/0031 | KD/0031/S/15 | Guiness Eye Hospital(ABUTH)           | Ophthalmology, | Tafawa Balewa Way Kaduna                                     | Kaduna North | Kaduna |
| 2979 | KD/0033 | KD/0033/S/4  | Lemu Pharmacy Ltd.,                   | Pharmacy       | CA, 17, School Road, U/Rimi, Kaduna                          | Kaduna North | Kaduna |

|      |         |              |                                                     |                        |                                                                              |                   |        |
|------|---------|--------------|-----------------------------------------------------|------------------------|------------------------------------------------------------------------------|-------------------|--------|
| 2980 | KD/0035 | KD/0035/S/4  | Pacenel Int. Pharm. & Stores Ltd.,                  | Pharmacy               | Suite 3, Shopping Complex, Kashim Ibrahim, Yakubu Avenue Kad.                | Kaduna North      | Kaduna |
| 2981 | KD/0036 | KD/0036/S/4  | Ishara Pharmaceuticals Ltd.,                        | Pharmacy               | Shop 53, Safaha Shopping Complex, Kaduna                                     | Kaduna North      | Kaduna |
| 2982 | KD/0037 | KD/0037/S/4  | Osbud-K Pharmacy                                    | Pharmacy               | Kaduna Club Cornershop, Muh'd Buhari Way, Off Hamdala Hotel, Kaduna.         | Kaduna North      | Kaduna |
| 2983 | KD/0038 | KD/0038/S/4  | Rhemedic Pharmacy                                   | Pharmacy               | 40 Isa Kaita Road, Kaduna                                                    | Kaduna North      | Kaduna |
| 2984 | KD/0039 | KD/0039/S/4  | Gold Standard Pharmacy & Stores                     | Pharmacy               | C1 A1 Shehu Laminu Road, U/Rimi Kaduna                                       | Kaduna North      | Kaduna |
| 2985 | KD/0040 | KD/0040/S/4  | Aban Pharmacy                                       | Pharmacy               | Opp. ABU Hospital, Main Gate, Kaduna                                         | Kaduna North      | Kaduna |
| 2986 | KD/0041 | KD/0041/S/4  | Jagsil Pharmacy & Stores                            | Pharmacy               | 128 College Road, U/Dosa, Kaduna                                             | Kaduna North      | Kaduna |
| 2987 | KD/0042 | KD/0042/S/5  | Echo Scan Services Ltd.,                            | Laboratory             | 4, Katsina Road, Kaduna                                                      | Kaduna North      | Kaduna |
| 2988 | KD/0043 | KD/0043/S/5  | Diamond Diagnostic Care Lab                         | Laboratory             | 2nd Floor, 14 Abubakar Kigo/Constitution Road, Kaduna                        | Kaduna North      | Kaduna |
| 2989 | KD/0047 | KD/0047/S/1  | Etomie Oral and Maxillofacial Surgery Spe. Hospital | Maxillo-Facial Surgery | 6, Shehu Ibrahim Close, Malalid North East Extension.                        | Kaduna North      | Kaduna |
| 2990 | KD/0048 | KD/0048/S/5  | Jenicare Pharmacy                                   | Pharmacy               | Shop No. 9 Image Plaza, No.2, Blk B Zaria/Jolly Tanko Road, Barnawa, Kaduna. | Ibadan South West | Oyo    |
| 2991 | KD/0049 | KD/0049/S/4  | Samen Pharmacy Ltd.                                 | Pharmacy               | No H3, Waff Road, Adjacent, Command Guest House, Kaduna.                     | Kaduna North      | Kaduna |
| 2992 | KD/0053 | KD/0053/S/15 | Arewa Eye Centre                                    | Ophthalmology          | XX 3 Daura Road, Kaduna                                                      | Kaduna North      | Kaduna |
| 2993 | KD/0060 | KD/0060/S/19 | Habbat Skin Clinic & Med. Centre                    | Dermatology            | No. 10 Shehu Laminu Road, U/Rimi, Kaduna                                     | Kaduna North      | Kaduna |
| 2994 | KD/0061 | KD/0061/S/12 | National Ear Centre                                 | ENT                    | No. 20 Katuru Road, (Yusuf Dantoho Hospital) Kaduna                          | Kaduna South      | Kaduna |
| 2995 | KD/0062 | KD/0062/S/11 | J. Adams Physiotherapy & Medical Fitness Centre     | Pysiotherapy           | 5B, Zaki Road, Abakpa GRA, Kaduna                                            | Kaduna North      | Kaduna |
| 2996 | KD/0064 | KD/0064/S/8  | The Dental Surgery                                  | Dental                 | 7, Wurno Road, GRA, Kaduna                                                   | Kaduna North      | Kaduna |
| 2997 | KD/0065 | KD/0065/S/15 | Thelish Eye Centre                                  | Ophthalmology          | 5, Ali Akilu Road, Kaduna                                                    | Kaduna North      | Kaduna |
| 2998 | KD/0066 | KD/0066/S/4  | Aslad Pharmacy Ltd.,                                | Pharmacy               | AY 158 Ibrahim Taiwo Road, Kaduna                                            | Kaduna North      | Kaduna |
| 2999 | KD/0067 | KD/0067/S/4  | Lafian Jiki Pharmacy & Stores Ltd.                  | Pharmacy               | Warri Street/Kano Road, Kaduna                                               | Kaduna North      | Kaduna |
| 3000 | KD/0068 | KD/0068/S/4  | Oris Pharmacy                                       | Pharmacy               | W10 Zaira Road, Kaduna                                                       | Kaduna North      | Kaduna |
| 3001 | KD/0069 | KD/0069/S/4  | Enbokay Pharmacy & General Layout                   | Pharmacy               | Suites 1 & 2, Block B, Constitution Road, Kaduna                             | Kaduna North      | Kaduna |
| 3002 | KD/0070 | KD/0070/S/4  | Karama Pharmacy & Chemical Co. Ltd.                 | Pharmacy               | 10, Independence Way, (Recreation Club) Kaduna                               | Kaduna North      | Kaduna |
| 3003 | KD/0071 | KD/0071/S/4  | Ishara Pharmaceuticals Ltd.,                        | Pharmacy               | 1, Mohammed Buhari Way, Shopping Complex, Kaduna                             | Kaduna North      | Kaduna |
| 3004 | KD/0072 | KD/0072/S/4  | Faliko Pharmacy Ltd.,                               | Pharmacy               | Shop 12 Mohammed Buhari Way, Shopping Complex, Kaduna                        | Kaduna North      | Kaduna |
| 3005 | KD/0074 | KD/0074/S/2  | C-Jay Medical Centre                                | Internal Medicine      | Kaduna, Kaduna State                                                         | Kaduna South      | Kaduna |
| 3006 | KD/0076 | KD/0076/S/6  | Salamatu Hospital & Maternity                       |                        | 2, Bimin Yero Road, Off Kabala West, Road, Kaduna                            | Kaduna South      | Kaduna |
| 3007 | KD/0076 | KD/0076/S/5  | Salamatu Hospital & Maternity                       |                        | 2, Bimin Yero Road, Off Kabala West, Road, Kaduna                            | Kaduna South      | Kaduna |
| 3008 | KD/0076 | KD/0076/S/3  | Salamatu Hospital & Maternity                       |                        | 2, Bimin Yero Road, Off Kabala West, Road, Kaduna                            | Kaduna South      | Kaduna |
| 3009 | KD/0078 | KD/0078/S/5  | Fountain Hospital & Maternity                       | -                      | Ap 13 Community Bank Road, Prp Bus Stop/Gamagira, Tudun Wada                 | Kaduna South      | Kaduna |
| 3010 | KD/0078 | KD/0078/S/3  | Fountain Hospital & Maternity                       | -                      | Ap 13 Community Bank Road, Prp Bus Stop/Gamagira, Tudun Wada                 | Kaduna South      | Kaduna |
| 3011 | KD/0080 | KD/0080/S/8  | Shehu Kangiwa Medical Centre                        | -                      | (Sick Bay), Kaduna Polytechnic, T/Wada Kaduna                                | Kaduna South      | Kaduna |
| 3012 | KD/0080 | KD/0080/S/4  | Shehu Kangiwa Medical Centre                        | -                      | (Sick Bay), Kaduna Polytechnic, T/Wada Kaduna                                | Kaduna South      | Kaduna |

|      |         |              |                                    |   |                                                              |              |        |
|------|---------|--------------|------------------------------------|---|--------------------------------------------------------------|--------------|--------|
| 3013 | KD/0080 | KD/0080/S/5  | Shehu Kangiwa Medical Centre       | - | (Sick Bay), Kaduna Polytechnic, T/Wada Kaduna                | Kaduna South | Kaduna |
| 3014 | KD/0080 | KD/0080/S/3  | Shehu Kangiwa Medical Centre       | - | (Sick Bay), Kaduna Polytechnic, T/Wada Kaduna                | Kaduna South | Kaduna |
| 3015 | KD/0080 | KD/0080/S/11 | Shehu Kangiwa Medical Centre       | - | (Sick Bay), Kaduna Polytechnic, T/Wada Kaduna                | Kaduna South | Kaduna |
| 3016 | KD/0081 | KD/0081/S/2  | Yusuf Dantsoho Hospital            |   | T/Wada, Kaduna                                               | Kaduna South | Kaduna |
| 3017 | KD/0081 | KD/0081/S/3  | Yusuf Dantsoho Hospital            |   | T/Wada, Kaduna                                               | Kaduna South | Kaduna |
| 3018 | KD/0081 | KD/0081/S/7  | Yusuf Dantsoho Hospital            |   | T/Wada, Kaduna                                               | Kaduna South | Kaduna |
| 3019 | KD/0081 | KD/0081/S/4  | Yusuf Dantsoho Hospital            |   | T/Wada, Kaduna                                               | Kaduna South | Kaduna |
| 3020 | KD/0081 | KD/0081/S/8  | Yusuf Dantsoho Hospital            |   | T/Wada, Kaduna                                               | Kaduna South | Kaduna |
| 3021 | KD/0081 | KD/0081/S/5  | Yusuf Dantsoho Hospital            |   | T/Wada, Kaduna                                               | Kaduna South | Kaduna |
| 3022 | KD/0081 | KD/0081/S/6  | Yusuf Dantsoho Hospital            |   | T/Wada, Kaduna                                               | Kaduna South | Kaduna |
| 3023 | KD/0081 | KD/0081/S/1  | Yusuf Dantsoho Hospital            |   | T/Wada, Kaduna                                               | Kaduna South | Kaduna |
| 3024 | KD/0082 | KD/0082/S/3  | Maneks Hospital Ltd.               |   | A1 Block 5, Makera Road, Kakuri Kaduna                       | Kaduna South | Kaduna |
| 3025 | KD/0082 | KD/0082/S/10 | Maneks Hospital Ltd.               |   | A1 Block 5, Makera Road, Kakuri Kaduna                       | Kaduna South | Kaduna |
| 3026 | KD/0082 | KD/0082/S/1  | Maneks Hospital Ltd.               |   | A1 Block 5, Makera Road, Kakuri Kaduna                       | Kaduna South | Kaduna |
| 3027 | KD/0082 | KD/0082/S/8  | Maneks Hospital Ltd.               |   | A1 Block 5, Makera Road, Kakuri Kaduna                       | Kaduna South | Kaduna |
| 3028 | KD/0082 | KD/0082/S/6  | Maneks Hospital Ltd.               |   | A1 Block 5, Makera Road, Kakuri Kaduna                       | Kaduna South | Kaduna |
| 3029 | KD/0082 | KD/0082/S/15 | Maneks Hospital Ltd.               |   | A1 Block 5, Makera Road, Kakuri Kaduna                       | Kaduna South | Kaduna |
| 3030 | KD/0082 | KD/0082/S/2  | Maneks Hospital Ltd.               |   | A1 Block 5, Makera Road, Kakuri Kaduna                       | Kaduna South | Kaduna |
| 3031 | KD/0083 | KD/0083/S/1  | Amina Hospital Ltd.                |   | Gwari Avenue, Kachia Road, Kaduna                            | Kaduna South | Kaduna |
| 3032 | KD/0083 | KD/0083/S/6  | Amina Hospital Ltd.                |   | Gwari Avenue, Kachia Road, Kaduna                            | Kaduna South | Kaduna |
| 3033 | KD/0083 | KD/0083/S/2  | Amina Hospital Ltd.                |   | Gwari Avenue, Kachia Road, Kaduna                            | Kaduna South | Kaduna |
| 3034 | KD/0083 | KD/0083/S/3  | Amina Hospital Ltd.                |   | Gwari Avenue, Kachia Road, Kaduna                            | Kaduna South | Kaduna |
| 3035 | KD/0084 | KD/0084/S/5  | Ishaku Hospital                    |   | Gwari Avenue, Kachia Road, Kaduna                            | Kaduna South | Kaduna |
| 3036 | KD/0084 | KD/0084/S/3  | Ishaku Hospital                    |   | Gwari Avenue, Kachia Road, Kaduna                            | Kaduna South | Kaduna |
| 3037 | KD/0084 | KD/0084/S/1  | Ishaku Hospital                    |   | Gwari Avenue, Kachia Road, Kaduna                            | Kaduna South | Kaduna |
| 3038 | KD/0085 | KD/0085/S/5  | Giltoe Aris Specialist Hospital    |   | 17/19 Maiduwa Road, Near Barnawa Market, Kaduna              | Kaduna South | Kaduna |
| 3039 | KD/0085 | KD/0085/S/3  | Giltoe Aris Specialist Hospital    |   | 17/19 Maiduwa Road, Near Barnawa Market, Kaduna              | Kaduna South | Kaduna |
| 3040 | KD/0086 | KD/0086/S/2  | C Jay Medical Centre               |   | Near Dambo Int'l College, No 13, Kubani Crescent, Barnawa Kd | Kaduna South | Kaduna |
| 3041 | KD/0087 | KD/0087/S/8  | Gwamna Awan Hospital               |   | Nasarawa, Kaduna                                             | Kaduna South | Kaduna |
| 3042 | KD/0087 | KD/0087/S/7  | Gwamna Awan Hospital               |   | Nasarawa, Kaduna                                             | Kaduna South | Kaduna |
| 3043 | KD/0087 | KD/0087/S/4  | Gwamna Awan Hospital               |   | Nasarawa, Kaduna                                             | Kaduna South | Kaduna |
| 3044 | KD/0087 | KD/0087/S/3  | Gwamna Awan Hospital               |   | Nasarawa, Kaduna                                             | Kaduna South | Kaduna |
| 3045 | KD/0087 | KD/0087/S/1  | Gwamna Awan Hospital               |   | Nasarawa, Kaduna                                             | Kaduna South | Kaduna |
| 3046 | KD/0087 | KD/0087/S/5  | Gwamna Awan Hospital               |   | Nasarawa, Kaduna                                             | Kaduna South | Kaduna |
| 3047 | KD/0089 | KD/0089/S/7  | 44 Armed Forces Reference Hospital |   | Kaduna                                                       | Kaduna South | Kaduna |
| 3048 | KD/0089 | KD/0089/S/11 | 44 Armed Forces Reference Hospital |   | Kaduna                                                       | Kaduna South | Kaduna |
| 3049 | KD/0089 | KD/0089/S/6  | 44 Armed Forces Reference Hospital |   | Kaduna                                                       | Kaduna South | Kaduna |
| 3050 | KD/0089 | KD/0089/S/12 | 44 Armed Forces Reference Hospital |   | Kaduna                                                       | Kaduna South | Kaduna |
| 3051 | KD/0089 | KD/0089/S/2  | 44 Armed Forces Reference Hospital |   | Kaduna                                                       | Kaduna South | Kaduna |
| 3052 | KD/0089 | KD/0089/S/3  | 44 Armed Forces Reference Hospital |   | Kaduna                                                       | Kaduna South | Kaduna |
| 3053 | KD/0089 | KD/0089/S/1  | 44 Armed Forces Reference Hospital |   | Kaduna                                                       | Kaduna South | Kaduna |



|      |         |              |                                    |                                                               |                                                          |              |        |
|------|---------|--------------|------------------------------------|---------------------------------------------------------------|----------------------------------------------------------|--------------|--------|
| 3054 | KD/0090 | KD/0090/S/5  | Federal Neuropsychiatric Hospital  | Psychiatry, Laboratory, Pharmacy                              | Barnawa, Kaduna                                          | Kaduna South | Kaduna |
| 3055 | KD/0090 | KD/0090/S/9  | Federal Neuropsychiatric Hospital  | Psychiatry, Laboratory, Pharmacy                              | Barnawa, Kaduna                                          | Kaduna South | Kaduna |
| 3056 | KD/0090 | KD/0090/S/4  | Federal Neuropsychiatric Hospital  | Psychiatry, Laboratory, Pharmacy                              | Barnawa, Kaduna                                          | Kaduna South | Kaduna |
| 3057 | KD/0091 | KD/0091/S/4  | Ghali Pharmacy                     | Pharmacy                                                      | Kinsasha Road, U/Rimi, Kaduna                            | Kaduna North | Kaduna |
| 3058 | KD/0092 | KD/0092/S/4  | Godiya Pharmacy Co., Ltd.          | Pharmacy                                                      | 58/59, Lemu Road, T/Nupawa                               | Kaduna South | Kaduna |
| 3059 | KD/0093 | KD/0093/S/4  | Osbud-K Pharmacy                   | Pharmacy                                                      | 50, Lemu Road, Beside T/wada, Gen. Hospital, Kaduna      | Kaduna South | Kaduna |
| 3060 | KD/0094 | KD/0094/S/4  | Redox Pharmaceuticals              | Pharmacy                                                      | 98, Aliyu Makama Road, Barnawa, Kaduna                   | Kaduna South | Kaduna |
| 3061 | KD/0102 | KD/0102/S/15 | Premier Eye Hospital               | Ophthalmology                                                 | 3, Salama Close (Off. College Rd) Kaura Avenue, Kaduna   | Kaduna South | Kaduna |
| 3062 | KD/0105 | KD/0105/S/4  | Nukeka Pharmacy Ltd.               | Pharmacy                                                      | 6, Halima Road Ungwan Sunday, Sabo Kaduna                | Chikun       | Kaduna |
| 3063 | KD/0108 | KD/0108/S/4  | B & K Pharmacy Ltd.,               | Pharmacy                                                      | Algeria Rd., Opp. Barnawa Baptist Church, Barnawa Kaduna | Kaduna South | Kaduna |
| 3064 | KD/0109 | KD/0109/S/4  | Maneks Pharmacy & Stores Ltd.,     | Pharmacy                                                      | A1 Block 5 Makera, Kakuri Kaduna                         | Kaduna South | Kaduna |
| 3065 | KD/0110 | KD/0110/S/4  | Tada Pharmacy & Stores Ltd.,       | Pharmacy                                                      | BZ 172, Junction Road, Kaduna                            | Kaduna North | Kaduna |
| 3066 | KD/0112 | KD/0112/S/4  | Almadina Clinic                    |                                                               | No. 28 Queen Elizabeth Road, Gra Zairia                  | Sabon Gari   | Kaduna |
| 3067 | KD/0112 | KD/0112/S/3  | Almadina Clinic                    |                                                               | No. 28 Queen Elizabeth Road, Gra Zairia                  | Sabon Gari   | Kaduna |
| 3068 | KD/0112 | KD/0112/S/13 | Almadina Clinic                    |                                                               | No. 28 Queen Elizabeth Road, Gra Zairia                  | Sabon Gari   | Kaduna |
| 3069 | KD/0112 | KD/0112/S/1  | Almadina Clinic                    |                                                               | No. 28 Queen Elizabeth Road, Gra Zairia                  | Sabon Gari   | Kaduna |
| 3070 | KD/0112 | KD/0112/S/2  | Almadina Clinic                    |                                                               | No. 28 Queen Elizabeth Road, Gra Zairia                  | Sabon Gari   | Kaduna |
| 3071 | KD/0112 | KD/0112/S/6  | Almadina Clinic                    |                                                               | No. 28 Queen Elizabeth Road, Gra Zairia                  | Sabon Gari   | Kaduna |
| 3072 | KD/0113 | KD/0113/S/2  | Ladiya Hospital                    |                                                               | 64, Benin Street, Zaira                                  | Sabon Gari   | Kaduna |
| 3073 | KD/0113 | KD/0113/S/3  | Ladiya Hospital                    |                                                               | 64, Benin Street, Zaira                                  | Sabon Gari   | Kaduna |
| 3074 | KD/0115 | KD/0115/S/4  | Bayin Pharmacy & Stores Nig. Ltd.  | Pharmacy                                                      | No. 28 Queen Elizabeth Road, GRA Zaira, Kaduna           | Sabon Gari   | Kaduna |
| 3075 | KD/0119 | KD/0119/S/15 | University Health Service          | Ophthalmology, Internal Medicine, Dental Pharmacy, Laboratory | ABU Zaira, Kaduna                                        | Sabon Gari   | Kaduna |
| 3076 | KD/0119 | KD/0119/S/8  | University Health Service          | Ophthalmology, Internal Medicine, Dental Pharmacy, Laboratory | ABU Zaira, Kaduna                                        | Sabon Gari   | Kaduna |
| 3077 | KD/0119 | KD/0119/S/4  | University Health Service          | Ophthalmology, Internal Medicine, Dental Pharmacy, Laboratory | ABU Zaira, Kaduna                                        | Sabon Gari   | Kaduna |
| 3078 | KD/0119 | KD/0119/S/2  | University Health Service          | Ophthalmology, Internal Medicine, Dental Pharmacy, Laboratory | ABU Zaira, Kaduna                                        | Sabon Gari   | Kaduna |
| 3079 | KD/0119 | KD/0119/S/5  | University Health Service          | Ophthalmology, Internal Medicine, Dental Pharmacy, Laboratory | ABU Zaira, Kaduna                                        | Sabon Gari   | Kaduna |
| 3080 | KD/0122 | KD/0122/S/4  | Ijabah Pharmacy Nig., Ltd.         | Pharmacy                                                      | No. K. 14, Old Jos Road, Tudun Wada, Zaira Kaduna        | Kaduna South | Kaduna |
| 3081 | KD/0123 | KD/0123/S/2  | Salama Infirmary Hosp. & Maternity |                                                               | Sokoto Road, Kwangla, Zaira                              | Zaria        | Kaduna |
| 3082 | KD/0123 | KD/0123/S/5  | Salama Infirmary Hosp. & Maternity |                                                               | Sokoto Road, Kwangla, Zaira                              | Zaria        | Kaduna |
| 3083 | KD/0124 | KD/0124/S/5  | St. Luke's Anglican Hospital       |                                                               | Wusasa Zaira                                             | Zaria        | Kaduna |
| 3084 | KD/0124 | KD/0124/S/4  | St. Luke's Anglican Hospital       |                                                               | Wusasa Zaira                                             | Zaria        | Kaduna |
| 3085 | KD/0124 | KD/0124/S/1  | St. Luke's Anglican Hospital       |                                                               | Wusasa Zaira                                             | Zaria        | Kaduna |

|      |         |              |                                                        |                                    |                                                        |              |        |
|------|---------|--------------|--------------------------------------------------------|------------------------------------|--------------------------------------------------------|--------------|--------|
| 3086 | KD/0124 | KD/0124/S/3  | St. Luke's Anglican Hospital                           |                                    | Wusasa Zaira                                           | Zaria        | Kaduna |
| 3087 | KD/0126 | KD/0126/S/2  | Hajia Gambo Sawaba Gen. Hospital                       |                                    | Kofar-Gayan, Zaria                                     | Zaria        | Kaduna |
| 3088 | KD/0126 | KD/0126/S/3  | Hajia Gambo Sawaba Gen. Hospital                       |                                    | Kofar-Gayan, Zaria                                     | Zaria        | Kaduna |
| 3089 | KD/0126 | KD/0126/S/1  | Hajia Gambo Sawaba Gen. Hospital                       |                                    | Kofar-Gayan, Zaria                                     | Zaria        | Kaduna |
| 3090 | KD/0126 | KD/0126/S/5  | Hajia Gambo Sawaba Gen. Hospital                       |                                    | Kofar-Gayan, Zaria                                     | Zaria        | Kaduna |
| 3091 | KD/0133 | KD/0133/S/4  | Giljane Pharmacy                                       | Pharmacy                           | 21 D, Tafawa Balewa Way, ABUTH Shopping Complex Kaduna | Kaduna North | Kaduna |
| 3092 | KD/0134 | KD/0134/S/4  | Woskab Pharmacy                                        | Pharmacy                           | 2A, Alkali Road, By Scoa Motors, Kaduna                | Kaduna North | Kaduna |
| 3093 | KD/0135 | KD/0135/S/5  | Euro Hospital                                          | O&G, Surgery, Pharmacy, Laboratory | Kaduna                                                 | Kaduna North | Kaduna |
| 3094 | KD/0135 | KD/0135/S/1  | Euro Hospital                                          | O&G, Surgery, Pharmacy, Laboratory | Kaduna                                                 | Kaduna North | Kaduna |
| 3095 | KD/0135 | KD/0135/S/4  | Euro Hospital                                          | O&G, Surgery, Pharmacy, Laboratory | Kaduna                                                 | Kaduna North | Kaduna |
| 3096 | KD/0135 | KD/0135/S/3  | Euro Hospital                                          | O&G, Surgery, Pharmacy, Laboratory | Kaduna                                                 | Kaduna North | Kaduna |
| 3097 | KD/0136 | KD/0136/S/4  | El-Mouktar Pharm.                                      | Pharmacy                           | No 1, Sultan Bello Road, Ungwan Sarki, Kaduna          | Kaduna North | Kaduna |
| 3098 | KD/0143 | KD/0143/S/8  | Topaz Dental Clinic                                    | Dental                             | Safaha Complex, No. 6, Ibrahim Zaki Rd. U/Rimi Kaduna  | Kaduna North | Kaduna |
| 3099 | KD/0153 | KD/0153/S/12 | Nigerian Defence Academy                               |                                    | Kawo, Kaduna                                           | Kaduna North | Kaduna |
| 3100 | KD/0153 | KD/0153/S/4  | Nigerian Defence Academy                               |                                    | Kawo, Kaduna                                           | Kaduna North | Kaduna |
| 3101 | KD/0153 | KD/0153/S/5  | Nigerian Defence Academy                               |                                    | Kawo, Kaduna                                           | Kaduna North | Kaduna |
| 3102 | KD/0157 | KD/0157/S/2  | National Eye Centre                                    |                                    | Mando Road, Off Nnamdi Azikiwe Way, Kaduna             | Igabi        | Kaduna |
| 3103 | KD/0157 | KD/0157/S/5  | National Eye Centre                                    |                                    | Mando Road, Off Nnamdi Azikiwe Way, Kaduna             | Igabi        | Kaduna |
| 3104 | KD/0157 | KD/0157/S/15 | National Eye Centre                                    |                                    | Mando Road, Off Nnamdi Azikiwe Way, Kaduna             | Igabi        | Kaduna |
| 3105 | KD/0157 | KD/0157/S/12 | National Eye Centre                                    |                                    | Mando Road, Off Nnamdi Azikiwe Way, Kaduna             | Igabi        | Kaduna |
| 3106 | KD/0157 | KD/0157/S/7  | National Eye Centre                                    |                                    | Mando Road, Off Nnamdi Azikiwe Way, Kaduna             | Igabi        | Kaduna |
| 3107 | KD/0157 | KD/0157/S/4  | National Eye Centre                                    |                                    | Mando Road, Off Nnamdi Azikiwe Way, Kaduna             | Igabi        | Kaduna |
| 3108 | KD/0160 | KD/0160/S/5  | General Hospital, Giwa                                 |                                    | Giwa, Kaduna State                                     | Giwa         | Kaduna |
| 3109 | KD/0160 | KD/0160/S/2  | General Hospital, Giwa                                 |                                    | Giwa, Kaduna State                                     | Giwa         | Kaduna |
| 3110 | KD/0160 | KD/0160/S/1  | General Hospital, Giwa                                 |                                    | Giwa, Kaduna State                                     | Giwa         | Kaduna |
| 3111 | KD/0160 | KD/0160/S/3  | General Hospital, Giwa                                 |                                    | Giwa, Kaduna State                                     | Giwa         | Kaduna |
| 3112 | KD/0162 | KD/0162/S/1  | St Patrick Ibrahim Yakowa Memorial Hospital, Kafanchan |                                    | Kafanchan, Kaduna State.                               | Jema'a       | Kaduna |
| 3113 | KD/0162 | KD/0162/S/2  | St Patrick Ibrahim Yakowa Memorial Hospital, Kafanchan |                                    | Kafanchan, Kaduna State.                               | Jema'a       | Kaduna |
| 3114 | KD/0162 | KD/0162/S/6  | St Patrick Ibrahim Yakowa Memorial Hospital, Kafanchan |                                    | Kafanchan, Kaduna State.                               | Jema'a       | Kaduna |
| 3115 | KD/0162 | KD/0162/S/7  | St Patrick Ibrahim Yakowa Memorial Hospital, Kafanchan |                                    | Kafanchan, Kaduna State.                               | Jema'a       | Kaduna |
| 3116 | KD/0162 | KD/0162/S/4  | St Patrick Ibrahim Yakowa Memorial Hospital, Kafanchan |                                    | Kafanchan, Kaduna State.                               | Jema'a       | Kaduna |
| 3117 | KD/0162 | KD/0162/S/5  | St Patrick Ibrahim Yakowa Memorial Hospital, Kafanchan |                                    | Kafanchan, Kaduna State.                               | Jema'a       | Kaduna |
| 3118 | KD/0162 | KD/0162/S/3  | St Patrick Ibrahim Yakowa Memorial Hospital, Kafanchan |                                    | Kafanchan, Kaduna State.                               | Jema'a       | Kaduna |
| 3119 | KD/0163 | KD/0163/S/6  | Savannah Poly Clinic                                   |                                    | Samaru, Zaria.                                         | Zaria        | Kaduna |

|      |         |              |                                                     |                  |                                                                    |              |        |
|------|---------|--------------|-----------------------------------------------------|------------------|--------------------------------------------------------------------|--------------|--------|
| 3120 | KD/0163 | KD/0163/S/2  | Savannah Poly Clinic                                |                  | Samaru, Zaria.                                                     | Zaria        | Kaduna |
| 3121 | KD/0163 | KD/0163/S/1  | Savannah Poly Clinic                                |                  | Samaru, Zaria.                                                     | Zaria        | Kaduna |
| 3122 | KD/0168 | KD/0168/S/5  | Maneks Medical Laboratory Ltd.                      | Laboratory       | A1 Block 5, Makera Road, Kakuri, Kaduna                            | Kaduna South | Kaduna |
| 3123 | KD/0169 | KD/0169/S/7  | Maneks Medical Diagnostic Centre Ltd.               | Radiology        | A1 Block 5, Makera Road, Kakuri, Kaduna                            | Kaduna South | Kaduna |
| 3124 | KD/0170 | KD/0170/S/2  | Mends Specialist Hospital & Aviation Medical Centre |                  | 5, Abba Kyari Close, Ungwan Rimi GRA, Kaduna                       | Kaduna North | Kaduna |
| 3125 | KD/0170 | KD/0170/S/11 | Mends Specialist Hospital & Aviation Medical Centre |                  | 5, Abba Kyari Close, Ungwan Rimi GRA, Kaduna                       | Kaduna North | Kaduna |
| 3126 | KD/0170 | KD/0170/S/5  | Mends Specialist Hospital & Aviation Medical Centre |                  | 5, Abba Kyari Close, Ungwan Rimi GRA, Kaduna                       | Kaduna North | Kaduna |
| 3127 | KD/0170 | KD/0170/S/10 | Mends Specialist Hospital & Aviation Medical Centre |                  | 5, Abba Kyari Close, Ungwan Rimi GRA, Kaduna                       | Kaduna North | Kaduna |
| 3128 | KD/0170 | KD/0170/S/3  | Mends Specialist Hospital & Aviation Medical Centre |                  | 5, Abba Kyari Close, Ungwan Rimi GRA, Kaduna                       | Kaduna North | Kaduna |
| 3129 | KD/0170 | KD/0170/S/7  | Mends Specialist Hospital & Aviation Medical Centre |                  | 5, Abba Kyari Close, Ungwan Rimi GRA, Kaduna                       | Kaduna North | Kaduna |
| 3130 | KD/0170 | KD/0170/S/15 | Mends Specialist Hospital & Aviation Medical Centre |                  | 5, Abba Kyari Close, Ungwan Rimi GRA, Kaduna                       | Kaduna North | Kaduna |
| 3131 | KD/0170 | KD/0170/S/1  | Mends Specialist Hospital & Aviation Medical Centre |                  | 5, Abba Kyari Close, Ungwan Rimi GRA, Kaduna                       | Kaduna North | Kaduna |
| 3132 | KD/0179 | KD/0179/S/4  | Farimed Pharmacy & Stores Ltd                       | Pharmacy         | Mobil Filling Station Shopping Complex, 5 Independence Way, Kaduna | Kaduna North | Kaduna |
| 3133 | KD/0181 | KD/0181/S/4  | Y-Fab Pharmacy                                      | Pharmacy         | Art & Culture Shopping Complex, 30 Waff Rd., Kaduna, Kaduna State  | Kaduna North | Kaduna |
| 3134 | KD/0182 | KD/0182/S/6  | Abi Clinics & Hospital                              |                  | BZ 104 Ogori Road, Sardauna Crescent, Kaduna                       | Kaduna North | Kaduna |
| 3135 | KD/0187 | KD/0187/S/3  | Monarch Specialist Hospital                         |                  | N/k 12, Arochukwu Road, Kaduna                                     | Kaduna North | Kaduna |
| 3136 | KD/0188 | KD/0188/S/4  | Dana Clinic                                         | Primary Provider | Old Airport Road, Mando, Kaduna                                    | Igabi        | Kaduna |
| 3137 | KD/0189 | KD/0189/S/5  | Prime Specialist Hospital                           | Primary Provider | Az 16 Bakori Road, Kaduna                                          | Kaduna North | Kaduna |
| 3138 | KD/0189 | KD/0189/S/6  | Prime Specialist Hospital                           | Primary Provider | Az 16 Bakori Road, Kaduna                                          | Kaduna North | Kaduna |
| 3139 | KD/0189 | KD/0189/S/3  | Prime Specialist Hospital                           | Primary Provider | Az 16 Bakori Road, Kaduna                                          | Kaduna North | Kaduna |
| 3140 | KD/0189 | KD/0189/S/1  | Prime Specialist Hospital                           | Primary Provider | Az 16 Bakori Road, Kaduna                                          | Kaduna North | Kaduna |
| 3141 | KD/0190 | KD/0190/S/3  | Anna-Kitch Medical Centre                           | Primary Provider | 15, Wusasa Road, Zaria                                             | Zaria        | Kaduna |
| 3142 | KD/0190 | KD/0190/S/1  | Anna-Kitch Medical Centre                           | Primary Provider | 15, Wusasa Road, Zaria                                             | Zaria        | Kaduna |
| 3143 | KD/0190 | KD/0190/S/5  | Anna-Kitch Medical Centre                           | Primary Provider | 15, Wusasa Road, Zaria                                             | Zaria        | Kaduna |
| 3144 | KD/0193 | KD/0193/S/2  | Multi Clinic Nig. Ltd.                              | Primary Provider | 26A Yahaya Road, Unguwa Rimi G.R.A., Kaduna                        | Kaduna North | Kaduna |
| 3145 | KD/0193 | KD/0193/S/1  | Multi Clinic Nig. Ltd.                              | Primary Provider | 26A Yahaya Road, Unguwa Rimi G.R.A., Kaduna                        | Kaduna North | Kaduna |
| 3146 | KD/0193 | KD/0193/S/3  | Multi Clinic Nig. Ltd.                              | Primary Provider | 26A Yahaya Road, Unguwa Rimi G.R.A., Kaduna                        | Kaduna North | Kaduna |
| 3147 | KD/0193 | KD/0193/S/15 | Multi Clinic Nig. Ltd.                              | Primary Provider | 26A Yahaya Road, Unguwa Rimi G.R.A., Kaduna                        | Kaduna North | Kaduna |
| 3148 | KD/0193 | KD/0193/S/6  | Multi Clinic Nig. Ltd.                              | Primary Provider | 26A Yahaya Road, Unguwa Rimi G.R.A., Kaduna                        | Kaduna North | Kaduna |
| 3149 | KD/0193 | KD/0193/S/5  | Multi Clinic Nig. Ltd.                              | Primary Provider | 26A Yahaya Road, Unguwa Rimi G.R.A., Kaduna                        | Kaduna North | Kaduna |
| 3150 | KD/0195 | KD/0195/S/5  | Oxford Hospital                                     |                  | 38, Airforce Road, Samaru RD, Makera, Kaduna                       | Kaduna South | Kaduna |
| 3151 | KD/0195 | KD/0195/S/6  | Oxford Hospital                                     |                  | 38, Airforce Road, Samaru RD, Makera, Kaduna                       | Kaduna South | Kaduna |
| 3152 | KD/0195 | KD/0195/S/2  | Oxford Hospital                                     |                  | 38, Airforce Road, Samaru RD, Makera, Kaduna                       | Kaduna South | Kaduna |
| 3153 | KD/0195 | KD/0195/S/1  | Oxford Hospital                                     |                  | 38, Airforce Road, Samaru RD, Makera, Kaduna                       | Kaduna South | Kaduna |

|      |         |              |                                                                 |                             |                                                                 |              |        |
|------|---------|--------------|-----------------------------------------------------------------|-----------------------------|-----------------------------------------------------------------|--------------|--------|
| 3154 | KD/0197 | KD/0197/S/2  | Hitaf Specialist                                                |                             | D% Garbajar Abdulkadir Rd,<br>Off Rimi drive, U/Rimi,<br>Kaduna | Kaduna North | Kaduna |
| 3155 | KD/0200 | KD/0200/S/2  | St Gerard Catholic<br>Hospital                                  |                             | Kakuri Kaduna                                                   | Kaduna South | Kaduna |
| 3156 | KD/0200 | KD/0200/S/11 | St Gerard Catholic<br>Hospital                                  |                             | Kakuri Kaduna                                                   | Kaduna South | Kaduna |
| 3157 | KD/0200 | KD/0200/S/5  | St Gerard Catholic<br>Hospital                                  |                             | Kakuri Kaduna                                                   | Kaduna South | Kaduna |
| 3158 | KD/0200 | KD/0200/S/7  | St Gerard Catholic<br>Hospital                                  |                             | Kakuri Kaduna                                                   | Kaduna South | Kaduna |
| 3159 | KD/0200 | KD/0200/S/4  | St Gerard Catholic<br>Hospital                                  |                             | Kakuri Kaduna                                                   | Kaduna South | Kaduna |
| 3160 | KD/0200 | KD/0200/S/6  | St Gerard Catholic<br>Hospital                                  |                             | Kakuri Kaduna                                                   | Kaduna South | Kaduna |
| 3161 | KD/0200 | KD/0200/S/10 | St Gerard Catholic<br>Hospital                                  |                             | Kakuri Kaduna                                                   | Kaduna South | Kaduna |
| 3162 | KD/0200 | KD/0200/S/1  | St Gerard Catholic<br>Hospital                                  |                             | Kakuri Kaduna                                                   | Kaduna South | Kaduna |
| 3163 | KD/0200 | KD/0200/S/3  | St Gerard Catholic<br>Hospital                                  |                             | Kakuri Kaduna                                                   | Kaduna South | Kaduna |
| 3164 | KD/0201 | KD/0201/S/5  | National Teachers<br>Institute Staff Clinic                     |                             | Km 5 Kaduna-Zaria<br>Expressway, Kaduna                         | Igabi        | Kaduna |
| 3165 | KD/0203 | KD/0203/S/8  | Patriot Dental Clinic                                           | Dental                      | 4B, Katsina Road Kaduna                                         | Kaduna North | Kaduna |
| 3166 | KD/0208 | KD/0208/S/4  | Katari Pharmacy                                                 | Pharmacy                    | PP6 Warri Street By Ibrahim<br>Taiwo Kaduna                     | Kaduna South | Kaduna |
| 3167 | KD/0210 | KD/0210/S/4  | Nefe Pharmacy                                                   | Pharmacy                    | 3 Market Road Barnawa<br>Kaduna                                 | Kaduna South | Kaduna |
| 3168 | KD/0211 | KD/0211/S/14 | Medi-Scan Ltd                                                   | Radiology, X-<br>Ray,U-Scan | LL6 Ahmadu Bello Way<br>Kaduna                                  | Kaduna North | Kaduna |
| 3169 | KD/0211 | KD/0211/S/7  | Medi-Scan Ltd                                                   | Radiology, X-<br>Ray,U-Scan | LL6 Ahmadu Bello Way<br>Kaduna                                  | Kaduna North | Kaduna |
| 3170 | KD/0212 | KD/0212/S/4  | Gaba Pharmacy                                                   | Pharmacy                    | No. 20 Kataf Road Sabon<br>Tasha Kaduna                         | Chikun       | Kaduna |
| 3171 | KD/0215 | KD/0215/S/4  | Godek Pharmacy                                                  | Pharmacy                    | Z 5, Zaire Rd Barnawa<br>Shopping Complex                       | Kaduna South | Kaduna |
| 3172 | KD/0217 | KD/0217/S/13 | Niger Optical Services<br>(Nig) Ltd                             | Optometry                   | 20 Hospital Road Tuoun<br>Wada, Zaria                           | Zaria        | Kaduna |
| 3173 | KD/0218 | KD/0218/S/13 | Niger Optical Services<br>(Nig) Ltd                             | Optometry                   | NC 367 ,IBB Way Kaduna                                          | Kaduna North | Kaduna |
| 3174 | KD/0223 | KD/0223/S/7  | A B U Teaching<br>Hospital, Shika                               |                             | Shika, Zaria, Kaduna State                                      | Sabon Gari   | Kaduna |
| 3175 | KD/0223 | KD/0223/S/5  | A B U Teaching<br>Hospital, Shika                               |                             | Shika, Zaria, Kaduna State                                      | Sabon Gari   | Kaduna |
| 3176 | KD/0223 | KD/0223/S/4  | A B U Teaching<br>Hospital, Shika                               |                             | Shika, Zaria, Kaduna State                                      | Sabon Gari   | Kaduna |
| 3177 | KD/0223 | KD/0223/S/10 | A B U Teaching<br>Hospital, Shika                               |                             | Shika, Zaria, Kaduna State                                      | Sabon Gari   | Kaduna |
| 3178 | KD/0223 | KD/0223/S/12 | A B U Teaching<br>Hospital, Shika                               |                             | Shika, Zaria, Kaduna State                                      | Sabon Gari   | Kaduna |
| 3179 | KD/0223 | KD/0223/S/6  | A B U Teaching<br>Hospital, Shika                               |                             | Shika, Zaria, Kaduna State                                      | Sabon Gari   | Kaduna |
| 3180 | KD/0223 | KD/0223/S/2  | A B U Teaching<br>Hospital, Shika                               |                             | Shika, Zaria, Kaduna State                                      | Sabon Gari   | Kaduna |
| 3181 | KD/0223 | KD/0223/S/3  | A B U Teaching<br>Hospital, Shika                               |                             | Shika, Zaria, Kaduna State                                      | Sabon Gari   | Kaduna |
| 3182 | KD/0223 | KD/0223/S/1  | A B U Teaching<br>Hospital, Shika                               |                             | Shika, Zaria, Kaduna State                                      | Sabon Gari   | Kaduna |
| 3183 | KD/0223 | KD/0223/S/14 | A B U Teaching<br>Hospital, Shika                               |                             | Shika, Zaria, Kaduna State                                      | Sabon Gari   | Kaduna |
| 3184 | KD/0226 | KD/0226/S/5  | Biba Hospital                                                   |                             | AE 7, Matazu Close, off<br>Rigachukwu Road, T/Wada,<br>Kaduna   | Kaduna South | Kaduna |
| 3185 | KD/0230 | KD/0230/S/1  | Jibrin Mai-Gwari<br>Hospital                                    |                             | Birnin Gwari, Kaduna                                            | Birnin Gwari | Kaduna |
| 3186 | KD/0230 | KD/0230/S/2  | Jibrin Mai-Gwari<br>Hospital                                    |                             | Birnin Gwari, Kaduna                                            | Birnin Gwari | Kaduna |
| 3187 | KD/0230 | KD/0230/S/5  | Jibrin Mai-Gwari<br>Hospital                                    |                             | Birnin Gwari, Kaduna                                            | Birnin Gwari | Kaduna |
| 3188 | KD/0230 | KD/0230/S/3  | Jibrin Mai-Gwari<br>Hospital                                    |                             | Birnin Gwari, Kaduna                                            | Birnin Gwari | Kaduna |
| 3189 | KD/0231 | KD/0231/S/4  | National Board for<br>Tech. Education<br>(NBTE), Medical Centre |                             | Plot B Bida Road, Kaduna                                        | Kaduna North | Kaduna |
| 3190 | KD/0231 | KD/0231/S/5  | National Board for<br>Tech. Education<br>(NBTE), Medical Centre |                             | Plot B Bida Road, Kaduna                                        | Kaduna North | Kaduna |
| 3191 | KD/0239 | KD/0239/S/6  | Horeb Specialist<br>Hospital                                    |                             | 4 Force Road Maraba<br>Estate, Kaduna                           | Kaduna North | Kaduna |
| 3192 | KD/0244 | KD/0244/S/3  | Mayfair Clinic Nigeria<br>Ltd.                                  |                             | 8 Crescent Rd Sabon Gari,<br>Zaria                              | Zaria        | Kaduna |
| 3193 | KD/0252 | KD/0252/S/10 | Skills Specialist Clinic                                        |                             | No. 16 Kurmi Avenue,<br>Kabala Costain, Kaduna                  | Kaduna North | Kaduna |
| 3194 | KD/0253 | KD/0253/S/1  | Sovanel Orthopaedic<br>Clinic & Med. Clinic                     |                             | Abubakar Kigo Rd, New<br>Extension, Kaduna                      | Kaduna North | Kaduna |

|      |         |              |                                               |                |                                                                   |              |        |
|------|---------|--------------|-----------------------------------------------|----------------|-------------------------------------------------------------------|--------------|--------|
| 3195 | KD/0253 | KD/0253/S/10 | Sovanel Orthopaedic Clinic & Med. Clinic      |                | Abubakar Kigo Rd, New Extension, Kaduna                           | Kaduna North | Kaduna |
| 3196 | KD/0255 | KD/0255/S/5  | Biomedical Laboratory Services                | Laboratory     | 33F Obekpa Road, Off Independence Way, Kaduna                     | Kaduna North | Kaduna |
| 3197 | KD/0256 | KD/0256/S/5  | Dan-Musa X-ray Centre                         | Radiology      | No. 6 Dan-Musa/Yoruba Road, Ori-Apata, Kaduna                     | Kaduna North | Kaduna |
| 3198 | KD/0257 | KD/0257/S/4  | Dr. Gwamna Awan General Hospital              | Pharmacy       | Kakuri, Kaduna                                                    | Kaduna South | Kaduna |
| 3199 | KD/0258 | KD/0258/S/4  | Dunuya Pharmacy Ltd                           | Pharmacy       | KK2 Abijan Street, Kaduna                                         | Kaduna North | Kaduna |
| 3200 | KD/0259 | KD/0259/S/5  | E.E. Laboratories                             | Laboratory     | W. 7 Ahmadu Bello Way, Katsina Road Round-About, Kaduna           | Kaduna North | Kaduna |
| 3201 | KD/0260 | KD/0260/S/4  | GENS Pharmacy Ltd                             | Pharmacy       | A5 College Road, Kaduna                                           | Kaduna South | Kaduna |
| 3202 | KD/0261 | KD/0261/S/12 | Hi-Fi Consultant Clinic                       | ENT            | 2A Dalali Rd Malali Kaduna                                        | Kaduna North | Kaduna |
| 3203 | KD/0264 | KD/0264/S/4  | Ismus Pharmacy Ltd                            | Pharmacy       | B1/B2 Lafia Road, Kaduna                                          | Kaduna North | Kaduna |
| 3204 | KD/0266 | KD/0266/S/8  | Lloyd Dental Clinic                           | Dental         | Duniya House (Nasco Carpets), AM8 Abuja Road/Lagos Street, Kaduna | Kaduna North | Kaduna |
| 3205 | KD/0270 | KD/0270/S/4  | Nay-Day Pharmacy Ltd                          | Pharmacy       | 1 Waziri Ibrahim Crescent, Kaduna                                 | Kaduna North | Kaduna |
| 3206 | KD/0271 | KD/0271/S/8  | NDA Dental Clinic                             | Dental         | NDA, Kaduna                                                       | Kaduna North | Kaduna |
| 3207 | KD/0272 | KD/0272/S/4  | NDA Drug Revolving Scheme                     | Pharmacy       | NDA Medical Centre, Kaduna                                        | Kaduna North | Kaduna |
| 3208 | KD/0274 | KD/0274/S/4  | Osbud-K Pharmacy                              | Pharmacy       | KK 12 Yoruba Road, Kaduna                                         | Kaduna North | Kaduna |
| 3209 | KD/0275 | KD/0275/S/4  | Phoenix Pharmacy & Stores                     | Pharmacy       | No. 2 Zaria/Shagari Road, Narayi, Kaduna                          | Chikun       | Kaduna |
| 3210 | KD/0277 | KD/0277/S/4  | Somid Pharmacy Ltd                            | Pharmacy       | AV8 Benin/Kano Road, Kaduna                                       | Kaduna North | Kaduna |
| 3211 | KD/0278 | KD/0278/S/4  | Sufficient Pharmacy & Stores                  | Pharmacy       | No 23 Ribadu Road, Off Kofar Gamji, Kaduna                        | Kaduna North | Kaduna |
| 3212 | KD/0279 | KD/0279/S/7  | X-ray Ultrasound Scan Centre                  | Radiology      | XX3, Dauda Road, Kaduna                                           | Kaduna North | Kaduna |
| 3213 | KD/0280 | KD/0280/S/1  | Diamond Specialist Hospital                   |                | 4 MM Lawan Jaafaru Isa Road, GRA, Off Isa Kaita Road              | Kaduna North | Kaduna |
| 3214 | KD/0280 | KD/0280/S/5  | Diamond Specialist Hospital                   |                | 4 MM Lawan Jaafaru Isa Road, GRA, Off Isa Kaita Road              | Kaduna North | Kaduna |
| 3215 | KD/0280 | KD/0280/S/6  | Diamond Specialist Hospital                   |                | 4 MM Lawan Jaafaru Isa Road, GRA, Off Isa Kaita Road              | Kaduna North | Kaduna |
| 3216 | KD/0280 | KD/0280/S/3  | Diamond Specialist Hospital                   |                | 4 MM Lawan Jaafaru Isa Road, GRA, Off Isa Kaita Road              | Kaduna North | Kaduna |
| 3217 | KD/0280 | KD/0280/S/2  | Diamond Specialist Hospital                   |                | 4 MM Lawan Jaafaru Isa Road, GRA, Off Isa Kaita Road              | Kaduna North | Kaduna |
| 3218 | KD/0282 | KD/0282/S/15 | Chaha Eye Hospital & General Clinics          |                | 42B Jabi Road off Alkali Road GRA Kaduna                          | Kaduna North | Kaduna |
| 3219 | KD/0284 | KD/0284/S/5  | Zaria Clinic & Medical Centre                 |                | 16 Hospital Road T/Wada, Zaria                                    | Zaria        | Kaduna |
| 3220 | KD/0284 | KD/0284/S/7  | Zaria Clinic & Medical Centre                 |                | 16 Hospital Road T/Wada, Zaria                                    | Zaria        | Kaduna |
| 3221 | KD/0286 | KD/0286/S/14 | Jalva Radiological Diagnostic Centre          | USS, Radiology | Babadoko Shopping Complex, Zaria                                  | Zaria        | Kaduna |
| 3222 | KD/0286 | KD/0286/S/7  | Jalva Radiological Diagnostic Centre          | USS, Radiology | Babadoko Shopping Complex, Zaria                                  | Zaria        | Kaduna |
| 3223 | KD/0287 | KD/0287/S/13 | Loryb Eye Clinic                              | Optometry      | 9A Sokoto Road, Sabon Gari, Zaria                                 | Zaria        | Kaduna |
| 3224 | KD/0292 | KD/0292/S/5  | E.C. Frank Medical Centre Diagnostic Labs. AJ | Laboratory     | 29/31 Benin Street, Yoruba Road, Kaduna                           | Kaduna North | Kaduna |
| 3225 | KD/0294 | KD/0294/S/3  | Salvation Hospital & Maternity                |                | 2B Algbria Crescent, Barnawa, Kaduna                              | Kaduna South | Kaduna |
| 3226 | KD/0294 | KD/0294/S/2  | Salvation Hospital & Maternity                |                | 2B Algbria Crescent, Barnawa, Kaduna                              | Kaduna South | Kaduna |
| 3227 | KD/0295 | KD/0295/S/14 | Sa'a Scan Service                             | USS            | 10B Na-Magwatmatse Road, U/Rimi, Kaduna                           | Kaduna North | Kaduna |
| 3228 | KD/0296 | KD/0296/S/4  | Fomwan Hospital                               |                | 28 Musana Road, Malali, Kaduna                                    | Kaduna North | Kaduna |
| 3229 | KD/0296 | KD/0296/S/5  | Fomwan Hospital                               |                | 28 Musana Road, Malali, Kaduna                                    | Kaduna North | Kaduna |
| 3230 | KD/0298 | KD/0298/S/1  | Musaka Specialist Hospital                    |                | 10B Nagwamatse Road, U/Rimi, Kaduna                               | Kaduna North | Kaduna |
| 3231 | KD/0298 | KD/0298/S/5  | Musaka Specialist Hospital                    |                | 10B Nagwamatse Road, U/Rimi, Kaduna                               | Kaduna North | Kaduna |
| 3232 | KD/0301 | KD/0301/S/4  | Farmek Pharmacy Ltd                           | Pharmacy       | 80 Iya Road, Sabon Gari, Zaria                                    | Sabon Gari   | Kaduna |
| 3233 | KD/0302 | KD/0302/S/4  | Livseal Pharmacy                              | Pharmacy       | 63 Sokoto Road, Samaru, Zaria                                     | Sabon Gari   | Kaduna |
| 3234 | KD/0308 | KD/0308/S/1  | Albarka Hospital                              |                | BZ170, Offa Road by Sardauna Crescent, Kaduna                     | Kaduna North | Kaduna |

|      |         |              |                                      |                                                                                 |                                                          |              |        |
|------|---------|--------------|--------------------------------------|---------------------------------------------------------------------------------|----------------------------------------------------------|--------------|--------|
| 3235 | KD/0308 | KD/0308/S/3  | Albarka Hospital                     |                                                                                 | BZ170, Offa Road by Sardauna Crescent, Kaduna            | Kaduna North | Kaduna |
| 3236 | KD/0309 | KD/0309/S/1  | St Louis Hospital                    | Internal Medicine, Laboratory, Radiology, Pharmacy, Opthamology, General Surgey | Zonkwa Kaduna Road, Zangon Kataf                         | Zangon Kataf | Kaduna |
| 3237 | KD/0309 | KD/0309/S/15 | St Louis Hospital                    | Internal Medicine, Laboratory, Radiology, Pharmacy, Opthamology, General Surgey | Zonkwa Kaduna Road, Zangon Kataf                         | Zangon Kataf | Kaduna |
| 3238 | KD/0309 | KD/0309/S/4  | St Louis Hospital                    | Internal Medicine, Laboratory, Radiology, Pharmacy, Opthamology, General Surgey | Zonkwa Kaduna Road, Zangon Kataf                         | Zangon Kataf | Kaduna |
| 3239 | KD/0312 | KD/0312/S/5  | Monarch Medical Laboratory           |                                                                                 | NK 12 Arochukwu by Lokoja Road, Kaduna                   | Kaduna North | Kaduna |
| 3240 | KD/0313 | KD/0313/S/4  | Joniks Pharmacy & Store Ltd          | Pharmacy                                                                        | AL 17 Abuja Road, Kaduna                                 | Kaduna North | Kaduna |
| 3241 | KD/0319 | KD/0319/S/4  | Dabo Mohammed Lere Memorial Hospital |                                                                                 | Along Jos Road, Saminaka                                 | Lere         | Kaduna |
| 3242 | KD/0319 | KD/0319/S/5  | Dabo Mohammed Lere Memorial Hospital |                                                                                 | Along Jos Road, Saminaka                                 | Lere         | Kaduna |
| 3243 | KD/0319 | KD/0319/S/7  | Dabo Mohammed Lere Memorial Hospital |                                                                                 | Along Jos Road, Saminaka                                 | Lere         | Kaduna |
| 3244 | KD/0327 | KD/0327/S/2  | Muslim Specialist Hospital           |                                                                                 | Wusasa, Zaria                                            | Sabon Gari   | Kaduna |
| 3245 | KD/0327 | KD/0327/S/3  | Muslim Specialist Hospital           |                                                                                 | Wusasa, Zaria                                            | Sabon Gari   | Kaduna |
| 3246 | KD/0327 | KD/0327/S/1  | Muslim Specialist Hospital           |                                                                                 | Wusasa, Zaria                                            | Sabon Gari   | Kaduna |
| 3247 | KD/0330 | KD/0330/S/2  | Aloaye Clinic and Maternity          |                                                                                 | 4 Gaskiya Road, Zaria                                    | Zaria        | Kaduna |
| 3248 | KD/0333 | KD/0333/S/6  | Harmony Hospital                     |                                                                                 | 38 Nuhu Aliyu Crescent, Barnawa Layout, Kaduna           | Kaduna North | Kaduna |
| 3249 | KD/0333 | KD/0333/S/3  | Harmony Hospital                     |                                                                                 | 38 Nuhu Aliyu Crescent, Barnawa Layout, Kaduna           | Kaduna North | Kaduna |
| 3250 | KD/0333 | KD/0333/S/2  | Harmony Hospital                     |                                                                                 | 38 Nuhu Aliyu Crescent, Barnawa Layout, Kaduna           | Kaduna North | Kaduna |
| 3251 | KD/0333 | KD/0333/S/1  | Harmony Hospital                     |                                                                                 | 38 Nuhu Aliyu Crescent, Barnawa Layout, Kaduna           | Kaduna North | Kaduna |
| 3252 | KD/0333 | KD/0333/S/5  | Harmony Hospital                     |                                                                                 | 38 Nuhu Aliyu Crescent, Barnawa Layout, Kaduna           | Kaduna North | Kaduna |
| 3253 | KD/0333 | KD/0333/S/14 | Harmony Hospital                     |                                                                                 | 38 Nuhu Aliyu Crescent, Barnawa Layout, Kaduna           | Kaduna North | Kaduna |
| 3254 | KD/0339 | KD/0339/S/4  | Shubal Pharmacy                      |                                                                                 | D1/D2 Akali Road, near Muritala Square, GRA, Kaduna      | Kaduna North | Kaduna |
| 3255 | KD/0340 | KD/0340/S/14 | Crystal Clinic and Maternity         |                                                                                 | 6 Makera Road, Opp, Kaduna South LGA Secretariat, Kakuri | Kaduna South | Kaduna |
| 3256 | KD/0342 | KD/0342/S/3  | Dalof Special;ist Hospital Limitred  |                                                                                 | 136 Bayajida Roadf, Angwa Rimi, GRA Kaduna               | Kaduna North | Kaduna |
| 3257 | KD/0342 | KD/0342/S/4  | Dalof Special;ist Hospital Limitred  |                                                                                 | 136 Bayajida Roadf, Angwa Rimi, GRA Kaduna               | Kaduna North | Kaduna |
| 3258 | KD/0342 | KD/0342/S/5  | Dalof Special;ist Hospital Limitred  |                                                                                 | 136 Bayajida Roadf, Angwa Rimi, GRA Kaduna               | Kaduna North | Kaduna |
| 3259 | KD/0346 | KD/0346/S/8  | Dialogue Sepcialist Clinics Ltd.     |                                                                                 | #1, Kukan Road, U/Dosa, Kaduna                           | Kaduna North | Kaduna |
| 3260 | KD/0346 | KD/0346/S/1  | Dialogue Sepcialist Clinics Ltd.     |                                                                                 | #1, Kukan Road, U/Dosa, Kaduna                           | Kaduna North | Kaduna |
| 3261 | KD/0346 | KD/0346/S/4  | Dialogue Sepcialist Clinics Ltd.     |                                                                                 | #1, Kukan Road, U/Dosa, Kaduna                           | Kaduna North | Kaduna |
| 3262 | KD/0346 | KD/0346/S/6  | Dialogue Sepcialist Clinics Ltd.     |                                                                                 | #1, Kukan Road, U/Dosa, Kaduna                           | Kaduna North | Kaduna |
| 3263 | KD/0346 | KD/0346/S/15 | Dialogue Sepcialist Clinics Ltd.     |                                                                                 | #1, Kukan Road, U/Dosa, Kaduna                           | Kaduna North | Kaduna |
| 3264 | KD/0346 | KD/0346/S/3  | Dialogue Sepcialist Clinics Ltd.     |                                                                                 | #1, Kukan Road, U/Dosa, Kaduna                           | Kaduna North | Kaduna |
| 3265 | KD/0346 | KD/0346/S/12 | Dialogue Sepcialist Clinics Ltd.     |                                                                                 | #1, Kukan Road, U/Dosa, Kaduna                           | Kaduna North | Kaduna |
| 3266 | KD/0346 | KD/0346/S/2  | Dialogue Sepcialist Clinics Ltd.     |                                                                                 | #1, Kukan Road, U/Dosa, Kaduna                           | Kaduna North | Kaduna |
| 3267 | KD/0346 | KD/0346/S/5  | Dialogue Sepcialist Clinics Ltd.     |                                                                                 | #1, Kukan Road, U/Dosa, Kaduna                           | Kaduna North | Kaduna |
| 3268 | KD/0351 | KD/0351/S/2  | Terra Medical Center                 |                                                                                 | # 5, Alh nasiru Idi close, Hanwa new extension, Zaria    | Zaria        | Kaduna |

|      |         |              |                                                       |  |                                                                                   |              |        |
|------|---------|--------------|-------------------------------------------------------|--|-----------------------------------------------------------------------------------|--------------|--------|
| 3269 | KD/0361 | KD/0361/S/4  | Alba Clinics & Medical Centre Ltd                     |  | 25, Constitution Rd, Kaduna                                                       | Kaduna North | Kaduna |
| 3270 | KD/0361 | KD/0361/S/7  | Alba Clinics & Medical Centre Ltd                     |  | 25, Constitution Rd, Kaduna                                                       | Kaduna North | Kaduna |
| 3271 | KD/0362 | KD/0362/S/3  | Dan Giwa Memorial Hospital                            |  | By Noruin Guest House, Maraban Rido kaduna, Kaduna State                          | Kaduna South | Kaduna |
| 3272 | KD/0368 | KD/0368/S/4  | Jubril Maigwari Memorial Hospital                     |  | Birin Gwari, Kaduna, Kaduna State.                                                | Birnin Gwari | Kaduna |
| 3273 | KD/0372 | KD/0372/S/5  | Fisabil Hospital                                      |  | 22, NIMASA Road, off Katuru Road, From Rabah Road, Badarawa, Kaduna, Kaduna State | Kaduna North | Kaduna |
| 3274 | KD/0372 | KD/0372/S/7  | Fisabil Hospital                                      |  | 22, NIMASA Road, off Katuru Road, From Rabah Road, Badarawa, Kaduna, Kaduna State | Kaduna North | Kaduna |
| 3275 | KD/0374 | KD/0374/S/14 | Ahmadu Bello University Health Services (Main Campus) |  | Samaru Zaria, Kaduna State                                                        | Zaria        | Kaduna |
| 3276 | KD/0375 | KD/0375/S/5  | First Scan Diagnostic Services                        |  | 4 Alkakli Road Kaduna, Kaduna State                                               | Kaduna North | Kaduna |
| 3277 | KD/0375 | KD/0375/S/7  | First Scan Diagnostic Services                        |  | 4 Alkakli Road Kaduna, Kaduna State                                               | Kaduna North | Kaduna |
| 3278 | KD/0376 | KD/0376/S/3  | Pal Hospital, Zaria                                   |  | No. 15, River Road, GRA, Zaria, Kaduna State                                      | Sabon Gari   | Kaduna |
| 3279 | KD/0376 | KD/0376/S/4  | Pal Hospital, Zaria                                   |  | No. 15, River Road, GRA, Zaria, Kaduna State                                      | Sabon Gari   | Kaduna |
| 3280 | KD/0376 | KD/0376/S/5  | Pal Hospital, Zaria                                   |  | No. 15, River Road, GRA, Zaria, Kaduna State                                      | Sabon Gari   | Kaduna |
| 3281 | KD/0376 | KD/0376/S/7  | Pal Hospital, Zaria                                   |  | No. 15, River Road, GRA, Zaria, Kaduna State                                      | Sabon Gari   | Kaduna |
| 3282 | KD/0379 | KD/0379/S/3  | Belside Hospital                                      |  | No. 5 Kanta Road, Kaduna, Kaduna State                                            | Kaduna North | Kaduna |
| 3283 | KD/0380 | KD/0380/S/4  | Garden City Specialist Hospital                       |  | No.2 Sultan Road Ungwa Rimi, Kaduna State                                         | Kaduna South | Kaduna |
| 3284 | KD/0380 | KD/0380/S/3  | Garden City Specialist Hospital                       |  | No.2 Sultan Road Ungwa Rimi, Kaduna State                                         | Kaduna South | Kaduna |
| 3285 | KD/0380 | KD/0380/S/14 | Garden City Specialist Hospital                       |  | No.2 Sultan Road Ungwa Rimi, Kaduna State                                         | Kaduna South | Kaduna |
| 3286 | KD/0380 | KD/0380/S/5  | Garden City Specialist Hospital                       |  | No.2 Sultan Road Ungwa Rimi, Kaduna State                                         | Kaduna South | Kaduna |
| 3287 | KD/0381 | KD/0381/S/7  | Ahaz Medical & Diagnostic Services Ltd.               |  | 2A. Dala By Korau Road, Ungwa Rimi GRA Kaduna State                               | Kaduna North | Kaduna |
| 3288 | KD/0381 | KD/0381/S/5  | Ahaz Medical & Diagnostic Services Ltd.               |  | 2A. Dala By Korau Road, Ungwa Rimi GRA Kaduna State                               | Kaduna North | Kaduna |
| 3289 | KD/0385 | KD/0385/S/5  | DNA LABS                                              |  | Q5, Danja Road Off Katuru Road, Ungwa Sarki Kaduna State.                         | Kaduna North | Kaduna |
| 3290 | KD/0390 | KD/0390/S/8  | Pearl Dental Clinic                                   |  | 4, Isa Kaita Road, Kaduna State                                                   | Kaduna North | Kaduna |
| 3291 | KD/0391 | KD/0391/S/1  | NNPC Industrial Hospital Kaduna                       |  | Km 16, Kachia Road, NNPC Housing Estate Kaduna State                              | Kaduna South | Kaduna |
| 3292 | KD/0391 | KD/0391/S/7  | NNPC Industrial Hospital Kaduna                       |  | Km 16, Kachia Road, NNPC Housing Estate Kaduna State                              | Kaduna South | Kaduna |
| 3293 | KD/0391 | KD/0391/S/5  | NNPC Industrial Hospital Kaduna                       |  | Km 16, Kachia Road, NNPC Housing Estate Kaduna State                              | Kaduna South | Kaduna |
| 3294 | KD/0391 | KD/0391/S/3  | NNPC Industrial Hospital Kaduna                       |  | Km 16, Kachia Road, NNPC Housing Estate Kaduna State                              | Kaduna South | Kaduna |
| 3295 | KD/0391 | KD/0391/S/2  | NNPC Industrial Hospital Kaduna                       |  | Km 16, Kachia Road, NNPC Housing Estate Kaduna State                              | Kaduna South | Kaduna |
| 3296 | KD/0391 | KD/0391/S/6  | NNPC Industrial Hospital Kaduna                       |  | Km 16, Kachia Road, NNPC Housing Estate Kaduna State                              | Kaduna South | Kaduna |
| 3297 | KD/0393 | KD/0393/S/14 | University Health Services                            |  | Ahmadu Bello University Zaria, Kaduna State                                       | Zaria        | Kaduna |
| 3298 | KD/0393 | KD/0393/S/12 | University Health Services                            |  | Ahmadu Bello University Zaria, Kaduna State                                       | Zaria        | Kaduna |
| 3299 | KD/0393 | KD/0393/S/6  | University Health Services                            |  | Ahmadu Bello University Zaria, Kaduna State                                       | Zaria        | Kaduna |
| 3300 | KD/0393 | KD/0393/S/3  | University Health Services                            |  | Ahmadu Bello University Zaria, Kaduna State                                       | Zaria        | Kaduna |
| 3301 | KD/0395 | KD/0395/S/5  | Women's Health International                          |  | 52, Hanwa GRA Zaria, Kaduna State.                                                | Zaria        | Kaduna |
| 3302 | KD/0395 | KD/0395/S/3  | Women's Health International                          |  | 52, Hanwa GRA Zaria, Kaduna State.                                                | Zaria        | Kaduna |
| 3303 | KD/0395 | KD/0395/S/14 | Women's Health International                          |  | 52, Hanwa GRA Zaria, Kaduna State.                                                | Zaria        | Kaduna |
| 3304 | KD/0396 | KD/0396/S/10 | AP Smart Hospital                                     |  | Gwagwada Street, Trikania, Kaduna State.                                          | Kaduna South | Kaduna |

|      |         |              |                                                  |                                                                                      |                                                    |              |        |
|------|---------|--------------|--------------------------------------------------|--------------------------------------------------------------------------------------|----------------------------------------------------|--------------|--------|
| 3305 | KD/0398 | KD/0398/S/15 | Rakiya Memorial Eye & Specialist Hospitals       |                                                                                      | 1 Karau Road, Angwan Rimi GRA Kaduna, Kaduna State | Kaduna North | Kaduna |
| 3306 | KG/0001 | KG/0001/S/4  | ASCL Medical Centre, Ajaokuta                    |                                                                                      | Ajaokuta Steel Co. Ltd., Kogi State                | Ajaokuta     | Kogi   |
| 3307 | KG/0001 | KG/0001/S/5  | ASCL Medical Centre, Ajaokuta                    |                                                                                      | Ajaokuta Steel Co. Ltd., Kogi State                | Ajaokuta     | Kogi   |
| 3308 | KG/0001 | KG/0001/S/1  | ASCL Medical Centre, Ajaokuta                    |                                                                                      | Ajaokuta Steel Co. Ltd., Kogi State                | Ajaokuta     | Kogi   |
| 3309 | KG/0001 | KG/0001/S/6  | ASCL Medical Centre, Ajaokuta                    |                                                                                      | Ajaokuta Steel Co. Ltd., Kogi State                | Ajaokuta     | Kogi   |
| 3310 | KG/0001 | KG/0001/S/3  | ASCL Medical Centre, Ajaokuta                    |                                                                                      | Ajaokuta Steel Co. Ltd., Kogi State                | Ajaokuta     | Kogi   |
| 3311 | KG/0001 | KG/0001/S/2  | ASCL Medical Centre, Ajaokuta                    |                                                                                      | Ajaokuta Steel Co. Ltd., Kogi State                | Ajaokuta     | Kogi   |
| 3312 | KG/0004 | KG/0004/S/6  | Kogi State University Teaching Hospital, Anyigba | Obst, & Gynae. Peadiatrics, General Surgery, Internal Medicine, Pharmacy, Laboratory | Ayingba                                            | Dekina       | Kogi   |
| 3313 | KG/0004 | KG/0004/S/5  | Kogi State University Teaching Hospital, Anyigba | Obst, & Gynae. Peadiatrics, General Surgery, Internal Medicine, Pharmacy, Laboratory | Ayingba                                            | Dekina       | Kogi   |
| 3314 | KG/0004 | KG/0004/S/3  | Kogi State University Teaching Hospital, Anyigba | Obst, & Gynae. Peadiatrics, General Surgery, Internal Medicine, Pharmacy, Laboratory | Ayingba                                            | Dekina       | Kogi   |
| 3315 | KG/0004 | KG/0004/S/1  | Kogi State University Teaching Hospital, Anyigba | Obst, & Gynae. Peadiatrics, General Surgery, Internal Medicine, Pharmacy, Laboratory | Ayingba                                            | Dekina       | Kogi   |
| 3316 | KG/0004 | KG/0004/S/2  | Kogi State University Teaching Hospital, Anyigba | Obst, & Gynae. Peadiatrics, General Surgery, Internal Medicine, Pharmacy, Laboratory | Ayingba                                            | Dekina       | Kogi   |
| 3317 | KG/0004 | KG/0004/S/4  | Kogi State University Teaching Hospital, Anyigba | Obst, & Gynae. Peadiatrics, General Surgery, Internal Medicine, Pharmacy, Laboratory | Ayingba                                            | Dekina       | Kogi   |
| 3318 | KG/0005 | KG/0005/S/4  | General Hospital Dekina                          |                                                                                      | Dekina                                             | Dekina       | Kogi   |
| 3319 | KG/0005 | KG/0005/S/3  | General Hospital Dekina                          |                                                                                      | Dekina                                             | Dekina       | Kogi   |
| 3320 | KG/0005 | KG/0005/S/5  | General Hospital Dekina                          |                                                                                      | Dekina                                             | Dekina       | Kogi   |
| 3321 | KG/0005 | KG/0005/S/1  | General Hospital Dekina                          |                                                                                      | Dekina                                             | Dekina       | Kogi   |
| 3322 | KG/0005 | KG/0005/S/2  | General Hospital Dekina                          |                                                                                      | Dekina                                             | Dekina       | Kogi   |
| 3323 | KG/0009 | KG/0009/S/5  | General Hospital, Idah                           |                                                                                      | Idah                                               | Idah         | Kogi   |
| 3324 | KG/0009 | KG/0009/S/7  | General Hospital, Idah                           |                                                                                      | Idah                                               | Idah         | Kogi   |
| 3325 | KG/0009 | KG/0009/S/1  | General Hospital, Idah                           |                                                                                      | Idah                                               | Idah         | Kogi   |
| 3326 | KG/0009 | KG/0009/S/4  | General Hospital, Idah                           |                                                                                      | Idah                                               | Idah         | Kogi   |
| 3327 | KG/0009 | KG/0009/S/3  | General Hospital, Idah                           |                                                                                      | Idah                                               | Idah         | Kogi   |
| 3328 | KG/0009 | KG/0009/S/2  | General Hospital, Idah                           |                                                                                      | Idah                                               | Idah         | Kogi   |
| 3329 | KG/0009 | KG/0009/S/6  | General Hospital, Idah                           |                                                                                      | Idah                                               | Idah         | Kogi   |
| 3330 | KG/0012 | KG/0012/S/1  | Niger Hospital                                   |                                                                                      |                                                    | Lokoja       | Kogi   |
| 3331 | KG/0012 | KG/0012/S/6  | Niger Hospital                                   |                                                                                      |                                                    | Lokoja       | Kogi   |
| 3332 | KG/0012 | KG/0012/S/3  | Niger Hospital                                   |                                                                                      |                                                    | Lokoja       | Kogi   |



|      |         |             |                                    |                                                                 |                                                                    |            |      |
|------|---------|-------------|------------------------------------|-----------------------------------------------------------------|--------------------------------------------------------------------|------------|------|
| 3333 | KG/0012 | KG/0012/S/2 | Niger Hospital                     |                                                                 |                                                                    | Lokoja     | Kogi |
| 3334 | KG/0017 | KG/0017/S/2 | General Hospital,<br>Okene         |                                                                 | Okene                                                              | Okene      | Kogi |
| 3335 | KG/0017 | KG/0017/S/6 | General Hospital,<br>Okene         |                                                                 | Okene                                                              | Okene      | Kogi |
| 3336 | KG/0017 | KG/0017/S/3 | General Hospital,<br>Okene         |                                                                 | Okene                                                              | Okene      | Kogi |
| 3337 | KG/0017 | KG/0017/S/4 | General Hospital,<br>Okene         |                                                                 | Okene                                                              | Okene      | Kogi |
| 3338 | KG/0017 | KG/0017/S/5 | General Hospital,<br>Okene         |                                                                 | Okene                                                              | Okene      | Kogi |
| 3339 | KG/0017 | KG/0017/S/1 | General Hospital,<br>Okene         |                                                                 | Okene                                                              | Okene      | Kogi |
| 3340 | KG/0019 | KG/0019/S/3 | Ecwa Hospital                      |                                                                 | Mission Road Egbe                                                  | Yagba West | Kogi |
| 3341 | KG/0019 | KG/0019/S/6 | Ecwa Hospital                      |                                                                 | Mission Road Egbe                                                  | Yagba West | Kogi |
| 3342 | KG/0019 | KG/0019/S/1 | Ecwa Hospital                      |                                                                 | Mission Road Egbe                                                  | Yagba West | Kogi |
| 3343 | KG/0019 | KG/0019/S/2 | Ecwa Hospital                      |                                                                 | Mission Road Egbe                                                  | Yagba West | Kogi |
| 3344 | KG/0019 | KG/0019/S/4 | Ecwa Hospital                      |                                                                 | Mission Road Egbe                                                  | Yagba West | Kogi |
| 3345 | KG/0019 | KG/0019/S/5 | Ecwa Hospital                      |                                                                 | Mission Road Egbe                                                  | Yagba West | Kogi |
| 3346 | KG/0020 | KG/0020/S/5 | Federal Medical Center<br>Lokoja   |                                                                 | Lokoja                                                             | Lokoja     | Kogi |
| 3347 | KG/0020 | KG/0020/S/1 | Federal Medical Center<br>Lokoja   |                                                                 | Lokoja                                                             | Lokoja     | Kogi |
| 3348 | KG/0020 | KG/0020/S/3 | Federal Medical Center<br>Lokoja   |                                                                 | Lokoja                                                             | Lokoja     | Kogi |
| 3349 | KG/0020 | KG/0020/S/2 | Federal Medical Center<br>Lokoja   |                                                                 | Lokoja                                                             | Lokoja     | Kogi |
| 3350 | KG/0020 | KG/0020/S/4 | Federal Medical Center<br>Lokoja   |                                                                 | Lokoja                                                             | Lokoja     | Kogi |
| 3351 | KG/0020 | KG/0020/S/6 | Federal Medical Center<br>Lokoja   |                                                                 | Lokoja                                                             | Lokoja     | Kogi |
| 3352 | KG/0021 | KG/0021/S/6 | General Hospital,<br>Kabba         |                                                                 | Kabba                                                              | Kabba/Bunu | Kogi |
| 3353 | KG/0021 | KG/0021/S/5 | General Hospital,<br>Kabba         |                                                                 | Kabba                                                              | Kabba/Bunu | Kogi |
| 3354 | KG/0021 | KG/0021/S/3 | General Hospital,<br>Kabba         |                                                                 | Kabba                                                              | Kabba/Bunu | Kogi |
| 3355 | KG/0021 | KG/0021/S/2 | General Hospital,<br>Kabba         |                                                                 | Kabba                                                              | Kabba/Bunu | Kogi |
| 3356 | KG/0021 | KG/0021/S/1 | General Hospital,<br>Kabba         |                                                                 | Kabba                                                              | Kabba/Bunu | Kogi |
| 3357 | KG/0023 | KG/0023/S/2 | General Hospital,<br>Ankpa         |                                                                 | Ankpa                                                              | Ankpa      | Kogi |
| 3358 | KG/0023 | KG/0023/S/4 | General Hospital,<br>Ankpa         |                                                                 | Ankpa                                                              | Ankpa      | Kogi |
| 3359 | KG/0023 | KG/0023/S/5 | General Hospital,<br>Ankpa         |                                                                 | Ankpa                                                              | Ankpa      | Kogi |
| 3360 | KG/0023 | KG/0023/S/1 | General Hospital,<br>Ankpa         |                                                                 | Ankpa                                                              | Ankpa      | Kogi |
| 3361 | KG/0033 | KG/0033/S/5 | General Hospital,<br>Ayetoro Gbede |                                                                 | Ayetoro Gbede                                                      | Ijumu      | Kogi |
| 3362 | KG/0039 | KG/0039/S/2 | Omeza Ali                          | O & G,<br>Peadiatrics,<br>General Surgery,<br>Internal Medicine | Behind Mobil Petrol Station,<br>Off Old Kabba/Okene Rd.,<br>Lokoja | Lokoja     | Kogi |
| 3363 | KG/0039 | KG/0039/S/1 | Omeza Ali                          | O & G,<br>Peadiatrics,<br>General Surgery,<br>Internal Medicine | Behind Mobil Petrol Station,<br>Off Old Kabba/Okene Rd.,<br>Lokoja | Lokoja     | Kogi |
| 3364 | KG/0039 | KG/0039/S/6 | Omeza Ali                          | O & G,<br>Peadiatrics,<br>General Surgery,<br>Internal Medicine | Behind Mobil Petrol Station,<br>Off Old Kabba/Okene Rd.,<br>Lokoja | Lokoja     | Kogi |
| 3365 | KG/0039 | KG/0039/S/3 | Omeza Ali                          | O & G,<br>Peadiatrics,<br>General Surgery,<br>Internal Medicine | Behind Mobil Petrol Station,<br>Off Old Kabba/Okene Rd.,<br>Lokoja | Lokoja     | Kogi |
| 3366 | KG/0041 | KG/0041/S/4 | Suraj Pharmacy & Gen.<br>Ent. Ltd  | Pharmacy                                                        | 2 Ibrahim Aliyu Street G.R.A.<br>Lokoja                            | Lokoja     | Kogi |
| 3367 | KG/0042 | KG/0042/S/4 | Dave-Mercy Pharmacy                | Pharmacy                                                        | Salihu Ibrahim Rd., Lokoja                                         | Lokoja     | Kogi |
| 3368 | KG/0043 | KG/0043/S/4 | Saleez<br>Drugs/Pharmacy           | Pharmacy                                                        | 8. Hospital Rd., Okene                                             | Okene      | Kogi |
| 3369 | KG/0044 | KG/0044/S/4 | Broadway Pharmacy                  | Pharmacy                                                        | Osaro Way, Kabba                                                   | Kabba/Bunu | Kogi |
| 3370 | KG/0046 | KG/0046/S/3 | Federal College Of<br>Education    |                                                                 | Federal College Of<br>Education Okene                              | Okene      | Kogi |
| 3371 | KG/0047 | KG/0047/S/1 | Grimard Catholic<br>Hospital       |                                                                 | Grimard Catholic Hospital<br>Anyiagba                              | Dekina     | Kogi |
| 3372 | KG/0047 | KG/0047/S/6 | Grimard Catholic<br>Hospital       |                                                                 | Grimard Catholic Hospital<br>Anyiagba                              | Dekina     | Kogi |
| 3373 | KG/0047 | KG/0047/S/7 | Grimard Catholic<br>Hospital       |                                                                 | Grimard Catholic Hospital<br>Anyiagba                              | Dekina     | Kogi |

|      |         |              |                                                 |                                                                                             |                                                     |            |      |
|------|---------|--------------|-------------------------------------------------|---------------------------------------------------------------------------------------------|-----------------------------------------------------|------------|------|
| 3374 | KG/0047 | KG/0047/S/3  | Grimard Catholic Hospital                       |                                                                                             | Grimard Catholic Hospital Anyiagba                  | Dekina     | Kogi |
| 3375 | KG/0047 | KG/0047/S/2  | Grimard Catholic Hospital                       |                                                                                             | Grimard Catholic Hospital Anyiagba                  | Dekina     | Kogi |
| 3376 | KG/0047 | KG/0047/S/4  | Grimard Catholic Hospital                       |                                                                                             | Grimard Catholic Hospital Anyiagba                  | Dekina     | Kogi |
| 3377 | KG/0047 | KG/0047/S/5  | Grimard Catholic Hospital                       |                                                                                             | Grimard Catholic Hospital Anyiagba                  | Dekina     | Kogi |
| 3378 | KG/0052 | KG/0052/S/4  | Opeyemi Pharmacy                                | Pharmacy                                                                                    | No 52 Market Road Egbe                              | Yagba West | Kogi |
| 3379 | KG/0053 | KG/0053/S/4  | Yotan Pharmacy                                  | Pharmacy                                                                                    | No. 19 Lafia Street, Okene                          | Kabba/Bunu | Kogi |
| 3380 | KG/0058 | KG/0058/S/4  | Bonafide Pharmacy Ltd.                          | Pharmacy                                                                                    | No 19, IBB Way Almost Opp. Bank Of The North Lokoja | Lokoja     | Kogi |
| 3381 | KG/0059 | KG/0059/S/4  | Egbe Hospital                                   | Radiology, Laboratory                                                                       | Hospital Road Egbe Road                             | Yagba West | Kogi |
| 3382 | KG/0061 | KG/0061/S/5  | Federal Polytechnic Medical Centre              |                                                                                             | Idah - Ajaka Road, Kogi State                       | Idah       | Kogi |
| 3383 | KG/0061 | KG/0061/S/4  | Federal Polytechnic Medical Centre              |                                                                                             | Idah - Ajaka Road, Kogi State                       | Idah       | Kogi |
| 3384 | KG/0062 | KG/0062/S/4  | Fed. College of Education Medical Centre, Okene |                                                                                             | Okene, Kogi State                                   | Okene      | Kogi |
| 3385 | KG/0062 | KG/0062/S/5  | Fed. College of Education Medical Centre, Okene |                                                                                             | Okene, Kogi State                                   | Okene      | Kogi |
| 3386 | KG/0069 | KG/0069/S/3  | PACIFIC HOSPITAL                                | O&G                                                                                         | OYIFU LAYOUT                                        | Dekina     | Kogi |
| 3387 | KG/0070 | KG/0070/S/5  | SAUKI MEDICAL DIAGNOSTIC LAB.                   | Laboratory                                                                                  | 5, IDAKOYIBO STREET, OKENE                          | Okene      | Kogi |
| 3388 | KG/0074 | KG/0074/S/5  | Police Clinic                                   |                                                                                             | Police State Command, Lokoja                        | Lokoja     | Kogi |
| 3389 | KG/0082 | KG/0082/S/5  | Good Shepherd Medical Centre                    |                                                                                             | No 10, Egume /Ankpa Road, Anyigba, Kogi State.      | Dekina     | Kogi |
| 3390 | KG/0082 | KG/0082/S/4  | Good Shepherd Medical Centre                    |                                                                                             | No 10, Egume /Ankpa Road, Anyigba, Kogi State.      | Dekina     | Kogi |
| 3391 | KG/0083 | KG/0083/S/10 | Cross Nation Consultant Hospital                |                                                                                             | Phase 2, Behind Rewal House, Lokoja, Kogi State     | Lokoja     | Kogi |
| 3392 | KG/0084 | KG/0084/S/1  | Kogi State Specialist Hospital                  | Primary, Dental, ENT, Internal Medicine, O&G, Ophthalmology, Physiotherapy, General Surgery | Along Okene-Kabba Road                              | Lokoja     | Kogi |
| 3393 | KG/0084 | KG/0084/S/15 | Kogi State Specialist Hospital                  | Primary, Dental, ENT, Internal Medicine, O&G, Ophthalmology, Physiotherapy, General Surgery | Along Okene-Kabba Road                              | Lokoja     | Kogi |
| 3394 | KG/0084 | KG/0084/S/2  | Kogi State Specialist Hospital                  | Primary, Dental, ENT, Internal Medicine, O&G, Ophthalmology, Physiotherapy, General Surgery | Along Okene-Kabba Road                              | Lokoja     | Kogi |
| 3395 | KG/0084 | KG/0084/S/12 | Kogi State Specialist Hospital                  | Primary, Dental, ENT, Internal Medicine, O&G, Ophthalmology, Physiotherapy, General Surgery | Along Okene-Kabba Road                              | Lokoja     | Kogi |
| 3396 | KG/0084 | KG/0084/S/8  | Kogi State Specialist Hospital                  | Primary, Dental, ENT, Internal Medicine, O&G, Ophthalmology, Physiotherapy, General Surgery | Along Okene-Kabba Road                              | Lokoja     | Kogi |
| 3397 | KG/0084 | KG/0084/S/11 | Kogi State Specialist Hospital                  | Primary, Dental, ENT, Internal Medicine, O&G, Ophthalmology, Physiotherapy, General Surgery | Along Okene-Kabba Road                              | Lokoja     | Kogi |
| 3398 | KG/0084 | KG/0084/S/3  | Kogi State Specialist Hospital                  | Primary, Dental, ENT, Internal Medicine, O&G, Ophthalmology, Physiotherapy, General Surgery | Along Okene-Kabba Road                              | Lokoja     | Kogi |
| 3399 | KG/0087 | KG/0087/S/8  | Divine Dental Clinic                            |                                                                                             | Behind Equity Plaza (CAC Building)                  | Lokoja     | Kogi |
| 3400 | KG/0088 | KG/0088/S/4  | Bonafide Pharmacy Limited                       |                                                                                             | OPP. Bank of The North, Lokoja                      | Lokoja     | Kogi |
| 3401 | KG/0094 | KG/0094/S/4  | Shushan Pharmacy LTD                            |                                                                                             | 5, IBB Way, By FMC junction, Lokoja, Kogi Stat      | Lokoja     | Kogi |

|      |         |              |                                                        |                            |                                                                                      |                |        |
|------|---------|--------------|--------------------------------------------------------|----------------------------|--------------------------------------------------------------------------------------|----------------|--------|
| 3402 | KG/0096 | KG/0096/S/1  | Zenith Specialist Hospital                             |                            | Olunle Street, Near Army Signal, Lokoja, Kogi Stat                                   | Lokoja         | Kogi   |
| 3403 | KG/0101 | KG/0101/S/13 | Eyez Alive                                             |                            | Goshen Plaza, Opp. old living faith junction, lokongoma, phase 1, Lokoja, Kogi state | Lokoja         | Kogi   |
| 3404 | KG/0104 | KG/0104/S/3  | Hillcrest Clinic And Maternity                         |                            | Opposite Dunamis church, along Ganaja road, lokoja, Kogi state                       | Lokoja         | Kogi   |
| 3405 | KG/0106 | KG/0106/S/3  | Rehoboth Specialist Hospital                           |                            | 2nd gate, phase II, lokongoma, lokoja, Kogi state                                    | Lokoja         | Kogi   |
| 3406 | KG/0106 | KG/0106/S/6  | Rehoboth Specialist Hospital                           |                            | 2nd gate, phase II, lokongoma, lokoja, Kogi state                                    | Lokoja         | Kogi   |
| 3407 | KG/0107 | KG/0107/S/3  | Neighbour Multicare Hospital And Women Welfare         |                            | Omata street, Anyigba, Kogi state                                                    | Dekina         | Kogi   |
| 3408 | KG/0108 | KG/0108/S/3  | Neighbour Multicare Hospital And Women Welfare         |                            | Omata street, Anyigba, Kogi state                                                    | Dekina         | Kogi   |
| 3409 | KG/0110 | KG/0110/S/13 | Carewell Eye Clinic                                    |                            | No 6, Saliu Ibrahim street, lokoja, Kogi state                                       | Lokoja         | Kogi   |
| 3410 | KG/0111 | KG/0111/S/3  | Concord Hospital                                       |                            | 1st 200 unit estate, opposite total filling station, Gadumo, Lokoja, Kogi state      | Lokoja         | Kogi   |
| 3411 | KG/0112 | KG/0112/S/15 | MDR-Lighthouse Medical Eye and Specialist Laser Centre |                            | Government House Road, By Kogi Hotel Round About GRA Lokoja                          | Lokoja         | Kogi   |
| 3412 | KG/0113 | KG/0113/S/3  | Helping Hands Women Hospital                           |                            | Behind T-Square Hotel, Zone 8 Roundabout, Lokoja                                     | Lokoja         | Kogi   |
| 3413 | KN/0003 | KN/0003/S/3  | Sheikh Mohammed Jidda General Hospital                 | Medicine, O&G, Paediatrics | Sabon Gari Kano                                                                      | Sabon Gari     | Kaduna |
| 3414 | KN/0007 | KN/0007/S/6  | Hasiya Bayero Peadiatrics Hospital                     | Paediatrics, Pharmacy      | Kano City                                                                            | Kano Municipal | Kano   |
| 3415 | KN/0007 | KN/0007/S/4  | Hasiya Bayero Peadiatrics Hospital                     | Paediatrics, Pharmacy      | Kano City                                                                            | Kano Municipal | Kano   |
| 3416 | KN/0015 | KN/0015/S/15 | Sir Mohammed Sanusi Specialist Hosp.                   |                            | Yan Kaba, Kano                                                                       | Nasarawa       | Kano   |
| 3417 | KN/0015 | KN/0015/S/6  | Sir Mohammed Sanusi Specialist Hosp.                   |                            | Yan Kaba, Kano                                                                       | Nasarawa       | Kano   |
| 3418 | KN/0015 | KN/0015/S/10 | Sir Mohammed Sanusi Specialist Hosp.                   |                            | Yan Kaba, Kano                                                                       | Nasarawa       | Kano   |
| 3419 | KN/0015 | KN/0015/S/2  | Sir Mohammed Sanusi Specialist Hosp.                   |                            | Yan Kaba, Kano                                                                       | Nasarawa       | Kano   |
| 3420 | KN/0026 | KN/0026/S/5  | Khadijat Memorial Hospital                             |                            | No. 20 Katsina Road, Off Hajj Camp Road, Opp Customs Barrack                         | Fagge          | Kano   |
| 3421 | KN/0026 | KN/0026/S/1  | Khadijat Memorial Hospital                             |                            | No. 20 Katsina Road, Off Hajj Camp Road, Opp Customs Barrack                         | Fagge          | Kano   |
| 3422 | KN/0026 | KN/0026/S/3  | Khadijat Memorial Hospital                             |                            | No. 20 Katsina Road, Off Hajj Camp Road, Opp Customs Barrack                         | Fagge          | Kano   |
| 3423 | KN/0028 | KN/0028/S/2  | Mos-Metro Clinic                                       |                            | Sabon Gari, Kano                                                                     | Fagge          | Kano   |
| 3424 | KN/0028 | KN/0028/S/3  | Mos-Metro Clinic                                       |                            | Sabon Gari, Kano                                                                     | Fagge          | Kano   |
| 3425 | KN/0029 | KN/0029/S/2  | Unicare Clinic & Maternity                             |                            | Katsina Road , Kano                                                                  | Fagge          | Kano   |
| 3426 | KN/0029 | KN/0029/S/1  | Unicare Clinic & Maternity                             |                            | Katsina Road , Kano                                                                  | Fagge          | Kano   |
| 3427 | KN/0030 | KN/0030/S/1  | Topcare Specialist Medical Centre                      |                            | No; 118 Hadejia Rd , Kano                                                            | Nasarawa       | Kano   |
| 3428 | KN/0030 | KN/0030/S/2  | Topcare Specialist Medical Centre                      |                            | No; 118 Hadejia Rd , Kano                                                            | Nasarawa       | Kano   |
| 3429 | KN/0030 | KN/0030/S/3  | Topcare Specialist Medical Centre                      |                            | No; 118 Hadejia Rd , Kano                                                            | Nasarawa       | Kano   |
| 3430 | KN/0030 | KN/0030/S/9  | Topcare Specialist Medical Centre                      |                            | No; 118 Hadejia Rd , Kano                                                            | Nasarawa       | Kano   |
| 3431 | KN/0030 | KN/0030/S/6  | Topcare Specialist Medical Centre                      |                            | No; 118 Hadejia Rd , Kano                                                            | Nasarawa       | Kano   |
| 3432 | KN/0031 | KN/0031/S/3  | Ivory Clinic & Maternity                               |                            | Aminu Kano, Kano                                                                     | Kano Municipal | Kano   |
| 3433 | KN/0031 | KN/0031/S/2  | Ivory Clinic & Maternity                               |                            | Aminu Kano, Kano                                                                     | Kano Municipal | Kano   |
| 3434 | KN/0031 | KN/0031/S/1  | Ivory Clinic & Maternity                               |                            | Aminu Kano, Kano                                                                     | Kano Municipal | Kano   |
| 3435 | KN/0032 | KN/0032/S/8  | Premier Clinics                                        |                            | Gyadi Gyadi, Kano                                                                    | Tarauni        | Kano   |
| 3436 | KN/0032 | KN/0032/S/1  | Premier Clinics                                        |                            | Gyadi Gyadi, Kano                                                                    | Tarauni        | Kano   |
| 3437 | KN/0032 | KN/0032/S/3  | Premier Clinics                                        |                            | Gyadi Gyadi, Kano                                                                    | Tarauni        | Kano   |

|      |         |              |                                      |                                           |                                                         |                |      |
|------|---------|--------------|--------------------------------------|-------------------------------------------|---------------------------------------------------------|----------------|------|
| 3438 | KN/0032 | KN/0032/S/2  | Premier Clinics                      |                                           | Gyadi Gyadi, Kano                                       | Tarauni        | Kano |
| 3439 | KN/0034 | KN/0034/S/2  | Saymays Specialist Hospital Ltd      |                                           | Zoo Road, Kano                                          | Kano Municipal | Kano |
| 3440 | KN/0034 | KN/0034/S/6  | Saymays Specialist Hospital Ltd      |                                           | Zoo Road, Kano                                          | Kano Municipal | Kano |
| 3441 | KN/0034 | KN/0034/S/3  | Saymays Specialist Hospital Ltd      |                                           | Zoo Road, Kano                                          | Kano Municipal | Kano |
| 3442 | KN/0035 | KN/0035/S/7  | International Clinic & Hospital Ltd. |                                           | 40, Niger Street, Airport Road, Kano                    | Nasarawa       | Kano |
| 3443 | KN/0035 | KN/0035/S/6  | International Clinic & Hospital Ltd. |                                           | 40, Niger Street, Airport Road, Kano                    | Nasarawa       | Kano |
| 3444 | KN/0035 | KN/0035/S/8  | International Clinic & Hospital Ltd. |                                           | 40, Niger Street, Airport Road, Kano                    | Nasarawa       | Kano |
| 3445 | KN/0035 | KN/0035/S/3  | International Clinic & Hospital Ltd. |                                           | 40, Niger Street, Airport Road, Kano                    | Nasarawa       | Kano |
| 3446 | KN/0035 | KN/0035/S/5  | International Clinic & Hospital Ltd. |                                           | 40, Niger Street, Airport Road, Kano                    | Nasarawa       | Kano |
| 3447 | KN/0035 | KN/0035/S/2  | International Clinic & Hospital Ltd. |                                           | 40, Niger Street, Airport Road, Kano                    | Nasarawa       | Kano |
| 3448 | KN/0035 | KN/0035/S/14 | International Clinic & Hospital Ltd. |                                           | 40, Niger Street, Airport Road, Kano                    | Nasarawa       | Kano |
| 3449 | KN/0036 | KN/0036/S/2  | Medicus Clinics                      |                                           | No. 2 Beirut Road, Kano                                 | Kano Municipal | Kano |
| 3450 | KN/0036 | KN/0036/S/1  | Medicus Clinics                      |                                           | No. 2 Beirut Road, Kano                                 | Kano Municipal | Kano |
| 3451 | KN/0036 | KN/0036/S/5  | Medicus Clinics                      |                                           | No. 2 Beirut Road, Kano                                 | Kano Municipal | Kano |
| 3452 | KN/0036 | KN/0036/S/3  | Medicus Clinics                      |                                           | No. 2 Beirut Road, Kano                                 | Kano Municipal | Kano |
| 3453 | KN/0037 | KN/0037/S/2  | Al-Ammeen Medical Centre             |                                           | Maiduguri Road, Kano                                    | Tarauni        | Kano |
| 3454 | KN/0037 | KN/0037/S/1  | Al-Ammeen Medical Centre             |                                           | Maiduguri Road, Kano                                    | Tarauni        | Kano |
| 3455 | KN/0037 | KN/0037/S/3  | Al-Ammeen Medical Centre             |                                           | Maiduguri Road, Kano                                    | Tarauni        | Kano |
| 3456 | KN/0037 | KN/0037/S/6  | Al-Ammeen Medical Centre             |                                           | Maiduguri Road, Kano                                    | Tarauni        | Kano |
| 3457 | KN/0041 | KN/0041/S/5  | Warshi Hospital                      |                                           | Dakata, Kano                                            | Tarauni        | Kano |
| 3458 | KN/0041 | KN/0041/S/2  | Warshi Hospital                      |                                           | Dakata, Kano                                            | Tarauni        | Kano |
| 3459 | KN/0041 | KN/0041/S/3  | Warshi Hospital                      |                                           | Dakata, Kano                                            | Tarauni        | Kano |
| 3460 | KN/0041 | KN/0041/S/1  | Warshi Hospital                      |                                           | Dakata, Kano                                            | Tarauni        | Kano |
| 3461 | KN/0041 | KN/0041/S/6  | Warshi Hospital                      |                                           | Dakata, Kano                                            | Tarauni        | Kano |
| 3462 | KN/0042 | KN/0042/S/14 | Zaks Clinic and Maternity Ltd.       |                                           | Opp. Corner Dankura, Behind PDP HQ. Zoo Road, Kano      | Kano Municipal | Kano |
| 3463 | KN/0042 | KN/0042/S/3  | Zaks Clinic and Maternity Ltd.       |                                           | Opp. Corner Dankura, Behind PDP HQ. Zoo Road, Kano      | Kano Municipal | Kano |
| 3464 | KN/0042 | KN/0042/S/6  | Zaks Clinic and Maternity Ltd.       |                                           | Opp. Corner Dankura, Behind PDP HQ. Zoo Road, Kano      | Kano Municipal | Kano |
| 3465 | KN/0042 | KN/0042/S/1  | Zaks Clinic and Maternity Ltd.       |                                           | Opp. Corner Dankura, Behind PDP HQ. Zoo Road, Kano      | Kano Municipal | Kano |
| 3466 | KN/0042 | KN/0042/S/2  | Zaks Clinic and Maternity Ltd.       |                                           | Opp. Corner Dankura, Behind PDP HQ. Zoo Road, Kano      | Kano Municipal | Kano |
| 3467 | KN/0043 | KN/0043/S/3  | Global Clinic                        |                                           | No. 1, 33rd Link, Off New Court road, Gyadi-Gyadi, Kano | Kano Municipal | Kano |
| 3468 | KN/0043 | KN/0043/S/6  | Global Clinic                        |                                           | No. 1, 33rd Link, Off New Court road, Gyadi-Gyadi, Kano | Kano Municipal | Kano |
| 3469 | KN/0044 | KN/0044/S/2  | Classic Clinic Ltd.                  |                                           | 1a Abbass Road, Kano                                    | Nasarawa       | Kano |
| 3470 | KN/0044 | KN/0044/S/6  | Classic Clinic Ltd.                  |                                           | 1a Abbass Road, Kano                                    | Nasarawa       | Kano |
| 3471 | KN/0046 | KN/0046/S/2  | Ideal Hospital                       | -                                         | Sabon Gari, Kano                                        | Fagge          | Kano |
| 3472 | KN/0046 | KN/0046/S/1  | Ideal Hospital                       | -                                         | Sabon Gari, Kano                                        | Fagge          | Kano |
| 3473 | KN/0046 | KN/0046/S/3  | Ideal Hospital                       | -                                         | Sabon Gari, Kano                                        | Fagge          | Kano |
| 3474 | KN/0046 | KN/0046/S/5  | Ideal Hospital                       | -                                         | Sabon Gari, Kano                                        | Fagge          | Kano |
| 3475 | KN/0054 | KN/0054/S/1  | Arewa Surgery                        | Surgery, Oncology, ENT, O & G, Pediatrics |                                                         | Fagge          | Kano |
| 3476 | KN/0054 | KN/0054/S/6  | Arewa Surgery                        | Surgery, Oncology, ENT, O & G, Pediatrics |                                                         | Fagge          | Kano |
| 3477 | KN/0054 | KN/0054/S/3  | Arewa Surgery                        | Surgery, Oncology, ENT, O & G, Pediatrics |                                                         | Fagge          | Kano |
| 3478 | KN/0054 | KN/0054/S/12 | Arewa Surgery                        | Surgery, Oncology, ENT, O & G, Pediatrics |                                                         | Fagge          | Kano |
| 3479 | KN/0065 | KN/0065/S/4  | Madaci Pharmacy Ltd.                 | Pharmacy                                  | No. 60 Tudun Bojuwa, Kurna Asabe, Kano                  | Fagge          | Kano |
| 3480 | KN/0067 | KN/0067/S/5  | Express Diagnostic Laboratories Ltd. | Laboratory                                | Gandun Albasa, Off Zoo Road, Kano                       | Kano Municipal | Kano |
| 3481 | KN/0070 | KN/0070/S/1  | Barewa Clinic & Maternity            |                                           | 11, Zaria Road, Kano.                                   | Kumbotso       | Kano |
| 3482 | KN/0070 | KN/0070/S/14 | Barewa Clinic & Maternity            |                                           | 11, Zaria Road, Kano.                                   | Kumbotso       | Kano |

|      |         |              |                                        |  |                               |                |      |
|------|---------|--------------|----------------------------------------|--|-------------------------------|----------------|------|
| 3483 | KN/0070 | KN/0070/S/6  | Barewa Clinic & Maternity              |  | 11, Zaria Road, Kano.         | Kumbotso       | Kano |
| 3484 | KN/0070 | KN/0070/S/2  | Barewa Clinic & Maternity              |  | 11, Zaria Road, Kano.         | Kumbotso       | Kano |
| 3485 | KN/0070 | KN/0070/S/3  | Barewa Clinic & Maternity              |  | 11, Zaria Road, Kano.         | Kumbotso       | Kano |
| 3486 | KN/0070 | KN/0070/S/5  | Barewa Clinic & Maternity              |  | 11, Zaria Road, Kano.         | Kumbotso       | Kano |
| 3487 | KN/0075 | KN/0075/S/15 | General Hospital, Gwarzo               |  | P.O. BOX 10911 Kano,          | Gwarzo         | Kano |
| 3488 | KN/0075 | KN/0075/S/2  | General Hospital, Gwarzo               |  | P.O. BOX 10911 Kano,          | Gwarzo         | Kano |
| 3489 | KN/0075 | KN/0075/S/1  | General Hospital, Gwarzo               |  | P.O. BOX 10911 Kano,          | Gwarzo         | Kano |
| 3490 | KN/0076 | KN/0076/S/15 | Murtala Mohammed Spec. Hospital        |  | Kano City, Kano State         | Kano Municipal | Kano |
| 3491 | KN/0076 | KN/0076/S/8  | Murtala Mohammed Spec. Hospital        |  | Kano City, Kano State         | Kano Municipal | Kano |
| 3492 | KN/0076 | KN/0076/S/4  | Murtala Mohammed Spec. Hospital        |  | Kano City, Kano State         | Kano Municipal | Kano |
| 3493 | KN/0076 | KN/0076/S/5  | Murtala Mohammed Spec. Hospital        |  | Kano City, Kano State         | Kano Municipal | Kano |
| 3494 | KN/0076 | KN/0076/S/7  | Murtala Mohammed Spec. Hospital        |  | Kano City, Kano State         | Kano Municipal | Kano |
| 3495 | KN/0077 | KN/0077/S/2  | General Hospital, Wudil                |  | Wudil, Kano, Kano State       | Wudil          | Kano |
| 3496 | KN/0077 | KN/0077/S/3  | General Hospital, Wudil                |  | Wudil, Kano, Kano State       | Wudil          | Kano |
| 3497 | KN/0077 | KN/0077/S/1  | General Hospital, Wudil                |  | Wudil, Kano, Kano State       | Wudil          | Kano |
| 3498 | KN/0077 | KN/0077/S/4  | General Hospital, Wudil                |  | Wudil, Kano, Kano State       | Wudil          | Kano |
| 3499 | KN/0077 | KN/0077/S/5  | General Hospital, Wudil                |  | Wudil, Kano, Kano State       | Wudil          | Kano |
| 3500 | KN/0078 | KN/0078/S/7  | Mohammed Abdullahi Wase Spec. Hospital |  | Nasarawa, Kano, Kano State    | Nasarawa       | Kano |
| 3501 | KN/0078 | KN/0078/S/5  | Mohammed Abdullahi Wase Spec. Hospital |  | Nasarawa, Kano, Kano State    | Nasarawa       | Kano |
| 3502 | KN/0078 | KN/0078/S/12 | Mohammed Abdullahi Wase Spec. Hospital |  | Nasarawa, Kano, Kano State    | Nasarawa       | Kano |
| 3503 | KN/0078 | KN/0078/S/6  | Mohammed Abdullahi Wase Spec. Hospital |  | Nasarawa, Kano, Kano State    | Nasarawa       | Kano |
| 3504 | KN/0078 | KN/0078/S/10 | Mohammed Abdullahi Wase Spec. Hospital |  | Nasarawa, Kano, Kano State    | Nasarawa       | Kano |
| 3505 | KN/0078 | KN/0078/S/2  | Mohammed Abdullahi Wase Spec. Hospital |  | Nasarawa, Kano, Kano State    | Nasarawa       | Kano |
| 3506 | KN/0078 | KN/0078/S/1  | Mohammed Abdullahi Wase Spec. Hospital |  | Nasarawa, Kano, Kano State    | Nasarawa       | Kano |
| 3507 | KN/0078 | KN/0078/S/15 | Mohammed Abdullahi Wase Spec. Hospital |  | Nasarawa, Kano, Kano State    | Nasarawa       | Kano |
| 3508 | KN/0078 | KN/0078/S/4  | Mohammed Abdullahi Wase Spec. Hospital |  | Nasarawa, Kano, Kano State    | Nasarawa       | Kano |
| 3509 | KN/0079 | KN/0079/S/1  | General Hospital, Danbatta             |  | Danbata, Kano, Kano State     | Danbata        | Kano |
| 3510 | KN/0079 | KN/0079/S/4  | General Hospital, Danbatta             |  | Danbata, Kano, Kano State     | Danbata        | Kano |
| 3511 | KN/0079 | KN/0079/S/2  | General Hospital, Danbatta             |  | Danbata, Kano, Kano State     | Danbata        | Kano |
| 3512 | KN/0079 | KN/0079/S/5  | General Hospital, Danbatta             |  | Danbata, Kano, Kano State     | Danbata        | Kano |
| 3513 | KN/0081 | KN/0081/S/2  | Sheikh Mohammed Jida Gen. Hospital     |  | Sabon Gari, Kano, Kano State  | Fagge          | Kano |
| 3514 | KN/0081 | KN/0081/S/15 | Sheikh Mohammed Jida Gen. Hospital     |  | Sabon Gari, Kano, Kano State  | Fagge          | Kano |
| 3515 | KN/0081 | KN/0081/S/6  | Sheikh Mohammed Jida Gen. Hospital     |  | Sabon Gari, Kano, Kano State  | Fagge          | Kano |
| 3516 | KN/0082 | KN/0082/S/6  | Aminu Kano Teaching Hospital           |  | Gyadi Gyadi, Kano, Kano State | Tarauni        | Kano |
| 3517 | KN/0082 | KN/0082/S/9  | Aminu Kano Teaching Hospital           |  | Gyadi Gyadi, Kano, Kano State | Tarauni        | Kano |
| 3518 | KN/0082 | KN/0082/S/1  | Aminu Kano Teaching Hospital           |  | Gyadi Gyadi, Kano, Kano State | Tarauni        | Kano |
| 3519 | KN/0082 | KN/0082/S/12 | Aminu Kano Teaching Hospital           |  | Gyadi Gyadi, Kano, Kano State | Tarauni        | Kano |
| 3520 | KN/0082 | KN/0082/S/2  | Aminu Kano Teaching Hospital           |  | Gyadi Gyadi, Kano, Kano State | Tarauni        | Kano |
| 3521 | KN/0082 | KN/0082/S/10 | Aminu Kano Teaching Hospital           |  | Gyadi Gyadi, Kano, Kano State | Tarauni        | Kano |
| 3522 | KN/0082 | KN/0082/S/5  | Aminu Kano Teaching Hospital           |  | Gyadi Gyadi, Kano, Kano State | Tarauni        | Kano |

|      |         |              |                                        |                                   |                                                         |           |        |
|------|---------|--------------|----------------------------------------|-----------------------------------|---------------------------------------------------------|-----------|--------|
| 3523 | KN/0082 | KN/0082/S/8  | Aminu Kano Teaching Hospital           |                                   | Gyadi Gyadi, Kano, Kano State                           | Tarauni   | Kano   |
| 3524 | KN/0082 | KN/0082/S/4  | Aminu Kano Teaching Hospital           |                                   | Gyadi Gyadi, Kano, Kano State                           | Tarauni   | Kano   |
| 3525 | KN/0082 | KN/0082/S/7  | Aminu Kano Teaching Hospital           |                                   | Gyadi Gyadi, Kano, Kano State                           | Tarauni   | Kano   |
| 3526 | KN/0086 | KN/0086/S/5  | Bayero University Health Centre        |                                   | Kano, Kano State                                        | Ungogo    | Kano   |
| 3527 | KN/0086 | KN/0086/S/4  | Bayero University Health Centre        |                                   | Kano, Kano State                                        | Ungogo    | Kano   |
| 3528 | KN/0091 | KN/0091/S/7  | National Orthopaedic Hospital, Kano    |                                   | Kano, Kano                                              | Dala      | Kano   |
| 3529 | KN/0091 | KN/0091/S/10 | National Orthopaedic Hospital, Kano    |                                   | Kano, Kano                                              | Dala      | Kano   |
| 3530 | KN/0091 | KN/0091/S/11 | National Orthopaedic Hospital, Kano    |                                   | Kano, Kano                                              | Dala      | Kano   |
| 3531 | KN/0091 | KN/0091/S/4  | National Orthopaedic Hospital, Kano    |                                   | Kano, Kano                                              | Dala      | Kano   |
| 3532 | KN/0091 | KN/0091/S/3  | National Orthopaedic Hospital, Kano    |                                   | Kano, Kano                                              | Dala      | Kano   |
| 3533 | KN/0095 | KN/0095/S/3  | Standard Special Hospital              | Primary Provider                  | 8A Lamido Crescent Nassarawa Kano                       | Nasarawa  | Kano   |
| 3534 | KN/0095 | KN/0095/S/6  | Standard Special Hospital              | Primary Provider                  | 8A Lamido Crescent Nassarawa Kano                       | Nasarawa  | Kano   |
| 3535 | KN/0096 | KN/0096/S/14 | Cordial Hospital & Maternity           | Primary Provider                  | 68 Sarkin Yaki Nomansland Kano                          | Fagge     | Kano   |
| 3536 | KN/0096 | KN/0096/S/5  | Cordial Hospital & Maternity           | Primary Provider                  | 68 Sarkin Yaki Nomansland Kano                          | Fagge     | Kano   |
| 3537 | KN/0104 | KN/0104/S/4  | Zeenat Pharmacy & Stores               | Pharmacy                          | C4 Farm Centre, Opp Marhaba Cinema Kano                 | Tarauni   | Kano   |
| 3538 | KN/0108 | KN/0108/S/5  | Good Pasture Clinic                    |                                   | 6, Citta Avenue, Noman''''''s Land, Kano                | Fagge     | Kano   |
| 3539 | KN/0108 | KN/0108/S/7  | Good Pasture Clinic                    |                                   | 6, Citta Avenue, Noman''''''s Land, Kano                | Fagge     | Kano   |
| 3540 | KN/0109 | KN/0109/S/5  | Lafiya Surgery                         |                                   | 52, Ogoja Street, Sabon Gari, Kano                      | Fagge     | Kano   |
| 3541 | KN/0109 | KN/0109/S/3  | Lafiya Surgery                         |                                   | 52, Ogoja Street, Sabon Gari, Kano                      | Fagge     | Kano   |
| 3542 | KN/0109 | KN/0109/S/1  | Lafiya Surgery                         |                                   | 52, Ogoja Street, Sabon Gari, Kano                      | Fagge     | Kano   |
| 3543 | KN/0109 | KN/0109/S/14 | Lafiya Surgery                         |                                   | 52, Ogoja Street, Sabon Gari, Kano                      | Fagge     | Kano   |
| 3544 | KN/0109 | KN/0109/S/7  | Lafiya Surgery                         |                                   | 52, Ogoja Street, Sabon Gari, Kano                      | Fagge     | Kano   |
| 3545 | KN/0115 | KN/0115/S/3  | Al Noury Specialist Hospital           |                                   | No 1 Iyaka Road off Zaria Road, Kano                    | Tarauni   | Kano   |
| 3546 | KN/0120 | KN/0120/S/4  | Nigerian Law School Medical Centre     |                                   | Tiga Road, Off Zaria - Kano Express Road, Kano          | Bebeji    | Kano   |
| 3547 | KN/0123 | KN/0123/S/4  | ALCON Pharmacy                         | Pharmacy                          | No. 11A Bompai Road, Kano                               | Nasarawa  | Kano   |
| 3548 | KN/0124 | KN/0124/S/4  | Al-Huda Pharm. Stores                  | Pharmacy                          | 125 Bello Road, Kano                                    | Fagge     | Kano   |
| 3549 | KN/0125 | KN/0125/S/3  | Alnoury Specialist Hospital            | O&G                               | No. 1 Iyaka Road, off Zaria Rd, Gyadi Gyadi, Kano State | Tarauni   | Kano   |
| 3550 | KN/0130 | KN/0130/S/4  | Lumba Pharmacy Ltd                     | Pharmacy                          | 113 Court Rd, Gyadi-Gyadi, Kano                         | Tarauni   | Kano   |
| 3551 | KN/0131 | KN/0131/S/4  | Model Pharmaceutical & Supplies Ltd    | Pharmacy                          | No. 2A Bompai Road, Kano.                               | Nasarawa  | Kano   |
| 3552 | KN/0133 | KN/0133/S/4  | Sylmat Pharmacy                        | Pharmacy                          | No. 264 Hadejia Road, Kano                              | Nasarawa  | Kano   |
| 3553 | KN/0134 | KN/0134/S/4  | Vitamex Pharmaceuticals                | Pharmacy                          | Plot 302, New Hospital Road, Gyadi Gyadi, Kano          | Tarauni   | Kano   |
| 3554 | KN/0135 | KN/0135/S/3  | Pinnacle Specialist Hospital, Kano     |                                   | Plot 11-12 Hausawa Quarters, Kano                       | Kumbotso  | Kano   |
| 3555 | KN/0135 | KN/0135/S/1  | Pinnacle Specialist Hospital, Kano     |                                   | Plot 11-12 Hausawa Quarters, Kano                       | Kumbotso  | Kano   |
| 3556 | KN/0135 | KN/0135/S/6  | Pinnacle Specialist Hospital, Kano     |                                   | Plot 11-12 Hausawa Quarters, Kano                       | Kumbotso  | Kano   |
| 3557 | KN/0135 | KN/0135/S/2  | Pinnacle Specialist Hospital, Kano     |                                   | Plot 11-12 Hausawa Quarters, Kano                       | Kumbotso  | Kano   |
| 3558 | KN/0139 | KN/0139/S/4  | Carey-gold Pharmacy                    | Pharmacy                          | Tarauni Market Road, Off Sabo Bakin Zuwo Road, Kano     | Tarauni   | Kano   |
| 3559 | KN/0141 | KN/0141/S/4  | ECWA Hospital                          | Pharmacy, Opthamology, Laboratory | Off Airport Road, Kano                                  | Aba North | Abia   |
| 3560 | KN/0141 | KN/0141/S/15 | ECWA Hospital                          | Pharmacy, Opthamology, Laboratory | Off Airport Road, Kano                                  | Aba North | Abia   |
| 3561 | KN/0146 | KN/0146/S/5  | Goldstone Diagnostic Services Nig. Ltd | Laboratory                        | Sabo Gari                                               | Abakaliki | Ebonyi |

|      |         |              |                                                         |  |                                                                                         |          |      |
|------|---------|--------------|---------------------------------------------------------|--|-----------------------------------------------------------------------------------------|----------|------|
| 3562 | KN/0149 | KN/0149/S/2  | Amity Hospital & Medical Services Ltd                   |  | 10, 13 Link off court Rd, Hausawa, Kano State                                           | Tarauni  | Kano |
| 3563 | KN/0149 | KN/0149/S/1  | Amity Hospital & Medical Services Ltd                   |  | 10, 13 Link off court Rd, Hausawa, Kano State                                           | Tarauni  | Kano |
| 3564 | KN/0149 | KN/0149/S/3  | Amity Hospital & Medical Services Ltd                   |  | 10, 13 Link off court Rd, Hausawa, Kano State                                           | Tarauni  | Kano |
| 3565 | KN/0149 | KN/0149/S/6  | Amity Hospital & Medical Services Ltd                   |  | 10, 13 Link off court Rd, Hausawa, Kano State                                           | Tarauni  | Kano |
| 3566 | KN/0151 | KN/0151/S/10 | Fazma Orthopedic Hospital                               |  | 181, Airport Road, Kano                                                                 | Nasarawa | Kano |
| 3567 | KN/0154 | KN/0154/S/6  | Wisdom Hospital                                         |  | 2, Abdullahi Bayero Street, Beside Nasarawa Hosp, Kano State                            | Nasarawa | Kano |
| 3568 | KN/0154 | KN/0154/S/1  | Wisdom Hospital                                         |  | 2, Abdullahi Bayero Street, Beside Nasarawa Hosp, Kano State                            | Nasarawa | Kano |
| 3569 | KN/0155 | KN/0155/S/1  | NOL International Hospital and Diagnosis Centre Limited |  | 1A Sultan Road Nassarawa GRA, Kano                                                      | Tarauni  | Kano |
| 3570 | KN/0155 | KN/0155/S/2  | NOL International Hospital and Diagnosis Centre Limited |  | 1A Sultan Road Nassarawa GRA, Kano                                                      | Tarauni  | Kano |
| 3571 | KN/0155 | KN/0155/S/3  | NOL International Hospital and Diagnosis Centre Limited |  | 1A Sultan Road Nassarawa GRA, Kano                                                      | Tarauni  | Kano |
| 3572 | KN/0155 | KN/0155/S/5  | NOL International Hospital and Diagnosis Centre Limited |  | 1A Sultan Road Nassarawa GRA, Kano                                                      | Tarauni  | Kano |
| 3573 | KN/0155 | KN/0155/S/6  | NOL International Hospital and Diagnosis Centre Limited |  | 1A Sultan Road Nassarawa GRA, Kano                                                      | Tarauni  | Kano |
| 3574 | KN/0156 | KN/0156/S/2  | Al Farma Ultra Modern Hospital and Diagnostic Centre    |  | 7A Katsina Road Opp. Federal Secretariat, Kano                                          | Fagge    | Kano |
| 3575 | KN/0156 | KN/0156/S/3  | Al Farma Ultra Modern Hospital and Diagnostic Centre    |  | 7A Katsina Road Opp. Federal Secretariat, Kano                                          | Fagge    | Kano |
| 3576 | KN/0156 | KN/0156/S/7  | Al Farma Ultra Modern Hospital and Diagnostic Centre    |  | 7A Katsina Road Opp. Federal Secretariat, Kano                                          | Fagge    | Kano |
| 3577 | KN/0156 | KN/0156/S/8  | Al Farma Ultra Modern Hospital and Diagnostic Centre    |  | 7A Katsina Road Opp. Federal Secretariat, Kano                                          | Fagge    | Kano |
| 3578 | KN/0156 | KN/0156/S/1  | Al Farma Ultra Modern Hospital and Diagnostic Centre    |  | 7A Katsina Road Opp. Federal Secretariat, Kano                                          | Fagge    | Kano |
| 3579 | KN/0161 | KN/0161/S/4  | Abubakar Imam Urology Centre                            |  | 144, Murtala Mohammed Way, Opp Triumph Newspaper, Akija, Kano, Kano State.              | Fagge    | Kano |
| 3580 | KN/0161 | KN/0161/S/18 | Abubakar Imam Urology Centre                            |  | 144, Murtala Mohammed Way, Opp Triumph Newspaper, Akija, Kano, Kano State.              | Fagge    | Kano |
| 3581 | KN/0166 | KN/0166/S/5  | Waziri Shehu Gidado General Hospital                    |  | Bachirawa Katsina Road, Kano State                                                      | Fagge    | Kano |
| 3582 | KN/0166 | KN/0166/S/4  | Waziri Shehu Gidado General Hospital                    |  | Bachirawa Katsina Road, Kano State                                                      | Fagge    | Kano |
| 3583 | KN/0167 | KN/0167/S/10 | Albarka Clinic                                          |  | Kofar/Dawanau Dandiwshe Kano, Kano State.                                               | Dala     | Kano |
| 3584 | KN/0168 | KN/0168/S/5  | Klinchex Laboratory & Diagnostics                       |  | No. 3 Opp. B.U.K Old Site Kano, Kano State                                              | Gwale    | Kano |
| 3585 | KN/0169 | KN/0169/S/15 | Maryam Eye Centre                                       |  | Sabuwa Abuja Off. Aforestation Road Off. Gwarzo Road Kabuga, Kano, Kano State.          | Gwale    | Kano |
| 3586 | KN/0170 | KN/0170/S/3  | Sumar Specialist Clinics                                |  | Airport Road, Behind Kabo Holdings By Kriss Nursery & Primary School, Kano, Kano State. | Nasarawa | Kano |
| 3587 | KN/0171 | KN/0171/S/3  | Greenland Clinics And Maternity Ltd                     |  | No. 49a Sarki Yaki Street Nomansland Kano State.                                        | Nasarawa | Kano |
| 3588 | KN/0172 | KN/0172/S/1  | Prime Specialist Hospital                               |  | 19 Lamodo Crescent Kano, Kano State                                                     | Nasarawa | Kano |
| 3589 | KN/0174 | KN/0174/S/11 | Sauki Gym & Physiotherapy Clinic                        |  | No. 16 Zaria Road, Kano, Kano State                                                     | Tarauni  | Kano |

|      |         |              |                                               |  |                                                                                          |           |         |
|------|---------|--------------|-----------------------------------------------|--|------------------------------------------------------------------------------------------|-----------|---------|
| 3590 | KN/0175 | KN/0175/S/11 | Sauki Gym & Physiotherapy Clinic              |  | No. 16 Zaria Road, Kano, Kano State.                                                     | Tarauni   | Kano    |
| 3591 | KN/0176 | KN/0176/S/12 | Mai Akoko Clinic                              |  | No. 96 Naibawa Yanlema, Kano, Kano State                                                 | Kumbotso  | Kano    |
| 3592 | KN/0177 | KN/0177/S/1  | Oasis Clinic Maternity                        |  | Ungwu Uku U- Turn Behind Matrix Filling Station, Opposite Zenith Bank, Kano, Kano State. | Kumbotso  | Kano    |
| 3593 | KN/0177 | KN/0177/S/5  | Oasis Clinic Maternity                        |  | Ungwu Uku U- Turn Behind Matrix Filling Station, Opposite Zenith Bank, Kano, Kano State. | Kumbotso  | Kano    |
| 3594 | KN/0177 | KN/0177/S/3  | Oasis Clinic Maternity                        |  | Ungwu Uku U- Turn Behind Matrix Filling Station, Opposite Zenith Bank, Kano, Kano State. | Kumbotso  | Kano    |
| 3595 | KN/0178 | KN/0178/S/3  | City Clinic & Maternity                       |  | No. 149 Daurawa Quarters, Maiduguri Road, Kano, Kano State.                              | Tarauni   | Kano    |
| 3596 | KN/0178 | KN/0178/S/6  | City Clinic & Maternity                       |  | No. 149 Daurawa Quarters, Maiduguri Road, Kano, Kano State.                              | Tarauni   | Kano    |
| 3597 | KN/0178 | KN/0178/S/5  | City Clinic & Maternity                       |  | No. 149 Daurawa Quarters, Maiduguri Road, Kano, Kano State.                              | Tarauni   | Kano    |
| 3598 | KN/0179 | KN/0179/S/12 | Multicare ENT                                 |  | No. 66 Lamido Crescent, Nasarawa G.R.A Kano, Kano State.                                 | Nasarawa  | Kano    |
| 3599 | KN/0181 | KN/0181/S/5  | Northwest University Teaching Hospital        |  | Off Zaria Road Kano                                                                      | Gwale     | Kano    |
| 3600 | KN/0181 | KN/0181/S/2  | Northwest University Teaching Hospital        |  | Off Zaria Road Kano                                                                      | Gwale     | Kano    |
| 3601 | KN/0181 | KN/0181/S/4  | Northwest University Teaching Hospital        |  | Off Zaria Road Kano                                                                      | Gwale     | Kano    |
| 3602 | KN/0182 | KN/0182/S/15 | Al-Ihsan Expert Medical and Diagnostic Centre |  | 312,Tudu Fulani, Darmanawa Qtrs. Kano                                                    | Kumbotso  | Kano    |
| 3603 | KN/0182 | KN/0182/S/1  | Al-Ihsan Expert Medical and Diagnostic Centre |  | 312,Tudu Fulani, Darmanawa Qtrs. Kano                                                    | Kumbotso  | Kano    |
| 3604 | KT/0001 | KT/0001/S/14 | Bakori Clinic & Maternity                     |  | 1, Raba Road, Bakori, behind Sharia Court, Bakori, Katsina State                         | Bakori    | Katsina |
| 3605 | KT/0005 | KT/0005/S/8  | General Hospital, Daura                       |  | Daura                                                                                    | Daura     | Katsina |
| 3606 | KT/0005 | KT/0005/S/7  | General Hospital, Daura                       |  | Daura                                                                                    | Daura     | Katsina |
| 3607 | KT/0005 | KT/0005/S/5  | General Hospital, Daura                       |  | Daura                                                                                    | Daura     | Katsina |
| 3608 | KT/0005 | KT/0005/S/4  | General Hospital, Daura                       |  | Daura                                                                                    | Daura     | Katsina |
| 3609 | KT/0009 | KT/0009/S/15 | General Hospital, Dutsinma                    |  | Dutsinma                                                                                 | Dutsin-Ma | Katsina |
| 3610 | KT/0009 | KT/0009/S/5  | General Hospital, Dutsinma                    |  | Dutsinma                                                                                 | Dutsin-Ma | Katsina |
| 3611 | KT/0009 | KT/0009/S/8  | General Hospital, Dutsinma                    |  | Dutsinma                                                                                 | Dutsin-Ma | Katsina |
| 3612 | KT/0009 | KT/0009/S/4  | General Hospital, Dutsinma                    |  | Dutsinma                                                                                 | Dutsin-Ma | Katsina |
| 3613 | KT/0012 | KT/0012/S/15 | General Hospital Funtua                       |  | Funtua                                                                                   | Funtua    | Katsina |
| 3614 | KT/0012 | KT/0012/S/14 | General Hospital Funtua                       |  | Funtua                                                                                   | Funtua    | Katsina |
| 3615 | KT/0012 | KT/0012/S/1  | General Hospital Funtua                       |  | Funtua                                                                                   | Funtua    | Katsina |
| 3616 | KT/0012 | KT/0012/S/3  | General Hospital Funtua                       |  | Funtua                                                                                   | Funtua    | Katsina |
| 3617 | KT/0012 | KT/0012/S/4  | General Hospital Funtua                       |  | Funtua                                                                                   | Funtua    | Katsina |
| 3618 | KT/0012 | KT/0012/S/7  | General Hospital Funtua                       |  | Funtua                                                                                   | Funtua    | Katsina |
| 3619 | KT/0012 | KT/0012/S/5  | General Hospital Funtua                       |  | Funtua                                                                                   | Funtua    | Katsina |
| 3620 | KT/0012 | KT/0012/S/8  | General Hospital Funtua                       |  | Funtua                                                                                   | Funtua    | Katsina |
| 3621 | KT/0013 | KT/0013/S/1  | Khadijat Medical Center                       |  | No. 53 Katsina Road Funtua                                                               | Funtua    | Katsina |
| 3622 | KT/0013 | KT/0013/S/3  | Khadijat Medical Center                       |  | No. 53 Katsina Road Funtua                                                               | Funtua    | Katsina |
| 3623 | KT/0013 | KT/0013/S/4  | Khadijat Medical Center                       |  | No. 53 Katsina Road Funtua                                                               | Funtua    | Katsina |
| 3624 | KT/0014 | KT/0014/S/3  | Bistit Hospital                               |  | No. 36 Katsina Road                                                                      | Funtua    | Katsina |
| 3625 | KT/0014 | KT/0014/S/5  | Bistit Hospital                               |  | No. 36 Katsina Road                                                                      | Funtua    | Katsina |
| 3626 | KT/0016 | KT/0016/S/5  | Nakowa Hospital & Ultra Sound Center          |  | Sokoto Road, Funtua                                                                      | Funtua    | Katsina |



|      |         |              |                                           |            |                                        |           |         |
|------|---------|--------------|-------------------------------------------|------------|----------------------------------------|-----------|---------|
| 3627 | KT/0018 | KT/0018/S/4  | Khadija Medi Pharm. Co. Ltd               | Pharmacy   | 53 Katsina Road, Funtua                | Funtua    | Katsina |
| 3628 | KT/0020 | KT/0020/S/4  | General Hospital, Kankiya                 |            | Kankiya                                | Kankia    | Katsina |
| 3629 | KT/0020 | KT/0020/S/5  | General Hospital, Kankiya                 |            | Kankiya                                | Kankia    | Katsina |
| 3630 | KT/0020 | KT/0020/S/7  | General Hospital, Kankiya                 |            | Kankiya                                | Kankia    | Katsina |
| 3631 | KT/0020 | KT/0020/S/8  | General Hospital, Kankiya                 |            | Kankiya                                | Kankia    | Katsina |
| 3632 | KT/0021 | KT/0021/S/1  | Federal Medical Center, Katsina           |            | Murtala Mohammed Way                   | Katsina   | Katsina |
| 3633 | KT/0021 | KT/0021/S/4  | Federal Medical Center, Katsina           |            | Murtala Mohammed Way                   | Katsina   | Katsina |
| 3634 | KT/0021 | KT/0021/S/2  | Federal Medical Center, Katsina           |            | Murtala Mohammed Way                   | Katsina   | Katsina |
| 3635 | KT/0021 | KT/0021/S/11 | Federal Medical Center, Katsina           |            | Murtala Mohammed Way                   | Katsina   | Katsina |
| 3636 | KT/0021 | KT/0021/S/7  | Federal Medical Center, Katsina           |            | Murtala Mohammed Way                   | Katsina   | Katsina |
| 3637 | KT/0021 | KT/0021/S/5  | Federal Medical Center, Katsina           |            | Murtala Mohammed Way                   | Katsina   | Katsina |
| 3638 | KT/0021 | KT/0021/S/6  | Federal Medical Center, Katsina           |            | Murtala Mohammed Way                   | Katsina   | Katsina |
| 3639 | KT/0021 | KT/0021/S/15 | Federal Medical Center, Katsina           |            | Murtala Mohammed Way                   | Katsina   | Katsina |
| 3640 | KT/0021 | KT/0021/S/3  | Federal Medical Center, Katsina           |            | Murtala Mohammed Way                   | Katsina   | Katsina |
| 3641 | KT/0024 | KT/0024/S/4  | Federal College Of Education Staff Clinic |            | Katsina                                | Katsina   | Katsina |
| 3642 | KT/0030 | KT/0030/S/4  | Rahusa Pharmacy & Stores                  | Pharmacy   | Behind General Hospital                | Kankia    | Katsina |
| 3643 | KT/0031 | KT/0031/S/4  | Sulhu Pharmaceutical Chemist              | Pharmacy   | No.4 Kaduna Street, Kofar Keke         | Katsina   | Katsina |
| 3644 | KT/0036 | KT/0036/S/15 | General Hospital Mani                     |            | Mani-Mashi Road Katsina                | Mani      | Katsina |
| 3645 | KT/0036 | KT/0036/S/4  | General Hospital Mani                     |            | Mani-Mashi Road Katsina                | Mani      | Katsina |
| 3646 | KT/0036 | KT/0036/S/8  | General Hospital Mani                     |            | Mani-Mashi Road Katsina                | Mani      | Katsina |
| 3647 | KT/0036 | KT/0036/S/5  | General Hospital Mani                     |            | Mani-Mashi Road Katsina                | Mani      | Katsina |
| 3648 | KT/0039 | KT/0039/S/5  | Katsina General Hospital                  |            | Katsina, Katsina State                 | Katsina   | Katsina |
| 3649 | KT/0039 | KT/0039/S/8  | Katsina General Hospital                  |            | Katsina, Katsina State                 | Katsina   | Katsina |
| 3650 | KT/0039 | KT/0039/S/4  | Katsina General Hospital                  |            | Katsina, Katsina State                 | Katsina   | Katsina |
| 3651 | KT/0039 | KT/0039/S/2  | Katsina General Hospital                  |            | Katsina, Katsina State                 | Katsina   | Katsina |
| 3652 | KT/0039 | KT/0039/S/6  | Katsina General Hospital                  |            | Katsina, Katsina State                 | Katsina   | Katsina |
| 3653 | KT/0039 | KT/0039/S/1  | Katsina General Hospital                  |            | Katsina, Katsina State                 | Katsina   | Katsina |
| 3654 | KT/0039 | KT/0039/S/3  | Katsina General Hospital                  |            | Katsina, Katsina State                 | Katsina   | Katsina |
| 3655 | KT/0039 | KT/0039/S/15 | Katsina General Hospital                  |            | Katsina, Katsina State                 | Katsina   | Katsina |
| 3656 | KT/0039 | KT/0039/S/7  | Katsina General Hospital                  |            | Katsina, Katsina State                 | Katsina   | Katsina |
| 3657 | KT/0040 | KT/0040/S/5  | Muslim Community Laboratory               | Laboratory | School of Health Technology, Katsina   | Katsina   | Katsina |
| 3658 | KT/0042 | KT/0042/S/7  | General Hospital, Malufashi               |            | Malufashi, Katsina State               | Malufashi | Katsina |
| 3659 | KT/0042 | KT/0042/S/4  | General Hospital, Malufashi               |            | Malufashi, Katsina State               | Malufashi | Katsina |
| 3660 | KT/0042 | KT/0042/S/8  | General Hospital, Malufashi               |            | Malufashi, Katsina State               | Malufashi | Katsina |
| 3661 | KT/0042 | KT/0042/S/5  | General Hospital, Malufashi               |            | Malufashi, Katsina State               | Malufashi | Katsina |
| 3662 | KT/0055 | KT/0055/S/5  | New Funtua Clinic                         |            | 3 Jabir Roundabout, Zaria Road, Funtua | Funtua    | Katsina |
| 3663 | KT/0063 | KT/0063/S/4  | Mubek Pharmacy                            |            | federal Medical Centre, Katsina        | Katsina   | Katsina |
| 3664 | KT/0067 | KT/0067/S/5  | Maternal and Children Hospital            |            | Kafur Road. Malufashi                  | Malufashi | Katsina |
| 3665 | KT/0067 | KT/0067/S/6  | Maternal and Children Hospital            |            | Kafur Road. Malufashi                  | Malufashi | Katsina |
| 3666 | KT/0067 | KT/0067/S/7  | Maternal and Children Hospital            |            | Kafur Road. Malufashi                  | Malufashi | Katsina |
| 3667 | KT/0067 | KT/0067/S/4  | Maternal and Children Hospital            |            | Kafur Road. Malufashi                  | Malufashi | Katsina |
| 3668 | KT/0067 | KT/0067/S/3  | Maternal and Children Hospital            |            | Kafur Road. Malufashi                  | Malufashi | Katsina |
| 3669 | KT/0067 | KT/0067/S/1  | Maternal and Children Hospital            |            | Kafur Road. Malufashi                  | Malufashi | Katsina |
| 3670 | KT/0068 | KT/0068/S/3  | K Dara Specialist Clinic Limited          |            | Gidan Dawa                             | Katsina   | Katsina |

|      |         |              |                                                 |                                           |                                                                     |             |         |
|------|---------|--------------|-------------------------------------------------|-------------------------------------------|---------------------------------------------------------------------|-------------|---------|
| 3671 | KT/0070 | KT/0070/S/1  | Turai Umar Yar'Adua Maternity Children Hospital |                                           | Gidan Dawa off Hassan Usman Katsina Road, Katsina                   | Katsina     | Katsina |
| 3672 | KT/0070 | KT/0070/S/4  | Turai Umar Yar'Adua Maternity Children Hospital |                                           | Gidan Dawa off Hassan Usman Katsina Road, Katsina                   | Katsina     | Katsina |
| 3673 | KT/0070 | KT/0070/S/5  | Turai Umar Yar'Adua Maternity Children Hospital |                                           | Gidan Dawa off Hassan Usman Katsina Road, Katsina                   | Katsina     | Katsina |
| 3674 | KT/0070 | KT/0070/S/6  | Turai Umar Yar'Adua Maternity Children Hospital |                                           | Gidan Dawa off Hassan Usman Katsina Road, Katsina                   | Katsina     | Katsina |
| 3675 | KT/0070 | KT/0070/S/7  | Turai Umar Yar'Adua Maternity Children Hospital |                                           | Gidan Dawa off Hassan Usman Katsina Road, Katsina                   | Katsina     | Katsina |
| 3676 | KT/0070 | KT/0070/S/3  | Turai Umar Yar'Adua Maternity Children Hospital |                                           | Gidan Dawa off Hassan Usman Katsina Road, Katsina                   | Katsina     | Katsina |
| 3677 | KT/0073 | KT/0073/S/8  | General Hospital Musawa                         |                                           | Hospital Rd, Shaishawu Musawa, Katsina                              | Musawa      | Katsina |
| 3678 | KT/0073 | KT/0073/S/5  | General Hospital Musawa                         |                                           | Hospital Rd, Shaishawu Musawa, Katsina                              | Musawa      | Katsina |
| 3679 | KT/0073 | KT/0073/S/1  | General Hospital Musawa                         |                                           | Hospital Rd, Shaishawu Musawa, Katsina                              | Musawa      | Katsina |
| 3680 | KT/0073 | KT/0073/S/3  | General Hospital Musawa                         |                                           | Hospital Rd, Shaishawu Musawa, Katsina                              | Musawa      | Katsina |
| 3681 | KT/0076 | KT/0076/S/4  | Alheri Clinic                                   |                                           | Lawrence Onoja Road, Kofar Kaura, New Layout katsina, Katsina State | Katsina     | Katsina |
| 3682 | KT/0076 | KT/0076/S/2  | Alheri Clinic                                   |                                           | Lawrence Onoja Road, Kofar Kaura, New Layout katsina, Katsina State | Katsina     | Katsina |
| 3683 | KT/0076 | KT/0076/S/5  | Alheri Clinic                                   |                                           | Lawrence Onoja Road, Kofar Kaura, New Layout katsina, Katsina State | Katsina     | Katsina |
| 3684 | KT/0076 | KT/0076/S/3  | Alheri Clinic                                   |                                           | Lawrence Onoja Road, Kofar Kaura, New Layout katsina, Katsina State | Katsina     | Katsina |
| 3685 | KT/0076 | KT/0076/S/1  | Alheri Clinic                                   |                                           | Lawrence Onoja Road, Kofar Kaura, New Layout katsina, Katsina State | Katsina     | Katsina |
| 3686 | KT/0082 | KT/0082/S/7  | Katsina State Orthopaedic & Speciality Hospital |                                           | Dutsinma Road, Katsina                                              | Katsina     | Katsina |
| 3687 | KT/0082 | KT/0082/S/10 | Katsina State Orthopaedic & Speciality Hospital |                                           | Dutsinma Road, Katsina                                              | Katsina     | Katsina |
| 3688 | KT/0082 | KT/0082/S/11 | Katsina State Orthopaedic & Speciality Hospital |                                           | Dutsinma Road, Katsina                                              | Katsina     | Katsina |
| 3689 | KT/0082 | KT/0082/S/1  | Katsina State Orthopaedic & Speciality Hospital |                                           | Dutsinma Road, Katsina                                              | Katsina     | Katsina |
| 3690 | KT/0082 | KT/0082/S/5  | Katsina State Orthopaedic & Speciality Hospital |                                           | Dutsinma Road, Katsina                                              | Katsina     | Katsina |
| 3691 | KW/0001 | KW/0001/S/5  | Temitope Hospital                               |                                           | Sabo Line Isale, Off Amilegbe Road, Ilorin                          | Ilorin East | Kwara   |
| 3692 | KW/0002 | KW/0002/S/4  | Ola Olu Hospital                                |                                           | Opp. International Tobacco Coy. Garrage Offa Road, Ilorin           | Ilorin East | Kwara   |
| 3693 | KW/0002 | KW/0002/S/1  | Ola Olu Hospital                                |                                           | Opp. International Tobacco Coy. Garrage Offa Road, Ilorin           | Ilorin East | Kwara   |
| 3694 | KW/0002 | KW/0002/S/5  | Ola Olu Hospital                                |                                           | Opp. International Tobacco Coy. Garrage Offa Road, Ilorin           | Ilorin East | Kwara   |
| 3695 | KW/0002 | KW/0002/S/7  | Ola Olu Hospital                                |                                           | Opp. International Tobacco Coy. Garrage Offa Road, Ilorin           | Ilorin East | Kwara   |
| 3696 | KW/0005 | KW/0005/S/3  | Eyitayo Hospital                                |                                           | No. 40, Ojo-Iya Road, Ilorin                                        | Ilorin East | Kwara   |
| 3697 | KW/0006 | KW/0006/S/2  | Oorelope Hospital                               |                                           | No. 30, Opo-Malu Road, Ilorin, Kwara State                          | Ilorin East | Kwara   |
| 3698 | KW/0006 | KW/0006/S/4  | Oorelope Hospital                               |                                           | No. 30, Opo-Malu Road, Ilorin, Kwara State                          | Ilorin East | Kwara   |
| 3699 | KW/0006 | KW/0006/S/3  | Oorelope Hospital                               |                                           | No. 30, Opo-Malu Road, Ilorin, Kwara State                          | Ilorin East | Kwara   |
| 3700 | KW/0008 | KW/0008/S/6  | Jebba Specialist Hospital                       | Radiology, Paediatrics, Surgery, Pharmacy | Jebba, Ilorin                                                       | Patigi      | Kwara   |
| 3701 | KW/0008 | KW/0008/S/4  | Jebba Specialist Hospital                       | Radiology, Paediatrics, Surgery, Pharmacy | Jebba, Ilorin                                                       | Patigi      | Kwara   |
| 3702 | KW/0012 | KW/0012/S/3  | Olalomi Hospital - Ilorin                       |                                           | Stadium Road, Ilorin                                                | Ilorin-West | Kwara   |
| 3703 | KW/0012 | KW/0012/S/7  | Olalomi Hospital - Ilorin                       |                                           | Stadium Road, Ilorin                                                | Ilorin-West | Kwara   |

|      |         |              |                                     |                                          |                                                            |              |       |
|------|---------|--------------|-------------------------------------|------------------------------------------|------------------------------------------------------------|--------------|-------|
| 3704 | KW/0012 | KW/0012/S/1  | Olalomi Hospital - Ilorin           |                                          | Stadium Road, Ilorin                                       | Ilorin-West  | Kwara |
| 3705 | KW/0015 | KW/0015/S/5  | Omolola Hospital                    |                                          | Opp. Govt. Sec. School, Along Jebba Road, Ilorin.          | Ilorin East  | Kwara |
| 3706 | KW/0015 | KW/0015/S/7  | Omolola Hospital                    |                                          | Opp. Govt. Sec. School, Along Jebba Road, Ilorin.          | Ilorin East  | Kwara |
| 3707 | KW/0016 | KW/0016/S/5  | Omolola Hospital                    | Laboratory, Radiology                    | No. 26 Murtala Moh'd Road, Ilorin.                         | Ilorin East  | Kwara |
| 3708 | KW/0016 | KW/0016/S/7  | Omolola Hospital                    | Laboratory, Radiology                    | No. 26 Murtala Moh'd Road, Ilorin.                         | Ilorin East  | Kwara |
| 3709 | KW/0023 | KW/0023/S/4  | Sabo Specialist Hospital            | Radiology, Laboratory, Pharmacy          | Alagbado Okelele, Ilorin                                   | Patigi       | Kwara |
| 3710 | KW/0023 | KW/0023/S/7  | Sabo Specialist Hospital            | Radiology, Laboratory, Pharmacy          | Alagbado Okelele, Ilorin                                   | Patigi       | Kwara |
| 3711 | KW/0023 | KW/0023/S/5  | Sabo Specialist Hospital            | Radiology, Laboratory, Pharmacy          | Alagbado Okelele, Ilorin                                   | Patigi       | Kwara |
| 3712 | KW/0024 | KW/0024/S/1  | Olarewaju Hospital                  |                                          | Oro Ago Close Ilorin                                       | Ilorin-South | Kwara |
| 3713 | KW/0024 | KW/0024/S/3  | Olarewaju Hospital                  |                                          | Oro Ago Close Ilorin                                       | Ilorin-South | Kwara |
| 3714 | KW/0024 | KW/0024/S/5  | Olarewaju Hospital                  |                                          | Oro Ago Close Ilorin                                       | Ilorin-South | Kwara |
| 3715 | KW/0026 | KW/0026/S/4  | Offa Specialist Hospital            | Radiology, Pharmacy, Laboratory, Surgery | Offa                                                       | Patigi       | Kwara |
| 3716 | KW/0026 | KW/0026/S/1  | Offa Specialist Hospital            | Radiology, Pharmacy, Laboratory, Surgery | Offa                                                       | Patigi       | Kwara |
| 3717 | KW/0026 | KW/0026/S/7  | Offa Specialist Hospital            | Radiology, Pharmacy, Laboratory, Surgery | Offa                                                       | Patigi       | Kwara |
| 3718 | KW/0026 | KW/0026/S/5  | Offa Specialist Hospital            | Radiology, Pharmacy, Laboratory, Surgery | Offa                                                       | Patigi       | Kwara |
| 3719 | KW/0027 | KW/0027/S/12 | University Teaching Hospital Ilorin |                                          | Ilorin, Lagos Road, Ilorin                                 | Ilorin East  | Kwara |
| 3720 | KW/0027 | KW/0027/S/4  | University Teaching Hospital Ilorin |                                          | Ilorin, Lagos Road, Ilorin                                 | Ilorin East  | Kwara |
| 3721 | KW/0027 | KW/0027/S/6  | University Teaching Hospital Ilorin |                                          | Ilorin, Lagos Road, Ilorin                                 | Ilorin East  | Kwara |
| 3722 | KW/0027 | KW/0027/S/15 | University Teaching Hospital Ilorin |                                          | Ilorin, Lagos Road, Ilorin                                 | Ilorin East  | Kwara |
| 3723 | KW/0027 | KW/0027/S/7  | University Teaching Hospital Ilorin |                                          | Ilorin, Lagos Road, Ilorin                                 | Ilorin East  | Kwara |
| 3724 | KW/0027 | KW/0027/S/11 | University Teaching Hospital Ilorin |                                          | Ilorin, Lagos Road, Ilorin                                 | Ilorin East  | Kwara |
| 3725 | KW/0027 | KW/0027/S/5  | University Teaching Hospital Ilorin |                                          | Ilorin, Lagos Road, Ilorin                                 | Ilorin East  | Kwara |
| 3726 | KW/0027 | KW/0027/S/10 | University Teaching Hospital Ilorin |                                          | Ilorin, Lagos Road, Ilorin                                 | Ilorin East  | Kwara |
| 3727 | KW/0027 | KW/0027/S/3  | University Teaching Hospital Ilorin |                                          | Ilorin, Lagos Road, Ilorin                                 | Ilorin East  | Kwara |
| 3728 | KW/0027 | KW/0027/S/2  | University Teaching Hospital Ilorin |                                          | Ilorin, Lagos Road, Ilorin                                 | Ilorin East  | Kwara |
| 3729 | KW/0027 | KW/0027/S/1  | University Teaching Hospital Ilorin |                                          | Ilorin, Lagos Road, Ilorin                                 | Ilorin East  | Kwara |
| 3730 | KW/0029 | KW/0029/S/3  | Oyin Folorunsho                     |                                          | Tanke Bubu Off University Road, Ilorin                     | Ilorin East  | Kwara |
| 3731 | KW/0031 | KW/0031/S/1  | Aisat Memorial Hospital             |                                          | Off. Jaigbade Residence, Itamerin, Ilorin                  | Ilorin East  | Kwara |
| 3732 | KW/0032 | KW/0032/S/7  | General Hospital, Omuaran           |                                          | Omuaran                                                    | Irepodun     | Kwara |
| 3733 | KW/0032 | KW/0032/S/4  | General Hospital, Omuaran           |                                          | Omuaran                                                    | Irepodun     | Kwara |
| 3734 | KW/0038 | KW/0038/S/1  | Kiddiz Clinic                       |                                          | Eastern Reservoirs, Olorunshogo, Ilorin                    | Ilorin East  | Kwara |
| 3735 | KW/0038 | KW/0038/S/6  | Kiddiz Clinic                       |                                          | Eastern Reservoirs, Olorunshogo, Ilorin                    | Ilorin East  | Kwara |
| 3736 | KW/0039 | KW/0039/S/3  | Sadiku Hospital                     |                                          | 16, Abdulwahab Folawuyo, Unity Road, Ilorin                | Ilorin-South | Kwara |
| 3737 | KW/0039 | KW/0039/S/1  | Sadiku Hospital                     |                                          | 16, Abdulwahab Folawuyo, Unity Road, Ilorin                | Ilorin-South | Kwara |
| 3738 | KW/0049 | KW/0049/S/11 | Ela Memorial Medical Centre         |                                          | Near Basin Gate, Ilorin                                    | Ilorin-South | Kwara |
| 3739 | KW/0051 | KW/0051/S/3  | Surulere Medical Centre             |                                          | Off Taiwo Road, Ilorin                                     | Ilorin East  | Kwara |
| 3740 | KW/0052 | KW/0052/S/3  | Kosemani Hospital                   |                                          | Emirs Road, Ilorin                                         | Ilorin East  | Kwara |
| 3741 | KW/0052 | KW/0052/S/14 | Kosemani Hospital                   |                                          | Emirs Road, Ilorin                                         | Ilorin East  | Kwara |
| 3742 | KW/0060 | KW/0060/S/4  | Dave Mercy Pharmacy                 | Pharmacy                                 | Jebba, Idiagbon Nigeria Paper Road, Adjacent Hotel, Jebba. | Moro         | Kwara |
| 3743 | KW/0061 | KW/0061/S/3  | Olarewaju Hospital Lab              | Laboratory, Surgery, O & G.              | Oro Ago Close, Ilorin                                      | Ilorin East  | Kwara |

|      |         |              |                                      |                                     |                                                                         |              |       |
|------|---------|--------------|--------------------------------------|-------------------------------------|-------------------------------------------------------------------------|--------------|-------|
| 3744 | KW/0061 | KW/0061/S/1  | Olarewaju Hospital Lab               | Laboratory, Surgery, O & G.         | Oro Ago Close, Ilorin                                                   | Ilorin East  | Kwara |
| 3745 | KW/0061 | KW/0061/S/5  | Olarewaju Hospital Lab               | Laboratory, Surgery, O & G.         | Oro Ago Close, Ilorin                                                   | Ilorin East  | Kwara |
| 3746 | KW/0063 | KW/0063/S    | Ola-Olu Hospital                     | Laboratory, Radiology, Pharmacy     | Opposite Int. Tobacco Coy, Garrage Offa Road, Ilorin                    | Ilorin-South | Kwara |
| 3747 | KW/0064 | KW/0064/S/7  | Akande X-ray Diagnostic              | Radiology                           | No.4, Sultan Road, Ilorin                                               | Ilorin-South | Kwara |
| 3748 | KW/0065 | KW/0065/S/8  | Heritage Dental Clinic               | Dental                              | 16, Ibrahim Taiwo Road, Ilorin                                          | Ilorin East  | Kwara |
| 3749 | KW/0067 | KW/0067/S/1  | Olalomi Hospital                     | Radiology, Surgery, O&G             | Old Yidi Road, Behind Ansarudeen Primary Sch., Ilorin                   | Ilorin-West  | Kwara |
| 3750 | KW/0067 | KW/0067/S/3  | Olalomi Hospital                     | Radiology, Surgery, O&G             | Old Yidi Road, Behind Ansarudeen Primary Sch., Ilorin                   | Ilorin-West  | Kwara |
| 3751 | KW/0067 | KW/0067/S/7  | Olalomi Hospital                     | Radiology, Surgery, O&G             | Old Yidi Road, Behind Ansarudeen Primary Sch., Ilorin                   | Ilorin-West  | Kwara |
| 3752 | KW/0069 | KW/0069/S/8  | Alpha Dental Clinic                  | Dental                              | 116, Abdulazeez Atta Road, Ilorin                                       | Ilorin-West  | Kwara |
| 3753 | KW/0073 | KW/0073/S/4  | Mosaj Pharmacy                       | Pharmacy                            | Behind Queen School, Off CUTH, Ilorin                                   | Ilorin-West  | Kwara |
| 3754 | KW/0074 | KW/0074/S/4  | Coby Pharmacy                        | Pharmacy                            | 6, NNPC Pipeline Road, Tanke-GRA, Ilorin                                | Patigi       | Kwara |
| 3755 | KW/0075 | KW/0075/S/4  | Fiolu Pharm. Ltd.                    | Pharmacy                            | G. 127, Isale Gambari Road, Ilorin                                      | Ilorin East  | Kwara |
| 3756 | KW/0076 | KW/0076/S/4  | Momrota Pharmacy                     | Pharmacy                            | 116/117, Abdulazeez Atta Road, Surulere, Adjacent UITH.                 | Ilorin-West  | Kwara |
| 3757 | KW/0082 | KW/0082/S/4  | Folajaiye Diagnostic Medical Lab.    | Laboratory                          | Services, 120 Ibrahim Taiwo Road, Ilorin                                | Patigi       | Kwara |
| 3758 | KW/0083 | KW/0083/S/4  | Ajeigbe Diagnostic Services Centre   | Laboratory                          | Opp. Specialist Hospital, Offa                                          | Offa         | Kwara |
| 3759 | KW/0091 | KW/0091/S/12 | Garin Alimi Hospital                 |                                     | 283, Umaru Saro Road, Ilorin                                            | Ilorin-South | Kwara |
| 3760 | KW/0091 | KW/0091/S/4  | Garin Alimi Hospital                 |                                     | 283, Umaru Saro Road, Ilorin                                            | Ilorin-South | Kwara |
| 3761 | KW/0091 | KW/0091/S/5  | Garin Alimi Hospital                 |                                     | 283, Umaru Saro Road, Ilorin                                            | Ilorin-South | Kwara |
| 3762 | KW/0091 | KW/0091/S/15 | Garin Alimi Hospital                 |                                     | 283, Umaru Saro Road, Ilorin                                            | Ilorin-South | Kwara |
| 3763 | KW/0091 | KW/0091/S/7  | Garin Alimi Hospital                 |                                     | 283, Umaru Saro Road, Ilorin                                            | Ilorin-South | Kwara |
| 3764 | KW/0091 | KW/0091/S/3  | Garin Alimi Hospital                 |                                     | 283, Umaru Saro Road, Ilorin                                            | Ilorin-South | Kwara |
| 3765 | KW/0094 | KW/0094/S/5  | University of Ilorin Health Centre   |                                     | Ilorin, Kwara State                                                     | Ilorin-South | Kwara |
| 3766 | KW/0094 | KW/0094/S/4  | University of Ilorin Health Centre   |                                     | Ilorin, Kwara State                                                     | Ilorin-South | Kwara |
| 3767 | KW/0101 | KW/0101/S/4  | Sarfam Medical Centre                |                                     | No 34 Fate Rd, Ilorin                                                   | Ilorin East  | Kwara |
| 3768 | KW/0111 | KW/0111/S/3  | Royal Care Hospital                  |                                     | No 1 Ponyan Rd NNPC Pipeline Gaa-Akanbi Ilorin                          | Ilorin-South | Kwara |
| 3769 | KW/0113 | KW/0113/S/7  | General Hospital Lafiagi             |                                     | General Hospital Lafiagi                                                | Edu          | Kwara |
| 3770 | KW/0114 | KW/0114/S/5  | General Hospital Kiama               |                                     | General Hospital Kiama                                                  | Kaiama       | Kwara |
| 3771 | KW/0114 | KW/0114/S/1  | General Hospital Kiama               |                                     | General Hospital Kiama                                                  | Kaiama       | Kwara |
| 3772 | KW/0117 | KW/0117/S/4  | Odeme Pharmacy                       | Pharmacy                            | Ahmadu Bello Way Opp Kwara Hotel Ilorin                                 | Ilorin-South | Kwara |
| 3773 | KW/0118 | KW/0118/S    | Gbolafunmi Pharmaceutical Chemist    | Pharmacy                            | Amilegbu Rd Ilorin                                                      | Ilorin East  | Kwara |
| 3774 | KW/0122 | KW/0122/S/4  | Ilera Pharmaceutical Chemist Nig Ltd | Pharmacy                            | 113 abdullazees Rd Ilorin                                               | Ilorin-West  | Kwara |
| 3775 | KW/0125 | KW/0125/S/11 | Ela Memorial Centre                  | orthopaedic Surgery & Physiotherapy | Shittu Olufoye Street, Off Lower Niger River Basin Gate Basin Rd Ilorin | Ilorin East  | Kwara |
| 3776 | KW/0126 | KW/0126/S/11 | Oleb Physiotherapy                   | Physiotherapy                       | No 19 Unity Rd Ilorin                                                   | Ilorin-South | Kwara |
| 3777 | KW/0129 | KW/0129/S/5  | Unity Medical Laboratory Services    | Laboratory                          | 120 B Sheikh Adam Abdullahi Street Ipata Oloje Ilorin                   | Ilorin-West  | Kwara |
| 3778 | KW/0130 | KW/0130/S/16 | Femis Laboratory                     | Laboratory, ECG & Uss               | No 4 Unity Rd Ilorin                                                    | Ilorin-South | Kwara |
| 3779 | KW/0130 | KW/0130/S/5  | Femis Laboratory                     | Laboratory, ECG & Uss               | No 4 Unity Rd Ilorin                                                    | Ilorin-South | Kwara |
| 3780 | KW/0130 | KW/0130/S/14 | Femis Laboratory                     | Laboratory, ECG & Uss               | No 4 Unity Rd Ilorin                                                    | Ilorin-South | Kwara |
| 3781 | KW/0138 | KW/0138/S/5  | CIVIL SERVICE HOSPITAL               |                                     | ILOFA ROAD, ILORIN                                                      | Ilorin-South | Kwara |
| 3782 | KW/0139 | KW/0139/S/5  | General Hospital, Share              |                                     | Share                                                                   | Irepedun     | Kwara |
| 3783 | KW/0140 | KW/0140/S/4  | UITH COMPREHENSIVE HEALTH CENTRE     |                                     | ESIE                                                                    | Irepedun     | Kwara |

|      |         |              |                                    |               |                                                                                        |              |       |
|------|---------|--------------|------------------------------------|---------------|----------------------------------------------------------------------------------------|--------------|-------|
| 3784 | KW/0144 | KW/0144/S/5  | OLUTAYO CLINIC & MATERNITY         |               | SANGO, ILORIN                                                                          | Ilorin East  | Kwara |
| 3785 | KW/0146 | KW/0146/S/9  | OMOSEBI HOSPITAL                   |               | GAA AKAMBI ILORIN                                                                      | Ilorin-South | Kwara |
| 3786 | KW/0147 | KW/0147/S/6  | CHILDREN SPECIALIST HOSP.          |               | CENTRE GBORO                                                                           | Ilorin-West  | Kwara |
| 3787 | KW/0147 | KW/0147/S/5  | CHILDREN SPECIALIST HOSP.          |               | CENTRE GBORO                                                                           | Ilorin-West  | Kwara |
| 3788 | KW/0151 | KW/0151/S/5  | TEMITOPE HOSPITAL                  | Laboratory    | 3B, AMILEGBO SABO LINE, ILORIN                                                         | Ilorin East  | Kwara |
| 3789 | KW/0154 | KW/0154/S/15 | AYO BELLO MEM. EYE CENTRE          | Ophthalmology | 1 AYO BELLO STR, BEHIND WINNER CHAPEL ILORIN                                           | Ilorin-West  | Kwara |
| 3790 | KW/0155 | KW/0155/S/5  | COMPREHENSIVE HEALTH CENTRE        | Laboratory    | IREPODUN                                                                               | Surulere     | Lagos |
| 3791 | KW/0156 | KW/0156/S/5  | Anchormed Hospital                 | Laboratory    | 195 AJASSE IPO RD,                                                                     | Ilorin-West  | Kwara |
| 3792 | KW/0159 | KW/0159/S/8  | GOVERNMENT DENTAL CENTRE           | DENTAL        | UITH PREMISES                                                                          | Ilorin-West  | Kwara |
| 3793 | KW/0165 | KW/0165/S/5  | Dayspring Medical Centre           | Laboratory    | Beside Agape, Unilorin Remedial Centre, Ilorin                                         | Ilorin-South | Kwara |
| 3794 | KW/0167 | KW/0167/S/4  | Ayobami Pharmacy Co                | Pharmacy      | Basin Road, Ilorin                                                                     | Ilorin-South | Kwara |
| 3795 | KW/0172 | KW/0172/S/7  | Albarka Radiodiagnostic Centre     |               | Off Ajase Epo Road, Ilorin                                                             | Ilorin East  | Kwara |
| 3796 | KW/0176 | KW/0176/S/1  | Crescent Gold Crown Hospital       |               | Behind Mark Petrol Station, Tanke, Ilorin                                              | Ilorin-South | Kwara |
| 3797 | KW/0176 | KW/0176/S/6  | Crescent Gold Crown Hospital       |               | Behind Mark Petrol Station, Tanke, Ilorin                                              | Ilorin-South | Kwara |
| 3798 | KW/0176 | KW/0176/S/3  | Crescent Gold Crown Hospital       |               | Behind Mark Petrol Station, Tanke, Ilorin                                              | Ilorin-South | Kwara |
| 3799 | KW/0177 | KW/0177/S/8  | 22 BDE MC, Ilorin                  |               | 22 Brigade, Sobi Barracks, Ilorin, Kwara state                                         | Ilorin East  | Kwara |
| 3800 | KW/0177 | KW/0177/S/5  | 22 BDE MC, Ilorin                  |               | 22 Brigade, Sobi Barracks, Ilorin, Kwara state                                         | Ilorin East  | Kwara |
| 3801 | KW/0178 | KW/0178/S/4  | Oko Medical Centre                 |               | Idofin Road, Oko                                                                       | Irepodun     | Kwara |
| 3802 | KW/0178 | KW/0178/S/7  | Oko Medical Centre                 |               | Idofin Road, Oko                                                                       | Irepodun     | Kwara |
| 3803 | KW/0178 | KW/0178/S/5  | Oko Medical Centre                 |               | Idofin Road, Oko                                                                       | Irepodun     | Kwara |
| 3804 | KW/0190 | KW/0190/S/4  | Landmark University Medical Centre |               | Landmark University, Omuaran, Kwara State                                              | Irepodun     | Kwara |
| 3805 | KW/0190 | KW/0190/S/15 | Landmark University Medical Centre |               | Landmark University, Omuaran, Kwara State                                              | Irepodun     | Kwara |
| 3806 | KW/0190 | KW/0190/S/5  | Landmark University Medical Centre |               | Landmark University, Omuaran, Kwara State                                              | Irepodun     | Kwara |
| 3807 | KW/0190 | KW/0190/S/3  | Landmark University Medical Centre |               | Landmark University, Omuaran, Kwara State                                              | Irepodun     | Kwara |
| 3808 | KW/0190 | KW/0190/S/7  | Landmark University Medical Centre |               | Landmark University, Omuaran, Kwara State                                              | Irepodun     | Kwara |
| 3809 | KW/0191 | KW/0191/S/14 | Notre Dame Medical Centre          |               | Along Kabba Kajola Road, Amoyo Town, Kwara State                                       | Ifelodun     | Kwara |
| 3810 | KW/0198 | KW/0198/S/1  | Yusjib Industrial Medicare         |               | 35, Ajase Ipo Road, (opposite Oando filling station, offa garage), Ilorin, Kwara State | Ilorin-South | Kwara |
| 3811 | KW/0198 | KW/0198/S/3  | Yusjib Industrial Medicare         |               | 35, Ajase Ipo Road, (opposite Oando filling station, offa garage), Ilorin, Kwara State | Ilorin-South | Kwara |
| 3812 | KW/0199 | KW/0199/S/3  | Midland Fertility Center           |               | 12 Kano Road, Adewole Estate, Ilorin, Kwara State                                      | Ilorin-West  | Kwara |
| 3813 | KW/0206 | KW/0206/S/5  | Kwara Advanced Diagnostic center   |               | Along Asa Dam Road, By New Yidi Road Junction, Ilorin, Kwara State                     | Ilorin-West  | Kwara |
| 3814 | KW/0206 | KW/0206/S/7  | Kwara Advanced Diagnostic center   |               | Along Asa Dam Road, By New Yidi Road Junction, Ilorin, Kwara State                     | Ilorin-West  | Kwara |
| 3815 | KW/0209 | KW/0209/S/3  | Group Medical Centre               |               | Pipeline Road, Tanke Ilorin, Kwara State.                                              | Ilorin-South | Kwara |
| 3816 | KW/0213 | KW/0213/S/1  | Akanji Memorial Hospital           |               | 136 Sobi Road Ilorin, Kwara State                                                      | Ilorin East  | Kwara |
| 3817 | KW/0213 | KW/0213/S/3  | Akanji Memorial Hospital           |               | 136 Sobi Road Ilorin, Kwara State                                                      | Ilorin East  | Kwara |
| 3818 | KW/0214 | KW/0214/S/12 | General Hospital Ilorin            |               | Abdulazeez Attah Road Ilorin, Kwara State                                              | Ilorin-West  | Kwara |
| 3819 | KW/0214 | KW/0214/S/15 | General Hospital Ilorin            |               | Abdulazeez Attah Road Ilorin, Kwara State                                              | Ilorin-West  | Kwara |
| 3820 | KW/0214 | KW/0214/S/1  | General Hospital Ilorin            |               | Abdulazeez Attah Road Ilorin, Kwara State                                              | Ilorin-West  | Kwara |
| 3821 | KW/0214 | KW/0214/S/3  | General Hospital Ilorin            |               | Abdulazeez Attah Road Ilorin, Kwara State                                              | Ilorin-West  | Kwara |
| 3822 | KW/0214 | KW/0214/S/4  | General Hospital Ilorin            |               | Abdulazeez Attah Road Ilorin, Kwara State                                              | Ilorin-West  | Kwara |
| 3823 | KW/0214 | KW/0214/S/9  | General Hospital Ilorin            |               | Abdulazeez Attah Road Ilorin, Kwara State                                              | Ilorin-West  | Kwara |
| 3824 | KW/0214 | KW/0214/S/5  | General Hospital Ilorin            |               | Abdulazeez Attah Road Ilorin, Kwara State                                              | Ilorin-West  | Kwara |
| 3825 | KW/0214 | KW/0214/S/8  | General Hospital Ilorin            |               | Abdulazeez Attah Road Ilorin, Kwara State                                              | Ilorin-West  | Kwara |

|      |         |              |                                     |                     |                                                       |                  |       |
|------|---------|--------------|-------------------------------------|---------------------|-------------------------------------------------------|------------------|-------|
| 3826 | KW/0214 | KW/0214/S/7  | General Hospital Ilorin             |                     | Abdulazeez Attah Road Ilorin, Kwara State             | Ilorin-West      | Kwara |
| 3827 | KW/0214 | KW/0214/S/6  | General Hospital Ilorin             |                     | Abdulazeez Attah Road Ilorin, Kwara State             | Ilorin-West      | Kwara |
| 3828 | KW/0214 | KW/0214/S/2  | General Hospital Ilorin             |                     | Abdulazeez Attah Road Ilorin, Kwara State             | Ilorin-West      | Kwara |
| 3829 | LA/0002 | LA/0002/S/2  | Talent Specialist Hospital          |                     | Plot 440 4th Avenue, Gowon Estate, Egbeda, Lagos      | Agege            | Lagos |
| 3830 | LA/0010 | LA/0010/S/7  | Osuntuyi Medical Center, iju_ishaga |                     | 255 Iju Rd, Balogun B/Stop, Iju-Ishaga                | Agege            | Lagos |
| 3831 | LA/0010 | LA/0010/S/1  | Osuntuyi Medical Center, iju_ishaga |                     | 255 Iju Rd, Balogun B/Stop, Iju-Ishaga                | Agege            | Lagos |
| 3832 | LA/0010 | LA/0010/S/8  | Osuntuyi Medical Center, iju_ishaga |                     | 255 Iju Rd, Balogun B/Stop, Iju-Ishaga                | Agege            | Lagos |
| 3833 | LA/0010 | LA/0010/S/6  | Osuntuyi Medical Center, iju_ishaga |                     | 255 Iju Rd, Balogun B/Stop, Iju-Ishaga                | Agege            | Lagos |
| 3834 | LA/0010 | LA/0010/S/5  | Osuntuyi Medical Center, iju_ishaga |                     | 255 Iju Rd, Balogun B/Stop, Iju-Ishaga                | Agege            | Lagos |
| 3835 | LA/0010 | LA/0010/S/4  | Osuntuyi Medical Center, iju_ishaga |                     | 255 Iju Rd, Balogun B/Stop, Iju-Ishaga                | Agege            | Lagos |
| 3836 | LA/0010 | LA/0010/S/3  | Osuntuyi Medical Center, iju_ishaga |                     | 255 Iju Rd, Balogun B/Stop, Iju-Ishaga                | Agege            | Lagos |
| 3837 | LA/0010 | LA/0010/S/2  | Osuntuyi Medical Center, iju_ishaga |                     | 255 Iju Rd, Balogun B/Stop, Iju-Ishaga                | Agege            | Lagos |
| 3838 | LA/0012 | LA/0012/S/1  | General Hospital, Orile-Agege       | -                   | Orile-Agege                                           | Agege            | Lagos |
| 3839 | LA/0012 | LA/0012/S/8  | General Hospital, Orile-Agege       | -                   | Orile-Agege                                           | Agege            | Lagos |
| 3840 | LA/0012 | LA/0012/S/7  | General Hospital, Orile-Agege       | -                   | Orile-Agege                                           | Agege            | Lagos |
| 3841 | LA/0012 | LA/0012/S/2  | General Hospital, Orile-Agege       | -                   | Orile-Agege                                           | Agege            | Lagos |
| 3842 | LA/0012 | LA/0012/S/3  | General Hospital, Orile-Agege       | -                   | Orile-Agege                                           | Agege            | Lagos |
| 3843 | LA/0017 | LA/0017/S/1  | Mucas Hospital                      |                     | 19 Ogun Str., Adeolu Bus Stop, Dopemu, Agege, Lagos.  | Agege            | Lagos |
| 3844 | LA/0017 | LA/0017/S/3  | Mucas Hospital                      |                     | 19 Ogun Str., Adeolu Bus Stop, Dopemu, Agege, Lagos.  | Agege            | Lagos |
| 3845 | LA/0019 | LA/0019/S/4  | Teo Pharmaceutical Nigeria Ltd.     | Pharmacy            | 172, Akowonjo Road, Akowonjo                          | Alimosho         | Lagos |
| 3846 | LA/0021 | LA/0021/S/1  | Fruitful Vine Pharmacy              | Pharmacy            | 115, Idimu Road, Egbeda                               | Alimosho         | Lagos |
| 3847 | LA/0022 | LA/0022/S/4  | Lola Pharmacy & Stores Ltd.         | Pharmacy            | 10, Idimu Road, Egeda Bus Stop Egbeda                 | Alimosho         | Lagos |
| 3848 | LA/0023 | LA/0023/S/4  | Boluke Pharm. Ltd                   | Pharmacy            | 69, Old Abeokuta                                      | Alimosho         | Lagos |
| 3849 | LA/0024 | LA/0024/S/4  | Boluke Pharm. Ltd                   | Pharmacy            | 16 Iju Road, Agege, Lagos                             | Agege            | Lagos |
| 3850 | LA/0025 | LA/0025/S/4  | Bolutife Pharmacy & Stores Ltd.     | Pharmacy            | 104, Ijagemo Road Ijegun Garrage, Ijegun, Lagos       | Lagos Mainland   | Lagos |
| 3851 | LA/0029 | LA/0029/S/4  | Edimot Pharmacy                     | Pharmacy            | 103/107 Old Otta rd, Orile Agege                      | Agege            | Lagos |
| 3852 | LA/0033 | LA/0033/S/7  | Newton Diagnostic Services Ltd.     | Radiology           | 19 Ogun Street, Adeolu Bus Stop, Dopemu               | Alimosho         | Lagos |
| 3853 | LA/0034 | LA/0034/S/10 | Dr.Essien I. Ekong Hospital         | Orthopedric Surgery | 1, Kemfat Road, Thomas Village, Ajah.                 | Agege            | Lagos |
| 3854 | LA/0036 | LA/0036/S/5  | Ajeromi General Hospital            |                     | Awodi-Ora Ajegunle                                    | Ajeromi/Ifelodun | Lagos |
| 3855 | LA/0036 | LA/0036/S/1  | Ajeromi General Hospital            |                     | Awodi-Ora Ajegunle                                    | Ajeromi/Ifelodun | Lagos |
| 3856 | LA/0036 | LA/0036/S/3  | Ajeromi General Hospital            |                     | Awodi-Ora Ajegunle                                    | Ajeromi/Ifelodun | Lagos |
| 3857 | LA/0036 | LA/0036/S/8  | Ajeromi General Hospital            |                     | Awodi-Ora Ajegunle                                    | Ajeromi/Ifelodun | Lagos |
| 3858 | LA/0036 | LA/0036/S/4  | Ajeromi General Hospital            |                     | Awodi-Ora Ajegunle                                    | Ajeromi/Ifelodun | Lagos |
| 3859 | LA/0036 | LA/0036/S/2  | Ajeromi General Hospital            |                     | Awodi-Ora Ajegunle                                    | Ajeromi/Ifelodun | Lagos |
| 3860 | LA/0036 | LA/0036/S/11 | Ajeromi General Hospital            |                     | Awodi-Ora Ajegunle                                    | Ajeromi/Ifelodun | Lagos |
| 3861 | LA/0037 | LA/0037/S/5  | Prince & Princess Hospital          |                     | 191 Ojo Road, Ligoli Bus Stop, Ajegunle, Lagos.       | Ajeromi/Ifelodun | Lagos |
| 3862 | LA/0037 | LA/0037/S/2  | Prince & Princess Hospital          |                     | 191 Ojo Road, Ligoli Bus Stop, Ajegunle, Lagos.       | Ajeromi/Ifelodun | Lagos |
| 3863 | LA/0037 | LA/0037/S/4  | Prince & Princess Hospital          |                     | 191 Ojo Road, Ligoli Bus Stop, Ajegunle, Lagos.       | Ajeromi/Ifelodun | Lagos |
| 3864 | LA/0038 | LA/0038/S/1  | All Soul's Clinics Ltd              |                     | No. 235 Ojo Road, Ajegunle, Lagos                     | Ajeromi/Ifelodun | Lagos |
| 3865 | LA/0038 | LA/0038/S/7  | All Soul's Clinics Ltd              |                     | No. 235 Ojo Road, Ajegunle, Lagos                     | Ajeromi/Ifelodun | Lagos |
| 3866 | LA/0045 | LA/0045/S/2  | Broad Hospital & Materinty          |                     | 17 Fehintola Street , Off Isijola Street Ikotun Lagos | Alimosho         | Lagos |
| 3867 | LA/0045 | LA/0045/S/6  | Broad Hospital & Materinty          |                     | 17 Fehintola Street , Off Isijola Street Ikotun Lagos | Alimosho         | Lagos |
| 3868 | LA/0045 | LA/0045/S/5  | Broad Hospital & Materinty          |                     | 17 Fehintola Street , Off Isijola Street Ikotun Lagos | Alimosho         | Lagos |

|      |         |              |                                                |            |                                                                                         |              |       |
|------|---------|--------------|------------------------------------------------|------------|-----------------------------------------------------------------------------------------|--------------|-------|
| 3869 | LA/0045 | LA/0045/S/1  | Broad Hospital & Materinty                     |            | 17 Fehintola Street , Off Isijola Street Ikotun Lagos                                   | Alimosho     | Lagos |
| 3870 | LA/0045 | LA/0045/S/3  | Broad Hospital & Materinty                     |            | 17 Fehintola Street , Off Isijola Street Ikotun Lagos                                   | Alimosho     | Lagos |
| 3871 | LA/0047 | LA/0047/S/5  | Veta Hospital Ltd.                             |            | 1, Veta Close, Araromi Bus Stop Abeokuta Expressway Iyana-Paja Lagos                    | Alimosho     | Lagos |
| 3872 | LA/0047 | LA/0047/S/4  | Veta Hospital Ltd.                             |            | 1, Veta Close, Araromi Bus Stop Abeokuta Expressway Iyana-Paja Lagos                    | Alimosho     | Lagos |
| 3873 | LA/0049 | LA/0049/S/5  | Duramo- Moses, Lab.Diag. Services & Co.        | Laboratory | 79/81 Almosho Road, Agege                                                               | Agege        | Lagos |
| 3874 | LA/0055 | LA/0055/S/4  | Malgoz Clnical Lab. Ltd.                       | Pharmacy   | 1, Akanbi Soetan St/Old Ojo Road Ajakija B/Stop. Amuwo-Odofi                            | Amuwo-Odofin | Lagos |
| 3875 | LA/0057 | LA/0057/S/12 | Shepherd Specialist Hospital                   |            | 2nd Avenue 23 Road, T Close House 38, Festac , Lagos                                    | Amuwo-Odofin | Lagos |
| 3876 | LA/0057 | LA/0057/S/3  | Shepherd Specialist Hospital                   |            | 2nd Avenue 23 Road, T Close House 38, Festac , Lagos                                    | Amuwo-Odofin | Lagos |
| 3877 | LA/0057 | LA/0057/S/2  | Shepherd Specialist Hospital                   |            | 2nd Avenue 23 Road, T Close House 38, Festac , Lagos                                    | Amuwo-Odofin | Lagos |
| 3878 | LA/0057 | LA/0057/S/1  | Shepherd Specialist Hospital                   |            | 2nd Avenue 23 Road, T Close House 38, Festac , Lagos                                    | Amuwo-Odofin | Lagos |
| 3879 | LA/0057 | LA/0057/S/6  | Shepherd Specialist Hospital                   |            | 2nd Avenue 23 Road, T Close House 38, Festac , Lagos                                    | Amuwo-Odofin | Lagos |
| 3880 | LA/0061 | LA/0061/S/7  | Praise Medical Centre, Festac.                 |            | 3rd Avenue O" Close House 2, Festac Town, Lagos.                                        | Amuwo-Odofin | Lagos |
| 3881 | LA/0061 | LA/0061/S/11 | Praise Medical Centre, Festac.                 |            | 3rd Avenue O" Close House 2, Festac Town, Lagos.                                        | Amuwo-Odofin | Lagos |
| 3882 | LA/0061 | LA/0061/S/1  | Praise Medical Centre, Festac.                 |            | 3rd Avenue O" Close House 2, Festac Town, Lagos.                                        | Amuwo-Odofin | Lagos |
| 3883 | LA/0061 | LA/0061/S/6  | Praise Medical Centre, Festac.                 |            | 3rd Avenue O" Close House 2, Festac Town, Lagos.                                        | Amuwo-Odofin | Lagos |
| 3884 | LA/0061 | LA/0061/S/3  | Praise Medical Centre, Festac.                 |            | 3rd Avenue O" Close House 2, Festac Town, Lagos.                                        | Amuwo-Odofin | Lagos |
| 3885 | LA/0061 | LA/0061/S/5  | Praise Medical Centre, Festac.                 |            | 3rd Avenue O" Close House 2, Festac Town, Lagos.                                        | Amuwo-Odofin | Lagos |
| 3886 | LA/0062 | LA/0062/S/3  | St. Anthony's Medical Centre                   |            | 19 Badagry Expressway, Festac Town, Lagos                                               | Amuwo-Odofin | Lagos |
| 3887 | LA/0062 | LA/0062/S/1  | St. Anthony's Medical Centre                   |            | 19 Badagry Expressway, Festac Town, Lagos                                               | Amuwo-Odofin | Lagos |
| 3888 | LA/0062 | LA/0062/S/5  | St. Anthony's Medical Centre                   |            | 19 Badagry Expressway, Festac Town, Lagos                                               | Amuwo-Odofin | Lagos |
| 3889 | LA/0063 | LA/0063/S/5  | Hova's Place Hospital & Clinic                 |            | House 23, T Close, 5th Avenue, Festac Town, Lagos                                       | Amuwo-Odofin | Lagos |
| 3890 | LA/0063 | LA/0063/S/15 | Hova's Place Hospital & Clinic                 |            | House 23, T Close, 5th Avenue, Festac Town, Lagos                                       | Amuwo-Odofin | Lagos |
| 3891 | LA/0069 | LA/0069/S/4  | Oxpharm Specialities Ltd.                      | Pharmacy   | 32 Road, By 3rd Avenue, Festac Town                                                     | Amuwo-Odofin | Lagos |
| 3892 | LA/0070 | LA/0070/S/4  | Davtin Pharmacy & Stores                       | Pharmacy   | 21 Road, G Close, House 2, Festac                                                       | Amuwo-Odofin | Lagos |
| 3893 | LA/0071 | LA/0071/S/4  | Mak-Mach Ltd.                                  | Pharmacy   | No 1, Frank Ojadi Close, Opp Golden Park Estate, Ogidan, Lekki - Epe Express way, Lagos | Amuwo-Odofin | Lagos |
| 3894 | LA/0073 | LA/0073/S/4  | West End Pharmacy Ltd.                         | Pharmacy   | Snow Flakes Plaza, Suite3, 311 Road F Close Festac Town                                 | Amuwo-Odofin | Lagos |
| 3895 | LA/0074 | LA/0074/S/4  | Klemzy Pharmaceutical & Allied Products Ltd.   | Pharmacy   | 5th Ave, F Close, Festac Town                                                           | Amuwo-Odofin | Lagos |
| 3896 | LA/0075 | LA/0075/S/4  | Whiteood Pharmaceutical & Allied Products Ltd. | Pharmacy   | 2nd Ave. 22 Road b/w & F Close(opp FHA water works) Festac                              | Amuwo-Odofin | Lagos |
| 3897 | LA/0076 | LA/0076/S/5  | Pharm Care Support Services Ltd.               | Pharmacy   | 51 Road, opp NITEL Gate, Festac Town                                                    | Amuwo-Odofin | Lagos |
| 3898 | LA/0076 | LA/0076/S/4  | Pharm Care Support Services Ltd.               | Pharmacy   | 51 Road, opp NITEL Gate, Festac Town                                                    | Amuwo-Odofin | Lagos |
| 3899 | LA/0080 | LA/0080/S/3  | St. Jude's Hospital                            |            | 21 Road, B Close, House 3, Festac Town                                                  | Amuwo-Odofin | Lagos |
| 3900 | LA/0080 | LA/0080/S/2  | St. Jude's Hospital                            |            | 21 Road, B Close, House 3, Festac Town                                                  | Amuwo-Odofin | Lagos |

|      |         |              |                                         |          |                                                           |              |       |
|------|---------|--------------|-----------------------------------------|----------|-----------------------------------------------------------|--------------|-------|
| 3901 | LA/0080 | LA/0080/S/1  | St. Jude's Hospital                     |          | 21 Road, B Close, House 3, Festac Town                    | Amuwo-Odofin | Lagos |
| 3902 | LA/0082 | LA/0082/S/4  | Ituah Hospital Ltd.                     |          | 512 Road J. Close Festac Town Lagos                       | Amuwo-Odofin | Lagos |
| 3903 | LA/0082 | LA/0082/S/5  | Ituah Hospital Ltd.                     |          | 512 Road J. Close Festac Town Lagos                       | Amuwo-Odofin | Lagos |
| 3904 | LA/0085 | LA/0085/S/14 | Emel Hospital                           | -        | 21 Road Z Close, Festac Town                              | Amuwo-Odofin | Lagos |
| 3905 | LA/0085 | LA/0085/S/6  | Emel Hospital                           | -        | 21 Road Z Close, Festac Town                              | Amuwo-Odofin | Lagos |
| 3906 | LA/0085 | LA/0085/S/2  | Emel Hospital                           | -        | 21 Road Z Close, Festac Town                              | Amuwo-Odofin | Lagos |
| 3907 | LA/0085 | LA/0085/S/3  | Emel Hospital                           | -        | 21 Road Z Close, Festac Town                              | Amuwo-Odofin | Lagos |
| 3908 | LA/0085 | LA/0085/S/4  | Emel Hospital                           | -        | 21 Road Z Close, Festac Town                              | Amuwo-Odofin | Lagos |
| 3909 | LA/0085 | LA/0085/S/1  | Emel Hospital                           | -        | 21 Road Z Close, Festac Town                              | Amuwo-Odofin | Lagos |
| 3910 | LA/0085 | LA/0085/S/7  | Emel Hospital                           | -        | 21 Road Z Close, Festac Town                              | Amuwo-Odofin | Lagos |
| 3911 | LA/0086 | LA/0086/S/5  | AMC Hospital                            |          | House 19, Dubar Road, Mile 2, Lagos                       | Amuwo-Odofin | Lagos |
| 3912 | LA/0086 | LA/0086/S/14 | AMC Hospital                            |          | House 19, Dubar Road, Mile 2, Lagos                       | Amuwo-Odofin | Lagos |
| 3913 | LA/0088 | LA/0088/S/2  | Lagoon Hospital, Apapa                  |          | 8 Marine Road , Apapa Lagos                               | Apapa        | Lagos |
| 3914 | LA/0088 | LA/0088/S/8  | Lagoon Hospital, Apapa                  |          | 8 Marine Road , Apapa Lagos                               | Apapa        | Lagos |
| 3915 | LA/0088 | LA/0088/S/11 | Lagoon Hospital, Apapa                  |          | 8 Marine Road , Apapa Lagos                               | Apapa        | Lagos |
| 3916 | LA/0088 | LA/0088/S/5  | Lagoon Hospital, Apapa                  |          | 8 Marine Road , Apapa Lagos                               | Apapa        | Lagos |
| 3917 | LA/0088 | LA/0088/S/6  | Lagoon Hospital, Apapa                  |          | 8 Marine Road , Apapa Lagos                               | Apapa        | Lagos |
| 3918 | LA/0088 | LA/0088/S/1  | Lagoon Hospital, Apapa                  |          | 8 Marine Road , Apapa Lagos                               | Apapa        | Lagos |
| 3919 | LA/0088 | LA/0088/S/10 | Lagoon Hospital, Apapa                  |          | 8 Marine Road , Apapa Lagos                               | Apapa        | Lagos |
| 3920 | LA/0088 | LA/0088/S/12 | Lagoon Hospital, Apapa                  |          | 8 Marine Road , Apapa Lagos                               | Apapa        | Lagos |
| 3921 | LA/0088 | LA/0088/S/4  | Lagoon Hospital, Apapa                  |          | 8 Marine Road , Apapa Lagos                               | Apapa        | Lagos |
| 3922 | LA/0088 | LA/0088/S/7  | Lagoon Hospital, Apapa                  |          | 8 Marine Road , Apapa Lagos                               | Apapa        | Lagos |
| 3923 | LA/0088 | LA/0088/S/15 | Lagoon Hospital, Apapa                  |          | 8 Marine Road , Apapa Lagos                               | Apapa        | Lagos |
| 3924 | LA/0088 | LA/0088/S/3  | Lagoon Hospital, Apapa                  |          | 8 Marine Road , Apapa Lagos                               | Apapa        | Lagos |
| 3925 | LA/0090 | LA/0090/S/5  | Dako Medical Centre (Hosp. & Mat. Home) |          | 225b Kirikiri Rd., Trinity Bus Stop, Olodi, Apapa, Lagos. | Apapa        | Lagos |
| 3926 | LA/0097 | LA/0097/S/5  | Faleti Medical Centre                   |          | 204, Kirikiri Road, Trinity B/Stop, Olodi, Apapa, Lagos.  | Apapa        | Lagos |
| 3927 | LA/0099 | LA/0099/S/12 | Iduna Specialist Hospital               |          | 1a, Takorodi Road, Gra, Apapa, Lagos.                     | Apapa        | Lagos |
| 3928 | LA/0099 | LA/0099/S/3  | Iduna Specialist Hospital               |          | 1a, Takorodi Road, Gra, Apapa, Lagos.                     | Apapa        | Lagos |
| 3929 | LA/0099 | LA/0099/S/15 | Iduna Specialist Hospital               |          | 1a, Takorodi Road, Gra, Apapa, Lagos.                     | Apapa        | Lagos |
| 3930 | LA/0099 | LA/0099/S/5  | Iduna Specialist Hospital               |          | 1a, Takorodi Road, Gra, Apapa, Lagos.                     | Apapa        | Lagos |
| 3931 | LA/0099 | LA/0099/S/1  | Iduna Specialist Hospital               |          | 1a, Takorodi Road, Gra, Apapa, Lagos.                     | Apapa        | Lagos |
| 3932 | LA/0099 | LA/0099/S/2  | Iduna Specialist Hospital               |          | 1a, Takorodi Road, Gra, Apapa, Lagos.                     | Apapa        | Lagos |
| 3933 | LA/0099 | LA/0099/S/7  | Iduna Specialist Hospital               |          | 1a, Takorodi Road, Gra, Apapa, Lagos.                     | Apapa        | Lagos |
| 3934 | LA/0099 | LA/0099/S/6  | Iduna Specialist Hospital               |          | 1a, Takorodi Road, Gra, Apapa, Lagos.                     | Apapa        | Lagos |
| 3935 | LA/0101 | LA/0101/S/5  | Christ Medical Centre                   |          | 28 Randle Road, Apapa, Lagos                              | Apapa        | Lagos |
| 3936 | LA/0102 | LA/0102/S/5  | Hilton Hospital                         |          | 2 Berger Street, Olodi, Apapa, Lagos.                     | Apapa        | Lagos |
| 3937 | LA/0104 | LA/0104/S/4  | Jogen Pharm & Trading company Ltd.      | Pharmacy | 30 Ojo Road, Apapa                                        | Apapa        | Lagos |
| 3938 | LA/0105 | LA/0105/S/4  | Jaykay Pharmacy Ltd.                    | Pharmacy | 9 Randie Crescent, Apapa                                  | Apapa        | Lagos |
| 3939 | LA/0106 | LA/0106/S/4  | Jaykay Pharmacy Ltd.                    | Pharmacy | 14 Adeniyi Jones Avenue, Ikeja                            | Ikeja        | Lagos |
| 3940 | LA/0111 | LA/0111/S/8  | General Hospital, Badagry               |          | Badagry                                                   | Badagry      | Lagos |
| 3941 | LA/0112 | LA/0112/S/1  | Grace-Land Medical Center               |          | 147, Badagry Expressway                                   | Ojo          | Lagos |
| 3942 | LA/0112 | LA/0112/S/5  | Grace-Land Medical Center               |          | 147, Badagry Expressway                                   | Ojo          | Lagos |
| 3943 | LA/0112 | LA/0112/S/7  | Grace-Land Medical Center               |          | 147, Badagry Expressway                                   | Ojo          | Lagos |



|      |         |              |                               |                                                                                 |                                                            |          |       |
|------|---------|--------------|-------------------------------|---------------------------------------------------------------------------------|------------------------------------------------------------|----------|-------|
| 3944 | LA/0112 | LA/0112/S/4  | Grace-Land Medical Center     |                                                                                 | 147, Badagry Expressway                                    | Ojo      | Lagos |
| 3945 | LA/0112 | LA/0112/S/3  | Grace-Land Medical Center     |                                                                                 | 147, Badagry Expressway                                    | Ojo      | Lagos |
| 3946 | LA/0114 | LA/0114/S/5  | Kilad Merit Diagnostic Centre | Laboratory                                                                      | Casidy Bus Stop, Badagry Nexpressway Okokomaiko            | Badagry  | Lagos |
| 3947 | LA/0116 | LA/0116/S/15 | Udeco Eye Clinic              | Ophthalmology                                                                   | Suite E100, Ikota Shopping Complex, Lekki                  | Eti-Osa  | Lagos |
| 3948 | LA/0117 | LA/0117/S/2  | Pennisula Hospital            | Internal Medicine, O & G, Radiology, Laboratory, Ophthalmology, General Surgery | KM 23, Lekki-Epe Exp. Way, Lekki                           | Eti-Osa  | Lagos |
| 3949 | LA/0117 | LA/0117/S/1  | Pennisula Hospital            | Internal Medicine, O & G, Radiology, Laboratory, Ophthalmology, General Surgery | KM 23, Lekki-Epe Exp. Way, Lekki                           | Eti-Osa  | Lagos |
| 3950 | LA/0117 | LA/0117/S/7  | Pennisula Hospital            | Internal Medicine, O & G, Radiology, Laboratory, Ophthalmology, General Surgery | KM 23, Lekki-Epe Exp. Way, Lekki                           | Eti-Osa  | Lagos |
| 3951 | LA/0117 | LA/0117/S/15 | Pennisula Hospital            | Internal Medicine, O & G, Radiology, Laboratory, Ophthalmology, General Surgery | KM 23, Lekki-Epe Exp. Way, Lekki                           | Eti-Osa  | Lagos |
| 3952 | LA/0117 | LA/0117/S/5  | Pennisula Hospital            | Internal Medicine, O & G, Radiology, Laboratory, Ophthalmology, General Surgery | KM 23, Lekki-Epe Exp. Way, Lekki                           | Eti-Osa  | Lagos |
| 3953 | LA/0117 | LA/0117/S/3  | Pennisula Hospital            | Internal Medicine, O & G, Radiology, Laboratory, Ophthalmology, General Surgery | KM 23, Lekki-Epe Exp. Way, Lekki                           | Eti-Osa  | Lagos |
| 3954 | LA/0118 | LA/0118/S/5  | The Royal Infirmary           | General Medicine, General Surgery, O&G, Laboratory, Pharmacy                    | 36, Aiyetoro Str. By HFP/NGC off Lekki -Epe Exp. Way, Ajah | Damaturu | Yobe  |
| 3955 | LA/0118 | LA/0118/S/1  | The Royal Infirmary           | General Medicine, General Surgery, O&G, Laboratory, Pharmacy                    | 36, Aiyetoro Str. By HFP/NGC off Lekki -Epe Exp. Way, Ajah | Damaturu | Yobe  |
| 3956 | LA/0118 | LA/0118/S/3  | The Royal Infirmary           | General Medicine, General Surgery, O&G, Laboratory, Pharmacy                    | 36, Aiyetoro Str. By HFP/NGC off Lekki -Epe Exp. Way, Ajah | Damaturu | Yobe  |
| 3957 | LA/0118 | LA/0118/S/4  | The Royal Infirmary           | General Medicine, General Surgery, O&G, Laboratory, Pharmacy                    | 36, Aiyetoro Str. By HFP/NGC off Lekki -Epe Exp. Way, Ajah | Damaturu | Yobe  |
| 3958 | LA/0118 | LA/0118/S/2  | The Royal Infirmary           | General Medicine, General Surgery, O&G, Laboratory, Pharmacy                    | 36, Aiyetoro Str. By HFP/NGC off Lekki -Epe Exp. Way, Ajah | Damaturu | Yobe  |
| 3959 | LA/0119 | LA/0119/S/8  | Oral Dent, Dental Clinics     | Dental                                                                          | E62, Ikota Shopping Complex, Lekki                         | Eti-Osa  | Lagos |
| 3960 | LA/0123 | LA/0123/S/4  | Doreen Pharmacy               | Pharmacy                                                                        | 1, Kemfat Road, Thomas Village, Lekki-Epe Express Way      | Eti-Osa  | Lagos |
| 3961 | LA/0125 | LA/0125/S/4  | General Hospital, Epe         |                                                                                 | Epe                                                        | Epe      | Lagos |
| 3962 | LA/0125 | LA/0125/S/3  | General Hospital, Epe         |                                                                                 | Epe                                                        | Epe      | Lagos |
| 3963 | LA/0125 | LA/0125/S/1  | General Hospital, Epe         |                                                                                 | Epe                                                        | Epe      | Lagos |
| 3964 | LA/0127 | LA/0127/S/15 | Unique Eye Centre Ltd.        | Ophthalmology                                                                   | 21, Obalande Rd. Ikoyi                                     | Eti-Osa  | Lagos |

|      |         |              |                           |                                                                                                         |                                                                       |         |       |
|------|---------|--------------|---------------------------|---------------------------------------------------------------------------------------------------------|-----------------------------------------------------------------------|---------|-------|
| 3965 | LA/0129 | LA/0129/S/12 | Crest Consultant Clinics  | Int. Medicine, General Surgery, O & G, Paediatrics, Ophthalmology, ENT, Radiology, Laboratory, Pharmacy | 2, Keffi St., S.W. Ikoyi                                              | Eti-Osa | Lagos |
| 3966 | LA/0129 | LA/0129/S/7  | Crest Consultant Clinics  | Int. Medicine, General Surgery, O & G, Paediatrics, Ophthalmology, ENT, Radiology, Laboratory, Pharmacy | 2, Keffi St., S.W. Ikoyi                                              | Eti-Osa | Lagos |
| 3967 | LA/0134 | LA/0134/S/5  | Doren Specialist Hospital |                                                                                                         | 1 Kemfat Road, Thomas Village, Lekki.                                 | Eti-Osa | Lagos |
| 3968 | LA/0134 | LA/0134/S/7  | Doren Specialist Hospital |                                                                                                         | 1 Kemfat Road, Thomas Village, Lekki.                                 | Eti-Osa | Lagos |
| 3969 | LA/0134 | LA/0134/S/2  | Doren Specialist Hospital |                                                                                                         | 1 Kemfat Road, Thomas Village, Lekki.                                 | Eti-Osa | Lagos |
| 3970 | LA/0134 | LA/0134/S/1  | Doren Specialist Hospital |                                                                                                         | 1 Kemfat Road, Thomas Village, Lekki.                                 | Eti-Osa | Lagos |
| 3971 | LA/0134 | LA/0134/S/10 | Doren Specialist Hospital |                                                                                                         | 1 Kemfat Road, Thomas Village, Lekki.                                 | Eti-Osa | Lagos |
| 3972 | LA/0135 | LA/0135/S/2  | Kings Hospital            |                                                                                                         | 39 Mashalashi Street off Keffi Road, Obalende, Ikoyi                  | Eti-Osa | Lagos |
| 3973 | LA/0135 | LA/0135/S/5  | Kings Hospital            |                                                                                                         | 39 Mashalashi Street off Keffi Road, Obalende, Ikoyi                  | Eti-Osa | Lagos |
| 3974 | LA/0135 | LA/0135/S/3  | Kings Hospital            |                                                                                                         | 39 Mashalashi Street off Keffi Road, Obalende, Ikoyi                  | Eti-Osa | Lagos |
| 3975 | LA/0135 | LA/0135/S/1  | Kings Hospital            |                                                                                                         | 39 Mashalashi Street off Keffi Road, Obalende, Ikoyi                  | Eti-Osa | Lagos |
| 3976 | LA/0136 | LA/0136/S/7  | Gold Cross Hospital       |                                                                                                         | 17B Bourdillon Road, Ikoyi                                            | Eti-Osa | Lagos |
| 3977 | LA/0136 | LA/0136/S/1  | Gold Cross Hospital       |                                                                                                         | 17B Bourdillon Road, Ikoyi                                            | Eti-Osa | Lagos |
| 3978 | LA/0136 | LA/0136/S/10 | Gold Cross Hospital       |                                                                                                         | 17B Bourdillon Road, Ikoyi                                            | Eti-Osa | Lagos |
| 3979 | LA/0136 | LA/0136/S/5  | Gold Cross Hospital       |                                                                                                         | 17B Bourdillon Road, Ikoyi                                            | Eti-Osa | Lagos |
| 3980 | LA/0136 | LA/0136/S/4  | Gold Cross Hospital       |                                                                                                         | 17B Bourdillon Road, Ikoyi                                            | Eti-Osa | Lagos |
| 3981 | LA/0143 | LA/0143/S/5  | J-Rapha Hospital          |                                                                                                         | 40 Ado Lamgbasa Road, Ajah,                                           | Eti-Osa | Lagos |
| 3982 | LA/0143 | LA/0143/S/4  | J-Rapha Hospital          |                                                                                                         | 40 Ado Lamgbasa Road, Ajah,                                           | Eti-Osa | Lagos |
| 3983 | LA/0145 | LA/0145/S/3  | Germaine Health Centre    |                                                                                                         | Km 63 Lagos/Epe Expressway, Lekki, Lagos.                             | Eti-Osa | Lagos |
| 3984 | LA/0145 | LA/0145/S/2  | Germaine Health Centre    |                                                                                                         | Km 63 Lagos/Epe Expressway, Lekki, Lagos.                             | Eti-Osa | Lagos |
| 3985 | LA/0145 | LA/0145/S/7  | Germaine Health Centre    |                                                                                                         | Km 63 Lagos/Epe Expressway, Lekki, Lagos.                             | Eti-Osa | Lagos |
| 3986 | LA/0145 | LA/0145/S/5  | Germaine Health Centre    |                                                                                                         | Km 63 Lagos/Epe Expressway, Lekki, Lagos.                             | Eti-Osa | Lagos |
| 3987 | LA/0145 | LA/0145/S/10 | Germaine Health Centre    |                                                                                                         | Km 63 Lagos/Epe Expressway, Lekki, Lagos.                             | Eti-Osa | Lagos |
| 3988 | LA/0147 | LA/0147/S/7  | The Peninsular Hospital   |                                                                                                         | Km 23, Lagos Expressway, Ikota, Lekki, Lagos                          | Eti-Osa | Lagos |
| 3989 | LA/0147 | LA/0147/S/5  | The Peninsular Hospital   |                                                                                                         | Km 23, Lagos Expressway, Ikota, Lekki, Lagos                          | Eti-Osa | Lagos |
| 3990 | LA/0147 | LA/0147/S/1  | The Peninsular Hospital   |                                                                                                         | Km 23, Lagos Expressway, Ikota, Lekki, Lagos                          | Eti-Osa | Lagos |
| 3991 | LA/0150 | LA/0150/S/1  | Udeco Medical Centre      |                                                                                                         | Plot 39, 36 Udeco Medical Road off Chevron Drive, Chevy Estate, Lekki | Eti-Osa | Lagos |
| 3992 | LA/0150 | LA/0150/S/15 | Udeco Medical Centre      |                                                                                                         | Plot 39, 36 Udeco Medical Road off Chevron Drive, Chevy Estate, Lekki | Eti-Osa | Lagos |
| 3993 | LA/0150 | LA/0150/S/2  | Udeco Medical Centre      |                                                                                                         | Plot 39, 36 Udeco Medical Road off Chevron Drive, Chevy Estate, Lekki | Eti-Osa | Lagos |
| 3994 | LA/0156 | LA/0156/S/4  | Pearle Pharmacy           | Pharmacy                                                                                                | 32, Ajeniya St. Obalende, Ikoyi                                       | Eti-Osa | Lagos |

|      |         |              |                             |                                          |                                                              |             |       |
|------|---------|--------------|-----------------------------|------------------------------------------|--------------------------------------------------------------|-------------|-------|
| 3995 | LA/0159 | LA/0159/S/4  | His-Care Int'l              | Pharmacy                                 | Suite 1, New Giwa Shopping Complex, Rumens Road, Off Kingswa | Eti-Osa     | Lagos |
| 3996 | LA/0160 | LA/0160/S/7  | Cosmos Diagnostic Centre    | Radiology ,<br>Mammagram ,<br>Laboratory | 202 Awolowo Road Folomo Ikoyi                                | Eti-Osa     | Lagos |
| 3997 | LA/0160 | LA/0160/S/5  | Cosmos Diagnostic Centre    | Radiology ,<br>Mammagram ,<br>Laboratory | 202 Awolowo Road Folomo Ikoyi                                | Eti-Osa     | Lagos |
| 3998 | LA/0167 | LA/0167/S/5  | Fehinbade Dignostics        | Laboratory                               | 2 Lawal Street off Church Bus Stop, Jankara, Ijaiye Ojokoro  | Ifako-Ijaye | Lagos |
| 3999 | LA/0174 | LA/0174/S/7  | Eko Hospital, Ikeja         |                                          | 31, Mobolaji Bank, Anthony Way Ikeja                         | Ikeja       | Lagos |
| 4000 | LA/0174 | LA/0174/S/8  | Eko Hospital, Ikeja         |                                          | 31, Mobolaji Bank, Anthony Way Ikeja                         | Ikeja       | Lagos |
| 4001 | LA/0174 | LA/0174/S/15 | Eko Hospital, Ikeja         |                                          | 31, Mobolaji Bank, Anthony Way Ikeja                         | Ikeja       | Lagos |
| 4002 | LA/0174 | LA/0174/S/1  | Eko Hospital, Ikeja         |                                          | 31, Mobolaji Bank, Anthony Way Ikeja                         | Ikeja       | Lagos |
| 4003 | LA/0174 | LA/0174/S/3  | Eko Hospital, Ikeja         |                                          | 31, Mobolaji Bank, Anthony Way Ikeja                         | Ikeja       | Lagos |
| 4004 | LA/0174 | LA/0174/S/6  | Eko Hospital, Ikeja         |                                          | 31, Mobolaji Bank, Anthony Way Ikeja                         | Ikeja       | Lagos |
| 4005 | LA/0174 | LA/0174/S/2  | Eko Hospital, Ikeja         |                                          | 31, Mobolaji Bank, Anthony Way Ikeja                         | Ikeja       | Lagos |
| 4006 | LA/0174 | LA/0174/S/12 | Eko Hospital, Ikeja         |                                          | 31, Mobolaji Bank, Anthony Way Ikeja                         | Ikeja       | Lagos |
| 4007 | LA/0174 | LA/0174/S/10 | Eko Hospital, Ikeja         |                                          | 31, Mobolaji Bank, Anthony Way Ikeja                         | Ikeja       | Lagos |
| 4008 | LA/0176 | LA/0176/S/3  | Bodet Medicare & Maternity  |                                          | 6/8 Odewale St. Alausa, Ikeja                                | Ikeja       | Lagos |
| 4009 | LA/0177 | LA/0177/S/1  | Brafus Specialist Hospital  |                                          | 1b Ajayi Road, Ogba                                          | Ikeja       | Lagos |
| 4010 | LA/0179 | LA/0179/S/5  | St. Leo's Catholic Clinic   |                                          | C/O Catholic Church,10 Toyin Str. Ikeja                      | Ikeja       | Lagos |
| 4011 | LA/0181 | LA/0181/S/5  | Life Support Medical Center | -                                        | 1, Oba Docemo Street G.R.A Ikeja, Lagos.                     | Ikeja       | Lagos |
| 4012 | LA/0181 | LA/0181/S/2  | Life Support Medical Center | -                                        | 1, Oba Docemo Street G.R.A Ikeja, Lagos.                     | Ikeja       | Lagos |
| 4013 | LA/0182 | LA/0182/S/6  | St. Ives Medical Centre     |                                          | 90 Opebi Rd. Ikeja                                           | Ikeja       | Lagos |
| 4014 | LA/0182 | LA/0182/S/7  | St. Ives Medical Centre     |                                          | 90 Opebi Rd. Ikeja                                           | Ikeja       | Lagos |
| 4015 | LA/0182 | LA/0182/S/14 | St. Ives Medical Centre     |                                          | 90 Opebi Rd. Ikeja                                           | Ikeja       | Lagos |
| 4016 | LA/0182 | LA/0182/S/4  | St. Ives Medical Centre     |                                          | 90 Opebi Rd. Ikeja                                           | Ikeja       | Lagos |
| 4017 | LA/0182 | LA/0182/S/3  | St. Ives Medical Centre     |                                          | 90 Opebi Rd. Ikeja                                           | Ikeja       | Lagos |
| 4018 | LA/0182 | LA/0182/S/5  | St. Ives Medical Centre     |                                          | 90 Opebi Rd. Ikeja                                           | Ikeja       | Lagos |
| 4019 | LA/0186 | LA/0186/S/3  | Ikeja Medical Centre        |                                          | 11 Ogun Modede Street Off, Allen Avenue , Ikeja              | Ikeja       | Lagos |
| 4020 | LA/0186 | LA/0186/S/1  | Ikeja Medical Centre        |                                          | 11 Ogun Modede Street Off, Allen Avenue , Ikeja              | Ikeja       | Lagos |
| 4021 | LA/0186 | LA/0186/S/14 | Ikeja Medical Centre        |                                          | 11 Ogun Modede Street Off, Allen Avenue , Ikeja              | Ikeja       | Lagos |
| 4022 | LA/0186 | LA/0186/S/8  | Ikeja Medical Centre        |                                          | 11 Ogun Modede Street Off, Allen Avenue , Ikeja              | Ikeja       | Lagos |
| 4023 | LA/0186 | LA/0186/S/4  | Ikeja Medical Centre        |                                          | 11 Ogun Modede Street Off, Allen Avenue , Ikeja              | Ikeja       | Lagos |
| 4024 | LA/0186 | LA/0186/S/5  | Ikeja Medical Centre        |                                          | 11 Ogun Modede Street Off, Allen Avenue , Ikeja              | Ikeja       | Lagos |
| 4025 | LA/0186 | LA/0186/S/15 | Ikeja Medical Centre        |                                          | 11 Ogun Modede Street Off, Allen Avenue , Ikeja              | Ikeja       | Lagos |
| 4026 | LA/0186 | LA/0186/S/7  | Ikeja Medical Centre        |                                          | 11 Ogun Modede Street Off, Allen Avenue , Ikeja              | Ikeja       | Lagos |
| 4027 | LA/0189 | LA/0189/S/4  | County Hospital Ltd.        |                                          | 41-45 Isheri Road Ogba Ikeja Lagos                           | Ikeja       | Lagos |
| 4028 | LA/0189 | LA/0189/S/15 | County Hospital Ltd.        |                                          | 41-45 Isheri Road Ogba Ikeja Lagos                           | Ikeja       | Lagos |
| 4029 | LA/0189 | LA/0189/S/7  | County Hospital Ltd.        |                                          | 41-45 Isheri Road Ogba Ikeja Lagos                           | Ikeja       | Lagos |
| 4030 | LA/0189 | LA/0189/S/1  | County Hospital Ltd.        |                                          | 41-45 Isheri Road Ogba Ikeja Lagos                           | Ikeja       | Lagos |
| 4031 | LA/0189 | LA/0189/S/6  | County Hospital Ltd.        |                                          | 41-45 Isheri Road Ogba Ikeja Lagos                           | Ikeja       | Lagos |
| 4032 | LA/0189 | LA/0189/S/14 | County Hospital Ltd.        |                                          | 41-45 Isheri Road Ogba Ikeja Lagos                           | Ikeja       | Lagos |
| 4033 | LA/0189 | LA/0189/S/5  | County Hospital Ltd.        |                                          | 41-45 Isheri Road Ogba Ikeja Lagos                           | Ikeja       | Lagos |
| 4034 | LA/0189 | LA/0189/S/2  | County Hospital Ltd.        |                                          | 41-45 Isheri Road Ogba Ikeja Lagos                           | Ikeja       | Lagos |
| 4035 | LA/0189 | LA/0189/S/3  | County Hospital Ltd.        |                                          | 41-45 Isheri Road Ogba Ikeja Lagos                           | Ikeja       | Lagos |
| 4036 | LA/0190 | LA/0190/S/3  | Motayo Hospital Limited     |                                          | 3. Owodumi Street, Off Toyin Street Ikeja Lagos              | Ikeja       | Lagos |

|      |         |              |                                    |            |                                                               |         |       |
|------|---------|--------------|------------------------------------|------------|---------------------------------------------------------------|---------|-------|
| 4037 | LA/0190 | LA/0190/S/7  | Motayo Hospital Limited            |            | 3. Owodumi Street, Off Toyin Street Ikeja Lagos               | Ikeja   | Lagos |
| 4038 | LA/0190 | LA/0190/S/4  | Motayo Hospital Limited            |            | 3. Owodumi Street, Off Toyin Street Ikeja Lagos               | Ikeja   | Lagos |
| 4039 | LA/0190 | LA/0190/S/1  | Motayo Hospital Limited            |            | 3. Owodumi Street, Off Toyin Street Ikeja Lagos               | Ikeja   | Lagos |
| 4040 | LA/0190 | LA/0190/S/8  | Motayo Hospital Limited            |            | 3. Owodumi Street, Off Toyin Street Ikeja Lagos               | Ikeja   | Lagos |
| 4041 | LA/0190 | LA/0190/S/6  | Motayo Hospital Limited            |            | 3. Owodumi Street, Off Toyin Street Ikeja Lagos               | Ikeja   | Lagos |
| 4042 | LA/0191 | LA/0191/S/2  | CRI Medi Clinics - Ikeja           |            | Ikeja Opearations Hq Ngb Building 144 Oba Akran Avenue Ikeja  | Ikeja   | Lagos |
| 4043 | LA/0191 | LA/0191/S/4  | CRI Medi Clinics - Ikeja           |            | Ikeja Opearations Hq Ngb Building 144 Oba Akran Avenue Ikeja  | Ikeja   | Lagos |
| 4044 | LA/0191 | LA/0191/S/5  | CRI Medi Clinics - Ikeja           |            | Ikeja Opearations Hq Ngb Building 144 Oba Akran Avenue Ikeja  | Ikeja   | Lagos |
| 4045 | LA/0191 | LA/0191/S/7  | CRI Medi Clinics - Ikeja           |            | Ikeja Opearations Hq Ngb Building 144 Oba Akran Avenue Ikeja  | Ikeja   | Lagos |
| 4046 | LA/0206 | LA/0206/S/4  | Pharm. Agboola Oguntonade          | Pharmacy   | 1, Oguntonade Close, Okupe Estate, Maryland                   | Ikeja   | Lagos |
| 4047 | LA/0209 | LA/0209/S/5  | Kowa Medical Diagnosis Laboratory  | Laboratory | 12 Medical Road, Ikeja                                        | Ikeja   | Lagos |
| 4048 | LA/0211 | LA/0211/S/5  | Jimak Medical Diagnosis Lab.       | Laboratory | 17, Medical Road, Simbat Rd. Ikeja                            | Ikeja   | Lagos |
| 4049 | LA/0213 | LA/0213/S/4  | Pharmarision Ltd.                  | Pharmacy   | 36, Oluwoleyimu Street, Ikeja                                 | Ikeja   | Lagos |
| 4050 | LA/0217 | LA/0217/S/4  | CRI Mediclinic                     | Pharmacy   | Isaac John Street, GRA, Ikeja                                 | Ikeja   | Lagos |
| 4051 | LA/0220 | LA/0220/S/4  | Alpha Pharmacy & Stores Ltd.       | Pharmacy   | 2B Alabi Street, Off Toyin Street, Ikeja                      | Ikeja   | Lagos |
| 4052 | LA/0222 | LA/0222/S/4  | Kerson Pharmaceuticals (Nig.) Ltd. | Pharmacy   | 5, Diya Street, Ifako, Gbadada, Ikeja                         | Ikeja   | Lagos |
| 4053 | LA/0226 | LA/0226/S/4  | Bolar Pharmaceuticals Ltd.         | Pharmacy   | 72A Adeniyi Jones Avenue, Ikeja                               | Ikeja   | Lagos |
| 4054 | LA/0228 | LA/0228/S/4  | Dukeb Pharmaceuticals Ltd.         | Pharmacy   | 9 Olabode Str., Ajao Estate, Ikeja                            | Ikeja   | Lagos |
| 4055 | LA/0231 | LA/0231/S/4  | Boluke Pharm Ltd.                  | Pharmacy   | 134, Awolowo Way, Ikeja                                       | Ikeja   | Lagos |
| 4056 | LA/0232 | LA/0232/S/4  | Moray Pharm                        | Pharmacy   | 21, Kodesoh Street, Ikeja                                     | Ikeja   | Lagos |
| 4057 | LA/0233 | LA/0233/S/4  | Pharma Vision Ltd.                 | Pharmacy   | 36, Oluwoleyinmi Street, Ikeja                                | Ikeja   | Lagos |
| 4058 | LA/0235 | LA/0235/S/4  | Domat Pharmacy                     | Pharmacy   | 80 Obafemi Awolowo Way, Ikeja                                 | Ikeja   | Lagos |
| 4059 | LA/0237 | LA/0237/S/4  | New-Gate Hospital                  |            | 59 Ikorodu                                                    | Ikorodu | Lagos |
| 4060 | LA/0238 | LA/0238/S/5  | General Hospital, Ikorodu          | -          | Ikorodu, Lagos                                                | Ikorodu | Lagos |
| 4061 | LA/0238 | LA/0238/S/2  | General Hospital, Ikorodu          | -          | Ikorodu, Lagos                                                | Ikorodu | Lagos |
| 4062 | LA/0238 | LA/0238/S/1  | General Hospital, Ikorodu          | -          | Ikorodu, Lagos                                                | Ikorodu | Lagos |
| 4063 | LA/0238 | LA/0238/S/6  | General Hospital, Ikorodu          | -          | Ikorodu, Lagos                                                | Ikorodu | Lagos |
| 4064 | LA/0238 | LA/0238/S/7  | General Hospital, Ikorodu          | -          | Ikorodu, Lagos                                                | Ikorodu | Lagos |
| 4065 | LA/0238 | LA/0238/S/12 | General Hospital, Ikorodu          | -          | Ikorodu, Lagos                                                | Ikorodu | Lagos |
| 4066 | LA/0238 | LA/0238/S/8  | General Hospital, Ikorodu          | -          | Ikorodu, Lagos                                                | Ikorodu | Lagos |
| 4067 | LA/0238 | LA/0238/S/3  | General Hospital, Ikorodu          | -          | Ikorodu, Lagos                                                | Ikorodu | Lagos |
| 4068 | LA/0238 | LA/0238/S/4  | General Hospital, Ikorodu          | -          | Ikorodu, Lagos                                                | Ikorodu | Lagos |
| 4069 | LA/0239 | LA/0239/S/7  | Ikorodu Hospital & Clinic.         | -          | 9, Muniratu Ajojo Street, Off Lagos Road By Afribank, Ikorodu | Ikorodu | Lagos |
| 4070 | LA/0239 | LA/0239/S/5  | Ikorodu Hospital & Clinic.         | -          | 9, Muniratu Ajojo Street, Off Lagos Road By Afribank, Ikorodu | Ikorodu | Lagos |
| 4071 | LA/0243 | LA/0243/S/4  | Ramar Pharmacy                     | Pharmacy   | No. 29 Ayangburen Road Opp. NEPA, Ikorodu                     | Ikorodu | Lagos |
| 4072 | LA/0244 | LA/0244/S/4  | Diagnostics Associates (W.A) Ltd   | Laboratory | No.4 Shagamu Rd, Ikorodu                                      | Ikorodu | Lagos |
| 4073 | LA/0245 | LA/0245/S/4  | Jimac Diagnostics Medical Lab.     | Laboratory | No.11 Jokodola Close, Ikorodu                                 | Ikorodu | Lagos |
| 4074 | LA/0251 | LA/0251/S/1  | Deji Clinic Ltd.                   |            | 19 Demurin Street, Catop Chicken George Ketu Lagos            | Kosofe  | Lagos |
| 4075 | LA/0251 | LA/0251/S/3  | Deji Clinic Ltd.                   |            | 19 Demurin Street, Catop Chicken George Ketu Lagos            | Kosofe  | Lagos |
| 4076 | LA/0251 | LA/0251/S/4  | Deji Clinic Ltd.                   |            | 19 Demurin Street, Catop Chicken George Ketu Lagos            | Kosofe  | Lagos |

|      |         |              |                                        |          |                                                                              |                |       |
|------|---------|--------------|----------------------------------------|----------|------------------------------------------------------------------------------|----------------|-------|
| 4077 | LA/0251 | LA/0251/S/5  | Deji Clinic Ltd.                       |          | 19 Demurin Street, Catop Chicken George Ketu Lagos                           | Kosofe         | Lagos |
| 4078 | LA/0260 | LA/0260/S/4  | Lydab Pharm. & Stores                  | Pharmacy | No. 7 Dipo Awolasi Street, Majodo GRA, Ketu                                  | Kosofe         | Lagos |
| 4079 | LA/0261 | LA/0261/S/4  | Aflog Pharmacy                         | Pharmacy | No. 4 Agboyi Road Alopere-Ketu                                               | Kosofe         | Lagos |
| 4080 | LA/0264 | LA/0264/S/4  | Demsol Pharmacy Ltd.                   | Pharmacy | 1 Moses Adebisi Str. Beside Total Oshogun Bus-stop, Alapere, Ketu            | Kosofe         | Lagos |
| 4081 | LA/0265 | LA/0265/S/4  | Med-In Specialist Hospital             |          | 1, Osgubo Street Ogudu, Kosofe                                               | Kosofe         | Lagos |
| 4082 | LA/0265 | LA/0265/S/1  | Med-In Specialist Hospital             |          | 1, Osgubo Street Ogudu, Kosofe                                               | Kosofe         | Lagos |
| 4083 | LA/0265 | LA/0265/S/15 | Med-In Specialist Hospital             |          | 1, Osgubo Street Ogudu, Kosofe                                               | Kosofe         | Lagos |
| 4084 | LA/0265 | LA/0265/S/12 | Med-In Specialist Hospital             |          | 1, Osgubo Street Ogudu, Kosofe                                               | Kosofe         | Lagos |
| 4085 | LA/0265 | LA/0265/S/3  | Med-In Specialist Hospital             |          | 1, Osgubo Street Ogudu, Kosofe                                               | Kosofe         | Lagos |
| 4086 | LA/0265 | LA/0265/S/2  | Med-In Specialist Hospital             |          | 1, Osgubo Street Ogudu, Kosofe                                               | Kosofe         | Lagos |
| 4087 | LA/0265 | LA/0265/S/8  | Med-In Specialist Hospital             |          | 1, Osgubo Street Ogudu, Kosofe                                               | Kosofe         | Lagos |
| 4088 | LA/0265 | LA/0265/S/5  | Med-In Specialist Hospital             |          | 1, Osgubo Street Ogudu, Kosofe                                               | Kosofe         | Lagos |
| 4089 | LA/0265 | LA/0265/S/6  | Med-In Specialist Hospital             |          | 1, Osgubo Street Ogudu, Kosofe                                               | Kosofe         | Lagos |
| 4090 | LA/0267 | LA/0267/S/5  | Avon Medical Services Limited          |          | 3rd Floor, West Wing City Hall, Catholic Mission Street, Lagos               | Lagos Island   | Lagos |
| 4091 | LA/0268 | LA/0268/S/5  | Longing Medical Centre                 |          | 1 Josepha Close, Off Ogundeji Oguntona St, By Ajala Bus Stop, Ijaiye Ojokoro | Ifako-Ijaye    | Lagos |
| 4092 | LA/0268 | LA/0268/S/3  | Longing Medical Centre                 |          | 1 Josepha Close, Off Ogundeji Oguntona St, By Ajala Bus Stop, Ijaiye Ojokoro | Ifako-Ijaye    | Lagos |
| 4093 | LA/0268 | LA/0268/S/1  | Longing Medical Centre                 |          | 1 Josepha Close, Off Ogundeji Oguntona St, By Ajala Bus Stop, Ijaiye Ojokoro | Ifako-Ijaye    | Lagos |
| 4094 | LA/0269 | LA/0269/S/5  | Good Faith Clinic                      |          | 19, Ojo-Giwa Street, Off Idumagbo Avenue, Lagos.                             | Lagos Island   | Lagos |
| 4095 | LA/0275 | LA/0275/S/1  | St. Paul's Hospital & Maternity Centre |          | 71a Ondo Street (East), Ebute Metta                                          | Lagos Mainland | Lagos |
| 4096 | LA/0277 | LA/0277/S/1  | Mount Sinai Hospital - Ebute Metta     |          | 177, Borno Way, Ebute Metta                                                  | Lagos Mainland | Lagos |
| 4097 | LA/0279 | LA/0279/S/4  | Federal Medical Centre - Ebute Metta   |          | PMB 1097, Ebute-Metta                                                        | Lagos Mainland | Lagos |
| 4098 | LA/0279 | LA/0279/S/5  | Federal Medical Centre - Ebute Metta   |          | PMB 1097, Ebute-Metta                                                        | Lagos Mainland | Lagos |
| 4099 | LA/0279 | LA/0279/S/3  | Federal Medical Centre - Ebute Metta   |          | PMB 1097, Ebute-Metta                                                        | Lagos Mainland | Lagos |
| 4100 | LA/0279 | LA/0279/S/1  | Federal Medical Centre - Ebute Metta   |          | PMB 1097, Ebute-Metta                                                        | Lagos Mainland | Lagos |
| 4101 | LA/0279 | LA/0279/S/6  | Federal Medical Centre - Ebute Metta   |          | PMB 1097, Ebute-Metta                                                        | Lagos Mainland | Lagos |
| 4102 | LA/0279 | LA/0279/S/8  | Federal Medical Centre - Ebute Metta   |          | PMB 1097, Ebute-Metta                                                        | Lagos Mainland | Lagos |
| 4103 | LA/0279 | LA/0279/S/7  | Federal Medical Centre - Ebute Metta   |          | PMB 1097, Ebute-Metta                                                        | Lagos Mainland | Lagos |
| 4104 | LA/0279 | LA/0279/S/15 | Federal Medical Centre - Ebute Metta   |          | PMB 1097, Ebute-Metta                                                        | Lagos Mainland | Lagos |
| 4105 | LA/0279 | LA/0279/S/12 | Federal Medical Centre - Ebute Metta   |          | PMB 1097, Ebute-Metta                                                        | Lagos Mainland | Lagos |
| 4106 | LA/0279 | LA/0279/S/2  | Federal Medical Centre - Ebute Metta   |          | PMB 1097, Ebute-Metta                                                        | Lagos Mainland | Lagos |
| 4107 | LA/0288 | LA/0288/S/7  | St. Luke's Hospital                    |          | 18 Commercial Avenue, Sabo, Yaba, Lagos.                                     | Lagos Mainland | Lagos |
| 4108 | LA/0288 | LA/0288/S/4  | St. Luke's Hospital                    |          | 18 Commercial Avenue, Sabo, Yaba, Lagos.                                     | Lagos Mainland | Lagos |
| 4109 | LA/0288 | LA/0288/S/8  | St. Luke's Hospital                    |          | 18 Commercial Avenue, Sabo, Yaba, Lagos.                                     | Lagos Mainland | Lagos |
| 4110 | LA/0288 | LA/0288/S/5  | St. Luke's Hospital                    |          | 18 Commercial Avenue, Sabo, Yaba, Lagos.                                     | Lagos Mainland | Lagos |

|      |         |              |                                               |            |                                                                  |                |       |
|------|---------|--------------|-----------------------------------------------|------------|------------------------------------------------------------------|----------------|-------|
| 4111 | LA/0289 | LA/0289/S/14 | Psychiatric Hospital(Community/S taff Clinic) |            | Yaba, Lagos                                                      | Lagos Mainland | Lagos |
| 4112 | LA/0289 | LA/0289/S/5  | Psychiatric Hospital(Community/S taff Clinic) |            | Yaba, Lagos                                                      | Lagos Mainland | Lagos |
| 4113 | LA/0289 | LA/0289/S/4  | Psychiatric Hospital(Community/S taff Clinic) |            | Yaba, Lagos                                                      | Lagos Mainland | Lagos |
| 4114 | LA/0289 | LA/0289/S/7  | Psychiatric Hospital(Community/S taff Clinic) |            | Yaba, Lagos                                                      | Lagos Mainland | Lagos |
| 4115 | LA/0289 | LA/0289/S/11 | Psychiatric Hospital(Community/S taff Clinic) |            | Yaba, Lagos                                                      | Lagos Mainland | Lagos |
| 4116 | LA/0289 | LA/0289/S/9  | Psychiatric Hospital(Community/S taff Clinic) |            | Yaba, Lagos                                                      | Lagos Mainland | Lagos |
| 4117 | LA/0291 | LA/0291/S/1  | Marien Clinic                                 | -          | 7, Montgomery Road, Yaba, Lagos                                  | Lagos Mainland | Lagos |
| 4118 | LA/0291 | LA/0291/S/2  | Marien Clinic                                 | -          | 7, Montgomery Road, Yaba, Lagos                                  | Lagos Mainland | Lagos |
| 4119 | LA/0291 | LA/0291/S/3  | Marien Clinic                                 | -          | 7, Montgomery Road, Yaba, Lagos                                  | Lagos Mainland | Lagos |
| 4120 | LA/0291 | LA/0291/S/5  | Marien Clinic                                 | -          | 7, Montgomery Road, Yaba, Lagos                                  | Lagos Mainland | Lagos |
| 4121 | LA/0291 | LA/0291/S/6  | Marien Clinic                                 | -          | 7, Montgomery Road, Yaba, Lagos                                  | Lagos Mainland | Lagos |
| 4122 | LA/0292 | LA/0292/S/4  | Carrot-Top Drugs Ltd.                         | Pharmacy   | 59, Tapa Str. Opp. LSDPC Housing Estate Gate, Ebute Metta.       | Lagos Mainland | Lagos |
| 4123 | LA/0294 | LA/0294/S/5  | Qualimax Diagnostic Laboratories              | Laboratory | 54, Pedro Road, Famous B/Stop Bariga Sabo, Yaba                  | Lagos Mainland | Lagos |
| 4124 | LA/0295 | LA/0295/S/5  | Keen Medical Diagnosis & Laboratory Services  | Laboratory | No. 248, Borno Way, Off Adekunle str., Yaba Lagos                | Lagos Mainland | Lagos |
| 4125 | LA/0296 | LA/0296/S/5  | Blessed-Gaye Madical Diag. centre             | Laboratory | 340, Borno Way, Alagomeji                                        | Lagos Mainland | Lagos |
| 4126 | LA/0302 | LA/0302/S/4  | Raola Pharmacy & Stores                       | Pharmacy   | 27, Commercial Avenue, Yaba                                      | Lagos Mainland | Lagos |
| 4127 | LA/0303 | LA/0303/S/4  | Okolowhite Nig. Ltd, Pharmacy & Stores        | Pharmacy   | 41a Commercial Avenue, Yaba                                      | Lagos Mainland | Lagos |
| 4128 | LA/0304 | LA/0304/S/4  | Josfred International Ltd.                    | Pharmacy   | Suite 149, Mayoung Barracks, Yaba, Lagos.                        | Lagos Mainland | Lagos |
| 4129 | LA/0306 | LA/0306/S/12 | Ultima Medical Hospital                       |            | 3. Cappa Avenue Palmgrove Estate Mushin Lagos                    | Mushin         | Lagos |
| 4130 | LA/0306 | LA/0306/S/5  | Ultima Medical Hospital                       |            | 3. Cappa Avenue Palmgrove Estate Mushin Lagos                    | Mushin         | Lagos |
| 4131 | LA/0306 | LA/0306/S/6  | Ultima Medical Hospital                       |            | 3. Cappa Avenue Palmgrove Estate Mushin Lagos                    | Mushin         | Lagos |
| 4132 | LA/0306 | LA/0306/S/3  | Ultima Medical Hospital                       |            | 3. Cappa Avenue Palmgrove Estate Mushin Lagos                    | Mushin         | Lagos |
| 4133 | LA/0306 | LA/0306/S/10 | Ultima Medical Hospital                       |            | 3. Cappa Avenue Palmgrove Estate Mushin Lagos                    | Mushin         | Lagos |
| 4134 | LA/0306 | LA/0306/S/2  | Ultima Medical Hospital                       |            | 3. Cappa Avenue Palmgrove Estate Mushin Lagos                    | Mushin         | Lagos |
| 4135 | LA/0306 | LA/0306/S/1  | Ultima Medical Hospital                       |            | 3. Cappa Avenue Palmgrove Estate Mushin Lagos                    | Mushin         | Lagos |
| 4136 | LA/0309 | LA/0309/S/2  | St. Claire Hospital                           |            | 44 Alh. Mush Street Papa Ajao Mushin Lagos                       | Mushin         | Lagos |
| 4137 | LA/0311 | LA/0311/S/5  | Hillstar Clinics                              |            | 98 Palm Avenue Papa Ajao, Mushin Lagos                           | Mushin         | Lagos |
| 4138 | LA/0311 | LA/0311/S/2  | Hillstar Clinics                              |            | 98 Palm Avenue Papa Ajao, Mushin Lagos                           | Mushin         | Lagos |
| 4139 | LA/0311 | LA/0311/S/3  | Hillstar Clinics                              |            | 98 Palm Avenue Papa Ajao, Mushin Lagos                           | Mushin         | Lagos |
| 4140 | LA/0311 | LA/0311/S/1  | Hillstar Clinics                              |            | 98 Palm Avenue Papa Ajao, Mushin Lagos                           | Mushin         | Lagos |
| 4141 | LA/0313 | LA/0313/S/3  | May Clinics Limited                           |            | Doxology House, 24/26 Sadiku Street Ilasamaja, Off Isolo Express | Mushin         | Lagos |
| 4142 | LA/0313 | LA/0313/S/2  | May Clinics Limited                           |            | Doxology House, 24/26 Sadiku Street Ilasamaja, Off Isolo Express | Mushin         | Lagos |
| 4143 | LA/0313 | LA/0313/S/7  | May Clinics Limited                           |            | Doxology House, 24/26 Sadiku Street Ilasamaja, Off Isolo Express | Mushin         | Lagos |
| 4144 | LA/0313 | LA/0313/S/1  | May Clinics Limited                           |            | Doxology House, 24/26 Sadiku Street Ilasamaja, Off Isolo Express | Mushin         | Lagos |
| 4145 | LA/0313 | LA/0313/S/6  | May Clinics Limited                           |            | Doxology House, 24/26 Sadiku Street Ilasamaja, Off Isolo Express | Mushin         | Lagos |

|      |         |              |                                        |                       |                                                                  |              |       |
|------|---------|--------------|----------------------------------------|-----------------------|------------------------------------------------------------------|--------------|-------|
| 4146 | LA/0313 | LA/0313/S/5  | May Clinics Limited                    |                       | Doxology House, 24/26 Sadiku Street Ilasamaja, Off Isolo Express | Mushin       | Lagos |
| 4147 | LA/0314 | LA/0314/S/1  | Summit Hospital & Maternity Home       |                       | 5 Summit Close, Off Mosalashi B/Stop                             | Mushin       | Lagos |
| 4148 | LA/0314 | LA/0314/S/3  | Summit Hospital & Maternity Home       |                       | 5 Summit Close, Off Mosalashi B/Stop                             | Mushin       | Lagos |
| 4149 | LA/0327 | LA/0327/S/4  | Pharma-Flux Limited                    | Pharmacy              | 63, Ajose Str. Off Berlet Bus Stop Oshodi-Apapa Expressway       | Mushin       | Lagos |
| 4150 | LA/0328 | LA/0328/S/4  | Firm Pharmacy & Stores                 | Pharmacy              | 12 Sadiku Street, Sadiku Bus Stop Ilasamaja                      | Mushin       | Lagos |
| 4151 | LA/0329 | LA/0329/S/7  | Sanor Medical Services Ltd.            | Laboratory, Radiology | 77A Coker Road, Off Town Planning Way Ilupeju, Lagos             | Somolu       | Lagos |
| 4152 | LA/0329 | LA/0329/S/5  | Sanor Medical Services Ltd.            | Laboratory, Radiology | 77A Coker Road, Off Town Planning Way Ilupeju, Lagos             | Somolu       | Lagos |
| 4153 | LA/0332 | LA/0332/S/3  | Kiladejo Hospital & Specialist Clinics |                       | 15ppl Road Off Ppl Bus Stop Badagry Expressway Lagos             | Ojo          | Lagos |
| 4154 | LA/0332 | LA/0332/S/2  | Kiladejo Hospital & Specialist Clinics |                       | 15ppl Road Off Ppl Bus Stop Badagry Expressway Lagos             | Ojo          | Lagos |
| 4155 | LA/0332 | LA/0332/S/1  | Kiladejo Hospital & Specialist Clinics |                       | 15ppl Road Off Ppl Bus Stop Badagry Expressway Lagos             | Ojo          | Lagos |
| 4156 | LA/0340 | LA/0340/S/4  | Klemzy Pharmaceutical Ltd.             | Pharmacy              | 50, Badagary Expressway                                          | Ojo          | Lagos |
| 4157 | LA/0341 | LA/0341/S/4  | Ultima Pharmacy                        | Pharmacy              | 57, Ojo igbede Road By Sowemimo B/stop, Off Alabi int""I         | Ojo          | Lagos |
| 4158 | LA/0346 | LA/0346/S/7  | Kilad Merit Diagnostic Centre.         | Radiology, Laboratory | Casidy B/Stop,Badagry Express Way, Okokomaiko                    | Ojo          | Lagos |
| 4159 | LA/0346 | LA/0346/S/5  | Kilad Merit Diagnostic Centre.         | Radiology, Laboratory | Casidy B/Stop,Badagry Express Way, Okokomaiko                    | Ojo          | Lagos |
| 4160 | LA/0351 | LA/0351/S/1  | Dolu Hospital                          |                       | 7.Sunmola Abayomi Str. Motoluku Lagos                            | Oshodi/Isolo | Lagos |
| 4161 | LA/0351 | LA/0351/S/3  | Dolu Hospital                          |                       | 7.Sunmola Abayomi Str. Motoluku Lagos                            | Oshodi/Isolo | Lagos |
| 4162 | LA/0351 | LA/0351/S/5  | Dolu Hospital                          |                       | 7.Sunmola Abayomi Str. Motoluku Lagos                            | Oshodi/Isolo | Lagos |
| 4163 | LA/0354 | LA/0354/S/2  | Divine -Grace Medical Centre           |                       | 3 Sobogun Rofa Street, Mafoloku-Oshodi                           | Oshodi/Isolo | Lagos |
| 4164 | LA/0357 | LA/0357/S/6  | Geo Medical Centre                     |                       | 12 Subairu Street, Ladipo Bus Stop, Sogunle                      | Oshodi/Isolo | Lagos |
| 4165 | LA/0357 | LA/0357/S/2  | Geo Medical Centre                     |                       | 12 Subairu Street, Ladipo Bus Stop, Sogunle                      | Oshodi/Isolo | Lagos |
| 4166 | LA/0357 | LA/0357/S/3  | Geo Medical Centre                     |                       | 12 Subairu Street, Ladipo Bus Stop, Sogunle                      | Oshodi/Isolo | Lagos |
| 4167 | LA/0358 | LA/0358/S/3  | One Life Hospital Limited              |                       | 485 Agege Motor Road, Bolade, Oshodi                             | Oshodi/Isolo | Lagos |
| 4168 | LA/0358 | LA/0358/S/7  | One Life Hospital Limited              |                       | 485 Agege Motor Road, Bolade, Oshodi                             | Oshodi/Isolo | Lagos |
| 4169 | LA/0358 | LA/0358/S/8  | One Life Hospital Limited              |                       | 485 Agege Motor Road, Bolade, Oshodi                             | Oshodi/Isolo | Lagos |
| 4170 | LA/0358 | LA/0358/S/15 | One Life Hospital Limited              |                       | 485 Agege Motor Road, Bolade, Oshodi                             | Oshodi/Isolo | Lagos |
| 4171 | LA/0358 | LA/0358/S/2  | One Life Hospital Limited              |                       | 485 Agege Motor Road, Bolade, Oshodi                             | Oshodi/Isolo | Lagos |
| 4172 | LA/0358 | LA/0358/S/1  | One Life Hospital Limited              |                       | 485 Agege Motor Road, Bolade, Oshodi                             | Oshodi/Isolo | Lagos |
| 4173 | LA/0358 | LA/0358/S/6  | One Life Hospital Limited              |                       | 485 Agege Motor Road, Bolade, Oshodi                             | Oshodi/Isolo | Lagos |
| 4174 | LA/0358 | LA/0358/S/5  | One Life Hospital Limited              |                       | 485 Agege Motor Road, Bolade, Oshodi                             | Oshodi/Isolo | Lagos |
| 4175 | LA/0359 | LA/0359/S/8  | St. Emmanuel Clinics & Hospital        |                       | 2,Bola Ademuwon Street,Behind Aswani Market,Isolo                | Oshodi/Isolo | Lagos |
| 4176 | LA/0359 | LA/0359/S/3  | St. Emmanuel Clinics & Hospital        |                       | 2,Bola Ademuwon Street,Behind Aswani Market,Isolo                | Oshodi/Isolo | Lagos |
| 4177 | LA/0359 | LA/0359/S/5  | St. Emmanuel Clinics & Hospital        |                       | 2,Bola Ademuwon Street,Behind Aswani Market,Isolo                | Oshodi/Isolo | Lagos |
| 4178 | LA/0359 | LA/0359/S/6  | St. Emmanuel Clinics & Hospital        |                       | 2,Bola Ademuwon Street,Behind Aswani Market,Isolo                | Oshodi/Isolo | Lagos |
| 4179 | LA/0359 | LA/0359/S/7  | St. Emmanuel Clinics & Hospital        |                       | 2,Bola Ademuwon Street,Behind Aswani Market,Isolo                | Oshodi/Isolo | Lagos |
| 4180 | LA/0359 | LA/0359/S/1  | St. Emmanuel Clinics & Hospital        |                       | 2,Bola Ademuwon Street,Behind Aswani Market,Isolo                | Oshodi/Isolo | Lagos |
| 4181 | LA/0359 | LA/0359/S/4  | St. Emmanuel Clinics & Hospital        |                       | 2,Bola Ademuwon Street,Behind Aswani Market,Isolo                | Oshodi/Isolo | Lagos |

|      |         |              |                                   |            |                                                              |                |       |
|------|---------|--------------|-----------------------------------|------------|--------------------------------------------------------------|----------------|-------|
| 4182 | LA/0359 | LA/0359/S/11 | St. Emmanuel Clinics & Hospital   |            | 2,Bola Ademuwon Street,Behind Aswani Market,Isolo            | Oshodi/Isolo   | Lagos |
| 4183 | LA/0363 | LA/0363/S/5  | Bose Specialist Hospital          |            | 7,Ilori Street, Ire-Akari Estate, Isolo                      | Oshodi/Isolo   | Lagos |
| 4184 | LA/0365 | LA/0365/S/3  | Mount Pishgah Hospital Ltd.       |            | 140 Isolo Road, Egbe, Lagos State                            | Agege          | Lagos |
| 4185 | LA/0365 | LA/0365/S/1  | Mount Pishgah Hospital Ltd.       |            | 140 Isolo Road, Egbe, Lagos State                            | Agege          | Lagos |
| 4186 | LA/0368 | LA/0368/S/6  | Bissalam Hospital Complex         |            | 4, Modupe Shita Street, Off Liasu Road, Egbe                 | Oshodi/Isolo   | Lagos |
| 4187 | LA/0368 | LA/0368/S/8  | Bissalam Hospital Complex         |            | 4, Modupe Shita Street, Off Liasu Road, Egbe                 | Oshodi/Isolo   | Lagos |
| 4188 | LA/0368 | LA/0368/S/2  | Bissalam Hospital Complex         |            | 4, Modupe Shita Street, Off Liasu Road, Egbe                 | Oshodi/Isolo   | Lagos |
| 4189 | LA/0368 | LA/0368/S/5  | Bissalam Hospital Complex         |            | 4, Modupe Shita Street, Off Liasu Road, Egbe                 | Oshodi/Isolo   | Lagos |
| 4190 | LA/0368 | LA/0368/S/1  | Bissalam Hospital Complex         |            | 4, Modupe Shita Street, Off Liasu Road, Egbe                 | Oshodi/Isolo   | Lagos |
| 4191 | LA/0368 | LA/0368/S/3  | Bissalam Hospital Complex         |            | 4, Modupe Shita Street, Off Liasu Road, Egbe                 | Oshodi/Isolo   | Lagos |
| 4192 | LA/0370 | LA/0370/S/2  | General Hospital, Isolo           | -          | Isolo, Lagos                                                 | Oshodi/Isolo   | Lagos |
| 4193 | LA/0370 | LA/0370/S/4  | General Hospital, Isolo           | -          | Isolo, Lagos                                                 | Oshodi/Isolo   | Lagos |
| 4194 | LA/0370 | LA/0370/S/8  | General Hospital, Isolo           | -          | Isolo, Lagos                                                 | Oshodi/Isolo   | Lagos |
| 4195 | LA/0370 | LA/0370/S/3  | General Hospital, Isolo           | -          | Isolo, Lagos                                                 | Oshodi/Isolo   | Lagos |
| 4196 | LA/0370 | LA/0370/S/1  | General Hospital, Isolo           | -          | Isolo, Lagos                                                 | Oshodi/Isolo   | Lagos |
| 4197 | LA/0374 | LA/0374/S/4  | CRI Mediclinic Lekki Vgc          |            | Plot 232 Road 1 Vgc Lekki Epc Expressway Lagos               | Ibeju/Lekki    | Lagos |
| 4198 | LA/0374 | LA/0374/S/5  | CRI Mediclinic Lekki Vgc          |            | Plot 232 Road 1 Vgc Lekki Epc Expressway Lagos               | Ibeju/Lekki    | Lagos |
| 4199 | LA/0374 | LA/0374/S/14 | CRI Mediclinic Lekki Vgc          |            | Plot 232 Road 1 Vgc Lekki Epc Expressway Lagos               | Ibeju/Lekki    | Lagos |
| 4200 | LA/0374 | LA/0374/S/7  | CRI Mediclinic Lekki Vgc          |            | Plot 232 Road 1 Vgc Lekki Epc Expressway Lagos               | Ibeju/Lekki    | Lagos |
| 4201 | LA/0376 | LA/0376/S/5  | Adonai Medical Centre             |            | No. 36 Adekunle Kuye Street, Lagos.                          | Surulere       | Lagos |
| 4202 | LA/0381 | LA/0381/S/4  | Hasmut Nig. Ltd Pharmacy          | Pharmacy   | Ikolun Shopping Centre, 27 Ijegun Road Ikotun                | Oshodi/Isolo   | Lagos |
| 4203 | LA/0382 | LA/0382/S/4  | Calson Pharmaceutical Stores Ltd. | Pharmacy   | 3, Oyegoke Str. Orile, Oshodi                                | Oshodi/Isolo   | Lagos |
| 4204 | LA/0385 | LA/0385/S/4  | Prime Pharmaceuticals             | Pharmacy   | 7, Ire Akari Estate Road Isolo Lagos                         | Oshodi/Isolo   | Lagos |
| 4205 | LA/0387 | LA/0387/S/4  | Acorn Pharmacy & Stores           | Pharmacy   | 55, Idimu Road, Chemist Bus Stop Ejibbo                      | Oshodi/Isolo   | Lagos |
| 4206 | LA/0389 | LA/0389/S/4  | Goshen Konsult Ltd                | Pharmacy   | 122, Mushin Rd, Isolo                                        | Oshodi/Isolo   | Lagos |
| 4207 | LA/0390 | LA/0390/S/4  | Stella-Charlse Pharmacy           | Pharmacy   | 45a Okota Rd                                                 | Oshodi/Isolo   | Lagos |
| 4208 | LA/0391 | LA/0391/S/4  | Akugbe Pharmacy                   | Pharmacy   | 2, Olorunfemi kolawole Str. Okota-isolo                      | Oshodi/Isolo   | Lagos |
| 4209 | LA/0394 | LA/0394/S/5  | Khan Specialist Hospital          | Laboratory | 33/35 Harisson Sholaya Avenue, Okota, Isolo                  | Oshodi/Isolo   | Lagos |
| 4210 | LA/0402 | LA/0402/S/3  | Medol Clinic                      |            | 54,Adaranyo Street,Famous B/Stop,(Opp Pedro Pri.Sch.)Shomolu | Somolu         | Lagos |
| 4211 | LA/0403 | LA/0403/S/7  | General Hospital Gbagada          |            | Gbagada                                                      | Somolu         | Lagos |
| 4212 | LA/0403 | LA/0403/S/3  | General Hospital Gbagada          |            | Gbagada                                                      | Somolu         | Lagos |
| 4213 | LA/0403 | LA/0403/S/15 | General Hospital Gbagada          |            | Gbagada                                                      | Somolu         | Lagos |
| 4214 | LA/0403 | LA/0403/S/8  | General Hospital Gbagada          |            | Gbagada                                                      | Somolu         | Lagos |
| 4215 | LA/0403 | LA/0403/S/4  | General Hospital Gbagada          |            | Gbagada                                                      | Somolu         | Lagos |
| 4216 | LA/0403 | LA/0403/S/5  | General Hospital Gbagada          |            | Gbagada                                                      | Somolu         | Lagos |
| 4217 | LA/0403 | LA/0403/S/2  | General Hospital Gbagada          |            | Gbagada                                                      | Somolu         | Lagos |
| 4218 | LA/0403 | LA/0403/S/1  | General Hospital Gbagada          |            | Gbagada                                                      | Somolu         | Lagos |
| 4219 | LA/0403 | LA/0403/S/6  | General Hospital Gbagada          |            | Gbagada                                                      | Somolu         | Lagos |
| 4220 | LA/0403 | LA/0403/S/12 | General Hospital Gbagada          |            | Gbagada                                                      | Somolu         | Lagos |
| 4221 | LA/0409 | LA/0409/S/4  | Casann Pharm. Ltd.                | Pharmacy   | 38, Oworo Road, Oworonsoki                                   | Kosofe         | Lagos |
| 4222 | LA/0410 | LA/0410/S/5  | Health Function Laboratory        | Laboratory | 8, Gbadebo Street, Ojota                                     | Kosofe         | Lagos |
| 4223 | LA/0415 | LA/0415/S/5  | Akoka Diagnostics Centre          | Laboratory | 63 St. Finbirr College Rd. Akoka                             | Lagos Mainland | Lagos |
| 4224 | LA/0416 | LA/0416/S/8  | Jon-dental Clinic                 | Dental     | 20, Shobande St., Akoka Yaba                                 | Lagos Mainland | Lagos |



|      |         |              |                                      |               |                                                                                   |          |       |
|------|---------|--------------|--------------------------------------|---------------|-----------------------------------------------------------------------------------|----------|-------|
| 4225 | LA/0429 | LA/0429/S/1  | Olaniba Mem. Spec. Hospital          |               | 10a Olatunde Onimole Street, Surulere, Lagos                                      | Surulere | Lagos |
| 4226 | LA/0429 | LA/0429/S/3  | Olaniba Mem. Spec. Hospital          |               | 10a Olatunde Onimole Street, Surulere, Lagos                                      | Surulere | Lagos |
| 4227 | LA/0431 | LA/0431/S/3  | Isioma Hospital                      |               | 28, Molusi Avenue Ikate, Surulere, Lagos                                          | Surulere | Lagos |
| 4228 | LA/0435 | LA/0435/S/8  | Mercy Thomas Oredugba Medical Centre |               | 8, Mogaji Street, Aguda, Surulere, Lagos                                          | Surulere | Lagos |
| 4229 | LA/0438 | LA/0438/S/5  | St. Luke's Medical Centre            |               | 61 Teniola Street off Adeshina Street, by Airways Link Road, Ijeshatedo, Surulere | Surulere | Lagos |
| 4230 | LA/0438 | LA/0438/S/1  | St. Luke's Medical Centre            |               | 61 Teniola Street off Adeshina Street, by Airways Link Road, Ijeshatedo, Surulere | Surulere | Lagos |
| 4231 | LA/0438 | LA/0438/S/3  | St. Luke's Medical Centre            |               | 61 Teniola Street off Adeshina Street, by Airways Link Road, Ijeshatedo, Surulere | Surulere | Lagos |
| 4232 | LA/0444 | LA/0444/S/3  | Smith Medical Centre                 |               | 3 Eniasoro Beyioku Street, Surulere                                               | Surulere | Lagos |
| 4233 | LA/0447 | LA/0447/S/1  | Model Specialist Hospital            |               | 5 Tafawa Balewa Crescent Off Adeniran Ogunsanya                                   | Surulere | Lagos |
| 4234 | LA/0447 | LA/0447/S/3  | Model Specialist Hospital            |               | 5 Tafawa Balewa Crescent Off Adeniran Ogunsanya                                   | Surulere | Lagos |
| 4235 | LA/0447 | LA/0447/S/14 | Model Specialist Hospital            |               | 5 Tafawa Balewa Crescent Off Adeniran Ogunsanya                                   | Surulere | Lagos |
| 4236 | LA/0447 | LA/0447/S/10 | Model Specialist Hospital            |               | 5 Tafawa Balewa Crescent Off Adeniran Ogunsanya                                   | Surulere | Lagos |
| 4237 | LA/0448 | LA/0448/S/5  | First Dominican Hospital Ltd         |               | 27, Alhaji Masha Road, Surulere, Lagos.                                           | Surulere | Lagos |
| 4238 | LA/0450 | LA/0450/S/5  | Mezonel Hospital                     |               | 1 Adetola Street, Aguda-Surulere, Lagos.                                          | Surulere | Lagos |
| 4239 | LA/0450 | LA/0450/S/14 | Mezonel Hospital                     |               | 1 Adetola Street, Aguda-Surulere, Lagos.                                          | Surulere | Lagos |
| 4240 | LA/0455 | LA/0455/S/1  | Robertson Med. Centre                |               | 1-5 James Robertson Street, Surulere, Lagos                                       | Surulere | Lagos |
| 4241 | LA/0455 | LA/0455/S/2  | Robertson Med. Centre                |               | 1-5 James Robertson Street, Surulere, Lagos                                       | Surulere | Lagos |
| 4242 | LA/0455 | LA/0455/S/3  | Robertson Med. Centre                |               | 1-5 James Robertson Street, Surulere, Lagos                                       | Surulere | Lagos |
| 4243 | LA/0456 | LA/0456/S/5  | Uwemedimo Hospital Ltd               |               | 19 Market Street, Ijeshata - Surulere, Lagos                                      | Surulere | Lagos |
| 4244 | LA/0457 | LA/0457/S/3  | New day Specialist Clinic Ltd.,      |               | 2, Ladele Street, Off Nnobi Street, Ikate, Surulere, Lagos                        | Surulere | Lagos |
| 4245 | LA/0457 | LA/0457/S/1  | New day Specialist Clinic Ltd.,      |               | 2, Ladele Street, Off Nnobi Street, Ikate, Surulere, Lagos                        | Surulere | Lagos |
| 4246 | LA/0457 | LA/0457/S/7  | New day Specialist Clinic Ltd.,      |               | 2, Ladele Street, Off Nnobi Street, Ikate, Surulere, Lagos                        | Surulere | Lagos |
| 4247 | LA/0457 | LA/0457/S/5  | New day Specialist Clinic Ltd.,      |               | 2, Ladele Street, Off Nnobi Street, Ikate, Surulere, Lagos                        | Surulere | Lagos |
| 4248 | LA/0457 | LA/0457/S/2  | New day Specialist Clinic Ltd.,      |               | 2, Ladele Street, Off Nnobi Street, Ikate, Surulere, Lagos                        | Surulere | Lagos |
| 4249 | LA/0457 | LA/0457/S/8  | New day Specialist Clinic Ltd.,      |               | 2, Ladele Street, Off Nnobi Street, Ikate, Surulere, Lagos                        | Surulere | Lagos |
| 4250 | LA/0457 | LA/0457/S/6  | New day Specialist Clinic Ltd.,      |               | 2, Ladele Street, Off Nnobi Street, Ikate, Surulere, Lagos                        | Surulere | Lagos |
| 4251 | LA/0459 | LA/0459/S/2  | Remilekun Memorial Medical Centre    |               | 29A Itire Road, Surulere, Lagos                                                   | Surulere | Lagos |
| 4252 | LA/0460 | LA/0460/S/2  | Topaz Hospital                       |               | 12, Adeniyi Street, By Municipal Library, Lagos                                   | Surulere | Lagos |
| 4253 | LA/0460 | LA/0460/S/5  | Topaz Hospital                       |               | 12, Adeniyi Street, By Municipal Library, Lagos                                   | Surulere | Lagos |
| 4254 | LA/0460 | LA/0460/S/1  | Topaz Hospital                       |               | 12, Adeniyi Street, By Municipal Library, Lagos                                   | Surulere | Lagos |
| 4255 | LA/0463 | LA/0463/S/4  | Atoms Medical Laboratories Ltd.      | Pharmacy      | 12 Abiona Close, Off Fololu Road Surulere                                         | Surulere | Lagos |
| 4256 | LA/0465 | LA/0465/S/3  | Dr. J.I.T.O. Unokanjo                | O & G         | Surulere Lagos                                                                    | Surulere | Lagos |
| 4257 | LA/0467 | LA/0467/S/15 | Merion Eye Clinic Ltd.               | Ophthalmology | 30. Banire street, off cole st. off Mabo st. surulere                             | Surulere | Lagos |
| 4258 | LA/0474 | LA/0474/S/4  | Ben-zyk Pharmacy                     | Pharmacy      | 31, Sanusi Str. Off Ogunlana Bus-stop                                             | Surulere | Lagos |
| 4259 | LA/0475 | LA/0475/S/4  | Devine Care Pharmacy                 | Pharmacy      | 27, Akerele Str. Surulere                                                         | Surulere | Lagos |
| 4260 | LA/0478 | LA/0478/S/4  | Jenkins Pharmacy & Stores            | Pharmacy      | 17, Ojuelegba Road, Surulere                                                      | Surulere | Lagos |

|      |         |              |                                    |          |                                                                         |                |       |
|------|---------|--------------|------------------------------------|----------|-------------------------------------------------------------------------|----------------|-------|
| 4261 | LA/0479 | LA/0479/S/4  | Claoric Pharm. & Stores            | Pharmacy | 76, Bode Thomas Street, Surulere                                        | Surulere       | Lagos |
| 4262 | LA/0481 | LA/0481/S/4  | Vita Chemists Ltd.                 | Pharmacy | 75, Tejuosho Street, Surulere                                           | Surulere       | Lagos |
| 4263 | LA/0484 | LA/0484/S/4  | Udez Chemists Ltd.                 | Pharmacy | 120 Ojuelegba Road, Surulere                                            | Surulere       | Lagos |
| 4264 | LA/0487 | LA/0487/S/4  | Providence Pharmacy.               | Pharmacy | 77 Itire Road, Surulere                                                 | Surulere       | Lagos |
| 4265 | LA/0489 | LA/0489/S/4  | Lastdays Pharmacy                  | Pharmacy | 15, Abiodun Wright Ave., Ikate, Surulere                                | Surulere       | Lagos |
| 4266 | LA/0492 | LA/0492/S/3  | Living Spring Hospital & Mat. Home |          | 49, Alafia Avenue Off Afolabi Obe Street Ori-Oke B/Stop                 | Oshodi/Isolo   | Lagos |
| 4267 | LA/0493 | LA/0493/S/4  | Chi Pharmaceutiacal Ltd.           | Pharmacy | Lagos                                                                   | Lagos Mainland | Lagos |
| 4268 | LA/0494 | LA/0494/S/12 | Phonics Hearing centre             |          | 286A, Corporation Drive, Dolphin Estate, Ikoyi.                         | Eti-Osa        | Lagos |
| 4269 | LA/0502 | LA/0502/S/5  | BCL Clinic                         |          | 10, MacDonald Road, Ikoyi, Lagos                                        | Eti-Osa        | Lagos |
| 4270 | LA/0502 | LA/0502/S/4  | BCL Clinic                         |          | 10, MacDonald Road, Ikoyi, Lagos                                        | Eti-Osa        | Lagos |
| 4271 | LA/0510 | LA/0510/S/5  | 445 Nigerian Airforce Hospital     |          | Sam Ewang Air Force Base, Ikeja                                         | Ikeja          | Lagos |
| 4272 | LA/0510 | LA/0510/S/8  | 445 Nigerian Airforce Hospital     |          | Sam Ewang Air Force Base, Ikeja                                         | Ikeja          | Lagos |
| 4273 | LA/0510 | LA/0510/S/15 | 445 Nigerian Airforce Hospital     |          | Sam Ewang Air Force Base, Ikeja                                         | Ikeja          | Lagos |
| 4274 | LA/0510 | LA/0510/S/2  | 445 Nigerian Airforce Hospital     |          | Sam Ewang Air Force Base, Ikeja                                         | Ikeja          | Lagos |
| 4275 | LA/0510 | LA/0510/S/3  | 445 Nigerian Airforce Hospital     |          | Sam Ewang Air Force Base, Ikeja                                         | Ikeja          | Lagos |
| 4276 | LA/0510 | LA/0510/S/10 | 445 Nigerian Airforce Hospital     |          | Sam Ewang Air Force Base, Ikeja                                         | Ikeja          | Lagos |
| 4277 | LA/0510 | LA/0510/S/1  | 445 Nigerian Airforce Hospital     |          | Sam Ewang Air Force Base, Ikeja                                         | Ikeja          | Lagos |
| 4278 | LA/0510 | LA/0510/S/11 | 445 Nigerian Airforce Hospital     |          | Sam Ewang Air Force Base, Ikeja                                         | Ikeja          | Lagos |
| 4279 | LA/0510 | LA/0510/S/12 | 445 Nigerian Airforce Hospital     |          | Sam Ewang Air Force Base, Ikeja                                         | Ikeja          | Lagos |
| 4280 | LA/0510 | LA/0510/S/7  | 445 Nigerian Airforce Hospital     |          | Sam Ewang Air Force Base, Ikeja                                         | Ikeja          | Lagos |
| 4281 | LA/0510 | LA/0510/S/4  | 445 Nigerian Airforce Hospital     |          | Sam Ewang Air Force Base, Ikeja                                         | Ikeja          | Lagos |
| 4282 | LA/0510 | LA/0510/S/6  | 445 Nigerian Airforce Hospital     |          | Sam Ewang Air Force Base, Ikeja                                         | Ikeja          | Lagos |
| 4283 | LA/0524 | LA/0524/S/4  | Lagoon Clinic                      |          | 11A, Idejo Street, V/Island, Lagos                                      | Eti-Osa        | Lagos |
| 4284 | LA/0524 | LA/0524/S/5  | Lagoon Clinic                      |          | 11A, Idejo Street, V/Island, Lagos                                      | Eti-Osa        | Lagos |
| 4285 | LA/0526 | LA/0526/S/5  | Lagoon Hospital, Ikeja             |          | 97/101 Obafemi Awolowo Way, Ikeja.                                      | Ikeja          | Lagos |
| 4286 | LA/0526 | LA/0526/S/4  | Lagoon Hospital, Ikeja             |          | 97/101 Obafemi Awolowo Way, Ikeja.                                      | Ikeja          | Lagos |
| 4287 | LA/0526 | LA/0526/S/7  | Lagoon Hospital, Ikeja             |          | 97/101 Obafemi Awolowo Way, Ikeja.                                      | Ikeja          | Lagos |
| 4288 | LA/0529 | LA/0529/S/4  | Kupa Medical Centre Ltd            |          | 4, Lateef Salami Street, Off M/M In""tl Airport Rd. Ajao Estate, Lagos. | Oshodi/Isolo   | Lagos |
| 4289 | LA/0535 | LA/0535/S/7  | Osuntuyi Medical Centre, Obanikoro |          | 6, Alh. Salisu Street, Obanikoro, Lagos.                                | Mushin         | Lagos |
| 4290 | LA/0535 | LA/0535/S/2  | Osuntuyi Medical Centre, Obanikoro |          | 6, Alh. Salisu Street, Obanikoro, Lagos.                                | Mushin         | Lagos |
| 4291 | LA/0535 | LA/0535/S/4  | Osuntuyi Medical Centre, Obanikoro |          | 6, Alh. Salisu Street, Obanikoro, Lagos.                                | Mushin         | Lagos |
| 4292 | LA/0535 | LA/0535/S/1  | Osuntuyi Medical Centre, Obanikoro |          | 6, Alh. Salisu Street, Obanikoro, Lagos.                                | Mushin         | Lagos |
| 4293 | LA/0535 | LA/0535/S/5  | Osuntuyi Medical Centre, Obanikoro |          | 6, Alh. Salisu Street, Obanikoro, Lagos.                                | Mushin         | Lagos |
| 4294 | LA/0535 | LA/0535/S/3  | Osuntuyi Medical Centre, Obanikoro |          | 6, Alh. Salisu Street, Obanikoro, Lagos.                                | Mushin         | Lagos |
| 4295 | LA/0539 | LA/0539/S/3  | Crystal Specialist Hospital        |          | 148, Akowonjo Road, Dopemu, Lagos.                                      | Agege          | Lagos |
| 4296 | LA/0539 | LA/0539/S/4  | Crystal Specialist Hospital        |          | 148, Akowonjo Road, Dopemu, Lagos.                                      | Agege          | Lagos |
| 4297 | LA/0539 | LA/0539/S/7  | Crystal Specialist Hospital        |          | 148, Akowonjo Road, Dopemu, Lagos.                                      | Agege          | Lagos |
| 4298 | LA/0539 | LA/0539/S/5  | Crystal Specialist Hospital        |          | 148, Akowonjo Road, Dopemu, Lagos.                                      | Agege          | Lagos |
| 4299 | LA/0541 | LA/0541/S/7  | Faith City Hospital, Ajao -estate  |          | 16, Asa-Afariogun Street, Off Osolo Way, Ajao Estate, Lagos.            | Oshodi/Isolo   | Lagos |
| 4300 | LA/0541 | LA/0541/S/5  | Faith City Hospital, Ajao -estate  |          | 16, Asa-Afariogun Street, Off Osolo Way, Ajao Estate, Lagos.            | Oshodi/Isolo   | Lagos |
| 4301 | LA/0543 | LA/0543/S/5  | Faith City Hospital, V/I           |          | 2B, Oko-Awo Close, V/Island, Lagos                                      | Eti-Osa        | Lagos |
| 4302 | LA/0543 | LA/0543/S/7  | Faith City Hospital, V/I           |          | 2B, Oko-Awo Close, V/Island, Lagos                                      | Eti-Osa        | Lagos |

|      |         |              |                                   |  |                                                                |              |       |
|------|---------|--------------|-----------------------------------|--|----------------------------------------------------------------|--------------|-------|
| 4303 | LA/0545 | LA/0545/S/10 | R-Jolad Hospital                  |  | 1, Akinyede Street, By New Garage, Bariga, Lagos.              | Kosofe       | Lagos |
| 4304 | LA/0545 | LA/0545/S/2  | R-Jolad Hospital                  |  | 1, Akinyede Street, By New Garage, Bariga, Lagos.              | Kosofe       | Lagos |
| 4305 | LA/0545 | LA/0545/S/8  | R-Jolad Hospital                  |  | 1, Akinyede Street, By New Garage, Bariga, Lagos.              | Kosofe       | Lagos |
| 4306 | LA/0545 | LA/0545/S/6  | R-Jolad Hospital                  |  | 1, Akinyede Street, By New Garage, Bariga, Lagos.              | Kosofe       | Lagos |
| 4307 | LA/0545 | LA/0545/S/12 | R-Jolad Hospital                  |  | 1, Akinyede Street, By New Garage, Bariga, Lagos.              | Kosofe       | Lagos |
| 4308 | LA/0545 | LA/0545/S/11 | R-Jolad Hospital                  |  | 1, Akinyede Street, By New Garage, Bariga, Lagos.              | Kosofe       | Lagos |
| 4309 | LA/0545 | LA/0545/S/3  | R-Jolad Hospital                  |  | 1, Akinyede Street, By New Garage, Bariga, Lagos.              | Kosofe       | Lagos |
| 4310 | LA/0545 | LA/0545/S/7  | R-Jolad Hospital                  |  | 1, Akinyede Street, By New Garage, Bariga, Lagos.              | Kosofe       | Lagos |
| 4311 | LA/0545 | LA/0545/S/5  | R-Jolad Hospital                  |  | 1, Akinyede Street, By New Garage, Bariga, Lagos.              | Kosofe       | Lagos |
| 4312 | LA/0545 | LA/0545/S/1  | R-Jolad Hospital                  |  | 1, Akinyede Street, By New Garage, Bariga, Lagos.              | Kosofe       | Lagos |
| 4313 | LA/0545 | LA/0545/S/4  | R-Jolad Hospital                  |  | 1, Akinyede Street, By New Garage, Bariga, Lagos.              | Kosofe       | Lagos |
| 4314 | LA/0549 | LA/0549/S/1  | Heals Specialist Hospital         |  | 40B, Godwin Omonua Street, Irekari Estate.                     | Oshodi/Isolo | Lagos |
| 4315 | LA/0552 | LA/0552/S/2  | Healing Cross Hospital Ltd        |  | 34, Apena Street, Okota Isolo, Lagos                           | Oshodi/Isolo | Lagos |
| 4316 | LA/0552 | LA/0552/S/3  | Healing Cross Hospital Ltd        |  | 34, Apena Street, Okota Isolo, Lagos                           | Oshodi/Isolo | Lagos |
| 4317 | LA/0554 | LA/0554/S/5  | Krown Hospital & Maternity Centre |  | 11, Alhaji Sekoni Street, Off Alimosho Rd, Iyana-Ipaja, Lagos. | Alimosho     | Lagos |
| 4318 | LA/0554 | LA/0554/S/12 | Krown Hospital & Maternity Centre |  | 11, Alhaji Sekoni Street, Off Alimosho Rd, Iyana-Ipaja, Lagos. | Alimosho     | Lagos |
| 4319 | LA/0554 | LA/0554/S/6  | Krown Hospital & Maternity Centre |  | 11, Alhaji Sekoni Street, Off Alimosho Rd, Iyana-Ipaja, Lagos. | Alimosho     | Lagos |
| 4320 | LA/0554 | LA/0554/S/3  | Krown Hospital & Maternity Centre |  | 11, Alhaji Sekoni Street, Off Alimosho Rd, Iyana-Ipaja, Lagos. | Alimosho     | Lagos |
| 4321 | LA/0554 | LA/0554/S/10 | Krown Hospital & Maternity Centre |  | 11, Alhaji Sekoni Street, Off Alimosho Rd, Iyana-Ipaja, Lagos. | Alimosho     | Lagos |
| 4322 | LA/0554 | LA/0554/S/7  | Krown Hospital & Maternity Centre |  | 11, Alhaji Sekoni Street, Off Alimosho Rd, Iyana-Ipaja, Lagos. | Alimosho     | Lagos |
| 4323 | LA/0554 | LA/0554/S/1  | Krown Hospital & Maternity Centre |  | 11, Alhaji Sekoni Street, Off Alimosho Rd, Iyana-Ipaja, Lagos. | Alimosho     | Lagos |
| 4324 | LA/0557 | LA/0557/S/2  | Legus Specialist Hospital         |  | 34 Akorohunfayo Street, Ikorodu Rd., Igbobi, Lagos             | Mushin       | Lagos |
| 4325 | LA/0557 | LA/0557/S/1  | Legus Specialist Hospital         |  | 34 Akorohunfayo Street, Ikorodu Rd., Igbobi, Lagos             | Mushin       | Lagos |
| 4326 | LA/0557 | LA/0557/S/10 | Legus Specialist Hospital         |  | 34 Akorohunfayo Street, Ikorodu Rd., Igbobi, Lagos             | Mushin       | Lagos |
| 4327 | LA/0557 | LA/0557/S/5  | Legus Specialist Hospital         |  | 34 Akorohunfayo Street, Ikorodu Rd., Igbobi, Lagos             | Mushin       | Lagos |
| 4328 | LA/0557 | LA/0557/S/11 | Legus Specialist Hospital         |  | 34 Akorohunfayo Street, Ikorodu Rd., Igbobi, Lagos             | Mushin       | Lagos |
| 4329 | LA/0557 | LA/0557/S/3  | Legus Specialist Hospital         |  | 34 Akorohunfayo Street, Ikorodu Rd., Igbobi, Lagos             | Mushin       | Lagos |
| 4330 | LA/0557 | LA/0557/S/6  | Legus Specialist Hospital         |  | 34 Akorohunfayo Street, Ikorodu Rd., Igbobi, Lagos             | Mushin       | Lagos |
| 4331 | LA/0561 | LA/0561/S/7  | Lagos Univ. Teach. Hosp.          |  | Idiaraba, Lagos                                                | Mushin       | Lagos |
| 4332 | LA/0561 | LA/0561/S/3  | Lagos Univ. Teach. Hosp.          |  | Idiaraba, Lagos                                                | Mushin       | Lagos |
| 4333 | LA/0561 | LA/0561/S/8  | Lagos Univ. Teach. Hosp.          |  | Idiaraba, Lagos                                                | Mushin       | Lagos |
| 4334 | LA/0561 | LA/0561/S/6  | Lagos Univ. Teach. Hosp.          |  | Idiaraba, Lagos                                                | Mushin       | Lagos |

|      |         |              |                                        |          |                                                                      |                |       |
|------|---------|--------------|----------------------------------------|----------|----------------------------------------------------------------------|----------------|-------|
| 4335 | LA/0561 | LA/0561/S/15 | Lagos Univ. Teach. Hosp.               |          | Idiaraba, Lagos                                                      | Mushin         | Lagos |
| 4336 | LA/0561 | LA/0561/S/4  | Lagos Univ. Teach. Hosp.               |          | Idiaraba, Lagos                                                      | Mushin         | Lagos |
| 4337 | LA/0561 | LA/0561/S/2  | Lagos Univ. Teach. Hosp.               |          | Idiaraba, Lagos                                                      | Mushin         | Lagos |
| 4338 | LA/0561 | LA/0561/S/12 | Lagos Univ. Teach. Hosp.               |          | Idiaraba, Lagos                                                      | Mushin         | Lagos |
| 4339 | LA/0561 | LA/0561/S/10 | Lagos Univ. Teach. Hosp.               |          | Idiaraba, Lagos                                                      | Mushin         | Lagos |
| 4340 | LA/0561 | LA/0561/S/5  | Lagos Univ. Teach. Hosp.               |          | Idiaraba, Lagos                                                      | Mushin         | Lagos |
| 4341 | LA/0561 | LA/0561/S/1  | Lagos Univ. Teach. Hosp.               |          | Idiaraba, Lagos                                                      | Mushin         | Lagos |
| 4342 | LA/0561 | LA/0561/S/11 | Lagos Univ. Teach. Hosp.               |          | Idiaraba, Lagos                                                      | Mushin         | Lagos |
| 4343 | LA/0562 | LA/0562/S/1  | Lagos Island Maternity Hosp.           |          | Broad Street, Lagos                                                  | Eti-Osa        | Lagos |
| 4344 | LA/0562 | LA/0562/S/4  | Lagos Island Maternity Hosp.           |          | Broad Street, Lagos                                                  | Eti-Osa        | Lagos |
| 4345 | LA/0562 | LA/0562/S/3  | Lagos Island Maternity Hosp.           |          | Broad Street, Lagos                                                  | Eti-Osa        | Lagos |
| 4346 | LA/0562 | LA/0562/S/6  | Lagos Island Maternity Hosp.           |          | Broad Street, Lagos                                                  | Eti-Osa        | Lagos |
| 4347 | LA/0562 | LA/0562/S/5  | Lagos Island Maternity Hosp.           |          | Broad Street, Lagos                                                  | Eti-Osa        | Lagos |
| 4348 | LA/0563 | LA/0563/S/3  | Lagos State University Teach. Hospital |          | Ikeja, Lagos State                                                   | Ikeja          | Lagos |
| 4349 | LA/0563 | LA/0563/S/5  | Lagos State University Teach. Hospital |          | Ikeja, Lagos State                                                   | Ikeja          | Lagos |
| 4350 | LA/0563 | LA/0563/S/15 | Lagos State University Teach. Hospital |          | Ikeja, Lagos State                                                   | Ikeja          | Lagos |
| 4351 | LA/0563 | LA/0563/S/9  | Lagos State University Teach. Hospital |          | Ikeja, Lagos State                                                   | Ikeja          | Lagos |
| 4352 | LA/0563 | LA/0563/S/12 | Lagos State University Teach. Hospital |          | Ikeja, Lagos State                                                   | Ikeja          | Lagos |
| 4353 | LA/0563 | LA/0563/S/8  | Lagos State University Teach. Hospital |          | Ikeja, Lagos State                                                   | Ikeja          | Lagos |
| 4354 | LA/0563 | LA/0563/S/7  | Lagos State University Teach. Hospital |          | Ikeja, Lagos State                                                   | Ikeja          | Lagos |
| 4355 | LA/0563 | LA/0563/S/2  | Lagos State University Teach. Hospital |          | Ikeja, Lagos State                                                   | Ikeja          | Lagos |
| 4356 | LA/0563 | LA/0563/S/6  | Lagos State University Teach. Hospital |          | Ikeja, Lagos State                                                   | Ikeja          | Lagos |
| 4357 | LA/0563 | LA/0563/S/11 | Lagos State University Teach. Hospital |          | Ikeja, Lagos State                                                   | Ikeja          | Lagos |
| 4358 | LA/0563 | LA/0563/S/4  | Lagos State University Teach. Hospital |          | Ikeja, Lagos State                                                   | Ikeja          | Lagos |
| 4359 | LA/0563 | LA/0563/S/1  | Lagos State University Teach. Hospital |          | Ikeja, Lagos State                                                   | Ikeja          | Lagos |
| 4360 | LA/0564 | LA/0564/S/4  | Lagos State General Hospital           |          | Broad Street, Lagos.                                                 | Lagos Island   | Lagos |
| 4361 | LA/0564 | LA/0564/S/12 | Lagos State General Hospital           |          | Broad Street, Lagos.                                                 | Lagos Island   | Lagos |
| 4362 | LA/0564 | LA/0564/S/7  | Lagos State General Hospital           |          | Broad Street, Lagos.                                                 | Lagos Island   | Lagos |
| 4363 | LA/0564 | LA/0564/S/1  | Lagos State General Hospital           |          | Broad Street, Lagos.                                                 | Lagos Island   | Lagos |
| 4364 | LA/0564 | LA/0564/S/8  | Lagos State General Hospital           |          | Broad Street, Lagos.                                                 | Lagos Island   | Lagos |
| 4365 | LA/0564 | LA/0564/S/5  | Lagos State General Hospital           |          | Broad Street, Lagos.                                                 | Lagos Island   | Lagos |
| 4366 | LA/0565 | LA/0565/S/4  | Health Plus                            | Pharmacy | 21, Joel Ogunnaike Street, Off Mobolaji Bank, Ikeja, Lagos.          | Ikeja          | Lagos |
| 4367 | LA/0566 | LA/0566/S/1  | Elegbeleye Specialist Hospital         |          | 1, Elegbeleye Street, Ikosi-Ketu, Lagos                              | Kosofe         | Lagos |
| 4368 | LA/0569 | LA/0569/S/3  | Alheri Hospital                        |          | 10, Ojodu Abiodun Road, Off Kosoko Road, Berger B/Stop, Ojodu, Lagos | Ikeja          | Lagos |
| 4369 | LA/0569 | LA/0569/S/1  | Alheri Hospital                        |          | 10, Ojodu Abiodun Road, Off Kosoko Road, Berger B/Stop, Ojodu, Lagos | Ikeja          | Lagos |
| 4370 | LA/0586 | LA/0586/S/5  | University of Lagos Health Centre      |          | Yaba, Lagos State                                                    | Lagos Mainland | Lagos |
| 4371 | LA/0586 | LA/0586/S/4  | University of Lagos Health Centre      |          | Yaba, Lagos State                                                    | Lagos Mainland | Lagos |

|      |         |              |                                              |         |                                                          |         |       |
|------|---------|--------------|----------------------------------------------|---------|----------------------------------------------------------|---------|-------|
| 4372 | LA/0588 | LA/0588/S/3  | Police Hospital, Falomo                      |         | Ikoyi, Lagos                                             | Eti-Osa | Lagos |
| 4373 | LA/0588 | LA/0588/S/4  | Police Hospital, Falomo                      |         | Ikoyi, Lagos                                             | Eti-Osa | Lagos |
| 4374 | LA/0588 | LA/0588/S/5  | Police Hospital, Falomo                      |         | Ikoyi, Lagos                                             | Eti-Osa | Lagos |
| 4375 | LA/0588 | LA/0588/S/8  | Police Hospital, Falomo                      |         | Ikoyi, Lagos                                             | Eti-Osa | Lagos |
| 4376 | LA/0588 | LA/0588/S/13 | Police Hospital, Falomo                      |         | Ikoyi, Lagos                                             | Eti-Osa | Lagos |
| 4377 | LA/0588 | LA/0588/S/15 | Police Hospital, Falomo                      |         | Ikoyi, Lagos                                             | Eti-Osa | Lagos |
| 4378 | LA/0588 | LA/0588/S/2  | Police Hospital, Falomo                      |         | Ikoyi, Lagos                                             | Eti-Osa | Lagos |
| 4379 | LA/0588 | LA/0588/S/1  | Police Hospital, Falomo                      |         | Ikoyi, Lagos                                             | Eti-Osa | Lagos |
| 4380 | LA/0588 | LA/0588/S/7  | Police Hospital, Falomo                      |         | Ikoyi, Lagos                                             | Eti-Osa | Lagos |
| 4381 | LA/0589 | LA/0589/S/3  | Cottage Hospital/Comprehensive Health Centre |         | Police College, Ikeja, Lagos State                       | Ikeja   | Lagos |
| 4382 | LA/0589 | LA/0589/S/15 | Cottage Hospital/Comprehensive Health Centre |         | Police College, Ikeja, Lagos State                       | Ikeja   | Lagos |
| 4383 | LA/0589 | LA/0589/S/4  | Cottage Hospital/Comprehensive Health Centre |         | Police College, Ikeja, Lagos State                       | Ikeja   | Lagos |
| 4384 | LA/0589 | LA/0589/S/7  | Cottage Hospital/Comprehensive Health Centre |         | Police College, Ikeja, Lagos State                       | Ikeja   | Lagos |
| 4385 | LA/0589 | LA/0589/S/1  | Cottage Hospital/Comprehensive Health Centre |         | Police College, Ikeja, Lagos State                       | Ikeja   | Lagos |
| 4386 | LA/0589 | LA/0589/S/11 | Cottage Hospital/Comprehensive Health Centre |         | Police College, Ikeja, Lagos State                       | Ikeja   | Lagos |
| 4387 | LA/0589 | LA/0589/S/8  | Cottage Hospital/Comprehensive Health Centre |         | Police College, Ikeja, Lagos State                       | Ikeja   | Lagos |
| 4388 | LA/0589 | LA/0589/S/5  | Cottage Hospital/Comprehensive Health Centre |         | Police College, Ikeja, Lagos State                       | Ikeja   | Lagos |
| 4389 | LA/0591 | LA/0591/S/15 | Nigerian Navy Reference Hospital             |         | Navy Town, Ojo, Lagos                                    | Ojo     | Lagos |
| 4390 | LA/0591 | LA/0591/S/7  | Nigerian Navy Reference Hospital             |         | Navy Town, Ojo, Lagos                                    | Ojo     | Lagos |
| 4391 | LA/0591 | LA/0591/S/3  | Nigerian Navy Reference Hospital             |         | Navy Town, Ojo, Lagos                                    | Ojo     | Lagos |
| 4392 | LA/0591 | LA/0591/S/5  | Nigerian Navy Reference Hospital             |         | Navy Town, Ojo, Lagos                                    | Ojo     | Lagos |
| 4393 | LA/0591 | LA/0591/S/8  | Nigerian Navy Reference Hospital             |         | Navy Town, Ojo, Lagos                                    | Ojo     | Lagos |
| 4394 | LA/0591 | LA/0591/S/12 | Nigerian Navy Reference Hospital             |         | Navy Town, Ojo, Lagos                                    | Ojo     | Lagos |
| 4395 | LA/0591 | LA/0591/S/11 | Nigerian Navy Reference Hospital             |         | Navy Town, Ojo, Lagos                                    | Ojo     | Lagos |
| 4396 | LA/0591 | LA/0591/S/1  | Nigerian Navy Reference Hospital             |         | Navy Town, Ojo, Lagos                                    | Ojo     | Lagos |
| 4397 | LA/0591 | LA/0591/S/4  | Nigerian Navy Reference Hospital             |         | Navy Town, Ojo, Lagos                                    | Ojo     | Lagos |
| 4398 | LA/0591 | LA/0591/S/6  | Nigerian Navy Reference Hospital             |         | Navy Town, Ojo, Lagos                                    | Ojo     | Lagos |
| 4399 | LA/0591 | LA/0591/S/2  | Nigerian Navy Reference Hospital             |         | Navy Town, Ojo, Lagos                                    | Ojo     | Lagos |
| 4400 | LA/0593 | LA/0593/S/14 | Obisessan Navy Medical Centre                |         | Mobil Road, Apapa, Lagos                                 | Apapa   | Lagos |
| 4401 | LA/0593 | LA/0593/S/3  | Obisessan Navy Medical Centre                |         | Mobil Road, Apapa, Lagos                                 | Apapa   | Lagos |
| 4402 | LA/0593 | LA/0593/S/2  | Obisessan Navy Medical Centre                |         | Mobil Road, Apapa, Lagos                                 | Apapa   | Lagos |
| 4403 | LA/0593 | LA/0593/S/1  | Obisessan Navy Medical Centre                |         | Mobil Road, Apapa, Lagos                                 | Apapa   | Lagos |
| 4404 | LA/0593 | LA/0593/S/13 | Obisessan Navy Medical Centre                |         | Mobil Road, Apapa, Lagos                                 | Apapa   | Lagos |
| 4405 | LA/0593 | LA/0593/S/7  | Obisessan Navy Medical Centre                |         | Mobil Road, Apapa, Lagos                                 | Apapa   | Lagos |
| 4406 | LA/0593 | LA/0593/S/5  | Obisessan Navy Medical Centre                |         | Mobil Road, Apapa, Lagos                                 | Apapa   | Lagos |
| 4407 | LA/0593 | LA/0593/S/4  | Obisessan Navy Medical Centre                |         | Mobil Road, Apapa, Lagos                                 | Apapa   | Lagos |
| 4408 | LA/0599 | LA/0599/S/9  | Ladi-lak Medical Centre                      | Primary | No 53 IGY Ologbin street, Ladi-lak B/Stop, Bariga, Lagos | Somolu  | Lagos |
| 4409 | LA/0599 | LA/0599/S/7  | Ladi-lak Medical Centre                      | Primary | No 53 IGY Ologbin street, Ladi-lak B/Stop, Bariga, Lagos | Somolu  | Lagos |
| 4410 | LA/0599 | LA/0599/S/14 | Ladi-lak Medical Centre                      | Primary | No 53 IGY Ologbin street, Ladi-lak B/Stop, Bariga, Lagos | Somolu  | Lagos |

|      |         |              |                                    |                  |                                                                                     |                |       |
|------|---------|--------------|------------------------------------|------------------|-------------------------------------------------------------------------------------|----------------|-------|
| 4411 | LA/0599 | LA/0599/S/6  | Ladi-lak Medical Centre            | Primary          | No 53 IGY Ologbin street, Ladi-lak B/Stop, Bariga, Lagos                            | Somolu         | Lagos |
| 4412 | LA/0599 | LA/0599/S/1  | Ladi-lak Medical Centre            | Primary          | No 53 IGY Ologbin street, Ladi-lak B/Stop, Bariga, Lagos                            | Somolu         | Lagos |
| 4413 | LA/0599 | LA/0599/S/5  | Ladi-lak Medical Centre            | Primary          | No 53 IGY Ologbin street, Ladi-lak B/Stop, Bariga, Lagos                            | Somolu         | Lagos |
| 4414 | LA/0601 | LA/0601/S/5  | Samaria Hospital                   |                  | No 17 Dabo Bashorun street off Ali Dada Street, Okota, Lagos                        | Oshodi/Isolo   | Lagos |
| 4415 | LA/0601 | LA/0601/S/7  | Samaria Hospital                   |                  | No 17 Dabo Bashorun street off Ali Dada Street, Okota, Lagos                        | Oshodi/Isolo   | Lagos |
| 4416 | LA/0601 | LA/0601/S/4  | Samaria Hospital                   |                  | No 17 Dabo Bashorun street off Ali Dada Street, Okota, Lagos                        | Oshodi/Isolo   | Lagos |
| 4417 | LA/0601 | LA/0601/S/10 | Samaria Hospital                   |                  | No 17 Dabo Bashorun street off Ali Dada Street, Okota, Lagos                        | Oshodi/Isolo   | Lagos |
| 4418 | LA/0602 | LA/0602/S/5  | Watershed Hospital                 | Primary          | No 3 Dele Orisabiyi street off Ago palace way, Okota, Lagos                         | Oshodi/Isolo   | Lagos |
| 4419 | LA/0602 | LA/0602/S/3  | Watershed Hospital                 | Primary          | No 3 Dele Orisabiyi street off Ago palace way, Okota, Lagos                         | Oshodi/Isolo   | Lagos |
| 4420 | LA/0604 | LA/0604/S/3  | St Annes Infirmary (Queens Clinic) | Primary          | 5A Dauda Lane, Off Moshood Abiola Way, Ebute Metta                                  | Lagos Mainland | Lagos |
| 4421 | LA/0606 | LA/0606/S/1  | Vones Medical Centre               | Primary          | 9 Barikisu St Onike Yaba                                                            | Lagos Mainland | Lagos |
| 4422 | LA/0606 | LA/0606/S/3  | Vones Medical Centre               | Primary          | 9 Barikisu St Onike Yaba                                                            | Lagos Mainland | Lagos |
| 4423 | LA/0608 | LA/0608/S/5  | Springtime Medical Centre          | Primary Provider | 22, Olusesi Str., Opp. Chemron 2nd Gate by the Conservation Centre, Lekki Peninsula | Eti-Osa        | Lagos |
| 4424 | LA/0608 | LA/0608/S/1  | Springtime Medical Centre          | Primary Provider | 22, Olusesi Str., Opp. Chemron 2nd Gate by the Conservation Centre, Lekki Peninsula | Eti-Osa        | Lagos |
| 4425 | LA/0608 | LA/0608/S/3  | Springtime Medical Centre          | Primary Provider | 22, Olusesi Str., Opp. Chemron 2nd Gate by the Conservation Centre, Lekki Peninsula | Eti-Osa        | Lagos |
| 4426 | LA/0621 | LA/0621/S/1  | Divine Medical Centre              |                  | 16, Akanbi Danmole Street, off Ribadu Rd., SW., Ikoyi, Lagos                        | Eti-Osa        | Lagos |
| 4427 | LA/0621 | LA/0621/S/3  | Divine Medical Centre              |                  | 16, Akanbi Danmole Street, off Ribadu Rd., SW., Ikoyi, Lagos                        | Eti-Osa        | Lagos |
| 4428 | LA/0622 | LA/0622/S/5  | Barnes Hospital                    |                  | Plot 34B Oniru Road, Dideolu Estate, Victoria Island                                | Eti-Osa        | Lagos |
| 4429 | LA/0622 | LA/0622/S/7  | Barnes Hospital                    |                  | Plot 34B Oniru Road, Dideolu Estate, Victoria Island                                | Eti-Osa        | Lagos |
| 4430 | LA/0622 | LA/0622/S/2  | Barnes Hospital                    |                  | Plot 34B Oniru Road, Dideolu Estate, Victoria Island                                | Eti-Osa        | Lagos |
| 4431 | LA/0629 | LA/0629/S/14 | Apex-Care Hospital                 | Primary          | 42 Kujore St Ojota                                                                  | Kosofe         | Lagos |
| 4432 | LA/0629 | LA/0629/S/3  | Apex-Care Hospital                 | Primary          | 42 Kujore St Ojota                                                                  | Kosofe         | Lagos |
| 4433 | LA/0629 | LA/0629/S/10 | Apex-Care Hospital                 | Primary          | 42 Kujore St Ojota                                                                  | Kosofe         | Lagos |
| 4434 | LA/0629 | LA/0629/S/1  | Apex-Care Hospital                 | Primary          | 42 Kujore St Ojota                                                                  | Kosofe         | Lagos |
| 4435 | LA/0629 | LA/0629/S/7  | Apex-Care Hospital                 | Primary          | 42 Kujore St Ojota                                                                  | Kosofe         | Lagos |
| 4436 | LA/0630 | LA/0630/S/5  | Ameso Specialist Hospital          | Primary          | 7 Jumat Olukoya Street Off Ogudu Rd Ojota                                           | Kosofe         | Lagos |
| 4437 | LA/0630 | LA/0630/S/3  | Ameso Specialist Hospital          | Primary          | 7 Jumat Olukoya Street Off Ogudu Rd Ojota                                           | Kosofe         | Lagos |
| 4438 | LA/0630 | LA/0630/S/2  | Ameso Specialist Hospital          | Primary          | 7 Jumat Olukoya Street Off Ogudu Rd Ojota                                           | Kosofe         | Lagos |
| 4439 | LA/0632 | LA/0632/S/5  | Tmac Specialist Hospital           |                  | 14, Berkeley Street, off King George Street, Onikan, Lagos Island                   | Lagos Island   | Lagos |
| 4440 | LA/0632 | LA/0632/S/3  | Tmac Specialist Hospital           |                  | 14, Berkeley Street, off King George Street, Onikan, Lagos Island                   | Lagos Island   | Lagos |
| 4441 | LA/0636 | LA/0636/S/3  | Geo-marie Hospital                 |                  | 35, AdePegbu Street, Abule-Egba, Lagos                                              | Agege          | Lagos |
| 4442 | LA/0639 | LA/0639/S/1  | Donas Hospital and Maternity       | Primary          | 67 Owulade Avenue Irawo Bus/Stop Owode                                              | Kosofe         | Lagos |
| 4443 | LA/0639 | LA/0639/S/3  | Donas Hospital and Maternity       | Primary          | 67 Owulade Avenue Irawo Bus/Stop Owode                                              | Kosofe         | Lagos |
| 4444 | LA/0639 | LA/0639/S/2  | Donas Hospital and Maternity       | Primary          | 67 Owulade Avenue Irawo Bus/Stop Owode                                              | Kosofe         | Lagos |
| 4445 | LA/0639 | LA/0639/S/15 | Donas Hospital and Maternity       | Primary          | 67 Owulade Avenue Irawo Bus/Stop Owode                                              | Kosofe         | Lagos |

|      |         |              |                                  |                     |                                                         |              |       |
|------|---------|--------------|----------------------------------|---------------------|---------------------------------------------------------|--------------|-------|
| 4446 | LA/0643 | LA/0643/S/7  | Ayodele Medical Centre           |                     | 23/25, Jonathan Coker Rd, Off Fagba Junction, Iju Agege | Agege        | Lagos |
| 4447 | LA/0643 | LA/0643/S/1  | Ayodele Medical Centre           |                     | 23/25, Jonathan Coker Rd, Off Fagba Junction, Iju Agege | Agege        | Lagos |
| 4448 | LA/0643 | LA/0643/S/4  | Ayodele Medical Centre           |                     | 23/25, Jonathan Coker Rd, Off Fagba Junction, Iju Agege | Agege        | Lagos |
| 4449 | LA/0643 | LA/0643/S/6  | Ayodele Medical Centre           |                     | 23/25, Jonathan Coker Rd, Off Fagba Junction, Iju Agege | Agege        | Lagos |
| 4450 | LA/0643 | LA/0643/S/10 | Ayodele Medical Centre           |                     | 23/25, Jonathan Coker Rd, Off Fagba Junction, Iju Agege | Agege        | Lagos |
| 4451 | LA/0643 | LA/0643/S/15 | Ayodele Medical Centre           |                     | 23/25, Jonathan Coker Rd, Off Fagba Junction, Iju Agege | Agege        | Lagos |
| 4452 | LA/0643 | LA/0643/S/3  | Ayodele Medical Centre           |                     | 23/25, Jonathan Coker Rd, Off Fagba Junction, Iju Agege | Agege        | Lagos |
| 4453 | LA/0643 | LA/0643/S/5  | Ayodele Medical Centre           |                     | 23/25, Jonathan Coker Rd, Off Fagba Junction, Iju Agege | Agege        | Lagos |
| 4454 | LA/0643 | LA/0643/S/2  | Ayodele Medical Centre           |                     | 23/25, Jonathan Coker Rd, Off Fagba Junction, Iju Agege | Agege        | Lagos |
| 4455 | LA/0643 | LA/0643/S/12 | Ayodele Medical Centre           |                     | 23/25, Jonathan Coker Rd, Off Fagba Junction, Iju Agege | Agege        | Lagos |
| 4456 | LA/0643 | LA/0643/S/8  | Ayodele Medical Centre           |                     | 23/25, Jonathan Coker Rd, Off Fagba Junction, Iju Agege | Agege        | Lagos |
| 4457 | LA/0644 | LA/0644/S/4  | First Line Hospital              | Primary Health Care | 2nd Avenue House 14 By 207 Road Junction, Festac Town   | Amuwo-Odofin | Lagos |
| 4458 | LA/0644 | LA/0644/S/3  | First Line Hospital              | Primary Health Care | 2nd Avenue House 14 By 207 Road Junction, Festac Town   | Amuwo-Odofin | Lagos |
| 4459 | LA/0644 | LA/0644/S/6  | First Line Hospital              | Primary Health Care | 2nd Avenue House 14 By 207 Road Junction, Festac Town   | Amuwo-Odofin | Lagos |
| 4460 | LA/0644 | LA/0644/S/7  | First Line Hospital              | Primary Health Care | 2nd Avenue House 14 By 207 Road Junction, Festac Town   | Amuwo-Odofin | Lagos |
| 4461 | LA/0644 | LA/0644/S/12 | First Line Hospital              | Primary Health Care | 2nd Avenue House 14 By 207 Road Junction, Festac Town   | Amuwo-Odofin | Lagos |
| 4462 | LA/0644 | LA/0644/S/2  | First Line Hospital              | Primary Health Care | 2nd Avenue House 14 By 207 Road Junction, Festac Town   | Amuwo-Odofin | Lagos |
| 4463 | LA/0644 | LA/0644/S/1  | First Line Hospital              | Primary Health Care | 2nd Avenue House 14 By 207 Road Junction, Festac Town   | Amuwo-Odofin | Lagos |
| 4464 | LA/0646 | LA/0646/S/4  | Ancilla Catholic Hospital        |                     | 3, Muyiwa Olojo Street, Iju, Lagos                      | Agege        | Lagos |
| 4465 | LA/0646 | LA/0646/S/5  | Ancilla Catholic Hospital        |                     | 3, Muyiwa Olojo Street, Iju, Lagos                      | Agege        | Lagos |
| 4466 | LA/0646 | LA/0646/S/13 | Ancilla Catholic Hospital        |                     | 3, Muyiwa Olojo Street, Iju, Lagos                      | Agege        | Lagos |
| 4467 | LA/0646 | LA/0646/S/3  | Ancilla Catholic Hospital        |                     | 3, Muyiwa Olojo Street, Iju, Lagos                      | Agege        | Lagos |
| 4468 | LA/0646 | LA/0646/S/2  | Ancilla Catholic Hospital        |                     | 3, Muyiwa Olojo Street, Iju, Lagos                      | Agege        | Lagos |
| 4469 | LA/0646 | LA/0646/S/1  | Ancilla Catholic Hospital        |                     | 3, Muyiwa Olojo Street, Iju, Lagos                      | Agege        | Lagos |
| 4470 | LA/0647 | LA/0647/S/3  | Jobi Clinic & Maternity Hospital | Primary             | 3/5 Adeyeri Owuyo St Ikorodu                            | Ikorodu      | Lagos |
| 4471 | LA/0647 | LA/0647/S/8  | Jobi Clinic & Maternity Hospital | Primary             | 3/5 Adeyeri Owuyo St Ikorodu                            | Ikorodu      | Lagos |
| 4472 | LA/0647 | LA/0647/S/7  | Jobi Clinic & Maternity Hospital | Primary             | 3/5 Adeyeri Owuyo St Ikorodu                            | Ikorodu      | Lagos |
| 4473 | LA/0647 | LA/0647/S/1  | Jobi Clinic & Maternity Hospital | Primary             | 3/5 Adeyeri Owuyo St Ikorodu                            | Ikorodu      | Lagos |
| 4474 | LA/0648 | LA/0648/S/4  | Omni Medical Centre              |                     | 18, Boyle's Street, Onikan, Lagos Island, Lagos         | Lagos Island | Lagos |
| 4475 | LA/0648 | LA/0648/S/3  | Omni Medical Centre              |                     | 18, Boyle's Street, Onikan, Lagos Island, Lagos         | Lagos Island | Lagos |
| 4476 | LA/0648 | LA/0648/S/1  | Omni Medical Centre              |                     | 18, Boyle's Street, Onikan, Lagos Island, Lagos         | Lagos Island | Lagos |
| 4477 | LA/0648 | LA/0648/S/5  | Omni Medical Centre              |                     | 18, Boyle's Street, Onikan, Lagos Island, Lagos         | Lagos Island | Lagos |
| 4478 | LA/0648 | LA/0648/S/2  | Omni Medical Centre              |                     | 18, Boyle's Street, Onikan, Lagos Island, Lagos         | Lagos Island | Lagos |

|      |         |              |                                      |                  |                                                          |                  |       |
|------|---------|--------------|--------------------------------------|------------------|----------------------------------------------------------|------------------|-------|
| 4479 | LA/0648 | LA/0648/S/6  | Omni Medical Centre                  |                  | 18, Boyle's Street, Onikan, Lagos Island, Lagos          | Lagos Island     | Lagos |
| 4480 | LA/0649 | LA/0649/S/1  | Motolani Medical Centre              |                  | 13, Alfa-Nla Street, Agege, Lagos                        | Agege            | Lagos |
| 4481 | LA/0649 | LA/0649/S/5  | Motolani Medical Centre              |                  | 13, Alfa-Nla Street, Agege, Lagos                        | Agege            | Lagos |
| 4482 | LA/0649 | LA/0649/S/3  | Motolani Medical Centre              |                  | 13, Alfa-Nla Street, Agege, Lagos                        | Agege            | Lagos |
| 4483 | LA/0650 | LA/0650/S/3  | Esiri Specialist Hospital            | Primary          | 5 Alashe Close Ojogbe Ikorodu                            | Ikorodu          | Lagos |
| 4484 | LA/0651 | LA/0651/S/8  | T&S Hospital, Apapa                  | Primary Provider | 26 Bombay Crescent Apapa                                 | Apapa            | Lagos |
| 4485 | LA/0651 | LA/0651/S/15 | T&S Hospital, Apapa                  | Primary Provider | 26 Bombay Crescent Apapa                                 | Apapa            | Lagos |
| 4486 | LA/0655 | LA/0655/S/11 | Subol Hospital                       |                  | 16/17, Oba Amusa Avenue, Off Ikotun Rd, Idimu-Lagos      | Alimosho         | Lagos |
| 4487 | LA/0655 | LA/0655/S/5  | Subol Hospital                       |                  | 16/17, Oba Amusa Avenue, Off Ikotun Rd, Idimu-Lagos      | Alimosho         | Lagos |
| 4488 | LA/0655 | LA/0655/S/1  | Subol Hospital                       |                  | 16/17, Oba Amusa Avenue, Off Ikotun Rd, Idimu-Lagos      | Alimosho         | Lagos |
| 4489 | LA/0655 | LA/0655/S/3  | Subol Hospital                       |                  | 16/17, Oba Amusa Avenue, Off Ikotun Rd, Idimu-Lagos      | Alimosho         | Lagos |
| 4490 | LA/0655 | LA/0655/S/10 | Subol Hospital                       |                  | 16/17, Oba Amusa Avenue, Off Ikotun Rd, Idimu-Lagos      | Alimosho         | Lagos |
| 4491 | LA/0655 | LA/0655/S/2  | Subol Hospital                       |                  | 16/17, Oba Amusa Avenue, Off Ikotun Rd, Idimu-Lagos      | Alimosho         | Lagos |
| 4492 | LA/0655 | LA/0655/S/6  | Subol Hospital                       |                  | 16/17, Oba Amusa Avenue, Off Ikotun Rd, Idimu-Lagos      | Alimosho         | Lagos |
| 4493 | LA/0655 | LA/0655/S/7  | Subol Hospital                       |                  | 16/17, Oba Amusa Avenue, Off Ikotun Rd, Idimu-Lagos      | Alimosho         | Lagos |
| 4494 | LA/0655 | LA/0655/S/8  | Subol Hospital                       |                  | 16/17, Oba Amusa Avenue, Off Ikotun Rd, Idimu-Lagos      | Alimosho         | Lagos |
| 4495 | LA/0655 | LA/0655/S/14 | Subol Hospital                       |                  | 16/17, Oba Amusa Avenue, Off Ikotun Rd, Idimu-Lagos      | Alimosho         | Lagos |
| 4496 | LA/0655 | LA/0655/S/12 | Subol Hospital                       |                  | 16/17, Oba Amusa Avenue, Off Ikotun Rd, Idimu-Lagos      | Alimosho         | Lagos |
| 4497 | LA/0655 | LA/0655/S/4  | Subol Hospital                       |                  | 16/17, Oba Amusa Avenue, Off Ikotun Rd, Idimu-Lagos      | Alimosho         | Lagos |
| 4498 | LA/0656 | LA/0656/S/1  | Shammah Hospital                     | Primary Provider | 5, Epe Street Off Iludun Street Amukoko Lagos            | Ajeromi/Ifelodun | Lagos |
| 4499 | LA/0659 | LA/0659/S/5  | Bethesda Family Clinic and Maternity | Primary Provider | 207 Road, A Close House 6. Festac Town Lagos             | Amuwo-Odofin     | Lagos |
| 4500 | LA/0661 | LA/0661/S/1  | Hanoba Medical Centre                |                  | 23, Boyle's Street, Onikan, Lagos                        | Eti-Osa          | Lagos |
| 4501 | LA/0661 | LA/0661/S/5  | Hanoba Medical Centre                |                  | 23, Boyle's Street, Onikan, Lagos                        | Eti-Osa          | Lagos |
| 4502 | LA/0662 | LA/0662/S/3  | Ajayi Medical Center                 | Primary Provider | 50 Ekulu Street Ikorodu                                  | Ikorodu          | Lagos |
| 4503 | LA/0662 | LA/0662/S/8  | Ajayi Medical Center                 | Primary Provider | 50 Ekulu Street Ikorodu                                  | Ikorodu          | Lagos |
| 4504 | LA/0662 | LA/0662/S/11 | Ajayi Medical Center                 | Primary Provider | 50 Ekulu Street Ikorodu                                  | Ikorodu          | Lagos |
| 4505 | LA/0662 | LA/0662/S/7  | Ajayi Medical Center                 | Primary Provider | 50 Ekulu Street Ikorodu                                  | Ikorodu          | Lagos |
| 4506 | LA/0662 | LA/0662/S/1  | Ajayi Medical Center                 | Primary Provider | 50 Ekulu Street Ikorodu                                  | Ikorodu          | Lagos |
| 4507 | LA/0662 | LA/0662/S/5  | Ajayi Medical Center                 | Primary Provider | 50 Ekulu Street Ikorodu                                  | Ikorodu          | Lagos |
| 4508 | LA/0662 | LA/0662/S/12 | Ajayi Medical Center                 | Primary Provider | 50 Ekulu Street Ikorodu                                  | Ikorodu          | Lagos |
| 4509 | LA/0667 | LA/0667/S/15 | Natafod Consultants Hospital         | Primary Provider | 104 Cemetery Road, Mosafejo, NEPA B/Stop, Amukoko, Lagos | Ajeromi/Ifelodun | Lagos |
| 4510 | LA/0667 | LA/0667/S/3  | Natafod Consultants Hospital         | Primary Provider | 104 Cemetery Road, Mosafejo, NEPA B/Stop, Amukoko, Lagos | Ajeromi/Ifelodun | Lagos |
| 4511 | LA/0668 | LA/0668/S/3  | High Rocks Hospital                  |                  | 38 Afariogun street, Oshodi                              | Oshodi/Isolo     | Lagos |
| 4512 | LA/0668 | LA/0668/S/5  | High Rocks Hospital                  |                  | 38 Afariogun street, Oshodi                              | Oshodi/Isolo     | Lagos |
| 4513 | LA/0670 | LA/0670/S/1  | Adesola Clinic                       |                  | 2 Onabola street Pedro Bariga                            | Somolu           | Lagos |
| 4514 | LA/0670 | LA/0670/S/5  | Adesola Clinic                       |                  | 2 Onabola street Pedro Bariga                            | Somolu           | Lagos |
| 4515 | LA/0670 | LA/0670/S/7  | Adesola Clinic                       |                  | 2 Onabola street Pedro Bariga                            | Somolu           | Lagos |



|      |         |              |                                                               |                  |                                                                              |              |       |
|------|---------|--------------|---------------------------------------------------------------|------------------|------------------------------------------------------------------------------|--------------|-------|
| 4516 | LA/0671 | LA/0671/S/8  | Ropheka Hospital Ltd                                          | Primary          | 6 Dosu Ogundele Street<br>Miccom Bus/Stop Akowonjo<br>Lagos                  | Alimosho     | Lagos |
| 4517 | LA/0672 | LA/0672/S/14 | Capes Hospital Ltd                                            |                  | 16a Alubarika street, Bariga                                                 | Somolu       | Lagos |
| 4518 | LA/0673 | LA/0673/S/3  | Promise Medical<br>Center Ltd                                 | Primary          | 112 Dopemu Rd Ayinla<br>B/Stop Dopemu Lagos                                  | Alimosho     | Lagos |
| 4519 | LA/0673 | LA/0673/S/8  | Promise Medical<br>Center Ltd                                 | Primary          | 112 Dopemu Rd Ayinla<br>B/Stop Dopemu Lagos                                  | Alimosho     | Lagos |
| 4520 | LA/0673 | LA/0673/S/1  | Promise Medical<br>Center Ltd                                 | Primary          | 112 Dopemu Rd Ayinla<br>B/Stop Dopemu Lagos                                  | Alimosho     | Lagos |
| 4521 | LA/0674 | LA/0674/S/4  | Primex Hospital                                               | Primary          | 58 Igando Rd Unity Bus/Stop<br>Ikotun-Egbe Lagos                             | Alimosho     | Lagos |
| 4522 | LA/0674 | LA/0674/S/5  | Primex Hospital                                               | Primary          | 58 Igando Rd Unity Bus/Stop<br>Ikotun-Egbe Lagos                             | Alimosho     | Lagos |
| 4523 | LA/0677 | LA/0677/S/1  | Okiki Clinic &<br>Maternity                                   | Primary          | 18 Ola Sheu Str Iyana Ipaja<br>by Alimosho Bus/Stop                          | Alimosho     | Lagos |
| 4524 | LA/0679 | LA/0679/S/5  | Mobonike-T Medical<br>Centre                                  | Primary          | 26, Surulere 1 Bus Stop<br>Dopemu Lagos                                      | Agege        | Lagos |
| 4525 | LA/0680 | LA/0680/S/1  | Majoroh Medical<br>Center                                     | Primary Provider | 6 Olofin Street Apapa Lagos                                                  | Apapa        | Lagos |
| 4526 | LA/0680 | LA/0680/S/8  | Majoroh Medical<br>Center                                     | Primary Provider | 6 Olofin Street Apapa Lagos                                                  | Apapa        | Lagos |
| 4527 | LA/0683 | LA/0683/S/5  | Light Hospital                                                | Primary          | 15 Olumide Onanubi Str Off<br>Folarin Str Alimosho/Off<br>Jimoh B/S Akowonjo | Alimosho     | Lagos |
| 4528 | LA/0683 | LA/0683/S/4  | Light Hospital                                                | Primary          | 15 Olumide Onanubi Str Off<br>Folarin Str Alimosho/Off<br>Jimoh B/S Akowonjo | Alimosho     | Lagos |
| 4529 | LA/0683 | LA/0683/S/7  | Light Hospital                                                | Primary          | 15 Olumide Onanubi Str Off<br>Folarin Str Alimosho/Off<br>Jimoh B/S Akowonjo | Alimosho     | Lagos |
| 4530 | LA/0683 | LA/0683/S/2  | Light Hospital                                                | Primary          | 15 Olumide Onanubi Str Off<br>Folarin Str Alimosho/Off<br>Jimoh B/S Akowonjo | Alimosho     | Lagos |
| 4531 | LA/0684 | LA/0684/S/3  | Somito Specialist<br>Hospital                                 | Primary Provider | Plot 937, 13th , Road First<br>Avenue Festac Town Lagos                      | Amuwo-Odofin | Lagos |
| 4532 | LA/0687 | LA/0687/S/3  | Hamkad Hospital                                               | Primary          | 39 Olawale Cole Street U-<br>turn B/Stop Abule Egba                          | Alimosho     | Lagos |
| 4533 | LA/0687 | LA/0687/S/1  | Hamkad Hospital                                               | Primary          | 39 Olawale Cole Street U-<br>turn B/Stop Abule Egba                          | Alimosho     | Lagos |
| 4534 | LA/0690 | LA/0690/S/7  | DaySpring Hospital &<br>Maternity                             | Primary          | 1 Popoola Street Off Isijola<br>Street Ikotun Lagos                          | Alimosho     | Lagos |
| 4535 | LA/0690 | LA/0690/S/3  | DaySpring Hospital &<br>Maternity                             | Primary          | 1 Popoola Street Off Isijola<br>Street Ikotun Lagos                          | Alimosho     | Lagos |
| 4536 | LA/0690 | LA/0690/S/5  | DaySpring Hospital &<br>Maternity                             | Primary          | 1 Popoola Street Off Isijola<br>Street Ikotun Lagos                          | Alimosho     | Lagos |
| 4537 | LA/0690 | LA/0690/S/1  | DaySpring Hospital &<br>Maternity                             | Primary          | 1 Popoola Street Off Isijola<br>Street Ikotun Lagos                          | Alimosho     | Lagos |
| 4538 | LA/0697 | LA/0697/S/1  | Adenike Fadeyibi<br>Memorial Hospital                         | Primary          | 20 Akowonjo Rd, Egbeda,<br>Akowonjo Lagos                                    | Alimosho     | Lagos |
| 4539 | LA/0699 | LA/0699/S/7  | Golden Cross Infirmary<br>Hospital and Maternity<br>Home Ltd. | Primary Provider | 22 Road Festac Town Lagos                                                    | Amuwo-Odofin | Lagos |
| 4540 | LA/0699 | LA/0699/S/5  | Golden Cross Infirmary<br>Hospital and Maternity<br>Home Ltd. | Primary Provider | 22 Road Festac Town Lagos                                                    | Amuwo-Odofin | Lagos |
| 4541 | LA/0705 | LA/0705/S/3  | Elphy Hospital                                                |                  | 6, Task Force Rd, By PPL B/S,<br>Okokomaiko, Lagos                           | Ojo          | Lagos |
| 4542 | LA/0705 | LA/0705/S/5  | Elphy Hospital                                                |                  | 6, Task Force Rd, By PPL B/S,<br>Okokomaiko, Lagos                           | Ojo          | Lagos |
| 4543 | LA/0706 | LA/0706/S/7  | Onyems-B Hospital                                             |                  | 16, Oba-Dauda Str., Ojoo<br>Alaba, Lagos                                     | Ojo          | Lagos |
| 4544 | LA/0706 | LA/0706/S/4  | Onyems-B Hospital                                             |                  | 16, Oba-Dauda Str., Ojoo<br>Alaba, Lagos                                     | Ojo          | Lagos |
| 4545 | LA/0706 | LA/0706/S/1  | Onyems-B Hospital                                             |                  | 16, Oba-Dauda Str., Ojoo<br>Alaba, Lagos                                     | Ojo          | Lagos |
| 4546 | LA/0706 | LA/0706/S/3  | Onyems-B Hospital                                             |                  | 16, Oba-Dauda Str., Ojoo<br>Alaba, Lagos                                     | Ojo          | Lagos |
| 4547 | LA/0714 | LA/0714/S/4  | The Great Phycian<br>Hospital Ltd                             |                  | 3, Niyi Adebule Str, New<br>Nepa B/S Badagry                                 | Badagry      | Lagos |
| 4548 | LA/0715 | LA/0715/S/7  | Ola-Oki Medical Centre                                        |                  | Opp Iberoko Low cost B/S<br>Ibereko, Badagry                                 | Badagry      | Lagos |
| 4549 | LA/0715 | LA/0715/S/4  | Ola-Oki Medical Centre                                        |                  | Opp Iberoko Low cost B/S<br>Ibereko, Badagry                                 | Badagry      | Lagos |

|      |         |              |                                         |                  |                                                        |         |       |
|------|---------|--------------|-----------------------------------------|------------------|--------------------------------------------------------|---------|-------|
| 4550 | LA/0715 | LA/0715/S/1  | Ola-Oki Medical Centre                  |                  | Opp Iberoko Low cost B/S Ibereko, Badagry              | Badagry | Lagos |
| 4551 | LA/0716 | LA/0716/S/11 | General Hospital Apapa                  |                  | 16, Ibikunle Akintoye Str, Off Randle Rd, Apapa        | Apapa   | Lagos |
| 4552 | LA/0716 | LA/0716/S/8  | General Hospital Apapa                  |                  | 16, Ibikunle Akintoye Str, Off Randle Rd, Apapa        | Apapa   | Lagos |
| 4553 | LA/0716 | LA/0716/S/3  | General Hospital Apapa                  |                  | 16, Ibikunle Akintoye Str, Off Randle Rd, Apapa        | Apapa   | Lagos |
| 4554 | LA/0716 | LA/0716/S/5  | General Hospital Apapa                  |                  | 16, Ibikunle Akintoye Str, Off Randle Rd, Apapa        | Apapa   | Lagos |
| 4555 | LA/0716 | LA/0716/S/4  | General Hospital Apapa                  |                  | 16, Ibikunle Akintoye Str, Off Randle Rd, Apapa        | Apapa   | Lagos |
| 4556 | LA/0716 | LA/0716/S/1  | General Hospital Apapa                  |                  | 16, Ibikunle Akintoye Str, Off Randle Rd, Apapa        | Apapa   | Lagos |
| 4557 | LA/0716 | LA/0716/S/6  | General Hospital Apapa                  |                  | 16, Ibikunle Akintoye Str, Off Randle Rd, Apapa        | Apapa   | Lagos |
| 4558 | LA/0716 | LA/0716/S/15 | General Hospital Apapa                  |                  | 16, Ibikunle Akintoye Str, Off Randle Rd, Apapa        | Apapa   | Lagos |
| 4559 | LA/0720 | LA/0720/S/3  | Unity Hospital ,Ikeja.                  |                  | 138 Obafemi Awolowo Way Ikeja                          | Ikeja   | Lagos |
| 4560 | LA/0720 | LA/0720/S/1  | Unity Hospital ,Ikeja.                  |                  | 138 Obafemi Awolowo Way Ikeja                          | Ikeja   | Lagos |
| 4561 | LA/0720 | LA/0720/S/4  | Unity Hospital ,Ikeja.                  |                  | 138 Obafemi Awolowo Way Ikeja                          | Ikeja   | Lagos |
| 4562 | LA/0721 | LA/0721/S/6  | Adefemi Hospital                        | Primary Provider | 49 Seriki Aro, Avenu Off Obafemi Awolowo Way Lagos     | Ikeja   | Lagos |
| 4563 | LA/0721 | LA/0721/S/8  | Adefemi Hospital                        | Primary Provider | 49 Seriki Aro, Avenu Off Obafemi Awolowo Way Lagos     | Ikeja   | Lagos |
| 4564 | LA/0721 | LA/0721/S/2  | Adefemi Hospital                        | Primary Provider | 49 Seriki Aro, Avenu Off Obafemi Awolowo Way Lagos     | Ikeja   | Lagos |
| 4565 | LA/0721 | LA/0721/S/5  | Adefemi Hospital                        | Primary Provider | 49 Seriki Aro, Avenu Off Obafemi Awolowo Way Lagos     | Ikeja   | Lagos |
| 4566 | LA/0721 | LA/0721/S/1  | Adefemi Hospital                        | Primary Provider | 49 Seriki Aro, Avenu Off Obafemi Awolowo Way Lagos     | Ikeja   | Lagos |
| 4567 | LA/0721 | LA/0721/S/15 | Adefemi Hospital                        | Primary Provider | 49 Seriki Aro, Avenu Off Obafemi Awolowo Way Lagos     | Ikeja   | Lagos |
| 4568 | LA/0721 | LA/0721/S/3  | Adefemi Hospital                        | Primary Provider | 49 Seriki Aro, Avenu Off Obafemi Awolowo Way Lagos     | Ikeja   | Lagos |
| 4569 | LA/0723 | LA/0723/S/5  | The Duke Medical                        | Primary Provider | 26 Bamishele Street Off Allen Avenue Ikeja             | Ikeja   | Lagos |
| 4570 | LA/0723 | LA/0723/S/15 | The Duke Medical                        | Primary Provider | 26 Bamishele Street Off Allen Avenue Ikeja             | Ikeja   | Lagos |
| 4571 | LA/0724 | LA/0724/S/3  | Isalu Hospital                          | Primary Provider | 10 Wempco Road, Off Lateef Jakande Road, Ogba, Ikeja   | Ikeja   | Lagos |
| 4572 | LA/0724 | LA/0724/S/5  | Isalu Hospital                          | Primary Provider | 10 Wempco Road, Off Lateef Jakande Road, Ogba, Ikeja   | Ikeja   | Lagos |
| 4573 | LA/0726 | LA/0726/S/5  | RCCG Life Centre Hospital & Maternity   |                  | 9 Amore Street Off Toyin Street, Ikeja                 | Ikeja   | Lagos |
| 4574 | LA/0726 | LA/0726/S/3  | RCCG Life Centre Hospital & Maternity   |                  | 9 Amore Street Off Toyin Street, Ikeja                 | Ikeja   | Lagos |
| 4575 | LA/0730 | LA/0730/S/1  | The Valley Surgical and Medical Clinics | Primary Provider | 5 Olatayo Alao Street River valley Estate Ojodu, Lagos | Ikeja   | Lagos |
| 4576 | LA/0731 | LA/0731/S/5  | Solid Rock Hospital                     | Primary Provider | Plote 108 Isheri Road Ojodu                            | Ikeja   | Lagos |
| 4577 | LA/0731 | LA/0731/S/8  | Solid Rock Hospital                     | Primary Provider | Plote 108 Isheri Road Ojodu                            | Ikeja   | Lagos |
| 4578 | LA/0731 | LA/0731/S/3  | Solid Rock Hospital                     | Primary Provider | Plote 108 Isheri Road Ojodu                            | Ikeja   | Lagos |
| 4579 | LA/0731 | LA/0731/S/1  | Solid Rock Hospital                     | Primary Provider | Plote 108 Isheri Road Ojodu                            | Ikeja   | Lagos |
| 4580 | LA/0731 | LA/0731/S/4  | Solid Rock Hospital                     | Primary Provider | Plote 108 Isheri Road Ojodu                            | Ikeja   | Lagos |
| 4581 | LA/0732 | LA/0732/S/5  | Sharon Height Medical Centre            |                  | 13 Amore Street Off Toyin Street Ikeja                 | Ikeja   | Lagos |
| 4582 | LA/0732 | LA/0732/S/3  | Sharon Height Medical Centre            |                  | 13 Amore Street Off Toyin Street Ikeja                 | Ikeja   | Lagos |
| 4583 | LA/0732 | LA/0732/S/1  | Sharon Height Medical Centre            |                  | 13 Amore Street Off Toyin Street Ikeja                 | Ikeja   | Lagos |
| 4584 | LA/0732 | LA/0732/S/6  | Sharon Height Medical Centre            |                  | 13 Amore Street Off Toyin Street Ikeja                 | Ikeja   | Lagos |
| 4585 | LA/0732 | LA/0732/S/12 | Sharon Height Medical Centre            |                  | 13 Amore Street Off Toyin Street Ikeja                 | Ikeja   | Lagos |
| 4586 | LA/0733 | LA/0733/S/6  | Mother & Child Hospital                 | Primary Provider | 39A, Adeniyi Jones Avenue Ikeja                        | Ikeja   | Lagos |
| 4587 | LA/0733 | LA/0733/S/5  | Mother & Child Hospital                 | Primary Provider | 39A, Adeniyi Jones Avenue Ikeja                        | Ikeja   | Lagos |
| 4588 | LA/0736 | LA/0736/S/1  | German Friendship                       |                  | 20, Amore Street Off Toyin Street                      | Ikeja   | Lagos |

|      |         |              |                                             |                       |                                                                             |              |       |
|------|---------|--------------|---------------------------------------------|-----------------------|-----------------------------------------------------------------------------|--------------|-------|
| 4589 | LA/0736 | LA/0736/S/3  | German Friendship                           |                       | 20, Amore Street Off Toyin Street                                           | Ikeja        | Lagos |
| 4590 | LA/0736 | LA/0736/S/5  | German Friendship                           |                       | 20, Amore Street Off Toyin Street                                           | Ikeja        | Lagos |
| 4591 | LA/0736 | LA/0736/S/4  | German Friendship                           |                       | 20, Amore Street Off Toyin Street                                           | Ikeja        | Lagos |
| 4592 | LA/0737 | LA/0737/S/5  | G & S Medical & Dental Hospital             | Primary Provider      | 15 Muyibi Street, Oveira Ogba, Lagos                                        | Ikeja        | Lagos |
| 4593 | LA/0737 | LA/0737/S/8  | G & S Medical & Dental Hospital             | Primary Provider      | 15 Muyibi Street, Oveira Ogba, Lagos                                        | Ikeja        | Lagos |
| 4594 | LA/0738 | LA/0738/S/3  | Dominion Medical Consultant                 | Primary Provider      | 7 Ade Ojo Street Wemabod Estate, Ikeja, Lagos                               | Ikeja        | Lagos |
| 4595 | LA/0738 | LA/0738/S/1  | Dominion Medical Consultant                 | Primary Provider      | 7 Ade Ojo Street Wemabod Estate, Ikeja, Lagos                               | Ikeja        | Lagos |
| 4596 | LA/0738 | LA/0738/S/14 | Dominion Medical Consultant                 | Primary Provider      | 7 Ade Ojo Street Wemabod Estate, Ikeja, Lagos                               | Ikeja        | Lagos |
| 4597 | LA/0738 | LA/0738/S/5  | Dominion Medical Consultant                 | Primary Provider      | 7 Ade Ojo Street Wemabod Estate, Ikeja, Lagos                               | Ikeja        | Lagos |
| 4598 | LA/0740 | LA/0740/S/3  | Amazing Grace Medical Centre                | Primary Provider      | PF 910, Omole Phase 1 Omotade Crescent Agidibi Rd. Ikeja                    | Ikeja        | Lagos |
| 4599 | LA/0745 | LA/0745/S/5  | Parkande Specialist Hospital                |                       | 13, Rasaq Balogun Street Off Adetola Street Off Adeniran Ogunsanya          | Surulere     | Lagos |
| 4600 | LA/0745 | LA/0745/S/14 | Parkande Specialist Hospital                |                       | 13, Rasaq Balogun Street Off Adetola Street Off Adeniran Ogunsanya          | Surulere     | Lagos |
| 4601 | LA/0745 | LA/0745/S/4  | Parkande Specialist Hospital                |                       | 13, Rasaq Balogun Street Off Adetola Street Off Adeniran Ogunsanya          | Surulere     | Lagos |
| 4602 | LA/0745 | LA/0745/S/6  | Parkande Specialist Hospital                |                       | 13, Rasaq Balogun Street Off Adetola Street Off Adeniran Ogunsanya          | Surulere     | Lagos |
| 4603 | LA/0745 | LA/0745/S/1  | Parkande Specialist Hospital                |                       | 13, Rasaq Balogun Street Off Adetola Street Off Adeniran Ogunsanya          | Surulere     | Lagos |
| 4604 | LA/0745 | LA/0745/S/3  | Parkande Specialist Hospital                |                       | 13, Rasaq Balogun Street Off Adetola Street Off Adeniran Ogunsanya          | Surulere     | Lagos |
| 4605 | LA/0748 | LA/0748/S/3  | Jalupon EState Hospital                     | Primary Provider      | 63 Bode Thomas Street Lagos                                                 | Surulere     | Lagos |
| 4606 | LA/0748 | LA/0748/S/1  | Jalupon EState Hospital                     | Primary Provider      | 63 Bode Thomas Street Lagos                                                 | Surulere     | Lagos |
| 4607 | LA/0752 | LA/0752/S/8  | Primus Hospital                             |                       | 272 Ijesha Rd. Ijesha-tedo                                                  | Surulere     | Lagos |
| 4608 | LA/0768 | LA/0768/S/4  | Rosewell Pharmacy Ltd                       | Pharmacy              | Signboard Bus stop Adoo Rd Ajah Lagos                                       | Eti-Osa      | Lagos |
| 4609 | LA/0779 | LA/0779/S/13 | Krystal Optical Ltd                         | Eye services          | 156 Awolowo Rd SW Ikoyi Lagos                                               | Eti-Osa      | Lagos |
| 4610 | LA/0780 | LA/0780/S/13 | Ultimate Eye Clinic                         | Eye Services          | 16 Biaduo Str SW Ikoyi Lagos                                                | Eti-Osa      | Lagos |
| 4611 | LA/0782 | LA/0782/S/8  | Smiley Dental Clinic                        | Dental Services       | Suite F11, 1st Floor VGC Shopping Mall VGC Lekki Lagos                      | Eti-Osa      | Lagos |
| 4612 | LA/0784 | LA/0784/S/8  | Degason Dental Health Ltd                   | Dental Services       | 2A Lalupon Close Off Keffi Str SW Ikoyi Lagos                               | Eti-Osa      | Lagos |
| 4613 | LA/0785 | LA/0785/S/8  | Aduagem Dental Clinic                       | Dental Services       | 3B Ligali Ayorinde Str VI Lagos                                             | Eti-Osa      | Lagos |
| 4614 | LA/0786 | LA/0786/S/8  | Divine dental Home                          | Dental Services       | 8B Fabac Close Off Ligali Ayorinde Str VI Lagos                             | Eti-Osa      | Lagos |
| 4615 | LA/0787 | LA/0787/S/8  | Federal Dental Clinic                       | Dental Services       | No 1 Broad str Lagos                                                        | Kosofe       | Lagos |
| 4616 | LA/0791 | LA/0791/S/5  | The Health Arena                            | O&G                   | 13 Strachan Str Off Igbosere Rd Opp Lapal House Lagos                       | Lagos Island | Lagos |
| 4617 | LA/0791 | LA/0791/S/3  | The Health Arena                            | O&G                   | 13 Strachan Str Off Igbosere Rd Opp Lapal House Lagos                       | Lagos Island | Lagos |
| 4618 | LA/0804 | LA/0804/S/5  | Clinia Immunoassay Laboratories Ltd         | Laboratory            | 41, Old Road, Amuwo-Odofin Lagos                                            | Amuwo-Odofin | Lagos |
| 4619 | LA/0805 | LA/0805/S/4  | Solutions Pharmaceuticals Nig. Ltd.         | Pharmacy              | 1B Jejumola St. Off Alafia Bust Stop By Oando Filling Station Amukoko Lagos | Amuwo-Odofin | Lagos |
| 4620 | LA/0808 | LA/0808/S/5  | Dunamis Diagnostic Service                  | Laboratory            | 367, Ojo Rd. Satellite Town Lagos                                           | Ojo          | Lagos |
| 4621 | LA/0813 | LA/0813/S/5  | H-Power Diagnostic Service(Aniyun Hospital) | Laboratory            | No 3 Femi Aderibigbe Close Off Diya St Beside Total Filling Station Gbagada | Kosofe       | Lagos |
| 4622 | LA/0817 | LA/0817/S/13 | Marole Eye clinic (Optometry)               | Optometry             | 44 Diya Street, Gbagada, Lagos                                              | Kosofe       | Lagos |
| 4623 | LA/0818 | LA/0818/S/8  | St Emmanuel Hospital                        | Physiotherapy, Dental | No 2 Bola Ademuyinwa St Off Osolo Way Isolo Lagos                           | Oshodi/Isolo | Lagos |

|      |         |              |                                         |                                              |                                                                           |              |       |
|------|---------|--------------|-----------------------------------------|----------------------------------------------|---------------------------------------------------------------------------|--------------|-------|
| 4624 | LA/0818 | LA/0818/S/11 | St Emmanuel Hospital                    | Physiotherapy,<br>Dental                     | No 2 Bola Ademuyinwa St<br>Off Osolo Way Isolo Lagos                      | Oshodi/Isolo | Lagos |
| 4625 | LA/0819 | LA/0819/S/5  | Heda Hospital                           | Laboratory                                   | No 2A, Princess Aina jegede<br>close, Ajao Estate Lagos                   | Oshodi/Isolo | Lagos |
| 4626 | LA/0820 | LA/0820/S    | Mayob Medical<br>Laboratory             | Laboratory                                   | No 2 Ifos Rd Iyana Ejogbo<br>B/Stop Oshodi                                | Oshodi/Isolo | Lagos |
| 4627 | LA/0821 | LA/0821/S/4  | Bayo Superb Pharmacy                    | Pharmacy                                     | No 11 Olusesi Street Ejigbo                                               | Oshodi/Isolo | Lagos |
| 4628 | LA/0822 | LA/0822/S/4  | Aje Investment Ltd                      | Pharmacy                                     | No 2 Alaba St Off Pipeline<br>Rd Opp Oboye Junction<br>Orilowo Ejigbo     | Oshodi/Isolo | Lagos |
| 4629 | LA/0823 | LA/0823/S/4  | Pinco Pharm Nig Ltd                     | Pharmacy                                     | No 24 Oke St Pedro<br>Shomolu                                             | Somolu       | Lagos |
| 4630 | LA/0825 | LA/0825/S/4  | Remvic Pharmacy                         | Pharmacy                                     | No 14 Ire-Akari Estate Isolo<br>Lagos                                     | Oshodi/Isolo | Lagos |
| 4631 | LA/0826 | LA/0826/S/4  | Chymasen Pharmacy &<br>Stores           | Pharmacy                                     | No Taiwo St Ago Palace Way<br>Okota Lagos                                 | Oshodi/Isolo | Lagos |
| 4632 | LA/0830 | LA/0830/S/7  | Union Diagnostic &<br>Clinical Services | Radiology,<br>Laboratory                     | 37 Tejuosho Street Surulere,<br>Lagos                                     | Surulere     | Lagos |
| 4633 | LA/0830 | LA/0830/S/5  | Union Diagnostic &<br>Clinical Services | Radiology,<br>Laboratory                     | 37 Tejuosho Street Surulere,<br>Lagos                                     | Surulere     | Lagos |
| 4634 | LA/0832 | LA/0832/S/4  | Santus Pharm & Stores                   | Pharmacy                                     | 272 Ijesha Rd Ijesha                                                      | Surulere     | Lagos |
| 4635 | LA/0833 | LA/0833/S/4  | Rosec Pharmacy Ltd                      |                                              | Plot 50 Babs Animashaun<br>Extn Off Bode Thomas                           | Surulere     | Lagos |
| 4636 | LA/0835 | LA/0835/S/7  | Prisms Diagnostic Clinic                | Radiology                                    | 8 Oyediran Str, Off Bode<br>Thomas                                        | Surulere     | Lagos |
| 4637 | LA/0839 | LA/0839/S/4  | O Medics Pharmacy                       | Pharmacy                                     | 6 Oduduwa Str, Ikate                                                      | Surulere     | Lagos |
| 4638 | LA/0843 | LA/0843/S/4  | Jubilee Pharmacy                        | Pharmacy                                     | 20 Adeniyi Adeyioye Str,<br>Ikate                                         | Surulere     | Lagos |
| 4639 | LA/0844 | LA/0844/S/8  | Green Fountain<br>Medical Services      | Dentistry                                    | 16 Akinsemoyin Str, Off<br>Bode Thomas Str                                | Surulere     | Lagos |
| 4640 | LA/0845 | LA/0845/S/4  | Frontliners Pharmacy<br>& Stores        | Pharmacy                                     | 2 Smith Str, Off Olutire Odo<br>eran, Itire                               | Surulere     | Lagos |
| 4641 | LA/0846 | LA/0846/S/5  | Clinics Laboratory                      | Labortory                                    | 44 Ishaya Rd                                                              | Surulere     | Lagos |
| 4642 | LA/0848 | LA/0848/S/5  | Bauke Diagnostic<br>Centre              | Laboratory                                   | 272 Ijesha Rd, Ijesha Tedo                                                | Alimosho     | Lagos |
| 4643 | LA/0849 | LA/0849/S/5  | Anumels Medical<br>Laboratory           | Laboratory                                   | 38 Sabiu Ajose Cres, Off<br>Bode Thomas                                   | Surulere     | Lagos |
| 4644 | LA/0851 | LA/0851/S/8  | Spectrum Dental Clinic                  | Dentistry                                    | 26, Babs Animashaun, Off<br>Bode Thomas                                   | Surulere     | Lagos |
| 4645 | LA/0852 | LA/0852/S/8  | Smiley Dental Care                      | Dentistry                                    | 81 Bode Thomas Str                                                        | Surulere     | Lagos |
| 4646 | LA/0853 | LA/0853/S/5  | St Lukes Medical<br>Centre              | Laboratory,<br>Surgery, O&G                  | 14 Alh Olakunle Str, Off<br>Ommileni Str, Ijesha                          | Surulere     | Lagos |
| 4647 | LA/0853 | LA/0853/S/3  | St Lukes Medical<br>Centre              | Laboratory,<br>Surgery, O&G                  | 14 Alh Olakunle Str, Off<br>Ommileni Str, Ijesha                          | Surulere     | Lagos |
| 4648 | LA/0853 | LA/0853/S/1  | St Lukes Medical<br>Centre              | Laboratory,<br>Surgery, O&G                  | 14 Alh Olakunle Str, Off<br>Ommileni Str, Ijesha                          | Surulere     | Lagos |
| 4649 | LA/0854 | LA/0854/S/15 | Orbit Vision                            | Ophthalmology                                | 36, adelabu Str                                                           | Surulere     | Lagos |
| 4650 | LA/0856 | LA/0856/S/5  | Precise Medical<br>Diagnostic           | Radiology,<br>Ultrasanography,<br>Laboratory | 167, Iju Road, Fagba B/Stop<br>Agege Lagos                                | Agege        | Lagos |
| 4651 | LA/0856 | LA/0856/S/7  | Precise Medical<br>Diagnostic           | Radiology,<br>Ultrasanography,<br>Laboratory | 167, Iju Road, Fagba B/Stop<br>Agege Lagos                                | Agege        | Lagos |
| 4652 | LA/0856 | LA/0856/S/14 | Precise Medical<br>Diagnostic           | Radiology,<br>Ultrasanography,<br>Laboratory | 167, Iju Road, Fagba B/Stop<br>Agege Lagos                                | Agege        | Lagos |
| 4653 | LA/0858 | LA/0858/S/5  | Jeffis Specialist<br>Hospital           |                                              | 9 Adegbola Street, Alakuku,<br>Lagos                                      | Alimosho     | Lagos |
| 4654 | LA/0858 | LA/0858/S/8  | Jeffis Specialist<br>Hospital           |                                              | 9 Adegbola Street, Alakuku,<br>Lagos                                      | Alimosho     | Lagos |
| 4655 | LA/0858 | LA/0858/S/3  | Jeffis Specialist<br>Hospital           |                                              | 9 Adegbola Street, Alakuku,<br>Lagos                                      | Alimosho     | Lagos |
| 4656 | LA/0858 | LA/0858/S/1  | Jeffis Specialist<br>Hospital           |                                              | 9 Adegbola Street, Alakuku,<br>Lagos                                      | Alimosho     | Lagos |
| 4657 | LA/0859 | LA/0859/S/5  | O.A.U Medical<br>Diagnostic Centre      | Laboratory                                   | 577, Awori B/Stop Abule-<br>Egba Lagos-Abeokuta<br>Express Way            | Agege        | Lagos |
| 4658 | LA/0860 | LA/0860/S/7  | Naz Health Support<br>Services          | Laboratory,Radiol<br>ogy                     | 13, Winfunke Olowe St<br>Abule-Taylor B/Stop Off<br>Lagos-Abeokuta Exp Rd | Agege        | Lagos |
| 4659 | LA/0860 | LA/0860/S/5  | Naz Health Support<br>Services          | Laboratory,Radiol<br>ogy                     | 13, Winfunke Olowe St<br>Abule-Taylor B/Stop Off<br>Lagos-Abeokuta Exp Rd | Agege        | Lagos |
| 4660 | LA/0861 | LA/0861/S/1  | Lex Medical Centre                      |                                              | 5 Rahat Alabi Street, Iyana<br>Meiran B/Stop, Ijaiye, Lagos               | Alimosho     | Lagos |
| 4661 | LA/0861 | LA/0861/S/5  | Lex Medical Centre                      |                                              | 5 Rahat Alabi Street, Iyana<br>Meiran B/Stop, Ijaiye, Lagos               | Alimosho     | Lagos |
| 4662 | LA/0861 | LA/0861/S/2  | Lex Medical Centre                      |                                              | 5 Rahat Alabi Street, Iyana<br>Meiran B/Stop, Ijaiye, Lagos               | Alimosho     | Lagos |
| 4663 | LA/0861 | LA/0861/S/10 | Lex Medical Centre                      |                                              | 5 Rahat Alabi Street, Iyana<br>Meiran B/Stop, Ijaiye, Lagos               | Alimosho     | Lagos |

|      |         |              |                                        |                                       |                                                                                |              |       |
|------|---------|--------------|----------------------------------------|---------------------------------------|--------------------------------------------------------------------------------|--------------|-------|
| 4664 | LA/0867 | LA/0867/S/4  | Jaybion Nig Ltd                        | Pharmacy                              | Suite 7&8 Block A Bola Ahmed Tinubu Shopping Arcade Pen Cinema Agege           | Agege        | Lagos |
| 4665 | LA/0869 | LA/0869/S/7  | Ikeja X-Ray Clinic                     | Radiology                             | Lagos Airport Hotel                                                            | Ikeja        | Lagos |
| 4666 | LA/0872 | LA/0872/S/5  | Casay Diagnostic Centre                | Laboratory                            | Plot 20 Lateef Jakande Rd Davidson Plaza Omole                                 | Ikeja        | Lagos |
| 4667 | LA/0875 | LA/0875/S/4  | Dhug Pharmacy                          | Pharmacy                              | 21 Joel Ogunaike Street, GRA, Ikeja, Lagos                                     | Ikeja        | Lagos |
| 4668 | LA/0877 | LA/0877/S/8  | D Vine Dental Clinic                   | Dental                                | 25/27A Isaac John Street GRA, Lagos                                            | Ikeja        | Lagos |
| 4669 | LA/0879 | LA/0879/S/4  | Phebiox Pharm.                         | Pharmacy                              | 11 Osho Street, Opebi, Ikeja, Lagos                                            | Ikeja        | Lagos |
| 4670 | LA/0881 | LA/0881/S/4  | Anchor Link Pharm.                     | Pharmacy                              | 35, Ojodu Abiodun, Ojodu, Lagos                                                | Ikeja        | Lagos |
| 4671 | LA/0884 | LA/0884/S/5  | Omunua Laboratory                      | Laboratory                            | 21/23 Tonade Street, Ikeja, Lagos                                              | Ikeja        | Lagos |
| 4672 | LA/0890 | LA/0890/S/5  | Clina Laboratory                       | Laboratory                            | Shop 121, Opic Plaza, Mobolaji Bank, Anthony Way, Lagos                        | Ikeja        | Lagos |
| 4673 | LA/0893 | LA/0893/S/8  | Nene Dental Centre                     | Dentistry                             | 24 Allen Avenue, Lagos                                                         | Ikeja        | Lagos |
| 4674 | LA/0894 | LA/0894/S/8  | Osagie Dental Clinic                   | Dentistry                             | 299 Ikorodu Road, Maryland, Olatunde House, Lagos                              | Ikeja        | Lagos |
| 4675 | LA/0900 | LA/0900/S/4  | Pearly Rems Nig Ltd                    | Pharmacy                              | Plot 83 52 RD 5th Av Gowon Estate-Egbeda                                       | Alimosho     | Lagos |
| 4676 | LA/0901 | LA/0901/S/4  | Peace Way HealthCare Ltd               | Pharmacy                              | 34, Igando Road, Ologunfe B/Stop Igando Ikotu Lagos                            | Alimosho     | Lagos |
| 4677 | LA/0902 | LA/0902/S/4  | Myfil Pharmacy                         | Pharmacy                              | 167, Akowonjo Rd Lagos                                                         | Alimosho     | Lagos |
| 4678 | LA/0903 | LA/0903/S/4  | Kardinal Pharmaceutical Nig-Ltd        | Pharmacy                              | 134, Ijegun Road, Ikotun Lagos                                                 | Alimosho     | Lagos |
| 4679 | LA/0904 | LA/0904/S/4  | Juta Pharmacy Ltd                      | Pharmacy                              | 1, Baale Street, Ipaja Rd Ayobo-Ipaja Lagos                                    | Alimosho     | Lagos |
| 4680 | LA/0906 | LA/0906/S/4  | Juta Pharmacy Ltd                      | Pharmacy                              | 381, Isheri-Olofin Roundabout, Isheri-Idimu Lagos                              | Alimosho     | Lagos |
| 4681 | LA/0907 | LA/0907/S/7  | Joas Medical Diagonistix Ventures      | Radiology,Ultrasonography, Laboratory | 2, Okesuna Street, Opp Synagogue, Ikotun-Egbe Lagos                            | Alimosho     | Lagos |
| 4682 | LA/0907 | LA/0907/S/14 | Joas Medical Diagonistix Ventures      | Radiology,Ultrasonography, Laboratory | 2, Okesuna Street, Opp Synagogue, Ikotun-Egbe Lagos                            | Alimosho     | Lagos |
| 4683 | LA/0907 | LA/0907/S/5  | Joas Medical Diagonistix Ventures      | Radiology,Ultrasonography, Laboratory | 2, Okesuna Street, Opp Synagogue, Ikotun-Egbe Lagos                            | Alimosho     | Lagos |
| 4684 | LA/0909 | LA/0909/S/1  | Frola Pharmacy Ltd                     | Pharmacy                              | Mobile Police Barrack Rd Car Wash Bus Stop Idimu-Lagos                         | Alimosho     | Lagos |
| 4685 | LA/0910 | LA/0910/S/4  | Egbeda Pharmacy Ltd                    | Pharmacy                              | 14, Idimu Rd By Egbeda B/Stop Egbeda Lagos                                     | Alimosho     | Lagos |
| 4686 | LA/0911 | LA/0911/S/7  | Farnik x-ray and Ultrasound Centre     | Radiology,Ultrasonography             | 118,Abeokuta Express Way Adeolu Dopemu Lagos                                   | Alimosho     | Lagos |
| 4687 | LA/0911 | LA/0911/S/14 | Farnik x-ray and Ultrasound Centre     | Radiology,Ultrasonography             | 118,Abeokuta Express Way Adeolu Dopemu Lagos                                   | Alimosho     | Lagos |
| 4688 | LA/0912 | LA/0912/S/8  | Ropheka Dental Clinic Ltd              | Dental                                | 6 Dosu Ogundele Street Miccom Bus/Stop Akowonjo Lagos                          | Alimosho     | Lagos |
| 4689 | LA/0920 | LA/0920/S/4  | Fannimed Hospital                      |                                       | Block 210, Lily Road, LSDPC Med. Estate, Phase IV, Oba-Oguniyi Rd, Ogba, Lagos | Ikeja        | Lagos |
| 4690 | LA/0920 | LA/0920/S/3  | Fannimed Hospital                      |                                       | Block 210, Lily Road, LSDPC Med. Estate, Phase IV, Oba-Oguniyi Rd, Ogba, Lagos | Ikeja        | Lagos |
| 4691 | LA/0920 | LA/0920/S/5  | Fannimed Hospital                      |                                       | Block 210, Lily Road, LSDPC Med. Estate, Phase IV, Oba-Oguniyi Rd, Ogba, Lagos | Ikeja        | Lagos |
| 4692 | LA/0922 | LA/0922/S/1  | Utibe Abasi Hospital - Victoria Island | Primary                               | 897B Balarabe Musa Crescent Victoria Island Lagos                              | Lagos Island | Lagos |
| 4693 | LA/0922 | LA/0922/S/7  | Utibe Abasi Hospital - Victoria Island | Primary                               | 897B Balarabe Musa Crescent Victoria Island Lagos                              | Lagos Island | Lagos |
| 4694 | LA/0922 | LA/0922/S/5  | Utibe Abasi Hospital - Victoria Island | Primary                               | 897B Balarabe Musa Crescent Victoria Island Lagos                              | Lagos Island | Lagos |
| 4695 | LA/0922 | LA/0922/S/6  | Utibe Abasi Hospital - Victoria Island | Primary                               | 897B Balarabe Musa Crescent Victoria Island Lagos                              | Lagos Island | Lagos |
| 4696 | LA/0922 | LA/0922/S/3  | Utibe Abasi Hospital - Victoria Island | Primary                               | 897B Balarabe Musa Crescent Victoria Island Lagos                              | Lagos Island | Lagos |

|      |         |              |                                        |                       |                                                                              |                |       |
|------|---------|--------------|----------------------------------------|-----------------------|------------------------------------------------------------------------------|----------------|-------|
| 4697 | LA/0938 | LA/0938/S/19 | Bidson Clinic & Skin Centre            | Dermatology           | 368, Murtala Mohammed Way, Yaba, Lagos                                       | Lagos Mainland | Lagos |
| 4698 | LA/0940 | LA/0940/S/4  | Caraale Pharmacy Ltd                   | Pharmacy              | 77A Bola Street, Ebute-Metta, Lagos                                          | Lagos Mainland | Lagos |
| 4699 | LA/0941 | LA/0941/S/4  | Silverline Pharm. Ltd                  | Pharmacy              | 39, Akanro Street, Ilasa Maja, Mushin, Lagos                                 | Lagos Mainland | Lagos |
| 4700 | LA/0945 | LA/0945/S/7  | Hospital Support Diagnostic Centre Ltd | Radiology, Laboratory | 42, Demurin Str., Elebiju B/Stop, Ketu, Lagos                                | Kosofe         | Lagos |
| 4701 | LA/0945 | LA/0945/S/5  | Hospital Support Diagnostic Centre Ltd | Radiology, Laboratory | 42, Demurin Str., Elebiju B/Stop, Ketu, Lagos                                | Kosofe         | Lagos |
| 4702 | LA/0947 | LA/0947/S/7  | A-J Rapha Diagnostic Centre            | Radiology             | 30, Isheri Road, Akiode Omole, Ojodu, Lagos                                  | Ikeja          | Lagos |
| 4703 | LA/0948 | LA/0948/S/5  | P.J. Medical Diagnostic Laboratories   | Laboratory            | 2, Makoko Road, (Red Cross Compound) off Herbert Marcaulay Str., Yaba, Lagos | Lagos Mainland | Lagos |
| 4704 | LA/0949 | LA/0949/S/5  | Jat Medical Laboratory Service         | Laboratory            | 59, Lagos Road, Ikorodu, Lagos                                               | Ikorodu        | Lagos |
| 4705 | LA/0950 | LA/0950/S/5  | Clina-Labs (Nig) Ltd                   | Laboratory            | 31, Glover Str., Ebute-Metta, Lagos                                          | Lagos Mainland | Lagos |
| 4706 | LA/0951 | LA/0951/S/5  | Danifol Biotechnology Laboratories     | Laboratory            | 11, Gbeto Street, off Iyana Church, Iwaya Road, Lagos                        | Lagos Mainland | Lagos |
| 4707 | LA/0953 | LA/0953/S/5  | Ikate Diagnostic Centre                | Radiology, Laboratory | 59 Anobi Street, Ikate, Surulere, Lagos                                      | Surulere       | Lagos |
| 4708 | LA/0953 | LA/0953/S/7  | Ikate Diagnostic Centre                | Radiology, Laboratory | 59 Anobi Street, Ikate, Surulere, Lagos                                      | Surulere       | Lagos |
| 4709 | LA/0962 | LA/0962/S/4  | Osbud Pharmacy & Stores Ltd.           |                       | Giwa Shopping Complex, 22nd Rd, by TEXACO F/Station, Festac Town, Lagos      | Amuwo-Odofin   | Lagos |
| 4710 | LA/0967 | LA/0967/S/3  | Adeolu hospital                        |                       | 4-6, Oluwole Street, Akoka                                                   | Somolu         | Lagos |
| 4711 | LA/0971 | LA/0971/S/5  | adeshina hospital                      |                       | 29. daudu street, off church b/stop, oshodi                                  | Oshodi/Isolo   | Lagos |
| 4712 | LA/0974 | LA/0974/S/5  | ANNA MARIA HOSPITAL                    |                       | 19A DA SILVA STR. OFF BISOLA DUROSINMI DRIVE, LEKKI PHASE 1                  | Lagos Island   | Lagos |
| 4713 | LA/0981 | LA/0981/S/6  | BIO BATAM HOSPITAL                     |                       | 53 TIJANI STREET IYANA IPAJA OFF LAGOS ABEOKUTA EX/WAY, AGEGE                | Agege          | Lagos |
| 4714 | LA/0982 | LA/0982/S/3  | BRODIE MENDS MEMORIAL HOSPITAL         |                       | 8, KUGBUYI STREET MUSHIN                                                     | Mushin         | Lagos |
| 4715 | LA/0982 | LA/0982/S/5  | BRODIE MENDS MEMORIAL HOSPITAL         |                       | 8, KUGBUYI STREET MUSHIN                                                     | Mushin         | Lagos |
| 4716 | LA/0985 | LA/0985/S/11 | CITIZEN MEDICAL CENTER                 |                       | 86 NORMAN WILLIAMS STREET S/W IKOYI                                          | Eti-Osa        | Lagos |
| 4717 | LA/0985 | LA/0985/S/5  | CITIZEN MEDICAL CENTER                 |                       | 86 NORMAN WILLIAMS STREET S/W IKOYI                                          | Eti-Osa        | Lagos |
| 4718 | LA/0985 | LA/0985/S/6  | CITIZEN MEDICAL CENTER                 |                       | 86 NORMAN WILLIAMS STREET S/W IKOYI                                          | Eti-Osa        | Lagos |
| 4719 | LA/0985 | LA/0985/S/3  | CITIZEN MEDICAL CENTER                 |                       | 86 NORMAN WILLIAMS STREET S/W IKOYI                                          | Eti-Osa        | Lagos |
| 4720 | LA/0985 | LA/0985/S/1  | CITIZEN MEDICAL CENTER                 |                       | 86 NORMAN WILLIAMS STREET S/W IKOYI                                          | Eti-Osa        | Lagos |
| 4721 | LA/0992 | LA/0992/S/5  | F.C.E AKOKA                            |                       | AKOKA YABA                                                                   | Somolu         | Lagos |
| 4722 | LA/0995 | LA/0995/S/1  | FIRST FAITH MEDICAL CENTRE, SURULERE   |                       | 5, KARIMU COKER ORILE IGANMU                                                 | Surulere       | Lagos |
| 4723 | LA/0995 | LA/0995/S/4  | FIRST FAITH MEDICAL CENTRE, SURULERE   |                       | 5, KARIMU COKER ORILE IGANMU                                                 | Surulere       | Lagos |
| 4724 | LA/0995 | LA/0995/S/3  | FIRST FAITH MEDICAL CENTRE, SURULERE   |                       | 5, KARIMU COKER ORILE IGANMU                                                 | Surulere       | Lagos |
| 4725 | LA/0995 | LA/0995/S/5  | FIRST FAITH MEDICAL CENTRE, SURULERE   |                       | 5, KARIMU COKER ORILE IGANMU                                                 | Surulere       | Lagos |
| 4726 | LA/0995 | LA/0995/S/14 | FIRST FAITH MEDICAL CENTRE, SURULERE   |                       | 5, KARIMU COKER ORILE IGANMU                                                 | Surulere       | Lagos |
| 4727 | LA/0998 | LA/0998/S/3  | GOODTIDINGS HOSPITAL                   |                       | 37/39 FASORO STREET, SURULERE                                                | Surulere       | Lagos |
| 4728 | LA/1002 | LA/1002/S/3  | HOLY FAMILY CATHOLIC MEDICAL CENTER    |                       | 22 RD FESTAC TOWN                                                            | Amuwo-Odofin   | Lagos |
| 4729 | LA/1004 | LA/1004/S/12 | IMPERIAL MEDICAL CENTER                |                       | 65 BRICKFIELD ROAD, EBUTE METTA WEST                                         | Lagos Mainland | Lagos |
| 4730 | LA/1004 | LA/1004/S/1  | IMPERIAL MEDICAL CENTER                |                       | 65 BRICKFIELD ROAD, EBUTE METTA WEST                                         | Lagos Mainland | Lagos |
| 4731 | LA/1004 | LA/1004/S/6  | IMPERIAL MEDICAL CENTER                |                       | 65 BRICKFIELD ROAD, EBUTE METTA WEST                                         | Lagos Mainland | Lagos |
| 4732 | LA/1004 | LA/1004/S/2  | IMPERIAL MEDICAL CENTER                |                       | 65 BRICKFIELD ROAD, EBUTE METTA WEST                                         | Lagos Mainland | Lagos |

|      |         |              |                                     |  |                                           |                  |       |
|------|---------|--------------|-------------------------------------|--|-------------------------------------------|------------------|-------|
| 4733 | LA/1004 | LA/1004/S/5  | IMPERIAL MEDICAL CENTER             |  | 65 BRICKFIELD ROAD, EBUTE METTA WEST      | Lagos Mainland   | Lagos |
| 4734 | LA/1004 | LA/1004/S/10 | IMPERIAL MEDICAL CENTER             |  | 65 BRICKFIELD ROAD, EBUTE METTA WEST      | Lagos Mainland   | Lagos |
| 4735 | LA/1004 | LA/1004/S/3  | IMPERIAL MEDICAL CENTER             |  | 65 BRICKFIELD ROAD, EBUTE METTA WEST      | Lagos Mainland   | Lagos |
| 4736 | LA/1004 | LA/1004/S/11 | IMPERIAL MEDICAL CENTER             |  | 65 BRICKFIELD ROAD, EBUTE METTA WEST      | Lagos Mainland   | Lagos |
| 4737 | LA/1004 | LA/1004/S/15 | IMPERIAL MEDICAL CENTER             |  | 65 BRICKFIELD ROAD, EBUTE METTA WEST      | Lagos Mainland   | Lagos |
| 4738 | LA/1007 | LA/1007/S/5  | JLT SPECIALIST CLINIC & SKIN CENTER |  | 43A KAKAWA STREET, LAGOS                  | Lagos Island     | Lagos |
| 4739 | LA/1008 | LA/1008/S/6  | KRANZ SPECIALIST CLINIC & MAT. HOME |  | 9, UNITY ROAD OFF TOYIN STREET, IKEJA     | Ikeja            | Lagos |
| 4740 | LA/1009 | LA/1009/S/1  | LIBRA SPECIALIST HOSPITAL           |  | 1, ONISEMO STREET, OFF MARSHA SURULERE    | Surulere         | Lagos |
| 4741 | LA/1009 | LA/1009/S/5  | LIBRA SPECIALIST HOSPITAL           |  | 1, ONISEMO STREET, OFF MARSHA SURULERE    | Surulere         | Lagos |
| 4742 | LA/1009 | LA/1009/S/3  | LIBRA SPECIALIST HOSPITAL           |  | 1, ONISEMO STREET, OFF MARSHA SURULERE    | Surulere         | Lagos |
| 4743 | LA/1009 | LA/1009/S/6  | LIBRA SPECIALIST HOSPITAL           |  | 1, ONISEMO STREET, OFF MARSHA SURULERE    | Surulere         | Lagos |
| 4744 | LA/1011 | LA/1011/S/6  | life line children hospital         |  | 133 OGUNLANA DRIVE SURULERE               | Surulere         | Lagos |
| 4745 | LA/1011 | LA/1011/S/5  | life line children hospital         |  | 133 OGUNLANA DRIVE SURULERE               | Surulere         | Lagos |
| 4746 | LA/1013 | LA/1013/S/14 | living faith spec. hospital         |  | 37 modele str off ojuelegba               | Surulere         | Lagos |
| 4747 | LA/1013 | LA/1013/S/5  | living faith spec. hospital         |  | 37 modele str off ojuelegba               | Surulere         | Lagos |
| 4748 | LA/1013 | LA/1013/S/2  | living faith spec. hospital         |  | 37 modele str off ojuelegba               | Surulere         | Lagos |
| 4749 | LA/1014 | LA/1014/S/7  | longe medical center                |  | 126, olusegun osoba road, agbado crossing | Ifako-Ijaye      | Lagos |
| 4750 | LA/1014 | LA/1014/S/5  | longe medical center                |  | 126, olusegun osoba road, agbado crossing | Ifako-Ijaye      | Lagos |
| 4751 | LA/1014 | LA/1014/S/6  | longe medical center                |  | 126, olusegun osoba road, agbado crossing | Ifako-Ijaye      | Lagos |
| 4752 | LA/1019 | LA/1019/S/5  | Manifel Medical Center              |  | 192 ijegun road, ikotun                   | Alimosho         | Lagos |
| 4753 | LA/1023 | LA/1023/S/7  | National Orthopaedic Hospital       |  | 120/124 ikorodu rd.                       | Somolu           | Lagos |
| 4754 | LA/1023 | LA/1023/S/5  | National Orthopaedic Hospital       |  | 120/124 ikorodu rd.                       | Somolu           | Lagos |
| 4755 | LA/1023 | LA/1023/S/10 | National Orthopaedic Hospital       |  | 120/124 ikorodu rd.                       | Somolu           | Lagos |
| 4756 | LA/1023 | LA/1023/S/11 | National Orthopaedic Hospital       |  | 120/124 ikorodu rd.                       | Somolu           | Lagos |
| 4757 | LA/1023 | LA/1023/S/4  | National Orthopaedic Hospital       |  | 120/124 ikorodu rd.                       | Somolu           | Lagos |
| 4758 | LA/1029 | LA/1029/S/6  | Optimal Specialist Hospital         |  | 9 Gbaja Street Surulere                   | Surulere         | Lagos |
| 4759 | LA/1029 | LA/1029/S/3  | Optimal Specialist Hospital         |  | 9 Gbaja Street Surulere                   | Surulere         | Lagos |
| 4760 | LA/1029 | LA/1029/S/5  | Optimal Specialist Hospital         |  | 9 Gbaja Street Surulere                   | Surulere         | Lagos |
| 4761 | LA/1029 | LA/1029/S/4  | Optimal Specialist Hospital         |  | 9 Gbaja Street Surulere                   | Surulere         | Lagos |
| 4762 | LA/1034 | LA/1034/S/5  | QUINTA HOSPITAL                     |  | 182, KIRIKIRI ROAD, OLODI APAPA           | Ajeromi/Ifelodun | Lagos |
| 4763 | LA/1046 | LA/1046/S/5  | ST. CLEMENT HOSPITAL                |  | 321 RD. G-CLOSE 3RD AVENUE FESTAC TOWN    | Amuwo-Odofin     | Lagos |
| 4764 | LA/1046 | LA/1046/S/3  | ST. CLEMENT HOSPITAL                |  | 321 RD. G-CLOSE 3RD AVENUE FESTAC TOWN    | Amuwo-Odofin     | Lagos |
| 4765 | LA/1046 | LA/1046/S/14 | ST. CLEMENT HOSPITAL                |  | 321 RD. G-CLOSE 3RD AVENUE FESTAC TOWN    | Amuwo-Odofin     | Lagos |
| 4766 | LA/1047 | LA/1047/S/7  | ST. LOUIS MEDICAL CENTER            |  | 7A/9A ABIBU OKI MARINA                    | Lagos Island     | Lagos |
| 4767 | LA/1047 | LA/1047/S/5  | ST. LOUIS MEDICAL CENTER            |  | 7A/9A ABIBU OKI MARINA                    | Lagos Island     | Lagos |
| 4768 | LA/1050 | LA/1050/S/4  | ST.KIZITO (PHC)                     |  | ILASAN HOUSING ESTATE JAKANDE, LEKKI      | Eti-Osa          | Lagos |
| 4769 | LA/1050 | LA/1050/S/5  | ST.KIZITO (PHC)                     |  | ILASAN HOUSING ESTATE JAKANDE, LEKKI      | Eti-Osa          | Lagos |
| 4770 | LA/1053 | LA/1053/S/5  | STEPHENS HOSPITAL                   |  | 4 OYEWUMI CLOSE OFF FALOLU STR. SURULERE  | Surulere         | Lagos |
| 4771 | LA/1054 | LA/1054/S/3  | General Hospital, Surulere          |  | Randle Avenue                             | Surulere         | Lagos |
| 4772 | LA/1054 | LA/1054/S/6  | General Hospital, Surulere          |  | Randle Avenue                             | Surulere         | Lagos |
| 4773 | LA/1054 | LA/1054/S/5  | General Hospital, Surulere          |  | Randle Avenue                             | Surulere         | Lagos |

|      |         |              |                               |                                                                                                                       |                                     |          |       |
|------|---------|--------------|-------------------------------|-----------------------------------------------------------------------------------------------------------------------|-------------------------------------|----------|-------|
| 4774 | LA/1054 | LA/1054/S/1  | General Hospital,<br>Surulere |                                                                                                                       | Randle Avenue                       | Surulere | Lagos |
| 4775 | LA/1054 | LA/1054/S/4  | General Hospital,<br>Surulere |                                                                                                                       | Randle Avenue                       | Surulere | Lagos |
| 4776 | LA/1054 | LA/1054/S/8  | General Hospital,<br>Surulere |                                                                                                                       | Randle Avenue                       | Surulere | Lagos |
| 4777 | LA/1054 | LA/1054/S/2  | General Hospital,<br>Surulere |                                                                                                                       | Randle Avenue                       | Surulere | Lagos |
| 4778 | LA/1054 | LA/1054/S/7  | General Hospital,<br>Surulere |                                                                                                                       | Randle Avenue                       | Surulere | Lagos |
| 4779 | LA/1059 | LA/1059/S/2  | UPLIFT<br>MEDICALCENTER       |                                                                                                                       | 15, ADMIRALTY WAY, LEKKI<br>PHASE 1 | Eti-Osa  | Lagos |
| 4780 | LA/1059 | LA/1059/S/5  | UPLIFT<br>MEDICALCENTER       |                                                                                                                       | 15, ADMIRALTY WAY, LEKKI<br>PHASE 1 | Eti-Osa  | Lagos |
| 4781 | LA/1059 | LA/1059/S/6  | UPLIFT<br>MEDICALCENTER       |                                                                                                                       | 15, ADMIRALTY WAY, LEKKI<br>PHASE 1 | Eti-Osa  | Lagos |
| 4782 | LA/1059 | LA/1059/S/7  | UPLIFT<br>MEDICALCENTER       |                                                                                                                       | 15, ADMIRALTY WAY, LEKKI<br>PHASE 1 | Eti-Osa  | Lagos |
| 4783 | LA/1059 | LA/1059/S/1  | UPLIFT<br>MEDICALCENTER       |                                                                                                                       | 15, ADMIRALTY WAY, LEKKI<br>PHASE 1 | Eti-Osa  | Lagos |
| 4784 | LA/1059 | LA/1059/S/4  | UPLIFT<br>MEDICALCENTER       |                                                                                                                       | 15, ADMIRALTY WAY, LEKKI<br>PHASE 1 | Eti-Osa  | Lagos |
| 4785 | LA/1059 | LA/1059/S/3  | UPLIFT<br>MEDICALCENTER       |                                                                                                                       | 15, ADMIRALTY WAY, LEKKI<br>PHASE 1 | Eti-Osa  | Lagos |
| 4786 | LA/1062 | LA/1062/S/15 | UNITY HOSPITAL,<br>Surulere   |                                                                                                                       | 81, OJUELEGBA ROAD,<br>SURULERE     | Surulere | Lagos |
| 4787 | LA/1062 | LA/1062/S/3  | UNITY HOSPITAL,<br>Surulere   |                                                                                                                       | 81, OJUELEGBA ROAD,<br>SURULERE     | Surulere | Lagos |
| 4788 | LA/1062 | LA/1062/S/1  | UNITY HOSPITAL,<br>Surulere   |                                                                                                                       | 81, OJUELEGBA ROAD,<br>SURULERE     | Surulere | Lagos |
| 4789 | LA/1062 | LA/1062/S/6  | UNITY HOSPITAL,<br>Surulere   |                                                                                                                       | 81, OJUELEGBA ROAD,<br>SURULERE     | Surulere | Lagos |
| 4790 | LA/1062 | LA/1062/S/5  | UNITY HOSPITAL,<br>Surulere   |                                                                                                                       | 81, OJUELEGBA ROAD,<br>SURULERE     | Surulere | Lagos |
| 4791 | LA/1069 | LA/1069/S/2  | JON-KEN                       | Laboratory,orthop<br>aedics,O&G,int.m<br>ed,surgery,RADIO<br>LGY,ophthalmolgy,<br>paediatrics,ENT,Ur<br>ology, Dental | 20, SHONIBARE STREET,<br>AKOKA      | Somolu   | Lagos |
| 4792 | LA/1069 | LA/1069/S/6  | JON-KEN                       | Laboratory,orthop<br>aedics,O&G,int.m<br>ed,surgery,RADIO<br>LGY,ophthalmolgy,<br>paediatrics,ENT,Ur<br>ology, Dental | 20, SHONIBARE STREET,<br>AKOKA      | Somolu   | Lagos |
| 4793 | LA/1069 | LA/1069/S/3  | JON-KEN                       | Laboratory,orthop<br>aedics,O&G,int.m<br>ed,surgery,RADIO<br>LGY,ophthalmolgy,<br>paediatrics,ENT,Ur<br>ology, Dental | 20, SHONIBARE STREET,<br>AKOKA      | Somolu   | Lagos |
| 4794 | LA/1069 | LA/1069/S/5  | JON-KEN                       | Laboratory,orthop<br>aedics,O&G,int.m<br>ed,surgery,RADIO<br>LGY,ophthalmolgy,<br>paediatrics,ENT,Ur<br>ology, Dental | 20, SHONIBARE STREET,<br>AKOKA      | Somolu   | Lagos |
| 4795 | LA/1069 | LA/1069/S/10 | JON-KEN                       | Laboratory,orthop<br>aedics,O&G,int.m<br>ed,surgery,RADIO<br>LGY,ophthalmolgy,<br>paediatrics,ENT,Ur<br>ology, Dental | 20, SHONIBARE STREET,<br>AKOKA      | Somolu   | Lagos |
| 4796 | LA/1069 | LA/1069/S/1  | JON-KEN                       | Laboratory,orthop<br>aedics,O&G,int.m<br>ed,surgery,RADIO<br>LGY,ophthalmolgy,<br>paediatrics,ENT,Ur<br>ology, Dental | 20, SHONIBARE STREET,<br>AKOKA      | Somolu   | Lagos |
| 4797 | LA/1069 | LA/1069/S/7  | JON-KEN                       | Laboratory,orthop<br>aedics,O&G,int.m<br>ed,surgery,RADIO<br>LGY,ophthalmolgy,<br>paediatrics,ENT,Ur<br>ology, Dental | 20, SHONIBARE STREET,<br>AKOKA      | Somolu   | Lagos |
| 4798 | LA/1069 | LA/1069/S/15 | JON-KEN                       | Laboratory,orthop<br>aedics,O&G,int.m<br>ed,surgery,RADIO<br>LGY,ophthalmolgy,<br>paediatrics,ENT,Ur<br>ology, Dental | 20, SHONIBARE STREET,<br>AKOKA      | Somolu   | Lagos |



|      |         |              |                                      |                                                                                                    |                                                        |                  |       |
|------|---------|--------------|--------------------------------------|----------------------------------------------------------------------------------------------------|--------------------------------------------------------|------------------|-------|
| 4799 | LA/1069 | LA/1069/S/12 | JON-KEN                              | Laboratory,orthopaedics,O&G,int.med,surgery,RADIOLOGY,ophthalmolgy,paediatrics,ENT,Urology, Dental | 20, SHONIBARE STREET, AKOKA                            | Somolu           | Lagos |
| 4800 | LA/1069 | LA/1069/S/8  | JON-KEN                              | Laboratory,orthopaedics,O&G,int.med,surgery,RADIOLOGY,ophthalmolgy,paediatrics,ENT,Urology, Dental | 20, SHONIBARE STREET, AKOKA                            | Somolu           | Lagos |
| 4801 | LA/1069 | LA/1069/S/18 | JON-KEN                              | Laboratory,orthopaedics,O&G,int.med,surgery,RADIOLOGY,ophthalmolgy,paediatrics,ENT,Urology, Dental | 20, SHONIBARE STREET, AKOKA                            | Somolu           | Lagos |
| 4802 | LA/1090 | LA/1090/S/4  | MARIA-JID NIG. LTD                   | Pharmacy                                                                                           | 46,FASHORO ROAD,MUSHIN                                 | Mushin           | Lagos |
| 4803 | LA/1092 | LA/1092/S/4  | MEDIPLUS PHARMACY                    | Pharmacy                                                                                           | 45A SAKA TINUBU STR. V/ISLAND                          | Eti-Osa          | Lagos |
| 4804 | LA/1093 | LA/1093/S/14 | Noble Medicals (African X-ray House) | Radiology/uss                                                                                      | 140, Okota Road,College b/stop,okota                   | Oshodi/Isolo     | Lagos |
| 4805 | LA/1093 | LA/1093/S/7  | Noble Medicals (African X-ray House) | Radiology/uss                                                                                      | 140, Okota Road,College b/stop,okota                   | Oshodi/Isolo     | Lagos |
| 4806 | LA/1094 | LA/1094/S/4  | NURUSAT PHARM                        | Pharmacy                                                                                           | 13,JADEOSHOLA, OSHODI STR.OFF BROWN ROAD,SURULERE      | Surulere         | Lagos |
| 4807 | LA/1095 | LA/1095/S/5  | LIFE CARE DIAGNOSTICS CENTRE         | LABORATORY,USS                                                                                     | 51/512 ROAD JUNCTION FESTAC TOWN                       | Amuwo-Odofin     | Lagos |
| 4808 | LA/1095 | LA/1095/S/14 | LIFE CARE DIAGNOSTICS CENTRE         | LABORATORY,USS                                                                                     | 51/512 ROAD JUNCTION FESTAC TOWN                       | Amuwo-Odofin     | Lagos |
| 4809 | LA/1097 | LA/1097/S/7  | On-George Medical Services           | Radiology,USS                                                                                      | 1A, Adeoye Fafore Street On-George B/Stop, Ikotun Road | Alimosho         | Lagos |
| 4810 | LA/1097 | LA/1097/S/14 | On-George Medical Services           | Radiology,USS                                                                                      | 1A, Adeoye Fafore Street On-George B/Stop, Ikotun Road | Alimosho         | Lagos |
| 4811 | LA/1100 | LA/1100/S/8  | osagie dental clinic                 | DENTAL                                                                                             | 14,boyle's street,onikan                               | Lagos Island     | Lagos |
| 4812 | LA/1101 | LA/1101/S/4  | ABJ PHARMACY                         | Pharmacy                                                                                           | 31 BROWN ROAD, AGUDA, SURULERE                         | Surulere         | Lagos |
| 4813 | LA/1104 | LA/1104/S/4  | AJEKINS PHARMACY IFAKO               | Pharmacy                                                                                           | 11A IBRAHIM ONOSHOKUN STR BY NEPA B/STOP               | Kosofe           | Lagos |
| 4814 | LA/1108 | LA/1108/S/5  | ANOINTED MED. DIAGNOSTIC             | LABORATORY                                                                                         | 12,AROWOJOBE STR. MAFOLUKU OSHODI                      | Oshodi/Isolo     | Lagos |
| 4815 | LA/1109 | LA/1109/S/15 | ANUR EYE CENTER                      | Ophthalmology                                                                                      | 16, AKINSEMOYIN STR OFF BODE THOMAS                    | Surulere         | Lagos |
| 4816 | LA/1110 | LA/1110/S/15 | BAF EYE CENTER                       | Ophthalmology                                                                                      | 10, Fodayemi Street, off Coker Road, Ilupeju           | Mushin           | Lagos |
| 4817 | LA/1114 | LA/1114/S/5  | BIOMEDIC DIAGNOSTIC                  | LABORATORY                                                                                         | 65, ADENIRAN OGUNSANYA ,SURULERE                       | Surulere         | Lagos |
| 4818 | LA/1117 | LA/1117/S/5  | COMPREHENSIVE DIAG.CENTER            | Laboratory                                                                                         | 15 BODE THOMAS STR, SURULERE                           | Surulere         | Lagos |
| 4819 | LA/1118 | LA/1118/S/8  | CONTEMPORARY DENTAL CLINIC           | DENTAL                                                                                             | 63 BODE THOMAS STR, SURULERE                           | Surulere         | Lagos |
| 4820 | LA/1122 | LA/1122/S/5  | DE-KING MED. LAB                     | Laboratory                                                                                         | 61, ISOLO ROAD, EGBE                                   | Alimosho         | Lagos |
| 4821 | LA/1123 | LA/1123/S/8  | DIAMOND DENTAL                       | DENTAL                                                                                             | 142, BODE THOMAS ROAD, SURULERE                        | Surulere         | Lagos |
| 4822 | LA/1124 | LA/1124/S/5  | DIAMOND MED. DIAGNOSTIC              | Laboratory                                                                                         | 76, BANK ANTHONY WAY, IKEJA                            | Ikeja            | Lagos |
| 4823 | LA/1125 | LA/1125/S/5  | DIAMOND MED. DIAGNOSTIC              | Laboratory                                                                                         | 88 OLD OTA ROAD, ORILE AGEGE                           | Agege            | Lagos |
| 4824 | LA/1126 | LA/1126/S/5  | EBENEZER MED. DIAGNOSTIC             | Laboratory                                                                                         | 10A OLATUNDE ONIMOLE SURULERE                          | Surulere         | Lagos |
| 4825 | LA/1128 | LA/1128/S/7  | EL-LAB L.T.D                         | Radiology/USS, Laboratory                                                                          | PLOT A32 RD. SHOPPING COMPLEX FESTAC TOWN              | Amuwo-Odofin     | Lagos |
| 4826 | LA/1128 | LA/1128/S/14 | EL-LAB L.T.D                         | Radiology/USS, Laboratory                                                                          | PLOT A32 RD. SHOPPING COMPLEX FESTAC TOWN              | Amuwo-Odofin     | Lagos |
| 4827 | LA/1128 | LA/1128/S/5  | EL-LAB L.T.D                         | Radiology/USS, Laboratory                                                                          | PLOT A32 RD. SHOPPING COMPLEX FESTAC TOWN              | Amuwo-Odofin     | Lagos |
| 4828 | LA/1131 | LA/1131/S/4  | FIRST- EL SHADDAI HOSPITAL           | Pharmacy                                                                                           | 35 SAMUEL STREET, AKOWONJO                             | Alimosho         | Lagos |
| 4829 | LA/1140 | LA/1140/S/4  | HESS NIG. LTD.                       | Pharmacy                                                                                           | 130 AWOLOLO WAY, IKOYI                                 | Eti-Osa          | Lagos |
| 4830 | LA/1143 | LA/1143/S/4  | HOPE CEE PHARMACY                    | Pharmacy                                                                                           | 6, THOMAS STREET, EBUTE METTA WEST                     | Lagos Mainland   | Lagos |
| 4831 | LA/1144 | LA/1144/S/5  | INTEGRATED DIAG. LAB                 | LAB                                                                                                | 22 MONTGOMERY STR. YABA                                | Somolu           | Lagos |
| 4832 | LA/1148 | LA/1148/S/7  | JOY DIAGNOSTIC                       | Radiology                                                                                          | 93 MUYIBI STR. OFF WILMER OLODI APAPA                  | Ajeromi/Ifelodun | Lagos |

|      |         |              |                              |                          |                                                             |                  |       |
|------|---------|--------------|------------------------------|--------------------------|-------------------------------------------------------------|------------------|-------|
| 4833 | LA/1150 | LA/1150/S/6  | KIDZ CARE PAEDIATRIC CLINIC  | Paediatrics              | SHOP G13, VGC SHOPPING COMPLEX, VGC                         | Eti-Osa          | Lagos |
| 4834 | LA/1151 | LA/1151/S/13 | LADKEM EYE HOSPITAL          | Ophthalmology, OPTOMETRY | 27, NURU PNIWO STR. AGUDA SURULERE                          | Surulere         | Lagos |
| 4835 | LA/1151 | LA/1151/S/15 | LADKEM EYE HOSPITAL          | Ophthalmology, OPTOMETRY | 27, NURU PNIWO STR. AGUDA SURULERE                          | Surulere         | Lagos |
| 4836 | LA/1152 | LA/1152/S/5  | PATHFINDER DIAG. LAB         | LAB                      | 22 ROAD. K CLOSE BLK4 FLAT4 FESTAC TOWN                     | Amuwo-Odofin     | Lagos |
| 4837 | LA/1153 | LA/1153/S/4  | PHARMFLASH NIG. LTD          | Pharmacy                 | 38,CEMETARY STR. EBUTE METTA EAST                           | Lagos Mainland   | Lagos |
| 4838 | LA/1157 | LA/1157/S/4  | REHOBOTH PHARMACY            | Pharmacy                 | 32, ISHOLA ANIGBAJUMO OSHODI                                | Oshodi/Isolo     | Lagos |
| 4839 | LA/1158 | LA/1158/S/4  | ROCK AID PHARMACY            | Pharmacy                 | 15, ADEBOLA OJOMU STR. AGUDA                                | Surulere         | Lagos |
| 4840 | LA/1159 | LA/1159/S/4  | SALEM GATE PHARMACY          | Pharmacy                 | 13, ALH. MASHA ROAD, SURULERE                               | Surulere         | Lagos |
| 4841 | LA/1161 | LA/1161/S/13 | SMILEY OPTICAL SERV.         | OPTOMETRY                | 92,ADENIRAN OGUNSANYA SURULERE                              | Surulere         | Lagos |
| 4842 | LA/1162 | LA/1162/S/7  | SOLAFORT DIAG. CENTER        | Radiology,USS            | 24, IJAOYE STR. JIBOWU STR. YABA                            | Lagos Island     | Lagos |
| 4843 | LA/1162 | LA/1162/S/14 | SOLAFORT DIAG. CENTER        | Radiology,USS            | 24, IJAOYE STR. JIBOWU STR. YABA                            | Lagos Island     | Lagos |
| 4844 | LA/1167 | LA/1167/S/1  | ST.PAUL'S HOSPITAL           | Surgery                  | 71A ONDO STR.EBUTE METTA                                    | Lagos Mainland   | Lagos |
| 4845 | LA/1169 | LA/1169/S/7  | SURULERE CLINI-X-RAY         | Radiology                | 31, AYINDE GIWA STR. SURULERE                               | Surulere         | Lagos |
| 4846 | LA/1170 | LA/1170/S/5  | THARMA PRECISION DIAG. SERV. | Laboratory               | SUIT 11, ZUMA OFFICE COMPLEX,H CLOSE.FESTAC TOWN            | Amuwo-Odofin     | Lagos |
| 4847 | LA/1173 | LA/1173/S/11 | TONS PHYSIOTHERAPY CLINIC    | PHYSIOTHERAPY            | 37, AKOBI CRESCENT, S/LERE                                  | Surulere         | Lagos |
| 4848 | LA/1174 | LA/1174/S/4  | TONY CLAIRE PHARMACY         | Pharmacy                 | 126,IDEWU STR. OLODI APAPA                                  | Ajeromi/Ifelodun | Lagos |
| 4849 | LA/1175 | LA/1175/S/5  | TRUST MED. DIAG              | LAB                      | 21,SURULERE STR. DOPEMU AGEGE                               | Agege            | Lagos |
| 4850 | LA/1176 | LA/1176/S/4  | TRIPOD PHARMACY              | Pharmacy                 | 24, AGO PALACE WAY OKOTA                                    | Oshodi/Isolo     | Lagos |
| 4851 | LA/1177 | LA/1177/S/15 | TRUVISION EYE CARE CENTER    | Ophthalmology            | 37, IGBOSE ROAD, LAGOS                                      | Lagos Island     | Lagos |
| 4852 | LA/1180 | LA/1180/S/4  | VICTORY DRUGS                | Pharmacy                 | PLOT 57A.11ROAD. FESTAC TOWN                                | Amuwo-Odofin     | Lagos |
| 4853 | LA/1181 | LA/1181/S/13 | VISTA OPTICS L.T.D           | OPTOMETRY                | 7, MANUWA STREET, S,W IKOYI                                 | Eti-Osa          | Lagos |
| 4854 | LA/1185 | LA/1185/S/7  | X-RITE DIAGNOSTIC CENTER     | Radiology                | 10, OSAPA LONDON STR. LEKKI                                 | Eti-Osa          | Lagos |
| 4855 | LA/1189 | LA/1189/S/5  | Redeemed Medical Centre      |                          | Elias Close, Okokomaiko, Lagos                              | Ojo              | Lagos |
| 4856 | LA/1190 | LA/1190/S/15 | T & S Hospital               | Dental, Opthamology      | 26 Bombay Crescent, Apapa, Lagos                            | Apapa            | Lagos |
| 4857 | LA/1190 | LA/1190/S/8  | T & S Hospital               | Dental, Opthamology      | 26 Bombay Crescent, Apapa, Lagos                            | Apapa            | Lagos |
| 4858 | LA/1192 | LA/1192/S/4  | Golbyhealth Care Ltd.        | Pharmacy                 | 3.Oladoyinbo Str. By Avis Bus Stop Aguda-Ogba. Lagos        | Agege            | Lagos |
| 4859 | LA/1193 | LA/1193/S/1  | Healthwise Initiatives Ltd.  | Pharmacy                 | 37b Coker Road, Ilupeju, Lagos.                             | Mushin           | Lagos |
| 4860 | LA/1197 | LA/1197/S/1  | AFRIMED SPECIALIST HOSPITAL  |                          | 1 Williams Street, off Diya Street, Sawmill, Gbagada Lagos. | Somolu           | Lagos |
| 4861 | LA/1197 | LA/1197/S/6  | AFRIMED SPECIALIST HOSPITAL  |                          | 1 Williams Street, off Diya Street, Sawmill, Gbagada Lagos. | Somolu           | Lagos |
| 4862 | LA/1197 | LA/1197/S/2  | AFRIMED SPECIALIST HOSPITAL  |                          | 1 Williams Street, off Diya Street, Sawmill, Gbagada Lagos. | Somolu           | Lagos |
| 4863 | LA/1197 | LA/1197/S/3  | AFRIMED SPECIALIST HOSPITAL  |                          | 1 Williams Street, off Diya Street, Sawmill, Gbagada Lagos. | Somolu           | Lagos |
| 4864 | LA/1199 | LA/1199/S/6  | Folabi Medical Center        |                          | 78 Oworonsoki Road, Labule Bus Stop, Lagos                  | Kosofe           | Lagos |
| 4865 | LA/1199 | LA/1199/S/1  | Folabi Medical Center        |                          | 78 Oworonsoki Road, Labule Bus Stop, Lagos                  | Kosofe           | Lagos |
| 4866 | LA/1199 | LA/1199/S/3  | Folabi Medical Center        |                          | 78 Oworonsoki Road, Labule Bus Stop, Lagos                  | Kosofe           | Lagos |
| 4867 | LA/1200 | LA/1200/S/8  | Concise Diagnostic Centre    | Laboratory               | 14 Akinbayode Street, Papa Ajao, Mushin, Lagos              | Mushin           | Lagos |
| 4868 | LA/1201 | LA/1201/S/6  | Jim-Sam Hospital & Maternity |                          | 22 Gaskiya College Road, Ijora Badia, Apapa, Lagos          | Apapa            | Lagos |
| 4869 | LA/1201 | LA/1201/S/1  | Jim-Sam Hospital & Maternity |                          | 22 Gaskiya College Road, Ijora Badia, Apapa, Lagos          | Apapa            | Lagos |
| 4870 | LA/1201 | LA/1201/S/3  | Jim-Sam Hospital & Maternity |                          | 22 Gaskiya College Road, Ijora Badia, Apapa, Lagos          | Apapa            | Lagos |
| 4871 | LA/1201 | LA/1201/S/5  | Jim-Sam Hospital & Maternity |                          | 22 Gaskiya College Road, Ijora Badia, Apapa, Lagos          | Apapa            | Lagos |
| 4872 | LA/1214 | LA/1214/S/13 | Dena & Kich Eye Clinic       | Optometry                | 41 Osolo Way Off M/M Airport, Ajao Estate                   | Oshodi/Isolo     | Lagos |
| 4873 | LA/1217 | LA/1217/S/13 | Common Sight Ltd             | Optometry                | 82 Old Ojo Road, Kuje, Amuwo                                | Amuwo-Odofin     | Lagos |

|      |         |              |                                          |                                                           |                                                                      |                |        |
|------|---------|--------------|------------------------------------------|-----------------------------------------------------------|----------------------------------------------------------------------|----------------|--------|
| 4874 | LA/1224 | LA/1224/S/5  | Jim Sim Hospital & Maternity             |                                                           | 22 College Road, Ijora Badia, Ajao Estate                            | Amuwo-Odofin   | Lagos  |
| 4875 | LA/1224 | LA/1224/S/1  | Jim Sim Hospital & Maternity             |                                                           | 22 College Road, Ijora Badia, Ajao Estate                            | Amuwo-Odofin   | Lagos  |
| 4876 | LA/1224 | LA/1224/S/3  | Jim Sim Hospital & Maternity             |                                                           | 22 College Road, Ijora Badia, Ajao Estate                            | Amuwo-Odofin   | Lagos  |
| 4877 | LA/1224 | LA/1224/S/6  | Jim Sim Hospital & Maternity             |                                                           | 22 College Road, Ijora Badia, Ajao Estate                            | Amuwo-Odofin   | Lagos  |
| 4878 | LA/1229 | LA/1229/S/1  | Rockaid Pharmacy Store Limited           | Pharmacy                                                  | 15 Adebola Ojomu Street, Aguda                                       | Abakaliki      | Ebonyi |
| 4879 | LA/1230 | LA/1230/S/1  | Specmakers Ophthalmic Services           | Optometry                                                 | 129 Okota Road Near Cele B/Stop                                      | Oshodi/Isolo   | Lagos  |
| 4880 | LA/1232 | LA/1232/S/15 | Adetula Eye Clinic                       | Ophthalmology                                             | 46 Shasha Akowonjo                                                   | Alimosho       | Lagos  |
| 4881 | LA/1233 | LA/1233/S/4  | DE-Health Link                           | Pharmacy, Laboratory                                      | 125 Dopemu Road, Agege                                               | Agege          | Lagos  |
| 4882 | LA/1233 | LA/1233/S/5  | DE-Health Link                           | Pharmacy, Laboratory                                      | 125 Dopemu Road, Agege                                               | Agege          | Lagos  |
| 4883 | LA/1234 | LA/1234/S/15 | Phaton Best Eye & Optical Centre         | Ophthalmology                                             | 185 Ikorodu Road, Palmgrove                                          | Lagos Mainland | Lagos  |
| 4884 | LA/1235 | LA/1235/S/5  | Island Diagnostic                        | Laboratory                                                | 44 Obalende Road, Obalende                                           | Eti-Osa        | Lagos  |
| 4885 | LA/1237 | LA/1237/S/15 | Truvision Limited                        | Ophthalmology                                             | 84 Ozumba Mbadiwe, Victoria Island                                   | Eti-Osa        | Lagos  |
| 4886 | LA/1239 | LA/1239/S/8  | Billings Dental Clinic                   | Dental                                                    | Plot 26, Block 66, Kayode Taiwo Street, Magodo, GRA,                 | Ikeja          | Lagos  |
| 4887 | LA/1241 | LA/1241/S/3  | Good Seed Specialist Clinics             | O&G                                                       | 16 Okeho Street Ire-Akari Estate                                     | Oshodi/Isolo   | Lagos  |
| 4888 | LA/1242 | LA/1242/S/5  | Ajayi Memorial Hospital                  | Laboratory                                                | 159 Moshood Abiola Way, Ebute Metta                                  | Lagos Mainland | Lagos  |
| 4889 | LA/1245 | LA/1245/S/6  | Inland Specialist Hospital               | General Surgery, Laboratory, O & G, Paediatrics, Pharmacy | 11 Bola Owodunni Street, Behind Eskay Filling Station, Alapere, Ketu | Kosofe         | Lagos  |
| 4890 | LA/1245 | LA/1245/S/5  | Inland Specialist Hospital               | General Surgery, Laboratory, O & G, Paediatrics, Pharmacy | 11 Bola Owodunni Street, Behind Eskay Filling Station, Alapere, Ketu | Kosofe         | Lagos  |
| 4891 | LA/1245 | LA/1245/S/4  | Inland Specialist Hospital               | General Surgery, Laboratory, O & G, Paediatrics, Pharmacy | 11 Bola Owodunni Street, Behind Eskay Filling Station, Alapere, Ketu | Kosofe         | Lagos  |
| 4892 | LA/1245 | LA/1245/S/3  | Inland Specialist Hospital               | General Surgery, Laboratory, O & G, Paediatrics, Pharmacy | 11 Bola Owodunni Street, Behind Eskay Filling Station, Alapere, Ketu | Kosofe         | Lagos  |
| 4893 | LA/1245 | LA/1245/S/1  | Inland Specialist Hospital               | General Surgery, Laboratory, O & G, Paediatrics, Pharmacy | 11 Bola Owodunni Street, Behind Eskay Filling Station, Alapere, Ketu | Kosofe         | Lagos  |
| 4894 | LA/1246 | LA/1246/S/3  | Golden Victory Hospital                  | O&G, Paediatrics                                          | 49B Shasha Road, Shasha                                              | Alimosho       | Lagos  |
| 4895 | LA/1246 | LA/1246/S/6  | Golden Victory Hospital                  | O&G, Paediatrics                                          | 49B Shasha Road, Shasha                                              | Alimosho       | Lagos  |
| 4896 | LA/1249 | LA/1249/S/8  | Benjo Dental Clinic & Othopedic Practice | Dental                                                    | 30 Adekunle Fajuyi Way                                               | Ikeja          | Lagos  |
| 4897 | LA/1251 | LA/1251/S/13 | First Eye Clinic                         | Optometry                                                 | 66 Ijaiye Road, Ogba B/stop, Ikeja                                   | Ikeja          | Lagos  |
| 4898 | LA/1253 | LA/1253/S/5  | Nigerian Institute of Medical Research   | Laboratory                                                | 6 Edmund Crescent, Off M/Mohammed Way, Yaba                          | Lagos Mainland | Lagos  |
| 4899 | LA/1254 | LA/1254/S/8  | Asman Dental                             | Dental                                                    | 10 Bilikisu Iyede Street, Onike Roundabout                           | Lagos Mainland | Lagos  |
| 4900 | LA/1255 | LA/1255/S/12 | Royal Saints Specialist Hospital         | ENT                                                       | Raka Plaza, Plot 1439, Sanusi Fafunwa, Victoria Island               | Eti-Osa        | Lagos  |
| 4901 | LA/1257 | LA/1257/S/5  | Holy Rosary Medical Centre               |                                                           | 321 Road A Close House 18, Festac Town                               | Amuwo-Odofin   | Lagos  |
| 4902 | LA/1259 | LA/1259/S/1  | Duro Soleye Hospital                     |                                                           | 34 Allen Avenue, Ikeja                                               | Ikeja          | Lagos  |
| 4903 | LA/1259 | LA/1259/S/8  | Duro Soleye Hospital                     |                                                           | 34 Allen Avenue, Ikeja                                               | Ikeja          | Lagos  |
| 4904 | LA/1259 | LA/1259/S/2  | Duro Soleye Hospital                     |                                                           | 34 Allen Avenue, Ikeja                                               | Ikeja          | Lagos  |
| 4905 | LA/1260 | LA/1260/S/5  | Yombo Hospital and Maternity Home        |                                                           | 23 Oluyombo Street, Ikosi, Ketu                                      | Kosofe         | Lagos  |
| 4906 | LA/1260 | LA/1260/S/1  | Yombo Hospital and Maternity Home        |                                                           | 23 Oluyombo Street, Ikosi, Ketu                                      | Kosofe         | Lagos  |
| 4907 | LA/1260 | LA/1260/S/3  | Yombo Hospital and Maternity Home        |                                                           | 23 Oluyombo Street, Ikosi, Ketu                                      | Kosofe         | Lagos  |
| 4908 | LA/1261 | LA/1261/S/4  | Fellowship Hospital Ltd                  |                                                           | 9 Oliyide Street, Off Unity Road Ikeja                               | Ikeja          | Lagos  |
| 4909 | LA/1261 | LA/1261/S/3  | Fellowship Hospital Ltd                  |                                                           | 9 Oliyide Street, Off Unity Road Ikeja                               | Ikeja          | Lagos  |

|      |         |              |                                           |                          |                                                              |                  |       |
|------|---------|--------------|-------------------------------------------|--------------------------|--------------------------------------------------------------|------------------|-------|
| 4910 | LA/1261 | LA/1261/S/1  | Fellowship Hospital Ltd                   |                          | 9 Oliyide Street, Off Unity Road Ikeja                       | Ikeja            | Lagos |
| 4911 | LA/1261 | LA/1261/S/5  | Fellowship Hospital Ltd                   |                          | 9 Oliyide Street, Off Unity Road Ikeja                       | Ikeja            | Lagos |
| 4912 | LA/1270 | LA/1270/S/1  | Santa Maria Hospital                      |                          | 10, Santa Maria Street, Egan Igando                          | Alimosho         | Lagos |
| 4913 | LA/1270 | LA/1270/S/4  | Santa Maria Hospital                      |                          | 10, Santa Maria Street, Egan Igando                          | Alimosho         | Lagos |
| 4914 | LA/1270 | LA/1270/S/2  | Santa Maria Hospital                      |                          | 10, Santa Maria Street, Egan Igando                          | Alimosho         | Lagos |
| 4915 | LA/1270 | LA/1270/S/7  | Santa Maria Hospital                      |                          | 10, Santa Maria Street, Egan Igando                          | Alimosho         | Lagos |
| 4916 | LA/1270 | LA/1270/S/3  | Santa Maria Hospital                      |                          | 10, Santa Maria Street, Egan Igando                          | Alimosho         | Lagos |
| 4917 | LA/1273 | LA/1273/S/5  | Junction Bus Stop Diagnostic Centre,      | Laboratory               | 66 Oworo Road, Bus Stop, Oworonsoki, Lagos                   | Kosofe           | Lagos |
| 4918 | LA/1275 | LA/1275/S/3  | Jaiyeola clinic                           |                          | 4 Bankole Street by Famous Bust Stop, Pedro, Shomolu, Bariga | Somolu           | Lagos |
| 4919 | LA/1275 | LA/1275/S/2  | Jaiyeola clinic                           |                          | 4 Bankole Street by Famous Bust Stop, Pedro, Shomolu, Bariga | Somolu           | Lagos |
| 4920 | LA/1275 | LA/1275/S/1  | Jaiyeola clinic                           |                          | 4 Bankole Street by Famous Bust Stop, Pedro, Shomolu, Bariga | Somolu           | Lagos |
| 4921 | LA/1278 | LA/1278/S/1  | Tinu Hospital                             | Surgery, O&G, Laboratory | 86 Mushin Road, Isolo                                        | Oshodi/Isolo     | Lagos |
| 4922 | LA/1278 | LA/1278/S/3  | Tinu Hospital                             | Surgery, O&G, Laboratory | 86 Mushin Road, Isolo                                        | Oshodi/Isolo     | Lagos |
| 4923 | LA/1278 | LA/1278/S/5  | Tinu Hospital                             | Surgery, O&G, Laboratory | 86 Mushin Road, Isolo                                        | Oshodi/Isolo     | Lagos |
| 4924 | LA/1279 | LA/1279/S/13 | Dunamis Eye Centre                        | Optometry                | 203 Igboere Road, Lagos Island                               | Lagos Island     | Lagos |
| 4925 | LA/1280 | LA/1280/S/8  | Don Dental Clinic                         | Dentistry                | 3 Randle Road, Apapa, Lagos                                  | Apapa            | Lagos |
| 4926 | LA/1281 | LA/1281/S/8  | Rabboni Dental Clinic                     | Dentistry                | Suite 22 & 23 Ultimate Plaza, 21 Road, Festac Town, Lagos    | Amuwo-Odofin     | Lagos |
| 4927 | LA/1282 | LA/1282/S/5  | Health Point Diagnostic Centre            | Laboratory               | 73 College Road, Estate Bus Stop, Ogba, Lagos                | Ifako-Ijaye      | Lagos |
| 4928 | LA/1283 | LA/1283/S/3  | A. B. 10 Hospital                         |                          | 2 Adeleke Odunuga Close, Harmony Estate, Ifako-Ijaye         | Ifako-Ijaye      | Lagos |
| 4929 | LA/1283 | LA/1283/S/4  | A. B. 10 Hospital                         |                          | 2 Adeleke Odunuga Close, Harmony Estate, Ifako-Ijaye         | Ifako-Ijaye      | Lagos |
| 4930 | LA/1286 | LA/1286/S/7  | Yaba College of Technology Medical Centre |                          | Herbert Macaulay Way, Yaba                                   | Lagos Mainland   | Lagos |
| 4931 | LA/1286 | LA/1286/S/5  | Yaba College of Technology Medical Centre |                          | Herbert Macaulay Way, Yaba                                   | Lagos Mainland   | Lagos |
| 4932 | LA/1286 | LA/1286/S/4  | Yaba College of Technology Medical Centre |                          | Herbert Macaulay Way, Yaba                                   | Lagos Mainland   | Lagos |
| 4933 | LA/1290 | LA/1290/S/5  | Angel Hospital                            |                          | 20 Ecwa Church Road, Coker Village, Orile Iganmu             | Surulere         | Lagos |
| 4934 | LA/1290 | LA/1290/S/14 | Angel Hospital                            |                          | 20 Ecwa Church Road, Coker Village, Orile Iganmu             | Surulere         | Lagos |
| 4935 | LA/1299 | LA/1299/S/1  | Immanuel (M) Hospital                     |                          | 19 Adebayo Mokuolu Street, Anthony Village, Lagos            | Kosofe           | Lagos |
| 4936 | LA/1299 | LA/1299/S/3  | Immanuel (M) Hospital                     |                          | 19 Adebayo Mokuolu Street, Anthony Village, Lagos            | Kosofe           | Lagos |
| 4937 | LA/1304 | LA/1304/S/3  | St Mary's Specialist Hospital             |                          | Plot 458 Titilayo Adedoyin Street, Omole Phase 1, Ikeja      | Ikeja            | Lagos |
| 4938 | LA/1304 | LA/1304/S/6  | St Mary's Specialist Hospital             |                          | Plot 458 Titilayo Adedoyin Street, Omole Phase 1, Ikeja      | Ikeja            | Lagos |
| 4939 | LA/1311 | LA/1311/S/5  | Blue Cross Hospital                       |                          | 48 Ijaiye Road, Ogba                                         | Ifako-Ijaye      | Lagos |
| 4940 | LA/1311 | LA/1311/S/7  | Blue Cross Hospital                       |                          | 48 Ijaiye Road, Ogba                                         | Ifako-Ijaye      | Lagos |
| 4941 | LA/1313 | LA/1313/S/5  | P & G Medical Centre                      |                          | 29 Sanni Labode Street, New Oko-Oba, Lagos                   | Ifako-Ijaye      | Lagos |
| 4942 | LA/1315 | LA/1315/S/5  | Tolu Medical Centre                       |                          | 25 Amodu Tijani Street, Tolu Bus Stop, Olodi Apapa           | Apapa            | Lagos |
| 4943 | LA/1315 | LA/1315/S/14 | Tolu Medical Centre                       |                          | 25 Amodu Tijani Street, Tolu Bus Stop, Olodi Apapa           | Apapa            | Lagos |
| 4944 | LA/1317 | LA/1317/S/5  | Option Medical Laboratory                 | Laboratory               | 197/201 Ojo Road, Ajegunle                                   | Ajeromi/Ifelodun | Lagos |
| 4945 | LA/1318 | LA/1318/S/5  | Foresight Diagnostic Centre               | Laboratory               | 64 Ilogbo Road, Ajangbadi, Lagos                             | Ojo              | Lagos |
| 4946 | LA/1323 | LA/1323/S/5  | Rikky Hospital                            |                          | 193/197 Ojo Road Ajegunle                                    | Ajeromi/Ifelodun | Lagos |

|      |         |              |                                              |            |                                                                       |                |        |
|------|---------|--------------|----------------------------------------------|------------|-----------------------------------------------------------------------|----------------|--------|
| 4947 | LA/1327 | LA/1327/S/5  | Biomass Nigeria Limited                      |            | 3 Old Isheri Ijaye Road Aguda                                         | Ikeja          | Lagos  |
| 4948 | LA/1333 | LA/1333/S/2  | Dialyzer Medical Centre                      |            | 60, Arowojobe Street, Oseni Bus Stop, Oshodi                          | Oshodi/Isolo   | Lagos  |
| 4949 | LA/1333 | LA/1333/S/5  | Dialyzer Medical Centre                      |            | 60, Arowojobe Street, Oseni Bus Stop, Oshodi                          | Oshodi/Isolo   | Lagos  |
| 4950 | LA/1333 | LA/1333/S/1  | Dialyzer Medical Centre                      |            | 60, Arowojobe Street, Oseni Bus Stop, Oshodi                          | Oshodi/Isolo   | Lagos  |
| 4951 | LA/1333 | LA/1333/S/3  | Dialyzer Medical Centre                      |            | 60, Arowojobe Street, Oseni Bus Stop, Oshodi                          | Oshodi/Isolo   | Lagos  |
| 4952 | LA/1334 | LA/1334/S/3  | Molayo Medical Centre                        |            | 20 Akinyele Street, Oko Oba                                           | Agege          | Lagos  |
| 4953 | LA/1335 | LA/1335/S/5  | Nigeria French Language Clinic               |            | Nigeria French Village, Badagry                                       | Badagry        | Lagos  |
| 4954 | LA/1335 | LA/1335/S/4  | Nigeria French Language Clinic               |            | Nigeria French Village, Badagry                                       | Badagry        | Lagos  |
| 4955 | LA/1340 | LA/1340/S/8  | Ave Dental Clinic                            | Dental     | 68 Ago Palace Way Okota, Lagos                                        | Oshodi/Isolo   | Lagos  |
| 4956 | LA/1346 | LA/1346/S/4  | Merit Pharmacy                               |            | 1 Toyin Street, Ikeja                                                 | Ikeja          | Lagos  |
| 4957 | LA/1348 | LA/1348/S/4  | You and Lord Nig Ltd Pharmaceutical          | Pharmacy   | 73 College Road, Ifako, Agege                                         | Ifako-Ijaye    | Lagos  |
| 4958 | LA/1356 | LA/1356/S/3  | Eromon Specialist Hospital                   |            | 47 Ganiyat Street, Monkey Village, Mazamaza, near Navy gate           | Amuwo-Odofin   | Lagos  |
| 4959 | LA/1358 | LA/1358/S/8  | Lancet Dental & Eye clinic                   | Dental     | 41 Old Ojo Road, Maza-Maza                                            | Amuwo-Odofin   | Lagos  |
| 4960 | LA/1363 | LA/1363/S/5  | Sentinel Hospital                            | Laboratory | 1 Benson Akinyele Street, Okota                                       | Oshodi/Isolo   | Lagos  |
| 4961 | LA/1363 | LA/1363/S/1  | Sentinel Hospital                            | Laboratory | 1 Benson Akinyele Street, Okota                                       | Oshodi/Isolo   | Lagos  |
| 4962 | LA/1363 | LA/1363/S/3  | Sentinel Hospital                            | Laboratory | 1 Benson Akinyele Street, Okota                                       | Oshodi/Isolo   | Lagos  |
| 4963 | LA/1364 | LA/1364/S/13 | Bose Eye Clinic                              | Optometry  | 102A Adeniji Jones, Ikeja                                             | Ikeja          | Lagos  |
| 4964 | LA/1368 | LA/1368/S/1  | House of Care Hospital                       |            | 1 Ajayi Street off Ogundana Street, Allen Avenue, Ikeja               | Ikeja          | Lagos  |
| 4965 | LA/1370 | LA/1370/S/5  | Royan Hospital                               |            | 7 Aina Street Ojodu                                                   | Ikeja          | Lagos  |
| 4966 | LA/1370 | LA/1370/S/3  | Royan Hospital                               |            | 7 Aina Street Ojodu                                                   | Ikeja          | Lagos  |
| 4967 | LA/1370 | LA/1370/S/6  | Royan Hospital                               |            | 7 Aina Street Ojodu                                                   | Ikeja          | Lagos  |
| 4968 | LA/1370 | LA/1370/S/7  | Royan Hospital                               |            | 7 Aina Street Ojodu                                                   | Ikeja          | Lagos  |
| 4969 | LA/1370 | LA/1370/S/1  | Royan Hospital                               |            | 7 Aina Street Ojodu                                                   | Ikeja          | Lagos  |
| 4970 | LA/1373 | LA/1373/S/3  | Bernice Clinic & Maternity                   |            | No. 5 Fadare Street, Off Adedoyin Street Kosofe, Mile 12, Ketu, Lagos | Kosofe         | Lagos  |
| 4971 | LA/1386 | LA/1386/S/5  | El-Bethel Hospital                           |            | 323, Old Ojo Road, Oluti Bus Stop                                     | Amuwo-Odofin   | Lagos  |
| 4972 | LA/1386 | LA/1386/S/1  | El-Bethel Hospital                           |            | 323, Old Ojo Road, Oluti Bus Stop                                     | Amuwo-Odofin   | Lagos  |
| 4973 | LA/1387 | LA/1387/S/7  | First City Diagnosis                         |            | Plot 3, Jerry Iriabe Street, Lekki Phase 1                            | Eti-Osa        | Lagos  |
| 4974 | LA/1399 | LA/1399/S/3  | First Graceland Hospital                     |            | KM 42, Lekki-Epe Express Way, Abijoh Aja                              | Ibeju/Lekki    | Lagos  |
| 4975 | LA/1417 | LA/1417/S/5  | Sam Medical Laboratory                       |            | 30/32 Adenle Street, Alfa-Nla, Oke Koto, Agege                        | Agege          | Lagos  |
| 4976 | LA/1418 | LA/1418/S/8  | The Olives Dental Clinic                     |            | 30/32 Adenle Street, Alfa-Nla, Oke Koto, Agege                        | Agege          | Lagos  |
| 4977 | LA/1419 | LA/1419/S/7  | Esteem Diagnostic Centre                     |            | 142 Herbert Macaulay Way, Yaba                                        | Lagos Mainland | Lagos  |
| 4978 | LA/1420 | LA/1420/S/15 | Cathem Eye Hospital                          |            | 78, Adeniyi Jones, Ikeja                                              | Ikeja          | Lagos  |
| 4979 | LA/1421 | LA/1421/S/5  | Bepo Exact Medical Diagnostics               |            | 610 Abeokuta Express Way, Ijaiye                                      | Ifako-Ijaye    | Lagos  |
| 4980 | LA/1421 | LA/1421/S/7  | Bepo Exact Medical Diagnostics               |            | 610 Abeokuta Express Way, Ijaiye                                      | Ifako-Ijaye    | Lagos  |
| 4981 | LA/1422 | LA/1422/S/6  | The Shepherd Medical Centre                  |            | 2 Salvation Road Opebi                                                | Ikeja          | Lagos  |
| 4982 | LA/1423 | LA/1423/S/12 | Baaji Specialist Clinic                      |            | 11 Emina Crescent, Off Toyin Street                                   | Ikeja          | Lagos  |
| 4983 | LA/1424 | LA/1424/S/5  | Nkrees Lab & Diagnostic Centre               |            | 54, Old Ojo Road, Mosholashi Bus Stop, Kuje                           | Amuwo-Odofin   | Lagos  |
| 4984 | LA/1425 | LA/1425/S/5  | CJ Diamond Medical Diagnostic Centre         |            | 76, Mobolaji Bank Anthony Way                                         | Ikeja          | Lagos  |
| 4985 | LA/1426 | LA/1426/S/3  | Jaycee Ojini Specialist Hospital             |            | 26 Adedapo Street, Tejuosho Surulere                                  | Abakaliki      | Ebonyi |
| 4986 | LA/1426 | LA/1426/S/2  | Jaycee Ojini Specialist Hospital             |            | 26 Adedapo Street, Tejuosho Surulere                                  | Abakaliki      | Ebonyi |
| 4987 | LA/1427 | LA/1427/S/4  | Sanlix Pharmacy                              |            | 512 Road, F Close, House 8, Festac                                    | Amuwo-Odofin   | Lagos  |
| 4988 | LA/1428 | LA/1428/S/15 | Radiant Optics                               |            | 101 Allen Avenue,                                                     | Ikeja          | Lagos  |
| 4989 | LA/1434 | LA/1434/S/4  | Aviation Medical Clinics Headquarters (FAAN) |            | Murtala Mohammed Way, Domestic Airport, Ikeja                         | Ikeja          | Lagos  |
| 4990 | LA/1434 | LA/1434/S/5  | Aviation Medical Clinics Headquarters (FAAN) |            | Murtala Mohammed Way, Domestic Airport, Ikeja                         | Ikeja          | Lagos  |
| 4991 | LA/1436 | LA/1436/S/5  | Bob Specialist Hospitals                     |            | 22 Olugbede Street, off Aeor Road, Egbeda Estate                      | Alimosho       | Lagos  |

|      |         |              |                                         |  |                                                                                   |              |       |
|------|---------|--------------|-----------------------------------------|--|-----------------------------------------------------------------------------------|--------------|-------|
| 4992 | LA/1436 | LA/1436/S/3  | Bob Specialist Hospitals                |  | 22 Olugbede Street, off Aeor Road, Egbeda Estate                                  | Alimosho     | Lagos |
| 4993 | LA/1437 | LA/1437/S/4  | Chemart Pharmacy Limited                |  | Centage Plaza, 14 Allen Avenue. Ikeja                                             | Ikeja        | Lagos |
| 4994 | LA/1440 | LA/1440/S/1  | Britannia Hospital                      |  | Block 91, Plot 13 Aliu Animashaun Avenue, Lekki                                   | Eti-Osa      | Lagos |
| 4995 | LA/1440 | LA/1440/S/3  | Britannia Hospital                      |  | Block 91, Plot 13 Aliu Animashaun Avenue, Lekki                                   | Eti-Osa      | Lagos |
| 4996 | LA/1440 | LA/1440/S/6  | Britannia Hospital                      |  | Block 91, Plot 13 Aliu Animashaun Avenue, Lekki                                   | Eti-Osa      | Lagos |
| 4997 | LA/1440 | LA/1440/S/2  | Britannia Hospital                      |  | Block 91, Plot 13 Aliu Animashaun Avenue, Lekki                                   | Eti-Osa      | Lagos |
| 4998 | LA/1442 | LA/1442/S/5  | Bolakunmi-Idowu Memorial Medical Center |  | 5 Segun Ishola Street, Owuwu, Ikorodu                                             | Ikorodu      | Lagos |
| 4999 | LA/1448 | LA/1448/S/1  | Ohbee Hospital                          |  | 1, Kudaki Road, Hostel Bus stop, Egbe, Lagos, Lagos state                         | Alimosho     | Lagos |
| 5000 | LA/1448 | LA/1448/S/3  | Ohbee Hospital                          |  | 1, Kudaki Road, Hostel Bus stop, Egbe, Lagos, Lagos state                         | Alimosho     | Lagos |
| 5001 | LA/1448 | LA/1448/S/10 | Ohbee Hospital                          |  | 1, Kudaki Road, Hostel Bus stop, Egbe, Lagos, Lagos state                         | Alimosho     | Lagos |
| 5002 | LA/1449 | LA/1449/S/3  | Rivet Specialist Hospital               |  | 2/3 Cobham Street, Off Olutosin Ajayi Street, Ajao Estate, Lagos State            | Oshodi/Isolo | Lagos |
| 5003 | LA/1449 | LA/1449/S/2  | Rivet Specialist Hospital               |  | 2/3 Cobham Street, Off Olutosin Ajayi Street, Ajao Estate, Lagos State            | Oshodi/Isolo | Lagos |
| 5004 | LA/1449 | LA/1449/S/6  | Rivet Specialist Hospital               |  | 2/3 Cobham Street, Off Olutosin Ajayi Street, Ajao Estate, Lagos State            | Oshodi/Isolo | Lagos |
| 5005 | LA/1449 | LA/1449/S/1  | Rivet Specialist Hospital               |  | 2/3 Cobham Street, Off Olutosin Ajayi Street, Ajao Estate, Lagos State            | Oshodi/Isolo | Lagos |
| 5006 | LA/1451 | LA/1451/S/3  | Ambassador Medical Clinics              |  | 38/44 Mashalashi street off St. Gregory Road, Obalende, Ikoyi, Lagos State        | Eti-Osa      | Lagos |
| 5007 | LA/1451 | LA/1451/S/1  | Ambassador Medical Clinics              |  | 38/44 Mashalashi street off St. Gregory Road, Obalende, Ikoyi, Lagos State        | Eti-Osa      | Lagos |
| 5008 | LA/1454 | LA/1454/S/13 | Sparkling Eyes and Optical Services     |  | 16, Ibokun Street, Off Coker Road, By Town Planning Way, Ilupeju, Lagos State     | Mushin       | Lagos |
| 5009 | LA/1455 | LA/1455/S/6  | Chinaza Specialist Hospital             |  | 2, Hakeem Onitiri Street, Off Ali Dada Str,Off Ago Palace Way, Okota, Lagos State | Oshodi/Isolo | Lagos |
| 5010 | LA/1455 | LA/1455/S/1  | Chinaza Specialist Hospital             |  | 2, Hakeem Onitiri Street, Off Ali Dada Str,Off Ago Palace Way, Okota, Lagos State | Oshodi/Isolo | Lagos |
| 5011 | LA/1455 | LA/1455/S/3  | Chinaza Specialist Hospital             |  | 2, Hakeem Onitiri Street, Off Ali Dada Str,Off Ago Palace Way, Okota, Lagos State | Oshodi/Isolo | Lagos |
| 5012 | LA/1458 | LA/1458/S/5  | King Solomon Hospital                   |  | 4b Bola Crescent, Anthony Village, Somolu ,Lagos State                            | Kosofe       | Lagos |
| 5013 | LA/1458 | LA/1458/S/2  | King Solomon Hospital                   |  | 4b Bola Crescent, Anthony Village, Somolu ,Lagos State                            | Kosofe       | Lagos |
| 5014 | LA/1458 | LA/1458/S/3  | King Solomon Hospital                   |  | 4b Bola Crescent, Anthony Village, Somolu ,Lagos State                            | Kosofe       | Lagos |
| 5015 | LA/1458 | LA/1458/S/7  | King Solomon Hospital                   |  | 4b Bola Crescent, Anthony Village, Somolu ,Lagos State                            | Kosofe       | Lagos |
| 5016 | LA/1459 | LA/1459/S/13 | Eye spec opticals                       |  | 25A, Toyin street, Ikeja, Lagos State                                             | Ikeja        | Lagos |
| 5017 | LA/1462 | LA/1462/S/3  | Able God Hospital and Maternity Home    |  | 52, Ijsha Road, Opp Mobil Petrol Station, Adedeji, B/stop, ijeshatedo Lagos State | Surulere     | Lagos |
| 5018 | LA/1462 | LA/1462/S/1  | Able God Hospital and Maternity Home    |  | 52, Ijsha Road, Opp Mobil Petrol Station, Adedeji, B/stop, ijeshatedo Lagos State | Surulere     | Lagos |
| 5019 | LA/1463 | LA/1463/S/3  | Crest Hospital                          |  | 156/160 Isuti Road, Oremeji B/Stop, Egan, Lagos State                             | Alimosho     | Lagos |

|      |         |              |                                                |  |                                                                                                              |                |       |
|------|---------|--------------|------------------------------------------------|--|--------------------------------------------------------------------------------------------------------------|----------------|-------|
| 5020 | LA/1465 | LA/1465/S/13 | Providence Optometric Clinic                   |  | 6, Pearse Street, Off Ecobank Near Tejuosho Market, Yaba, Lagos State                                        | Lagos Mainland | Lagos |
| 5021 | LA/1467 | LA/1467/S/4  | Pharcept Hospital                              |  | Plot 74a, Block K, Olajomihin Road, Home of Grace B/Stop, Agbede Meeting, Ikorodu, Lagos State               | Ikorodu        | Lagos |
| 5022 | LA/1467 | LA/1467/S/5  | Pharcept Hospital                              |  | Plot 74a, Block K, Olajomihin Road, Home of Grace B/Stop, Agbede Meeting, Ikorodu, Lagos State               | Ikorodu        | Lagos |
| 5023 | LA/1467 | LA/1467/S/1  | Pharcept Hospital                              |  | Plot 74a, Block K, Olajomihin Road, Home of Grace B/Stop, Agbede Meeting, Ikorodu, Lagos State               | Ikorodu        | Lagos |
| 5024 | LA/1470 | LA/1470/S/5  | Ore Laboratory Services                        |  | 4, Olatilewa Street, Lawanson, 1st Floor, Surulere, (Beside SS Mulumba & David Catholic Church), Lagos State | Surulere       | Lagos |
| 5025 | LA/1472 | LA/1472/S/5  | St. Catherine of Siena Medical Centre          |  | 45/49 Old Ewu Road, Mafoluku, Oshodi, Lagos State                                                            | Oshodi/Isolo   | Lagos |
| 5026 | LA/1474 | LA/1474/S/8  | First Consultant Dental Clinic                 |  | 20/22 Ilupeju bye pass (Teju Hospital Premises) Ilupeju estate, Lagos State                                  | Mushin         | Lagos |
| 5027 | LA/1475 | LA/1475/S/3  | Standard Lifecare Clinic                       |  | 5, Paul Street, Off Sanni Balogun, Off Egba Road, New Oko Oba, Abule Egba Lagos State                        | Ifako-Ijaye    | Lagos |
| 5028 | LA/1476 | LA/1476/S/8  | Evans Dental Services LTD                      |  | 13A, Ajayi road, Off Yaya Abatan road, Ogba, Ikeja, Lagos State                                              | Ifako-Ijaye    | Lagos |
| 5029 | LA/1479 | LA/1479/S/8  | Iwosan Dental Clinic                           |  | 73, itire road, surulere, Lagos State                                                                        | Surulere       | Lagos |
| 5030 | LA/1480 | LA/1480/S/5  | Beulah medical Laboratory services             |  | Beulah Plaza: bethel suite; 14, Saint Finbarr's college road, Pako b/stop, Akoka, Yaba, Lagos State          | Somolu         | Lagos |
| 5031 | LA/1480 | LA/1480/S/4  | Beulah medical Laboratory services             |  | Beulah Plaza: bethel suite; 14, Saint Finbarr's college road, Pako b/stop, Akoka, Yaba, Lagos State          | Somolu         | Lagos |
| 5032 | LA/1483 | LA/1483/S/3  | Caring Trust Medical Clinic                    |  | 59, Jubrila Street, Johnson Bus Stop, Ijeshatedo, Lagos State                                                | Surulere       | Lagos |
| 5033 | LA/1484 | LA/1484/S/13 | ROYALTY EYE CLINIC                             |  | 48, olorunlogbon street, ANTHONY VILLAGE, Lagos State                                                        | Kosofe         | Lagos |
| 5034 | LA/1485 | LA/1485/S/11 | Ageless Physiotherapy Clinic                   |  | 19b, Ogundana Street, Hilton Bus stop, Allen Avenue, Ikeja Lagos State                                       | Ikeja          | Lagos |
| 5035 | LA/1490 | LA/1490/S/11 | Omega Physiotherapy and Backpain Clinic        |  | God is Able Plaza, 24 Road, Festac, Lagos State                                                              | Amuwo-Odofin   | Lagos |
| 5036 | LA/1491 | LA/1491/S/14 | Tropical Diagnostic development center limited |  | 223, Old Abeokuta motor road, opp railway police station, Pen Cinema, Lagos State                            | Agege          | Lagos |
| 5037 | LA/1491 | LA/1491/S/13 | Tropical Diagnostic development center limited |  | 223, Old Abeokuta motor road, opp railway police station, Pen Cinema, Lagos State                            | Agege          | Lagos |
| 5038 | LA/1491 | LA/1491/S/5  | Tropical Diagnostic development center limited |  | 223, Old Abeokuta motor road, opp railway police station, Pen Cinema, Lagos State                            | Agege          | Lagos |
| 5039 | LA/1492 | LA/1492/S/7  | Agape Care Diagnostic Services                 |  | 52, Ago Palace Way, Popoola B/Stop, Okota, Isolo - Lagos, Lagos State                                        | Oshodi/Isolo   | Lagos |
| 5040 | LA/1492 | LA/1492/S/5  | Agape Care Diagnostic Services                 |  | 52, Ago Palace Way, Popoola B/Stop, Okota, Isolo - Lagos, Lagos State                                        | Oshodi/Isolo   | Lagos |
| 5041 | LA/1494 | LA/1494/S/1  | Renaissance Medical                            |  | 12, Adeola Odeku Victoria Island, Lagos State                                                                | Eti-Osa        | Lagos |
| 5042 | LA/1494 | LA/1494/S/2  | Renaissance Medical                            |  | 12, Adeola Odeku Victoria Island, Lagos State                                                                | Eti-Osa        | Lagos |

|      |         |              |                                               |  |                                                                                                            |                |       |
|------|---------|--------------|-----------------------------------------------|--|------------------------------------------------------------------------------------------------------------|----------------|-------|
| 5043 | LA/1495 | LA/1495/S/5  | A. J Rapha Diagnostic Center                  |  | 10, Bashiru Street behind G.T. Bank, OJodu, Lagos State                                                    | Ikeja          | Lagos |
| 5044 | LA/1495 | LA/1495/S/7  | A. J Rapha Diagnostic Center                  |  | 10, Bashiru Street behind G.T. Bank, OJodu, Lagos State                                                    | Ikeja          | Lagos |
| 5045 | LA/1504 | LA/1504/S/8  | Divine Care Dental clinic                     |  | Unit 2, LSPDC Complex, Gbaja Road, Off Akere Rd, Surulere, Lagos State                                     | Surulere       | Lagos |
| 5046 | LA/1505 | LA/1505/S/4  | Mascot pharmacy and stores                    |  | 1, Munilari close, Cele Bus stop, Church Street, Shagari Estate, Lagos State                               | Alimosho       | Lagos |
| 5047 | LA/1506 | LA/1506/S/4  | In God we trust pharmacy                      |  | 2, Church close, Off Babalola Egbeda, Lagos State                                                          | Alimosho       | Lagos |
| 5048 | LA/1507 | LA/1507/S/8  | Celon dental clinic                           |  | 2, Olayemi street, off Nnobi street, Kilo bus stop, ikate surulere, Lagos State                            | Surulere       | Lagos |
| 5049 | LA/1510 | LA/1510/S/9  | Mayfield Medical Clinic                       |  | 308 Borno Way, Alagomeji, Yaba Lagos State                                                                 | Lagos Mainland | Lagos |
| 5050 | LA/1513 | LA/1513/S/1  | Dr Abimbola Awoniyi Memorial Hospital         |  | 183 Bamgbose street Lagos Island, Lagos State                                                              | Lagos Island   | Lagos |
| 5051 | LA/1513 | LA/1513/S/5  | Dr Abimbola Awoniyi Memorial Hospital         |  | 183 Bamgbose street Lagos Island, Lagos State                                                              | Lagos Island   | Lagos |
| 5052 | LA/1513 | LA/1513/S/2  | Dr Abimbola Awoniyi Memorial Hospital         |  | 183 Bamgbose street Lagos Island, Lagos State                                                              | Lagos Island   | Lagos |
| 5053 | LA/1513 | LA/1513/S/6  | Dr Abimbola Awoniyi Memorial Hospital         |  | 183 Bamgbose street Lagos Island, Lagos State                                                              | Lagos Island   | Lagos |
| 5054 | LA/1513 | LA/1513/S/3  | Dr Abimbola Awoniyi Memorial Hospital         |  | 183 Bamgbose street Lagos Island, Lagos State                                                              | Lagos Island   | Lagos |
| 5055 | LA/1513 | LA/1513/S/7  | Dr Abimbola Awoniyi Memorial Hospital         |  | 183 Bamgbose street Lagos Island, Lagos State                                                              | Lagos Island   | Lagos |
| 5056 | LA/1520 | LA/1520/S/8  | Alalade Memorial Hospital                     |  | No 67, Oshodi- Abeokuta Express Road, Dopemu, Ikeja, Lagos State                                           | Ikeja          | Lagos |
| 5057 | LA/1520 | LA/1520/S/15 | Alalade Memorial Hospital                     |  | No 67, Oshodi- Abeokuta Express Road, Dopemu, Ikeja, Lagos State                                           | Ikeja          | Lagos |
| 5058 | LA/1520 | LA/1520/S/5  | Alalade Memorial Hospital                     |  | No 67, Oshodi- Abeokuta Express Road, Dopemu, Ikeja, Lagos State                                           | Ikeja          | Lagos |
| 5059 | LA/1529 | LA/1529/S/13 | Modern eye clinic                             |  | plot 16/18, Isheri road Opp. Omole estate, Akiode bus stop, Ojodu, Lagos State                             | Ojo            | Lagos |
| 5060 | LA/1530 | LA/1530/S/15 | Sight Centre Ltd                              |  | 11 Olubi Str, Opp Town Hall Gate, Ita Elewa, Ikorodu, Lagos State                                          | Ikorodu        | Lagos |
| 5061 | LA/1531 | LA/1531/S/8  | Family Dental Care                            |  | 92, Awolowo road, Ikoyi, Lagos State                                                                       | Eti-Osa        | Lagos |
| 5062 | LA/1533 | LA/1533/S/6  | St. Anthony's Medical Centre & Maternity Home |  | 19, Lagos -Badagry Express Way Ojo, Lagos State                                                            | Ojo            | Lagos |
| 5063 | LA/1533 | LA/1533/S/10 | St. Anthony's Medical Centre & Maternity Home |  | 19, Lagos -Badagry Express Way Ojo, Lagos State                                                            | Ojo            | Lagos |
| 5064 | LA/1533 | LA/1533/S/3  | St. Anthony's Medical Centre & Maternity Home |  | 19, Lagos -Badagry Express Way Ojo, Lagos State                                                            | Ojo            | Lagos |
| 5065 | LA/1534 | LA/1534/S/11 | Physio - Fit Physiotherapy Clinic             |  | Block 1, Plot 4, Agric road by Abattoir new Oko- oba ( Behind Oceanic Bank) Fagba, Iju, Agege, Lagos State | Agege          | Lagos |
| 5066 | LA/1537 | LA/1537/S/8  | Dental Plus Ltd                               |  | No. 2 Deji Odunuga Street Off Adebayo Mokuolu Street, Anthony village, Lagos State                         | Kosofe         | Lagos |
| 5067 | LA/1539 | LA/1539/S/3  | Lifegate Specialist Hospital                  |  | 2B, Abiodun Jagun Str., Ogba , Ikeja, Lagos State                                                          | Ikeja          | Lagos |
| 5068 | LA/1540 | LA/1540/S/5  | Anthony cardinal okogie's medical center      |  | 1, akinsegun street, Oko Oba, Agege, Lagos State                                                           | Agege          | Lagos |
| 5069 | LA/1541 | LA/1541/S/1  | Bolutife Nursing Homel                        |  | 7, Vero Acha street, Jankara, Ijaiye- Ojokoro B/Stop, Lagos State                                          | Oshodi/Isolo   | Lagos |
| 5070 | LA/1541 | LA/1541/S/3  | Bolutife Nursing Homel                        |  | 7, Vero Acha street, Jankara, Ijaiye- Ojokoro B/Stop, Lagos State                                          | Oshodi/Isolo   | Lagos |



|      |         |              |                                      |  |                                                                                   |              |       |
|------|---------|--------------|--------------------------------------|--|-----------------------------------------------------------------------------------|--------------|-------|
| 5071 | LA/1542 | LA/1542/S/11 | wellpath physiotherapy               |  | 10, Baidua street off Keffi street, Ikoyi, Lagos State                            | Eti-Osa      | Lagos |
| 5072 | LA/1543 | LA/1543/S/10 | Liberty Specialist Hospital          |  | 2, Folayemi Street off Coker Road, Ilupeju, Lagos State                           | Mushin       | Lagos |
| 5073 | LA/1543 | LA/1543/S/5  | Liberty Specialist Hospital          |  | 2, Folayemi Street off Coker Road, Ilupeju, Lagos State                           | Mushin       | Lagos |
| 5074 | LA/1544 | LA/1544/S/8  | Royash dental services               |  | plot 9, blk 10, Ogba-ijaiye road, Lagos State                                     | Ikeja        | Lagos |
| 5075 | LA/1545 | LA/1545/S/4  | Juta pharmacy                        |  | 182, ikotun road, council b-stop, idimu, Lagos State                              | Alimosho     | Lagos |
| 5076 | LA/1548 | LA/1548/S/8  | SNOW WHITE DENTAL CLINIC             |  | 10, ATUNWA STREET, OFF UNITY RD/OLA AYINDE STREET, IKEJA, Lagos State             | Ikeja        | Lagos |
| 5077 | LA/1551 | LA/1551/S/5  | Help Immunoassay Laboratories        |  | 1 Ikorodu Road Maryland, Lagos State                                              | Ikorodu      | Lagos |
| 5078 | LA/1552 | LA/1552/S/13 | Metro Eye Clinic                     |  | 22, Keffi St, Ikoyi, Lagos State                                                  | Eti-Osa      | Lagos |
| 5079 | LA/1553 | LA/1553/S/5  | Urbane Medical Clinic                |  | 16, BAIYEWU CLOSE, OFF AJAYI RD, OGBA, Lagos State                                | Ifako-Ijaye  | Lagos |
| 5080 | LA/1554 | LA/1554/S/6  | Onwusikawa children's medical center |  | 20, Ogunbela Avenue, AGO PALACE, Okota, Lagos State                               | Oshodi/Isolo | Lagos |
| 5081 | LA/1557 | LA/1557/S/1  | Mary Ade specialist hospital         |  | 2, Tijani Ashogbon street, ilaje b/stop, Bariga, Lagos State                      | Somolu       | Lagos |
| 5082 | LA/1557 | LA/1557/S/5  | Mary Ade specialist hospital         |  | 2, Tijani Ashogbon street, ilaje b/stop, Bariga, Lagos State                      | Somolu       | Lagos |
| 5083 | LA/1557 | LA/1557/S/3  | Mary Ade specialist hospital         |  | 2, Tijani Ashogbon street, ilaje b/stop, Bariga, Lagos State                      | Somolu       | Lagos |
| 5084 | LA/1558 | LA/1558/S/13 | Boost opticals limited               |  | Suite H 108, Ikota shopping complex VGC, Lekki, Lagos State                       | Eti-Osa      | Lagos |
| 5085 | LA/1563 | LA/1563/S/1  | West Care Specialist Hospital        |  | 32, Samuel Street Vulcanizer bus stop Egbeda, Akowonjo, Lagos State               | Alimosho     | Lagos |
| 5086 | LA/1563 | LA/1563/S/8  | West Care Specialist Hospital        |  | 32, Samuel Street Vulcanizer bus stop Egbeda, Akowonjo, Lagos State               | Alimosho     | Lagos |
| 5087 | LA/1563 | LA/1563/S/3  | West Care Specialist Hospital        |  | 32, Samuel Street Vulcanizer bus stop Egbeda, Akowonjo, Lagos State               | Alimosho     | Lagos |
| 5088 | LA/1563 | LA/1563/S/6  | West Care Specialist Hospital        |  | 32, Samuel Street Vulcanizer bus stop Egbeda, Akowonjo, Lagos State               | Alimosho     | Lagos |
| 5089 | LA/1563 | LA/1563/S/2  | West Care Specialist Hospital        |  | 32, Samuel Street Vulcanizer bus stop Egbeda, Akowonjo, Lagos State               | Alimosho     | Lagos |
| 5090 | LA/1568 | LA/1568/S/1  | St. Nicholas Hospital                |  | 58 Campbell Street Lagos Island, Lagos State                                      | Lagos Island | Lagos |
| 5091 | LA/1568 | LA/1568/S/7  | St. Nicholas Hospital                |  | 58 Campbell Street Lagos Island, Lagos State                                      | Lagos Island | Lagos |
| 5092 | LA/1568 | LA/1568/S/4  | St. Nicholas Hospital                |  | 58 Campbell Street Lagos Island, Lagos State                                      | Lagos Island | Lagos |
| 5093 | LA/1568 | LA/1568/S/3  | St. Nicholas Hospital                |  | 58 Campbell Street Lagos Island, Lagos State                                      | Lagos Island | Lagos |
| 5094 | LA/1568 | LA/1568/S/14 | St. Nicholas Hospital                |  | 58 Campbell Street Lagos Island, Lagos State                                      | Lagos Island | Lagos |
| 5095 | LA/1568 | LA/1568/S/2  | St. Nicholas Hospital                |  | 58 Campbell Street Lagos Island, Lagos State                                      | Lagos Island | Lagos |
| 5096 | LA/1568 | LA/1568/S/6  | St. Nicholas Hospital                |  | 58 Campbell Street Lagos Island, Lagos State                                      | Lagos Island | Lagos |
| 5097 | LA/1568 | LA/1568/S/5  | St. Nicholas Hospital                |  | 58 Campbell Street Lagos Island, Lagos State                                      | Lagos Island | Lagos |
| 5098 | LA/1572 | LA/1572/S/1  | Bolutife Hospital                    |  | 26, Eweje street, Mafoluku, Oshodi, Lagos State                                   | Oshodi/Isolo | Lagos |
| 5099 | LA/1572 | LA/1572/S/3  | Bolutife Hospital                    |  | 26, Eweje street, Mafoluku, Oshodi, Lagos State                                   | Oshodi/Isolo | Lagos |
| 5100 | LA/1573 | LA/1573/S/4  | Abek Pharmacy                        |  | 143, Ipaja road, Agege, Lagos State                                               | Agege        | Lagos |
| 5101 | LA/1574 | LA/1574/S/13 | Rekis Eye Centre Limited             |  | Olatunji House, Ground Floor, 299, Ikorodu Road, Idi-Iroko, Maryland, Lagos State | Kosofe       | Lagos |
| 5102 | LA/1575 | LA/1575/S/15 | Faratori eye center                  |  | 187, igbosere road, lagos island, Lagos State                                     | Lagos Island | Lagos |

|      |         |              |                                               |  |                                                                                                |                  |       |
|------|---------|--------------|-----------------------------------------------|--|------------------------------------------------------------------------------------------------|------------------|-------|
| 5103 | LA/1578 | LA/1578/S/14 | Ojuelegba Scan & x-ray Centre                 |  | 77 Ojuelegba road, Lagos State                                                                 | Surulere         | Lagos |
| 5104 | LA/1578 | LA/1578/S/7  | Ojuelegba Scan & x-ray Centre                 |  | 77 Ojuelegba road, Lagos State                                                                 | Surulere         | Lagos |
| 5105 | LA/1578 | LA/1578/S/5  | Ojuelegba Scan & x-ray Centre                 |  | 77 Ojuelegba road, Lagos State                                                                 | Surulere         | Lagos |
| 5106 | LA/1581 | LA/1581/S/3  | Ahmadiya Muslim Hospital                      |  | 39, Payne crescent, Apapa, Lagos State                                                         | Ajeromi/Ifelodun | Lagos |
| 5107 | LA/1581 | LA/1581/S/2  | Ahmadiya Muslim Hospital                      |  | 39, Payne crescent, Apapa, Lagos State                                                         | Ajeromi/Ifelodun | Lagos |
| 5108 | LA/1581 | LA/1581/S/7  | Ahmadiya Muslim Hospital                      |  | 39, Payne crescent, Apapa, Lagos State                                                         | Ajeromi/Ifelodun | Lagos |
| 5109 | LA/1585 | LA/1585/S/8  | Hygei dental and eye clinic                   |  | 14, sowemimo street, GRA, Ikeja, Lagos State                                                   | Ikeja            | Lagos |
| 5110 | LA/1585 | LA/1585/S/15 | Hygei dental and eye clinic                   |  | 14, sowemimo street, GRA, Ikeja, Lagos State                                                   | Ikeja            | Lagos |
| 5111 | LA/1587 | LA/1587/S/13 | Crystal eye consult                           |  | 140, Bode Thomas, surulere, Lagos State                                                        | Surulere         | Lagos |
| 5112 | LA/1588 | LA/1588/S/13 | Just Vision Optical & Eye Centre              |  | 62 Adeniran Ogunsanya St Surulere, Lagos State                                                 | Surulere         | Lagos |
| 5113 | LA/1589 | LA/1589/S/8  | Nabile Dental surgey                          |  | 47a corporation drive, dolphin estate, Ikoyi, Lagos State                                      | Eti-Osa          | Lagos |
| 5114 | LA/1591 | LA/1591/S/1  | St. Raphael Divine Mercy Specialist Hospital  |  | Boge Town, Ijede Road, Ikorodu, Lagos State                                                    | Ikorodu          | Lagos |
| 5115 | LA/1591 | LA/1591/S/4  | St. Raphael Divine Mercy Specialist Hospital  |  | Boge Town, Ijede Road, Ikorodu, Lagos State                                                    | Ikorodu          | Lagos |
| 5116 | LA/1591 | LA/1591/S/13 | St. Raphael Divine Mercy Specialist Hospital  |  | Boge Town, Ijede Road, Ikorodu, Lagos State                                                    | Ikorodu          | Lagos |
| 5117 | LA/1591 | LA/1591/S/3  | St. Raphael Divine Mercy Specialist Hospital  |  | Boge Town, Ijede Road, Ikorodu, Lagos State                                                    | Ikorodu          | Lagos |
| 5118 | LA/1591 | LA/1591/S/5  | St. Raphael Divine Mercy Specialist Hospital  |  | Boge Town, Ijede Road, Ikorodu, Lagos State                                                    | Ikorodu          | Lagos |
| 5119 | LA/1598 | LA/1598/S/5  | Hallmark clinical and children diagnostic lab |  | 4 Aradula Close Sabo-Oniba, btw peoples and church bus stops, off Alaba int'l mkt, Lagos State | Ojo              | Lagos |
| 5120 | LA/1605 | LA/1605/S/4  | Teslon Pharmacy Nig Ltd                       |  | 204, lagos Rd, Agric B/S Ikorodu, Lagos State                                                  | Ikorodu          | Lagos |
| 5121 | LA/1606 | LA/1606/S/4  | Edmic Pharmacy Ltd                            |  | 248 Iju water works rd, Iju, Lagos State                                                       | Ifako-Ijaye      | Lagos |
| 5122 | LA/1607 | LA/1607/S/6  | Theo Hospital                                 |  | 25, Davies street off obanle aro bus stop, ketu, Lagos State                                   | Kosofe           | Lagos |
| 5123 | LA/1607 | LA/1607/S/5  | Theo Hospital                                 |  | 25, Davies street off obanle aro bus stop, ketu, Lagos State                                   | Kosofe           | Lagos |
| 5124 | LA/1607 | LA/1607/S/3  | Theo Hospital                                 |  | 25, Davies street off obanle aro bus stop, ketu, Lagos State                                   | Kosofe           | Lagos |
| 5125 | LA/1607 | LA/1607/S/1  | Theo Hospital                                 |  | 25, Davies street off obanle aro bus stop, ketu, Lagos State                                   | Kosofe           | Lagos |
| 5126 | LA/1609 | LA/1609/S/5  | Tejuosho Diag & Clinical Serv. Ltd            |  | Shop 7 & 8, Con-oil Plaza, Opp Ikeja Gen, Hosp. Ikeja, Lagos State                             | Ikeja            | Lagos |
| 5127 | LA/1609 | LA/1609/S/14 | Tejuosho Diag & Clinical Serv. Ltd            |  | Shop 7 & 8, Con-oil Plaza, Opp Ikeja Gen, Hosp. Ikeja, Lagos State                             | Ikeja            | Lagos |
| 5128 | LA/1613 | LA/1613/S/3  | Magodo Specialist Hospital LIMITED            |  | 10, Jaiye Oyedotun street, Magodo GRA, Lagos State                                             | Kosofe           | Lagos |
| 5129 | LA/1615 | LA/1615/S/3  | The Heritage Hospital LTD                     |  | 29, Anyantuga St. Mushin Lagos State                                                           | Mushin           | Lagos |
| 5130 | LA/1616 | LA/1616/S/13 | Phoenix eye clinic                            |  | Scapular Plaza, Km 17, Lekki-Epe expressway(beside blue island), Lagos State                   | Eti-Osa          | Lagos |
| 5131 | LA/1625 | LA/1625/S/8  | Roberts dental specialist clinic              |  | 19, ogunlana drive (1st floor) surulere, Lagos State                                           | Surulere         | Lagos |
| 5132 | LA/1628 | LA/1628/S/4  | Interpharm Ltd.                               |  | 113 Oriwu Rd, Ikorodu, Lagos State                                                             | Ikorodu          | Lagos |
| 5133 | LA/1631 | LA/1631/S/4  | Pharm-Affairs (Nig) Ltd                       |  | 122 Ogudu Rd, Ogudu GRA, Lagos State                                                           | Kosofe           | Lagos |
| 5134 | LA/1634 | LA/1634/S/15 | FOLAREM eye SPECIALIST HOSPITAL               |  | 25, Iperu Akesan street by alagutan traffic light junction, iyana ipaja, Lagos State           | Alimosho         | Lagos |
| 5135 | LA/1635 | LA/1635/S/8  | Kapul Dental Clinic                           |  | Excelsior Hotel 3-15 Ede Str Apapa, Lagos State                                                | Apapa            | Lagos |
| 5136 | LA/1636 | LA/1636/S/5  | G.G Able Medical Diagnostic center            |  | 194, ijegun road, Ikotun, Lagos State                                                          | Alimosho         | Lagos |

|      |         |              |                                              |  |                                                                                                        |              |       |
|------|---------|--------------|----------------------------------------------|--|--------------------------------------------------------------------------------------------------------|--------------|-------|
| 5137 | LA/1639 | LA/1639/S/7  | AA & A Medical Diagnostics                   |  | 49, Ishaga RD Surulere, Lagos State                                                                    | Surulere     | Lagos |
| 5138 | LA/1640 | LA/1640/S/8  | Raphina Dental Clinic                        |  | 18, Itire road by randle avenue, itire junction, surulere, Lagos State                                 | Surulere     | Lagos |
| 5139 | LA/1641 | LA/1641/S/5  | Maranatha medical diagnostics                |  | Alice shopping center, 101 aina street; off isheri road, grammar school b/st, ojodu-Ikeja, Lagos State | Ikeja        | Lagos |
| 5140 | LA/1641 | LA/1641/S/7  | Maranatha medical diagnostics                |  | Alice shopping center, 101 aina street; off isheri road, grammar school b/st, ojodu-Ikeja, Lagos State | Ikeja        | Lagos |
| 5141 | LA/1644 | LA/1644/S/4  | Fenomas Pharm Ltd                            |  | 41 Daodu Str. Oshodi, Lagos State                                                                      | Oshodi/Isolo | Lagos |
| 5142 | LA/1646 | LA/1646/S/4  | Vatican Bells pharmaceuticals LTD            |  | 60,Ogunlana Drive surulere, Lagos State                                                                | Surulere     | Lagos |
| 5143 | LA/1648 | LA/1648/S/1  | Fuja Medical Centre                          |  | 23 Elegbata St. Apongbon, Lagos Island, Lagos State                                                    | Lagos Island | Lagos |
| 5144 | LA/1648 | LA/1648/S/3  | Fuja Medical Centre                          |  | 23 Elegbata St. Apongbon, Lagos Island, Lagos State                                                    | Lagos Island | Lagos |
| 5145 | LA/1648 | LA/1648/S/5  | Fuja Medical Centre                          |  | 23 Elegbata St. Apongbon, Lagos Island, Lagos State                                                    | Lagos Island | Lagos |
| 5146 | LA/1650 | LA/1650/S/4  | Civic Pharmaceutical Ltd                     |  | 176 Abeokuta Exp-Way, Iyana-Ipaja, Lagos State                                                         | Alimosho     | Lagos |
| 5147 | LA/1651 | LA/1651/S/8  | Stellar dental clinic                        |  | 45, olufemi road, off ogulana drive, surulere, Lagos State                                             | Surulere     | Lagos |
| 5148 | LA/1652 | LA/1652/S/7  | Funtom Spec.Med.Diag. Centre                 |  | 19b Iganmu Rd New rd B/stop Lagos State                                                                | Surulere     | Lagos |
| 5149 | LA/1658 | LA/1658/S/3  | True Care Model Hospital Ltd                 |  | 19, AdeyemiApena Street,Papa, Epe. Behind The General Hospital, Epe Lagos State                        | Epe          | Lagos |
| 5150 | LA/1661 | LA/1661/S/5  | Nigeria Customs service Medical Centre,      |  | Nigeria Customs Service Medical Centre, Seme Badagri Lagos State                                       | Badagry      | Lagos |
| 5151 | LA/1661 | LA/1661/S/4  | Nigeria Customs service Medical Centre,      |  | Nigeria Customs Service Medical Centre, Seme Badagri Lagos State                                       | Badagry      | Lagos |
| 5152 | LA/1662 | LA/1662/S/5  | Mojol Hospital Laboratory                    |  | 20, Church Street, Sasa, Bammake, Lagos State                                                          | Alimosho     | Lagos |
| 5153 | LA/1664 | LA/1664/S/4  | Broad Associates Limited                     |  | No 1B Haruna Street, Off College Road, Ifako Ijaye, Lagos State                                        | Ifako-Ijaye  | Lagos |
| 5154 | LA/1669 | LA/1669/S/4  | Lanbib Pharmacy & stores LTD                 |  | Shop 496, School bus stop, Abesan estate, Ipaja, Lagos State                                           | Alimosho     | Lagos |
| 5155 | LA/1671 | LA/1671/S/4  | Pepat Ventures (Nig) Ltd                     |  | 11 adeola Str, Medina Estate, Gbagada, Lagos State                                                     | Kosofe       | Lagos |
| 5156 | LA/1673 | LA/1673/S/4  | Robson Pharm. Ltd                            |  | 16 Oresegun Crescent,Off Odunsi Str, Bariga, Lagos State                                               | Somolu       | Lagos |
| 5157 | LA/1676 | LA/1676/S/4  | Fontana Chemists LTD                         |  | 23,Ogunlana Drive, Surulere, Lagos State                                                               | Surulere     | Lagos |
| 5158 | LA/1680 | LA/1680/S/4  | Govatek Pharm & Stores                       |  | 260, Isawo Rd, RSA B/stop, Abule Cole, Ajaguro Agric, Owutu, Ikorodu, Lagos State                      | Ikorodu      | Lagos |
| 5159 | LA/1681 | LA/1681/S/1  | Rabboni specialist Hospital                  |  | 7, Eyiowuawi street, Pedro Lagos Lagos State                                                           | Somolu       | Lagos |
| 5160 | LA/1683 | LA/1683/S/14 | Mt. MORIAH hospital                          |  | 1/3, Jolade ayoola street, off mosalasi road, Egan, Lagos State                                        | Alimosho     | Lagos |
| 5161 | LA/1684 | LA/1684/S/5  | Global viva medical                          |  | 113, ojuelegba road, surulere, Lagos State                                                             | Surulere     | Lagos |
| 5162 | LA/1686 | LA/1686/S/5  | Viscol Medical Laboratory                    |  | 12B Strachan Str. Off Lapal House Lagos Island, Lagos State                                            | Lagos Island | Lagos |
| 5163 | LA/1688 | LA/1688/S/13 | Swift eye care                               |  | 9, Amodu Ojikutu str. Off Bishop Oluwole str V/I, Lagos State                                          | Eti-Osa      | Lagos |
| 5164 | LA/1689 | LA/1689/S/1  | His Stripes Specialist Hospital              |  | 19/22 Savage St. Orile-Iganmu, Surulere, Lagos State                                                   | Surulere     | Lagos |
| 5165 | LA/1693 | LA/1693/S/4  | Lanyard Pharmacy                             |  | 86, Ago Palace way, By Century B/Stop, Okota Isolo, Lagos State                                        | Apapa        | Lagos |
| 5166 | LA/1694 | LA/1694/S/15 | Maxi Specialist Eye Clinic& Optical Services |  | 113, Allen Avenue, Ikeja, Lagos State                                                                  | Oshodi/Isolo | Lagos |
| 5167 | LA/1697 | LA/1697/S/5  | Mayflower Clinics                            |  | 1, Ibari Str, Ifako, Agege, Lagos, Lagos State                                                         | Alimosho     | Lagos |

|      |         |              |                                                         |  |                                                                                               |                  |       |
|------|---------|--------------|---------------------------------------------------------|--|-----------------------------------------------------------------------------------------------|------------------|-------|
| 5168 | LA/1697 | LA/1697/S/1  | Mayflower Clinics                                       |  | 1, Ibari Str, Ifako, Agege, Lagos, Lagos State                                                | Alimosho         | Lagos |
| 5169 | LA/1698 | LA/1698/S/4  | Foundation Pharmacy                                     |  | 23, Emmanuel Street, Off Jagunmolu Street, Bariga, Lagos.                                     | Somolu           | Lagos |
| 5170 | LA/1700 | LA/1700/S/4  | Lumaco Pharmaceuticals Limited                          |  | 1, Toyan Street, Obalende, Lagos                                                              | Lagos Island     | Lagos |
| 5171 | LA/1701 | LA/1701/S/13 | Raye Eye Clinic                                         |  | 59, Olatilewa Street, Off Ogunlana drive, Surulere, Lagos                                     | Surulere         | Lagos |
| 5172 | LA/1702 | LA/1702/S/4  | Pharmacare Support Services                             |  | 51 Road, Opposite NITEL Gate, Festac Town, Lagos.                                             | Amuwo-Odofin     | Lagos |
| 5173 | LA/1703 | LA/1703/S/4  | Pharmacare Support Services                             |  | 29, Community Road, Satellite Town, Lagos                                                     | Amuwo-Odofin     | Lagos |
| 5174 | LA/1708 | LA/1708/S/4  | Anynta Pharm(Nig) Ltd                                   |  | 10, Kasumu Street, Shangisha- Ketu, Lagos                                                     | Kosofe           | Lagos |
| 5175 | LA/1709 | LA/1709/S/5  | Waxlab Medical Diagnostic Centre                        |  | 2, Isiaka Olufemi Street, Off LASU- Isheri Road, Olorufemi Bus Stop, Lagos                    | Alimosho         | Lagos |
| 5176 | LA/1710 | LA/1710/S/4  | Unilag Community Pharmacy                               |  | UNILAG main Campus, Lagos.                                                                    | Lagos Mainland   | Lagos |
| 5177 | LA/1712 | LA/1712/S/5  | Prestige Diagnostic Centre                              |  | 194,Ojo-Igbede Road, Ajangbadi, Ilemba-Hausa, Ojo, Lagos State                                | Ojo              | Lagos |
| 5178 | LA/1713 | LA/1713/S/15 | Radiant Optics                                          |  | Plot 307, WoolWorths Plaza, Adeola Odeku, Victoria Island, Lagos                              | Eti-Osa          | Lagos |
| 5179 | LA/1716 | LA/1716/S/1  | The Lister Medical centre                               |  | 106, Obunta Avenue, Off Ajao Road, off Adeniyi Jones, Ikeja, Lagos State                      | Ikeja            | Lagos |
| 5180 | LA/1717 | LA/1717/S/4  | Caratayah Pharmacy And Stores.                          |  | 90, Dopemu Road, Alhaji Shifau Bus Stop, Agege Lagos State                                    | Agege            | Lagos |
| 5181 | LA/1719 | LA/1719/S/11 | Blooming care Hospital                                  |  | 30. Baale Animashahun Road Alakuko.                                                           | Ifako-Ijaye      | Lagos |
| 5182 | LA/1719 | LA/1719/S/3  | Blooming care Hospital                                  |  | 30. Baale Animashahun Road Alakuko.                                                           | Ifako-Ijaye      | Lagos |
| 5183 | LA/1719 | LA/1719/S/8  | Blooming care Hospital                                  |  | 30. Baale Animashahun Road Alakuko.                                                           | Ifako-Ijaye      | Lagos |
| 5184 | LA/1719 | LA/1719/S/5  | Blooming care Hospital                                  |  | 30. Baale Animashahun Road Alakuko.                                                           | Ifako-Ijaye      | Lagos |
| 5185 | LA/1720 | LA/1720/S/3  | Holy Family Hospital And Maternity Home, Satellite Town |  | 1, Ijegun Road, Satellite Town                                                                | Ojo              | Lagos |
| 5186 | LA/1722 | LA/1722/S/15 | Opti lens Eyecare                                       |  | 9, Olatunde Close, Off Falolu Road, Surulere, Lagos State                                     | Surulere         | Lagos |
| 5187 | LA/1724 | LA/1724/S/10 | Albina Mejeel Specialist Clinic                         |  | 13,Asani Akibon Street, Victory Estate,Iba Ojo Lagos State.                                   | Ojo              | Lagos |
| 5188 | LA/1727 | LA/1727/S/8  | Havilla Specialist Dental Clinic                        |  | 2, Oyedale Ogunniyi Street, Anthony Village, Lagos State                                      | Kosofe           | Lagos |
| 5189 | LA/1729 | LA/1729/S/15 | Hephzibah Eye Care                                      |  | 32 Admiralty Way, Opp. First Bank, Lekki Phase 1 Lagos State                                  | Eti-Osa          | Lagos |
| 5190 | LA/1730 | LA/1730/S/15 | Viewpoint Specialist Eye Centre                         |  | 118, Murtala Moh'd Way, Ebute Metta, Lagos State                                              | Lagos Mainland   | Lagos |
| 5191 | LA/1731 | LA/1731/S/6  | Outreach Women And Children Hospital                    |  | 4th Avenue By 3rd Avenue Junction, Festac Town Lagos State                                    | Amuwo-Odofin     | Lagos |
| 5192 | LA/1731 | LA/1731/S/3  | Outreach Women And Children Hospital                    |  | 4th Avenue By 3rd Avenue Junction, Festac Town Lagos State                                    | Amuwo-Odofin     | Lagos |
| 5193 | LA/1733 | LA/1733/S/4  | Sata Pharmacy                                           |  | 270, Agege Motor Road, Mushin, Lagos State                                                    | Mushin           | Lagos |
| 5194 | LA/1736 | LA/1736/S/2  | Cardiac And Renal Center                                |  | No. 1, Hospital Rd. Within Gbagada General Hospital, Lagos State.                             | Kosofe           | Lagos |
| 5195 | LA/1737 | LA/1737/S/4  | Chestra Pharmacy And Stores LTD                         |  | No. 1, Solomon Oroale Street, Itedo Village, Lekki Phase 1, Lagos State.                      | Eti-Osa          | Lagos |
| 5196 | LA/1738 | LA/1738/S/8  | Toothcom Dental Clinic                                  |  | Plot 3012/No 14, Rafiu Babatunde Tinubu Rd. Amuwo Odofin, Lagos State                         | Amuwo-Odofin     | Lagos |
| 5197 | LA/1739 | LA/1739/S/2  | Ostard Specialist Hospital                              |  | 161, Idewu Street, Olodi Apapa, Lagos State                                                   | Ajeromi/Ifelodun | Lagos |
| 5198 | LA/1741 | LA/1741/S/8  | Peve Dental Clinic                                      |  | Block B, Suite 36, Primal Tek Shopping Plaza, Opp. Iju Garage, Pen Cinema, Agege, Lagos State | Ifako-Ijaye      | Lagos |
| 5199 | LA/1742 | LA/1742/S/13 | Vision Plus Specialist Eye Clinic                       |  | 24,Allen Avenue, Ikeja, Lagos State                                                           | Ikeja            | Lagos |

|      |         |              |                                       |  |                                                                                                         |                  |       |
|------|---------|--------------|---------------------------------------|--|---------------------------------------------------------------------------------------------------------|------------------|-------|
| 5200 | LA/1755 | LA/1755/S/3  | Peterhoff Specialist Hospital         |  | 4, Ganiyu Osebaby Street, Off Dr. Fasheun Avenue, Ago, Lagos State.                                     | Oshodi/Isolo     | Lagos |
| 5201 | LA/1755 | LA/1755/S/1  | Peterhoff Specialist Hospital         |  | 4, Ganiyu Osebaby Street, Off Dr. Fasheun Avenue, Ago, Lagos State.                                     | Oshodi/Isolo     | Lagos |
| 5202 | LA/1759 | LA/1759/S/3  | Louise Med Hospital Limited           |  | Plot 14, Blk. 95, Omorinre Johnson Street, Lekki Phase 1, Lagos State                                   | Eti-Osa          | Lagos |
| 5203 | LA/1759 | LA/1759/S/6  | Louise Med Hospital Limited           |  | Plot 14, Blk. 95, Omorinre Johnson Street, Lekki Phase 1, Lagos State                                   | Eti-Osa          | Lagos |
| 5204 | LA/1759 | LA/1759/S/1  | Louise Med Hospital Limited           |  | Plot 14, Blk. 95, Omorinre Johnson Street, Lekki Phase 1, Lagos State                                   | Eti-Osa          | Lagos |
| 5205 | LA/1760 | LA/1760/S/5  | Riverside Diagnostic Hospital Limited |  | Plot 1397e Block 63a, Shalom Road, Off Raji Rasaki Road, Near Apple Junction, Amuwo Odofin, Lagos State | Amuwo-Odofin     | Lagos |
| 5206 | LA/1765 | LA/1765/S/7  | Foundation Medical Laboratory         |  | No. 38, Enitan Street, Aguda, Surulere, Lagos State                                                     | Surulere         | Lagos |
| 5207 | LA/1769 | LA/1769/S/10 | St. Julius Hospital                   |  | No. 17, Adekunbi Street, off Toyin Street, Ikeja, Lagos                                                 | Ikeja            | Lagos |
| 5208 | LA/1769 | LA/1769/S/3  | St. Julius Hospital                   |  | No. 17, Adekunbi Street, off Toyin Street, Ikeja, Lagos                                                 | Ikeja            | Lagos |
| 5209 | LA/1770 | LA/1770/S/8  | Dental Plus                           |  | Plot 286, Muri Okuola Street (Near Price Water House coopers) Victoria Island Lagos State.              | Eti-Osa          | Lagos |
| 5210 | LA/1775 | LA/1775/S/5  | NNPC Clinic                           |  | No. 1B, Muri Okunola Street, Lagos State                                                                | Eti-Osa          | Lagos |
| 5211 | LA/1775 | LA/1775/S/2  | NNPC Clinic                           |  | No. 1B, Muri Okunola Street, Lagos State                                                                | Eti-Osa          | Lagos |
| 5212 | LA/1775 | LA/1775/S/1  | NNPC Clinic                           |  | No. 1B, Muri Okunola Street, Lagos State                                                                | Eti-Osa          | Lagos |
| 5213 | LA/1775 | LA/1775/S/4  | NNPC Clinic                           |  | No. 1B, Muri Okunola Street, Lagos State                                                                | Eti-Osa          | Lagos |
| 5214 | LA/1775 | LA/1775/S/7  | NNPC Clinic                           |  | No. 1B, Muri Okunola Street, Lagos State                                                                | Eti-Osa          | Lagos |
| 5215 | LA/1775 | LA/1775/S/12 | NNPC Clinic                           |  | No. 1B, Muri Okunola Street, Lagos State                                                                | Eti-Osa          | Lagos |
| 5216 | LA/1775 | LA/1775/S/15 | NNPC Clinic                           |  | No. 1B, Muri Okunola Street, Lagos State                                                                | Eti-Osa          | Lagos |
| 5217 | LA/1775 | LA/1775/S/11 | NNPC Clinic                           |  | No. 1B, Muri Okunola Street, Lagos State                                                                | Eti-Osa          | Lagos |
| 5218 | LA/1775 | LA/1775/S/10 | NNPC Clinic                           |  | No. 1B, Muri Okunola Street, Lagos State                                                                | Eti-Osa          | Lagos |
| 5219 | LA/1778 | LA/1778/S/15 | Ocuville Eye Centre                   |  | 95, Ogudu Road, Ojota, Lagos State                                                                      | Kosofe           | Lagos |
| 5220 | LA/1779 | LA/1779/S/13 | Sightcity Eye Clinic                  |  | FMDA Building Plot 1398D, Tiamiyu Savage Street, Victoria Island Lagos State                            | Eti-Osa          | Lagos |
| 5221 | LA/1788 | LA/1788/S/3  | Kingswill Specialist Hospital         |  | 3, Ayinuola Close/18b Rafiu Babatunde Road, By Apple Junction Amuwo- Odofin Lagos State                 | Amuwo-Odofin     | Lagos |
| 5222 | LA/1788 | LA/1788/S/1  | Kingswill Specialist Hospital         |  | 3, Ayinuola Close/18b Rafiu Babatunde Road, By Apple Junction Amuwo- Odofin Lagos State                 | Amuwo-Odofin     | Lagos |
| 5223 | LA/1794 | LA/1794/S/3  | Bee Hess Hospital                     |  | 155, Akowonjo Road, Akowonjo , Lagos State                                                              | Alimosho         | Lagos |
| 5224 | LA/1794 | LA/1794/S/2  | Bee Hess Hospital                     |  | 155, Akowonjo Road, Akowonjo , Lagos State                                                              | Alimosho         | Lagos |
| 5225 | LA/1794 | LA/1794/S/6  | Bee Hess Hospital                     |  | 155, Akowonjo Road, Akowonjo , Lagos State                                                              | Alimosho         | Lagos |
| 5226 | LA/1795 | LA/1795/S/8  | Building Smiles Dental Clinic         |  | 70, Opebi Rd. Ikeja, Lagos State                                                                        | Ikeja            | Lagos |
| 5227 | LA/1798 | LA/1798/S/5  | Mifam Medical Laboratory Services     |  | Mifam Medical Laboratory Services                                                                       | Ajeromi/Ifelodun | Lagos |
| 5228 | LA/1803 | LA/1803/S/1  | Mercy Stripes Specialist Hospital     |  | 30, Philip Taiwo Street, Coker Estate, Orisunbare, Shasha Lagos Lagos State                             | Alimosho         | Lagos |
| 5229 | LA/1803 | LA/1803/S/6  | Mercy Stripes Specialist Hospital     |  | 30, Philip Taiwo Street, Coker Estate, Orisunbare, Shasha Lagos Lagos State                             | Alimosho         | Lagos |

|      |         |              |                                                 |   |                                                                                        |                |       |
|------|---------|--------------|-------------------------------------------------|---|----------------------------------------------------------------------------------------|----------------|-------|
| 5230 | LA/1803 | LA/1803/S/3  | Mercy Stripes Specialist Hospital               |   | 30, Philip Taiwo Street, Coker Estate, Orisunbare, Shasha Lagos Lagos State            | Alimosho       | Lagos |
| 5231 | LA/1803 | LA/1803/S/2  | Mercy Stripes Specialist Hospital               |   | 30, Philip Taiwo Street, Coker Estate, Orisunbare, Shasha Lagos Lagos State            | Alimosho       | Lagos |
| 5232 | LA/1804 | LA/1804/S/13 | Meb Eye Clinic (Eye Clinic & Optical Services)  |   | 1, Charity Road, Abule-Egba, Lagos. Lagos State                                        | Ifako-Ijaye    | Lagos |
| 5233 | LA/1813 | LA/1813/S/1  | Macedonia Specialist Hospital                   |   | 28,Ijaiye Road, Ogba                                                                   | Ifako-Ijaye    | Lagos |
| 5234 | LA/1813 | LA/1813/S/3  | Macedonia Specialist Hospital                   |   | 28,Ijaiye Road, Ogba                                                                   | Ifako-Ijaye    | Lagos |
| 5235 | LA/1814 | LA/1814/S/4  | Epsilon Pharmacy Ltd                            |   | Shop 4/5,Kanyinsola Plaza, Shagari Estate, Ipaja Lagos State                           | Alimosho       | Lagos |
| 5236 | LA/1815 | LA/1815/S/4  | Hess Tee Pharmacy                               |   | 8,Ifofosi Road, Iyana Ejigbo Lagos State                                               | Oshodi/Isolo   | Lagos |
| 5237 | LA/1817 | LA/1817/S/7  | Promise Diagnostics                             |   | 132, Dopemu Road, Dopemu-Agege, Lagos, Lagos State                                     | Agege          | Lagos |
| 5238 | LA/1817 | LA/1817/S/14 | Promise Diagnostics                             |   | 132, Dopemu Road, Dopemu-Agege, Lagos, Lagos State                                     | Agege          | Lagos |
| 5239 | LA/1819 | LA/1819/S/13 | Mega Vision Limited                             |   | 15, Allen Avenue, Ikeja, Lagos State                                                   | Ikeja          | Lagos |
| 5240 | LA/1820 | LA/1820/S/8  | Platinum Dental Surgery                         |   | 106, Aladelola Street, Ikosi Ketu, Lagos, Lagos State                                  | Kosofe         | Lagos |
| 5241 | LA/1822 | LA/1822/S/5  | Our Lady and St. Francis Catholic Hospital      |   | Along Super Flamingo Street, Toga-Zanmu Village, Lagos/Badagry Expressway, Lagos State | Badagry        | Lagos |
| 5242 | LA/1823 | LA/1823/S/15 | Mami Eye Clinic                                 |   | 38, Olowu Street, Ikeja, Lagos Street                                                  | Ikeja          | Lagos |
| 5243 | LA/1824 | LA/1824/S/13 | New Look Eye Clinic & Optical Services Ltd      |   | 1, Idimu Road, Ikotun, Lagos, Lagos State                                              | Alimosho       | Lagos |
| 5244 | LA/1825 | LA/1825/S/15 | Precious Eye Hospital Ltd                       |   | 1 Saluwala Kadiku Street, Happyland Estate, Lekki-Epe Expressway, Lagos State          | Eti-Osa        | Lagos |
| 5245 | LA/1827 | LA/1827/S/13 | Procare Vision                                  |   | 68, Queen Street, Yaba, Lagos, Lagos State                                             | Lagos Mainland | Lagos |
| 5246 | LA/1833 | LA/1833/S/13 | Vision home Eyecare                             |   | 29, Opebi Road, Ikeja, Lagos State                                                     | Ikeja          | Lagos |
| 5247 | LA/1837 | LA/1837/S/3  | IFPF Hospital                                   |   | 374, Ikorodu Road, Maryland, Lagos State                                               | Kosofe         | Lagos |
| 5248 | LA/1838 | LA/1838/S/5  | Diagnostic Palace                               |   | Elesho B/Stop, Iyanaera, Off Lagos-Badagry Expressway, Ijanikin, Lagos State           | Ojo            | Lagos |
| 5249 | LA/1839 | LA/1839/S/5  | St. Edward Specialist Hospital & Cardiac Centre |   | 4, Dolapo Oshonaiké Street Off Ado Road, Ajah, Lekki, Lagos State                      | Eti-Osa        | Lagos |
| 5250 | LA/1841 | LA/1841/S/13 | Eaglesyte Opticals                              |   | 33, Karimu Street, Itire Road, Surulere, Lagos State                                   | Surulere       | Lagos |
| 5251 | LA/1843 | LA/1843/S/13 | Standard Optical Limited                        |   | 1b, Point Road, Polysonic Mall, Apapa, Lagos State                                     | Apapa          | Lagos |
| 5252 | LA/1844 | LA/1844/S/13 | Standard Optical Limited                        |   | 1b, Point Road, Polysonic Mall, Apapa, Lagos State                                     | Apapa          | Lagos |
| 5253 | NG/0002 | NG/0002/S/5  | General Hospital, Agaie                         | - | Agaie, Minna                                                                           | Agaie          | Niger |
| 5254 | NG/0002 | NG/0002/S/1  | General Hospital, Agaie                         | - | Agaie, Minna                                                                           | Agaie          | Niger |
| 5255 | NG/0002 | NG/0002/S/6  | General Hospital, Agaie                         | - | Agaie, Minna                                                                           | Agaie          | Niger |
| 5256 | NG/0002 | NG/0002/S/4  | General Hospital, Agaie                         | - | Agaie, Minna                                                                           | Agaie          | Niger |
| 5257 | NG/0002 | NG/0002/S/2  | General Hospital, Agaie                         | - | Agaie, Minna                                                                           | Agaie          | Niger |
| 5258 | NG/0003 | NG/0003/S/7  | Federal Medical Centre, Bida                    |   | Bida.                                                                                  | Bida           | Niger |
| 5259 | NG/0003 | NG/0003/S/6  | Federal Medical Centre, Bida                    |   | Bida.                                                                                  | Bida           | Niger |
| 5260 | NG/0003 | NG/0003/S/11 | Federal Medical Centre, Bida                    |   | Bida.                                                                                  | Bida           | Niger |
| 5261 | NG/0003 | NG/0003/S/4  | Federal Medical Centre, Bida                    |   | Bida.                                                                                  | Bida           | Niger |
| 5262 | NG/0003 | NG/0003/S/8  | Federal Medical Centre, Bida                    |   | Bida.                                                                                  | Bida           | Niger |
| 5263 | NG/0003 | NG/0003/S/1  | Federal Medical Centre, Bida                    |   | Bida.                                                                                  | Bida           | Niger |
| 5264 | NG/0003 | NG/0003/S/3  | Federal Medical Centre, Bida                    |   | Bida.                                                                                  | Bida           | Niger |
| 5265 | NG/0003 | NG/0003/S/5  | Federal Medical Centre, Bida                    |   | Bida.                                                                                  | Bida           | Niger |

|      |         |              |                            |                                                                                                        |                                        |           |       |
|------|---------|--------------|----------------------------|--------------------------------------------------------------------------------------------------------|----------------------------------------|-----------|-------|
| 5266 | NG/0009 | NG/0009/S/4  | Fem-Universal Pharmacy     | Pharmacy                                                                                               | ABK House, BCC Road, Bida              | Bida      | Niger |
| 5267 | NG/0013 | NG/0013/S/1  | General Hosiptal, Minna.   |                                                                                                        | Hospital Road, Minna.                  | Chanchaga | Niger |
| 5268 | NG/0013 | NG/0013/S/3  | General Hosiptal, Minna.   |                                                                                                        | Hospital Road, Minna.                  | Chanchaga | Niger |
| 5269 | NG/0013 | NG/0013/S/7  | General Hosiptal, Minna.   |                                                                                                        | Hospital Road, Minna.                  | Chanchaga | Niger |
| 5270 | NG/0013 | NG/0013/S/8  | General Hosiptal, Minna.   |                                                                                                        | Hospital Road, Minna.                  | Chanchaga | Niger |
| 5271 | NG/0013 | NG/0013/S/12 | General Hosiptal, Minna.   |                                                                                                        | Hospital Road, Minna.                  | Chanchaga | Niger |
| 5272 | NG/0013 | NG/0013/S/5  | General Hosiptal, Minna.   |                                                                                                        | Hospital Road, Minna.                  | Chanchaga | Niger |
| 5273 | NG/0013 | NG/0013/S/6  | General Hosiptal, Minna.   |                                                                                                        | Hospital Road, Minna.                  | Chanchaga | Niger |
| 5274 | NG/0013 | NG/0013/S/15 | General Hosiptal, Minna.   |                                                                                                        | Hospital Road, Minna.                  | Chanchaga | Niger |
| 5275 | NG/0013 | NG/0013/S/4  | General Hosiptal, Minna.   |                                                                                                        | Hospital Road, Minna.                  | Chanchaga | Niger |
| 5276 | NG/0014 | NG/0014/S/11 | IBB Specialist Hospital    |                                                                                                        | Biko Road, Chanchangi, Minna           | Chanchaga | Niger |
| 5277 | NG/0014 | NG/0014/S/7  | IBB Specialist Hospital    |                                                                                                        | Biko Road, Chanchangi, Minna           | Chanchaga | Niger |
| 5278 | NG/0014 | NG/0014/S/4  | IBB Specialist Hospital    |                                                                                                        | Biko Road, Chanchangi, Minna           | Chanchaga | Niger |
| 5279 | NG/0014 | NG/0014/S/5  | IBB Specialist Hospital    |                                                                                                        | Biko Road, Chanchangi, Minna           | Chanchaga | Niger |
| 5280 | NG/0014 | NG/0014/S/10 | IBB Specialist Hospital    |                                                                                                        | Biko Road, Chanchangi, Minna           | Chanchaga | Niger |
| 5281 | NG/0014 | NG/0014/S/12 | IBB Specialist Hospital    |                                                                                                        | Biko Road, Chanchangi, Minna           | Chanchaga | Niger |
| 5282 | NG/0014 | NG/0014/S/1  | IBB Specialist Hospital    |                                                                                                        | Biko Road, Chanchangi, Minna           | Chanchaga | Niger |
| 5283 | NG/0014 | NG/0014/S/3  | IBB Specialist Hospital    |                                                                                                        | Biko Road, Chanchangi, Minna           | Chanchaga | Niger |
| 5284 | NG/0016 | NG/0016/S/1  | Bay Specialist Hospital    |                                                                                                        | Plot 33, Bay Clinic Road, Tunga, Minna | Chanchaga | Niger |
| 5285 | NG/0017 | NG/0017/S/3  | Imani Specialist Hospital  |                                                                                                        | Minna.                                 | Chanchaga | Niger |
| 5286 | NG/0017 | NG/0017/S/14 | Imani Specialist Hospital  |                                                                                                        | Minna.                                 | Chanchaga | Niger |
| 5287 | NG/0017 | NG/0017/S/1  | Imani Specialist Hospital  |                                                                                                        | Minna.                                 | Chanchaga | Niger |
| 5288 | NG/0020 | NG/0020/S/1  | Standard Hospital          |                                                                                                        | Old Airport Quarters, Minna            | Chanchaga | Niger |
| 5289 | NG/0020 | NG/0020/S/7  | Standard Hospital          |                                                                                                        | Old Airport Quarters, Minna            | Chanchaga | Niger |
| 5290 | NG/0020 | NG/0020/S/3  | Standard Hospital          |                                                                                                        | Old Airport Quarters, Minna            | Chanchaga | Niger |
| 5291 | NG/0020 | NG/0020/S/5  | Standard Hospital          |                                                                                                        | Old Airport Quarters, Minna            | Chanchaga | Niger |
| 5292 | NG/0022 | NG/0022/S/7  | Alheri Specialist Hospital |                                                                                                        | Minna                                  | Chanchaga | Niger |
| 5293 | NG/0024 | NG/0024/S/2  | General Hospital, Mokwa    |                                                                                                        | Mokwa                                  | Mokwa     | Niger |
| 5294 | NG/0024 | NG/0024/S/1  | General Hospital, Mokwa    |                                                                                                        | Mokwa                                  | Mokwa     | Niger |
| 5295 | NG/0024 | NG/0024/S/3  | General Hospital, Mokwa    |                                                                                                        | Mokwa                                  | Mokwa     | Niger |
| 5296 | NG/0024 | NG/0024/S/6  | General Hospital, Mokwa    |                                                                                                        | Mokwa                                  | Mokwa     | Niger |
| 5297 | NG/0024 | NG/0024/S/4  | General Hospital, Mokwa    |                                                                                                        | Mokwa                                  | Mokwa     | Niger |
| 5298 | NG/0024 | NG/0024/S/5  | General Hospital, Mokwa    |                                                                                                        | Mokwa                                  | Mokwa     | Niger |
| 5299 | NG/0027 | NG/0027/S/12 | General Hospital, Minna    | Gen. Medicine, Laboratory, Pharmacy, Dentistry, Radiology, O&G, Surgery, Paediatrics, ENT, Opthamology | Hospital Road, Minna                   | Chanchaga | Niger |
| 5300 | NG/0027 | NG/0027/S/6  | General Hospital, Minna    | Gen. Medicine, Laboratory, Pharmacy, Dentistry, Radiology, O&G, Surgery, Paediatrics, ENT, Opthamology | Hospital Road, Minna                   | Chanchaga | Niger |

|      |         |              |                                                     |                                                                                                                               |                                                                                                           |           |       |
|------|---------|--------------|-----------------------------------------------------|-------------------------------------------------------------------------------------------------------------------------------|-----------------------------------------------------------------------------------------------------------|-----------|-------|
| 5301 | NG/0027 | NG/0027/S/1  | General Hospital,<br>Minna                          | Gen. Medicine,<br>Laboratory,<br>Pharmacy,<br>Dentistry,<br>Radiology, O&G,<br>Surgery,<br>Paediatrics, ENT,<br>Ophthalmology | Hospital Road, Minna                                                                                      | Chanchaga | Niger |
| 5302 | NG/0027 | NG/0027/S/3  | General Hospital,<br>Minna                          | Gen. Medicine,<br>Laboratory,<br>Pharmacy,<br>Dentistry,<br>Radiology, O&G,<br>Surgery,<br>Paediatrics, ENT,<br>Ophthalmology | Hospital Road, Minna                                                                                      | Chanchaga | Niger |
| 5303 | NG/0027 | NG/0027/S/7  | General Hospital,<br>Minna                          | Gen. Medicine,<br>Laboratory,<br>Pharmacy,<br>Dentistry,<br>Radiology, O&G,<br>Surgery,<br>Paediatrics, ENT,<br>Ophthalmology | Hospital Road, Minna                                                                                      | Chanchaga | Niger |
| 5304 | NG/0027 | NG/0027/S/8  | General Hospital,<br>Minna                          | Gen. Medicine,<br>Laboratory,<br>Pharmacy,<br>Dentistry,<br>Radiology, O&G,<br>Surgery,<br>Paediatrics, ENT,<br>Ophthalmology | Hospital Road, Minna                                                                                      | Chanchaga | Niger |
| 5305 | NG/0027 | NG/0027/S/4  | General Hospital,<br>Minna                          | Gen. Medicine,<br>Laboratory,<br>Pharmacy,<br>Dentistry,<br>Radiology, O&G,<br>Surgery,<br>Paediatrics, ENT,<br>Ophthalmology | Hospital Road, Minna                                                                                      | Chanchaga | Niger |
| 5306 | NG/0027 | NG/0027/S/5  | General Hospital,<br>Minna                          | Gen. Medicine,<br>Laboratory,<br>Pharmacy,<br>Dentistry,<br>Radiology, O&G,<br>Surgery,<br>Paediatrics, ENT,<br>Ophthalmology | Hospital Road, Minna                                                                                      | Chanchaga | Niger |
| 5307 | NG/0027 | NG/0027/S/2  | General Hospital,<br>Minna                          | Gen. Medicine,<br>Laboratory,<br>Pharmacy,<br>Dentistry,<br>Radiology, O&G,<br>Surgery,<br>Paediatrics, ENT,<br>Ophthalmology | Hospital Road, Minna                                                                                      | Chanchaga | Niger |
| 5308 | NG/0027 | NG/0027/S/15 | General Hospital,<br>Minna                          | Gen. Medicine,<br>Laboratory,<br>Pharmacy,<br>Dentistry,<br>Radiology, O&G,<br>Surgery,<br>Paediatrics, ENT,<br>Ophthalmology | Hospital Road, Minna                                                                                      | Chanchaga | Niger |
| 5309 | NG/0028 | NG/0028/S/1  | Imani Specialist<br>Hospital & Diagnostic<br>Centre | O & G, Surgery,<br>Ultrasound.                                                                                                | Plot NGS 4989, Nnamdi<br>Azikiwe Way, Opp., Shiroro<br>Hotel Junction by NEPA Step<br>down Station, Minna | Chanchaga | Niger |
| 5310 | NG/0028 | NG/0028/S/3  | Imani Specialist<br>Hospital & Diagnostic<br>Centre | O & G, Surgery,<br>Ultrasound.                                                                                                | Plot NGS 4989, Nnamdi<br>Azikiwe Way, Opp., Shiroro<br>Hotel Junction by NEPA Step<br>down Station, Minna | Chanchaga | Niger |
| 5311 | NG/0028 | NG/0028/S/14 | Imani Specialist<br>Hospital & Diagnostic<br>Centre | O & G, Surgery,<br>Ultrasound.                                                                                                | Plot NGS 4989, Nnamdi<br>Azikiwe Way, Opp., Shiroro<br>Hotel Junction by NEPA Step<br>down Station, Minna | Chanchaga | Niger |
| 5312 | NG/0031 | NG/0031/S/4  | Zagbayi Pharmacy                                    | Pharmacy                                                                                                                      | 150Y Bosso Road, Behind<br>Habib Bank, Minna                                                              | Chanchaga | Niger |



|      |         |              |                                 |                      |                                                  |            |       |
|------|---------|--------------|---------------------------------|----------------------|--------------------------------------------------|------------|-------|
| 5313 | NG/0032 | NG/0032/S/4  | Nauzo Pharmacy Ltd              | Pharmacy             | NTD 36, Paiko Road, Tunga, Minna                 | Chanchaga  | Niger |
| 5314 | NG/0036 | NG/0036/S/4  | Na'uzo Pharmacy                 | Pharmacy             | Kuta Road, Minna                                 | Lavun      | Niger |
| 5315 | NG/0038 | NG/0038/S/4  | Femad Pharmacy & Stores         | Pharmacy             | Plot 35, Top Medical Road, Minna                 | Chanchaga  | Niger |
| 5316 | NG/0039 | NG/0039/S/4  | Farayola Pharm. Ltd.            | Pharmacy             | Opp. F.U.T. Bosso Road, Minna                    | Chanchaga  | Niger |
| 5317 | NG/0041 | NG/0041/S/4  | Sekkami Pharm. & Stores         | Pharmacy             | 72, Niteco Road, Minna                           | Chanchaga  | Niger |
| 5318 | NG/0042 | NG/0042/S/4  | Oxgate Pharm Ltd.               | Pharmacy             | 56, Yusuf Kolawole Road, Tunga, Minna            | Chanchaga  | Niger |
| 5319 | NG/0046 | NG/0046/S/4  | Shebab Pharmacy                 | Pharmacy             | Paiko Road, Chanchangi, Minna                    | Bosso      | Niger |
| 5320 | NG/0048 | NG/0048/S/6  | Goje Medical Centre             |                      | Kontangora                                       | Kontangora | Niger |
| 5321 | NG/0049 | NG/0049/S/7  | General Hospital, Kontangora    |                      | Kontangora                                       | Kontangora | Niger |
| 5322 | NG/0049 | NG/0049/S/8  | General Hospital, Kontangora    |                      | Kontangora                                       | Kontangora | Niger |
| 5323 | NG/0049 | NG/0049/S/2  | General Hospital, Kontangora    |                      | Kontangora                                       | Kontangora | Niger |
| 5324 | NG/0049 | NG/0049/S/6  | General Hospital, Kontangora    |                      | Kontangora                                       | Kontangora | Niger |
| 5325 | NG/0049 | NG/0049/S/4  | General Hospital, Kontangora    |                      | Kontangora                                       | Kontangora | Niger |
| 5326 | NG/0049 | NG/0049/S/5  | General Hospital, Kontangora    |                      | Kontangora                                       | Kontangora | Niger |
| 5327 | NG/0053 | NG/0053/S/1  | Rural Hospital, Lapai           |                      | Lapai                                            | Lapai      | Niger |
| 5328 | NG/0053 | NG/0053/S/2  | Rural Hospital, Lapai           |                      | Lapai                                            | Lapai      | Niger |
| 5329 | NG/0053 | NG/0053/S/3  | Rural Hospital, Lapai           |                      | Lapai                                            | Lapai      | Niger |
| 5330 | NG/0053 | NG/0053/S/6  | Rural Hospital, Lapai           |                      | Lapai                                            | Lapai      | Niger |
| 5331 | NG/0053 | NG/0053/S/4  | Rural Hospital, Lapai           |                      | Lapai                                            | Lapai      | Niger |
| 5332 | NG/0055 | NG/0055/S/4  | Hephizbah Pharmaceuticals       | Pharmacy             | 2, Halal Shopping Complex, Bida Road, Lapai      | Lapai      | Niger |
| 5333 | NG/0056 | NG/0056/S/5  | Rural Hospital, Kutigi          | Pharmacy, Laboratory | Kutigi, Minna                                    | Lapai      | Niger |
| 5334 | NG/0056 | NG/0056/S/4  | Rural Hospital, Kutigi          | Pharmacy, Laboratory | Kutigi, Minna                                    | Lapai      | Niger |
| 5335 | NG/0059 | NG/0059/S/5  | Base Medical Centre, Suleja     |                      | Suleiman Barau Road, Opp. Rimeview Hotel, Suleja | Suleja     | Niger |
| 5336 | NG/0060 | NG/0060/S/5  | Citizen Hospital                |                      | Suleja                                           | Suleja     | Niger |
| 5337 | NG/0061 | NG/0061/S/5  | Fary Group Clinic               |                      | 105, Suleiman Barau Road, Suleja                 | Suleja     | Niger |
| 5338 | NG/0062 | NG/0062/S/8  | General Hospital, Suleja        |                      | Suleja                                           | Suleja     | Niger |
| 5339 | NG/0062 | NG/0062/S/1  | General Hospital, Suleja        |                      | Suleja                                           | Suleja     | Niger |
| 5340 | NG/0062 | NG/0062/S/7  | General Hospital, Suleja        |                      | Suleja                                           | Suleja     | Niger |
| 5341 | NG/0062 | NG/0062/S/4  | General Hospital, Suleja        |                      | Suleja                                           | Suleja     | Niger |
| 5342 | NG/0062 | NG/0062/S/5  | General Hospital, Suleja        |                      | Suleja                                           | Suleja     | Niger |
| 5343 | NG/0062 | NG/0062/S/3  | General Hospital, Suleja        |                      | Suleja                                           | Suleja     | Niger |
| 5344 | NG/0062 | NG/0062/S/2  | General Hospital, Suleja        |                      | Suleja                                           | Suleja     | Niger |
| 5345 | NG/0062 | NG/0062/S/6  | General Hospital, Suleja        |                      | Suleja                                           | Suleja     | Niger |
| 5346 | NG/0062 | NG/0062/S/14 | General Hospital, Suleja        |                      | Suleja                                           | Suleja     | Niger |
| 5347 | NG/0064 | NG/0064/S/5  | Maraba Hospital - Suleija       |                      | Maganda, Off Suleiman, Barau Road                | Suleja     | Niger |
| 5348 | NG/0074 | NG/0074/S/4  | Dema Q. Pharmacy                | Pharmacy             | Shop 3 Besides Timbe Shed, Kwanba, Suleja        | Suleja     | Niger |
| 5349 | NG/0075 | NG/0075/S/4  | Bee Pee Pharmacy                | Pharmacy             | No.9, Suleja Road, Mandala                       | Suleja     | Niger |
| 5350 | NG/0076 | NG/0076/S/4  | Tsowa Pharmaceuticals           | Pharmacy             | 58A, Suleiman Barau Road, Suleja                 | Suleja     | Niger |
| 5351 | NG/0079 | NG/0079/S/4  | Dixions Med. Pharm. Ltd.        | Pharmacy             | Farins Ruwa, New 1st Bank, Minna Road, Suleja    | Suleja     | Niger |
| 5352 | NG/0080 | NG/0080/S/4  | Goben Pharm. & Gen. Enterprises | Pharmacy             | 62, Morocco Road                                 | Suleja     | Niger |
| 5353 | NG/0081 | NG/0081/S/3  | Rural Health Hospital, Wushishi |                      | Wushishi                                         | Wushishi   | Niger |
| 5354 | NG/0081 | NG/0081/S/4  | Rural Health Hospital, Wushishi |                      | Wushishi                                         | Wushishi   | Niger |
| 5355 | NG/0081 | NG/0081/S/6  | Rural Health Hospital, Wushishi |                      | Wushishi                                         | Wushishi   | Niger |
| 5356 | NG/0081 | NG/0081/S/1  | Rural Health Hospital, Wushishi |                      | Wushishi                                         | Wushishi   | Niger |
| 5357 | NG/0081 | NG/0081/S/5  | Rural Health Hospital, Wushishi |                      | Wushishi                                         | Wushishi   | Niger |
| 5358 | NG/0081 | NG/0081/S/2  | Rural Health Hospital, Wushishi |                      | Wushishi                                         | Wushishi   | Niger |
| 5359 | NG/0085 | NG/0085/S/3  | General Hospital, Kutigi        |                      | Kutigi                                           | Gbako      | Niger |
| 5360 | NG/0085 | NG/0085/S/2  | General Hospital, Kutigi        |                      | Kutigi                                           | Gbako      | Niger |

|      |         |             |                                            |                                               |                                                                |           |       |
|------|---------|-------------|--------------------------------------------|-----------------------------------------------|----------------------------------------------------------------|-----------|-------|
| 5361 | NG/0085 | NG/0085/S/1 | General Hospital,<br>Kutigi                |                                               | Kutigi                                                         | Gbako     | Niger |
| 5362 | NG/0086 | NG/0086/S/4 | General Hosiptal,<br>Tungan Magajia        |                                               | Tungan Magajia                                                 | Mariga    | Niger |
| 5363 | NG/0086 | NG/0086/S/1 | General Hosiptal,<br>Tungan Magajia        |                                               | Tungan Magajia                                                 | Mariga    | Niger |
| 5364 | NG/0086 | NG/0086/S/3 | General Hosiptal,<br>Tungan Magajia        |                                               | Tungan Magajia                                                 | Mariga    | Niger |
| 5365 | NG/0086 | NG/0086/S/2 | General Hosiptal,<br>Tungan Magajia        |                                               | Tungan Magajia                                                 | Mariga    | Niger |
| 5366 | NG/0087 | NG/0087/S/5 | Rural Hospital, Nasco<br>Road              |                                               | Nasco Road                                                     | Magama    | Niger |
| 5367 | NG/0087 | NG/0087/S/4 | Rural Hospital, Nasco<br>Road              |                                               | Nasco Road                                                     | Magama    | Niger |
| 5368 | NG/0088 | NG/0088/S/2 | General Hospital, New<br>Bussa             |                                               | New Bussa                                                      | Bosso     | Niger |
| 5369 | NG/0088 | NG/0088/S/1 | General Hospital, New<br>Bussa             |                                               | New Bussa                                                      | Bosso     | Niger |
| 5370 | NG/0088 | NG/0088/S/8 | General Hospital, New<br>Bussa             |                                               | New Bussa                                                      | Bosso     | Niger |
| 5371 | NG/0088 | NG/0088/S/4 | General Hospital, New<br>Bussa             |                                               | New Bussa                                                      | Bosso     | Niger |
| 5372 | NG/0088 | NG/0088/S/6 | General Hospital, New<br>Bussa             |                                               | New Bussa                                                      | Bosso     | Niger |
| 5373 | NG/0088 | NG/0088/S/5 | General Hospital, New<br>Bussa             |                                               | New Bussa                                                      | Bosso     | Niger |
| 5374 | NG/0088 | NG/0088/S/3 | General Hospital, New<br>Bussa             |                                               | New Bussa                                                      | Bosso     | Niger |
| 5375 | NG/0089 | NG/0089/S/5 | Rural Hospital                             | Pharmacy,<br>Laboratory                       | Nasco                                                          | Kontagora | Niger |
| 5376 | NG/0089 | NG/0089/S/4 | Rural Hospital                             | Pharmacy,<br>Laboratory                       | Nasco                                                          | Kontagora | Niger |
| 5377 | NG/0093 | NG/0093/S/3 | Top Medical Centre                         |                                               | Plot 4 Paiko Road, Tunga,<br>Minna, Niger State                | Chanchaga | Niger |
| 5378 | NG/0093 | NG/0093/S/2 | Top Medical Centre                         |                                               | Plot 4 Paiko Road, Tunga,<br>Minna, Niger State                | Chanchaga | Niger |
| 5379 | NG/0093 | NG/0093/S/5 | Top Medical Centre                         |                                               | Plot 4 Paiko Road, Tunga,<br>Minna, Niger State                | Chanchaga | Niger |
| 5380 | NG/0094 | NG/0094/S/4 | General Hospital,<br>Kagara                |                                               | Kagara, Niger State                                            | Gurara    | Niger |
| 5381 | NG/0094 | NG/0094/S/5 | General Hospital,<br>Kagara                |                                               | Kagara, Niger State                                            | Gurara    | Niger |
| 5382 | NG/0094 | NG/0094/S/2 | General Hospital,<br>Kagara                |                                               | Kagara, Niger State                                            | Gurara    | Niger |
| 5383 | NG/0094 | NG/0094/S/3 | General Hospital,<br>Kagara                |                                               | Kagara, Niger State                                            | Gurara    | Niger |
| 5384 | NG/0094 | NG/0094/S/6 | General Hospital,<br>Kagara                |                                               | Kagara, Niger State                                            | Gurara    | Niger |
| 5385 | NG/0094 | NG/0094/S/1 | General Hospital,<br>Kagara                |                                               | Kagara, Niger State                                            | Gurara    | Niger |
| 5386 | NG/0102 | NG/0102/S/6 | Wasiha Medical Centre                      |                                               | Plot 10B Off Niiteco Road,<br>Tunga, Minna                     | Chanchaga | Niger |
| 5387 | NG/0102 | NG/0102/S/5 | Wasiha Medical Centre                      |                                               | Plot 10B Off Niiteco Road,<br>Tunga, Minna                     | Chanchaga | Niger |
| 5388 | NG/0106 | NG/0106/S/5 | Masol Hospital &<br>Maternity              |                                               | Off Our Lady Of Fatima<br>Church, Niteco Road, Tunga,<br>Minna | Chanchaga | Niger |
| 5389 | NG/0107 | NG/0107/S/5 | Liberty Hospital                           |                                               | Opposite 1st Bank Plc,<br>Minna Road, Suleja                   | Suleja    | Niger |
| 5390 | NG/0107 | NG/0107/S/4 | Liberty Hospital                           |                                               | Opposite 1st Bank Plc,<br>Minna Road, Suleja                   | Suleja    | Niger |
| 5391 | NG/0112 | NG/0112/S/5 | Unis Medical<br>Laboratory                 | Laboratory                                    | 6 victory Rd Suleja                                            | Suleja    | Niger |
| 5392 | NG/0113 | NG/0113/S/5 | The Delight Hospital                       | Laboratory                                    | Plot 66, Suleiman Barrau Rd<br>Suleja                          | Suleja    | Niger |
| 5393 | NG/0115 | NG/0115/S/4 | Beriky Pharmacy                            | Pharmacy                                      | No 167 Minna Rd Shop 6 LG<br>Stores Suleja                     | Suleja    | Niger |
| 5394 | NG/0118 | NG/0118/S/4 | Newcity Gate<br>Pharmacy Ltd               | Pharmacy                                      | 2 Hassan Dallatu Rd Suleja                                     | Suleja    | Niger |
| 5395 | NG/0121 | NG/0121/S/1 | Yebosoko Hospital                          | Laboratory,<br>Paediatrics,<br>Surgery, O & G | Banitu Badagry Rd, Bida                                        | Bida      | Niger |
| 5396 | NG/0121 | NG/0121/S/3 | Yebosoko Hospital                          | Laboratory,<br>Paediatrics,<br>Surgery, O & G | Banitu Badagry Rd, Bida                                        | Bida      | Niger |
| 5397 | NG/0121 | NG/0121/S/6 | Yebosoko Hospital                          | Laboratory,<br>Paediatrics,<br>Surgery, O & G | Banitu Badagry Rd, Bida                                        | Bida      | Niger |
| 5398 | NG/0121 | NG/0121/S/5 | Yebosoko Hospital                          | Laboratory,<br>Paediatrics,<br>Surgery, O & G | Banitu Badagry Rd, Bida                                        | Bida      | Niger |
| 5399 | NG/0123 | NG/0123/S/5 | Maraba Hospital                            | Ophthalmology,<br>Laboratory                  | Suleiman Barau Rd NEPA<br>Office Suleja                        | Suleja    | Niger |
| 5400 | NG/0130 | NG/0130/S/7 | Federal Polytechnic<br>Bida Medical Centre |                                               | Bida, Niger State                                              | Bida      | Niger |
| 5401 | NG/0130 | NG/0130/S/4 | Federal Polytechnic<br>Bida Medical Centre |                                               | Bida, Niger State                                              | Bida      | Niger |
| 5402 | NG/0130 | NG/0130/S/5 | Federal Polytechnic<br>Bida Medical Centre |                                               | Bida, Niger State                                              | Bida      | Niger |

|      |         |              |                                   |                                                      |                                         |           |       |
|------|---------|--------------|-----------------------------------|------------------------------------------------------|-----------------------------------------|-----------|-------|
| 5403 | NG/0148 | NG/0148/S/4  | VEEIT PHARMACY                    | Pharmacy                                             | PLOT 55, PETER SAUKI ROAD, TUNGA, MINNA | Chanchaga | Niger |
| 5404 | NG/0151 | NG/0151/S/4  | AJIB PHARMACY                     | PHARM                                                | SW 78 IBO ROAD, MINNA                   | Chanchaga | Niger |
| 5405 | NG/0152 | NG/0152/S/4  | HEPHZIBAH PHARMACY                | Pharmacy                                             | KETERENAWARI ROAD, SW 440, MINNA        | Chanchaga | Niger |
| 5406 | NG/0156 | NG/0156/S/4  | Jem Dental Clinic                 | Dental Surgery                                       | 105 Suleiman Barau Road, Suleja         | Suleja    | Niger |
| 5407 | NG/0160 | NG/0160/S/2  | General Hospital, Kutigi          | O&G, General Surgery, Internal Medicine              | Lagos Road, Kutigi                      | Lavun     | Niger |
| 5408 | NG/0160 | NG/0160/S/1  | General Hospital, Kutigi          | O&G, General Surgery, Internal Medicine              | Lagos Road, Kutigi                      | Lavun     | Niger |
| 5409 | NG/0160 | NG/0160/S/3  | General Hospital, Kutigi          | O&G, General Surgery, Internal Medicine              | Lagos Road, Kutigi                      | Lavun     | Niger |
| 5410 | NG/0161 | NG/0161/S/4  | General Hospital, Bida            | Dentist Surgery, O&G, General Surgery, Pharmacy      | Minna Road, Bida                        | Bida      | Niger |
| 5411 | NG/0161 | NG/0161/S/1  | General Hospital, Bida            | Dentist Surgery, O&G, General Surgery, Pharmacy      | Minna Road, Bida                        | Bida      | Niger |
| 5412 | NG/0161 | NG/0161/S/8  | General Hospital, Bida            | Dentist Surgery, O&G, General Surgery, Pharmacy      | Minna Road, Bida                        | Bida      | Niger |
| 5413 | NG/0161 | NG/0161/S/3  | General Hospital, Bida            | Dentist Surgery, O&G, General Surgery, Pharmacy      | Minna Road, Bida                        | Bida      | Niger |
| 5414 | NG/0162 | NG/0162/S/4  | General Hospital, Tungan Magajiya | Pharmacy, O&G, Internal Medicine, General Surgery    | 2 Kontagora Road Tungan Magajiya        | Rijau     | Niger |
| 5415 | NG/0162 | NG/0162/S/1  | General Hospital, Tungan Magajiya | Pharmacy, O&G, Internal Medicine, General Surgery    | 2 Kontagora Road Tungan Magajiya        | Rijau     | Niger |
| 5416 | NG/0162 | NG/0162/S/2  | General Hospital, Tungan Magajiya | Pharmacy, O&G, Internal Medicine, General Surgery    | 2 Kontagora Road Tungan Magajiya        | Rijau     | Niger |
| 5417 | NG/0162 | NG/0162/S/3  | General Hospital, Tungan Magajiya | Pharmacy, O&G, Internal Medicine, General Surgery    | 2 Kontagora Road Tungan Magajiya        | Rijau     | Niger |
| 5418 | NG/0163 | NG/0163/S/1  | Rural Hospital, Auna              | General Surgery, Paediatrics, O&G, Internal Medicine | Salka Road, Auna                        | Nasko     | Niger |
| 5419 | NG/0163 | NG/0163/S/3  | Rural Hospital, Auna              | General Surgery, Paediatrics, O&G, Internal Medicine | Salka Road, Auna                        | Nasko     | Niger |
| 5420 | NG/0163 | NG/0163/S/2  | Rural Hospital, Auna              | General Surgery, Paediatrics, O&G, Internal Medicine | Salka Road, Auna                        | Nasko     | Niger |
| 5421 | NG/0163 | NG/0163/S/6  | Rural Hospital, Auna              | General Surgery, Paediatrics, O&G, Internal Medicine | Salka Road, Auna                        | Nasko     | Niger |
| 5422 | NG/0164 | NG/0164/S/2  | Rural Hospital, Kuta              | Internal Medicine, Pharmacy, O&G                     | Gwada Road, Kuta                        | Shiroro   | Niger |
| 5423 | NG/0164 | NG/0164/S/4  | Rural Hospital, Kuta              | Internal Medicine, Pharmacy, O&G                     | Gwada Road, Kuta                        | Shiroro   | Niger |
| 5424 | NG/0164 | NG/0164/S/7  | Rural Hospital, Kuta              | Internal Medicine, Pharmacy, O&G                     | Gwada Road, Kuta                        | Shiroro   | Niger |
| 5425 | NG/0164 | NG/0164/S/3  | Rural Hospital, Kuta              | Internal Medicine, Pharmacy, O&G                     | Gwada Road, Kuta                        | Shiroro   | Niger |
| 5426 | NG/0166 | NG/0166/S/4  | General Hospital. Kafin-Koro      | Pharmacy, O&G                                        | Hospital Road, Kafin-Koro               | Paikoro   | Niger |
| 5427 | NG/0166 | NG/0166/S/3  | General Hospital. Kafin-Koro      | Pharmacy, O&G                                        | Hospital Road, Kafin-Koro               | Paikoro   | Niger |
| 5428 | NG/0168 | NG/0168/S/3  | General Hospital                  |                                                      | Hospital Road, Kafin-Koro               | Paikoro   | Niger |
| 5429 | NG/0168 | NG/0168/S/4  | General Hospital                  |                                                      | Hospital Road, Kafin-Koro               | Paikoro   | Niger |
| 5430 | NG/0255 | NG/0255/S/14 | Basic Health Clinic, Agwara       |                                                      | Agwara, Niger State                     | Agwara    | Niger |

|      |         |              |                                           |   |                                                              |           |          |
|------|---------|--------------|-------------------------------------------|---|--------------------------------------------------------------|-----------|----------|
| 5431 | NG/0255 | NG/0255/S/5  | Basic Health Clinic, Agwara               |   | Agwara, Niger State                                          | Agwara    | Niger    |
| 5432 | NG/0255 | NG/0255/S/6  | Basic Health Clinic, Agwara               |   | Agwara, Niger State                                          | Agwara    | Niger    |
| 5433 | NG/0255 | NG/0255/S/4  | Basic Health Clinic, Agwara               |   | Agwara, Niger State                                          | Agwara    | Niger    |
| 5434 | NG/0255 | NG/0255/S/1  | Basic Health Clinic, Agwara               |   | Agwara, Niger State                                          | Agwara    | Niger    |
| 5435 | NG/0255 | NG/0255/S/2  | Basic Health Clinic, Agwara               |   | Agwara, Niger State                                          | Agwara    | Niger    |
| 5436 | NG/0255 | NG/0255/S/3  | Basic Health Clinic, Agwara               |   | Agwara, Niger State                                          | Agwara    | Niger    |
| 5437 | NG/0257 | NG/0257/S/2  | New Bethel Hospital & Maternity           |   | Bosso Low Cost Senior Staff Qtrs                             | Bosso     | Niger    |
| 5438 | NG/0265 | NG/0265/S/5  | Abdulsalam Abubakar General Hospital      |   | Gulu, Niger State                                            | Lapai     | Niger    |
| 5439 | NG/0265 | NG/0265/S/4  | Abdulsalam Abubakar General Hospital      |   | Gulu, Niger State                                            | Lapai     | Niger    |
| 5440 | NG/0271 | NG/0271/S/5  | Umaru Musa Yar Adua Memorial Hospital     |   | Abuja-Kaduna Road, Sabon Wuse, Niger State                   | Tafa      | Niger    |
| 5441 | NG/0271 | NG/0271/S/4  | Umaru Musa Yar Adua Memorial Hospital     |   | Abuja-Kaduna Road, Sabon Wuse, Niger State                   | Tafa      | Niger    |
| 5442 | NG/0271 | NG/0271/S/1  | Umaru Musa Yar Adua Memorial Hospital     |   | Abuja-Kaduna Road, Sabon Wuse, Niger State                   | Tafa      | Niger    |
| 5443 | NG/0271 | NG/0271/S/7  | Umaru Musa Yar Adua Memorial Hospital     |   | Abuja-Kaduna Road, Sabon Wuse, Niger State                   | Tafa      | Niger    |
| 5444 | NG/0271 | NG/0271/S/8  | Umaru Musa Yar Adua Memorial Hospital     |   | Abuja-Kaduna Road, Sabon Wuse, Niger State                   | Tafa      | Niger    |
| 5445 | NG/0272 | NG/0272/S/5  | Bazza Jasim Clinic                        |   |                                                              | Chanchaga | Niger    |
| 5446 | NG/0272 | NG/0272/S/4  | Bazza Jasim Clinic                        |   |                                                              | Chanchaga | Niger    |
| 5447 | NG/0272 | NG/0272/S/3  | Bazza Jasim Clinic                        |   |                                                              | Chanchaga | Niger    |
| 5448 | NG/0276 | NG/0276/S/8  | Kizito Dental Clinic                      |   | 74 Morocco Road, Suleja, Niger State                         | Suleja    | Niger    |
| 5449 | NG/0279 | NG/0279/S/5  | Zuma Total Care Hospital                  |   | Suleja, Niger State                                          | Suleja    | Niger    |
| 5450 | NG/0279 | NG/0279/S/13 | Zuma Total Care Hospital                  |   | Suleja, Niger State                                          | Suleja    | Niger    |
| 5451 | NG/0279 | NG/0279/S/4  | Zuma Total Care Hospital                  |   | Suleja, Niger State                                          | Suleja    | Niger    |
| 5452 | NG/0279 | NG/0279/S/7  | Zuma Total Care Hospital                  |   | Suleja, Niger State                                          | Suleja    | Niger    |
| 5453 | NG/0280 | NG/0280/S/14 | Diadem Medical & Ultra Diagnostic Limited |   | Behind Eco bank Plc, Minna Road, Suleja, Niger State.        | Suleja    | Niger    |
| 5454 | NG/0283 | NG/0283/S/1  | Berith Specialist Hospital                |   | Plot 16087, Minna Road, Kwamba Layout, Suleja, Niger State.  | Suleja    | Niger    |
| 5455 | NG/0283 | NG/0283/S/5  | Berith Specialist Hospital                |   | Plot 16087, Minna Road, Kwamba Layout, Suleja, Niger State.  | Suleja    | Niger    |
| 5456 | NG/0283 | NG/0283/S/8  | Berith Specialist Hospital                |   | Plot 16087, Minna Road, Kwamba Layout, Suleja, Niger State.  | Suleja    | Niger    |
| 5457 | NG/0283 | NG/0283/S/3  | Berith Specialist Hospital                |   | Plot 16087, Minna Road, Kwamba Layout, Suleja, Niger State.  | Suleja    | Niger    |
| 5458 | NG/0283 | NG/0283/S/2  | Berith Specialist Hospital                |   | Plot 16087, Minna Road, Kwamba Layout, Suleja, Niger State.  | Suleja    | Niger    |
| 5459 | NG/0283 | NG/0283/S/7  | Berith Specialist Hospital                |   | Plot 16087, Minna Road, Kwamba Layout, Suleja, Niger State.  | Suleja    | Niger    |
| 5460 | NG/0283 | NG/0283/S/6  | Berith Specialist Hospital                |   | Plot 16087, Minna Road, Kwamba Layout, Suleja, Niger State.  | Suleja    | Niger    |
| 5461 | NG/0283 | NG/0283/S/4  | Berith Specialist Hospital                |   | Plot 16087, Minna Road, Kwamba Layout, Suleja, Niger State.  | Suleja    | Niger    |
| 5462 | NG/0285 | NG/0285/S/8  | Chelle Dental Clinic                      |   | No. 10811, Nulge Shopping Complex, Tunga, Minna, Niger State | Chanchaga | Niger    |
| 5463 | NG/0286 | NG/0286/S/7  | Optima Scan Services Limited.             |   | By 7up Depot Shiroro Road, Minna Niger State.                | Chanchaga | Niger    |
| 5464 | NG/0286 | NG/0286/S/5  | Optima Scan Services Limited.             |   | By 7up Depot Shiroro Road, Minna Niger State.                | Chanchaga | Niger    |
| 5465 | NW/0001 | NW/0001/S/7  | May Day Specialist Hospital & Maternity   | - | Esu Karu Road, opp Skye Bank Mararaba                        | Karu      | Nasarawa |
| 5466 | NW/0001 | NW/0001/S/4  | May Day Specialist Hospital & Maternity   | - | Esu Karu Road, opp Skye Bank Mararaba                        | Karu      | Nasarawa |

|      |         |              |                                         |                                                                                                                                      |                                       |       |          |
|------|---------|--------------|-----------------------------------------|--------------------------------------------------------------------------------------------------------------------------------------|---------------------------------------|-------|----------|
| 5467 | NW/0001 | NW/0001/S/3  | May Day Specialist Hospital & Maternity | -                                                                                                                                    | Esu Karu Road, opp Skye Bank Mararaba | Karu  | Nasarawa |
| 5468 | NW/0001 | NW/0001/S/2  | May Day Specialist Hospital & Maternity | -                                                                                                                                    | Esu Karu Road, opp Skye Bank Mararaba | Karu  | Nasarawa |
| 5469 | NW/0001 | NW/0001/S/1  | May Day Specialist Hospital & Maternity | -                                                                                                                                    | Esu Karu Road, opp Skye Bank Mararaba | Karu  | Nasarawa |
| 5470 | NW/0001 | NW/0001/S/5  | May Day Specialist Hospital & Maternity | -                                                                                                                                    | Esu Karu Road, opp Skye Bank Mararaba | Karu  | Nasarawa |
| 5471 | NW/0001 | NW/0001/S/6  | May Day Specialist Hospital & Maternity | -                                                                                                                                    | Esu Karu Road, opp Skye Bank Mararaba | Karu  | Nasarawa |
| 5472 | NW/0003 | NW/0003/S/10 | Federal Medical Centre, keffi           | Radiology, Internal Med., Gen. Surgery, Paediatrics, O & G, Pharmacy, Laboratory, Dental, Ophthalmology, Orthalmology, Physiotherapy | Keffi                                 | Keffi | Nasarawa |
| 5473 | NW/0003 | NW/0003/S/3  | Federal Medical Centre, keffi           | Radiology, Internal Med., Gen. Surgery, Paediatrics, O & G, Pharmacy, Laboratory, Dental, Ophthalmology, Orthalmology, Physiotherapy | Keffi                                 | Keffi | Nasarawa |
| 5474 | NW/0003 | NW/0003/S/15 | Federal Medical Centre, keffi           | Radiology, Internal Med., Gen. Surgery, Paediatrics, O & G, Pharmacy, Laboratory, Dental, Ophthalmology, Orthalmology, Physiotherapy | Keffi                                 | Keffi | Nasarawa |
| 5475 | NW/0003 | NW/0003/S/8  | Federal Medical Centre, keffi           | Radiology, Internal Med., Gen. Surgery, Paediatrics, O & G, Pharmacy, Laboratory, Dental, Ophthalmology, Orthalmology, Physiotherapy | Keffi                                 | Keffi | Nasarawa |
| 5476 | NW/0003 | NW/0003/S/5  | Federal Medical Centre, keffi           | Radiology, Internal Med., Gen. Surgery, Paediatrics, O & G, Pharmacy, Laboratory, Dental, Ophthalmology, Orthalmology, Physiotherapy | Keffi                                 | Keffi | Nasarawa |
| 5477 | NW/0003 | NW/0003/S/2  | Federal Medical Centre, keffi           | Radiology, Internal Med., Gen. Surgery, Paediatrics, O & G, Pharmacy, Laboratory, Dental, Ophthalmology, Orthalmology, Physiotherapy | Keffi                                 | Keffi | Nasarawa |
| 5478 | NW/0003 | NW/0003/S/1  | Federal Medical Centre, keffi           | Radiology, Internal Med., Gen. Surgery, Paediatrics, O & G, Pharmacy, Laboratory, Dental, Ophthalmology, Orthalmology, Physiotherapy | Keffi                                 | Keffi | Nasarawa |

|      |         |              |                                    |                                                                                                                                      |                                             |                |          |
|------|---------|--------------|------------------------------------|--------------------------------------------------------------------------------------------------------------------------------------|---------------------------------------------|----------------|----------|
| 5479 | NW/0003 | NW/0003/S/4  | Federal Medical Centre, keffi      | Radiology, Internal Med., Gen. Surgery, Paediatrics, O & G, Pharmacy, Laboratory, Dental, Ophthalmology, Orthalmology, Physiotherapy | Keffi                                       | Keffi          | Nasarawa |
| 5480 | NW/0003 | NW/0003/S/11 | Federal Medical Centre, keffi      | Radiology, Internal Med., Gen. Surgery, Paediatrics, O & G, Pharmacy, Laboratory, Dental, Ophthalmology, Orthalmology, Physiotherapy | Keffi                                       | Keffi          | Nasarawa |
| 5481 | NW/0003 | NW/0003/S/6  | Federal Medical Centre, keffi      | Radiology, Internal Med., Gen. Surgery, Paediatrics, O & G, Pharmacy, Laboratory, Dental, Ophthalmology, Orthalmology, Physiotherapy | Keffi                                       | Keffi          | Nasarawa |
| 5482 | NW/0003 | NW/0003/S/7  | Federal Medical Centre, keffi      | Radiology, Internal Med., Gen. Surgery, Paediatrics, O & G, Pharmacy, Laboratory, Dental, Ophthalmology, Orthalmology, Physiotherapy | Keffi                                       | Keffi          | Nasarawa |
| 5483 | NW/0004 | NW/0004/S/4  | Adonai Hospital                    |                                                                                                                                      | 2, Adonai Close Off Old Karu Road, Mararaba | Karu           | Nasarawa |
| 5484 | NW/0004 | NW/0004/S/3  | Adonai Hospital                    |                                                                                                                                      | 2, Adonai Close Off Old Karu Road, Mararaba | Karu           | Nasarawa |
| 5485 | NW/0004 | NW/0004/S/1  | Adonai Hospital                    |                                                                                                                                      | 2, Adonai Close Off Old Karu Road, Mararaba | Karu           | Nasarawa |
| 5486 | NW/0004 | NW/0004/S/2  | Adonai Hospital                    |                                                                                                                                      | 2, Adonai Close Off Old Karu Road, Mararaba | Karu           | Nasarawa |
| 5487 | NW/0006 | NW/0006/S/4  | General Hospital, Keffi            |                                                                                                                                      | Keffi                                       | Keffi          | Nasarawa |
| 5488 | NW/0006 | NW/0006/S/5  | General Hospital, Keffi            |                                                                                                                                      | Keffi                                       | Keffi          | Nasarawa |
| 5489 | NW/0008 | NW/0008/S/5  | General Hospital, Uke              |                                                                                                                                      | Uke                                         | Karu           | Nasarawa |
| 5490 | NW/0008 | NW/0008/S/4  | General Hospital, Uke              |                                                                                                                                      | Uke                                         | Karu           | Nasarawa |
| 5491 | NW/0009 | NW/0009/S/1  | General Hospital, Akwanga          |                                                                                                                                      | Akwanga                                     | Akwanga        | Nasarawa |
| 5492 | NW/0009 | NW/0009/S/4  | General Hospital, Akwanga          |                                                                                                                                      | Akwanga                                     | Akwanga        | Nasarawa |
| 5493 | NW/0011 | NW/0011/S/5  | General Hospital, Nasarawa Eggon   |                                                                                                                                      | Nasarawa Eggon                              | Nasarawa Eggon | Nasarawa |
| 5494 | NW/0011 | NW/0011/S/4  | General Hospital, Nasarawa Eggon   |                                                                                                                                      | Nasarawa Eggon                              | Nasarawa Eggon | Nasarawa |
| 5495 | NW/0012 | NW/0012/S/5  | General Hospital, Keana            |                                                                                                                                      | Keana                                       | Keana          | Nasarawa |
| 5496 | NW/0013 | NW/0013/S/5  | General Hospital, Awe              | Pharmacy, Laboratory                                                                                                                 | Awe, Nasarawa State                         | Awe            | Nasarawa |
| 5497 | NW/0013 | NW/0013/S/4  | General Hospital, Awe              | Pharmacy, Laboratory                                                                                                                 | Awe, Nasarawa State                         | Awe            | Nasarawa |
| 5498 | NW/0014 | NW/0014/S/5  | General Hospital, Obi              |                                                                                                                                      | Obi, Nasarawa State                         | Obi            | Nasarawa |
| 5499 | NW/0014 | NW/0014/S/4  | General Hospital, Obi              |                                                                                                                                      | Obi, Nasarawa State                         | Obi            | Nasarawa |
| 5500 | NW/0015 | NW/0015/S/4  | General Hospital, Wamba            |                                                                                                                                      | Wamba, Nasarawa State                       | Wamba          | Nasarawa |
| 5501 | NW/0015 | NW/0015/S/5  | General Hospital, Wamba            |                                                                                                                                      | Wamba, Nasarawa State                       | Wamba          | Nasarawa |
| 5502 | NW/0016 | NW/0016/S/2  | Dalhatu Araf (Specialist Hospital) |                                                                                                                                      | Nasarawa                                    | Lafia          | Nasarawa |
| 5503 | NW/0016 | NW/0016/S/6  | Dalhatu Araf (Specialist Hospital) |                                                                                                                                      | Nasarawa                                    | Lafia          | Nasarawa |
| 5504 | NW/0016 | NW/0016/S/3  | Dalhatu Araf (Specialist Hospital) |                                                                                                                                      | Nasarawa                                    | Lafia          | Nasarawa |
| 5505 | NW/0016 | NW/0016/S/7  | Dalhatu Araf (Specialist Hospital) |                                                                                                                                      | Nasarawa                                    | Lafia          | Nasarawa |
| 5506 | NW/0016 | NW/0016/S/5  | Dalhatu Araf (Specialist Hospital) |                                                                                                                                      | Nasarawa                                    | Lafia          | Nasarawa |
| 5507 | NW/0016 | NW/0016/S/11 | Dalhatu Araf (Specialist Hospital) |                                                                                                                                      | Nasarawa                                    | Lafia          | Nasarawa |

|      |         |              |                                         |             |                                                                                      |          |          |
|------|---------|--------------|-----------------------------------------|-------------|--------------------------------------------------------------------------------------|----------|----------|
| 5508 | NW/0016 | NW/0016/S/1  | Dalhatu Araf (Specialist Hospital)      |             | Nasarawa                                                                             | Lafia    | Nasarawa |
| 5509 | NW/0016 | NW/0016/S/8  | Dalhatu Araf (Specialist Hospital)      |             | Nasarawa                                                                             | Lafia    | Nasarawa |
| 5510 | NW/0016 | NW/0016/S/15 | Dalhatu Araf (Specialist Hospital)      |             | Nasarawa                                                                             | Lafia    | Nasarawa |
| 5511 | NW/0016 | NW/0016/S/4  | Dalhatu Araf (Specialist Hospital)      |             | Nasarawa                                                                             | Lafia    | Nasarawa |
| 5512 | NW/0020 | NW/0020/S/5  | Sauki Hospital                          | Laboratory  | Shendam Road, Lafia                                                                  | Lafia    | Nasarawa |
| 5513 | NW/0030 | NW/0030/S/4  | Meblink Pharmacy                        | Pharmacy    | Sharp Corner, Shop 2, Mararaba                                                       | Karu     | Nasarawa |
| 5514 | NW/0032 | NW/0032/S/4  | A. Chuks Pharmacy                       | Pharmacy    | Keffi Road Beside Pico Aluminium Mararaba                                            | Karu     | Nasarawa |
| 5515 | NW/0033 | NW/0033/S/4  | Medical Ink Pharmacy                    | Pharmacy    | Sharp Corner, Shop 2, Mararaba                                                       | Karu     | Nasarawa |
| 5516 | NW/0034 | NW/0034/S/4  | Isaj Pharmacy, Chemist (Nig.) Ltd.      | Pharmacy    | No. 61 Umaru Makama Dogo Road, Nasarawa                                              | Nasarawa | Kano     |
| 5517 | NW/0036 | NW/0036/S/4  | Honey Darn Pharmacy                     | Pharmacy    | Jos Road, Lafia                                                                      | Lafia    | Nasarawa |
| 5518 | NW/0039 | NW/0039/S/1  | Multi Tex laboratory                    | Laboratory  | Mararaba Opp. Midland Plaza, Mararaba                                                | Karu     | Nasarawa |
| 5519 | NW/0040 | NW/0040/S/5  | El-Shaddai Medical Lab. Ltd.            | Laboratory  | Behind Meblink Pharmacy, Sharp Corner, B/Stop Mararaba                               | Karu     | Nasarawa |
| 5520 | NW/0041 | NW/0041/S/4  | Salem Pharmacy                          | Pharmacy    | Opp. Aso Rd., Mararaba, Gurku                                                        | Karu     | Nasarawa |
| 5521 | NW/0050 | NW/0050/S/3  | Nagari Allah Magani Clinic & Maternity  |             | Behind Chief Magistrate Court, Keffi.                                                | Keffi    | Nasarawa |
| 5522 | NW/0050 | NW/0050/S/4  | Nagari Allah Magani Clinic & Maternity  |             | Behind Chief Magistrate Court, Keffi.                                                | Keffi    | Nasarawa |
| 5523 | NW/0050 | NW/0050/S/7  | Nagari Allah Magani Clinic & Maternity  |             | Behind Chief Magistrate Court, Keffi.                                                | Keffi    | Nasarawa |
| 5524 | NW/0050 | NW/0050/S/1  | Nagari Allah Magani Clinic & Maternity  |             | Behind Chief Magistrate Court, Keffi.                                                | Keffi    | Nasarawa |
| 5525 | NW/0052 | NW/0052/S/6  | Maraba Guruku Medical Center            | Primary     | Mararaba Int. Mkt Mararaba                                                           | Karu     | Nasarawa |
| 5526 | NW/0052 | NW/0052/S/5  | Maraba Guruku Medical Center            | Primary     | Mararaba Int. Mkt Mararaba                                                           | Karu     | Nasarawa |
| 5527 | NW/0052 | NW/0052/S/2  | Maraba Guruku Medical Center            | Primary     | Mararaba Int. Mkt Mararaba                                                           | Karu     | Nasarawa |
| 5528 | NW/0052 | NW/0052/S/7  | Maraba Guruku Medical Center            | Primary     | Mararaba Int. Mkt Mararaba                                                           | Karu     | Nasarawa |
| 5529 | NW/0052 | NW/0052/S/3  | Maraba Guruku Medical Center            | Primary     | Mararaba Int. Mkt Mararaba                                                           | Karu     | Nasarawa |
| 5530 | NW/0052 | NW/0052/S/4  | Maraba Guruku Medical Center            | Primary     | Mararaba Int. Mkt Mararaba                                                           | Karu     | Nasarawa |
| 5531 | NW/0052 | NW/0052/S/1  | Maraba Guruku Medical Center            | Primary     | Mararaba Int. Mkt Mararaba                                                           | Karu     | Nasarawa |
| 5532 | NW/0060 | NW/0060/S/5  | Biomart Medical Laboratory              | Laboratory  | Along Expressy Bread/Deeper Life Church str Sharp Corner Maraba                      | Karu     | Nasarawa |
| 5533 | NW/0062 | NW/0062/S/4  | Celex-Collins Pharmacy                  | Pharmacy    | 5 Abubakar Burga Rd                                                                  | Keffi    | Nasarawa |
| 5534 | NW/0074 | NW/0074/S/4  | OUR LADY OF APOSTLES HOSPITAL           |             | OLA HOSPITAL, AKWANGA                                                                | Akwanga  | Nasarawa |
| 5535 | NW/0074 | NW/0074/S/1  | OUR LADY OF APOSTLES HOSPITAL           |             | OLA HOSPITAL, AKWANGA                                                                | Akwanga  | Nasarawa |
| 5536 | NW/0074 | NW/0074/S/5  | OUR LADY OF APOSTLES HOSPITAL           |             | OLA HOSPITAL, AKWANGA                                                                | Akwanga  | Nasarawa |
| 5537 | NW/0086 | NW/0086/S/5  | Innovative Biotech Ltd                  | Laboratory  | 1 Abdul Abubakar Street, GRA, Keffi                                                  | Keffi    | Nasarawa |
| 5538 | NW/0093 | NW/0093/S/4  | Nasarawa State University Health Centre |             | Keffi                                                                                | Keffi    | Nasarawa |
| 5539 | NW/0093 | NW/0093/S/5  | Nasarawa State University Health Centre |             | Keffi                                                                                | Keffi    | Nasarawa |
| 5540 | NW/0098 | NW/0098/S/5  | Livia Shammah Hospitals Limited         |             | Opp. MRS Filling Station, beside Zimara Int. School, Abuja-Keffi Exp, Road Mararaba. | Karu     | Nasarawa |
| 5541 | NW/0098 | NW/0098/S/13 | Livia Shammah Hospitals Limited         |             | Opp. MRS Filling Station, beside Zimara Int. School, Abuja-Keffi Exp, Road Mararaba. | Karu     | Nasarawa |
| 5542 | NW/0098 | NW/0098/S/8  | Livia Shammah Hospitals Limited         |             | Opp. MRS Filling Station, beside Zimara Int. School, Abuja-Keffi Exp, Road Mararaba. | Karu     | Nasarawa |
| 5543 | NW/0098 | NW/0098/S/3  | Livia Shammah Hospitals Limited         |             | Opp. MRS Filling Station, beside Zimara Int. School, Abuja-Keffi Exp, Road Mararaba. | Karu     | Nasarawa |
| 5544 | NW/0099 | NW/0099/S/3  | Shammah Clinics                         | Obs & Gynae | Off Criss Park Street, Mararaba, Nassarawa State                                     | Karu     | Nasarawa |
| 5545 | NW/0101 | NW/0101/S/4  | Lamb of God Pharmacy                    | Pharmacy    | 1 Shendam Road, Lafia                                                                | Lafia    | Nasarawa |

|      |         |              |                                     |  |                                                                    |             |          |
|------|---------|--------------|-------------------------------------|--|--------------------------------------------------------------------|-------------|----------|
| 5546 | NW/0107 | NW/0107/S/4  | General Hospital Doma               |  | Agbashi Road, Doma, Nasarawa State.                                | Doma        | Nasarawa |
| 5547 | NW/0107 | NW/0107/S/5  | General Hospital Doma               |  | Agbashi Road, Doma, Nasarawa State.                                | Doma        | Nasarawa |
| 5548 | NW/0108 | NW/0108/S/4  | God is able Pharmacy                |  | Km 20, Abuja-Keffi Road, Masaka U-turn, Karu, Nasarawa State       | Karu        | Nasarawa |
| 5549 | NW/0119 | NW/0119/S/3  | Edither Choice Hospital             |  | 1 Mohammed Mana Street Off Abacha Road,                            | Karu        | Nasarawa |
| 5550 | NW/0119 | NW/0119/S/1  | Edither Choice Hospital             |  | 1 Mohammed Mana Street Off Abacha Road,                            | Karu        | Nasarawa |
| 5551 | NW/0121 | NW/0121/S/4  | Oshyeg'Ba Josh Medical Centre Lafia |  | Behind Ministry Of Justice, Off Shendam Road, Lafia Nasarawa State | Lafia       | Nasarawa |
| 5552 | NW/0128 | NW/0128/S/1  | Oshyeg'Ba Josh Medical Centre Lafia |  | Behind Ministry Of Justice, Off Shendam Road, Lafia Nasarawa State | Lafia       | Nasarawa |
| 5553 | NW/0136 | NW/0136/S/5  | San Health Project Lafia East       |  | Newtaal Road Along Lafia East Primary School Lafia                 | Lafia       | Nasarawa |
| 5554 | OD/0001 | OD/0001/S/8  | State Specialist Hospital,Ikare     |  | Ikare Akoko                                                        | Akure South | Ondo     |
| 5555 | OD/0001 | OD/0001/S/15 | State Specialist Hospital,Ikare     |  | Ikare Akoko                                                        | Akure South | Ondo     |
| 5556 | OD/0001 | OD/0001/S/5  | State Specialist Hospital,Ikare     |  | Ikare Akoko                                                        | Akure South | Ondo     |
| 5557 | OD/0001 | OD/0001/S/7  | State Specialist Hospital,Ikare     |  | Ikare Akoko                                                        | Akure South | Ondo     |
| 5558 | OD/0001 | OD/0001/S/4  | State Specialist Hospital,Ikare     |  | Ikare Akoko                                                        | Akure South | Ondo     |
| 5559 | OD/0005 | OD/0005/S/2  | Sijuwade Specialist Hospital        |  | 10,SIJUWADE BAA-SEGUN RD, AKURE                                    | Akure North | Ondo     |
| 5560 | OD/0005 | OD/0005/S/6  | Sijuwade Specialist Hospital        |  | 10,SIJUWADE BAA-SEGUN RD, AKURE                                    | Akure North | Ondo     |
| 5561 | OD/0005 | OD/0005/S/7  | Sijuwade Specialist Hospital        |  | 10,SIJUWADE BAA-SEGUN RD, AKURE                                    | Akure North | Ondo     |
| 5562 | OD/0005 | OD/0005/S/14 | Sijuwade Specialist Hospital        |  | 10,SIJUWADE BAA-SEGUN RD, AKURE                                    | Akure North | Ondo     |
| 5563 | OD/0005 | OD/0005/S/4  | Sijuwade Specialist Hospital        |  | 10,SIJUWADE BAA-SEGUN RD, AKURE                                    | Akure North | Ondo     |
| 5564 | OD/0006 | OD/0006/S/5  | St. David's Hospital                |  | OBA ADESIDA RD.AKURE                                               | Akure North | Ondo     |
| 5565 | OD/0007 | OD/0007/S/7  | St. John & Mary Hospital            |  | 2 Adebayo Onilane Isikan Allase Akure                              | Akure North | Ondo     |
| 5566 | OD/0007 | OD/0007/S/5  | St. John & Mary Hospital            |  | 2 Adebayo Onilane Isikan Allase Akure                              | Akure North | Ondo     |
| 5567 | OD/0009 | OD/0009/S/1  | Joe-Jane Medicine Centre            |  | Okejebu Rd. Akure                                                  | Akure North | Ondo     |
| 5568 | OD/0009 | OD/0009/S/5  | Joe-Jane Medicine Centre            |  | Okejebu Rd. Akure                                                  | Akure North | Ondo     |
| 5569 | OD/0009 | OD/0009/S/7  | Joe-Jane Medicine Centre            |  | Okejebu Rd. Akure                                                  | Akure North | Ondo     |
| 5570 | OD/0010 | OD/0010/S/7  | Abitoye Hospital                    |  | 101, Ijoka Road, Akure                                             | Akure North | Ondo     |
| 5571 | OD/0011 | OD/0011/S/3  | State Specialist Hospital, Akure    |  | Akure                                                              | Akure North | Ondo     |
| 5572 | OD/0011 | OD/0011/S/7  | State Specialist Hospital, Akure    |  | Akure                                                              | Akure North | Ondo     |
| 5573 | OD/0011 | OD/0011/S/4  | State Specialist Hospital, Akure    |  | Akure                                                              | Akure North | Ondo     |
| 5574 | OD/0011 | OD/0011/S/1  | State Specialist Hospital, Akure    |  | Akure                                                              | Akure North | Ondo     |
| 5575 | OD/0011 | OD/0011/S/2  | State Specialist Hospital, Akure    |  | Akure                                                              | Akure North | Ondo     |
| 5576 | OD/0011 | OD/0011/S/12 | State Specialist Hospital, Akure    |  | Akure                                                              | Akure North | Ondo     |
| 5577 | OD/0011 | OD/0011/S/5  | State Specialist Hospital, Akure    |  | Akure                                                              | Akure North | Ondo     |
| 5578 | OD/0011 | OD/0011/S/8  | State Specialist Hospital, Akure    |  | Akure                                                              | Akure North | Ondo     |
| 5579 | OD/0011 | OD/0011/S/11 | State Specialist Hospital, Akure    |  | Akure                                                              | Akure North | Ondo     |
| 5580 | OD/0011 | OD/0011/S/15 | State Specialist Hospital, Akure    |  | Akure                                                              | Akure North | Ondo     |
| 5581 | OD/0015 | OD/0015/S/7  | State Specialist Hospital,Okitipupa |  | Okitipupa                                                          | Okitipupa   | Ondo     |
| 5582 | OD/0015 | OD/0015/S/8  | State Specialist Hospital,Okitipupa |  | Okitipupa                                                          | Okitipupa   | Ondo     |
| 5583 | OD/0015 | OD/0015/S/4  | State Specialist Hospital,Okitipupa |  | Okitipupa                                                          | Okitipupa   | Ondo     |
| 5584 | OD/0015 | OD/0015/S/15 | State Specialist Hospital,Okitipupa |  | Okitipupa                                                          | Okitipupa   | Ondo     |
| 5585 | OD/0015 | OD/0015/S/5  | State Specialist Hospital,Okitipupa |  | Okitipupa                                                          | Okitipupa   | Ondo     |
| 5586 | OD/0018 | OD/0018/S/2  | Federal Medical Centre - Owo        |  | Owo                                                                | Owo         | Ondo     |
| 5587 | OD/0018 | OD/0018/S/6  | Federal Medical Centre - Owo        |  | Owo                                                                | Owo         | Ondo     |
| 5588 | OD/0018 | OD/0018/S/10 | Federal Medical Centre - Owo        |  | Owo                                                                | Owo         | Ondo     |



|      |         |              |                                            |                 |                                                           |                  |      |
|------|---------|--------------|--------------------------------------------|-----------------|-----------------------------------------------------------|------------------|------|
| 5589 | OD/0018 | OD/0018/S/4  | Federal Medical Centre - Owo               |                 | Owo                                                       | Owo              | Ondo |
| 5590 | OD/0018 | OD/0018/S/5  | Federal Medical Centre - Owo               |                 | Owo                                                       | Owo              | Ondo |
| 5591 | OD/0018 | OD/0018/S/3  | Federal Medical Centre - Owo               |                 | Owo                                                       | Owo              | Ondo |
| 5592 | OD/0018 | OD/0018/S/1  | Federal Medical Centre - Owo               |                 | Owo                                                       | Owo              | Ondo |
| 5593 | OD/0018 | OD/0018/S/7  | Federal Medical Centre - Owo               |                 | Owo                                                       | Owo              | Ondo |
| 5594 | OD/0021 | OD/0021/S/5  | State Specialist Hospital, Ondo            |                 | Ondo                                                      | Akure North      | Ondo |
| 5595 | OD/0021 | OD/0021/S/7  | State Specialist Hospital, Ondo            |                 | Ondo                                                      | Akure North      | Ondo |
| 5596 | OD/0021 | OD/0021/S/4  | State Specialist Hospital, Ondo            |                 | Ondo                                                      | Akure North      | Ondo |
| 5597 | OD/0021 | OD/0021/S/8  | State Specialist Hospital, Ondo            |                 | Ondo                                                      | Akure North      | Ondo |
| 5598 | OD/0021 | OD/0021/S/15 | State Specialist Hospital, Ondo            |                 | Ondo                                                      | Akure North      | Ondo |
| 5599 | OD/0021 | OD/0021/S/11 | State Specialist Hospital, Ondo            |                 | Ondo                                                      | Akure North      | Ondo |
| 5600 | OD/0022 | OD/0022/S/7  | Oludare Hospital                           |                 | Fanibi Layout, Akure                                      | Akure North      | Ondo |
| 5601 | OD/0022 | OD/0022/S/5  | Oludare Hospital                           |                 | Fanibi Layout, Akure                                      | Akure North      | Ondo |
| 5602 | OD/0022 | OD/0022/S/4  | Oludare Hospital                           |                 | Fanibi Layout, Akure                                      | Akure North      | Ondo |
| 5603 | OD/0027 | OD/0027/S/4  | Tolfad Pharmacy                            | Pharmacy        | Akure                                                     | Akure South      | Ondo |
| 5604 | OD/0030 | OD/0030/S/4  | Betak Pharmacy                             | Pharmacy        | Ikare Akoko                                               | Akoko North East | Ondo |
| 5605 | OD/0031 | OD/0031/S/4  | Akinbinu Pharmacy                          | Pharmacy        | Ondo                                                      | Ondo West        | Ondo |
| 5606 | OD/0032 | OD/0032/S/4  | Finolex Pharmacy                           | Pharmacy        | Ondo                                                      | Ondo West        | Ondo |
| 5607 | OD/0035 | OD/0035/S/11 | Joymas Phsiotherapy                        | Physiotherapy   | Owo Road, Akure                                           | Akure South      | Ondo |
| 5608 | OD/0036 | OD/0036/S/4  | Welfast Pharmacy                           | Pharmacy        | 135, Hospital Road, Akure                                 | Akure South      | Ondo |
| 5609 | OD/0037 | OD/0037/S/4  | Dele Ayo Pharmacy Limited                  | Pharmacy        | No. 40 (Old 27) Ijebu Street Akure                        | Akure South      | Ondo |
| 5610 | OD/0039 | OD/0039/S/4  | De-Zubik Pharmaceutical Ltd                | Pharmacy        | 15 Ondo Road Akure                                        | Akure South      | Ondo |
| 5611 | OD/0041 | OD/0041/S/4  | Tunde & Tunde Pharmacy                     | Pharmacy        | 5 Aguda Street Ijokodo, Okitipupa                         | Okitipupa        | Ondo |
| 5612 | OD/0045 | OD/0045/S/4  | Adeyemi College Of Education Health Centre |                 | Ondo State                                                | Akure North      | Ondo |
| 5613 | OD/0047 | OD/0047/S/3  | Ayo Specialist Hospital                    | O & G           | Off Illesha Rd., Akure                                    | Akure South      | Ondo |
| 5614 | OD/0052 | OD/0052/S/1  | Liberty Hospital & Maternity               | General Surgery | Oluwatunyi Quarters off Ijoko Road ,Akure                 | Akure South      | Ondo |
| 5615 | OD/0053 | OD/0053/S/7  | First Mercy Specialist Hospital            |                 | 19c Gbogi street, off Osa Adesida Road, Akure             | Akure South      | Ondo |
| 5616 | OD/0053 | OD/0053/S/4  | First Mercy Specialist Hospital            |                 | 19c Gbogi street, off Osa Adesida Road, Akure             | Akure South      | Ondo |
| 5617 | OD/0053 | OD/0053/S/3  | First Mercy Specialist Hospital            |                 | 19c Gbogi street, off Osa Adesida Road, Akure             | Akure South      | Ondo |
| 5618 | OD/0053 | OD/0053/S/6  | First Mercy Specialist Hospital            |                 | 19c Gbogi street, off Osa Adesida Road, Akure             | Akure South      | Ondo |
| 5619 | OD/0053 | OD/0053/S/5  | First Mercy Specialist Hospital            |                 | 19c Gbogi street, off Osa Adesida Road, Akure             | Akure South      | Ondo |
| 5620 | OD/0053 | OD/0053/S/1  | First Mercy Specialist Hospital            |                 | 19c Gbogi street, off Osa Adesida Road, Akure             | Akure South      | Ondo |
| 5621 | OD/0054 | OD/0054/S/1  | MOMAAK Specialist Hospital                 |                 | 3 Lafe Inn way, Okuta Eleri                               | Akure South      | Ondo |
| 5622 | OD/0054 | OD/0054/S/12 | MOMAAK Specialist Hospital                 |                 | 3 Lafe Inn way, Okuta Eleri                               | Akure South      | Ondo |
| 5623 | OD/0057 | OD/0057/S/3  | City Specialist Hospital                   |                 | 56 Oke Arata street, Igbo-Oliki, Akure, Ondo State        | Akure South      | Ondo |
| 5624 | OD/0058 | OD/0058/S/7  | Adedewe Okunriboye Hospital                |                 | Opposite Celestial Church, Ondo Road Bye pass, Akure      | Akure South      | Ondo |
| 5625 | OD/0058 | OD/0058/S/5  | Adedewe Okunriboye Hospital                |                 | Opposite Celestial Church, Ondo Road Bye pass, Akure      | Akure South      | Ondo |
| 5626 | OD/0062 | OD/0062/S/6  | Ogunsusi Memorial Hospital                 |                 | 1 Zion Estate, Ile-oluji                                  | Ileoluji/Okeigbo | Ondo |
| 5627 | OD/0064 | OD/0064/S/1  | Fujah Specialist Hospital                  |                 | 22, Adetutu Street, Opp. Isikan Market, Akure, Ondo State | Akure South      | Ondo |
| 5628 | OD/0064 | OD/0064/S/10 | Fujah Specialist Hospital                  |                 | 22, Adetutu Street, Opp. Isikan Market, Akure, Ondo State | Akure South      | Ondo |
| 5629 | OD/0064 | OD/0064/S/3  | Fujah Specialist Hospital                  |                 | 22, Adetutu Street, Opp. Isikan Market, Akure, Ondo State | Akure South      | Ondo |
| 5630 | OD/0068 | OD/0068/S/4  | Kibs Pharmacy                              | Pharmacy        | 91 Oba adesida Rd Akure                                   | Akure South      | Ondo |
| 5631 | OD/0069 | OD/0069/S/15 | Stephens Eye & Medical Centre              | Ophthalmology   | 7A Mode Street Yaba Ondo                                  | Ondo West        | Ondo |
| 5632 | OD/0072 | OD/0072/S/11 | E. M. Physiotherapy Services               | Physiotherapy   | 61 Brig Ademulegun Rd Ondo                                | Ondo West        | Ondo |
| 5633 | OD/0074 | OD/0074/S/5  | Police Clinics, Ondo                       |                 | Ondo State                                                | Ondo West        | Ondo |
| 5634 | OD/0074 | OD/0074/S/3  | Police Clinics, Ondo                       |                 | Ondo State                                                | Ondo West        | Ondo |

|      |         |              |                                                |            |                                                                        |                  |      |
|------|---------|--------------|------------------------------------------------|------------|------------------------------------------------------------------------|------------------|------|
| 5635 | OD/0074 | OD/0074/S/13 | Police Clinics, Ondo                           |            | Ondo State                                                             | Ondo West        | Ondo |
| 5636 | OD/0074 | OD/0074/S/6  | Police Clinics, Ondo                           |            | Ondo State                                                             | Ondo West        | Ondo |
| 5637 | OD/0074 | OD/0074/S/4  | Police Clinics, Ondo                           |            | Ondo State                                                             | Ondo West        | Ondo |
| 5638 | OD/0074 | OD/0074/S/2  | Police Clinics, Ondo                           |            | Ondo State                                                             | Ondo West        | Ondo |
| 5639 | OD/0074 | OD/0074/S/8  | Police Clinics, Ondo                           |            | Ondo State                                                             | Ondo West        | Ondo |
| 5640 | OD/0074 | OD/0074/S/7  | Police Clinics, Ondo                           |            | Ondo State                                                             | Ondo West        | Ondo |
| 5641 | OD/0074 | OD/0074/S/1  | Police Clinics, Ondo                           |            | Ondo State                                                             | Ondo West        | Ondo |
| 5642 | OD/0074 | OD/0074/S/14 | Police Clinics, Ondo                           |            | Ondo State                                                             | Ondo West        | Ondo |
| 5643 | OD/0074 | OD/0074/S/11 | Police Clinics, Ondo                           |            | Ondo State                                                             | Ondo West        | Ondo |
| 5644 | OD/0076 | OD/0076/S/4  | Federal University of Technology Health Centre |            | Akure, Ondo State                                                      | Akure North      | Ondo |
| 5645 | OD/0076 | OD/0076/S/5  | Federal University of Technology Health Centre |            | Akure, Ondo State                                                      | Akure North      | Ondo |
| 5646 | OD/0081 | OD/0081/S/5  | BABALOLA NINEWELLS SPEC. HOSPITAL              |            | 46, ABITOYE STREET, OSHOKOTI LAYOUT, AKURE                             | Akure South      | Ondo |
| 5647 | OD/0081 | OD/0081/S/1  | BABALOLA NINEWELLS SPEC. HOSPITAL              |            | 46, ABITOYE STREET, OSHOKOTI LAYOUT, AKURE                             | Akure South      | Ondo |
| 5648 | OD/0082 | OD/0082/S/14 | ARIF MEDICAL CENTER                            |            | BEHIND SABO MAIN MARKET ORE                                            | Odigbo           | Ondo |
| 5649 | OD/0082 | OD/0082/S/5  | ARIF MEDICAL CENTER                            |            | BEHIND SABO MAIN MARKET ORE                                            | Odigbo           | Ondo |
| 5650 | OD/0082 | OD/0082/S/7  | ARIF MEDICAL CENTER                            |            | BEHIND SABO MAIN MARKET ORE                                            | Odigbo           | Ondo |
| 5651 | OD/0083 | OD/0083/S/1  | SHEKINAH HOSPITALS                             |            | BEHIND OLD OWO GARAGE, OFF EL-SHADDAI RD. AKURE                        | Akure South      | Ondo |
| 5652 | OD/0098 | OD/0098/S/5  | HALLMARK MEDICAL LAB.SERVICES                  | LABORATORY | 57B, ARAKARE RD., AKURE                                                | Akure South      | Ondo |
| 5653 | OD/0105 | OD/0105/S/2  | Kharis Medical Centre                          |            | 2 Ondo Bye-Pass JUT, Oyeme Road                                        | Akure South      | Ondo |
| 5654 | OD/0108 | OD/0108/S/5  | Sckye Hospital Ltd                             |            | 83B Oba Adesida Road, Akure                                            | Akure South      | Ondo |
| 5655 | OD/0108 | OD/0108/S/4  | Sckye Hospital Ltd                             |            | 83B Oba Adesida Road, Akure                                            | Akure South      | Ondo |
| 5656 | OD/0108 | OD/0108/S/3  | Sckye Hospital Ltd                             |            | 83B Oba Adesida Road, Akure                                            | Akure South      | Ondo |
| 5657 | OD/0111 | OD/0111/S/15 | Tomisan Specialist Eye Clinic                  |            | Within Joe Jane Medical Centre, Akure                                  | Akure South      | Ondo |
| 5658 | OD/0113 | OD/0113/S/5  | General Hospital, Ile Oluji                    |            | Ile Oluji, Ondo State                                                  | Ileoluji/Okeigbo | Ondo |
| 5659 | OD/0113 | OD/0113/S/4  | General Hospital, Ile Oluji                    |            | Ile Oluji, Ondo State                                                  | Ileoluji/Okeigbo | Ondo |
| 5660 | OD/0114 | OD/0114/S/4  | General Hospital                               |            | Opp Anglican Grammar School, Oke-Ogbe, Iju-Itaogbolu, Ondo State       | Akure North      | Ondo |
| 5661 | OD/0114 | OD/0114/S/7  | General Hospital                               |            | Opp Anglican Grammar School, Oke-Ogbe, Iju-Itaogbolu, Ondo State       | Akure North      | Ondo |
| 5662 | OD/0117 | OD/0117/S/15 | Eniola Medical Clinic                          |            | Building 2, York City Close, Ago Itunu, Ondo                           | Ondo West        | Ondo |
| 5663 | OD/0118 | OD/0118/S/7  | General Hospital Igbokoda                      |            | Omomira Street, Igbokoda                                               | Ilaje            | Ondo |
| 5664 | OD/0118 | OD/0118/S/5  | General Hospital Igbokoda                      |            | Omomira Street, Igbokoda                                               | Ilaje            | Ondo |
| 5665 | OD/0118 | OD/0118/S/4  | General Hospital Igbokoda                      |            | Omomira Street, Igbokoda                                               | Ilaje            | Ondo |
| 5666 | OD/0118 | OD/0118/S/3  | General Hospital Igbokoda                      |            | Omomira Street, Igbokoda                                               | Ilaje            | Ondo |
| 5667 | OD/0122 | OD/0122/S/1  | Hopeland Specialist Medical Center             |            | 1, Arikawe Street, Akure, Ondo state                                   | Akure South      | Ondo |
| 5668 | OD/0122 | OD/0122/S/3  | Hopeland Specialist Medical Center             |            | 1, Arikawe Street, Akure, Ondo state                                   | Akure South      | Ondo |
| 5669 | OD/0127 | OD/0127/S/3  | Victory Specialist Hospital                    |            | 4, Victory Street, Ibitayo Estate, Ondo                                | Ondo West        | Ondo |
| 5670 | OD/0131 | OD/0131/S/1  | Owoyemi Specialist Hospital                    |            | 5, Oshinle road, Akure-ondo, Olu Kayode roundabout, Akure, Ondo State. | Akure South      | Ondo |
| 5671 | OD/0136 | OD/0136/S/4  | Pharmacy First O                               |            | 1, Opp. Owe Akala Junction, Oke Aro Akure Ondo State                   | Akure North      | Ondo |
| 5672 | OD/0137 | OD/0137/S/4  | His Grace KSP Pharm. LTD                       |            | 1a Aule Road, Akure                                                    | Akure South      | Ondo |
| 5673 | OD/0138 | OD/0138/S/4  | Julie Bolakit Pharmaceutical LTD               |            | Block 1, Old Customs Buildings, Ondo Road Akure                        | Akure South      | Ondo |
| 5674 | OD/0139 | OD/0139/S/5  | Davosach Med. Lab.                             |            | No 133, State Hospital road, Akure                                     | Akure South      | Ondo |
| 5675 | OD/0140 | OD/0140/S/15 | Millennium Eye Clinic                          |            | State Specialist Hospital Akure Ondo State                             | Akure South      | Ondo |
| 5676 | OD/0141 | OD/0141/S/4  | BOT Pharmacy                                   |            | 144, Hospital Road Akure                                               | Akure South      | Ondo |
| 5677 | OD/0142 | OD/0142/S/13 | Britaview Eye Clinic                           |            | 102a Hospital Road Akure                                               | Akure South      | Ondo |
| 5678 | OD/0148 | OD/0148/S/4  | Fegtochi Pharmacy                              |            | 35 Oluwatuyi Quarters Akure Ondo State                                 | Akure South      | Ondo |

|      |         |              |                                                   |        |                                                            |                 |      |
|------|---------|--------------|---------------------------------------------------|--------|------------------------------------------------------------|-----------------|------|
| 5679 | OD/0149 | OD/0149/S/3  | Goshenland Specialist Hospital & Fertility Centre |        | Block A. Plot 35 Aaye Community Oda Road. Akure Ondo State | Akure South     | Ondo |
| 5680 | OD/0150 | OD/0150/S/14 | Midas Clinic                                      |        | 65,Oke-ljebu Street Akure Ondo State                       | Akure South     | Ondo |
| 5681 | OD/0150 | OD/0150/S/16 | Midas Clinic                                      |        | 65,Oke-ljebu Street Akure Ondo State                       | Akure South     | Ondo |
| 5682 | OD/0151 | OD/0151/S/7  | Paramount Specialist Hospital & Fertility Centre  |        | 22 Sydney Emmanuel Crescent, Valentino Street, Ondo State  | Ondo West       | Ondo |
| 5683 | OD/0151 | OD/0151/S/3  | Paramount Specialist Hospital & Fertility Centre  |        | 22 Sydney Emmanuel Crescent, Valentino Street, Ondo State  | Ondo West       | Ondo |
| 5684 | OD/0152 | OD/0152/S/13 | His Apple Eye Clinic                              |        | 63A Oyemekun Road, Akure Ondo state                        | Akure South     | Ondo |
| 5685 | OD/0153 | OD/0153/S/7  | Paramount Spec. Hosp. & Fertility Centre          |        | 22 Sydney Emmanuel Crescent, Valentino St. Ondo State      | Ondo West       | Ondo |
| 5686 | OD/0155 | OD/0155/S/1  | Kaymas Medical Centre                             |        | Newtown, Oke-Aro, Akure Ondo State                         | Akure South     | Ondo |
| 5687 | OD/0156 | OD/0156/S/7  | Miteda Specialist Hospital                        |        | Plot 5,Laoye Adegoke Road, Alagbaka, Akure Ondo State      | Akure South     | Ondo |
| 5688 | OD/0156 | OD/0156/S/5  | Miteda Specialist Hospital                        |        | Plot 5,Laoye Adegoke Road, Alagbaka, Akure Ondo State      | Akure South     | Ondo |
| 5689 | OD/0157 | OD/0157/S/3  | Blue Print Specialist Clinic                      |        | 3, Falodun Avenue Oke-Ogun, Owo Ondo State                 | Owo             | Ondo |
| 5690 | OD/0158 | OD/0158/S/3  | Pima Hospital & Maternity                         |        | Off Okitipupa Road, Ore Ondo State                         | Odigbo          | Ondo |
| 5691 | OG/0001 | OG/0001/S/3  | Federal Medical Centre, Abeokuta                  |        | Bisi Onabanjo Way, Idi-Aba, Abeokuta, Ogun State           | Abeokuta South  | Ogun |
| 5692 | OG/0001 | OG/0001/S/4  | Federal Medical Centre, Abeokuta                  |        | Bisi Onabanjo Way, Idi-Aba, Abeokuta, Ogun State           | Abeokuta South  | Ogun |
| 5693 | OG/0001 | OG/0001/S/7  | Federal Medical Centre, Abeokuta                  |        | Bisi Onabanjo Way, Idi-Aba, Abeokuta, Ogun State           | Abeokuta South  | Ogun |
| 5694 | OG/0001 | OG/0001/S/10 | Federal Medical Centre, Abeokuta                  |        | Bisi Onabanjo Way, Idi-Aba, Abeokuta, Ogun State           | Abeokuta South  | Ogun |
| 5695 | OG/0001 | OG/0001/S/15 | Federal Medical Centre, Abeokuta                  |        | Bisi Onabanjo Way, Idi-Aba, Abeokuta, Ogun State           | Abeokuta South  | Ogun |
| 5696 | OG/0001 | OG/0001/S/11 | Federal Medical Centre, Abeokuta                  |        | Bisi Onabanjo Way, Idi-Aba, Abeokuta, Ogun State           | Abeokuta South  | Ogun |
| 5697 | OG/0001 | OG/0001/S/1  | Federal Medical Centre, Abeokuta                  |        | Bisi Onabanjo Way, Idi-Aba, Abeokuta, Ogun State           | Abeokuta South  | Ogun |
| 5698 | OG/0001 | OG/0001/S/2  | Federal Medical Centre, Abeokuta                  |        | Bisi Onabanjo Way, Idi-Aba, Abeokuta, Ogun State           | Abeokuta South  | Ogun |
| 5699 | OG/0001 | OG/0001/S/8  | Federal Medical Centre, Abeokuta                  |        | Bisi Onabanjo Way, Idi-Aba, Abeokuta, Ogun State           | Abeokuta South  | Ogun |
| 5700 | OG/0001 | OG/0001/S/6  | Federal Medical Centre, Abeokuta                  |        | Bisi Onabanjo Way, Idi-Aba, Abeokuta, Ogun State           | Abeokuta South  | Ogun |
| 5701 | OG/0002 | OG/0002/S/10 | Mercy Group Clinics                               |        | Back Of Uba Building Pansheke, Ibara, Abeokuta             | Abeokuta South  | Ogun |
| 5702 | OG/0002 | OG/0002/S/1  | Mercy Group Clinics                               |        | Back Of Uba Building Pansheke, Ibara, Abeokuta             | Abeokuta South  | Ogun |
| 5703 | OG/0002 | OG/0002/S/3  | Mercy Group Clinics                               |        | Back Of Uba Building Pansheke, Ibara, Abeokuta             | Abeokuta South  | Ogun |
| 5704 | OG/0002 | OG/0002/S/4  | Mercy Group Clinics                               |        | Back Of Uba Building Pansheke, Ibara, Abeokuta             | Abeokuta South  | Ogun |
| 5705 | OG/0004 | OG/0004/S/1  | Femtob Specialist Hospital                        |        | No. 5 Obileye Street, Gra, Ijebu-Ode                       | Ijebu Ode       | Ogun |
| 5706 | OG/0006 | OG/0006/S/4  | Oba Ademola Maternity Hospital                    |        | Ijemo, Abeokuta                                            | Abeokuta South  | Ogun |
| 5707 | OG/0006 | OG/0006/S/3  | Oba Ademola Maternity Hospital                    |        | Ijemo, Abeokuta                                            | Abeokuta South  | Ogun |
| 5708 | OG/0007 | OG/0007/S/11 | Neuropsychiatric Hospital                         |        | Aro, Abeokuta, Ogun State                                  | Abeokuta North  | Ogun |
| 5709 | OG/0007 | OG/0007/S/5  | Neuropsychiatric Hospital                         |        | Aro, Abeokuta, Ogun State                                  | Abeokuta North  | Ogun |
| 5710 | OG/0007 | OG/0007/S/9  | Neuropsychiatric Hospital                         |        | Aro, Abeokuta, Ogun State                                  | Abeokuta North  | Ogun |
| 5711 | OG/0007 | OG/0007/S/4  | Neuropsychiatric Hospital                         |        | Aro, Abeokuta, Ogun State                                  | Abeokuta North  | Ogun |
| 5712 | OG/0016 | OG/0016/S/8  | Ogun State Dental Clinic                          | Dental | Abeokuta, Ogun State                                       | Ogun Water Side | Ogun |

|      |         |              |                                                   |                  |                                                              |                 |      |
|------|---------|--------------|---------------------------------------------------|------------------|--------------------------------------------------------------|-----------------|------|
| 5713 | OG/0017 | OG/0017/S/4  | Fontana Pharmaceutical Chemist & Stores Co. Ltd.  | Pharmacy         | 75, Ejinrin Road, Ijebu-Ode, Ogun State                      | Ijebu Ode       | Ogun |
| 5714 | OG/0018 | OG/0018/S/4  | NATBEL Pharmacy                                   | Pharmacy         | A5/32 Hospital Road, Shagamu, Ogun State                     | Sagamu          | Ogun |
| 5715 | OG/0019 | OG/0019/S/4  | Precious Pharmacy & Stores Ltd.                   | Pharmacy         | 114, Awolowo Avenue, Omida, Abeokuta, Ogun State             | Ogun Water Side | Ogun |
| 5716 | OG/0020 | OG/0020/S/4  | A-Z Pharmacy                                      | Pharmacy         | 68, Okejigbo Street, Abeokuta, Ogun State                    | Abeokuta South  | Ogun |
| 5717 | OG/0021 | OG/0021/S/4  | Nisam Pharmacy and Stores                         | Pharmacy         | 1, Kulo Road, Isabo, Abeokuta, Ogun State                    | Ogun Water Side | Ogun |
| 5718 | OG/0023 | OG/0023/S/5  | Kenny Ogun Lab. Complex                           | Laboratory       | 1, Kenny Ogun Lab. Street., Ilupeju Estate, Ita-Elegba, Abeo | Abeokuta North  | Ogun |
| 5719 | OG/0026 | OG/0026/S/4  | State Hospital, Ijebu-Ode                         |                  | Ijebu-Ode                                                    | Ijebu Ode       | Ogun |
| 5720 | OG/0026 | OG/0026/S/5  | State Hospital, Ijebu-Ode                         |                  | Ijebu-Ode                                                    | Ijebu Ode       | Ogun |
| 5721 | OG/0026 | OG/0026/S/11 | State Hospital, Ijebu-Ode                         |                  | Ijebu-Ode                                                    | Ijebu Ode       | Ogun |
| 5722 | OG/0026 | OG/0026/S/6  | State Hospital, Ijebu-Ode                         |                  | Ijebu-Ode                                                    | Ijebu Ode       | Ogun |
| 5723 | OG/0026 | OG/0026/S/3  | State Hospital, Ijebu-Ode                         |                  | Ijebu-Ode                                                    | Ijebu Ode       | Ogun |
| 5724 | OG/0026 | OG/0026/S/1  | State Hospital, Ijebu-Ode                         |                  | Ijebu-Ode                                                    | Ijebu Ode       | Ogun |
| 5725 | OG/0027 | OG/0027/S/7  | State Hospital, Abeokuta                          |                  | Abeokuta, Ogun State                                         | Abeokuta South  | Ogun |
| 5726 | OG/0027 | OG/0027/S/15 | State Hospital, Abeokuta                          |                  | Abeokuta, Ogun State                                         | Abeokuta South  | Ogun |
| 5727 | OG/0027 | OG/0027/S/11 | State Hospital, Abeokuta                          |                  | Abeokuta, Ogun State                                         | Abeokuta South  | Ogun |
| 5728 | OG/0027 | OG/0027/S/4  | State Hospital, Abeokuta                          |                  | Abeokuta, Ogun State                                         | Abeokuta South  | Ogun |
| 5729 | OG/0027 | OG/0027/S/2  | State Hospital, Abeokuta                          |                  | Abeokuta, Ogun State                                         | Abeokuta South  | Ogun |
| 5730 | OG/0027 | OG/0027/S/3  | State Hospital, Abeokuta                          |                  | Abeokuta, Ogun State                                         | Abeokuta South  | Ogun |
| 5731 | OG/0027 | OG/0027/S/6  | State Hospital, Abeokuta                          |                  | Abeokuta, Ogun State                                         | Abeokuta South  | Ogun |
| 5732 | OG/0027 | OG/0027/S/1  | State Hospital, Abeokuta                          |                  | Abeokuta, Ogun State                                         | Abeokuta South  | Ogun |
| 5733 | OG/0027 | OG/0027/S/5  | State Hospital, Abeokuta                          |                  | Abeokuta, Ogun State                                         | Abeokuta South  | Ogun |
| 5734 | OG/0028 | OG/0028/S/4  | Fentob Pharmaceutical Chemist & Stores            | Pharmacy         | 1 Tal Bot Road, Opp. St. Augustine, Catholic Sch., Ijebu-Ode | Ijebu Ode       | Ogun |
| 5735 | OG/0031 | OG/0031/S/5  | Hetta Medical Centre                              |                  | 15, Martina Road, Sango, Ota                                 | Ado Odo-Ota     | Ogun |
| 5736 | OG/0031 | OG/0031/S/4  | Hetta Medical Centre                              |                  | 15, Martina Road, Sango, Ota                                 | Ado Odo-Ota     | Ogun |
| 5737 | OG/0031 | OG/0031/S/7  | Hetta Medical Centre                              |                  | 15, Martina Road, Sango, Ota                                 | Ado Odo-Ota     | Ogun |
| 5738 | OG/0032 | OG/0032/S/1  | Larion Medical Centre                             |                  | 8, Laz Ukwuoma Close, Morogbo Agbara, Lagos.                 | Ado Odo-Ota     | Ogun |
| 5739 | OG/0034 | OG/0034/S/7  | Rophe Medical Centre                              |                  | 23, Anambra Crescent, Agbara Estate, Ogun State.             | Ado Odo-Ota     | Ogun |
| 5740 | OG/0034 | OG/0034/S/4  | Rophe Medical Centre                              |                  | 23, Anambra Crescent, Agbara Estate, Ogun State.             | Ado Odo-Ota     | Ogun |
| 5741 | OG/0034 | OG/0034/S/5  | Rophe Medical Centre                              |                  | 23, Anambra Crescent, Agbara Estate, Ogun State.             | Ado Odo-Ota     | Ogun |
| 5742 | OG/0036 | OG/0036/S/3  | Medicare Clinic                                   |                  | 105, Idi-Iroko Road, Otta, Ogun State.                       | Ado Odo-Ota     | Ogun |
| 5743 | OG/0036 | OG/0036/S/6  | Medicare Clinic                                   |                  | 105, Idi-Iroko Road, Otta, Ogun State.                       | Ado Odo-Ota     | Ogun |
| 5744 | OG/0036 | OG/0036/S/2  | Medicare Clinic                                   |                  | 105, Idi-Iroko Road, Otta, Ogun State.                       | Ado Odo-Ota     | Ogun |
| 5745 | OG/0036 | OG/0036/S/8  | Medicare Clinic                                   |                  | 105, Idi-Iroko Road, Otta, Ogun State.                       | Ado Odo-Ota     | Ogun |
| 5746 | OG/0036 | OG/0036/S/7  | Medicare Clinic                                   |                  | 105, Idi-Iroko Road, Otta, Ogun State.                       | Ado Odo-Ota     | Ogun |
| 5747 | OG/0036 | OG/0036/S/4  | Medicare Clinic                                   |                  | 105, Idi-Iroko Road, Otta, Ogun State.                       | Ado Odo-Ota     | Ogun |
| 5748 | OG/0036 | OG/0036/S/5  | Medicare Clinic                                   |                  | 105, Idi-Iroko Road, Otta, Ogun State.                       | Ado Odo-Ota     | Ogun |
| 5749 | OG/0048 | OG/0048/S/3  | Tobiloba Clinic & Maternity                       | Primary Provider | 1 Tobiloba Way off Kuforiji-olubi Estate, Adigbe, Abeokuta   | Abeokuta North  | Ogun |
| 5750 | OG/0052 | OG/0052/S/2  | Mayowa Integrated Medical Services Ltd, Idi-Iroko |                  | 1, ALAWODE WAY, IDI-IROKO                                    | Ipokia          | Ogun |
| 5751 | OG/0053 | OG/0053/S/1  | Central Specialist Hospital                       |                  | 133 Idiroko Rd Ota                                           | Ado Odo-Ota     | Ogun |
| 5752 | OG/0055 | OG/0055/S/3  | Twins Specialist Clinic                           |                  | 2 Gate GRA Ota                                               | Ado Odo-Ota     | Ogun |

|      |         |              |                                               |                      |                                                              |                |      |
|------|---------|--------------|-----------------------------------------------|----------------------|--------------------------------------------------------------|----------------|------|
| 5753 | OG/0057 | OG/0057/S/7  | Ayotola Specialist Hospital                   |                      | 3 Suraju Odunuga Street, Off Baruwa Str, Sagamu              | Sagamu         | Ogun |
| 5754 | OG/0058 | OG/0058/S/5  | Victoria Memorial Hospital                    |                      | Morogbo Agbara                                               | Ado Odo-Ota    | Ogun |
| 5755 | OG/0060 | OG/0060/S/2  | Soremekun Memorial Hospital                   |                      | 127 Lagos-Abeokuta Rd, Vespa B/Stop, Ifo                     | Ifo            | Ogun |
| 5756 | OG/0065 | OG/0065/S/1  | Owokoniran Memorial Hospital                  |                      | 3 Owokoniran Street, Makun Station, Sagamu                   | Sagamu         | Ogun |
| 5757 | OG/0065 | OG/0065/S/3  | Owokoniran Memorial Hospital                  |                      | 3 Owokoniran Street, Makun Station, Sagamu                   | Sagamu         | Ogun |
| 5758 | OG/0073 | OG/0073/S/8  | Farmed Clinics                                | Primary Provider     | 37 Akinwunmi Street Joji Rd. Ota                             | Ado Odo-Ota    | Ogun |
| 5759 | OG/0073 | OG/0073/S/5  | Farmed Clinics                                | Primary Provider     | 37 Akinwunmi Street Joji Rd. Ota                             | Ado Odo-Ota    | Ogun |
| 5760 | OG/0073 | OG/0073/S/3  | Farmed Clinics                                | Primary Provider     | 37 Akinwunmi Street Joji Rd. Ota                             | Ado Odo-Ota    | Ogun |
| 5761 | OG/0076 | OG/0076/S/1  | Rubee Medical Centre Ltd                      |                      | Km 38 Abeokuta Motor Road, Sango, Ota                        | Ado Odo-Ota    | Ogun |
| 5762 | OG/0076 | OG/0076/S/5  | Rubee Medical Centre Ltd                      |                      | Km 38 Abeokuta Motor Road, Sango, Ota                        | Ado Odo-Ota    | Ogun |
| 5763 | OG/0076 | OG/0076/S/7  | Rubee Medical Centre Ltd                      |                      | Km 38 Abeokuta Motor Road, Sango, Ota                        | Ado Odo-Ota    | Ogun |
| 5764 | OG/0080 | OG/0080/S/5  | Ibukun Clinics                                |                      | 1 Agunloye Street, Otta                                      | Ado Odo-Ota    | Ogun |
| 5765 | OG/0081 | OG/0081/S/5  | Kolade Specialist Hospital                    |                      | 68 Idiroko Road, Sango Ota                                   | Ado Odo-Ota    | Ogun |
| 5766 | OG/0082 | OG/0082/S/1  | Ota Specialist Hospital Ltd                   |                      | 67 Idiroko Road, Ota                                         | Ado Odo-Ota    | Ogun |
| 5767 | OG/0083 | OG/0083/S/4  | Barbardox Pharmacy & Stores                   | Pharmacy             | 10 Llubu Street Oke Ilewo Abeokuta                           | Abeokuta South | Ogun |
| 5768 | OG/0089 | OG/0089/S/5  | VCL Chyme Diagnostic Centre                   | Laboratory           | 59 Ijoko Rd. Sango Ota                                       | Ado Odo-Ota    | Ogun |
| 5769 | OG/0111 | OG/0111/S/4  | Jesus is Love & Power Hospital                | Pharmacy, Laboratory | St. Mary's Catholic Church Area Alaja, Ifo                   | Ifo            | Ogun |
| 5770 | OG/0111 | OG/0111/S/5  | Jesus is Love & Power Hospital                | Pharmacy, Laboratory | St. Mary's Catholic Church Area Alaja, Ifo                   | Ifo            | Ogun |
| 5771 | OG/0112 | OG/0112/S/14 | Medytop Specialist Clinic                     |                      | 3 Ejimo Alebiosu Str, Isale Ijagba Sagamu                    | Sagamu         | Ogun |
| 5772 | OG/0112 | OG/0112/S/4  | Medytop Specialist Clinic                     |                      | 3 Ejimo Alebiosu Str, Isale Ijagba Sagamu                    | Sagamu         | Ogun |
| 5773 | OG/0112 | OG/0112/S/1  | Medytop Specialist Clinic                     |                      | 3 Ejimo Alebiosu Str, Isale Ijagba Sagamu                    | Sagamu         | Ogun |
| 5774 | OG/0112 | OG/0112/S/6  | Medytop Specialist Clinic                     |                      | 3 Ejimo Alebiosu Str, Isale Ijagba Sagamu                    | Sagamu         | Ogun |
| 5775 | OG/0112 | OG/0112/S/5  | Medytop Specialist Clinic                     |                      | 3 Ejimo Alebiosu Str, Isale Ijagba Sagamu                    | Sagamu         | Ogun |
| 5776 | OG/0113 | OG/0113/S/3  | New Day Specialist Hospital                   |                      | 7 Sode Street, Akarigbo Sabo Sagamu, Ogun State              | Sagamu         | Ogun |
| 5777 | OG/0113 | OG/0113/S/1  | New Day Specialist Hospital                   |                      | 7 Sode Street, Akarigbo Sabo Sagamu, Ogun State              | Sagamu         | Ogun |
| 5778 | OG/0113 | OG/0113/S/2  | New Day Specialist Hospital                   |                      | 7 Sode Street, Akarigbo Sabo Sagamu, Ogun State              | Sagamu         | Ogun |
| 5779 | OG/0115 | OG/0115/S/1  | Ore-Ofe Clinic                                |                      | 88A Ejirin Rd Ijebu-Ode, Ogun State                          | Ijebu Ode      | Ogun |
| 5780 | OG/0115 | OG/0115/S/3  | Ore-Ofe Clinic                                |                      | 88A Ejirin Rd Ijebu-Ode, Ogun State                          | Ijebu Ode      | Ogun |
| 5781 | OG/0116 | OG/0116/S/2  | Sacred Heart Hospital                         |                      | Lantoro Abeokuta, Ogun State                                 | Abeokuta South | Ogun |
| 5782 | OG/0116 | OG/0116/S/1  | Sacred Heart Hospital                         |                      | Lantoro Abeokuta, Ogun State                                 | Abeokuta South | Ogun |
| 5783 | OG/0116 | OG/0116/S/6  | Sacred Heart Hospital                         |                      | Lantoro Abeokuta, Ogun State                                 | Abeokuta South | Ogun |
| 5784 | OG/0116 | OG/0116/S/7  | Sacred Heart Hospital                         |                      | Lantoro Abeokuta, Ogun State                                 | Abeokuta South | Ogun |
| 5785 | OG/0116 | OG/0116/S/4  | Sacred Heart Hospital                         |                      | Lantoro Abeokuta, Ogun State                                 | Abeokuta South | Ogun |
| 5786 | OG/0116 | OG/0116/S/5  | Sacred Heart Hospital                         |                      | Lantoro Abeokuta, Ogun State                                 | Abeokuta South | Ogun |
| 5787 | OG/0118 | OG/0118/S/5  | first medical diag. services                  | Laboratory           | 24a, sokenu road, oke-ijeun,abeokuta                         | Abeokuta South | Ogun |
| 5788 | OG/0120 | OG/0120/S/5  | JAT DIAGNOSTIC CENTER                         | Laboratory           | 136 AKARIGBO STREET, SAGAMU                                  | Sagamu         | Ogun |
| 5789 | OG/0129 | OG/0129/S/1  | Hossana Specialist Hospital                   |                      | Oja Odan Road, Ilaro                                         | Egbado South   | Ogun |
| 5790 | OG/0130 | OG/0130/S/8  | Access Oral Healthcare Services Dental Clinic |                      | 1 Ogo Oluwa Bankole Crescent, Ibara Housing Estate, Abeokuta | Abeokuta South | Ogun |
| 5791 | OG/0131 | OG/0131/S/1  | Korede Hospital Ltd                           |                      | 17 Onikolobo Road, Ibara, Abeokuta                           | Abeokuta South | Ogun |
| 5792 | OG/0131 | OG/0131/S/3  | Korede Hospital Ltd                           |                      | 17 Onikolobo Road, Ibara, Abeokuta                           | Abeokuta South | Ogun |
| 5793 | OG/0133 | OG/0133/S/5  | Joseph Specialist Hospital                    |                      | 5, Surulere Street off Lalubu Street, Oke Ilewo, Abeokuta    | Abeokuta South | Ogun |
| 5794 | OG/0133 | OG/0133/S/10 | Joseph Specialist Hospital                    |                      | 5, Surulere Street off Lalubu Street, Oke Ilewo, Abeokuta    | Abeokuta South | Ogun |

|      |         |              |                                                       |                      |                                                                      |                |      |
|------|---------|--------------|-------------------------------------------------------|----------------------|----------------------------------------------------------------------|----------------|------|
| 5795 | OG/0133 | OG/0133/S/7  | Joseph Specialist Hospital                            |                      | 5, Surulere Street off Lalubu Street, Oke Ilewo, Abeokuta            | Abeokuta South | Ogun |
| 5796 | OG/0136 | OG/0136/S/3  | Overcomers Specialist Hospital                        |                      | 1 New Koregun Street, Behind Mouka Foam, Town Planning Area, Ilishan | Ikenne         | Ogun |
| 5797 | OG/0138 | OG/0138/S/4  | Blooms Pharmacy & Stores                              | Pharmacy             | 56 Bonajo Street, Ijebu Ode                                          | Ijebu Ode      | Ogun |
| 5798 | OG/0139 | OG/0139/S/4  | Toun Chemist & Variety Stores                         | Pharmacy             | 94 Folagbade Street, Ijebu Ode                                       | Ijebu Ode      | Ogun |
| 5799 | OG/0142 | OG/0142/S/5  | Ore Ofe Elshaddai Clinic                              |                      | 6 Isope Road off Ejirin Road, Texaco Junction, Ijebu Ode             | Ijebu Ode      | Ogun |
| 5800 | OG/0144 | OG/0144/S/3  | Olabisi Onabanjo University Teaching Hospital Shagamu |                      | Shagamu, Ogun State                                                  | Sagamu         | Ogun |
| 5801 | OG/0144 | OG/0144/S/4  | Olabisi Onabanjo University Teaching Hospital Shagamu |                      | Shagamu, Ogun State                                                  | Sagamu         | Ogun |
| 5802 | OG/0144 | OG/0144/S/15 | Olabisi Onabanjo University Teaching Hospital Shagamu |                      | Shagamu, Ogun State                                                  | Sagamu         | Ogun |
| 5803 | OG/0144 | OG/0144/S/7  | Olabisi Onabanjo University Teaching Hospital Shagamu |                      | Shagamu, Ogun State                                                  | Sagamu         | Ogun |
| 5804 | OG/0144 | OG/0144/S/5  | Olabisi Onabanjo University Teaching Hospital Shagamu |                      | Shagamu, Ogun State                                                  | Sagamu         | Ogun |
| 5805 | OG/0144 | OG/0144/S/2  | Olabisi Onabanjo University Teaching Hospital Shagamu |                      | Shagamu, Ogun State                                                  | Sagamu         | Ogun |
| 5806 | OG/0144 | OG/0144/S/10 | Olabisi Onabanjo University Teaching Hospital Shagamu |                      | Shagamu, Ogun State                                                  | Sagamu         | Ogun |
| 5807 | OG/0144 | OG/0144/S/1  | Olabisi Onabanjo University Teaching Hospital Shagamu |                      | Shagamu, Ogun State                                                  | Sagamu         | Ogun |
| 5808 | OG/0144 | OG/0144/S/6  | Olabisi Onabanjo University Teaching Hospital Shagamu |                      | Shagamu, Ogun State                                                  | Sagamu         | Ogun |
| 5809 | OG/0149 | OG/0149/S/3  | Adeyemi Medical Centre                                |                      | 4 Muri Abiola Street, Agbado Station                                 | Ifo            | Ogun |
| 5810 | OG/0152 | OG/0152/S/3  | Lafia Kowa Specialist Hospital                        |                      | 12 Ejirin Road, Ijebu Ode                                            | Ijebu Ode      | Ogun |
| 5811 | OG/0152 | OG/0152/S/1  | Lafia Kowa Specialist Hospital                        |                      | 12 Ejirin Road, Ijebu Ode                                            | Ijebu Ode      | Ogun |
| 5812 | OG/0156 | OG/0156/S/3  | Olu-Ola Specialist Hospital                           |                      | 12B Odo-Egbo Street, Ijebu Ode                                       | Ijebu Ode      | Ogun |
| 5813 | OG/0156 | OG/0156/S/1  | Olu-Ola Specialist Hospital                           |                      | 12B Odo-Egbo Street, Ijebu Ode                                       | Ijebu Ode      | Ogun |
| 5814 | OG/0157 | OG/0157/S/5  | Apex Medical Diagnostic                               | Laboratory           | 8, Ayoola Shopping Complex                                           | Abeokuta South | Ogun |
| 5815 | OG/0158 | OG/0158/S/1  | Akobi Specialist Hospital                             |                      | Plot 5, Blk vw, Molipa Community layout, Ijebu-Ode                   | Ijebu Ode      | Ogun |
| 5816 | OG/0158 | OG/0158/S/3  | Akobi Specialist Hospital                             |                      | Plot 5, Blk vw, Molipa Community layout, Ijebu-Ode                   | Ijebu Ode      | Ogun |
| 5817 | OG/0170 | OG/0170/S/3  | Healing Spring Medical Centre                         |                      | 23 Ilishan Road, Iperu                                               | Ijebu Ode      | Ogun |
| 5818 | OG/0173 | OG/0173/S/8  | Victory Dental Clinic                                 | Dental               | 46 Surulere Street, Cele B/Stop, Akute                               | Ifo            | Ogun |
| 5819 | OG/0174 | OG/0174/S/4  | Amazing Grace Hospital                                | Laboratory, Pharmacy | 7 Iloro Street, Off New Road, Ijebu-Ode                              | Ijebu Ode      | Ogun |
| 5820 | OG/0174 | OG/0174/S/5  | Amazing Grace Hospital                                | Laboratory, Pharmacy | 7 Iloro Street, Off New Road, Ijebu-Ode                              | Ijebu Ode      | Ogun |
| 5821 | OG/0176 | OG/0176/S/3  | First Alpha Medical Centre                            |                      | Kuforiji Olubi Drive, Adigbe, Abeokuta                               | Abeokuta South | Ogun |
| 5822 | OG/0176 | OG/0176/S/14 | First Alpha Medical Centre                            |                      | Kuforiji Olubi Drive, Adigbe, Abeokuta                               | Abeokuta South | Ogun |
| 5823 | OG/0176 | OG/0176/S/1  | First Alpha Medical Centre                            |                      | Kuforiji Olubi Drive, Adigbe, Abeokuta                               | Abeokuta South | Ogun |
| 5824 | OG/0181 | OG/0181/S/3  | Beachland Specialist Hospital                         |                      | Plot 10 Alfirdaus Estate, Arepo, Off Lagos-Abeokuta Express Way      | Obafemi/Owode  | Ogun |
| 5825 | OG/0185 | OG/0185/S/3  | Surgicare Consult                                     |                      | Psalm 23, Oba Oluwa Road, GRA Housing Estate, Ibara, Abeokuta        | Abeokuta South | Ogun |
| 5826 | OG/0185 | OG/0185/S/1  | Surgicare Consult                                     |                      | Psalm 23, Oba Oluwa Road, GRA Housing Estate, Ibara, Abeokuta        | Abeokuta South | Ogun |
| 5827 | OG/0185 | OG/0185/S/5  | Surgicare Consult                                     |                      | Psalm 23, Oba Oluwa Road, GRA Housing Estate, Ibara, Abeokuta        | Abeokuta South | Ogun |
| 5828 | OG/0188 | OG/0188/S/3  | Babcock University Medical Centre                     |                      | Ilisan Remo                                                          | Ikenne         | Ogun |
| 5829 | OG/0188 | OG/0188/S/5  | Babcock University Medical Centre                     |                      | Ilisan Remo                                                          | Ikenne         | Ogun |

|      |         |              |                                            |                                                   |                                                                                          |                |      |
|------|---------|--------------|--------------------------------------------|---------------------------------------------------|------------------------------------------------------------------------------------------|----------------|------|
| 5830 | OG/0188 | OG/0188/S/4  | Babcock University Medical Centre          |                                                   | Ilisan Remo                                                                              | Ikenne         | Ogun |
| 5831 | OG/0189 | OG/0189/S/3  | Otunba Tunwase National Paediatric Centre  | Primary, O & G, Paediatrics, Pharmacy, Laboratory | Shagamu-Benin Express Way, Ijebu-Ode                                                     | Odogbolu       | Ogun |
| 5832 | OG/0189 | OG/0189/S/6  | Otunba Tunwase National Paediatric Centre  | Primary, O & G, Paediatrics, Pharmacy, Laboratory | Shagamu-Benin Express Way, Ijebu-Ode                                                     | Odogbolu       | Ogun |
| 5833 | OG/0189 | OG/0189/S/5  | Otunba Tunwase National Paediatric Centre  | Primary, O & G, Paediatrics, Pharmacy, Laboratory | Shagamu-Benin Express Way, Ijebu-Ode                                                     | Odogbolu       | Ogun |
| 5834 | OG/0189 | OG/0189/S/4  | Otunba Tunwase National Paediatric Centre  | Primary, O & G, Paediatrics, Pharmacy, Laboratory | Shagamu-Benin Express Way, Ijebu-Ode                                                     | Odogbolu       | Ogun |
| 5835 | OG/0192 | OG/0192/S/5  | Shirish Clinic                             |                                                   | 102 Joju Road Otta                                                                       | Ado Odo-Ota    | Ogun |
| 5836 | OG/0199 | OG/0199/S/3  | Goodluck Hopsital & Maternity Home Ltd     |                                                   | 3, The Light Church Close, Mercy Estate, Asokore-Akute                                   | Ifo            | Ogun |
| 5837 | OG/0201 | OG/0201/S/3  | First Contact Hospital and Maternity       |                                                   | 33B, Kuto Road, Behind Yemi-Ola Executive Stores, Abeokuta, Ogun State                   | Abeokuta South | Ogun |
| 5838 | OG/0206 | OG/0206/S/3  | Brims Hospital                             |                                                   | 4, Muraina Soyode Street, behind Olub filling station, Ayetoro road Abeokuta, Ogun State | Abeokuta North | Ogun |
| 5839 | OG/0209 | OG/0209/S/4  | State Hospital Ota, Ogun State             |                                                   | Ota, Ogun State                                                                          | Ado Odo-Ota    | Ogun |
| 5840 | OG/0209 | OG/0209/S/1  | State Hospital Ota, Ogun State             |                                                   | Ota, Ogun State                                                                          | Ado Odo-Ota    | Ogun |
| 5841 | OG/0209 | OG/0209/S/7  | State Hospital Ota, Ogun State             |                                                   | Ota, Ogun State                                                                          | Ado Odo-Ota    | Ogun |
| 5842 | OG/0209 | OG/0209/S/5  | State Hospital Ota, Ogun State             |                                                   | Ota, Ogun State                                                                          | Ado Odo-Ota    | Ogun |
| 5843 | OG/0209 | OG/0209/S/8  | State Hospital Ota, Ogun State             |                                                   | Ota, Ogun State                                                                          | Ado Odo-Ota    | Ogun |
| 5844 | OG/0209 | OG/0209/S/3  | State Hospital Ota, Ogun State             |                                                   | Ota, Ogun State                                                                          | Ado Odo-Ota    | Ogun |
| 5845 | OG/0209 | OG/0209/S/15 | State Hospital Ota, Ogun State             |                                                   | Ota, Ogun State                                                                          | Ado Odo-Ota    | Ogun |
| 5846 | OG/0213 | OG/0213/S/3  | Twins Specialist Clinic                    |                                                   | Plot 11, Gunwa Ola Street GRA Extension, Sagamu, Ogun State                              | Sagamu         | Ogun |
| 5847 | OG/0214 | OG/0214/S/9  | Ishwot Consulting Hospital                 |                                                   | 1 Janet Jibowu Street, Ita-Oshin Behind Old Nepa Office Aro Ogun State.                  | Abeokuta North | Ogun |
| 5848 | OG/0219 | OG/0219/S/3  | Iyaniwura Specilaist Hospital              |                                                   | I Olujobi Falana close, Behind AP filling station, Mowe town, Sagamu, Ogun state         | Sagamu         | Ogun |
| 5849 | OG/0225 | OG/0225/S/5  | Ademuyiwa Med. Diag.& Scan Centre          |                                                   | Flat2 Africa Church Cathedral Estate, Quarry Rd.                                         | Abeokuta North | Ogun |
| 5850 | OG/0230 | OG/0230/S/4  | Micoson Pharmaceuticals                    |                                                   | 1, Ijoko Road,Sango-Ota Ogun State                                                       | Ado Odo-Ota    | Ogun |
| 5851 | OG/0231 | OG/0231/S/13 | Catholic Optical Outreaches                |                                                   | 28,Awokoya Street Ijebu-Ode Ogun State                                                   | Ijebu Ode      | Ogun |
| 5852 | OG/0232 | OG/0232/S/1  | Mike Medics Hospital                       |                                                   | Aduba Estate, Akinbo Off Ijoko Road ,Akute Ogunn State                                   | Ifo            | Ogun |
| 5853 | OG/0233 | OG/0233/S/3  | St. Michael-Israel Specialist Hospital LTD |                                                   | 50,Awujale Street, Itale, Ijebu-Ode Ogun State                                           | Ijebu Ode      | Ogun |
| 5854 | OG/0233 | OG/0233/S/1  | St. Michael-Israel Specialist Hospital LTD |                                                   | 50,Awujale Street, Itale, Ijebu-Ode Ogun State                                           | Ijebu Ode      | Ogun |
| 5855 | OG/0235 | OG/0235/S/15 | Elohim Eye Specialist                      |                                                   | 20,Abiola Way, Abeokuta Ogun State                                                       | Abeokuta South | Ogun |
| 5856 | OG/0236 | OG/0236/S/1  | Pillars Specialist Clinic                  |                                                   | 136,Akarigbo Road,Ijoku, Opp.First Bank Plc                                              | Sagamu         | Ogun |
| 5857 | OG/0236 | OG/0236/S/3  | Pillars Specialist Clinic                  |                                                   | 136,Akarigbo Road,Ijoku, Opp.First Bank Plc                                              | Sagamu         | Ogun |
| 5858 | OG/0237 | OG/0237/S/1  | Mcperson University Health Centre          |                                                   | Km 96, Lagos-Ibadan Expressway,Senki-Sotayo, Village Ogun State                          | Obafemi/Owode  | Ogun |
| 5859 | OG/0240 | OG/0240/S/1  | Ojugbele Specialist Hospital               |                                                   | 105,Idiroko Road, Oju-Ore Ogun State                                                     | Ado Odo-Ota    | Ogun |
| 5860 | OG/0241 | OG/0241/S/4  | State Hospital Isara-Remo                  |                                                   | Oke-Oja, Isara-Remo,Ogun State                                                           | Remo North     | Ogun |
| 5861 | OG/0241 | OG/0241/S/3  | State Hospital Isara-Remo                  |                                                   | Oke-Oja, Isara-Remo,Ogun State                                                           | Remo North     | Ogun |
| 5862 | OG/0241 | OG/0241/S/5  | State Hospital Isara-Remo                  |                                                   | Oke-Oja, Isara-Remo,Ogun State                                                           | Remo North     | Ogun |

|      |         |              |                                               |          |                                                                                  |                |      |
|------|---------|--------------|-----------------------------------------------|----------|----------------------------------------------------------------------------------|----------------|------|
| 5863 | OG/0243 | OG/0243/S/10 | Faith Specialist Hospital                     |          | Plot 5,block 11,Ogun State Housing Corporation, Onipanu Quarters Ogun State      | Ifo            | Ogun |
| 5864 | OG/0244 | OG/0244/S/3  | Jon-Fem Hospital LTD and Maternity Home       |          | 63, Akeja Street, Off Anglican Road, Ilo Ifako Sango-Ota, Ogun State             | Ado Odo-Ota    | Ogun |
| 5865 | OG/0244 | OG/0244/S/10 | Jon-Fem Hospital LTD and Maternity Home       |          | 63, Akeja Street, Off Anglican Road, Ilo Ifako Sango-Ota, Ogun State             | Ado Odo-Ota    | Ogun |
| 5866 | OG/0246 | OG/0246/S/1  | Angels & Eagle Specialist Hospital            |          | 9b Sikiru Jimoh Street, Beside Wemby Suites, GRA, Ibara, Abeokuta Ogun State     | Abeokuta South | Ogun |
| 5867 | OG/0246 | OG/0246/S/6  | Angels & Eagle Specialist Hospital            |          | 9b Sikiru Jimoh Street, Beside Wemby Suites, GRA, Ibara, Abeokuta Ogun State     | Abeokuta South | Ogun |
| 5868 | OG/0246 | OG/0246/S/4  | Angels & Eagle Specialist Hospital            |          | 9b Sikiru Jimoh Street, Beside Wemby Suites, GRA, Ibara, Abeokuta Ogun State     | Abeokuta South | Ogun |
| 5869 | OG/0246 | OG/0246/S/3  | Angels & Eagle Specialist Hospital            |          | 9b Sikiru Jimoh Street, Beside Wemby Suites, GRA, Ibara, Abeokuta Ogun State     | Abeokuta South | Ogun |
| 5870 | OG/0246 | OG/0246/S/11 | Angels & Eagle Specialist Hospital            |          | 9b Sikiru Jimoh Street, Beside Wemby Suites, GRA, Ibara, Abeokuta Ogun State     | Abeokuta South | Ogun |
| 5871 | OG/0246 | OG/0246/S/5  | Angels & Eagle Specialist Hospital            |          | 9b Sikiru Jimoh Street, Beside Wemby Suites, GRA, Ibara, Abeokuta Ogun State     | Abeokuta South | Ogun |
| 5872 | OG/0249 | OG/0249/S/7  | TBK Rainbow Medical Diagnostic Ltd            |          | OGS Plaza, 30 Akure Road, Ajuwon Bus Stop, Ajuwon Ogun State                     | Ifo            | Ogun |
| 5873 | OG/0249 | OG/0249/S/5  | TBK Rainbow Medical Diagnostic Ltd            |          | OGS Plaza, 30 Akure Road, Ajuwon Bus Stop, Ajuwon Ogun State                     | Ifo            | Ogun |
| 5874 | OG/0252 | OG/0252/S/3  | The Unique Great Shepherd Specialist Hospital |          | 1,Olujide Somolu Rd., Opposite Fire Service HQRS., Onikoko, Abeokuta, Ogun State | Obafemi/Owode  | Ogun |
| 5875 | OG/0258 | OG/0258/S/2  | O & A Medical Centre                          |          | 3, Asero Housing Estate,Asero Abeokuta. Ogun State                               | Abeokuta South | Ogun |
| 5876 | OG/0258 | OG/0258/S/3  | O & A Medical Centre                          |          | 3, Asero Housing Estate,Asero Abeokuta. Ogun State                               | Abeokuta South | Ogun |
| 5877 | OG/0263 | OG/0263/S/1  | Bliss Hospital                                |          | 127,Akarigbo Street,Ijoku, Sagamu,Ogun State                                     | Sagamu         | Ogun |
| 5878 | OG/0263 | OG/0263/S/3  | Bliss Hospital                                |          | 127,Akarigbo Street,Ijoku, Sagamu,Ogun State                                     | Sagamu         | Ogun |
| 5879 | OS/0002 | OS/0002/S/4  | Samtad Pharmacy                               | Pharmacy | Kutupe-basse, Sabo Quarters, Ikire                                               | Ayedaade       | Osun |
| 5880 | OS/0011 | OS/0011/S/4  | Kike Lomo Pharmacy                            | Pharmacy | Ilesha                                                                           | Ilesa East     | Osun |
| 5881 | OS/0012 | OS/0012/S/4  | Fola Saveway Pharmacy                         | Pharmacy | Bi 91, Okesa Street, Opp. Ilesa Grammar Sch., Ilesha                             | Ilesa East     | Osun |
| 5882 | OS/0013 | OS/0013/S/4  | Ibukun Oluwa Chemists                         | Pharmacy | A, 50, Sale Aje Street Ipetu modu                                                | Ife South      | Osun |
| 5883 | OS/0014 | OS/0014/S/3  | Klm Muslim Hospital                           |          | Feesu Road, Iwo                                                                  | Iwo            | Osun |
| 5884 | OS/0014 | OS/0014/S/1  | Klm Muslim Hospital                           |          | Feesu Road, Iwo                                                                  | Iwo            | Osun |
| 5885 | OS/0018 | OS/0018/S/3  | Biket Medical Centre                          |          | Off Kuyi Square, Osogbo-Ikirun Road                                              | Olorunda       | Osun |
| 5886 | OS/0018 | OS/0018/S/14 | Biket Medical Centre                          |          | Off Kuyi Square, Osogbo-Ikirun Road                                              | Olorunda       | Osun |
| 5887 | OS/0018 | OS/0018/S/7  | Biket Medical Centre                          |          | Off Kuyi Square, Osogbo-Ikirun Road                                              | Olorunda       | Osun |
| 5888 | OS/0018 | OS/0018/S/2  | Biket Medical Centre                          |          | Off Kuyi Square, Osogbo-Ikirun Road                                              | Olorunda       | Osun |
| 5889 | OS/0018 | OS/0018/S/1  | Biket Medical Centre                          |          | Off Kuyi Square, Osogbo-Ikirun Road                                              | Olorunda       | Osun |
| 5890 | OS/0018 | OS/0018/S/5  | Biket Medical Centre                          |          | Off Kuyi Square, Osogbo-Ikirun Road                                              | Olorunda       | Osun |
| 5891 | OS/0021 | OS/0021/S/1  | Ladoke Akintola Teaching Hospital             |          | Osogbo                                                                           | Osogbo         | Osun |
| 5892 | OS/0021 | OS/0021/S/11 | Ladoke Akintola Teaching Hospital             |          | Osogbo                                                                           | Osogbo         | Osun |
| 5893 | OS/0021 | OS/0021/S/6  | Ladoke Akintola Teaching Hospital             |          | Osogbo                                                                           | Osogbo         | Osun |
| 5894 | OS/0021 | OS/0021/S/3  | Ladoke Akintola Teaching Hospital             |          | Osogbo                                                                           | Osogbo         | Osun |
| 5895 | OS/0021 | OS/0021/S/2  | Ladoke Akintola Teaching Hospital             |          | Osogbo                                                                           | Osogbo         | Osun |
| 5896 | OS/0021 | OS/0021/S/10 | Ladoke Akintola Teaching Hospital             |          | Osogbo                                                                           | Osogbo         | Osun |



|      |         |              |                                                 |          |                                              |             |      |
|------|---------|--------------|-------------------------------------------------|----------|----------------------------------------------|-------------|------|
| 5897 | OS/0022 | OS/0022/S/1  | Abake Medical Centre                            |          | Odiolowo, Osogbo                             | Osogbo      | Osun |
| 5898 | OS/0030 | OS/0030/S/4  | Ife Olu Chemist & Supermarket                   | Pharmacy | 20 Alekuwodu Rd., Okefia Osogbo              | Osogbo      | Osun |
| 5899 | OS/0040 | OS/0040/S/2  | Obafemi Awolowo Teaching Hospital               |          | Ile-Ife/Ilesha                               | Ife Central | Osun |
| 5900 | OS/0040 | OS/0040/S/6  | Obafemi Awolowo Teaching Hospital               |          | Ile-Ife/Ilesha                               | Ife Central | Osun |
| 5901 | OS/0040 | OS/0040/S/10 | Obafemi Awolowo Teaching Hospital               |          | Ile-Ife/Ilesha                               | Ife Central | Osun |
| 5902 | OS/0040 | OS/0040/S/3  | Obafemi Awolowo Teaching Hospital               |          | Ile-Ife/Ilesha                               | Ife Central | Osun |
| 5903 | OS/0040 | OS/0040/S/1  | Obafemi Awolowo Teaching Hospital               |          | Ile-Ife/Ilesha                               | Ife Central | Osun |
| 5904 | OS/0041 | OS/0041/S/8  | Adenle Memorial Hospital                        |          | Ilesha                                       | Ilesa East  | Osun |
| 5905 | OS/0042 | OS/0042/S/4  | Adetola Pharmacy Ltd.                           | Pharmacy | No.7, Alafia Str. Off Aiye Toro Str., Osohbo | Olorunda    | Osun |
| 5906 | OS/0050 | OS/0050/S/19 | Obafemi Awolowo University Health Centre        |          | Ile-Ife, Osun State                          | Ife Central | Osun |
| 5907 | OS/0050 | OS/0050/S/6  | Obafemi Awolowo University Health Centre        |          | Ile-Ife, Osun State                          | Ife Central | Osun |
| 5908 | OS/0050 | OS/0050/S/2  | Obafemi Awolowo University Health Centre        |          | Ile-Ife, Osun State                          | Ife Central | Osun |
| 5909 | OS/0050 | OS/0050/S/10 | Obafemi Awolowo University Health Centre        |          | Ile-Ife, Osun State                          | Ife Central | Osun |
| 5910 | OS/0050 | OS/0050/S/5  | Obafemi Awolowo University Health Centre        |          | Ile-Ife, Osun State                          | Ife Central | Osun |
| 5911 | OS/0050 | OS/0050/S/3  | Obafemi Awolowo University Health Centre        |          | Ile-Ife, Osun State                          | Ife Central | Osun |
| 5912 | OS/0050 | OS/0050/S/4  | Obafemi Awolowo University Health Centre        |          | Ile-Ife, Osun State                          | Ife Central | Osun |
| 5913 | OS/0050 | OS/0050/S/1  | Obafemi Awolowo University Health Centre        |          | Ile-Ife, Osun State                          | Ife Central | Osun |
| 5914 | OS/0053 | OS/0053/S/15 | Onward Specialist Hospital                      |          | Agunbelewo Ilobu Road, Oshogbo               | Olorunda    | Osun |
| 5915 | OS/0053 | OS/0053/S/1  | Onward Specialist Hospital                      |          | Agunbelewo Ilobu Road, Oshogbo               | Olorunda    | Osun |
| 5916 | OS/0053 | OS/0053/S/5  | Onward Specialist Hospital                      |          | Agunbelewo Ilobu Road, Oshogbo               | Olorunda    | Osun |
| 5917 | OS/0053 | OS/0053/S/4  | Onward Specialist Hospital                      |          | Agunbelewo Ilobu Road, Oshogbo               | Olorunda    | Osun |
| 5918 | OS/0053 | OS/0053/S/7  | Onward Specialist Hospital                      |          | Agunbelewo Ilobu Road, Oshogbo               | Olorunda    | Osun |
| 5919 | OS/0053 | OS/0053/S/3  | Onward Specialist Hospital                      |          | Agunbelewo Ilobu Road, Oshogbo               | Olorunda    | Osun |
| 5920 | OS/0058 | OS/0058/S/3  | Police Clinics, Osun                            |          | Osun State                                   | Ede South   | Osun |
| 5921 | OS/0058 | OS/0058/S/1  | Police Clinics, Osun                            |          | Osun State                                   | Ede South   | Osun |
| 5922 | OS/0058 | OS/0058/S/2  | Police Clinics, Osun                            |          | Osun State                                   | Ede South   | Osun |
| 5923 | OS/0061 | OS/0061/S/1  | Seventh Day Adventist Hospital                  |          | LAGERE RD,ILE-IFE                            | Ife Central | Osun |
| 5924 | OS/0061 | OS/0061/S/7  | Seventh Day Adventist Hospital                  |          | LAGERE RD,ILE-IFE                            | Ife Central | Osun |
| 5925 | OS/0061 | OS/0061/S/2  | Seventh Day Adventist Hospital                  |          | LAGERE RD,ILE-IFE                            | Ife Central | Osun |
| 5926 | OS/0061 | OS/0061/S/6  | Seventh Day Adventist Hospital                  |          | LAGERE RD,ILE-IFE                            | Ife Central | Osun |
| 5927 | OS/0061 | OS/0061/S/10 | Seventh Day Adventist Hospital                  |          | LAGERE RD,ILE-IFE                            | Ife Central | Osun |
| 5928 | OS/0061 | OS/0061/S/12 | Seventh Day Adventist Hospital                  |          | LAGERE RD,ILE-IFE                            | Ife Central | Osun |
| 5929 | OS/0061 | OS/0061/S/11 | Seventh Day Adventist Hospital                  |          | LAGERE RD,ILE-IFE                            | Ife Central | Osun |
| 5930 | OS/0061 | OS/0061/S/5  | Seventh Day Adventist Hospital                  |          | LAGERE RD,ILE-IFE                            | Ife Central | Osun |
| 5931 | OS/0061 | OS/0061/S/4  | Seventh Day Adventist Hospital                  |          | LAGERE RD,ILE-IFE                            | Ife Central | Osun |
| 5932 | OS/0061 | OS/0061/S/3  | Seventh Day Adventist Hospital                  |          | LAGERE RD,ILE-IFE                            | Ife Central | Osun |
| 5933 | OS/0062 | OS/0062/S/2  | Our Lady of Fatima Catholic Hospital (Jaleyemi) |          | ODI-OLOWO,OSOGBO                             | Osogbo      | Osun |
| 5934 | OS/0062 | OS/0062/S/14 | Our Lady of Fatima Catholic Hospital (Jaleyemi) |          | ODI-OLOWO,OSOGBO                             | Osogbo      | Osun |
| 5935 | OS/0062 | OS/0062/S/4  | Our Lady of Fatima Catholic Hospital (Jaleyemi) |          | ODI-OLOWO,OSOGBO                             | Osogbo      | Osun |
| 5936 | OS/0062 | OS/0062/S/5  | Our Lady of Fatima Catholic Hospital (Jaleyemi) |          | ODI-OLOWO,OSOGBO                             | Osogbo      | Osun |

|      |         |              |                                                   |                                           |                                                                  |             |      |
|------|---------|--------------|---------------------------------------------------|-------------------------------------------|------------------------------------------------------------------|-------------|------|
| 5937 | OS/0062 | OS/0062/S/7  | Our Lady of Fatima Catholic Hospital (Jaleyemi)   |                                           | ODI-OLOWO, OSOGBO                                                | Osogbo      | Osun |
| 5938 | OS/0062 | OS/0062/S/3  | Our Lady of Fatima Catholic Hospital (Jaleyemi)   |                                           | ODI-OLOWO, OSOGBO                                                | Osogbo      | Osun |
| 5939 | OS/0066 | OS/0066/S/1  | Ronbay Hospital & Maternity                       |                                           | TALAFIA IMAM STR, BEHIND FED. POLY EDE                           | Ede South   | Osun |
| 5940 | OS/0067 | OS/0067/S/1  | Life Fountain Specialist Hospital                 |                                           | 6 OLAFARE BIOBAKU STR. PARAKIN                                   | Ife Central | Osun |
| 5941 | OS/0068 | OS/0068/S/1  | St. Victoria Specialist Hospital                  |                                           | OPP NTA MOKURO RD, ILE-IFE                                       | Ife Central | Osun |
| 5942 | OS/0070 | OS/0070/S/1  | EBENEZER SPECIALIST HOSP.                         |                                           | 17 STATION RD, OSOGBO                                            | Osogbo      | Osun |
| 5943 | OS/0071 | OS/0071/S/1  | BALM OF GILEAD SPEC. HOSPITAL                     |                                           | OKE-OPO GRA ILESHA                                               | Ilesa East  | Osun |
| 5944 | OS/0072 | OS/0072/S/5  | St. Jude's Hospital                               |                                           | OFF FATIMA COLLEGE RD, LAAKOSIN IKIRE                            | Irewole     | Osun |
| 5945 | OS/0072 | OS/0072/S/4  | St. Jude's Hospital                               |                                           | OFF FATIMA COLLEGE RD, LAAKOSIN IKIRE                            | Irewole     | Osun |
| 5946 | OS/0072 | OS/0072/S/3  | St. Jude's Hospital                               |                                           | OFF FATIMA COLLEGE RD, LAAKOSIN IKIRE                            | Irewole     | Osun |
| 5947 | OS/0072 | OS/0072/S/7  | St. Jude's Hospital                               |                                           | OFF FATIMA COLLEGE RD, LAAKOSIN IKIRE                            | Irewole     | Osun |
| 5948 | OS/0072 | OS/0072/S/1  | St. Jude's Hospital                               |                                           | OFF FATIMA COLLEGE RD, LAAKOSIN IKIRE                            | Irewole     | Osun |
| 5949 | OS/0077 | OS/0077/S/4  | JOSTAD CHEMISTS                                   | Pharmacy                                  | A2, EREJA SQUARE, RISAWE'S COMPOUND, ILESA                       | Ilesa West  | Osun |
| 5950 | OS/0082 | OS/0082/S/5  | OROKI HOSPITAL                                    | Radiology                                 | 27 CEMENTRY RD, IGBONNA OSOGBO                                   | Olorunda    | Osun |
| 5951 | OS/0082 | OS/0082/S    | OROKI HOSPITAL                                    | Radiology                                 | 27 CEMENTRY RD, IGBONNA OSOGBO                                   | Olorunda    | Osun |
| 5952 | OS/0088 | OS/0088/S/1  | Our Lady of Lourdes Catholic Hospital & Maternity |                                           | Parde Road, Ipetumodu                                            | Ife North   | Osun |
| 5953 | OS/0088 | OS/0088/S/15 | Our Lady of Lourdes Catholic Hospital & Maternity |                                           | Parde Road, Ipetumodu                                            | Ife North   | Osun |
| 5954 | OS/0088 | OS/0088/S/3  | Our Lady of Lourdes Catholic Hospital & Maternity |                                           | Parde Road, Ipetumodu                                            | Ife North   | Osun |
| 5955 | OS/0088 | OS/0088/S/5  | Our Lady of Lourdes Catholic Hospital & Maternity |                                           | Parde Road, Ipetumodu                                            | Ife North   | Osun |
| 5956 | OS/0088 | OS/0088/S/4  | Our Lady of Lourdes Catholic Hospital & Maternity |                                           | Parde Road, Ipetumodu                                            | Ife North   | Osun |
| 5957 | OS/0088 | OS/0088/S/14 | Our Lady of Lourdes Catholic Hospital & Maternity |                                           | Parde Road, Ipetumodu                                            | Ife North   | Osun |
| 5958 | OS/0090 | OS/0090/S/3  | Victory Hospital                                  | O&G                                       | 1 Olumodan Deubi Camp, Iyalode Street off Feasu Road Iwo         | Iwo         | Osun |
| 5959 | OS/0091 | OS/0091/S/1  | Morning Star Medical Centre                       |                                           | 10, Oyetunde Street, Alekuwodo, Osogbo                           | Osogbo      | Osun |
| 5960 | OS/0091 | OS/0091/S/3  | Morning Star Medical Centre                       |                                           | 10, Oyetunde Street, Alekuwodo, Osogbo                           | Osogbo      | Osun |
| 5961 | OS/0092 | OS/0092/S/3  | Apex Medical Centre                               |                                           | 133 Ibadan Road, Ile Ife                                         | Ife Central | Osun |
| 5962 | OS/0092 | OS/0092/S/1  | Apex Medical Centre                               |                                           | 133 Ibadan Road, Ile Ife                                         | Ife Central | Osun |
| 5963 | OS/0094 | OS/0094/S/2  | Oke-Ola Catholic Hospital                         | Internal Medicine, O & G, General Surgery | Oke-Ola Apomu, Isokan District                                   | Isokan      | Osun |
| 5964 | OS/0094 | OS/0094/S/1  | Oke-Ola Catholic Hospital                         | Internal Medicine, O & G, General Surgery | Oke-Ola Apomu, Isokan District                                   | Isokan      | Osun |
| 5965 | OS/0094 | OS/0094/S/3  | Oke-Ola Catholic Hospital                         | Internal Medicine, O & G, General Surgery | Oke-Ola Apomu, Isokan District                                   | Isokan      | Osun |
| 5966 | OS/0098 | OS/0098/S/1  | Demal Clinic                                      |                                           | # 30, Kola Adetunji Street, Oke Ijetu Ilesa Garage Area, Oshogbo | Osogbo      | Osun |
| 5967 | OS/0098 | OS/0098/S/3  | Demal Clinic                                      |                                           | # 30, Kola Adetunji Street, Oke Ijetu Ilesa Garage Area, Oshogbo | Osogbo      | Osun |
| 5968 | OS/0099 | OS/0099/S/3  | Living Hope Hospital                              |                                           | Parakin obalufe Layout, Osun state                               | Ife Central | Osun |
| 5969 | OS/0100 | OS/0100/S/3  | Anu-Olu Hospital and Maternity                    |                                           | 1, Alh Wahab Salami Str, Agip Area, Ede                          | Ede South   | Osun |
| 5970 | OS/0100 | OS/0100/S/1  | Anu-Olu Hospital and Maternity                    |                                           | 1, Alh Wahab Salami Str, Agip Area, Ede                          | Ede South   | Osun |
| 5971 | OS/0103 | OS/0103/S/3  | Spring Hope Specialist Hospital                   |                                           | Spring House, Old Ikirun Road, Oshogbo, Osun State               | Olorunda    | Osun |

|      |         |              |                                                   |  |                                                                                  |             |      |
|------|---------|--------------|---------------------------------------------------|--|----------------------------------------------------------------------------------|-------------|------|
| 5972 | OS/0106 | OS/0106/S/3  | Emmanuel Medical Centre                           |  | 8 Deborah Oladogun Street Oshogbo                                                | Osogbo      | Osun |
| 5973 | OS/0106 | OS/0106/S/1  | Emmanuel Medical Centre                           |  | 8 Deborah Oladogun Street Oshogbo                                                | Osogbo      | Osun |
| 5974 | OS/0106 | OS/0106/S/2  | Emmanuel Medical Centre                           |  | 8 Deborah Oladogun Street Oshogbo                                                | Osogbo      | Osun |
| 5975 | OS/0106 | OS/0106/S/6  | Emmanuel Medical Centre                           |  | 8 Deborah Oladogun Street Oshogbo                                                | Osogbo      | Osun |
| 5976 | OS/0107 | OS/0107/S/3  | Ayomide Women's Health Specialist Hospital        |  | 30 Powerline, Ikirun Road, Osogbo, Osun State.                                   | Osogbo      | Osun |
| 5977 | OS/0108 | OS/0108/S/3  | Hamstring Specialist Hospital & Diagnostic Centre |  | Isiah Okunola Street, off Okinni Grammer School, Okinni, Oshogbo                 | Egbedore    | Osun |
| 5978 | OS/0110 | OS/0110/S/3  | Victory Point Hospital                            |  | Ojoda New Town, Ile-idande, Osogbo, Osun State.                                  | Olorunda    | Osun |
| 5979 | OS/0111 | OS/0111/S/3  | Ultimate Specialist Hospital                      |  | No. 179 Fajuyi Road, Ile- Ife Osun State.                                        | Ife Central | Osun |
| 5980 | OS/0113 | OS/0113/S/1  | Living Hope Medical Centre                        |  | No. 26 Fola Aliu Street, Boripe Community, Rinsayo Area, Osogbo Osun State.      | Egbedore    | Osun |
| 5981 | OS/0113 | OS/0113/S/2  | Living Hope Medical Centre                        |  | No. 26 Fola Aliu Street, Boripe Community, Rinsayo Area, Osogbo Osun State.      | Egbedore    | Osun |
| 5982 | OS/0113 | OS/0113/S/3  | Living Hope Medical Centre                        |  | No. 26 Fola Aliu Street, Boripe Community, Rinsayo Area, Osogbo Osun State.      | Egbedore    | Osun |
| 5983 | OS/0118 | OS/0118/S/3  | Dunafort Hospital & Laboratory Services           |  | Tinumola Area, Osogbo Osun State                                                 | Osogbo      | Osun |
| 5984 | OS/0118 | OS/0118/S/1  | Dunafort Hospital & Laboratory Services           |  | Tinumola Area, Osogbo Osun State                                                 | Osogbo      | Osun |
| 5985 | OS/0119 | OS/0119/S/5  | Goodness & Mercy Specialist Hospital              |  | Christ life Centre, Ofatedo, Osogbo Osun State.                                  | Egbedore    | Osun |
| 5986 | OS/0119 | OS/0119/S/1  | Goodness & Mercy Specialist Hospital              |  | Christ life Centre, Ofatedo, Osogbo Osun State.                                  | Egbedore    | Osun |
| 5987 | OS/0119 | OS/0119/S/3  | Goodness & Mercy Specialist Hospital              |  | Christ life Centre, Ofatedo, Osogbo Osun State.                                  | Egbedore    | Osun |
| 5988 | OS/0121 | OS/0121/S/12 | Emmanuel Specialist's Hospital                    |  | E27 Obayemi Street, Agborogboro Layout, Oranfe, Ilesha Road, Ile Ife Osun State. | Ife East    | Osun |
| 5989 | OS/0121 | OS/0121/S/3  | Emmanuel Specialist's Hospital                    |  | E27 Obayemi Street, Agborogboro Layout, Oranfe, Ilesha Road, Ile Ife Osun State. | Ife East    | Osun |
| 5990 | OS/0121 | OS/0121/S/1  | Emmanuel Specialist's Hospital                    |  | E27 Obayemi Street, Agborogboro Layout, Oranfe, Ilesha Road, Ile Ife Osun State. | Ife East    | Osun |
| 5991 | OS/0121 | OS/0121/S/18 | Emmanuel Specialist's Hospital                    |  | E27 Obayemi Street, Agborogboro Layout, Oranfe, Ilesha Road, Ile Ife Osun State. | Ife East    | Osun |
| 5992 | OS/0125 | OS/0125/S/15 | Jola-Olu Specialist Hospital                      |  | Agunbelewo Ilobu Road, P.O. Box 979, Osogbo Osun State.                          | Egbedore    | Osun |
| 5993 | OS/0127 | OS/0127/S/8  | Flourish Dental Clinic                            |  | 5, Olanire Crescent, Behind Bovas Petrol Station Osogbo Osun State               | Osogbo      | Osun |
| 5994 | OS/0128 | OS/0128/S/8  | Flourish Dental Clinic                            |  | 5, Olanire Crescent, Behind Bovas Petrol Station Osogbo Osun State               | Osogbo      | Osun |
| 5995 | OS/0130 | OS/0130/S/3  | Alpha Hospital & Maternity Home                   |  | 9 Adetoro Street, Near Moricaz Mosque, Ede Osun State                            | Ede South   | Osun |
| 5996 | OS/0135 | OS/0135/S/7  | Mannabat Medical Centre                           |  | Opp. Old Tajudeen School, Off Sawmill Road, Ido-osun                             | Egbedore    | Osun |
| 5997 | OS/0135 | OS/0135/S/5  | Mannabat Medical Centre                           |  | Opp. Old Tajudeen School, Off Sawmill Road, Ido-osun                             | Egbedore    | Osun |
| 5998 | OS/0139 | OS/0139/S/1  | BWB Hospital                                      |  | No.5 orisumbare Street, Kasmu Area, Oke-baale, Osogbo Osun State                 | Osogbo      | Osun |
| 5999 | OS/0140 | OS/0140/S/12 | Rehoboth Ear, Nose and Throat Hospital            |  | Tajudeen Suleiman Street, Zone3, Behind M-Oyetunji Filling Station, Capital      | Osogbo      | Osun |
| 6000 | OS/0141 | OS/0141/S/3  | Oke-baale Central Hospital                        |  | Opp. Okebaale Police Station, Okebaale, Osogbo Osun State                        | Osogbo      | Osun |

|      |         |              |                                           |                   |                                                                   |                   |      |
|------|---------|--------------|-------------------------------------------|-------------------|-------------------------------------------------------------------|-------------------|------|
| 6001 | OS/0142 | OS/0142/S/3  | Safe Parturition (SP) Specialist Hospital |                   | 6, Abiodun Adeshina Street, Behind GOF Schools, Osogbo Osun State | Osogbo            | Osun |
| 6002 | OY/0001 | OY/0001/S/7  | University College Hospital               |                   | Ibadan                                                            | Ibadan North      | Oyo  |
| 6003 | OY/0001 | OY/0001/S/11 | University College Hospital               |                   | Ibadan                                                            | Ibadan North      | Oyo  |
| 6004 | OY/0001 | OY/0001/S/15 | University College Hospital               |                   | Ibadan                                                            | Ibadan North      | Oyo  |
| 6005 | OY/0001 | OY/0001/S/5  | University College Hospital               |                   | Ibadan                                                            | Ibadan North      | Oyo  |
| 6006 | OY/0001 | OY/0001/S/4  | University College Hospital               |                   | Ibadan                                                            | Ibadan North      | Oyo  |
| 6007 | OY/0003 | OY/0003/S/2  | Tobi Medical Centre Ltd.                  |                   | 57/453 Felele Layout, Ibadan                                      | Ibadan North      | Oyo  |
| 6008 | OY/0003 | OY/0003/S/5  | Tobi Medical Centre Ltd.                  |                   | 57/453 Felele Layout, Ibadan                                      | Ibadan North      | Oyo  |
| 6009 | OY/0003 | OY/0003/S/9  | Tobi Medical Centre Ltd.                  |                   | 57/453 Felele Layout, Ibadan                                      | Ibadan North      | Oyo  |
| 6010 | OY/0003 | OY/0003/S/6  | Tobi Medical Centre Ltd.                  |                   | 57/453 Felele Layout, Ibadan                                      | Ibadan North      | Oyo  |
| 6011 | OY/0003 | OY/0003/S/3  | Tobi Medical Centre Ltd.                  |                   | 57/453 Felele Layout, Ibadan                                      | Ibadan North      | Oyo  |
| 6012 | OY/0005 | OY/0005/S/1  | Badejoko Memorial Hospital                |                   | Oremeji Mokola Opp. Premier, Hotel Junction, Ibadan               | Ibadan North      | Oyo  |
| 6013 | OY/0005 | OY/0005/S/5  | Badejoko Memorial Hospital                |                   | Oremeji Mokola Opp. Premier, Hotel Junction, Ibadan               | Ibadan North      | Oyo  |
| 6014 | OY/0005 | OY/0005/S/2  | Badejoko Memorial Hospital                |                   | Oremeji Mokola Opp. Premier, Hotel Junction, Ibadan               | Ibadan North      | Oyo  |
| 6015 | OY/0005 | OY/0005/S/3  | Badejoko Memorial Hospital                |                   | Oremeji Mokola Opp. Premier, Hotel Junction, Ibadan               | Ibadan North      | Oyo  |
| 6016 | OY/0009 | OY/0009/S/1  | Adeoye Memorial Specialist Hospital       |                   | Nw/ 4/185 George Street, Ibadan                                   | Ibadan North      | Oyo  |
| 6017 | OY/0009 | OY/0009/S/5  | Adeoye Memorial Specialist Hospital       |                   | Nw/ 4/185 George Street, Ibadan                                   | Ibadan North      | Oyo  |
| 6018 | OY/0010 | OY/0010/S/1  | Mobolaji Hospital                         |                   | 43, Obafemi Awolowo Way, Oke-Bola, Ibadan                         | Ibadan North      | Oyo  |
| 6019 | OY/0010 | OY/0010/S/14 | Mobolaji Hospital                         |                   | 43, Obafemi Awolowo Way, Oke-Bola, Ibadan                         | Ibadan North      | Oyo  |
| 6020 | OY/0010 | OY/0010/S/3  | Mobolaji Hospital                         |                   | 43, Obafemi Awolowo Way, Oke-Bola, Ibadan                         | Ibadan North      | Oyo  |
| 6021 | OY/0011 | OY/0011/S/2  | Idi-Ape Medical Centre                    |                   | Plot 2 & 6, Afolabi Layout Idi-Ape, Ibadan                        | Ibadan North      | Oyo  |
| 6022 | OY/0012 | OY/0012/S/1  | Eyiolawi (Iyolawi) Memorial Hospital      |                   | Opp. Islamic High School, Orita Bashanu, Ibadan                   | Ibadan North      | Oyo  |
| 6023 | OY/0014 | OY/0014/S/2  | Lanark Specialist Hospital                |                   | Sw9/1423, State Hospital Road, Ring Road Area, Ibadan             | Ibadan North East | Oyo  |
| 6024 | OY/0014 | OY/0014/S/4  | Lanark Specialist Hospital                |                   | Sw9/1423, State Hospital Road, Ring Road Area, Ibadan             | Ibadan North East | Oyo  |
| 6025 | OY/0014 | OY/0014/S/1  | Lanark Specialist Hospital                |                   | Sw9/1423, State Hospital Road, Ring Road Area, Ibadan             | Ibadan North East | Oyo  |
| 6026 | OY/0014 | OY/0014/S/5  | Lanark Specialist Hospital                |                   | Sw9/1423, State Hospital Road, Ring Road Area, Ibadan             | Ibadan North East | Oyo  |
| 6027 | OY/0015 | OY/0015/S/3  | Christus Special Hospital                 |                   | Zion Building, Kayode Obenbe, Crescent, New Ire Road, Ibadan      | Ibadan North      | Oyo  |
| 6028 | OY/0017 | OY/0017/S/5  | Skyline Specialist Clinic                 | Laboratory, O & G | Dugbe, Ibadan                                                     | Ibadan North East | Oyo  |
| 6029 | OY/0017 | OY/0017/S/3  | Skyline Specialist Clinic                 | Laboratory, O & G | Dugbe, Ibadan                                                     | Ibadan North East | Oyo  |
| 6030 | OY/0020 | OY/0020/S/5  | Alafia Medical Laboratory Services        | Laboratory        | Premier Club Close, Owode, Oyo, Oyo State                         | Ibadan North      | Oyo  |
| 6031 | OY/0028 | OY/0028/S/3  | Lade Hospital & Maternity                 |                   | SW 1171b Agege, Ibadan                                            | Ibadan South West | Oyo  |
| 6032 | OY/0028 | OY/0028/S/6  | Lade Hospital & Maternity                 |                   | SW 1171b Agege, Ibadan                                            | Ibadan South West | Oyo  |
| 6033 | OY/0028 | OY/0028/S/1  | Lade Hospital & Maternity                 |                   | SW 1171b Agege, Ibadan                                            | Ibadan South West | Oyo  |
| 6034 | OY/0028 | OY/0028/S/2  | Lade Hospital & Maternity                 |                   | SW 1171b Agege, Ibadan                                            | Ibadan South West | Oyo  |
| 6035 | OY/0031 | OY/0031/S/3  | The Vine Hospital & Maternity Centre      |                   | Block 10 Plot 24, Alafin Avenue, Oluyole Extension, Ibadan        | Ibadan South West | Oyo  |
| 6036 | OY/0031 | OY/0031/S/1  | The Vine Hospital & Maternity Centre      |                   | Block 10 Plot 24, Alafin Avenue, Oluyole Extension, Ibadan        | Ibadan South West | Oyo  |
| 6037 | OY/0032 | OY/0032/S/7  | Oke-Ado Hospital                          |                   | SW7/217, Ibukun Olu Street, Oke Ado, Ibadan                       | Ibadan South West | Oyo  |
| 6038 | OY/0032 | OY/0032/S/1  | Oke-Ado Hospital                          |                   | SW7/217, Ibukun Olu Street, Oke Ado, Ibadan                       | Ibadan South West | Oyo  |

|      |         |              |                                   |                                                         |                                                             |                   |     |
|------|---------|--------------|-----------------------------------|---------------------------------------------------------|-------------------------------------------------------------|-------------------|-----|
| 6039 | OY/0032 | OY/0032/S/3  | Oke-Ado Hospital                  |                                                         | SW7/217, Ibukun Olu Street, Oke Ado, Ibadan                 | Ibadan South West | Oyo |
| 6040 | OY/0032 | OY/0032/S/6  | Oke-Ado Hospital                  |                                                         | SW7/217, Ibukun Olu Street, Oke Ado, Ibadan                 | Ibadan South West | Oyo |
| 6041 | OY/0032 | OY/0032/S/5  | Oke-Ado Hospital                  |                                                         | SW7/217, Ibukun Olu Street, Oke Ado, Ibadan                 | Ibadan South West | Oyo |
| 6042 | OY/0034 | OY/0034/S/14 | Trinity Hospital (Nig) Ltd.       |                                                         | 84, Fajuyi Road Ekotedo Adamasingga, Ibadan, Oyo State      | Ibadan South West | Oyo |
| 6043 | OY/0039 | OY/0039/S/1  | Oke Ado Hospital                  | O&G, Paediatrics, Gen. Surgery                          | SW4/217, Ibukun Olu Street, Eko-Tedo, Ibadan                | Ibadan South West | Oyo |
| 6044 | OY/0039 | OY/0039/S/6  | Oke Ado Hospital                  | O&G, Paediatrics, Gen. Surgery                          | SW4/217, Ibukun Olu Street, Eko-Tedo, Ibadan                | Ibadan South West | Oyo |
| 6045 | OY/0039 | OY/0039/S/3  | Oke Ado Hospital                  | O&G, Paediatrics, Gen. Surgery                          | SW4/217, Ibukun Olu Street, Eko-Tedo, Ibadan                | Ibadan South West | Oyo |
| 6046 | OY/0042 | OY/0042/S/3  | Kejide Specialist Hospital        |                                                         | Sw 9/704a Elewure Str., Challenge, Ibadan                   | Ibadan North      | Oyo |
| 6047 | OY/0042 | OY/0042/S/8  | Kejide Specialist Hospital        |                                                         | Sw 9/704a Elewure Str., Challenge, Ibadan                   | Ibadan North      | Oyo |
| 6048 | OY/0042 | OY/0042/S/2  | Kejide Specialist Hospital        |                                                         | Sw 9/704a Elewure Str., Challenge, Ibadan                   | Ibadan North      | Oyo |
| 6049 | OY/0042 | OY/0042/S/6  | Kejide Specialist Hospital        |                                                         | Sw 9/704a Elewure Str., Challenge, Ibadan                   | Ibadan North      | Oyo |
| 6050 | OY/0042 | OY/0042/S/7  | Kejide Specialist Hospital        |                                                         | Sw 9/704a Elewure Str., Challenge, Ibadan                   | Ibadan North      | Oyo |
| 6051 | OY/0042 | OY/0042/S/1  | Kejide Specialist Hospital        |                                                         | Sw 9/704a Elewure Str., Challenge, Ibadan                   | Ibadan North      | Oyo |
| 6052 | OY/0042 | OY/0042/S/5  | Kejide Specialist Hospital        |                                                         | Sw 9/704a Elewure Str., Challenge, Ibadan                   | Ibadan North      | Oyo |
| 6053 | OY/0043 | OY/0043/S/2  | Mak Clinic                        |                                                         | By Alma Guest House Junction, Opp. Nitel New Bodija, Ibadan | Ibadan North      | Oyo |
| 6054 | OY/0043 | OY/0043/S/3  | Mak Clinic                        |                                                         | By Alma Guest House Junction, Opp. Nitel New Bodija, Ibadan | Ibadan North      | Oyo |
| 6055 | OY/0043 | OY/0043/S/1  | Mak Clinic                        |                                                         | By Alma Guest House Junction, Opp. Nitel New Bodija, Ibadan | Ibadan North      | Oyo |
| 6056 | OY/0043 | OY/0043/S/5  | Mak Clinic                        |                                                         | By Alma Guest House Junction, Opp. Nitel New Bodija, Ibadan | Ibadan North      | Oyo |
| 6057 | OY/0044 | OY/0044/S/4  | Alafia Hospital                   | -                                                       | Mokola, Ibadan                                              | Ibadan North      | Oyo |
| 6058 | OY/0044 | OY/0044/S/3  | Alafia Hospital                   | -                                                       | Mokola, Ibadan                                              | Ibadan North      | Oyo |
| 6059 | OY/0044 | OY/0044/S/1  | Alafia Hospital                   | -                                                       | Mokola, Ibadan                                              | Ibadan North      | Oyo |
| 6060 | OY/0044 | OY/0044/S/7  | Alafia Hospital                   | -                                                       | Mokola, Ibadan                                              | Ibadan North      | Oyo |
| 6061 | OY/0044 | OY/0044/S/5  | Alafia Hospital                   | -                                                       | Mokola, Ibadan                                              | Ibadan North      | Oyo |
| 6062 | OY/0050 | OY/0050/S/5  | State Hospital                    | Gen Surgery, O & G, Pharmacy, Physiotherapy, Laboratory | Ibadan                                                      | Ibadan North      | Oyo |
| 6063 | OY/0050 | OY/0050/S/1  | State Hospital                    | Gen Surgery, O & G, Pharmacy, Physiotherapy, Laboratory | Ibadan                                                      | Ibadan North      | Oyo |
| 6064 | OY/0050 | OY/0050/S/11 | State Hospital                    | Gen Surgery, O & G, Pharmacy, Physiotherapy, Laboratory | Ibadan                                                      | Ibadan North      | Oyo |
| 6065 | OY/0050 | OY/0050/S/4  | State Hospital                    | Gen Surgery, O & G, Pharmacy, Physiotherapy, Laboratory | Ibadan                                                      | Ibadan North      | Oyo |
| 6066 | OY/0050 | OY/0050/S/3  | State Hospital                    | Gen Surgery, O & G, Pharmacy, Physiotherapy, Laboratory | Ibadan                                                      | Ibadan North      | Oyo |
| 6067 | OY/0051 | OY/0051/S/1  | Teju Specialist Hospital          |                                                         | 6 Alh. Animasaun Street, Ring Road, Ibadan                  | Ibadan South-East | Oyo |
| 6068 | OY/0051 | OY/0051/S/3  | Teju Specialist Hospital          |                                                         | 6 Alh. Animasaun Street, Ring Road, Ibadan                  | Ibadan South-East | Oyo |
| 6069 | OY/0051 | OY/0051/S/6  | Teju Specialist Hospital          |                                                         | 6 Alh. Animasaun Street, Ring Road, Ibadan                  | Ibadan South-East | Oyo |
| 6070 | OY/0051 | OY/0051/S/2  | Teju Specialist Hospital          |                                                         | 6 Alh. Animasaun Street, Ring Road, Ibadan                  | Ibadan South-East | Oyo |
| 6071 | OY/0051 | OY/0051/S/4  | Teju Specialist Hospital          |                                                         | 6 Alh. Animasaun Street, Ring Road, Ibadan                  | Ibadan South-East | Oyo |
| 6072 | OY/0051 | OY/0051/S/5  | Teju Specialist Hospital          |                                                         | 6 Alh. Animasaun Street, Ring Road, Ibadan                  | Ibadan South-East | Oyo |
| 6073 | OY/0051 | OY/0051/S/7  | Teju Specialist Hospital          |                                                         | 6 Alh. Animasaun Street, Ring Road, Ibadan                  | Ibadan South-East | Oyo |
| 6074 | OY/0052 | OY/0052/S/1  | Toun Memorial Specialist Hospital |                                                         | Km 1/2 New Life Road, Ibadan                                | Ibadan South-East | Oyo |
| 6075 | OY/0052 | OY/0052/S/7  | Toun Memorial Specialist Hospital |                                                         | Km 1/2 New Life Road, Ibadan                                | Ibadan South-East | Oyo |
| 6076 | OY/0052 | OY/0052/S/5  | Toun Memorial Specialist Hospital |                                                         | Km 1/2 New Life Road, Ibadan                                | Ibadan South-East | Oyo |

|      |         |              |                                   |                                                                    |                                                                      |                   |     |
|------|---------|--------------|-----------------------------------|--------------------------------------------------------------------|----------------------------------------------------------------------|-------------------|-----|
| 6077 | OY/0052 | OY/0052/S/6  | Toun Memorial Specialist Hospital |                                                                    | Km 1/2 New Life Road, Ibadan                                         | Ibadan South-East | Oyo |
| 6078 | OY/0052 | OY/0052/S/3  | Toun Memorial Specialist Hospital |                                                                    | Km 1/2 New Life Road, Ibadan                                         | Ibadan South-East | Oyo |
| 6079 | OY/0063 | OY/0063/S/5  | Dorji Hospital                    |                                                                    | 14, Avenue New Bodija, Ibadan                                        | Ibadan North      | Oyo |
| 6080 | OY/0063 | OY/0063/S/7  | Dorji Hospital                    |                                                                    | 14, Avenue New Bodija, Ibadan                                        | Ibadan North      | Oyo |
| 6081 | OY/0065 | OY/0065/S/6  | Molly Specialist Hospital         |                                                                    | No.6, American Quarters Yidi, Ibadan                                 | Ibadan South West | Oyo |
| 6082 | OY/0065 | OY/0065/S/2  | Molly Specialist Hospital         |                                                                    | No.6, American Quarters Yidi, Ibadan                                 | Ibadan South West | Oyo |
| 6083 | OY/0065 | OY/0065/S/5  | Molly Specialist Hospital         |                                                                    | No.6, American Quarters Yidi, Ibadan                                 | Ibadan South West | Oyo |
| 6084 | OY/0065 | OY/0065/S/12 | Molly Specialist Hospital         |                                                                    | No.6, American Quarters Yidi, Ibadan                                 | Ibadan South West | Oyo |
| 6085 | OY/0065 | OY/0065/S/11 | Molly Specialist Hospital         |                                                                    | No.6, American Quarters Yidi, Ibadan                                 | Ibadan South West | Oyo |
| 6086 | OY/0065 | OY/0065/S/4  | Molly Specialist Hospital         |                                                                    | No.6, American Quarters Yidi, Ibadan                                 | Ibadan South West | Oyo |
| 6087 | OY/0065 | OY/0065/S/3  | Molly Specialist Hospital         |                                                                    | No.6, American Quarters Yidi, Ibadan                                 | Ibadan South West | Oyo |
| 6088 | OY/0065 | OY/0065/S/1  | Molly Specialist Hospital         |                                                                    | No.6, American Quarters Yidi, Ibadan                                 | Ibadan South West | Oyo |
| 6089 | OY/0065 | OY/0065/S/7  | Molly Specialist Hospital         |                                                                    | No.6, American Quarters Yidi, Ibadan                                 | Ibadan South West | Oyo |
| 6090 | OY/0065 | OY/0065/S/10 | Molly Specialist Hospital         |                                                                    | No.6, American Quarters Yidi, Ibadan                                 | Ibadan South West | Oyo |
| 6091 | OY/0067 | OY/0067/S/3  | Lad Medical Centre                |                                                                    | 1 Lad Hospital Road, Beside Police Barracks, Orita Challenge, Ibadan | Ibadan South West | Oyo |
| 6092 | OY/0067 | OY/0067/S/5  | Lad Medical Centre                |                                                                    | 1 Lad Hospital Road, Beside Police Barracks, Orita Challenge, Ibadan | Ibadan South West | Oyo |
| 6093 | OY/0067 | OY/0067/S/1  | Lad Medical Centre                |                                                                    | 1 Lad Hospital Road, Beside Police Barracks, Orita Challenge, Ibadan | Ibadan South West | Oyo |
| 6094 | OY/0068 | OY/0068/S/1  | Al-Hayyu Hospital                 | Primary, General Surgery, Laboratory, Internal Medicine, Radiology | Saw-Mill Ife Road, Ibadan                                            | Ibadan North East | Oyo |
| 6095 | OY/0068 | OY/0068/S/2  | Al-Hayyu Hospital                 | Primary, General Surgery, Laboratory, Internal Medicine, Radiology | Saw-Mill Ife Road, Ibadan                                            | Ibadan North East | Oyo |
| 6096 | OY/0068 | OY/0068/S/5  | Al-Hayyu Hospital                 | Primary, General Surgery, Laboratory, Internal Medicine, Radiology | Saw-Mill Ife Road, Ibadan                                            | Ibadan North East | Oyo |
| 6097 | OY/0068 | OY/0068/S/7  | Al-Hayyu Hospital                 | Primary, General Surgery, Laboratory, Internal Medicine, Radiology | Saw-Mill Ife Road, Ibadan                                            | Ibadan North East | Oyo |
| 6098 | OY/0068 | OY/0068/S/3  | Al-Hayyu Hospital                 | Primary, General Surgery, Laboratory, Internal Medicine, Radiology | Saw-Mill Ife Road, Ibadan                                            | Ibadan North East | Oyo |
| 6099 | OY/0070 | OY/0070/S/14 | Asvon Hospital                    |                                                                    | Km 11/4 Opp. New Gbagi Market, New Life Road, Ibadan                 | Ibadan North East | Oyo |
| 6100 | OY/0070 | OY/0070/S/5  | Asvon Hospital                    |                                                                    | Km 11/4 Opp. New Gbagi Market, New Life Road, Ibadan                 | Ibadan North East | Oyo |
| 6101 | OY/0070 | OY/0070/S/2  | Asvon Hospital                    |                                                                    | Km 11/4 Opp. New Gbagi Market, New Life Road, Ibadan                 | Ibadan North East | Oyo |
| 6102 | OY/0071 | OY/0071/S/3  | New Bodija Hospital Group         |                                                                    | 3, Ayoola Drive, New Bodija, Ibadan                                  | Ibadan North      | Oyo |
| 6103 | OY/0072 | OY/0072/S/5  | Lafia Hospital                    |                                                                    | Sw 9/960 Abeokuta Road, Apata, Ibadan                                | Ibadan South West | Oyo |
| 6104 | OY/0072 | OY/0072/S/7  | Lafia Hospital                    |                                                                    | Sw 9/960 Abeokuta Road, Apata, Ibadan                                | Ibadan South West | Oyo |
| 6105 | OY/0072 | OY/0072/S/3  | Lafia Hospital                    |                                                                    | Sw 9/960 Abeokuta Road, Apata, Ibadan                                | Ibadan South West | Oyo |

|      |         |              |                                                     |            |                                                                             |                   |     |
|------|---------|--------------|-----------------------------------------------------|------------|-----------------------------------------------------------------------------|-------------------|-----|
| 6106 | OY/0073 | OY/0073/S/1  | Fadebi Memorial Hospital                            |            | Km 7, Iwo Road (Oki), Ibadan                                                | Ibadan North East | Oyo |
| 6107 | OY/0073 | OY/0073/S/3  | Fadebi Memorial Hospital                            |            | Km 7, Iwo Road (Oki), Ibadan                                                | Ibadan North East | Oyo |
| 6108 | OY/0075 | OY/0075/S/5  | Medical Practitioners Services                      |            | Mokola Roundabout, Ibadan                                                   | Ibadan North      | Oyo |
| 6109 | OY/0075 | OY/0075/S/3  | Medical Practitioners Services                      |            | Mokola Roundabout, Ibadan                                                   | Ibadan North      | Oyo |
| 6110 | OY/0075 | OY/0075/S/1  | Medical Practitioners Services                      |            | Mokola Roundabout, Ibadan                                                   | Ibadan North      | Oyo |
| 6111 | OY/0076 | OY/0076/S/5  | Imperial Hospital                                   |            | Yemetu, Ibadan                                                              | Ibadan North      | Oyo |
| 6112 | OY/0077 | OY/0077/S/2  | Beta-Life Hospital                                  |            | 14, Popoola Yemoja Street, Off Awolowo Avenue, Oke Ado, Ibadan              | Ibadan South West | Oyo |
| 6113 | OY/0077 | OY/0077/S/3  | Beta-Life Hospital                                  |            | 14, Popoola Yemoja Street, Off Awolowo Avenue, Oke Ado, Ibadan              | Ibadan South West | Oyo |
| 6114 | OY/0077 | OY/0077/S/6  | Beta-Life Hospital                                  |            | 14, Popoola Yemoja Street, Off Awolowo Avenue, Oke Ado, Ibadan              | Ibadan South West | Oyo |
| 6115 | OY/0077 | OY/0077/S/1  | Beta-Life Hospital                                  |            | 14, Popoola Yemoja Street, Off Awolowo Avenue, Oke Ado, Ibadan              | Ibadan South West | Oyo |
| 6116 | OY/0078 | OY/0078/S/12 | Highland Specialist Hospital                        |            | The House Of Hearing, Adeoyo Hospital Road, Yemetu, Ibadan                  | Ibadan North      | Oyo |
| 6117 | OY/0079 | OY/0079/S/2  | St. Mary's Catholic General Hospital, Eleta, Ibadan |            | Eleta, Ibadan, Oyo State                                                    | Ibadan South West | Oyo |
| 6118 | OY/0079 | OY/0079/S/5  | St. Mary's Catholic General Hospital, Eleta, Ibadan |            | Eleta, Ibadan, Oyo State                                                    | Ibadan South West | Oyo |
| 6119 | OY/0079 | OY/0079/S/4  | St. Mary's Catholic General Hospital, Eleta, Ibadan |            | Eleta, Ibadan, Oyo State                                                    | Ibadan South West | Oyo |
| 6120 | OY/0079 | OY/0079/S/3  | St. Mary's Catholic General Hospital, Eleta, Ibadan |            | Eleta, Ibadan, Oyo State                                                    | Ibadan South West | Oyo |
| 6121 | OY/0079 | OY/0079/S/1  | St. Mary's Catholic General Hospital, Eleta, Ibadan |            | Eleta, Ibadan, Oyo State                                                    | Ibadan South West | Oyo |
| 6122 | OY/0079 | OY/0079/S/7  | St. Mary's Catholic General Hospital, Eleta, Ibadan |            | Eleta, Ibadan, Oyo State                                                    | Ibadan South West | Oyo |
| 6123 | OY/0079 | OY/0079/S/6  | St. Mary's Catholic General Hospital, Eleta, Ibadan |            | Eleta, Ibadan, Oyo State                                                    | Ibadan South West | Oyo |
| 6124 | OY/0081 | OY/0081/S/5  | Skyline Specialist Clinic                           |            | 14, Olalekan Alabi Close, Off Abayomi Bus Stop, Iwo Road, Ibadan, Oyo State | Ibadan North      | Oyo |
| 6125 | OY/0081 | OY/0081/S/3  | Skyline Specialist Clinic                           |            | 14, Olalekan Alabi Close, Off Abayomi Bus Stop, Iwo Road, Ibadan, Oyo State | Ibadan North      | Oyo |
| 6126 | OY/0083 | OY/0083/S/4  | Baptist Hospital                                    |            | Oyo, Ibadan                                                                 | Oyo West          | Oyo |
| 6127 | OY/0083 | OY/0083/S/1  | Baptist Hospital                                    |            | Oyo, Ibadan                                                                 | Oyo West          | Oyo |
| 6128 | OY/0083 | OY/0083/S/5  | Baptist Hospital                                    |            | Oyo, Ibadan                                                                 | Oyo West          | Oyo |
| 6129 | OY/0083 | OY/0083/S/7  | Baptist Hospital                                    |            | Oyo, Ibadan                                                                 | Oyo West          | Oyo |
| 6130 | OY/0083 | OY/0083/S/6  | Baptist Hospital                                    |            | Oyo, Ibadan                                                                 | Oyo West          | Oyo |
| 6131 | OY/0083 | OY/0083/S/2  | Baptist Hospital                                    |            | Oyo, Ibadan                                                                 | Oyo West          | Oyo |
| 6132 | OY/0083 | OY/0083/S/3  | Baptist Hospital                                    |            | Oyo, Ibadan                                                                 | Oyo West          | Oyo |
| 6133 | OY/0086 | OY/0086/S/3  | Oyin Specialist Hospital                            |            | Airport Road, Ibadan                                                        | Ibadan North      | Oyo |
| 6134 | OY/0088 | OY/0088/S/5  | Giftrolab                                           | Laboratory | Yemetu N/4263B, Adeoyo Road, beside Mobil Petrol Station                    | Ibadan North      | Oyo |
| 6135 | OY/0090 | OY/0090/S/5  | Emma Laboratory                                     | Laboratory | Lateef Afolabi House, Behind BZN Petrol Station, Oyo.                       | Ibadan North West | Oyo |
| 6136 | OY/0092 | OY/0092/S/4  | Kamy Pharmacy                                       | Pharmacy   | NW4/183, George street, Odi-Ora Eko Tedo                                    | Ibadan North      | Oyo |
| 6137 | OY/0093 | OY/0093/S/4  | Bimot Pharmacy (Nig)                                | Pharmacy   | No.4, Ojo Ikolaba Street, Ikolaba                                           | Ibadan North      | Oyo |
| 6138 | OY/0094 | OY/0094/S/4  | Shekinah Glory Pharmacy                             | Pharmacy   | Ibadan, Oyo State.                                                          | Ibadan North      | Oyo |
| 6139 | OY/0096 | OY/0096/S/4  | Layis Pharmacy                                      | Pharmacy   | Oke-Ado, Sabo, Ogbomoso, baptist Medical Centre, Ogbomoso                   | Ogbomoso South    | Oyo |
| 6140 | OY/0097 | OY/0097/S/4  | Kavillne Pharmacy                                   | Pharmacy   | Apake, Ilorin, Ogbomoso                                                     | Ogbomoso South    | Oyo |

|      |         |              |                                  |               |                                                                   |                   |     |
|------|---------|--------------|----------------------------------|---------------|-------------------------------------------------------------------|-------------------|-----|
| 6141 | OY/0101 | OY/0101/S/5  | Ultimate Medical Diagnostic Lab. | Laboratory    | Oare Ofe Commercial Complex, Opp. Jidex Industries, Apata Du      | Ibadan South West | Oyo |
| 6142 | OY/0102 | OY/0102/S/5  | Topmed laboratory Services       | Laboratory    | Plot 10, balogun Kobomoje Street, Near 'D' Ravans, Ring Road      | Ibadan South West | Oyo |
| 6143 | OY/0103 | OY/0103/S/5  | Confidence med. Diag. Centre     | Laboratory    | 13, Poly Road, Sango                                              | Ibadan North      | Oyo |
| 6144 | OY/0104 | OY/0104/S/5  | ACE Lab. Med. Diag. Centre       | Laboratory    | 114/742A Yemetu Market, Adeoye Street                             | Ibadan North      | Oyo |
| 6145 | OY/0105 | OY/0105/S/5  | Breeze Diag. Medical Lab. Centre | Laboratory    | 2, W.O. Lawal Str., Opp. NEPA Zonal Hqrs, Ring Road               | Ibadan South West | Oyo |
| 6146 | OY/0106 | OY/0106/S/5  | Search Med. Diag. Centre Ltd     | Laboratory    | 238, Obafemi Awolowo Way, Opp. UMC                                | Ibadan North      | Oyo |
| 6147 | OY/0122 | OY/0122/S/4  | Ireti Oluwa Hospital             |               | Apake Area Ogbomosho, Ibadan                                      | Ogbomosho South   | Oyo |
| 6148 | OY/0122 | OY/0122/S/5  | Ireti Oluwa Hospital             |               | Apake Area Ogbomosho, Ibadan                                      | Ogbomosho South   | Oyo |
| 6149 | OY/0130 | OY/0130/S/7  | Two Tees X-Ray Centre            | Radiology     | No. 4/460, Aladorin Street Yemetu, Ibadan                         | Ibadan North      | Oyo |
| 6150 | OY/0131 | OY/0131/S/11 | Oluwaseun Physiotherapy Clinic   | Physiotherapy | 9, Sanda Street Molete, Ibadan                                    | Ibadan North      | Oyo |
| 6151 | OY/0132 | OY/0132/S/8  | Modot Dental Clinic              | Dental        | Uncle Joe Building Oyo Road, Mokola, Ibadan                       | Ibadan North      | Oyo |
| 6152 | OY/0134 | OY/0134/S/8  | Tos Dental Clinic                | Dental        | 53, Oyo Road, Ibadan                                              | Ibadan South West | Oyo |
| 6153 | OY/0139 | OY/0139/S/4  | Oluyole Chemist                  | Pharmacy      | NW7/555, Eleyele, Ibadan                                          | Ibadan North      | Oyo |
| 6154 | OY/0140 | OY/0140/S/4  | Babmor Pharmacy                  | Pharmacy      | 30, Oyo Road, Agbowo-Ibadan                                       | Ibadan North      | Oyo |
| 6155 | OY/0142 | OY/0142/S/4  | Bamulot Pharmacy & Stores        | Pharmacy      | Opp. New Gbagi Market, Old Ife Road, Ibadan                       | Ibadan South West | Oyo |
| 6156 | OY/0143 | OY/0143/S/4  | Skybond Pharmacy Ltd.            | Pharmacy      | Liberty Junction, Oke-Ado, Ibadan                                 | Ibadan South West | Oyo |
| 6157 | OY/0144 | OY/0144/S/4  | Okay Pharmacy & Stores           | Pharmacy      | Agbowo Shopping Complex, Opp. U.I. Ibadan                         | Ibadan North      | Oyo |
| 6158 | OY/0145 | OY/0145/S/4  | Pharmalot Ltd.                   | Pharmacy      | Unit 3, Exescee Shopping Complex, Bode Wasinmi, Ibadan            | Ibadan North      | Oyo |
| 6159 | OY/0146 | OY/0146/S/4  | Doksy Pharmacy                   | Pharmacy      | Gbaremun Market Poly Road, Ibadan                                 | Ibadan North      | Oyo |
| 6160 | OY/0148 | OY/0148/S/4  | Glolade Pharmacy Ltd.            | Pharmacy      | Ojoo T. Junction, Ibadan                                          | Ibadan North      | Oyo |
| 6161 | OY/0149 | OY/0149/S/4  | Tanike Pharmacy Ltd.             | Pharmacy      | Opp. Texaco Petrol Station, Monatan, Ibadan                       | Ibadan North      | Oyo |
| 6162 | OY/0150 | OY/0150/S/4  | Funmac Pharmacy                  | Pharmacy      | Oluyole Estate Junction, Ring Road, Ibadan                        | Ibadan South West | Oyo |
| 6163 | OY/0151 | OY/0151/S/4  | Fadey Allamnda Pharmacy          | Pharmacy      | E9/912 Abayomi Iwo Road, Ibadan                                   | Ibadan North      | Oyo |
| 6164 | OY/0152 | OY/0152/S/4  | Nubifal Pharmacy & Stores Ltd    | Pharmacy      | 1, Bamigbola Avenue Ashi, Ibadan                                  | Ibadan North      | Oyo |
| 6165 | OY/0153 | OY/0153/S/4  | Trumed Ltd.                      | Pharmacy      | SW9/1427, New Adeoyo Rd., Ring Road, Ibadan                       | Ibadan South West | Oyo |
| 6166 | OY/0157 | OY/0157/S/4  | Boset (Nig) Ltd.                 | Pharmacy      | SW9/159B Abeokuta Road, Apata, Ibadan                             | Ibadan South West | Oyo |
| 6167 | OY/0159 | OY/0159/S/4  | Gaal Pharmaceutical Shop         | Pharmacy      | 3, Hamdu Ajibade Complex, Agodi Gate, Ibadan                      | Ibadan North      | Oyo |
| 6168 | OY/0160 | OY/0160/S/4  | Tellade Pharmacy & Stores        | Pharmacy      | Alhaji Alabi Shopping Complex, Molete-Junction, Ibadan, Oyo State | Ibadan North      | Oyo |
| 6169 | OY/0165 | OY/0165/S/3  | 2 Div Hospital                   |               | Adekunle Fajuyi Cantonment, Ibadan                                | Ibadan North      | Oyo |
| 6170 | OY/0165 | OY/0165/S/4  | 2 Div Hospital                   |               | Adekunle Fajuyi Cantonment, Ibadan                                | Ibadan North      | Oyo |
| 6171 | OY/0165 | OY/0165/S/8  | 2 Div Hospital                   |               | Adekunle Fajuyi Cantonment, Ibadan                                | Ibadan North      | Oyo |
| 6172 | OY/0165 | OY/0165/S/5  | 2 Div Hospital                   |               | Adekunle Fajuyi Cantonment, Ibadan                                | Ibadan North      | Oyo |
| 6173 | OY/0165 | OY/0165/S/1  | 2 Div Hospital                   |               | Adekunle Fajuyi Cantonment, Ibadan                                | Ibadan North      | Oyo |
| 6174 | OY/0165 | OY/0165/S/7  | 2 Div Hospital                   |               | Adekunle Fajuyi Cantonment, Ibadan                                | Ibadan North      | Oyo |
| 6175 | OY/0167 | OY/0167/S/3  | Muslim Hospital                  |               | Afote Road, Shaki                                                 | Saki West         | Oyo |
| 6176 | OY/0167 | OY/0167/S/5  | Muslim Hospital                  |               | Afote Road, Shaki                                                 | Saki West         | Oyo |
| 6177 | OY/0167 | OY/0167/S/7  | Muslim Hospital                  |               | Afote Road, Shaki                                                 | Saki West         | Oyo |
| 6178 | OY/0167 | OY/0167/S/1  | Muslim Hospital                  |               | Afote Road, Shaki                                                 | Saki West         | Oyo |
| 6179 | OY/0172 | OY/0172/S/3  | Ireti Oluwa Hospital             |               | Kajola Saw-Mill, Apake, Ogbomosho                                 | Ogbomosho North   | Oyo |
| 6180 | OY/0172 | OY/0172/S/5  | Ireti Oluwa Hospital             |               | Kajola Saw-Mill, Apake, Ogbomosho                                 | Ogbomosho North   | Oyo |
| 6181 | OY/0172 | OY/0172/S/4  | Ireti Oluwa Hospital             |               | Kajola Saw-Mill, Apake, Ogbomosho                                 | Ogbomosho North   | Oyo |
| 6182 | OY/0173 | OY/0173/S/7  | General Hospital, Iseyin         |               | Iseyin, Oyo State.                                                | Iseyin            | Oyo |



|      |         |              |                                |  |                                     |                   |     |
|------|---------|--------------|--------------------------------|--|-------------------------------------|-------------------|-----|
| 6183 | OY/0173 | OY/0173/S/3  | General Hospital, Iseyin       |  | Iseyin, Oyo State.                  | Iseyin            | Oyo |
| 6184 | OY/0173 | OY/0173/S/1  | General Hospital, Iseyin       |  | Iseyin, Oyo State.                  | Iseyin            | Oyo |
| 6185 | OY/0173 | OY/0173/S/4  | General Hospital, Iseyin       |  | Iseyin, Oyo State.                  | Iseyin            | Oyo |
| 6186 | OY/0173 | OY/0173/S/5  | General Hospital, Iseyin       |  | Iseyin, Oyo State.                  | Iseyin            | Oyo |
| 6187 | OY/0174 | OY/0174/S/1  | Our Lady Catholic Hospital     |  | Iseyin, Oyo State.                  | Iseyin            | Oyo |
| 6188 | OY/0174 | OY/0174/S/5  | Our Lady Catholic Hospital     |  | Iseyin, Oyo State.                  | Iseyin            | Oyo |
| 6189 | OY/0174 | OY/0174/S/3  | Our Lady Catholic Hospital     |  | Iseyin, Oyo State.                  | Iseyin            | Oyo |
| 6190 | OY/0174 | OY/0174/S/4  | Our Lady Catholic Hospital     |  | Iseyin, Oyo State.                  | Iseyin            | Oyo |
| 6191 | OY/0174 | OY/0174/S/15 | Our Lady Catholic Hospital     |  | Iseyin, Oyo State.                  | Iseyin            | Oyo |
| 6192 | OY/0174 | OY/0174/S/7  | Our Lady Catholic Hospital     |  | Iseyin, Oyo State.                  | Iseyin            | Oyo |
| 6193 | OY/0175 | OY/0175/S/11 | Adeoyo Maternity Hospital      |  | Yemetu Road, Ibadan.                | Ibadan North      | Oyo |
| 6194 | OY/0175 | OY/0175/S/5  | Adeoyo Maternity Hospital      |  | Yemetu Road, Ibadan.                | Ibadan North      | Oyo |
| 6195 | OY/0175 | OY/0175/S/3  | Adeoyo Maternity Hospital      |  | Yemetu Road, Ibadan.                | Ibadan North      | Oyo |
| 6196 | OY/0175 | OY/0175/S/6  | Adeoyo Maternity Hospital      |  | Yemetu Road, Ibadan.                | Ibadan North      | Oyo |
| 6197 | OY/0175 | OY/0175/S/4  | Adeoyo Maternity Hospital      |  | Yemetu Road, Ibadan.                | Ibadan North      | Oyo |
| 6198 | OY/0175 | OY/0175/S/15 | Adeoyo Maternity Hospital      |  | Yemetu Road, Ibadan.                | Ibadan North      | Oyo |
| 6199 | OY/0175 | OY/0175/S/7  | Adeoyo Maternity Hospital      |  | Yemetu Road, Ibadan.                | Ibadan North      | Oyo |
| 6200 | OY/0176 | OY/0176/S/4  | Ring Road Hospital             |  | Ring Road, Ibadan                   | Ibadan South West | Oyo |
| 6201 | OY/0176 | OY/0176/S/15 | Ring Road Hospital             |  | Ring Road, Ibadan                   | Ibadan South West | Oyo |
| 6202 | OY/0176 | OY/0176/S/11 | Ring Road Hospital             |  | Ring Road, Ibadan                   | Ibadan South West | Oyo |
| 6203 | OY/0176 | OY/0176/S/7  | Ring Road Hospital             |  | Ring Road, Ibadan                   | Ibadan South West | Oyo |
| 6204 | OY/0176 | OY/0176/S/5  | Ring Road Hospital             |  | Ring Road, Ibadan                   | Ibadan South West | Oyo |
| 6205 | OY/0176 | OY/0176/S/3  | Ring Road Hospital             |  | Ring Road, Ibadan                   | Ibadan South West | Oyo |
| 6206 | OY/0176 | OY/0176/S/10 | Ring Road Hospital             |  | Ring Road, Ibadan                   | Ibadan South West | Oyo |
| 6207 | OY/0177 | OY/0177/S/7  | Jerico General Hospital        |  | Magazine Road, Jerico, Ibadan.      | Ibadan North      | Oyo |
| 6208 | OY/0177 | OY/0177/S/4  | Jerico General Hospital        |  | Magazine Road, Jerico, Ibadan.      | Ibadan North      | Oyo |
| 6209 | OY/0177 | OY/0177/S/3  | Jerico General Hospital        |  | Magazine Road, Jerico, Ibadan.      | Ibadan North      | Oyo |
| 6210 | OY/0177 | OY/0177/S/1  | Jerico General Hospital        |  | Magazine Road, Jerico, Ibadan.      | Ibadan North      | Oyo |
| 6211 | OY/0177 | OY/0177/S/5  | Jerico General Hospital        |  | Magazine Road, Jerico, Ibadan.      | Ibadan North      | Oyo |
| 6212 | OY/0177 | OY/0177/S/11 | Jerico General Hospital        |  | Magazine Road, Jerico, Ibadan.      | Ibadan North      | Oyo |
| 6213 | OY/0178 | OY/0178/S/1  | State Hospital, Oyo            |  | Oyo, Oyo State                      | Oyo West          | Oyo |
| 6214 | OY/0178 | OY/0178/S/5  | State Hospital, Oyo            |  | Oyo, Oyo State                      | Oyo West          | Oyo |
| 6215 | OY/0178 | OY/0178/S/4  | State Hospital, Oyo            |  | Oyo, Oyo State                      | Oyo West          | Oyo |
| 6216 | OY/0178 | OY/0178/S/11 | State Hospital, Oyo            |  | Oyo, Oyo State                      | Oyo West          | Oyo |
| 6217 | OY/0178 | OY/0178/S/7  | State Hospital, Oyo            |  | Oyo, Oyo State                      | Oyo West          | Oyo |
| 6218 | OY/0178 | OY/0178/S/3  | State Hospital, Oyo            |  | Oyo, Oyo State                      | Oyo West          | Oyo |
| 6219 | OY/0179 | OY/0179/S/5  | State Hospital, Ogbomosho      |  | Ogbomosho, Oyo State.               | Ogbomosho South   | Oyo |
| 6220 | OY/0179 | OY/0179/S/4  | State Hospital, Ogbomosho      |  | Ogbomosho, Oyo State.               | Ogbomosho South   | Oyo |
| 6221 | OY/0179 | OY/0179/S/7  | State Hospital, Ogbomosho      |  | Ogbomosho, Oyo State.               | Ogbomosho South   | Oyo |
| 6222 | OY/0179 | OY/0179/S/1  | State Hospital, Ogbomosho      |  | Ogbomosho, Oyo State.               | Ogbomosho South   | Oyo |
| 6223 | OY/0179 | OY/0179/S/3  | State Hospital, Ogbomosho      |  | Ogbomosho, Oyo State.               | Ogbomosho South   | Oyo |
| 6224 | OY/0180 | OY/0180/S/4  | Oni Memorial Children Hospital |  | Ring Road, Ibadan                   | Ibadan South West | Oyo |
| 6225 | OY/0180 | OY/0180/S/6  | Oni Memorial Children Hospital |  | Ring Road, Ibadan                   | Ibadan South West | Oyo |
| 6226 | OY/0180 | OY/0180/S/5  | Oni Memorial Children Hospital |  | Ring Road, Ibadan                   | Ibadan South West | Oyo |
| 6227 | OY/0180 | OY/0180/S/7  | Oni Memorial Children Hospital |  | Ring Road, Ibadan                   | Ibadan South West | Oyo |
| 6228 | OY/0182 | OY/0182/S/8  | State Hospital, Saki           |  | Saki, Sango Road, Ibadan, Oyo State | Saki West         | Oyo |
| 6229 | OY/0182 | OY/0182/S/7  | State Hospital, Saki           |  | Saki, Sango Road, Ibadan, Oyo State | Saki West         | Oyo |
| 6230 | OY/0182 | OY/0182/S/5  | State Hospital, Saki           |  | Saki, Sango Road, Ibadan, Oyo State | Saki West         | Oyo |

|      |         |              |                                              |                      |                                                      |                   |     |
|------|---------|--------------|----------------------------------------------|----------------------|------------------------------------------------------|-------------------|-----|
| 6231 | OY/0182 | OY/0182/S/3  | State Hospital, Saki                         |                      | Saki, Sango Road, Ibadan, Oyo State                  | Saki West         | Oyo |
| 6232 | OY/0182 | OY/0182/S/1  | State Hospital, Saki                         |                      | Saki, Sango Road, Ibadan, Oyo State                  | Saki West         | Oyo |
| 6233 | OY/0182 | OY/0182/S/4  | State Hospital, Saki                         |                      | Saki, Sango Road, Ibadan, Oyo State                  | Saki West         | Oyo |
| 6234 | OY/0183 | OY/0183/S/1  | Baptist Medical Centre, Saki                 |                      | Ajgunle Area, Saki, Oyo State                        | Saki East         | Oyo |
| 6235 | OY/0183 | OY/0183/S/3  | Baptist Medical Centre, Saki                 |                      | Ajgunle Area, Saki, Oyo State                        | Saki East         | Oyo |
| 6236 | OY/0183 | OY/0183/S/6  | Baptist Medical Centre, Saki                 |                      | Ajgunle Area, Saki, Oyo State                        | Saki East         | Oyo |
| 6237 | OY/0183 | OY/0183/S/4  | Baptist Medical Centre, Saki                 |                      | Ajgunle Area, Saki, Oyo State                        | Saki East         | Oyo |
| 6238 | OY/0183 | OY/0183/S/5  | Baptist Medical Centre, Saki                 |                      | Ajgunle Area, Saki, Oyo State                        | Saki East         | Oyo |
| 6239 | OY/0183 | OY/0183/S/7  | Baptist Medical Centre, Saki                 |                      | Ajgunle Area, Saki, Oyo State                        | Saki East         | Oyo |
| 6240 | OY/0183 | OY/0183/S/15 | Baptist Medical Centre, Saki                 |                      | Ajgunle Area, Saki, Oyo State                        | Saki East         | Oyo |
| 6241 | OY/0184 | OY/0184/S/7  | Jerico Nursing Home                          |                      | Magazine Road, Ibadan.                               | Ibadan South-East | Oyo |
| 6242 | OY/0184 | OY/0184/S/11 | Jerico Nursing Home                          |                      | Magazine Road, Ibadan.                               | Ibadan South-East | Oyo |
| 6243 | OY/0184 | OY/0184/S/1  | Jerico Nursing Home                          |                      | Magazine Road, Ibadan.                               | Ibadan South-East | Oyo |
| 6244 | OY/0184 | OY/0184/S/4  | Jerico Nursing Home                          |                      | Magazine Road, Ibadan.                               | Ibadan South-East | Oyo |
| 6245 | OY/0184 | OY/0184/S/3  | Jerico Nursing Home                          |                      | Magazine Road, Ibadan.                               | Ibadan South-East | Oyo |
| 6246 | OY/0184 | OY/0184/S/5  | Jerico Nursing Home                          |                      | Magazine Road, Ibadan.                               | Ibadan South-East | Oyo |
| 6247 | OY/0188 | OY/0188/S/5  | Cottage Hospital/Comprehensive Health Centre |                      | Oyo Police Command, Ibadan, Oyo State                | Ibadan North      | Oyo |
| 6248 | OY/0188 | OY/0188/S/3  | Cottage Hospital/Comprehensive Health Centre |                      | Oyo Police Command, Ibadan, Oyo State                | Ibadan North      | Oyo |
| 6249 | OY/0188 | OY/0188/S/1  | Cottage Hospital/Comprehensive Health Centre |                      | Oyo Police Command, Ibadan, Oyo State                | Ibadan North      | Oyo |
| 6250 | OY/0188 | OY/0188/S/8  | Cottage Hospital/Comprehensive Health Centre |                      | Oyo Police Command, Ibadan, Oyo State                | Ibadan North      | Oyo |
| 6251 | OY/0188 | OY/0188/S/6  | Cottage Hospital/Comprehensive Health Centre |                      | Oyo Police Command, Ibadan, Oyo State                | Ibadan North      | Oyo |
| 6252 | OY/0188 | OY/0188/S/15 | Cottage Hospital/Comprehensive Health Centre |                      | Oyo Police Command, Ibadan, Oyo State                | Ibadan North      | Oyo |
| 6253 | OY/0188 | OY/0188/S/2  | Cottage Hospital/Comprehensive Health Centre |                      | Oyo Police Command, Ibadan, Oyo State                | Ibadan North      | Oyo |
| 6254 | OY/0188 | OY/0188/S/7  | Cottage Hospital/Comprehensive Health Centre |                      | Oyo Police Command, Ibadan, Oyo State                | Ibadan North      | Oyo |
| 6255 | OY/0188 | OY/0188/S/4  | Cottage Hospital/Comprehensive Health Centre |                      | Oyo Police Command, Ibadan, Oyo State                | Ibadan North      | Oyo |
| 6256 | OY/0189 | OY/0189/S/14 | Queen's Hospital                             | Primary              | 38, Iya Olobe St. Dugbe Eketedo Ibadan               | Ibadan North West | Oyo |
| 6257 | OY/0189 | OY/0189/S/2  | Queen's Hospital                             | Primary              | 38, Iya Olobe St. Dugbe Eketedo Ibadan               | Ibadan North West | Oyo |
| 6258 | OY/0191 | OY/0191/S/5  | Unity Medical Centre                         | Primary              | 31 Eleyele Rd Ibadan                                 | Ibadan North      | Oyo |
| 6259 | OY/0191 | OY/0191/S/1  | Unity Medical Centre                         | Primary              | 31 Eleyele Rd Ibadan                                 | Ibadan North      | Oyo |
| 6260 | OY/0192 | OY/0192/S/1  | St. Joseph Medical Centre                    | Primary              | No 27 Akintola Rd Ekotedo Ibadan                     | Ibadan North East | Oyo |
| 6261 | OY/0193 | OY/0193/S/2  | Full House Spec. Dermatological Hospital     | Primary, Dermatology | 37, Adeniran Onyulola Ave, Ring Rd Ibadan            | Ibadan South West | Oyo |
| 6262 | OY/0195 | OY/0195/S/1  | Anu Oluwa Specialist Hospital                | Primary              | 19 Bluegate Avenue, Oluyole Estate Extension, Ibadan | Ibadan South West | Oyo |
| 6263 | OY/0195 | OY/0195/S/3  | Anu Oluwa Specialist Hospital                | Primary              | 19 Bluegate Avenue, Oluyole Estate Extension, Ibadan | Ibadan South West | Oyo |
| 6264 | OY/0196 | OY/0196/S/3  | Joy Hospital & Maternity Centre              |                      | 32 Morgan St. Oke-Ado Ibadan                         | Ibadan South West | Oyo |
| 6265 | OY/0198 | OY/0198/S/5  | Mommoh Memorial Hospital                     |                      | Idi-Ope Oyo                                          | Oyo West          | Oyo |
| 6266 | OY/0206 | OY/0206/S/7  | Shalom Medical Centre                        | Primary              | Sabo Area Ogbomosho                                  | Ogbomosho North   | Oyo |
| 6267 | OY/0206 | OY/0206/S/1  | Shalom Medical Centre                        | Primary              | Sabo Area Ogbomosho                                  | Ogbomosho North   | Oyo |
| 6268 | OY/0206 | OY/0206/S/5  | Shalom Medical Centre                        | Primary              | Sabo Area Ogbomosho                                  | Ogbomosho North   | Oyo |
| 6269 | OY/0211 | OY/0211/S/3  | Zoe Specialist Mission Hospital              |                      | No.4 Adeogun Str., Oluyele Estate, Ibadan            | Ibadan North West | Oyo |

|      |         |              |                                               |                                                            |                                                                                        |                   |     |
|------|---------|--------------|-----------------------------------------------|------------------------------------------------------------|----------------------------------------------------------------------------------------|-------------------|-----|
| 6270 | OY/0211 | OY/0211/S/1  | Zoe Specialist Mission Hospital               |                                                            | No.4 Adeogun Str., Oluyele Estate, Ibadan                                              | Ibadan North West | Oyo |
| 6271 | OY/0216 | OY/0216/S/8  | Alfa Dental Clinic                            | Dental                                                     | Shop No 4 Cocco House Anex, Dugbe, Ibadan                                              | Ibadan North West | Oyo |
| 6272 | OY/0218 | OY/0218/S/13 | Wesco Clinic                                  | Optometry                                                  | 55 Oyo Road, Opp AG Leventis Sango, Ibadan                                             | Ibadan North      | Oyo |
| 6273 | OY/0219 | OY/0219/S/13 | Canan Optical Services                        | Optometry                                                  | 82 Fajuyi Road Adamasingba Opp gate 3, Ibadan                                          | Ibadan North West | Oyo |
| 6274 | OY/0221 | OY/0221/S/5  | Narkod Biomedical Lab.                        | Laboratory                                                 | 19 Lagos Bypass, Idioto Challenge                                                      | Ibadan South West | Oyo |
| 6275 | OY/0225 | OY/0225/S/13 | Sharp View Ophthalmic Clinic                  | Ophthalmology                                              | 64 Lagos Road Challenge, Ibadan                                                        | Ibadan South West | Oyo |
| 6276 | OY/0226 | OY/0226/S/11 | Jay-Kay Physiotherapy Clinic                  | Physiotherapy                                              | 8 Road Mokola Roundabout, Ibadan                                                       | Ibadan North      | Oyo |
| 6277 | OY/0227 | OY/0227/S/5  | Amedic Medical Laboratory                     | Laboratory                                                 | 96 Ile-Ekp Bus Stop, Iwo Road                                                          | Ibadan North East | Oyo |
| 6278 | OY/0228 | OY/0228/S/4  | St Mary's General Hospital                    | O&G,Surgery,Medicine,Paediatrics,Laboratory,X-ray,Pharmacy | Eleta, Near Academy                                                                    | Ibadan South-East | Oyo |
| 6279 | OY/0228 | OY/0228/S/5  | St Mary's General Hospital                    | O&G,Surgery,Medicine,Paediatrics,Laboratory,X-ray,Pharmacy | Eleta, Near Academy                                                                    | Ibadan South-East | Oyo |
| 6280 | OY/0228 | OY/0228/S/7  | St Mary's General Hospital                    | O&G,Surgery,Medicine,Paediatrics,Laboratory,X-ray,Pharmacy | Eleta, Near Academy                                                                    | Ibadan South-East | Oyo |
| 6281 | OY/0228 | OY/0228/S/3  | St Mary's General Hospital                    | O&G,Surgery,Medicine,Paediatrics,Laboratory,X-ray,Pharmacy | Eleta, Near Academy                                                                    | Ibadan South-East | Oyo |
| 6282 | OY/0228 | OY/0228/S/1  | St Mary's General Hospital                    | O&G,Surgery,Medicine,Paediatrics,Laboratory,X-ray,Pharmacy | Eleta, Near Academy                                                                    | Ibadan South-East | Oyo |
| 6283 | OY/0228 | OY/0228/S/2  | St Mary's General Hospital                    | O&G,Surgery,Medicine,Paediatrics,Laboratory,X-ray,Pharmacy | Eleta, Near Academy                                                                    | Ibadan South-East | Oyo |
| 6284 | OY/0228 | OY/0228/S/6  | St Mary's General Hospital                    | O&G,Surgery,Medicine,Paediatrics,Laboratory,X-ray,Pharmacy | Eleta, Near Academy                                                                    | Ibadan South-East | Oyo |
| 6285 | OY/0229 | OY/0229/S/13 | Joanness Ophthalmic Centre                    | Ophthalmology                                              | 2nd Floor, Oyeks Plaza, Beside Mobil Filling Station, Awolowo Junction, Bodija, Ibadan | Ibadan South West | Oyo |
| 6286 | OY/0230 | OY/0230/S/4  | Maranatha Pharmacy                            | Pharmacy                                                   | Shop 8, Students' Hostel I. A. R & T, Apata, Ibadan                                    | Ido               | Oyo |
| 6287 | OY/0231 | OY/0231/S/4  | Maranatha Pharmacy                            | Pharmacy                                                   | NCRI Quarters, Moore Plantation, Ibadan                                                | Ido               | Oyo |
| 6288 | OY/0232 | OY/0232/S/5  | Divine Diagnostic Centre                      | Laboratory                                                 | 12 Akintola Street, Behind Agboro Shopping Complex, UI, Ibadan                         | Ibadan South West | Oyo |
| 6289 | OY/0237 | OY/0237/S/4  | Living Faith Pharmacy Ltd                     | Pharmacy                                                   | 35A Ilaka Street, Near Akesan Market, Oyo                                              | Oyo West          | Oyo |
| 6290 | OY/0238 | OY/0238/S/4  | Omodunbi Pharmacy                             | Pharmacy                                                   | 1 Abiodun Atiba Road, Behind Akesan garage, Oyo                                        | Oyo East          | Oyo |
| 6291 | OY/0239 | OY/0239/S/4  | Damorex Pharmacy                              | Pharmacy                                                   | Sw9/958 Abeokuta Road, Apata, Ibadan                                                   | Ido               | Oyo |
| 6292 | OY/0240 | OY/0240/S/14 | Debo Ultra Sound Centre X-ray                 | USS,X-ray                                                  | Oke Balogun Road, Oyo                                                                  | Oyo East          | Oyo |
| 6293 | OY/0240 | OY/0240/S/7  | Debo Ultra Sound Centre X-ray                 | USS,X-ray                                                  | Oke Balogun Road, Oyo                                                                  | Oyo East          | Oyo |
| 6294 | OY/0241 | OY/0241/S/4  | Pharmaklinic Health & Pharmacy Shop           | Pharmacy                                                   | 11 Aare Avenue, Bodija                                                                 | Ibadan North      | Oyo |
| 6295 | OY/0242 | OY/0242/S/3  | Bowen University Teaching Hospital, Ogbomosho |                                                            | Ogbomosho, Oyo State                                                                   | Ogbomosho North   | Oyo |
| 6296 | OY/0242 | OY/0242/S/5  | Bowen University Teaching Hospital, Ogbomosho |                                                            | Ogbomosho, Oyo State                                                                   | Ogbomosho North   | Oyo |
| 6297 | OY/0242 | OY/0242/S/4  | Bowen University Teaching Hospital, Ogbomosho |                                                            | Ogbomosho, Oyo State                                                                   | Ogbomosho North   | Oyo |
| 6298 | OY/0242 | OY/0242/S/7  | Bowen University Teaching Hospital, Ogbomosho |                                                            | Ogbomosho, Oyo State                                                                   | Ogbomosho North   | Oyo |
| 6299 | OY/0242 | OY/0242/S/8  | Bowen University Teaching Hospital, Ogbomosho |                                                            | Ogbomosho, Oyo State                                                                   | Ogbomosho North   | Oyo |
| 6300 | OY/0242 | OY/0242/S/1  | Bowen University Teaching Hospital, Ogbomosho |                                                            | Ogbomosho, Oyo State                                                                   | Ogbomosho North   | Oyo |
| 6301 | OY/0242 | OY/0242/S/2  | Bowen University Teaching Hospital, Ogbomosho |                                                            | Ogbomosho, Oyo State                                                                   | Ogbomosho North   | Oyo |

|      |         |              |                                                           |                                                                                    |                                                                                        |                   |     |
|------|---------|--------------|-----------------------------------------------------------|------------------------------------------------------------------------------------|----------------------------------------------------------------------------------------|-------------------|-----|
| 6302 | OY/0242 | OY/0242/S/6  | Bowen University Teaching Hospital, Ogbomosho             |                                                                                    | Ogbomosho, Oyo State                                                                   | Ogbomosho North   | Oyo |
| 6303 | OY/0243 | OY/0243/S/9  | New World Specialist Hospital                             |                                                                                    | No. 7, Omona Yajo Close, Behind Children Home Sch. College Cresc., Molete Area, Ibadan | Ibadan South West | Oyo |
| 6304 | OY/0243 | OY/0243/S/1  | New World Specialist Hospital                             |                                                                                    | No. 7, Omona Yajo Close, Behind Children Home Sch. College Cresc., Molete Area, Ibadan | Ibadan South West | Oyo |
| 6305 | OY/0243 | OY/0243/S/5  | New World Specialist Hospital                             |                                                                                    | No. 7, Omona Yajo Close, Behind Children Home Sch. College Cresc., Molete Area, Ibadan | Ibadan South West | Oyo |
| 6306 | OY/0243 | OY/0243/S/4  | New World Specialist Hospital                             |                                                                                    | No. 7, Omona Yajo Close, Behind Children Home Sch. College Cresc., Molete Area, Ibadan | Ibadan South West | Oyo |
| 6307 | OY/0245 | OY/0245/S/14 | Bisol Medical Centre                                      | Primary                                                                            | Ilorra, Beside Immanuel Baptist Church Mafojubaye Street, Ilora                        | Afijio            | Oyo |
| 6308 | OY/0250 | OY/0250/S/7  | Catholic Hospital, Oluyoro                                | General Surgery, Laboratory, O & G, Radiology, Paediatrics, Pharmacy, Orthopaedics | Oluyoro, Ibadan, Oyo State                                                             | Ibadan North East | Oyo |
| 6309 | OY/0250 | OY/0250/S/5  | Catholic Hospital, Oluyoro                                | General Surgery, Laboratory, O & G, Radiology, Paediatrics, Pharmacy, Orthopaedics | Oluyoro, Ibadan, Oyo State                                                             | Ibadan North East | Oyo |
| 6310 | OY/0250 | OY/0250/S/1  | Catholic Hospital, Oluyoro                                | General Surgery, Laboratory, O & G, Radiology, Paediatrics, Pharmacy, Orthopaedics | Oluyoro, Ibadan, Oyo State                                                             | Ibadan North East | Oyo |
| 6311 | OY/0250 | OY/0250/S/10 | Catholic Hospital, Oluyoro                                | General Surgery, Laboratory, O & G, Radiology, Paediatrics, Pharmacy, Orthopaedics | Oluyoro, Ibadan, Oyo State                                                             | Ibadan North East | Oyo |
| 6312 | OY/0250 | OY/0250/S/6  | Catholic Hospital, Oluyoro                                | General Surgery, Laboratory, O & G, Radiology, Paediatrics, Pharmacy, Orthopaedics | Oluyoro, Ibadan, Oyo State                                                             | Ibadan North East | Oyo |
| 6313 | OY/0250 | OY/0250/S/4  | Catholic Hospital, Oluyoro                                | General Surgery, Laboratory, O & G, Radiology, Paediatrics, Pharmacy, Orthopaedics | Oluyoro, Ibadan, Oyo State                                                             | Ibadan North East | Oyo |
| 6314 | OY/0250 | OY/0250/S/3  | Catholic Hospital, Oluyoro                                | General Surgery, Laboratory, O & G, Radiology, Paediatrics, Pharmacy, Orthopaedics | Oluyoro, Ibadan, Oyo State                                                             | Ibadan North East | Oyo |
| 6315 | OY/0251 | OY/0251/S/2  | Bethel Specialist Hospital                                |                                                                                    | 30, Oyo Road, Coca/Oremeji Area Ajibade Bus Stop, Ibadan                               | Ibadan North      | Oyo |
| 6316 | OY/0251 | OY/0251/S/3  | Bethel Specialist Hospital                                |                                                                                    | 30, Oyo Road, Coca/Oremeji Area Ajibade Bus Stop, Ibadan                               | Ibadan North      | Oyo |
| 6317 | OY/0251 | OY/0251/S/1  | Bethel Specialist Hospital                                |                                                                                    | 30, Oyo Road, Coca/Oremeji Area Ajibade Bus Stop, Ibadan                               | Ibadan North      | Oyo |
| 6318 | OY/0252 | OY/0252/S/3  | University of Ibadan Health Services (Jaja Health Clinic) |                                                                                    | Ibadan, Oyo State                                                                      | Ibadan North      | Oyo |
| 6319 | OY/0252 | OY/0252/S/1  | University of Ibadan Health Services (Jaja Health Clinic) |                                                                                    | Ibadan, Oyo State                                                                      | Ibadan North      | Oyo |
| 6320 | OY/0252 | OY/0252/S/9  | University of Ibadan Health Services (Jaja Health Clinic) |                                                                                    | Ibadan, Oyo State                                                                      | Ibadan North      | Oyo |

|      |         |              |                                                           |          |                                                                                             |                   |     |
|------|---------|--------------|-----------------------------------------------------------|----------|---------------------------------------------------------------------------------------------|-------------------|-----|
| 6321 | OY/0252 | OY/0252/S/5  | University of Ibadan Health Services (Jaja Health Clinic) |          | Ibadan, Oyo State                                                                           | Ibadan North      | Oyo |
| 6322 | OY/0252 | OY/0252/S/2  | University of Ibadan Health Services (Jaja Health Clinic) |          | Ibadan, Oyo State                                                                           | Ibadan North      | Oyo |
| 6323 | OY/0252 | OY/0252/S/11 | University of Ibadan Health Services (Jaja Health Clinic) |          | Ibadan, Oyo State                                                                           | Ibadan North      | Oyo |
| 6324 | OY/0252 | OY/0252/S/4  | University of Ibadan Health Services (Jaja Health Clinic) |          | Ibadan, Oyo State                                                                           | Ibadan North      | Oyo |
| 6325 | OY/0256 | OY/0256/S/3  | Abiola Memorial Hospital                                  |          | N4/790 Yemetu, Ibadan                                                                       | Ibadan North      | Oyo |
| 6326 | OY/0258 | OY/0258/S/1  | Alawaye Hospital & Nursing Home Ltd                       |          | 7, Alawaye Hospital Road, Iwo Road, Ibadan                                                  | Ibadan North West | Oyo |
| 6327 | OY/0258 | OY/0258/S/3  | Alawaye Hospital & Nursing Home Ltd                       |          | 7, Alawaye Hospital Road, Iwo Road, Ibadan                                                  | Ibadan North West | Oyo |
| 6328 | OY/0263 | OY/0263/S/1  | Banby Specialist Hospital                                 |          | Plot 11, Blk XLII, Akobo Estate, Olorunda-Abaa Rd, Ibadan                                   | Lagelu            | Oyo |
| 6329 | OY/0263 | OY/0263/S/3  | Banby Specialist Hospital                                 |          | Plot 11, Blk XLII, Akobo Estate, Olorunda-Abaa Rd, Ibadan                                   | Lagelu            | Oyo |
| 6330 | OY/0263 | OY/0263/S/6  | Banby Specialist Hospital                                 |          | Plot 11, Blk XLII, Akobo Estate, Olorunda-Abaa Rd, Ibadan                                   | Lagelu            | Oyo |
| 6331 | OY/0263 | OY/0263/S/4  | Banby Specialist Hospital                                 |          | Plot 11, Blk XLII, Akobo Estate, Olorunda-Abaa Rd, Ibadan                                   | Lagelu            | Oyo |
| 6332 | OY/0263 | OY/0263/S/5  | Banby Specialist Hospital                                 |          | Plot 11, Blk XLII, Akobo Estate, Olorunda-Abaa Rd, Ibadan                                   | Lagelu            | Oyo |
| 6333 | OY/0263 | OY/0263/S/11 | Banby Specialist Hospital                                 |          | Plot 11, Blk XLII, Akobo Estate, Olorunda-Abaa Rd, Ibadan                                   | Lagelu            | Oyo |
| 6334 | OY/0263 | OY/0263/S/7  | Banby Specialist Hospital                                 |          | Plot 11, Blk XLII, Akobo Estate, Olorunda-Abaa Rd, Ibadan                                   | Lagelu            | Oyo |
| 6335 | OY/0270 | OY/0270/S/14 | IBADAN CENTRAL HOSPITAL                                   |          | OSOSAMI RD, OFF RING RD,IBADAN                                                              | Ibadan South West | Oyo |
| 6336 | OY/0271 | OY/0271/S/8  | FORTUNE HOSPITAL & DENTAL CENTRE                          |          | 32 MKO ABIOLA WAY , RING RD, IBADAN, ANFANI ROUNDABOUT                                      | Ibadan South West | Oyo |
| 6337 | OY/0271 | OY/0271/S/6  | FORTUNE HOSPITAL & DENTAL CENTRE                          |          | 32 MKO ABIOLA WAY , RING RD, IBADAN, ANFANI ROUNDABOUT                                      | Ibadan South West | Oyo |
| 6338 | OY/0271 | OY/0271/S/2  | FORTUNE HOSPITAL & DENTAL CENTRE                          |          | 32 MKO ABIOLA WAY , RING RD, IBADAN, ANFANI ROUNDABOUT                                      | Ibadan South West | Oyo |
| 6339 | OY/0272 | OY/0272/S/3  | HERITAGE COMPREHENSIVE HOSPITAL                           |          | 57 ANFANI RD, RING RD, IBADAN                                                               | Ibadan South West | Oyo |
| 6340 | OY/0272 | OY/0272/S/1  | HERITAGE COMPREHENSIVE HOSPITAL                           |          | 57 ANFANI RD, RING RD, IBADAN                                                               | Ibadan South West | Oyo |
| 6341 | OY/0275 | OY/0275/S/5  | MERCYLAND HOSPITAL & DENTAL                               |          | OPP. NEW GBAGI MARKET NEW IFE RD,IBADAN                                                     | Egbeda            | Oyo |
| 6342 | OY/0275 | OY/0275/S/8  | MERCYLAND HOSPITAL & DENTAL                               |          | OPP. NEW GBAGI MARKET NEW IFE RD,IBADAN                                                     | Egbeda            | Oyo |
| 6343 | OY/0276 | OY/0276/S/3  | EBENEZER CLINIC ( HOSP. & MAT. HOME)                      |          | 3/5 ONI LANE, OFF YEMETU ADEOYO RD,IBADAN                                                   | Ibadan North      | Oyo |
| 6344 | OY/0276 | OY/0276/S/1  | EBENEZER CLINIC ( HOSP. & MAT. HOME)                      |          | 3/5 ONI LANE, OFF YEMETU ADEOYO RD,IBADAN                                                   | Ibadan North      | Oyo |
| 6345 | OY/0278 | OY/0278/S/3  | Shalom Group Medical Centre                               |          | Aboderin Close, Agbaje Orita Challenge, Ibadan                                              | Oluyole           | Oyo |
| 6346 | OY/0285 | OY/0285/S/14 | Peamak Hospital & Maternity Centre                        |          | Alalubosa Road Oyo                                                                          | Oyo West          | Oyo |
| 6347 | OY/0285 | OY/0285/S/4  | Peamak Hospital & Maternity Centre                        |          | Alalubosa Road Oyo                                                                          | Oyo West          | Oyo |
| 6348 | OY/0285 | OY/0285/S/7  | Peamak Hospital & Maternity Centre                        |          | Alalubosa Road Oyo                                                                          | Oyo West          | Oyo |
| 6349 | OY/0290 | OY/0290/S/5  | ST.Jacob's Mssion Hospital                                |          | Road 26, Owode Housing Estate, Beside Tafo Event Center, Along Abeokuta Road, Apata, Ibadan | Ido               | Oyo |
| 6350 | OY/0290 | OY/0290/S/1  | ST.Jacob's Mssion Hospital                                |          | Road 26, Owode Housing Estate, Beside Tafo Event Center, Along Abeokuta Road, Apata, Ibadan | Ido               | Oyo |
| 6351 | OY/0291 | OY/0291/S/3  | ST.VINCENT MEDICAL CENTRE                                 |          | 34 AARE AVENUE , NEW BODIJA ESTATE,IBADAN                                                   | Ibadan North      | Oyo |
| 6352 | OY/0297 | OY/0297/S/4  | AREYETALE PHARMACY                                        | Pharmacy | 107 ASHI RD, IBADAN                                                                         | Ibadan North      | Oyo |
| 6353 | OY/0303 | OY/0303/S/4  | BOSTAY NIG LTD                                            | Pharmacy | IYANA CELE B/STOP OPP NNPC DEPOT, APATA                                                     | Ido               | Oyo |

|      |         |              |                                   |            |                                                                 |                   |     |
|------|---------|--------------|-----------------------------------|------------|-----------------------------------------------------------------|-------------------|-----|
| 6354 | OY/0308 | OY/0308/S/4  | GILEAD PHARMACEUTICALS            | Pharmacy   | 91-93 LAGOS RD, CHALLENGE (BESIDE TEXACO), IBADAN               | Ibadan South West | Oyo |
| 6355 | OY/0326 | OY/0326/S/4  | NINIOLA PHARMACY                  | PHARMACY   | 6 OJOO STR, ACADEMY                                             | Lagelu            | Oyo |
| 6356 | OY/0327 | OY/0327/S/7  | OKE- ADO HOSPITAL                 | RADIOLOGY  | SW 7/7 IBUKUN OLU ST, OKE-ADO , IBADAN                          | Ibadan South West | Oyo |
| 6357 | OY/0328 | OY/0328/S/7  | ORE- OFE X-RAY CENTRE             | RADIOLOGY  | BLK 1, PLOT 7 BEHIND IBADAN S-W LG SECT. OLUYOLE EST.RING RD,   | Ibadan South West | Oyo |
| 6358 | OY/0334 | OY/0334/S/5  | STRONG TOWER MEDICAL DIAG. LAB    | LABORATORY | SW 9/1150 AGAJE B/STOP, ORITA CHALLENGE ,IBADAN                 | Oluyole           | Oyo |
| 6359 | OY/0340 | OY/0340/S/4  | WEST PHARM. LTD                   | PHARMACY   | 105 OBAFEMI AWOLOWO RD, OKE- ADO. IBADAN                        | Ibadan North West | Oyo |
| 6360 | OY/0342 | OY/0342/S/4  | TALADON NIG. LTD                  | PHARMACY   | 6 QUEEN ELIZABETH RD, MOKOLA, IBADAN                            | Ibadan North West | Oyo |
| 6361 | OY/0345 | OY/0345/S/3  | Chrisbo Medical Centre            |            | House 11, Plot 1, Phase III, Bashorun Estate, Akobo, Ibadan     | Lagelu            | Oyo |
| 6362 | OY/0347 | OY/0347/S/8  | Grace Dental Clinic               | Dental     | Behind Agbowo Shopping Complex Inside Doctor's Clinic UI Ibadan | Ibadan North      | Oyo |
| 6363 | OY/0348 | OY/0348/S/1  | Foremost Base Hospital Limited    |            | 1 Rufai Street N6A/958 Coca Cola Area, Ibadan                   | Ibadan North      | Oyo |
| 6364 | OY/0348 | OY/0348/S/3  | Foremost Base Hospital Limited    |            | 1 Rufai Street N6A/958 Coca Cola Area, Ibadan                   | Ibadan North      | Oyo |
| 6365 | OY/0348 | OY/0348/S/4  | Foremost Base Hospital Limited    |            | 1 Rufai Street N6A/958 Coca Cola Area, Ibadan                   | Ibadan North      | Oyo |
| 6366 | OY/0350 | OY/0350/S/1  | St Rita's Clinic & Maternity Home |            | 9 Maboreje Street, Iwo Road, Ibadan                             | Ibadan North East | Oyo |
| 6367 | OY/0351 | OY/0351/S/13 | Larap Eye Clinic                  | Optometry  | 95 Adeoyo Road, Alawada Junction, Ibadan                        | Ibadan North      | Oyo |
| 6368 | OY/0353 | OY/0353/S/13 | Corporate Eye Clinic              | Optometry  | 20 Aare Avenue, New Bodija, Ibadan                              | Ibadan North      | Oyo |
| 6369 | OY/0354 | OY/0354/S/3  | St Patric's Hospital              |            | 107/780 Idi Ope                                                 | Ibadan North      | Oyo |
| 6370 | OY/0356 | OY/0356/S/1  | T.Z. Medical Centre               | Surgery    | Agbakin Layout, Iwo Road, Ibadan                                | Ibadan North East | Oyo |
| 6371 | OY/0360 | OY/0360/S/2  | KAY KAY SPECIALIST                |            | PLOT 15 BLK 10 ORITA BASHERUN ESTATE,AKOBO IBADAN LAGELU L.G.A  | Lagelu            | Oyo |
| 6372 | OY/0360 | OY/0360/S/1  | KAY KAY SPECIALIST                |            | PLOT 15 BLK 10 ORITA BASHERUN ESTATE,AKOBO IBADAN LAGELU L.G.A  | Lagelu            | Oyo |
| 6373 | OY/0360 | OY/0360/S/15 | KAY KAY SPECIALIST                |            | PLOT 15 BLK 10 ORITA BASHERUN ESTATE,AKOBO IBADAN LAGELU L.G.A  | Lagelu            | Oyo |
| 6374 | OY/0361 | OY/0361/S/1  | Iye Hospital Ltd                  |            | 22 Osibodu Layout Lagos/Ibadan Express Road, Ibadan             | Ibadan South West | Oyo |
| 6375 | OY/0361 | OY/0361/S/3  | Iye Hospital Ltd                  |            | 22 Osibodu Layout Lagos/Ibadan Express Road, Ibadan             | Ibadan South West | Oyo |
| 6376 | OY/0361 | OY/0361/S/6  | Iye Hospital Ltd                  |            | 22 Osibodu Layout Lagos/Ibadan Express Road, Ibadan             | Ibadan South West | Oyo |
| 6377 | OY/0363 | OY/0363/S/3  | Samron Medical Centre             |            | 62 Adebiyi Street, Joyce - B Road off Ring Road Ibadan          | Ibadan South West | Oyo |
| 6378 | OY/0363 | OY/0363/S/5  | Samron Medical Centre             |            | 62 Adebiyi Street, Joyce - B Road off Ring Road Ibadan          | Ibadan South West | Oyo |
| 6379 | OY/0363 | OY/0363/S/2  | Samron Medical Centre             |            | 62 Adebiyi Street, Joyce - B Road off Ring Road Ibadan          | Ibadan South West | Oyo |
| 6380 | OY/0363 | OY/0363/S/1  | Samron Medical Centre             |            | 62 Adebiyi Street, Joyce - B Road off Ring Road Ibadan          | Ibadan South West | Oyo |
| 6381 | OY/0366 | OY/0366/S/2  | St Dominic Catholic Hospital      |            | Ogungbade Village, New Ife Road, Ibadan                         | Egbeda            | Oyo |
| 6382 | OY/0366 | OY/0366/S/5  | St Dominic Catholic Hospital      |            | Ogungbade Village, New Ife Road, Ibadan                         | Egbeda            | Oyo |
| 6383 | OY/0366 | OY/0366/S/3  | St Dominic Catholic Hospital      |            | Ogungbade Village, New Ife Road, Ibadan                         | Egbeda            | Oyo |
| 6384 | OY/0371 | OY/0371/S/13 | Trinity Optometry Clinic          | Optometry  | 23 Ring Road Chemist Bus Stop, Ibadan                           | Ibadan South West | Oyo |
| 6385 | OY/0372 | OY/0372/S/3  | Immaculate Hospital               |            | 23 Odutola Road Off Ososami Road, Oke Ado, Ibadan               | Ibadan South West | Oyo |
| 6386 | OY/0393 | OY/0393/S/7  | Muslim Ummah Hospital             |            | KM 5 Kiamo Road Kisi                                            | Irepo             | Oyo |
| 6387 | OY/0393 | OY/0393/S/4  | Muslim Ummah Hospital             |            | KM 5 Kiamo Road Kisi                                            | Irepo             | Oyo |
| 6388 | OY/0393 | OY/0393/S/1  | Muslim Ummah Hospital             |            | KM 5 Kiamo Road Kisi                                            | Irepo             | Oyo |

|      |         |              |                                                 |               |                                                                                   |                   |     |
|------|---------|--------------|-------------------------------------------------|---------------|-----------------------------------------------------------------------------------|-------------------|-----|
| 6389 | OY/0401 | OY/0401/S/5  | Blossom Biomedical Laboratory                   | Laboratory    | 17 Queen Elizabeth Road, Opp Group Medical, Mokola Roundabout                     | Ibadan North      | Oyo |
| 6390 | OY/0406 | OY/0406/S/1  | Camaria Specialist Hospital                     |               | 13 Camaria Road, Oluwa Bashorun, Ibadan                                           | Ibadan North      | Oyo |
| 6391 | OY/0408 | OY/0408/S/2  | Elyon Sepcialist Clinic                         |               | 72 Iwo Road, Ibadan                                                               | Ibadan North East | Oyo |
| 6392 | OY/0417 | OY/0417/S/10 | Sunnydale Hospital                              |               | 1 Main Avenue, Alalubosa, GRA, Ibadan                                             | Ibadan South West | Oyo |
| 6393 | OY/0421 | OY/0421/S/8  | Ire Ayo Dental Clinic                           | Dental        | 100 Adekunle Fajuyi Street, Suite 28, Danak, Adamasingba, Dugbe, Ibadan           | Ibadan North East | Oyo |
| 6394 | OY/0426 | OY/0426/S/1  | Ayofunmi Hospital and Maternity                 |               | 43 Polytechnic Road, Sango, Ibadan                                                | Ibadan North      | Oyo |
| 6395 | OY/0426 | OY/0426/S/3  | Ayofunmi Hospital and Maternity                 |               | 43 Polytechnic Road, Sango, Ibadan                                                | Ibadan North      | Oyo |
| 6396 | OY/0428 | OY/0428/S/15 | Eleta Eye Institute                             | Ophthalmology | Eleta, Ibadan                                                                     | Ibadan South-East | Oyo |
| 6397 | OY/0429 | OY/0429/S/1  | Vine Branch Maternity and Infant Welfare Centre |               | Plot 4, Block 5, Road 302 Agodi GRA, Ibadan                                       | Ibadan North East | Oyo |
| 6398 | OY/0429 | OY/0429/S/3  | Vine Branch Maternity and Infant Welfare Centre |               | Plot 4, Block 5, Road 302 Agodi GRA, Ibadan                                       | Ibadan North East | Oyo |
| 6399 | OY/0429 | OY/0429/S/6  | Vine Branch Maternity and Infant Welfare Centre |               | Plot 4, Block 5, Road 302 Agodi GRA, Ibadan                                       | Ibadan North East | Oyo |
| 6400 | OY/0434 | OY/0434/S/7  | Aramed Medical Centre                           |               | KM 15, Lagos-Ibadan Expressway, Ibadan                                            | Oluyole           | Oyo |
| 6401 | OY/0434 | OY/0434/S/4  | Aramed Medical Centre                           |               | KM 15, Lagos-Ibadan Expressway, Ibadan                                            | Oluyole           | Oyo |
| 6402 | OY/0434 | OY/0434/S/5  | Aramed Medical Centre                           |               | KM 15, Lagos-Ibadan Expressway, Ibadan                                            | Oluyole           | Oyo |
| 6403 | OY/0434 | OY/0434/S/1  | Aramed Medical Centre                           |               | KM 15, Lagos-Ibadan Expressway, Ibadan                                            | Oluyole           | Oyo |
| 6404 | OY/0434 | OY/0434/S/3  | Aramed Medical Centre                           |               | KM 15, Lagos-Ibadan Expressway, Ibadan                                            | Oluyole           | Oyo |
| 6405 | OY/0435 | OY/0435/S/15 | Foresight Specialist Eye Clinic                 |               | 14, Awosika Avenue, off Awolowo Avenue, Old Bodija, Ibadan                        | Ibadan North      | Oyo |
| 6406 | OY/0438 | OY/0438/S/15 | GFF Eye Clinic and Optical Services             |               | 6/484 Mokola Oremeji, Opposite Premier Hotel Junction, Oyo Road, Ibadan           | Ibadan North      | Oyo |
| 6407 | OY/0439 | OY/0439/S/1  | Hallel Specialist Hospital                      |               | # 11, Ilupeju Estate, Akobo-ojurin, Ibadan.                                       | Lagelu            | Oyo |
| 6408 | OY/0439 | OY/0439/S/3  | Hallel Specialist Hospital                      |               | # 11, Ilupeju Estate, Akobo-ojurin, Ibadan.                                       | Lagelu            | Oyo |
| 6409 | OY/0443 | OY/0443/S/4  | Yewatol Pharmacy                                |               | # 69, Anfani Layout Ibadan                                                        | Ibadan South West | Oyo |
| 6410 | OY/0444 | OY/0444/S/4  | Jare Pharmacy                                   |               | # 1, Hospital Road, Sango Eruwa, Ibadan                                           | Ibarapa Central   | Oyo |
| 6411 | OY/0445 | OY/0445/S/5  | Lifelong Biomedical Diagnostic Centre           |               | Opp Police Barracks playing ground, Police Barracks B/S, Yemetu, Ibadan           | Ibadan North      | Oyo |
| 6412 | OY/0446 | OY/0446/S/4  | St Anne's Specialist Hospital                   |               | #9, Moremi Rd, off Aare Avenue, Bodija, Ibadan                                    | Ibadan North      | Oyo |
| 6413 | OY/0446 | OY/0446/S/3  | St Anne's Specialist Hospital                   |               | #9, Moremi Rd, off Aare Avenue, Bodija, Ibadan                                    | Ibadan North      | Oyo |
| 6414 | OY/0446 | OY/0446/S/5  | St Anne's Specialist Hospital                   |               | #9, Moremi Rd, off Aare Avenue, Bodija, Ibadan                                    | Ibadan North      | Oyo |
| 6415 | OY/0449 | OY/0449/S/2  | Anu Oluwa Specialist Hospital, Ibadan           |               | 19, Bluegate Avenue, Oluyole Estate Extension, Ibadan                             | Ibadan South West | Oyo |
| 6416 | OY/0453 | OY/0453/S/2  | Oluwafemi Specialist Hospital                   |               | Gbogun Owode, Apata, Ibadan, Oyo State                                            | Ido               | Oyo |
| 6417 | OY/0462 | OY/0462/S/5  | The Horizon Hospital                            |               | 23, Odutola Street, Behind Conac Optical Imalefalafia, Oke-Ado, Ibadan, Oyo State | Ibadan South West | Oyo |
| 6418 | OY/0462 | OY/0462/S/3  | The Horizon Hospital                            |               | 23, Odutola Street, Behind Conac Optical Imalefalafia, Oke-Ado, Ibadan, Oyo State | Ibadan South West | Oyo |
| 6419 | OY/0464 | OY/0464/S/5  | Molete Diagnostic & Clinical Services Limited   |               | 270, Obafemi Awolowo Way, Molete, Oyo State                                       | Ibadan South West | Oyo |
| 6420 | OY/0466 | OY/0466/S/3  | Royal Crown Specialist Hospital                 |               | Plot 7, Phase II Akobo, Ibadan, Oyo State                                         | Lagelu            | Oyo |
| 6421 | OY/0472 | OY/0472/S/4  | Omak Pharmacy                                   |               | Suit 1- 2 Victoria's Place JK Bus Stop Agbowo, Ibadan, Oyo State                  | Ibadan North      | Oyo |
| 6422 | OY/0473 | OY/0473/S/4  | Mettlesome Pharmacy                             |               | E7/9496, Babanla Road, Oremeji Agugu, Ibadan, Oyo State                           | Ona-Ara           | Oyo |

|      |         |              |                                     |  |                                                                                      |                   |     |
|------|---------|--------------|-------------------------------------|--|--------------------------------------------------------------------------------------|-------------------|-----|
| 6423 | OY/0475 | OY/0475/S/5  | College Medical Centre              |  | Federal College Of Animal Health And Production Technology Ibadan, Oyo State         | Ibadan South West | Oyo |
| 6424 | OY/0478 | OY/0478/S/13 | Joffany Eye Clinic                  |  | 30, MKO Abiola Way, Anfani Junction, Ring road, Ibadan Oyo State.                    | Ibadan South West | Oyo |
| 6425 | OY/0481 | OY/0481/S/15 | Sight For Life Eye Centre           |  | 1 PDC Housing Estate, General Gas, Akobo, Ibadan Oyo State                           | Lagelu            | Oyo |
| 6426 | OY/0482 | OY/0482/S/5  | Total Care Laboratory Ltd           |  | Number 7, Arulogun Close, Awosika Avenue Bodija, Ibadan Oyo State                    | Ibadan North      | Oyo |
| 6427 | OY/0484 | OY/0484/S/8  | Bozid Dental Clinic                 |  | Suite 58, Jasbeed Mall, Ashi-Bodija, Ibadan Oyo State                                | Ibadan North      | Oyo |
| 6428 | OY/0485 | OY/0485/S/1  | Redeemer's Health Centre            |  | 37 Awolowo Avenue Old Bodija, Ibadan Oyo State                                       | Ibadan North      | Oyo |
| 6429 | OY/0485 | OY/0485/S/14 | Redeemer's Health Centre            |  | 37 Awolowo Avenue Old Bodija, Ibadan Oyo State                                       | Ibadan North      | Oyo |
| 6430 | OY/0486 | OY/0486/S/7  | Pen Atalanta Diagnostic Centre      |  | Ajadi Street, Behind Total Petrol Station, Monatan, Ibadan Oyo State                 | Egbeda            | Oyo |
| 6431 | OY/0486 | OY/0486/S/5  | Pen Atalanta Diagnostic Centre      |  | Ajadi Street, Behind Total Petrol Station, Monatan, Ibadan Oyo State                 | Egbeda            | Oyo |
| 6432 | OY/0492 | OY/0492/S/13 | Designer Eye Clinic                 |  | 130 Oyo Road Opposite Niser Ojoo Ibadan Oyo State                                    | Akinyele          | Oyo |
| 6433 | OY/0495 | OY/0495/S/13 | Epic Eye Care                       |  | Railway Shopping Complex Dugbe, Ibadan Oyo State                                     | Ibadan North West | Oyo |
| 6434 | OY/0499 | OY/0499/S/4  | Hermon Pharmcare Nig. Ltd.          |  | 1 Irepodun Close, Off Ososami New Adeoyo Round About Ring Road Ibadan Oyo State      | Ibadan South West | Oyo |
| 6435 | OY/0502 | OY/0502/S/3  | Delight Hospital & Fertility Centre |  | No. 1, Emmanuel Close, Elewura, Ring road, Ibadan Oyo State                          | Ibadan South West | Oyo |
| 6436 | OY/0502 | OY/0502/S/7  | Delight Hospital & Fertility Centre |  | No. 1, Emmanuel Close, Elewura, Ring road, Ibadan Oyo State                          | Ibadan South West | Oyo |
| 6437 | OY/0504 | OY/0504/S/6  | God's Knot Hospital                 |  | 7, Ologuneru Rd. Iyana Ekerin Beside Police Station Ibadan Oyo State                 | Ido               | Oyo |
| 6438 | OY/0504 | OY/0504/S/1  | God's Knot Hospital                 |  | 7, Ologuneru Rd. Iyana Ekerin Beside Police Station Ibadan Oyo State                 | Ido               | Oyo |
| 6439 | OY/0504 | OY/0504/S/2  | God's Knot Hospital                 |  | 7, Ologuneru Rd. Iyana Ekerin Beside Police Station Ibadan Oyo State                 | Ido               | Oyo |
| 6440 | OY/0504 | OY/0504/S/3  | God's Knot Hospital                 |  | 7, Ologuneru Rd. Iyana Ekerin Beside Police Station Ibadan Oyo State                 | Ido               | Oyo |
| 6441 | OY/0505 | OY/0505/S/13 | Covenant Vision Clinic              |  | 6 Olalekan Alabi Road, Iwo Road, Ibadan Oyo State                                    | Ibadan North East | Oyo |
| 6442 | OY/0506 | OY/0506/S/4  | Global T- Pharmacy & Store          |  | Kumapayi Road ,Olodo Ibadan                                                          | Egbeda            | Oyo |
| 6443 | OY/0508 | OY/0508/S/4  | Central Copharm LTD                 |  | Coopharmacy Building, Opp Police Post Molete Ibadan                                  | Ibadan South West | Oyo |
| 6444 | OY/0509 | OY/0509/S/4  | Olabola Pharmacy                    |  | 50,Abeokuta Road, Odo Ona Ibadan Oyo State                                           | Ibadan South West | Oyo |
| 6445 | OY/0510 | OY/0510/S/4  | Beatmol Pharmacy                    |  | Plot 18,Block 34,Oluoyole Estate ,Ring road Ibadan                                   | Ibadan South West | Oyo |
| 6446 | OY/0511 | OY/0511/S/8  | Jubilee Hospital                    |  | Samonda Market Complex, Sango Behind Oyo State Trade Fair Complex, Ibadan Oyo State. | Ido               | Oyo |
| 6447 | OY/0511 | OY/0511/S/3  | Jubilee Hospital                    |  | Samonda Market Complex, Sango Behind Oyo State Trade Fair Complex, Ibadan Oyo State. | Ido               | Oyo |
| 6448 | OY/0513 | OY/0513/S/3  | Moviv Specialist Hopital Limited    |  | Adetoun Area, Off Eruwa Road Ologuneru Eleyele, Ibadan Oyo State.                    | Ido               | Oyo |
| 6449 | OY/0513 | OY/0513/S/2  | Moviv Specialist Hopital Limited    |  | Adetoun Area, Off Eruwa Road Ologuneru Eleyele, Ibadan Oyo State.                    | Ido               | Oyo |
| 6450 | OY/0513 | OY/0513/S/1  | Moviv Specialist Hopital Limited    |  | Adetoun Area, Off Eruwa Road Ologuneru Eleyele, Ibadan Oyo State.                    | Ido               | Oyo |
| 6451 | OY/0513 | OY/0513/S/5  | Moviv Specialist Hopital Limited    |  | Adetoun Area, Off Eruwa Road Ologuneru Eleyele, Ibadan Oyo State.                    | Ido               | Oyo |



|      |         |              |                                                            |  |                                                                  |                |     |
|------|---------|--------------|------------------------------------------------------------|--|------------------------------------------------------------------|----------------|-----|
| 6452 | OY/0515 | OY/0515/S/4  | Favour-Bel Pharmacy                                        |  | No 5 Akintunde Ighalo Estate Agric. Olomi, Ibadan Oyo State      | Oluyole        | Oyo |
| 6453 | OY/0516 | OY/0516/S/5  | Ayokemi Hospital & ultrasound centre                       |  | Adex Bus/Stop Behind filling Station, Monatan Ibadan, Oyo State. | Lagelu         | Oyo |
| 6454 | OY/0516 | OY/0516/S/6  | Ayokemi Hospital & ultrasound centre                       |  | Adex Bus/Stop Behind filling Station, Monatan Ibadan, Oyo State. | Lagelu         | Oyo |
| 6455 | OY/0516 | OY/0516/S/3  | Ayokemi Hospital & ultrasound centre                       |  | Adex Bus/Stop Behind filling Station, Monatan Ibadan, Oyo State. | Lagelu         | Oyo |
| 6456 | OY/0516 | OY/0516/S/11 | Ayokemi Hospital & ultrasound centre                       |  | Adex Bus/Stop Behind filling Station, Monatan Ibadan, Oyo State. | Lagelu         | Oyo |
| 6457 | OY/0516 | OY/0516/S/14 | Ayokemi Hospital & ultrasound centre                       |  | Adex Bus/Stop Behind filling Station, Monatan Ibadan, Oyo State. | Lagelu         | Oyo |
| 6458 | OY/0516 | OY/0516/S/2  | Ayokemi Hospital & ultrasound centre                       |  | Adex Bus/Stop Behind filling Station, Monatan Ibadan, Oyo State. | Lagelu         | Oyo |
| 6459 | OY/0516 | OY/0516/S/1  | Ayokemi Hospital & ultrasound centre                       |  | Adex Bus/Stop Behind filling Station, Monatan Ibadan, Oyo State. | Lagelu         | Oyo |
| 6460 | OY/0516 | OY/0516/S/8  | Ayokemi Hospital & ultrasound centre                       |  | Adex Bus/Stop Behind filling Station, Monatan Ibadan, Oyo State. | Lagelu         | Oyo |
| 6461 | OY/0518 | OY/0518/S/1  | Ladoke Akintola University of Technology Teaching Hospital |  | Ogbomoso, Oyo State                                              | Ogbomoso North | Oyo |
| 6462 | OY/0518 | OY/0518/S/12 | Ladoke Akintola University of Technology Teaching Hospital |  | Ogbomoso, Oyo State                                              | Ogbomoso North | Oyo |
| 6463 | OY/0518 | OY/0518/S/11 | Ladoke Akintola University of Technology Teaching Hospital |  | Ogbomoso, Oyo State                                              | Ogbomoso North | Oyo |
| 6464 | OY/0518 | OY/0518/S/3  | Ladoke Akintola University of Technology Teaching Hospital |  | Ogbomoso, Oyo State                                              | Ogbomoso North | Oyo |
| 6465 | OY/0518 | OY/0518/S/4  | Ladoke Akintola University of Technology Teaching Hospital |  | Ogbomoso, Oyo State                                              | Ogbomoso North | Oyo |
| 6466 | OY/0518 | OY/0518/S/2  | Ladoke Akintola University of Technology Teaching Hospital |  | Ogbomoso, Oyo State                                              | Ogbomoso North | Oyo |
| 6467 | OY/0518 | OY/0518/S/7  | Ladoke Akintola University of Technology Teaching Hospital |  | Ogbomoso, Oyo State                                              | Ogbomoso North | Oyo |
| 6468 | OY/0518 | OY/0518/S/5  | Ladoke Akintola University of Technology Teaching Hospital |  | Ogbomoso, Oyo State                                              | Ogbomoso North | Oyo |
| 6469 | OY/0518 | OY/0518/S/6  | Ladoke Akintola University of Technology Teaching Hospital |  | Ogbomoso, Oyo State                                              | Ogbomoso North | Oyo |
| 6470 | OY/0518 | OY/0518/S/15 | Ladoke Akintola University of Technology Teaching Hospital |  | Ogbomoso, Oyo State                                              | Ogbomoso North | Oyo |
| 6471 | OY/0520 | OY/0520/S/2  | Ladoke Akintola University Of Technology                   |  | Ilorin Road Ogbomoso Oyo State                                   | Ogbomoso North | Oyo |
| 6472 | OY/0520 | OY/0520/S/3  | Ladoke Akintola University Of Technology                   |  | Ilorin Road Ogbomoso Oyo State                                   | Ogbomoso North | Oyo |
| 6473 | OY/0520 | OY/0520/S/1  | Ladoke Akintola University Of Technology                   |  | Ilorin Road Ogbomoso Oyo State                                   | Ogbomoso North | Oyo |
| 6474 | OY/0520 | OY/0520/S/15 | Ladoke Akintola University Of Technology                   |  | Ilorin Road Ogbomoso Oyo State                                   | Ogbomoso North | Oyo |
| 6475 | OY/0520 | OY/0520/S/12 | Ladoke Akintola University Of Technology                   |  | Ilorin Road Ogbomoso Oyo State                                   | Ogbomoso North | Oyo |
| 6476 | OY/0520 | OY/0520/S/11 | Ladoke Akintola University Of Technology                   |  | Ilorin Road Ogbomoso Oyo State                                   | Ogbomoso North | Oyo |
| 6477 | OY/0520 | OY/0520/S/7  | Ladoke Akintola University Of Technology                   |  | Ilorin Road Ogbomoso Oyo State                                   | Ogbomoso North | Oyo |

|      |         |              |                                          |          |                                                               |                   |         |
|------|---------|--------------|------------------------------------------|----------|---------------------------------------------------------------|-------------------|---------|
| 6478 | OY/0520 | OY/0520/S/6  | Ladoke Akintola University Of Technology |          | Ilorin Road Ogbomosho Oyo State                               | Ogbomosho North   | Oyo     |
| 6479 | OY/0520 | OY/0520/S/5  | Ladoke Akintola University Of Technology |          | Ilorin Road Ogbomosho Oyo State                               | Ogbomosho North   | Oyo     |
| 6480 | OY/0520 | OY/0520/S/4  | Ladoke Akintola University Of Technology |          | Ilorin Road Ogbomosho Oyo State                               | Ogbomosho North   | Oyo     |
| 6481 | OY/0523 | OY/0523/S/10 | Popular Hospital                         |          | 34, Arigidi Street, Old Bodija, Ibadan Oyo State              | Ibadan North      | Oyo     |
| 6482 | OY/0524 | OY/0524/S/3  | Sure Hope Clinic                         |          | Carpenter Bus Stop, Ologuneru Eruwa Road Ibadan, Oyo State    | Ido               | Oyo     |
| 6483 | OY/0525 | OY/0525/S/3  | Iremm Medical Centre                     |          | 3, Irekari Estate, Oluyole                                    | Oluyole           | Oyo     |
| 6484 | OY/0526 | OY/0526/S/13 | Conac Optical                            |          | 130, Obafemi Awolowo Oke Ado, Ibadan Oyo State                | Ibadan North West | Oyo     |
| 6485 | OY/0527 | OY/0527/S/5  | Lab Master Diagnostic Center             |          | 516, Tolulope Plaza JK Bustop, Bodija, Ibadan                 | Ibadan North      | Oyo     |
| 6486 | OY/0529 | OY/0529/S/4  | Gracepath K Venture & Pharmacy           |          | Suite 4, To God be the Glory Forever shopping complex, Ibadan | Ido               | Oyo     |
| 6487 | OY/0531 | OY/0531/S/7  | Total Care Diagnostic Centre             |          | 7, Arulogun Close Old Bodija, Ibadan                          | Ibadan North      | Oyo     |
| 6488 | OY/0531 | OY/0531/S/5  | Total Care Diagnostic Centre             |          | 7, Arulogun Close Old Bodija, Ibadan                          | Ibadan North      | Oyo     |
| 6489 | PL/0007 | PL/0007/S/3  | Eldin Specialist Hospital                |          | 12 Dogon Dutse Road, Jos                                      | Jos North         | Plateau |
| 6490 | PL/0007 | PL/0007/S/4  | Eldin Specialist Hospital                |          | 12 Dogon Dutse Road, Jos                                      | Jos North         | Plateau |
| 6491 | PL/0007 | PL/0007/S/7  | Eldin Specialist Hospital                |          | 12 Dogon Dutse Road, Jos                                      | Jos North         | Plateau |
| 6492 | PL/0007 | PL/0007/S/5  | Eldin Specialist Hospital                |          | 12 Dogon Dutse Road, Jos                                      | Jos North         | Plateau |
| 6493 | PL/0009 | PL/0009/S/5  | Sauki Clinic & Hospital                  |          | Joseph Gomwalk Road                                           | Jos North         | Plateau |
| 6494 | PL/0009 | PL/0009/S/2  | Sauki Clinic & Hospital                  |          | Joseph Gomwalk Road                                           | Jos North         | Plateau |
| 6495 | PL/0010 | PL/0010/S/3  | Kauna Hospital                           |          | 35 Ahmadu Bello Way, On Rwang-Pam                             | Jos North         | Plateau |
| 6496 | PL/0011 | PL/0011/S/4  | General Hospital, Langtang               |          | Langtang, Jos                                                 | Jos North         | Plateau |
| 6497 | PL/0011 | PL/0011/S/8  | General Hospital, Langtang               |          | Langtang, Jos                                                 | Jos North         | Plateau |
| 6498 | PL/0011 | PL/0011/S/1  | General Hospital, Langtang               |          | Langtang, Jos                                                 | Jos North         | Plateau |
| 6499 | PL/0011 | PL/0011/S/5  | General Hospital, Langtang               |          | Langtang, Jos                                                 | Jos North         | Plateau |
| 6500 | PL/0014 | PL/0014/S/7  | Chillas Specialist Hospital              |          | 20 Zaria Bye Pass, Jos                                        | Pankshin          | Plateau |
| 6501 | PL/0014 | PL/0014/S/4  | Chillas Specialist Hospital              |          | 20 Zaria Bye Pass, Jos                                        | Pankshin          | Plateau |
| 6502 | PL/0014 | PL/0014/S/1  | Chillas Specialist Hospital              |          | 20 Zaria Bye Pass, Jos                                        | Pankshin          | Plateau |
| 6503 | PL/0014 | PL/0014/S/3  | Chillas Specialist Hospital              |          | 20 Zaria Bye Pass, Jos                                        | Pankshin          | Plateau |
| 6504 | PL/0015 | PL/0015/S/1  | General Hospital, Pankshin               |          | Pankshin                                                      | Pankshin          | Plateau |
| 6505 | PL/0015 | PL/0015/S/5  | General Hospital, Pankshin               |          | Pankshin                                                      | Pankshin          | Plateau |
| 6506 | PL/0015 | PL/0015/S/8  | General Hospital, Pankshin               |          | Pankshin                                                      | Pankshin          | Plateau |
| 6507 | PL/0015 | PL/0015/S/7  | General Hospital, Pankshin               |          | Pankshin                                                      | Pankshin          | Plateau |
| 6508 | PL/0015 | PL/0015/S/2  | General Hospital, Pankshin               |          | Pankshin                                                      | Pankshin          | Plateau |
| 6509 | PL/0018 | PL/0018/S/1  | Alpha Medical Centre                     |          | 7, Delimi Street, Jos                                         | Jos North         | Plateau |
| 6510 | PL/0018 | PL/0018/S/3  | Alpha Medical Centre                     |          | 7, Delimi Street, Jos                                         | Jos North         | Plateau |
| 6511 | PL/0019 | PL/0019/S/15 | Adoose Specialist Hospital               |          | 25, Ibrahim Dasuki Street                                     | Jos North         | Plateau |
| 6512 | PL/0022 | PL/0022/S/4  | General Hospital, Shendam                |          | Shendam                                                       | Shendam           | Plateau |
| 6513 | PL/0022 | PL/0022/S/8  | General Hospital, Shendam                |          | Shendam                                                       | Shendam           | Plateau |
| 6514 | PL/0022 | PL/0022/S/7  | General Hospital, Shendam                |          | Shendam                                                       | Shendam           | Plateau |
| 6515 | PL/0026 | PL/0026/S/4  | Lamed Pharmacy                           | Pharmacy | Bauchi Road                                                   | Jos North         | Plateau |
| 6516 | PL/0029 | PL/0029/S/4  | De-Havilah Pharmacy Ltd.                 | Pharmacy | KB 79T Gada Biu, Jos                                          | Jos North         | Plateau |
| 6517 | PL/0032 | PL/0032/S/4  | Lizcon Pharmacy                          | Pharmacy | Infront of Plateau Poly, Jos                                  | Jos North         | Plateau |
| 6518 | PL/0033 | PL/0033/S/4  | Dajobek Pharm. Ltd.                      | Pharmacy | 71, Yakubu Gowon Way, Dadin Kowa, Jos                         | Jos North         | Plateau |
| 6519 | PL/0035 | PL/0035/S/4  | Barns Pharmacy & Chem. Ltd.              | Pharmacy | Barkin Ladi Road. Bukuru, Jos                                 | Jos South         | Plateau |

|      |         |              |                                           |                  |                                                     |              |         |
|------|---------|--------------|-------------------------------------------|------------------|-----------------------------------------------------|--------------|---------|
| 6520 | PL/0036 | PL/0036/S/4  | Tinna Pharmaceuticals Chemist             | Pharmacy         | NO. 18 Ahmadu Bello Way, Jos                        | Jos North    | Plateau |
| 6521 | PL/0039 | PL/0039/S/8  | Dental Clinic                             | Dental           | Ibrahim Taiwo Road, Beside Specialist Hospital, Jos | Jos North    | Plateau |
| 6522 | PL/0041 | PL/0041/S/4  | Water Shade Stores                        | Pharmacy         | 4, Maingo Road, Jos                                 | Jos North    | Plateau |
| 6523 | PL/0043 | PL/0043/S/4  | Micony Nig. Ltd.                          | Pharmacy         | 24, Beach Road, Jos                                 | Jos North    | Plateau |
| 6524 | PL/0045 | PL/0045/S/4  | Dumjos Nig. Ltd.                          | Pharmacy         | 27, Ahmadu Bello Way, Jos                           | Jos North    | Plateau |
| 6525 | PL/0046 | PL/0046/S/4  | Ice Me Central Pharmacy                   | Pharmacy         | 12, Murtala Mohammed Way, Opp. Juth, Jos            | Jos North    | Plateau |
| 6526 | PL/0048 | PL/0048/S/4  | Barkin Ladi Pharmacy                      | Pharmacy         | 19, Lawrence Onaja Road, Barkin Ladi                | Barikin Ladi | Plateau |
| 6527 | PL/0054 | PL/0054/S/4  | Orit Pharmacy                             | Pharmacy         | 7, Old Airport Road, Junction, Jos                  | Jos North    | Plateau |
| 6528 | PL/0055 | PL/0055/S/4  | Pfamex Nig. Ltd.                          | Pharmacy         | 4, Mission Street, Jos                              | Jos North    | Plateau |
| 6529 | PL/0058 | PL/0058/S/3  | 463 Nigerian Airforce Hospital            |                  | NAF Station, Jos                                    | Jos North    | Plateau |
| 6530 | PL/0058 | PL/0058/S/6  | 463 Nigerian Airforce Hospital            |                  | NAF Station, Jos                                    | Jos North    | Plateau |
| 6531 | PL/0058 | PL/0058/S/1  | 463 Nigerian Airforce Hospital            |                  | NAF Station, Jos                                    | Jos North    | Plateau |
| 6532 | PL/0058 | PL/0058/S/5  | 463 Nigerian Airforce Hospital            |                  | NAF Station, Jos                                    | Jos North    | Plateau |
| 6533 | PL/0058 | PL/0058/S/2  | 463 Nigerian Airforce Hospital            |                  | NAF Station, Jos                                    | Jos North    | Plateau |
| 6534 | PL/0058 | PL/0058/S/7  | 463 Nigerian Airforce Hospital            |                  | NAF Station, Jos                                    | Jos North    | Plateau |
| 6535 | PL/0058 | PL/0058/S/4  | 463 Nigerian Airforce Hospital            |                  | NAF Station, Jos                                    | Jos North    | Plateau |
| 6536 | PL/0058 | PL/0058/S/11 | 463 Nigerian Airforce Hospital            |                  | NAF Station, Jos                                    | Jos North    | Plateau |
| 6537 | PL/0058 | PL/0058/S/15 | 463 Nigerian Airforce Hospital            |                  | NAF Station, Jos                                    | Jos North    | Plateau |
| 6538 | PL/0058 | PL/0058/S/8  | 463 Nigerian Airforce Hospital            |                  | NAF Station, Jos                                    | Jos North    | Plateau |
| 6539 | PL/0064 | PL/0064/S/4  | University of Jos Health Centre           |                  | Jos, Plateau State                                  | Jos North    | Plateau |
| 6540 | PL/0064 | PL/0064/S/5  | University of Jos Health Centre           |                  | Jos, Plateau State                                  | Jos North    | Plateau |
| 6541 | PL/0067 | PL/0067/S/7  | Matanmi Hospital                          | Primary Provider | 89 Masallachin Juma" a Jos                          | Jos North    | Plateau |
| 6542 | PL/0070 | PL/0070/S/3  | Nissi Dominus Medical Centre              | Primary Provider | Jaktu Estate Mangu                                  | Mangu        | Plateau |
| 6543 | PL/0070 | PL/0070/S/2  | Nissi Dominus Medical Centre              | Primary Provider | Jaktu Estate Mangu                                  | Mangu        | Plateau |
| 6544 | PL/0070 | PL/0070/S/1  | Nissi Dominus Medical Centre              | Primary Provider | Jaktu Estate Mangu                                  | Mangu        | Plateau |
| 6545 | PL/0070 | PL/0070/S/5  | Nissi Dominus Medical Centre              | Primary Provider | Jaktu Estate Mangu                                  | Mangu        | Plateau |
| 6546 | PL/0072 | PL/0072/S/5  | Samantha Lucil Hospital                   | Primary Provider | 16, Enugu-Agidi street Jos                          | Jos North    | Plateau |
| 6547 | PL/0072 | PL/0072/S/3  | Samantha Lucil Hospital                   | Primary Provider | 16, Enugu-Agidi street Jos                          | Jos North    | Plateau |
| 6548 | PL/0072 | PL/0072/S/1  | Samantha Lucil Hospital                   | Primary Provider | 16, Enugu-Agidi street Jos                          | Jos North    | Plateau |
| 6549 | PL/0075 | PL/0075/S/4  | Our Lady Of Apostle Hospital ( O. L. A. ) | Primary Provider | 1 Zaria By pass Jos                                 | Jos North    | Plateau |
| 6550 | PL/0075 | PL/0075/S/10 | Our Lady Of Apostle Hospital ( O. L. A. ) | Primary Provider | 1 Zaria By pass Jos                                 | Jos North    | Plateau |
| 6551 | PL/0075 | PL/0075/S/15 | Our Lady Of Apostle Hospital ( O. L. A. ) | Primary Provider | 1 Zaria By pass Jos                                 | Jos North    | Plateau |
| 6552 | PL/0075 | PL/0075/S/11 | Our Lady Of Apostle Hospital ( O. L. A. ) | Primary Provider | 1 Zaria By pass Jos                                 | Jos North    | Plateau |
| 6553 | PL/0075 | PL/0075/S/2  | Our Lady Of Apostle Hospital ( O. L. A. ) | Primary Provider | 1 Zaria By pass Jos                                 | Jos North    | Plateau |
| 6554 | PL/0075 | PL/0075/S/6  | Our Lady Of Apostle Hospital ( O. L. A. ) | Primary Provider | 1 Zaria By pass Jos                                 | Jos North    | Plateau |
| 6555 | PL/0075 | PL/0075/S/1  | Our Lady Of Apostle Hospital ( O. L. A. ) | Primary Provider | 1 Zaria By pass Jos                                 | Jos North    | Plateau |
| 6556 | PL/0075 | PL/0075/S/3  | Our Lady Of Apostle Hospital ( O. L. A. ) | Primary Provider | 1 Zaria By pass Jos                                 | Jos North    | Plateau |
| 6557 | PL/0075 | PL/0075/S/5  | Our Lady Of Apostle Hospital ( O. L. A. ) | Primary Provider | 1 Zaria By pass Jos                                 | Jos North    | Plateau |
| 6558 | PL/0076 | PL/0076/S/6  | Solat Women Hospital                      | Primary Provider | 44 Kashim Ibrahim Street Jos                        | Jos North    | Plateau |
| 6559 | PL/0076 | PL/0076/S/3  | Solat Women Hospital                      | Primary Provider | 44 Kashim Ibrahim Street Jos                        | Jos North    | Plateau |
| 6560 | PL/0078 | PL/0078/S/4  | Federal Lowcost Clinic And Maternity      | Primary Provider | Federal Lowcost Miango Road Jos                     | Jos South    | Plateau |
| 6561 | PL/0078 | PL/0078/S/5  | Federal Lowcost Clinic And Maternity      | Primary Provider | Federal Lowcost Miango Road Jos                     | Jos South    | Plateau |
| 6562 | PL/0080 | PL/0080/S/2  | Lawrak Hospital                           | Primary Provider | 21, Temple Road Off Miango Road Jos                 | Jos South    | Plateau |
| 6563 | PL/0080 | PL/0080/S/1  | Lawrak Hospital                           | Primary Provider | 21, Temple Road Off Miango Road Jos                 | Jos South    | Plateau |
| 6564 | PL/0084 | PL/0084/S/8  | Hopmat Dental Clinic                      | Dental           | 12 Beach Rd Jos                                     | Jos North    | Plateau |

|      |         |              |                                           |                    |                                                         |           |         |
|------|---------|--------------|-------------------------------------------|--------------------|---------------------------------------------------------|-----------|---------|
| 6565 | PL/0085 | PL/0085/S/4  | Monterri Pharmacy Ltd                     | Pharmacy           | 26 Miango Rd Kufang                                     | Jos South | Plateau |
| 6566 | PL/0088 | PL/0088/S/4  | Choosey Pharmacy                          | Pharmacy           | 69/21 Masalachi Jumaa Jos                               | Jos North | Plateau |
| 6567 | PL/0090 | PL/0090/S/5  | Ebikon Medical Dagnostic Laboratory       | Laboratory         | 10T Rukuba Rd Kayus House Rukuba Rd Jos                 | Jos North | Plateau |
| 6568 | PL/0094 | PL/0094/S/4  | Yachi Pharmacy                            | Pharmacy           | 2 Old Bukuru Rd Sabon Barki Jos                         | Jos South | Plateau |
| 6569 | PL/0095 | PL/0095/S/13 | Niger Optical Services Company            | Optometry          | 61/14B Bauchi Rd Zololo Junction Jos                    | Jos North | Plateau |
| 6570 | PL/0100 | PL/0100/S/7  | Jos University Teaching Hospital          |                    | Murtala Mohammed Way, Jos                               | Jos North | Plateau |
| 6571 | PL/0100 | PL/0100/S/11 | Jos University Teaching Hospital          |                    | Murtala Mohammed Way, Jos                               | Jos North | Plateau |
| 6572 | PL/0100 | PL/0100/S/2  | Jos University Teaching Hospital          |                    | Murtala Mohammed Way, Jos                               | Jos North | Plateau |
| 6573 | PL/0100 | PL/0100/S/1  | Jos University Teaching Hospital          |                    | Murtala Mohammed Way, Jos                               | Jos North | Plateau |
| 6574 | PL/0100 | PL/0100/S/5  | Jos University Teaching Hospital          |                    | Murtala Mohammed Way, Jos                               | Jos North | Plateau |
| 6575 | PL/0100 | PL/0100/S/3  | Jos University Teaching Hospital          |                    | Murtala Mohammed Way, Jos                               | Jos North | Plateau |
| 6576 | PL/0100 | PL/0100/S/6  | Jos University Teaching Hospital          |                    | Murtala Mohammed Way, Jos                               | Jos North | Plateau |
| 6577 | PL/0100 | PL/0100/S/13 | Jos University Teaching Hospital          |                    | Murtala Mohammed Way, Jos                               | Jos North | Plateau |
| 6578 | PL/0102 | PL/0102/S/15 | Plateau Specialist Hospital               |                    | Jos, Plateau State                                      | Jos North | Plateau |
| 6579 | PL/0102 | PL/0102/S/1  | Plateau Specialist Hospital               |                    | Jos, Plateau State                                      | Jos North | Plateau |
| 6580 | PL/0102 | PL/0102/S/7  | Plateau Specialist Hospital               |                    | Jos, Plateau State                                      | Jos North | Plateau |
| 6581 | PL/0102 | PL/0102/S/6  | Plateau Specialist Hospital               |                    | Jos, Plateau State                                      | Jos North | Plateau |
| 6582 | PL/0102 | PL/0102/S/4  | Plateau Specialist Hospital               |                    | Jos, Plateau State                                      | Jos North | Plateau |
| 6583 | PL/0102 | PL/0102/S/3  | Plateau Specialist Hospital               |                    | Jos, Plateau State                                      | Jos North | Plateau |
| 6584 | PL/0102 | PL/0102/S/5  | Plateau Specialist Hospital               |                    | Jos, Plateau State                                      | Jos North | Plateau |
| 6585 | PL/0108 | PL/0108/S/1  | Hwolshe Medical Centre                    |                    | Tudun Wada Ring Road, P O Box 8103, Anglo, Jos.         | Jos South | Plateau |
| 6586 | PL/0108 | PL/0108/S/3  | Hwolshe Medical Centre                    |                    | Tudun Wada Ring Road, P O Box 8103, Anglo, Jos.         | Jos South | Plateau |
| 6587 | PL/0108 | PL/0108/S/2  | Hwolshe Medical Centre                    |                    | Tudun Wada Ring Road, P O Box 8103, Anglo, Jos.         | Jos South | Plateau |
| 6588 | PL/0116 | PL/0116/S/5  | Focus Hospital                            |                    | No. 7 NEPA Close, Tudun Wada Layout, Jos                | Jos North | Plateau |
| 6589 | PL/0121 | PL/0121/S/5  | Vom Christian Hospital                    |                    | Vom, Plateau State                                      | Jos South | Plateau |
| 6590 | PL/0121 | PL/0121/S/4  | Vom Christian Hospital                    |                    | Vom, Plateau State                                      | Jos South | Plateau |
| 6591 | PL/0121 | PL/0121/S/3  | Vom Christian Hospital                    |                    | Vom, Plateau State                                      | Jos South | Plateau |
| 6592 | PL/0121 | PL/0121/S/1  | Vom Christian Hospital                    |                    | Vom, Plateau State                                      | Jos South | Plateau |
| 6593 | PL/0121 | PL/0121/S/7  | Vom Christian Hospital                    |                    | Vom, Plateau State                                      | Jos South | Plateau |
| 6594 | PL/0124 | PL/0124/S/7  | Skane Radio-Diagnostic Centre Nig. Ltd    | Radiology/Sonology | 32B Ibrahim Taiwo Road, Jos, Opp. Plateau Hospital, Jos | Jos North | Plateau |
| 6595 | PL/0125 | PL/0125/S/1  | Mozad-Jones Pharmacy Ltd                  | Pharmacy           | 32, Ahmadu Bello Way, Jos                               | Jos North | Plateau |
| 6596 | PL/0128 | PL/0128/S/8  | Stan Fields Dental Clinic                 | Dental Surgery     | 22, Zaria Crescent Off Zaria Bye-Pass, Jos              | Jos North | Plateau |
| 6597 | PL/0129 | PL/0129/S/4  | Jora Pharmacy Ltd                         | Pharmacy           | 13, Tudun Wada Ring Road, Jos                           | Jos North | Plateau |
| 6598 | PL/0133 | PL/0133/S/4  | GYFT'S Pharmacy Ltd                       | Pharmacy           | Plot 20 Block Y Opp. ITFH Quarters, Jos                 | Mangu     | Plateau |
| 6599 | PL/0134 | PL/0134/S/4  | Tahaf Pharmacy                            | Pharmacy           | 10, Murtala Mohammed Way, Opp. JUTH, Jos                | Jos North | Plateau |
| 6600 | PL/0135 | PL/0135/S/4  | Trasure Base Pharmacy Ltd                 | Pharmacy           | 24, Murtala Mohammed Way, Jos                           | Jos North | Plateau |
| 6601 | PL/0136 | PL/0136/S/4  | Elyon Pharmacy                            | Pharmacy           | 12, CBN Road Opp House of Assembly, Jos                 | Jos North | Plateau |
| 6602 | PL/0137 | PL/0137/S/4  | Sali Pharmacy                             | Pharmacy           | 8, Jos Road, Opp. First Bank, Bukuru, Jos               | Shendam   | Plateau |
| 6603 | PL/0138 | PL/0138/S/4  | Sali Pharmacy                             | Pharmacy           | 6, Solomon Lar Way, Shendam, Jos                        | Shendam   | Plateau |
| 6604 | PL/0148 | PL/0148/S/5  | Mandela Klinik                            |                    | Beside Police Station K/Vom                             | Jos South | Plateau |
| 6605 | PL/0150 | PL/0150/S/1  | Bingham University Teaching Hospital, Jos |                    | 23 Zaria By Pass, Jos                                   | Jos North | Plateau |
| 6606 | PL/0150 | PL/0150/S/2  | Bingham University Teaching Hospital, Jos |                    | 23 Zaria By Pass, Jos                                   | Jos North | Plateau |

|      |         |              |                                           |          |                                                                          |           |         |
|------|---------|--------------|-------------------------------------------|----------|--------------------------------------------------------------------------|-----------|---------|
| 6607 | PL/0150 | PL/0150/S/4  | Bingham University Teaching Hospital, Jos |          | 23 Zaria By Pass, Jos                                                    | Jos North | Plateau |
| 6608 | PL/0150 | PL/0150/S/7  | Bingham University Teaching Hospital, Jos |          | 23 Zaria By Pass, Jos                                                    | Jos North | Plateau |
| 6609 | PL/0150 | PL/0150/S/15 | Bingham University Teaching Hospital, Jos |          | 23 Zaria By Pass, Jos                                                    | Jos North | Plateau |
| 6610 | PL/0150 | PL/0150/S/12 | Bingham University Teaching Hospital, Jos |          | 23 Zaria By Pass, Jos                                                    | Jos North | Plateau |
| 6611 | PL/0150 | PL/0150/S/8  | Bingham University Teaching Hospital, Jos |          | 23 Zaria By Pass, Jos                                                    | Jos North | Plateau |
| 6612 | PL/0150 | PL/0150/S/6  | Bingham University Teaching Hospital, Jos |          | 23 Zaria By Pass, Jos                                                    | Jos North | Plateau |
| 6613 | PL/0150 | PL/0150/S/3  | Bingham University Teaching Hospital, Jos |          | 23 Zaria By Pass, Jos                                                    | Jos North | Plateau |
| 6614 | PL/0153 | PL/0153/S/3  | Graceville Royal Hospitals                |          | 23T Unity Lane, Dadin Kowa, Jos                                          | Jos South | Plateau |
| 6615 | PL/0153 | PL/0153/S/1  | Graceville Royal Hospitals                |          | 23T Unity Lane, Dadin Kowa, Jos                                          | Jos South | Plateau |
| 6616 | PL/0154 | PL/0154/S/4  | Ehigocho Pharmacy                         | Pharmacy | Yingi Village, Rayafield, Jos                                            | Jos North | Plateau |
| 6617 | PL/0157 | PL/0157/S/5  | Gaccon Hospital & Maternity               |          | 2 Alheri Police Station, Jos, Plateau State.                             | Jos North | Plateau |
| 6618 | PL/0157 | PL/0157/S/2  | Gaccon Hospital & Maternity               |          | 2 Alheri Police Station, Jos, Plateau State.                             | Jos North | Plateau |
| 6619 | PL/0157 | PL/0157/S/1  | Gaccon Hospital & Maternity               |          | 2 Alheri Police Station, Jos, Plateau State.                             | Jos North | Plateau |
| 6620 | PL/0157 | PL/0157/S/3  | Gaccon Hospital & Maternity               |          | 2 Alheri Police Station, Jos, Plateau State.                             | Jos North | Plateau |
| 6621 | PL/0157 | PL/0157/S/6  | Gaccon Hospital & Maternity               |          | 2 Alheri Police Station, Jos, Plateau State.                             | Jos North | Plateau |
| 6622 | PL/0158 | PL/0158/S/1  | Dee Medical Centre                        |          | Plot BP 1669/21 Bukuru Express way, Off Kugiya Road, Jos, Plateau State. | Jos South | Plateau |
| 6623 | PL/0158 | PL/0158/S/4  | Dee Medical Centre                        |          | Plot BP 1669/21 Bukuru Express way, Off Kugiya Road, Jos, Plateau State. | Jos South | Plateau |
| 6624 | PL/0158 | PL/0158/S/3  | Dee Medical Centre                        |          | Plot BP 1669/21 Bukuru Express way, Off Kugiya Road, Jos, Plateau State. | Jos South | Plateau |
| 6625 | PL/0158 | PL/0158/S/5  | Dee Medical Centre                        |          | Plot BP 1669/21 Bukuru Express way, Off Kugiya Road, Jos, Plateau State. | Jos South | Plateau |
| 6626 | PL/0158 | PL/0158/S/2  | Dee Medical Centre                        |          | Plot BP 1669/21 Bukuru Express way, Off Kugiya Road, Jos, Plateau State. | Jos South | Plateau |
| 6627 | PL/0158 | PL/0158/S/15 | Dee Medical Centre                        |          | Plot BP 1669/21 Bukuru Express way, Off Kugiya Road, Jos, Plateau State. | Jos South | Plateau |
| 6628 | PL/0159 | PL/0159/S/2  | Fertile Ground Hospital                   |          | Plot 1234, Zaramaganda, Jos, Adjacent Golden Bread, Plateau State.       | Jos South | Plateau |
| 6629 | PL/0159 | PL/0159/S/6  | Fertile Ground Hospital                   |          | Plot 1234, Zaramaganda, Jos, Adjacent Golden Bread, Plateau State.       | Jos South | Plateau |
| 6630 | PL/0159 | PL/0159/S/3  | Fertile Ground Hospital                   |          | Plot 1234, Zaramaganda, Jos, Adjacent Golden Bread, Plateau State.       | Jos South | Plateau |
| 6631 | PL/0159 | PL/0159/S/1  | Fertile Ground Hospital                   |          | Plot 1234, Zaramaganda, Jos, Adjacent Golden Bread, Plateau State.       | Jos South | Plateau |
| 6632 | PL/0161 | PL/0161/S/6  | Marysol Specialist Hospital               |          | Kwang Delimi, Off Rayfield Resort Road, Jos, Plateau State.              | Jos South | Plateau |
| 6633 | PL/0161 | PL/0161/S/1  | Marysol Specialist Hospital               |          | Kwang Delimi, Off Rayfield Resort Road, Jos, Plateau State.              | Jos South | Plateau |
| 6634 | PL/0161 | PL/0161/S/3  | Marysol Specialist Hospital               |          | Kwang Delimi, Off Rayfield Resort Road, Jos, Plateau State.              | Jos South | Plateau |
| 6635 | PL/0161 | PL/0161/S/2  | Marysol Specialist Hospital               |          | Kwang Delimi, Off Rayfield Resort Road, Jos, Plateau State.              | Jos South | Plateau |
| 6636 | PL/0161 | PL/0161/S/5  | Marysol Specialist Hospital               |          | Kwang Delimi, Off Rayfield Resort Road, Jos, Plateau State.              | Jos South | Plateau |
| 6637 | PL/0161 | PL/0161/S/4  | Marysol Specialist Hospital               |          | Kwang Delimi, Off Rayfield Resort Road, Jos, Plateau State.              | Jos South | Plateau |
| 6638 | PL/0162 | PL/0162/S/10 | Rayfield Medical Service LTD              |          | 30, Raphael Davon Street, Rayfield Jos, Plateau State.                   | Jos South | Plateau |

|      |         |              |                                                     |  |                                                                                       |                |         |
|------|---------|--------------|-----------------------------------------------------|--|---------------------------------------------------------------------------------------|----------------|---------|
| 6639 | PL/0162 | PL/0162/S/3  | Rayfield Medical Service LTD                        |  | 30, Raphael Davon Street, Rayfield Jos, Plateau State.                                | Jos South      | Plateau |
| 6640 | PL/0162 | PL/0162/S/5  | Rayfield Medical Service LTD                        |  | 30, Raphael Davon Street, Rayfield Jos, Plateau State.                                | Jos South      | Plateau |
| 6641 | PL/0162 | PL/0162/S/6  | Rayfield Medical Service LTD                        |  | 30, Raphael Davon Street, Rayfield Jos, Plateau State.                                | Jos South      | Plateau |
| 6642 | PL/0162 | PL/0162/S/15 | Rayfield Medical Service LTD                        |  | 30, Raphael Davon Street, Rayfield Jos, Plateau State.                                | Jos South      | Plateau |
| 6643 | PL/0162 | PL/0162/S/1  | Rayfield Medical Service LTD                        |  | 30, Raphael Davon Street, Rayfield Jos, Plateau State.                                | Jos South      | Plateau |
| 6644 | PL/0162 | PL/0162/S/4  | Rayfield Medical Service LTD                        |  | 30, Raphael Davon Street, Rayfield Jos, Plateau State.                                | Jos South      | Plateau |
| 6645 | PL/0163 | PL/0163/S/2  | Adventist Health International                      |  | Seventh Day Adventist Hospital, Jengre, Plateau State.                                | Bassa          | Kogi    |
| 6646 | PL/0163 | PL/0163/S/3  | Adventist Health International                      |  | Seventh Day Adventist Hospital, Jengre, Plateau State.                                | Bassa          | Kogi    |
| 6647 | PL/0163 | PL/0163/S/4  | Adventist Health International                      |  | Seventh Day Adventist Hospital, Jengre, Plateau State.                                | Bassa          | Kogi    |
| 6648 | PL/0163 | PL/0163/S/1  | Adventist Health International                      |  | Seventh Day Adventist Hospital, Jengre, Plateau State.                                | Bassa          | Kogi    |
| 6649 | PL/0163 | PL/0163/S/5  | Adventist Health International                      |  | Seventh Day Adventist Hospital, Jengre, Plateau State.                                | Bassa          | Kogi    |
| 6650 | PL/0167 | PL/0167/S/5  | Parkview Family Medicine Royal Hospital             |  | By Solomon Lar Amusement Park, Domkat Bali Way, Jos, Plateau State                    | Jos South      | Plateau |
| 6651 | PL/0167 | PL/0167/S/3  | Parkview Family Medicine Royal Hospital             |  | By Solomon Lar Amusement Park, Domkat Bali Way, Jos, Plateau State                    | Jos South      | Plateau |
| 6652 | PL/0167 | PL/0167/S/4  | Parkview Family Medicine Royal Hospital             |  | By Solomon Lar Amusement Park, Domkat Bali Way, Jos, Plateau State                    | Jos South      | Plateau |
| 6653 | PL/0169 | PL/0169/S/3  | Hope Hill Specialist Medical Centre                 |  | No. 7C, Hospital Place, Opp. Four Square Gospel Church, Along Green Valley Hotel, Jos | Jos North      | Plateau |
| 6654 | PL/0169 | PL/0169/S/1  | Hope Hill Specialist Medical Centre                 |  | No. 7C, Hospital Place, Opp. Four Square Gospel Church, Along Green Valley Hotel, Jos | Jos North      | Plateau |
| 6655 | PL/0170 | PL/0170/S/8  | Regional Centre for Oral Health for Africa (RCORTI) |  | 3, CBN rd., Jos Plateau State                                                         | Jos North      | Plateau |
| 6656 | PL/0171 | PL/0171/S/3  | Al Noor Clinic & Maternity                          |  | 5, Madara Junction Angwan Rogo Jos Plateau State                                      | Langtang North | Plateau |
| 6657 | RV/0001 | RV/0001/S/3  | Olivet Clinic                                       |  | 18 Ede Street, Ogbunabali Street                                                      | Port Harcourt  | Rivers  |
| 6658 | RV/0001 | RV/0001/S/8  | Olivet Clinic                                       |  | 18 Ede Street, Ogbunabali Street                                                      | Port Harcourt  | Rivers  |
| 6659 | RV/0001 | RV/0001/S/2  | Olivet Clinic                                       |  | 18 Ede Street, Ogbunabali Street                                                      | Port Harcourt  | Rivers  |
| 6660 | RV/0002 | RV/0002/S/1  | Olunwa Medical Centre                               |  | 4 Amadi Ama Road, Trans-Amadi Layout (Rain-Bow Town)                                  | Port Harcourt  | Rivers  |
| 6661 | RV/0002 | RV/0002/S/5  | Olunwa Medical Centre                               |  | 4 Amadi Ama Road, Trans-Amadi Layout (Rain-Bow Town)                                  | Port Harcourt  | Rivers  |
| 6662 | RV/0002 | RV/0002/S/3  | Olunwa Medical Centre                               |  | 4 Amadi Ama Road, Trans-Amadi Layout (Rain-Bow Town)                                  | Port Harcourt  | Rivers  |
| 6663 | RV/0003 | RV/0003/S/5  | Maryland Health Care                                |  | No.1 Igwuruta Road, Rumuokurushi                                                      | Port Harcourt  | Rivers  |
| 6664 | RV/0004 | RV/0004/S/5  | Springs Hospital                                    |  | 458, Ikwere Road by Kala B/Stop, Mile 5, Diobu                                        | Obio/Akpor     | Rivers  |
| 6665 | RV/0004 | RV/0004/S/2  | Springs Hospital                                    |  | 458, Ikwere Road by Kala B/Stop, Mile 5, Diobu                                        | Obio/Akpor     | Rivers  |
| 6666 | RV/0004 | RV/0004/S/4  | Springs Hospital                                    |  | 458, Ikwere Road by Kala B/Stop, Mile 5, Diobu                                        | Obio/Akpor     | Rivers  |
| 6667 | RV/0004 | RV/0004/S/1  | Springs Hospital                                    |  | 458, Ikwere Road by Kala B/Stop, Mile 5, Diobu                                        | Obio/Akpor     | Rivers  |
| 6668 | RV/0004 | RV/0004/S/3  | Springs Hospital                                    |  | 458, Ikwere Road by Kala B/Stop, Mile 5, Diobu                                        | Obio/Akpor     | Rivers  |
| 6669 | RV/0004 | RV/0004/S/7  | Springs Hospital                                    |  | 458, Ikwere Road by Kala B/Stop, Mile 5, Diobu                                        | Obio/Akpor     | Rivers  |
| 6670 | RV/0004 | RV/0004/S/6  | Springs Hospital                                    |  | 458, Ikwere Road by Kala B/Stop, Mile 5, Diobu                                        | Obio/Akpor     | Rivers  |

|      |         |              |                              |  |                                                                                                     |               |        |
|------|---------|--------------|------------------------------|--|-----------------------------------------------------------------------------------------------------|---------------|--------|
| 6671 | RV/0005 | RV/0005/S/7  | Sophia Clinic                |  | 27 Old Aba Road,<br>Rumuogba, Port Harcourt                                                         | Obio/Akpor    | Rivers |
| 6672 | RV/0005 | RV/0005/S/3  | Sophia Clinic                |  | 27 Old Aba Road,<br>Rumuogba, Port Harcourt                                                         | Obio/Akpor    | Rivers |
| 6673 | RV/0005 | RV/0005/S/1  | Sophia Clinic                |  | 27 Old Aba Road,<br>Rumuogba, Port Harcourt                                                         | Obio/Akpor    | Rivers |
| 6674 | RV/0005 | RV/0005/S/6  | Sophia Clinic                |  | 27 Old Aba Road,<br>Rumuogba, Port Harcourt                                                         | Obio/Akpor    | Rivers |
| 6675 | RV/0005 | RV/0005/S/5  | Sophia Clinic                |  | 27 Old Aba Road,<br>Rumuogba, Port Harcourt                                                         | Obio/Akpor    | Rivers |
| 6676 | RV/0005 | RV/0005/S/2  | Sophia Clinic                |  | 27 Old Aba Road,<br>Rumuogba, Port Harcourt                                                         | Obio/Akpor    | Rivers |
| 6677 | RV/0005 | RV/0005/S/10 | Sophia Clinic                |  | 27 Old Aba Road,<br>Rumuogba, Port Harcourt                                                         | Obio/Akpor    | Rivers |
| 6678 | RV/0006 | RV/0006/S/5  | Ropheka Specialist<br>Clinic |  | 39, Elemenwo Street,<br>Rumueme, P/Harcourt                                                         | Port Harcourt | Rivers |
| 6679 | RV/0006 | RV/0006/S/4  | Ropheka Specialist<br>Clinic |  | 39, Elemenwo Street,<br>Rumueme, P/Harcourt                                                         | Port Harcourt | Rivers |
| 6680 | RV/0006 | RV/0006/S/1  | Ropheka Specialist<br>Clinic |  | 39, Elemenwo Street,<br>Rumueme, P/Harcourt                                                         | Port Harcourt | Rivers |
| 6681 | RV/0006 | RV/0006/S/3  | Ropheka Specialist<br>Clinic |  | 39, Elemenwo Street,<br>Rumueme, P/Harcourt                                                         | Port Harcourt | Rivers |
| 6682 | RV/0007 | RV/0007/S/3  | Anchor Hospital              |  | km 15 P/H - Aba Expressway                                                                          | Obio/Akpor    | Rivers |
| 6683 | RV/0007 | RV/0007/S/7  | Anchor Hospital              |  | km 15 P/H - Aba Expressway                                                                          | Obio/Akpor    | Rivers |
| 6684 | RV/0007 | RV/0007/S/2  | Anchor Hospital              |  | km 15 P/H - Aba Expressway                                                                          | Obio/Akpor    | Rivers |
| 6685 | RV/0007 | RV/0007/S/4  | Anchor Hospital              |  | km 15 P/H - Aba Expressway                                                                          | Obio/Akpor    | Rivers |
| 6686 | RV/0007 | RV/0007/S/5  | Anchor Hospital              |  | km 15 P/H - Aba Expressway                                                                          | Obio/Akpor    | Rivers |
| 6687 | RV/0007 | RV/0007/S/1  | Anchor Hospital              |  | km 15 P/H - Aba Expressway                                                                          | Obio/Akpor    | Rivers |
| 6688 | RV/0008 | RV/0008/S/6  | Princess Medical<br>Centre   |  | No.7 National Supply Road,<br>Canco/Bewac Junction,<br>Trans-Amadi Industrial<br>Layout, P/Harcourt | Obio/Akpor    | Rivers |
| 6689 | RV/0008 | RV/0008/S/4  | Princess Medical<br>Centre   |  | No.7 National Supply Road,<br>Canco/Bewac Junction,<br>Trans-Amadi Industrial<br>Layout, P/Harcourt | Obio/Akpor    | Rivers |
| 6690 | RV/0008 | RV/0008/S/5  | Princess Medical<br>Centre   |  | No.7 National Supply Road,<br>Canco/Bewac Junction,<br>Trans-Amadi Industrial<br>Layout, P/Harcourt | Obio/Akpor    | Rivers |
| 6691 | RV/0008 | RV/0008/S/1  | Princess Medical<br>Centre   |  | No.7 National Supply Road,<br>Canco/Bewac Junction,<br>Trans-Amadi Industrial<br>Layout, P/Harcourt | Obio/Akpor    | Rivers |
| 6692 | RV/0008 | RV/0008/S/3  | Princess Medical<br>Centre   |  | No.7 National Supply Road,<br>Canco/Bewac Junction,<br>Trans-Amadi Industrial<br>Layout, P/Harcourt | Obio/Akpor    | Rivers |
| 6693 | RV/0008 | RV/0008/S/2  | Princess Medical<br>Centre   |  | No.7 National Supply Road,<br>Canco/Bewac Junction,<br>Trans-Amadi Industrial<br>Layout, P/Harcourt | Obio/Akpor    | Rivers |
| 6694 | RV/0009 | RV/0009/S/5  | St. Jude                     |  | 40 Elemenwo Road (Old<br>Refinery Road) Oil Mill<br>Junction, Rumukwurushi, PH                      | Port Harcourt | Rivers |
| 6695 | RV/0009 | RV/0009/S/1  | St. Jude                     |  | 40 Elemenwo Road (Old<br>Refinery Road) Oil Mill<br>Junction, Rumukwurushi, PH                      | Port Harcourt | Rivers |
| 6696 | RV/0009 | RV/0009/S/3  | St. Jude                     |  | 40 Elemenwo Road (Old<br>Refinery Road) Oil Mill<br>Junction, Rumukwurushi, PH                      | Port Harcourt | Rivers |
| 6697 | RV/0009 | RV/0009/S/7  | St. Jude                     |  | 40 Elemenwo Road (Old<br>Refinery Road) Oil Mill<br>Junction, Rumukwurushi, PH                      | Port Harcourt | Rivers |
| 6698 | RV/0010 | RV/0010/S/11 | New Orllins Clinic           |  | 9 Orazi Road, Rumola                                                                                | Obio/Akpor    | Rivers |
| 6699 | RV/0010 | RV/0010/S/6  | New Orllins Clinic           |  | 9 Orazi Road, Rumola                                                                                | Obio/Akpor    | Rivers |
| 6700 | RV/0010 | RV/0010/S/2  | New Orllins Clinic           |  | 9 Orazi Road, Rumola                                                                                | Obio/Akpor    | Rivers |
| 6701 | RV/0010 | RV/0010/S/1  | New Orllins Clinic           |  | 9 Orazi Road, Rumola                                                                                | Obio/Akpor    | Rivers |
| 6702 | RV/0010 | RV/0010/S/3  | New Orllins Clinic           |  | 9 Orazi Road, Rumola                                                                                | Obio/Akpor    | Rivers |
| 6703 | RV/0010 | RV/0010/S/5  | New Orllins Clinic           |  | 9 Orazi Road, Rumola                                                                                | Obio/Akpor    | Rivers |
| 6704 | RV/0011 | RV/0011/S/1  | Harley Clinic                |  | 21B Akaninwor Road,<br>Oroazi, Port Harcourt                                                        | Obio/Akpor    | Rivers |
| 6705 | RV/0011 | RV/0011/S/15 | Harley Clinic                |  | 21B Akaninwor Road,<br>Oroazi, Port Harcourt                                                        | Obio/Akpor    | Rivers |

|      |         |              |                           |        |                                                                             |               |        |
|------|---------|--------------|---------------------------|--------|-----------------------------------------------------------------------------|---------------|--------|
| 6706 | RV/0013 | RV/0013/S/5  | Family Medical Centre     |        | 39 Elelewon Road, Rumuokwurushi                                             | Obio/Akpor    | Rivers |
| 6707 | RV/0013 | RV/0013/S/1  | Family Medical Centre     |        | 39 Elelewon Road, Rumuokwurushi                                             | Obio/Akpor    | Rivers |
| 6708 | RV/0013 | RV/0013/S/3  | Family Medical Centre     |        | 39 Elelewon Road, Rumuokwurushi                                             | Obio/Akpor    | Rivers |
| 6709 | RV/0015 | RV/0015/S/5  | Eddy Medical Centre       |        | 4, Ndoki Lane, Behind 53 Market Road, Rumuomasi, P/H                        | Obio/Akpor    | Rivers |
| 6710 | RV/0015 | RV/0015/S/3  | Eddy Medical Centre       |        | 4, Ndoki Lane, Behind 53 Market Road, Rumuomasi, P/H                        | Obio/Akpor    | Rivers |
| 6711 | RV/0015 | RV/0015/S/1  | Eddy Medical Centre       |        | 4, Ndoki Lane, Behind 53 Market Road, Rumuomasi, P/H                        | Obio/Akpor    | Rivers |
| 6712 | RV/0015 | RV/0015/S/2  | Eddy Medical Centre       |        | 4, Ndoki Lane, Behind 53 Market Road, Rumuomasi, P/H                        | Obio/Akpor    | Rivers |
| 6713 | RV/0016 | RV/0016/S/5  | Queens Clinic             |        | 38 Rumuolumini Rd Wimpy Junction                                            | Obio/Akpor    | Rivers |
| 6714 | RV/0016 | RV/0016/S/4  | Queens Clinic             |        | 38 Rumuolumini Rd Wimpy Junction                                            | Obio/Akpor    | Rivers |
| 6715 | RV/0016 | RV/0016/S/2  | Queens Clinic             |        | 38 Rumuolumini Rd Wimpy Junction                                            | Obio/Akpor    | Rivers |
| 6716 | RV/0016 | RV/0016/S/1  | Queens Clinic             |        | 38 Rumuolumini Rd Wimpy Junction                                            | Obio/Akpor    | Rivers |
| 6717 | RV/0016 | RV/0016/S/3  | Queens Clinic             |        | 38 Rumuolumini Rd Wimpy Junction                                            | Obio/Akpor    | Rivers |
| 6718 | RV/0016 | RV/0016/S/6  | Queens Clinic             |        | 38 Rumuolumini Rd Wimpy Junction                                            | Obio/Akpor    | Rivers |
| 6719 | RV/0019 | RV/0019/S/3  | Siya Medical Centre       |        | 112, Old Aba Road, Rumuobiakani, Port Harcourt                              | Obio/Akpor    | Rivers |
| 6720 | RV/0019 | RV/0019/S/1  | Siya Medical Centre       |        | 112, Old Aba Road, Rumuobiakani, Port Harcourt                              | Obio/Akpor    | Rivers |
| 6721 | RV/0019 | RV/0019/S/10 | Siya Medical Centre       |        | 112, Old Aba Road, Rumuobiakani, Port Harcourt                              | Obio/Akpor    | Rivers |
| 6722 | RV/0019 | RV/0019/S/5  | Siya Medical Centre       |        | 112, Old Aba Road, Rumuobiakani, Port Harcourt                              | Obio/Akpor    | Rivers |
| 6723 | RV/0024 | RV/0024/S/1  | Ebony Hospital Ltd        |        | 9, Orazi Road, Rumulia                                                      | Obio/Akpor    | Rivers |
| 6724 | RV/0024 | RV/0024/S/3  | Ebony Hospital Ltd        |        | 9, Orazi Road, Rumulia                                                      | Obio/Akpor    | Rivers |
| 6725 | RV/0024 | RV/0024/S/4  | Ebony Hospital Ltd        |        | 9, Orazi Road, Rumulia                                                      | Obio/Akpor    | Rivers |
| 6726 | RV/0024 | RV/0024/S/5  | Ebony Hospital Ltd        |        | 9, Orazi Road, Rumulia                                                      | Obio/Akpor    | Rivers |
| 6727 | RV/0024 | RV/0024/S/7  | Ebony Hospital Ltd        |        | 9, Orazi Road, Rumulia                                                      | Obio/Akpor    | Rivers |
| 6728 | RV/0024 | RV/0024/S/10 | Ebony Hospital Ltd        |        | 9, Orazi Road, Rumulia                                                      | Obio/Akpor    | Rivers |
| 6729 | RV/0027 | RV/0027/S/8  | Lancet Dental Clinic      | Dental | 208B, Aba Express                                                           | Obio/Akpor    | Rivers |
| 6730 | RV/0037 | RV/0037/S/3  | Fanny Royal Hospital      |        | 4, Bimkol Crescent G.R.A. Phase III                                         | Obio/Akpor    | Rivers |
| 6731 | RV/0037 | RV/0037/S/5  | Fanny Royal Hospital      |        | 4, Bimkol Crescent G.R.A. Phase III                                         | Obio/Akpor    | Rivers |
| 6732 | RV/0037 | RV/0037/S/7  | Fanny Royal Hospital      |        | 4, Bimkol Crescent G.R.A. Phase III                                         | Obio/Akpor    | Rivers |
| 6733 | RV/0038 | RV/0038/S/7  | Aggrey Clinic Ltd.        |        | 107 Aggrey Road Rivers                                                      | Port Harcourt | Rivers |
| 6734 | RV/0038 | RV/0038/S/5  | Aggrey Clinic Ltd.        |        | 107 Aggrey Road Rivers                                                      | Port Harcourt | Rivers |
| 6735 | RV/0038 | RV/0038/S/6  | Aggrey Clinic Ltd.        |        | 107 Aggrey Road Rivers                                                      | Port Harcourt | Rivers |
| 6736 | RV/0038 | RV/0038/S/8  | Aggrey Clinic Ltd.        |        | 107 Aggrey Road Rivers                                                      | Port Harcourt | Rivers |
| 6737 | RV/0038 | RV/0038/S/1  | Aggrey Clinic Ltd.        |        | 107 Aggrey Road Rivers                                                      | Port Harcourt | Rivers |
| 6738 | RV/0038 | RV/0038/S/3  | Aggrey Clinic Ltd.        |        | 107 Aggrey Road Rivers                                                      | Port Harcourt | Rivers |
| 6739 | RV/0038 | RV/0038/S/2  | Aggrey Clinic Ltd.        |        | 107 Aggrey Road Rivers                                                      | Port Harcourt | Rivers |
| 6740 | RV/0039 | RV/0039/S/1  | Odessa Med. Services Ltd. |        | 5 Royal Paragon Hotel Avenue, Iwofe Road, Rivers                            | Port Harcourt | Rivers |
| 6741 | RV/0039 | RV/0039/S/3  | Odessa Med. Services Ltd. |        | 5 Royal Paragon Hotel Avenue, Iwofe Road, Rivers                            | Port Harcourt | Rivers |
| 6742 | RV/0039 | RV/0039/S/5  | Odessa Med. Services Ltd. |        | 5 Royal Paragon Hotel Avenue, Iwofe Road, Rivers                            | Port Harcourt | Rivers |
| 6743 | RV/0040 | RV/0040/S/12 | Meridian Hospitals        |        | 21, Ibokwe Street, D.Line                                                   | Port Harcourt | Rivers |
| 6744 | RV/0040 | RV/0040/S/3  | Meridian Hospitals        |        | 21, Ibokwe Street, D.Line                                                   | Port Harcourt | Rivers |
| 6745 | RV/0040 | RV/0040/S/10 | Meridian Hospitals        |        | 21, Ibokwe Street, D.Line                                                   | Port Harcourt | Rivers |
| 6746 | RV/0040 | RV/0040/S/6  | Meridian Hospitals        |        | 21, Ibokwe Street, D.Line                                                   | Port Harcourt | Rivers |
| 6747 | RV/0040 | RV/0040/S/2  | Meridian Hospitals        |        | 21, Ibokwe Street, D.Line                                                   | Port Harcourt | Rivers |
| 6748 | RV/0040 | RV/0040/S/7  | Meridian Hospitals        |        | 21, Ibokwe Street, D.Line                                                   | Port Harcourt | Rivers |
| 6749 | RV/0040 | RV/0040/S/1  | Meridian Hospitals        |        | 21, Ibokwe Street, D.Line                                                   | Port Harcourt | Rivers |
| 6750 | RV/0040 | RV/0040/S/5  | Meridian Hospitals        |        | 21, Ibokwe Street, D.Line                                                   | Port Harcourt | Rivers |
| 6751 | RV/0042 | RV/0042/S/5  | Ponyx Clinic              |        | 2, Chuku Olunda Street, Off Anon Lodge, by Waterline Junction, Rumukalagbor | Obio/Akpor    | Rivers |
| 6752 | RV/0042 | RV/0042/S/7  | Ponyx Clinic              |        | 2, Chuku Olunda Street, Off Anon Lodge, by Waterline Junction, Rumukalagbor | Obio/Akpor    | Rivers |



|      |         |              |                                               |  |                                                                             |               |        |
|------|---------|--------------|-----------------------------------------------|--|-----------------------------------------------------------------------------|---------------|--------|
| 6753 | RV/0042 | RV/0042/S/8  | Ponyx Clinic                                  |  | 2, Chuku Olunda Street, Off Anon Lodge, by Waterline Junction, Rumukalagbor | Obio/Akpor    | Rivers |
| 6754 | RV/0043 | RV/0043/S/3  | Hossana Clinic/ Maternity                     |  | 33, Abel Jumbo St. Mile 2, P/Harcourt                                       | Port Harcourt | Rivers |
| 6755 | RV/0043 | RV/0043/S/2  | Hossana Clinic/ Maternity                     |  | 33, Abel Jumbo St. Mile 2, P/Harcourt                                       | Port Harcourt | Rivers |
| 6756 | RV/0043 | RV/0043/S/1  | Hossana Clinic/ Maternity                     |  | 33, Abel Jumbo St. Mile 2, P/Harcourt                                       | Port Harcourt | Rivers |
| 6757 | RV/0043 | RV/0043/S/6  | Hossana Clinic/ Maternity                     |  | 33, Abel Jumbo St. Mile 2, P/Harcourt                                       | Port Harcourt | Rivers |
| 6758 | RV/0043 | RV/0043/S/5  | Hossana Clinic/ Maternity                     |  | 33, Abel Jumbo St. Mile 2, P/Harcourt                                       | Port Harcourt | Rivers |
| 6759 | RV/0044 | RV/0044/S/7  | Destiny Hospital & Maternity                  |  | 38, Ihediohama Diobu Mile 2, P/Harcourt                                     | Port Harcourt | Rivers |
| 6760 | RV/0044 | RV/0044/S/5  | Destiny Hospital & Maternity                  |  | 38, Ihediohama Diobu Mile 2, P/Harcourt                                     | Port Harcourt | Rivers |
| 6761 | RV/0044 | RV/0044/S/1  | Destiny Hospital & Maternity                  |  | 38, Ihediohama Diobu Mile 2, P/Harcourt                                     | Port Harcourt | Rivers |
| 6762 | RV/0044 | RV/0044/S/3  | Destiny Hospital & Maternity                  |  | 38, Ihediohama Diobu Mile 2, P/Harcourt                                     | Port Harcourt | Rivers |
| 6763 | RV/0044 | RV/0044/S/6  | Destiny Hospital & Maternity                  |  | 38, Ihediohama Diobu Mile 2, P/Harcourt                                     | Port Harcourt | Rivers |
| 6764 | RV/0044 | RV/0044/S/2  | Destiny Hospital & Maternity                  |  | 38, Ihediohama Diobu Mile 2, P/Harcourt                                     | Port Harcourt | Rivers |
| 6765 | RV/0045 | RV/0045/S/3  | Calvary Clinic                                |  | 7a, Haardy U. Street, Orazi, P/Harcourt                                     | Port Harcourt | Rivers |
| 6766 | RV/0045 | RV/0045/S/6  | Calvary Clinic                                |  | 7a, Haardy U. Street, Orazi, P/Harcourt                                     | Port Harcourt | Rivers |
| 6767 | RV/0045 | RV/0045/S/5  | Calvary Clinic                                |  | 7a, Haardy U. Street, Orazi, P/Harcourt                                     | Port Harcourt | Rivers |
| 6768 | RV/0045 | RV/0045/S/4  | Calvary Clinic                                |  | 7a, Haardy U. Street, Orazi, P/Harcourt                                     | Port Harcourt | Rivers |
| 6769 | RV/0045 | RV/0045/S/1  | Calvary Clinic                                |  | 7a, Haardy U. Street, Orazi, P/Harcourt                                     | Port Harcourt | Rivers |
| 6770 | RV/0047 | RV/0047/S/7  | University Of Port Harcourt Teaching Hospital |  | Port Harcourt                                                               | Port Harcourt | Rivers |
| 6771 | RV/0047 | RV/0047/S/5  | University Of Port Harcourt Teaching Hospital |  | Port Harcourt                                                               | Port Harcourt | Rivers |
| 6772 | RV/0047 | RV/0047/S/3  | University Of Port Harcourt Teaching Hospital |  | Port Harcourt                                                               | Port Harcourt | Rivers |
| 6773 | RV/0047 | RV/0047/S/4  | University Of Port Harcourt Teaching Hospital |  | Port Harcourt                                                               | Port Harcourt | Rivers |
| 6774 | RV/0047 | RV/0047/S/1  | University Of Port Harcourt Teaching Hospital |  | Port Harcourt                                                               | Port Harcourt | Rivers |
| 6775 | RV/0048 | RV/0048/S/3  | Braithwaite Memorial Hospital                 |  | Port Harcourt                                                               | Port Harcourt | Rivers |
| 6776 | RV/0048 | RV/0048/S/6  | Braithwaite Memorial Hospital                 |  | Port Harcourt                                                               | Port Harcourt | Rivers |
| 6777 | RV/0048 | RV/0048/S/5  | Braithwaite Memorial Hospital                 |  | Port Harcourt                                                               | Port Harcourt | Rivers |
| 6778 | RV/0048 | RV/0048/S/11 | Braithwaite Memorial Hospital                 |  | Port Harcourt                                                               | Port Harcourt | Rivers |
| 6779 | RV/0048 | RV/0048/S/4  | Braithwaite Memorial Hospital                 |  | Port Harcourt                                                               | Port Harcourt | Rivers |
| 6780 | RV/0048 | RV/0048/S/7  | Braithwaite Memorial Hospital                 |  | Port Harcourt                                                               | Port Harcourt | Rivers |
| 6781 | RV/0049 | RV/0049/S/5  | Ashford And Patrice Clinic Ltd.               |  | 38 Manila Pepple D. Line, Ph, Rivers State.                                 | Port Harcourt | Rivers |
| 6782 | RV/0049 | RV/0049/S/4  | Ashford And Patrice Clinic Ltd.               |  | 38 Manila Pepple D. Line, Ph, Rivers State.                                 | Port Harcourt | Rivers |
| 6783 | RV/0049 | RV/0049/S/2  | Ashford And Patrice Clinic Ltd.               |  | 38 Manila Pepple D. Line, Ph, Rivers State.                                 | Port Harcourt | Rivers |
| 6784 | RV/0049 | RV/0049/S/6  | Ashford And Patrice Clinic Ltd.               |  | 38 Manila Pepple D. Line, Ph, Rivers State.                                 | Port Harcourt | Rivers |
| 6785 | RV/0049 | RV/0049/S/10 | Ashford And Patrice Clinic Ltd.               |  | 38 Manila Pepple D. Line, Ph, Rivers State.                                 | Port Harcourt | Rivers |
| 6786 | RV/0049 | RV/0049/S/3  | Ashford And Patrice Clinic Ltd.               |  | 38 Manila Pepple D. Line, Ph, Rivers State.                                 | Port Harcourt | Rivers |
| 6787 | RV/0049 | RV/0049/S/1  | Ashford And Patrice Clinic Ltd.               |  | 38 Manila Pepple D. Line, Ph, Rivers State.                                 | Port Harcourt | Rivers |
| 6788 | RV/0050 | RV/0050/S/3  | Providence Clinic & Maternity                 |  | 11 Railway Close, D-Line Ph.                                                | Port Harcourt | Rivers |
| 6789 | RV/0050 | RV/0050/S/6  | Providence Clinic & Maternity                 |  | 11 Railway Close, D-Line Ph.                                                | Port Harcourt | Rivers |
| 6790 | RV/0050 | RV/0050/S/7  | Providence Clinic & Maternity                 |  | 11 Railway Close, D-Line Ph.                                                | Port Harcourt | Rivers |
| 6791 | RV/0050 | RV/0050/S/5  | Providence Clinic & Maternity                 |  | 11 Railway Close, D-Line Ph.                                                | Port Harcourt | Rivers |
| 6792 | RV/0050 | RV/0050/S/1  | Providence Clinic & Maternity                 |  | 11 Railway Close, D-Line Ph.                                                | Port Harcourt | Rivers |
| 6793 | RV/0050 | RV/0050/S/2  | Providence Clinic & Maternity                 |  | 11 Railway Close, D-Line Ph.                                                | Port Harcourt | Rivers |

|      |         |              |                                 |                                                                               |                                                        |               |        |
|------|---------|--------------|---------------------------------|-------------------------------------------------------------------------------|--------------------------------------------------------|---------------|--------|
| 6794 | RV/0051 | RV/0051/S/1  | Vita Medical Centre             |                                                                               | 27, Nsukka Street, Mile1 Diobu,                        | Port Harcourt | Rivers |
| 6795 | RV/0051 | RV/0051/S/5  | Vita Medical Centre             |                                                                               | 27, Nsukka Street, Mile1 Diobu,                        | Port Harcourt | Rivers |
| 6796 | RV/0051 | RV/0051/S/3  | Vita Medical Centre             |                                                                               | 27, Nsukka Street, Mile1 Diobu,                        | Port Harcourt | Rivers |
| 6797 | RV/0051 | RV/0051/S/2  | Vita Medical Centre             |                                                                               | 27, Nsukka Street, Mile1 Diobu,                        | Port Harcourt | Rivers |
| 6798 | RV/0052 | RV/0052/S/3  | Seaside Specialist Surgery      |                                                                               | 89, VictorialStreet                                    | Port Harcourt | Rivers |
| 6799 | RV/0052 | RV/0052/S/1  | Seaside Specialist Surgery      |                                                                               | 89, VictorialStreet                                    | Port Harcourt | Rivers |
| 6800 | RV/0052 | RV/0052/S/7  | Seaside Specialist Surgery      |                                                                               | 89, VictorialStreet                                    | Port Harcourt | Rivers |
| 6801 | RV/0054 | RV/0054/S/6  | Nobsams Clinics                 |                                                                               | 44 Trans Amadi Industrial Layout, Oginigba             | Port Harcourt | Rivers |
| 6802 | RV/0054 | RV/0054/S/2  | Nobsams Clinics                 |                                                                               | 44 Trans Amadi Industrial Layout, Oginigba             | Port Harcourt | Rivers |
| 6803 | RV/0054 | RV/0054/S/4  | Nobsams Clinics                 |                                                                               | 44 Trans Amadi Industrial Layout, Oginigba             | Port Harcourt | Rivers |
| 6804 | RV/0054 | RV/0054/S/5  | Nobsams Clinics                 |                                                                               | 44 Trans Amadi Industrial Layout, Oginigba             | Port Harcourt | Rivers |
| 6805 | RV/0054 | RV/0054/S/3  | Nobsams Clinics                 |                                                                               | 44 Trans Amadi Industrial Layout, Oginigba             | Port Harcourt | Rivers |
| 6806 | RV/0054 | RV/0054/S/1  | Nobsams Clinics                 |                                                                               | 44 Trans Amadi Industrial Layout, Oginigba             | Port Harcourt | Rivers |
| 6807 | RV/0062 | RV/0062/S/1  | Meridian Hospitals              | Surgery, O&G, Medicine, Paediatrics, Orthopaedics, Radiology, ENT, Laboratory | 128, Ikwere Road, P/Harcourt.                          | Port Harcourt | Rivers |
| 6808 | RV/0062 | RV/0062/S/3  | Meridian Hospitals              | Surgery, O&G, Medicine, Paediatrics, Orthopaedics, Radiology, ENT, Laboratory | 128, Ikwere Road, P/Harcourt.                          | Port Harcourt | Rivers |
| 6809 | RV/0062 | RV/0062/S/2  | Meridian Hospitals              | Surgery, O&G, Medicine, Paediatrics, Orthopaedics, Radiology, ENT, Laboratory | 128, Ikwere Road, P/Harcourt.                          | Port Harcourt | Rivers |
| 6810 | RV/0062 | RV/0062/S/10 | Meridian Hospitals              | Surgery, O&G, Medicine, Paediatrics, Orthopaedics, Radiology, ENT, Laboratory | 128, Ikwere Road, P/Harcourt.                          | Port Harcourt | Rivers |
| 6811 | RV/0062 | RV/0062/S/12 | Meridian Hospitals              | Surgery, O&G, Medicine, Paediatrics, Orthopaedics, Radiology, ENT, Laboratory | 128, Ikwere Road, P/Harcourt.                          | Port Harcourt | Rivers |
| 6812 | RV/0062 | RV/0062/S/6  | Meridian Hospitals              | Surgery, O&G, Medicine, Paediatrics, Orthopaedics, Radiology, ENT, Laboratory | 128, Ikwere Road, P/Harcourt.                          | Port Harcourt | Rivers |
| 6813 | RV/0062 | RV/0062/S/7  | Meridian Hospitals              | Surgery, O&G, Medicine, Paediatrics, Orthopaedics, Radiology, ENT, Laboratory | 128, Ikwere Road, P/Harcourt.                          | Port Harcourt | Rivers |
| 6814 | RV/0062 | RV/0062/S/5  | Meridian Hospitals              | Surgery, O&G, Medicine, Paediatrics, Orthopaedics, Radiology, ENT, Laboratory | 128, Ikwere Road, P/Harcourt.                          | Port Harcourt | Rivers |
| 6815 | RV/0065 | RV/0065/S/1  | Calvary Eye Care                | Optometric                                                                    | 421, Trans-Amadi Road, Opp. Pasbod Breweries Oginigba  | Port Harcourt | Rivers |
| 6816 | RV/0066 | RV/0066/S/15 | Korene Eye Clinic Nig. Ltd      | Ophthalmology                                                                 | 28, Old Aba Road                                       | Obio/Akpor    | Rivers |
| 6817 | RV/0069 | RV/0069/S/4  | Valorz Pharmacy                 | Pharmacy                                                                      | 76, Old Aba Rd. Rumuomasi.                             | Obio/Akpor    | Rivers |
| 6818 | RV/0079 | RV/0079/S/5  | Christ The King Hospital        |                                                                               | 145 Old Aba/P.H Road, Mbano Camp, Oyigbo, Rivers State | Port Harcourt | Rivers |
| 6819 | RV/0080 | RV/0080/S/5  | St. Mary's Hospital & Maternity |                                                                               | 5, Estate Road, Woji                                   | Obio/Akpor    | Rivers |
| 6820 | RV/0080 | RV/0080/S/6  | St. Mary's Hospital & Maternity |                                                                               | 5, Estate Road, Woji                                   | Obio/Akpor    | Rivers |
| 6821 | RV/0080 | RV/0080/S/2  | St. Mary's Hospital & Maternity |                                                                               | 5, Estate Road, Woji                                   | Obio/Akpor    | Rivers |

|      |         |              |                                   |  |                                       |               |        |
|------|---------|--------------|-----------------------------------|--|---------------------------------------|---------------|--------|
| 6822 | RV/0080 | RV/0080/S/10 | St. Mary's Hospital & Maternity   |  | 5, Estate Road, Woji                  | Obio/Akpor    | Rivers |
| 6823 | RV/0080 | RV/0080/S/1  | St. Mary's Hospital & Maternity   |  | 5, Estate Road, Woji                  | Obio/Akpor    | Rivers |
| 6824 | RV/0080 | RV/0080/S/3  | St. Mary's Hospital & Maternity   |  | 5, Estate Road, Woji                  | Obio/Akpor    | Rivers |
| 6825 | RV/0081 | RV/0081/S/5  | Teme Hospital Ltd                 |  | 10, New Hospital Lane                 | Port Harcourt | Rivers |
| 6826 | RV/0081 | RV/0081/S/7  | Teme Hospital Ltd                 |  | 10, New Hospital Lane                 | Port Harcourt | Rivers |
| 6827 | RV/0081 | RV/0081/S/10 | Teme Hospital Ltd                 |  | 10, New Hospital Lane                 | Port Harcourt | Rivers |
| 6828 | RV/0081 | RV/0081/S/6  | Teme Hospital Ltd                 |  | 10, New Hospital Lane                 | Port Harcourt | Rivers |
| 6829 | RV/0081 | RV/0081/S/2  | Teme Hospital Ltd                 |  | 10, New Hospital Lane                 | Port Harcourt | Rivers |
| 6830 | RV/0081 | RV/0081/S/1  | Teme Hospital Ltd                 |  | 10, New Hospital Lane                 | Port Harcourt | Rivers |
| 6831 | RV/0081 | RV/0081/S/3  | Teme Hospital Ltd                 |  | 10, New Hospital Lane                 | Port Harcourt | Rivers |
| 6832 | RV/0082 | RV/0082/S/1  | Triumph Hospital                  |  | 2, Estate Road Off Aba Road, Rumuogba | Obio/Akpor    | Rivers |
| 6833 | RV/0082 | RV/0082/S/3  | Triumph Hospital                  |  | 2, Estate Road Off Aba Road, Rumuogba | Obio/Akpor    | Rivers |
| 6834 | RV/0082 | RV/0082/S/5  | Triumph Hospital                  |  | 2, Estate Road Off Aba Road, Rumuogba | Obio/Akpor    | Rivers |
| 6835 | RV/0084 | RV/0084/S/3  | Kez Clinic                        |  | 16, Chief Wopara Street, Rumuomasi    | Obio/Akpor    | Rivers |
| 6836 | RV/0084 | RV/0084/S/2  | Kez Clinic                        |  | 16, Chief Wopara Street, Rumuomasi    | Obio/Akpor    | Rivers |
| 6837 | RV/0084 | RV/0084/S/10 | Kez Clinic                        |  | 16, Chief Wopara Street, Rumuomasi    | Obio/Akpor    | Rivers |
| 6838 | RV/0084 | RV/0084/S/1  | Kez Clinic                        |  | 16, Chief Wopara Street, Rumuomasi    | Obio/Akpor    | Rivers |
| 6839 | RV/0084 | RV/0084/S/5  | Kez Clinic                        |  | 16, Chief Wopara Street, Rumuomasi    | Obio/Akpor    | Rivers |
| 6840 | RV/0085 | RV/0085/S/5  | Empire Specialist Clinic & Trauma |  | 19, Echinwo, Elekahia                 | Obio/Akpor    | Rivers |
| 6841 | RV/0085 | RV/0085/S/10 | Empire Specialist Clinic & Trauma |  | 19, Echinwo, Elekahia                 | Obio/Akpor    | Rivers |
| 6842 | RV/0085 | RV/0085/S/2  | Empire Specialist Clinic & Trauma |  | 19, Echinwo, Elekahia                 | Obio/Akpor    | Rivers |
| 6843 | RV/0085 | RV/0085/S/3  | Empire Specialist Clinic & Trauma |  | 19, Echinwo, Elekahia                 | Obio/Akpor    | Rivers |
| 6844 | RV/0085 | RV/0085/S/1  | Empire Specialist Clinic & Trauma |  | 19, Echinwo, Elekahia                 | Obio/Akpor    | Rivers |
| 6845 | RV/0086 | RV/0086/S/5  | Alma Hospital                     |  | 15, Wani Street, Oroworukwo           | Port Harcourt | Rivers |
| 6846 | RV/0088 | RV/0088/S/1  | First Rivers Hospital             |  | 250a Ph/Aba Expressway                | Obio/Akpor    | Rivers |
| 6847 | RV/0088 | RV/0088/S/3  | First Rivers Hospital             |  | 250a Ph/Aba Expressway                | Obio/Akpor    | Rivers |
| 6848 | RV/0088 | RV/0088/S/2  | First Rivers Hospital             |  | 250a Ph/Aba Expressway                | Obio/Akpor    | Rivers |
| 6849 | RV/0088 | RV/0088/S/6  | First Rivers Hospital             |  | 250a Ph/Aba Expressway                | Obio/Akpor    | Rivers |
| 6850 | RV/0088 | RV/0088/S/10 | First Rivers Hospital             |  | 250a Ph/Aba Expressway                | Obio/Akpor    | Rivers |
| 6851 | RV/0089 | RV/0089/S/10 | Sonabel Medical Centre            |  | 14 Owabie Road, Mile 4 Rumueme        | Port Harcourt | Rivers |
| 6852 | RV/0089 | RV/0089/S/6  | Sonabel Medical Centre            |  | 14 Owabie Road, Mile 4 Rumueme        | Port Harcourt | Rivers |
| 6853 | RV/0089 | RV/0089/S/3  | Sonabel Medical Centre            |  | 14 Owabie Road, Mile 4 Rumueme        | Port Harcourt | Rivers |
| 6854 | RV/0089 | RV/0089/S/1  | Sonabel Medical Centre            |  | 14 Owabie Road, Mile 4 Rumueme        | Port Harcourt | Rivers |
| 6855 | RV/0089 | RV/0089/S/5  | Sonabel Medical Centre            |  | 14 Owabie Road, Mile 4 Rumueme        | Port Harcourt | Rivers |
| 6856 | RV/0089 | RV/0089/S/4  | Sonabel Medical Centre            |  | 14 Owabie Road, Mile 4 Rumueme        | Port Harcourt | Rivers |
| 6857 | RV/0089 | RV/0089/S/2  | Sonabel Medical Centre            |  | 14 Owabie Road, Mile 4 Rumueme        | Port Harcourt | Rivers |
| 6858 | RV/0089 | RV/0089/S/7  | Sonabel Medical Centre            |  | 14 Owabie Road, Mile 4 Rumueme        | Port Harcourt | Rivers |
| 6859 | RV/0089 | RV/0089/S/15 | Sonabel Medical Centre            |  | 14 Owabie Road, Mile 4 Rumueme        | Port Harcourt | Rivers |
| 6860 | RV/0090 | RV/0090/S/11 | New Mile One Hospital             |  | 15 Emenike Street, Mile 1 Diobu       | Port Harcourt | Rivers |
| 6861 | RV/0090 | RV/0090/S/2  | New Mile One Hospital             |  | 15 Emenike Street, Mile 1 Diobu       | Port Harcourt | Rivers |
| 6862 | RV/0090 | RV/0090/S/5  | New Mile One Hospital             |  | 15 Emenike Street, Mile 1 Diobu       | Port Harcourt | Rivers |
| 6863 | RV/0090 | RV/0090/S/1  | New Mile One Hospital             |  | 15 Emenike Street, Mile 1 Diobu       | Port Harcourt | Rivers |
| 6864 | RV/0090 | RV/0090/S/3  | New Mile One Hospital             |  | 15 Emenike Street, Mile 1 Diobu       | Port Harcourt | Rivers |
| 6865 | RV/0090 | RV/0090/S/15 | New Mile One Hospital             |  | 15 Emenike Street, Mile 1 Diobu       | Port Harcourt | Rivers |
| 6866 | RV/0090 | RV/0090/S/6  | New Mile One Hospital             |  | 15 Emenike Street, Mile 1 Diobu       | Port Harcourt | Rivers |
| 6867 | RV/0090 | RV/0090/S/7  | New Mile One Hospital             |  | 15 Emenike Street, Mile 1 Diobu       | Port Harcourt | Rivers |
| 6868 | RV/0090 | RV/0090/S/4  | New Mile One Hospital             |  | 15 Emenike Street, Mile 1 Diobu       | Port Harcourt | Rivers |
| 6869 | RV/0091 | RV/0091/S/5  | Valentine Hospitals               |  | Plot B2, Opp. 20 Forces Av. Old Gra   | Port Harcourt | Rivers |
| 6870 | RV/0091 | RV/0091/S/4  | Valentine Hospitals               |  | Plot B2, Opp. 20 Forces Av. Old Gra   | Port Harcourt | Rivers |
| 6871 | RV/0092 | RV/0092/S/4  | Rivon Clinic                      |  | Aba/Ph Expressway, Genesis Junction   | Obio/Akpor    | Rivers |
| 6872 | RV/0092 | RV/0092/S/10 | Rivon Clinic                      |  | Aba/Ph Expressway, Genesis Junction   | Obio/Akpor    | Rivers |

|      |         |              |                                  |  |                                                     |               |        |
|------|---------|--------------|----------------------------------|--|-----------------------------------------------------|---------------|--------|
| 6873 | RV/0092 | RV/0092/S/1  | Rivon Clinic                     |  | Aba/Ph Expressway, Genesis Junction                 | Obio/Akpor    | Rivers |
| 6874 | RV/0092 | RV/0092/S/3  | Rivon Clinic                     |  | Aba/Ph Expressway, Genesis Junction                 | Obio/Akpor    | Rivers |
| 6875 | RV/0092 | RV/0092/S/5  | Rivon Clinic                     |  | Aba/Ph Expressway, Genesis Junction                 | Obio/Akpor    | Rivers |
| 6876 | RV/0092 | RV/0092/S/6  | Rivon Clinic                     |  | Aba/Ph Expressway, Genesis Junction                 | Obio/Akpor    | Rivers |
| 6877 | RV/0092 | RV/0092/S/2  | Rivon Clinic                     |  | Aba/Ph Expressway, Genesis Junction                 | Obio/Akpor    | Rivers |
| 6878 | RV/0092 | RV/0092/S/7  | Rivon Clinic                     |  | Aba/Ph Expressway, Genesis Junction                 | Obio/Akpor    | Rivers |
| 6879 | RV/0092 | RV/0092/S/11 | Rivon Clinic                     |  | Aba/Ph Expressway, Genesis Junction                 | Obio/Akpor    | Rivers |
| 6880 | RV/0093 | RV/0093/S/4  | St. Catherines Specialist Clinic |  | 17b Ahiamakara Road, By Nwaya Junction, Trans-Amadi | Port Harcourt | Rivers |
| 6881 | RV/0093 | RV/0093/S/5  | St. Catherines Specialist Clinic |  | 17b Ahiamakara Road, By Nwaya Junction, Trans-Amadi | Port Harcourt | Rivers |
| 6882 | RV/0093 | RV/0093/S/6  | St. Catherines Specialist Clinic |  | 17b Ahiamakara Road, By Nwaya Junction, Trans-Amadi | Port Harcourt | Rivers |
| 6883 | RV/0093 | RV/0093/S/2  | St. Catherines Specialist Clinic |  | 17b Ahiamakara Road, By Nwaya Junction, Trans-Amadi | Port Harcourt | Rivers |
| 6884 | RV/0093 | RV/0093/S/1  | St. Catherines Specialist Clinic |  | 17b Ahiamakara Road, By Nwaya Junction, Trans-Amadi | Port Harcourt | Rivers |
| 6885 | RV/0093 | RV/0093/S/3  | St. Catherines Specialist Clinic |  | 17b Ahiamakara Road, By Nwaya Junction, Trans-Amadi | Port Harcourt | Rivers |
| 6886 | RV/0094 | RV/0094/S/1  | Pristine Med. Consultant         |  | 7 Nwviuke Rd., Off 125 Okporo Rd., Rumuogba         | Obio/Akpor    | Rivers |
| 6887 | RV/0094 | RV/0094/S/2  | Pristine Med. Consultant         |  | 7 Nwviuke Rd., Off 125 Okporo Rd., Rumuogba         | Obio/Akpor    | Rivers |
| 6888 | RV/0094 | RV/0094/S/5  | Pristine Med. Consultant         |  | 7 Nwviuke Rd., Off 125 Okporo Rd., Rumuogba         | Obio/Akpor    | Rivers |
| 6889 | RV/0094 | RV/0094/S/3  | Pristine Med. Consultant         |  | 7 Nwviuke Rd., Off 125 Okporo Rd., Rumuogba         | Obio/Akpor    | Rivers |
| 6890 | RV/0095 | RV/0095/S/5  | Sapiens Clinic                   |  | 2a Mini Ezekwu Street, Off Okporo Rd., Rumuogba     | Obio/Akpor    | Rivers |
| 6891 | RV/0095 | RV/0095/S/6  | Sapiens Clinic                   |  | 2a Mini Ezekwu Street, Off Okporo Rd., Rumuogba     | Obio/Akpor    | Rivers |
| 6892 | RV/0095 | RV/0095/S/1  | Sapiens Clinic                   |  | 2a Mini Ezekwu Street, Off Okporo Rd., Rumuogba     | Obio/Akpor    | Rivers |
| 6893 | RV/0095 | RV/0095/S/2  | Sapiens Clinic                   |  | 2a Mini Ezekwu Street, Off Okporo Rd., Rumuogba     | Obio/Akpor    | Rivers |
| 6894 | RV/0095 | RV/0095/S/3  | Sapiens Clinic                   |  | 2a Mini Ezekwu Street, Off Okporo Rd., Rumuogba     | Obio/Akpor    | Rivers |
| 6895 | RV/0096 | RV/0096/S/2  | St. Patrick Hospital             |  | 3 Ogbunabali Street                                 | Port Harcourt | Rivers |
| 6896 | RV/0096 | RV/0096/S/5  | St. Patrick Hospital             |  | 3 Ogbunabali Street                                 | Port Harcourt | Rivers |
| 6897 | RV/0096 | RV/0096/S/1  | St. Patrick Hospital             |  | 3 Ogbunabali Street                                 | Port Harcourt | Rivers |
| 6898 | RV/0096 | RV/0096/S/6  | St. Patrick Hospital             |  | 3 Ogbunabali Street                                 | Port Harcourt | Rivers |
| 6899 | RV/0096 | RV/0096/S/15 | St. Patrick Hospital             |  | 3 Ogbunabali Street                                 | Port Harcourt | Rivers |
| 6900 | RV/0096 | RV/0096/S/3  | St. Patrick Hospital             |  | 3 Ogbunabali Street                                 | Port Harcourt | Rivers |
| 6901 | RV/0096 | RV/0096/S/11 | St. Patrick Hospital             |  | 3 Ogbunabali Street                                 | Port Harcourt | Rivers |
| 6902 | RV/0096 | RV/0096/S/7  | St. Patrick Hospital             |  | 3 Ogbunabali Street                                 | Port Harcourt | Rivers |
| 6903 | RV/0097 | RV/0097/S/1  | Alphonso Hospital                |  | Amadi Bus Stop, Along Refinery Rd., Elelenwon       | Obio/Akpor    | Rivers |
| 6904 | RV/0097 | RV/0097/S/3  | Alphonso Hospital                |  | Amadi Bus Stop, Along Refinery Rd., Elelenwon       | Obio/Akpor    | Rivers |
| 6905 | RV/0097 | RV/0097/S/5  | Alphonso Hospital                |  | Amadi Bus Stop, Along Refinery Rd., Elelenwon       | Obio/Akpor    | Rivers |
| 6906 | RV/0097 | RV/0097/S/2  | Alphonso Hospital                |  | Amadi Bus Stop, Along Refinery Rd., Elelenwon       | Obio/Akpor    | Rivers |
| 6907 | RV/0097 | RV/0097/S/7  | Alphonso Hospital                |  | Amadi Bus Stop, Along Refinery Rd., Elelenwon       | Obio/Akpor    | Rivers |
| 6908 | RV/0097 | RV/0097/S/6  | Alphonso Hospital                |  | Amadi Bus Stop, Along Refinery Rd., Elelenwon       | Obio/Akpor    | Rivers |
| 6909 | RV/0099 | RV/0099/S/2  | Morning Star Hospital            |  | 19 Isiokpo Street, D/Line                           | Port Harcourt | Rivers |
| 6910 | RV/0099 | RV/0099/S/5  | Morning Star Hospital            |  | 19 Isiokpo Street, D/Line                           | Port Harcourt | Rivers |
| 6911 | RV/0099 | RV/0099/S/6  | Morning Star Hospital            |  | 19 Isiokpo Street, D/Line                           | Port Harcourt | Rivers |
| 6912 | RV/0099 | RV/0099/S/3  | Morning Star Hospital            |  | 19 Isiokpo Street, D/Line                           | Port Harcourt | Rivers |
| 6913 | RV/0099 | RV/0099/S/1  | Morning Star Hospital            |  | 19 Isiokpo Street, D/Line                           | Port Harcourt | Rivers |
| 6914 | RV/0099 | RV/0099/S/4  | Morning Star Hospital            |  | 19 Isiokpo Street, D/Line                           | Port Harcourt | Rivers |
| 6915 | RV/0101 | RV/0101/S/4  | Woji Cottage Hospital            |  | Accon Road, Woji Town, Rivers State                 | Port Harcourt | Rivers |

|      |         |              |                                    |                           |                                                                   |               |        |
|------|---------|--------------|------------------------------------|---------------------------|-------------------------------------------------------------------|---------------|--------|
| 6916 | RV/0101 | RV/0101/S/1  | Woji Cottage Hospital              |                           | Accon Road, Woji Town, Rivers State                               | Port Harcourt | Rivers |
| 6917 | RV/0101 | RV/0101/S/3  | Woji Cottage Hospital              |                           | Accon Road, Woji Town, Rivers State                               | Port Harcourt | Rivers |
| 6918 | RV/0101 | RV/0101/S/6  | Woji Cottage Hospital              |                           | Accon Road, Woji Town, Rivers State                               | Port Harcourt | Rivers |
| 6919 | RV/0101 | RV/0101/S/2  | Woji Cottage Hospital              |                           | Accon Road, Woji Town, Rivers State                               | Port Harcourt | Rivers |
| 6920 | RV/0102 | RV/0102/S/4  | Palmers Hospital & Mat. Home       |                           | 5/7 Agip Road Rumueme                                             | Obio/Akpor    | Rivers |
| 6921 | RV/0102 | RV/0102/S/2  | Palmers Hospital & Mat. Home       |                           | 5/7 Agip Road Rumueme                                             | Obio/Akpor    | Rivers |
| 6922 | RV/0102 | RV/0102/S/7  | Palmers Hospital & Mat. Home       |                           | 5/7 Agip Road Rumueme                                             | Obio/Akpor    | Rivers |
| 6923 | RV/0102 | RV/0102/S/6  | Palmers Hospital & Mat. Home       |                           | 5/7 Agip Road Rumueme                                             | Obio/Akpor    | Rivers |
| 6924 | RV/0102 | RV/0102/S/5  | Palmers Hospital & Mat. Home       |                           | 5/7 Agip Road Rumueme                                             | Obio/Akpor    | Rivers |
| 6925 | RV/0102 | RV/0102/S/3  | Palmers Hospital & Mat. Home       |                           | 5/7 Agip Road Rumueme                                             | Obio/Akpor    | Rivers |
| 6926 | RV/0102 | RV/0102/S/10 | Palmers Hospital & Mat. Home       |                           | 5/7 Agip Road Rumueme                                             | Obio/Akpor    | Rivers |
| 6927 | RV/0102 | RV/0102/S/1  | Palmers Hospital & Mat. Home       |                           | 5/7 Agip Road Rumueme                                             | Obio/Akpor    | Rivers |
| 6928 | RV/0103 | RV/0103/S/3  | Cresthill Medical Centre           |                           | 2a Uyo Street Rumueomasi                                          | Obio/Akpor    | Rivers |
| 6929 | RV/0103 | RV/0103/S/5  | Cresthill Medical Centre           |                           | 2a Uyo Street Rumueomasi                                          | Obio/Akpor    | Rivers |
| 6930 | RV/0103 | RV/0103/S/1  | Cresthill Medical Centre           |                           | 2a Uyo Street Rumueomasi                                          | Obio/Akpor    | Rivers |
| 6931 | RV/0104 | RV/0104/S/6  | St. Martins Hospital               |                           | 21 Stadium Road Port Harcourt                                     | Obio/Akpor    | Rivers |
| 6932 | RV/0104 | RV/0104/S/10 | St. Martins Hospital               |                           | 21 Stadium Road Port Harcourt                                     | Obio/Akpor    | Rivers |
| 6933 | RV/0104 | RV/0104/S/2  | St. Martins Hospital               |                           | 21 Stadium Road Port Harcourt                                     | Obio/Akpor    | Rivers |
| 6934 | RV/0104 | RV/0104/S/7  | St. Martins Hospital               |                           | 21 Stadium Road Port Harcourt                                     | Obio/Akpor    | Rivers |
| 6935 | RV/0104 | RV/0104/S/4  | St. Martins Hospital               |                           | 21 Stadium Road Port Harcourt                                     | Obio/Akpor    | Rivers |
| 6936 | RV/0104 | RV/0104/S/3  | St. Martins Hospital               |                           | 21 Stadium Road Port Harcourt                                     | Obio/Akpor    | Rivers |
| 6937 | RV/0104 | RV/0104/S/5  | St. Martins Hospital               |                           | 21 Stadium Road Port Harcourt                                     | Obio/Akpor    | Rivers |
| 6938 | RV/0104 | RV/0104/S/1  | St. Martins Hospital               |                           | 21 Stadium Road Port Harcourt                                     | Obio/Akpor    | Rivers |
| 6939 | RV/0106 | RV/0106/S/7  | Halten Clinic                      |                           | 11, Agudama Street, D/Line                                        | Port Harcourt | Rivers |
| 6940 | RV/0106 | RV/0106/S/4  | Halten Clinic                      |                           | 11, Agudama Street, D/Line                                        | Port Harcourt | Rivers |
| 6941 | RV/0106 | RV/0106/S/5  | Halten Clinic                      |                           | 11, Agudama Street, D/Line                                        | Port Harcourt | Rivers |
| 6942 | RV/0106 | RV/0106/S/6  | Halten Clinic                      |                           | 11, Agudama Street, D/Line                                        | Port Harcourt | Rivers |
| 6943 | RV/0106 | RV/0106/S/2  | Halten Clinic                      |                           | 11, Agudama Street, D/Line                                        | Port Harcourt | Rivers |
| 6944 | RV/0106 | RV/0106/S/1  | Halten Clinic                      |                           | 11, Agudama Street, D/Line                                        | Port Harcourt | Rivers |
| 6945 | RV/0106 | RV/0106/S/3  | Halten Clinic                      |                           | 11, Agudama Street, D/Line                                        | Port Harcourt | Rivers |
| 6946 | RV/0108 | RV/0108/S/2  | Carmel Clinic                      |                           | 3, Eleworks Drive, Rumuibekwe                                     | Obio/Akpor    | Rivers |
| 6947 | RV/0110 | RV/0110/S/5  | Ansett Diagnostic Hospital Limited |                           | 9, New Layout Drive, Oginigba Town, Trans-Amadi Industrial Layout | Port Harcourt | Rivers |
| 6948 | RV/0113 | RV/0113/S/5  | Harley Clinic                      | O&G, Laboratory           | 21B, Elizabamorazi Road                                           | Port Harcourt | Rivers |
| 6949 | RV/0113 | RV/0113/S/3  | Harley Clinic                      | O&G, Laboratory           | 21B, Elizabamorazi Road                                           | Port Harcourt | Rivers |
| 6950 | RV/0116 | RV/0116/S/15 | Opt-vue Eye Care                   | Ophthalmology             | 20 Forces Avenue, Old G.R.A.                                      | Port Harcourt | Rivers |
| 6951 | RV/0125 | RV/0125/S/8  | Cimbak Dental Clinic               | Dental                    | 15, Ekere street, Rumubiakani                                     | Obio/Akpor    | Rivers |
| 6952 | RV/0127 | RV/0127/S/13 | Vonnie Vision                      | Optometric                | Plot 23, Close 8, Elekahia                                        | Port Harcourt | Rivers |
| 6953 | RV/0129 | RV/0129/S/13 | Garet Eye Clinic                   | Optometric, Ophthalmology | 61B, Aba Road Beside Matinique restaurant                         | Obio/Akpor    | Rivers |
| 6954 | RV/0129 | RV/0129/S/15 | Garet Eye Clinic                   | Optometric, Ophthalmology | 61B, Aba Road Beside Matinique restaurant                         | Obio/Akpor    | Rivers |
| 6955 | RV/0130 | RV/0130/S/5  | Image Diagnostics                  | Radiology, Laboratory     | 23, Okoroji Street, D/Line                                        | Port Harcourt | Rivers |
| 6956 | RV/0130 | RV/0130/S/7  | Image Diagnostics                  | Radiology, Laboratory     | 23, Okoroji Street, D/Line                                        | Port Harcourt | Rivers |
| 6957 | RV/0133 | RV/0133/S/13 | Rambod Optometric                  | Optometry                 | 29/30, Kaduna Street, D/Line                                      | Port Harcourt | Rivers |
| 6958 | RV/0134 | RV/0134/S/13 | Nice View Eye Clinic               | Optometric                | 222, Ikwere Road, Mile 3, Beside Diamond Bank                     | Port Harcourt | Rivers |
| 6959 | RV/0138 | RV/0138/S/4  | Mc Pee Pharm. & Mech. Coy. Ltd     | Pharmacy                  | Rumuokita Junction                                                | Obio/Akpor    | Rivers |
| 6960 | RV/0141 | RV/0141/S/4  | Kebs Pharm. Ltd                    | Pharmacy                  | 12, Rumuogba Off Woji Junction.                                   | Obio/Akpor    | Rivers |

|      |         |              |                                            |            |                                                              |               |        |
|------|---------|--------------|--------------------------------------------|------------|--------------------------------------------------------------|---------------|--------|
| 6961 | RV/0142 | RV/0142/S/4  | Chindux Nig. Ltd.                          | Pharmacy   | 126, Woji Road, Rumuolu, P/Harcourt                          | Port Harcourt | Rivers |
| 6962 | RV/0144 | RV/0144/S/4  | Llyods Pharm. Ltd                          | Pharmacy   | 27, Agi Road, Mile 4, Rumuemene                              | Port Harcourt | Rivers |
| 6963 | RV/0149 | RV/0149/S/4  | Juchez Nig. Ltd.                           | Pharmacy   | 2, Ilorin Street Opp. Whyte, Shopping Complex Off Hospital R | Port Harcourt | Rivers |
| 6964 | RV/0153 | RV/0153/S/4  | Capino Pharmacy                            | Pharmacy   | 3, Rumuokoro Street, Rumuomasi                               | Obio/Akpor    | Rivers |
| 6965 | RV/0156 | RV/0156/S/4  | Olijibomen Nig. Ltd                        | Pharmacy   | 204, Aba Road, Rumuola                                       | Obio/Akpor    | Rivers |
| 6966 | RV/0157 | RV/0157/S/4  | Bydow Pharmacy                             | Pharmacy   | 19, Agudama Street, D/Line                                   | Port Harcourt | Rivers |
| 6967 | RV/0166 | RV/0166/S/5  | Port Harcourt Medical Investigation Centre | Laboratory | 15 Ikwere Street, By Emenike Junction Bus Stop               | Port Harcourt | Rivers |
| 6968 | RV/0167 | RV/0167/S/5  | Gekon Medical & Dia.Services               | Laboratory | 2, Nvuike Road, Off Okporo Road, Rumuadara                   | Port Harcourt | Rivers |
| 6969 | RV/0172 | RV/0172/S/4  | Barata Pharmacy                            | Pharmacy   | 416 Ikerre Road                                              | Obio/Akpor    | Rivers |
| 6970 | RV/0173 | RV/0173/S/4  | Condios Pharmacy                           | Pharmacy   | 141 Onne Road, G.R.A.                                        | Port Harcourt | Rivers |
| 6971 | RV/0176 | RV/0176/S/4  | E.J. Pharmacy Ltd                          | Pharmacy   | 26 Hospital Road                                             | Port Harcourt | Rivers |
| 6972 | RV/0177 | RV/0177/S/4  | Gravas Venture Ltd                         | Pharmacy   | 46 Woji Road                                                 | Obio/Akpor    | Rivers |
| 6973 | RV/0178 | RV/0178/S/4  | Sodel Pharmacy & Store Ltd                 | Pharmacy   | 23 Market road, rumuomasi                                    | Obio/Akpor    | Rivers |
| 6974 | RV/0180 | RV/0180/S/4  | Akoltem Nig. Ltd.,                         | Pharmacy   | 193 Aba Road, Rumuola Junction                               | Obio/Akpor    | Rivers |
| 6975 | RV/0181 | RV/0181/S/4  | Ausjone Pharmacy Ltd                       | Pharmacy   | 118 Rumuola Road                                             | Obio/Akpor    | Rivers |
| 6976 | RV/0185 | RV/0185/S/4  | Wilson Pharmaceutical Co.Nig.              | Pharmacy   | 13 East-West Road, Rumuodumaya                               | Port Harcourt | Rivers |
| 6977 | RV/0196 | RV/0196/S/4  | Midline pharmacy Nig.                      | Pharmacy   | 429, Ikwere Road, mile 5, Rumuepirikom                       | Obio/Akpor    | Rivers |
| 6978 | RV/0197 | RV/0197/S/4  | Sita Pharm. Ltd                            | Pharmacy   | 350A, Oluobasanjo Road                                       | Port Harcourt | Rivers |
| 6979 | RV/0200 | RV/0200/S/4  | Kayol Nig. Ltd.                            | Pharmacy   | Amadi-Ama Round About                                        | Port Harcourt | Rivers |
| 6980 | RV/0202 | RV/0202/S/4  | Gopez Nig. Ltd.                            | Pharmacy   | 3, Lagos Street                                              | Port Harcourt | Rivers |
| 6981 | RV/0205 | RV/0205/S/4  | Tegal Pharmacy                             | Pharmacy   | Rumuokoro Junction                                           | Obio/Akpor    | Rivers |
| 6982 | RV/0209 | RV/0209/S/5  | Hopeville Specialist Hospital              |            | Elijbolo-Eneka Road, Off New Airport Road, Elioizu           | Obio/Akpor    | Rivers |
| 6983 | RV/0209 | RV/0209/S/11 | Hopeville Specialist Hospital              |            | Elijbolo-Eneka Road, Off New Airport Road, Elioizu           | Obio/Akpor    | Rivers |
| 6984 | RV/0209 | RV/0209/S/1  | Hopeville Specialist Hospital              |            | Elijbolo-Eneka Road, Off New Airport Road, Elioizu           | Obio/Akpor    | Rivers |
| 6985 | RV/0209 | RV/0209/S/10 | Hopeville Specialist Hospital              |            | Elijbolo-Eneka Road, Off New Airport Road, Elioizu           | Obio/Akpor    | Rivers |
| 6986 | RV/0209 | RV/0209/S/7  | Hopeville Specialist Hospital              |            | Elijbolo-Eneka Road, Off New Airport Road, Elioizu           | Obio/Akpor    | Rivers |
| 6987 | RV/0210 | RV/0210/S/6  | Pamo Clinics & Hospital Ltd.               |            | 300 Aba Rd., Rumuomasi                                       | Obio/Akpor    | Rivers |
| 6988 | RV/0210 | RV/0210/S/5  | Pamo Clinics & Hospital Ltd.               |            | 300 Aba Rd., Rumuomasi                                       | Obio/Akpor    | Rivers |
| 6989 | RV/0210 | RV/0210/S/2  | Pamo Clinics & Hospital Ltd.               |            | 300 Aba Rd., Rumuomasi                                       | Obio/Akpor    | Rivers |
| 6990 | RV/0210 | RV/0210/S/7  | Pamo Clinics & Hospital Ltd.               |            | 300 Aba Rd., Rumuomasi                                       | Obio/Akpor    | Rivers |
| 6991 | RV/0210 | RV/0210/S/4  | Pamo Clinics & Hospital Ltd.               |            | 300 Aba Rd., Rumuomasi                                       | Obio/Akpor    | Rivers |
| 6992 | RV/0210 | RV/0210/S/3  | Pamo Clinics & Hospital Ltd.               |            | 300 Aba Rd., Rumuomasi                                       | Obio/Akpor    | Rivers |
| 6993 | RV/0210 | RV/0210/S/1  | Pamo Clinics & Hospital Ltd.               |            | 300 Aba Rd., Rumuomasi                                       | Obio/Akpor    | Rivers |
| 6994 | RV/0211 | RV/0211/S/5  | Bosom Hospital                             |            | 6, Akaniwo St, Off Eligbam Rd.                               | Obio/Akpor    | Rivers |
| 6995 | RV/0211 | RV/0211/S/2  | Bosom Hospital                             |            | 6, Akaniwo St, Off Eligbam Rd.                               | Obio/Akpor    | Rivers |
| 6996 | RV/0211 | RV/0211/S/4  | Bosom Hospital                             |            | 6, Akaniwo St, Off Eligbam Rd.                               | Obio/Akpor    | Rivers |
| 6997 | RV/0211 | RV/0211/S/15 | Bosom Hospital                             |            | 6, Akaniwo St, Off Eligbam Rd.                               | Obio/Akpor    | Rivers |
| 6998 | RV/0211 | RV/0211/S/10 | Bosom Hospital                             |            | 6, Akaniwo St, Off Eligbam Rd.                               | Obio/Akpor    | Rivers |
| 6999 | RV/0211 | RV/0211/S/6  | Bosom Hospital                             |            | 6, Akaniwo St, Off Eligbam Rd.                               | Obio/Akpor    | Rivers |
| 7000 | RV/0211 | RV/0211/S/3  | Bosom Hospital                             |            | 6, Akaniwo St, Off Eligbam Rd.                               | Obio/Akpor    | Rivers |
| 7001 | RV/0211 | RV/0211/S/1  | Bosom Hospital                             |            | 6, Akaniwo St, Off Eligbam Rd.                               | Obio/Akpor    | Rivers |
| 7002 | RV/0211 | RV/0211/S/11 | Bosom Hospital                             |            | 6, Akaniwo St, Off Eligbam Rd.                               | Obio/Akpor    | Rivers |
| 7003 | RV/0212 | RV/0212/S/3  | Cumi Medical Centre                        |            | 3, Endless Road, Off Elitor Rd, Woji                         | Obio/Akpor    | Rivers |
| 7004 | RV/0212 | RV/0212/S/6  | Cumi Medical Centre                        |            | 3, Endless Road, Off Elitor Rd, Woji                         | Obio/Akpor    | Rivers |
| 7005 | RV/0212 | RV/0212/S/5  | Cumi Medical Centre                        |            | 3, Endless Road, Off Elitor Rd, Woji                         | Obio/Akpor    | Rivers |
| 7006 | RV/0212 | RV/0212/S/1  | Cumi Medical Centre                        |            | 3, Endless Road, Off Elitor Rd, Woji                         | Obio/Akpor    | Rivers |
| 7007 | RV/0212 | RV/0212/S/4  | Cumi Medical Centre                        |            | 3, Endless Road, Off Elitor Rd, Woji                         | Obio/Akpor    | Rivers |

|      |         |              |                                              |            |                                                                      |               |        |
|------|---------|--------------|----------------------------------------------|------------|----------------------------------------------------------------------|---------------|--------|
| 7008 | RV/0213 | RV/0213/S/2  | Marina Hospital                              |            | 16 Akwa St, Off 35 Aba Rd, By Savannah Bank                          | Obio/Akpor    | Rivers |
| 7009 | RV/0213 | RV/0213/S/1  | Marina Hospital                              |            | 16 Akwa St, Off 35 Aba Rd, By Savannah Bank                          | Obio/Akpor    | Rivers |
| 7010 | RV/0213 | RV/0213/S/6  | Marina Hospital                              |            | 16 Akwa St, Off 35 Aba Rd, By Savannah Bank                          | Obio/Akpor    | Rivers |
| 7011 | RV/0213 | RV/0213/S/3  | Marina Hospital                              |            | 16 Akwa St, Off 35 Aba Rd, By Savannah Bank                          | Obio/Akpor    | Rivers |
| 7012 | RV/0213 | RV/0213/S/5  | Marina Hospital                              |            | 16 Akwa St, Off 35 Aba Rd, By Savannah Bank                          | Obio/Akpor    | Rivers |
| 7013 | RV/0214 | RV/0214/S/6  | Lifetime Medical Centre                      |            | 1A Worukwo St, Waterline, off Olusegun Obasanjo Rd.                  | Port Harcourt | Rivers |
| 7014 | RV/0214 | RV/0214/S/3  | Lifetime Medical Centre                      |            | 1A Worukwo St, Waterline, off Olusegun Obasanjo Rd.                  | Port Harcourt | Rivers |
| 7015 | RV/0214 | RV/0214/S/1  | Lifetime Medical Centre                      |            | 1A Worukwo St, Waterline, off Olusegun Obasanjo Rd.                  | Port Harcourt | Rivers |
| 7016 | RV/0214 | RV/0214/S/5  | Lifetime Medical Centre                      |            | 1A Worukwo St, Waterline, off Olusegun Obasanjo Rd.                  | Port Harcourt | Rivers |
| 7017 | RV/0215 | RV/0215/S/6  | Immanuel Clinic                              |            | 4, Nkanwa Lane, off NTA Rd Rumnokuta                                 | Port Harcourt | Rivers |
| 7018 | RV/0215 | RV/0215/S/3  | Immanuel Clinic                              |            | 4, Nkanwa Lane, off NTA Rd Rumnokuta                                 | Port Harcourt | Rivers |
| 7019 | RV/0215 | RV/0215/S/1  | Immanuel Clinic                              |            | 4, Nkanwa Lane, off NTA Rd Rumnokuta                                 | Port Harcourt | Rivers |
| 7020 | RV/0215 | RV/0215/S/2  | Immanuel Clinic                              |            | 4, Nkanwa Lane, off NTA Rd Rumnokuta                                 | Port Harcourt | Rivers |
| 7021 | RV/0215 | RV/0215/S/5  | Immanuel Clinic                              |            | 4, Nkanwa Lane, off NTA Rd Rumnokuta                                 | Port Harcourt | Rivers |
| 7022 | RV/0216 | RV/0216/S/5  | Jeconiah Children's Clinic                   |            | 4, Okoroji Lane, D/Line                                              | Port Harcourt | Rivers |
| 7023 | RV/0216 | RV/0216/S/6  | Jeconiah Children's Clinic                   |            | 4, Okoroji Lane, D/Line                                              | Port Harcourt | Rivers |
| 7024 | RV/0216 | RV/0216/S/4  | Jeconiah Children's Clinic                   |            | 4, Okoroji Lane, D/Line                                              | Port Harcourt | Rivers |
| 7025 | RV/0216 | RV/0216/S/1  | Jeconiah Children's Clinic                   |            | 4, Okoroji Lane, D/Line                                              | Port Harcourt | Rivers |
| 7026 | RV/0216 | RV/0216/S/3  | Jeconiah Children's Clinic                   |            | 4, Okoroji Lane, D/Line                                              | Port Harcourt | Rivers |
| 7027 | RV/0218 | RV/0218/S/4  | Nigeria Customs Service Med. Centre          |            | Nigeria Customs Service Medical Centre Port Harcourt-1, Rivers State | Port Harcourt | Rivers |
| 7028 | RV/0226 | RV/0226/S/3  | Castle Clinics                               |            | 7B Shell Location Road, Rumuadaolu, Off 42 Rumuola Rd., P/H          | Obio/Akpor    | Rivers |
| 7029 | RV/0226 | RV/0226/S/1  | Castle Clinics                               |            | 7B Shell Location Road, Rumuadaolu, Off 42 Rumuola Rd., P/H          | Obio/Akpor    | Rivers |
| 7030 | RV/0226 | RV/0226/S/11 | Castle Clinics                               |            | 7B Shell Location Road, Rumuadaolu, Off 42 Rumuola Rd., P/H          | Obio/Akpor    | Rivers |
| 7031 | RV/0226 | RV/0226/S/5  | Castle Clinics                               |            | 7B Shell Location Road, Rumuadaolu, Off 42 Rumuola Rd., P/H          | Obio/Akpor    | Rivers |
| 7032 | RV/0226 | RV/0226/S/2  | Castle Clinics                               |            | 7B Shell Location Road, Rumuadaolu, Off 42 Rumuola Rd., P/H          | Obio/Akpor    | Rivers |
| 7033 | RV/0226 | RV/0226/S/6  | Castle Clinics                               |            | 7B Shell Location Road, Rumuadaolu, Off 42 Rumuola Rd., P/H          | Obio/Akpor    | Rivers |
| 7034 | RV/0230 | RV/0230/S/5  | Health Wise Diagnostic Laboratory            | Laboratory | No.5 Chief Wopara Street, Rumuomasi, P/Harcourt                      | Obio/Akpor    | Rivers |
| 7035 | RV/0237 | RV/0237/S/7  | Cottage Hospital/Comprehensive Health Centre |            | Rivers State Police Command, Rivers State                            | Port Harcourt | Rivers |
| 7036 | RV/0237 | RV/0237/S/1  | Cottage Hospital/Comprehensive Health Centre |            | Rivers State Police Command, Rivers State                            | Port Harcourt | Rivers |
| 7037 | RV/0237 | RV/0237/S/5  | Cottage Hospital/Comprehensive Health Centre |            | Rivers State Police Command, Rivers State                            | Port Harcourt | Rivers |
| 7038 | RV/0237 | RV/0237/S/4  | Cottage Hospital/Comprehensive Health Centre |            | Rivers State Police Command, Rivers State                            | Port Harcourt | Rivers |
| 7039 | RV/0237 | RV/0237/S/8  | Cottage Hospital/Comprehensive Health Centre |            | Rivers State Police Command, Rivers State                            | Port Harcourt | Rivers |
| 7040 | RV/0237 | RV/0237/S/3  | Cottage Hospital/Comprehensive Health Centre |            | Rivers State Police Command, Rivers State                            | Port Harcourt | Rivers |
| 7041 | RV/0241 | RV/0241/S/1  | Precious Life Medical Centre                 |            | 4 Okorodo street D/line                                              | Port Harcourt | Rivers |
| 7042 | RV/0241 | RV/0241/S/3  | Precious Life Medical Centre                 |            | 4 Okorodo street D/line                                              | Port Harcourt | Rivers |
| 7043 | RV/0241 | RV/0241/S/5  | Precious Life Medical Centre                 |            | 4 Okorodo street D/line                                              | Port Harcourt | Rivers |

|      |         |              |                                    |  |                                              |               |        |
|------|---------|--------------|------------------------------------|--|----------------------------------------------|---------------|--------|
| 7044 | RV/0242 | RV/0242/S/2  | Sondel Clinic And Maternity        |  | Plot 12 Phase 1 Borikiri Residential layout  | Port Harcourt | Rivers |
| 7045 | RV/0242 | RV/0242/S/5  | Sondel Clinic And Maternity        |  | Plot 12 Phase 1 Borikiri Residential layout  | Port Harcourt | Rivers |
| 7046 | RV/0243 | RV/0243/S/6  | St Michael's Clinic                |  | 4th Street, Block 4 Elekaha Housing Estate   | Port Harcourt | Rivers |
| 7047 | RV/0243 | RV/0243/S/2  | St Michael's Clinic                |  | 4th Street, Block 4 Elekaha Housing Estate   | Port Harcourt | Rivers |
| 7048 | RV/0243 | RV/0243/S/3  | St Michael's Clinic                |  | 4th Street, Block 4 Elekaha Housing Estate   | Port Harcourt | Rivers |
| 7049 | RV/0243 | RV/0243/S/1  | St Michael's Clinic                |  | 4th Street, Block 4 Elekaha Housing Estate   | Port Harcourt | Rivers |
| 7050 | RV/0243 | RV/0243/S/5  | St Michael's Clinic                |  | 4th Street, Block 4 Elekaha Housing Estate   | Port Harcourt | Rivers |
| 7051 | RV/0244 | RV/0244/S/5  | Divine Grace Clinic/Maternity      |  | 21 Elijiji Road, Off Woji Road , P/Harcourt  | Obio/Akpor    | Rivers |
| 7052 | RV/0244 | RV/0244/S/3  | Divine Grace Clinic/Maternity      |  | 21 Elijiji Road, Off Woji Road , P/Harcourt  | Obio/Akpor    | Rivers |
| 7053 | RV/0244 | RV/0244/S/1  | Divine Grace Clinic/Maternity      |  | 21 Elijiji Road, Off Woji Road , P/Harcourt  | Obio/Akpor    | Rivers |
| 7054 | RV/0244 | RV/0244/S/2  | Divine Grace Clinic/Maternity      |  | 21 Elijiji Road, Off Woji Road , P/Harcourt  | Obio/Akpor    | Rivers |
| 7055 | RV/0245 | RV/0245/S/3  | Udo PolyClinics                    |  | 9/10 Chief Ejim"'s Street Rumubiakani P/H    | Obio/Akpor    | Rivers |
| 7056 | RV/0245 | RV/0245/S/5  | Udo PolyClinics                    |  | 9/10 Chief Ejim"'s Street Rumubiakani P/H    | Obio/Akpor    | Rivers |
| 7057 | RV/0245 | RV/0245/S/1  | Udo PolyClinics                    |  | 9/10 Chief Ejim"'s Street Rumubiakani P/H    | Obio/Akpor    | Rivers |
| 7058 | RV/0245 | RV/0245/S/6  | Udo PolyClinics                    |  | 9/10 Chief Ejim"'s Street Rumubiakani P/H    | Obio/Akpor    | Rivers |
| 7059 | RV/0245 | RV/0245/S/2  | Udo PolyClinics                    |  | 9/10 Chief Ejim"'s Street Rumubiakani P/H    | Obio/Akpor    | Rivers |
| 7060 | RV/0245 | RV/0245/S/4  | Udo PolyClinics                    |  | 9/10 Chief Ejim"'s Street Rumubiakani P/H    | Obio/Akpor    | Rivers |
| 7061 | RV/0245 | RV/0245/S/7  | Udo PolyClinics                    |  | 9/10 Chief Ejim"'s Street Rumubiakani P/H    | Obio/Akpor    | Rivers |
| 7062 | RV/0246 | RV/0246/S/3  | Datta Medical Centre               |  | 21A Woji Road, Off Old Aba Road, P/H         | Obio/Akpor    | Rivers |
| 7063 | RV/0246 | RV/0246/S/1  | Datta Medical Centre               |  | 21A Woji Road, Off Old Aba Road, P/H         | Obio/Akpor    | Rivers |
| 7064 | RV/0246 | RV/0246/S/5  | Datta Medical Centre               |  | 21A Woji Road, Off Old Aba Road, P/H         | Obio/Akpor    | Rivers |
| 7065 | RV/0247 | RV/0247/S/1  | Higgwe Memorial Hospital           |  | 644 Ikwerre Road Rumuokoro P/H               | Obio/Akpor    | Rivers |
| 7066 | RV/0247 | RV/0247/S/7  | Higgwe Memorial Hospital           |  | 644 Ikwerre Road Rumuokoro P/H               | Obio/Akpor    | Rivers |
| 7067 | RV/0250 | RV/0250/S/5  | Eli Johnson Specialist Hospital    |  | 13 Bori Road, Rumuibekwe Housing Estate, P/H | Obio/Akpor    | Rivers |
| 7068 | RV/0251 | RV/0251/S/5  | Health Fountains Hospital          |  | NTA/Uniport Road , Ozuoba, P/H               | Obio/Akpor    | Rivers |
| 7069 | RV/0251 | RV/0251/S/3  | Health Fountains Hospital          |  | NTA/Uniport Road , Ozuoba, P/H               | Obio/Akpor    | Rivers |
| 7070 | RV/0251 | RV/0251/S/1  | Health Fountains Hospital          |  | NTA/Uniport Road , Ozuoba, P/H               | Obio/Akpor    | Rivers |
| 7071 | RV/0253 | RV/0253/S/3  | Summit Clinic                      |  | 17 Omoku Street, D/line, P/H                 | Port Harcourt | Rivers |
| 7072 | RV/0253 | RV/0253/S/1  | Summit Clinic                      |  | 17 Omoku Street, D/line, P/H                 | Port Harcourt | Rivers |
| 7073 | RV/0253 | RV/0253/S/5  | Summit Clinic                      |  | 17 Omoku Street, D/line, P/H                 | Port Harcourt | Rivers |
| 7074 | RV/0254 | RV/0254/S/1  | Daily Spring Hospital Ltd          |  | 11 Rumuigbo Street, Old GRA, P/H             | Port Harcourt | Rivers |
| 7075 | RV/0254 | RV/0254/S/7  | Daily Spring Hospital Ltd          |  | 11 Rumuigbo Street, Old GRA, P/H             | Port Harcourt | Rivers |
| 7076 | RV/0254 | RV/0254/S/5  | Daily Spring Hospital Ltd          |  | 11 Rumuigbo Street, Old GRA, P/H             | Port Harcourt | Rivers |
| 7077 | RV/0254 | RV/0254/S/6  | Daily Spring Hospital Ltd          |  | 11 Rumuigbo Street, Old GRA, P/H             | Port Harcourt | Rivers |
| 7078 | RV/0254 | RV/0254/S/3  | Daily Spring Hospital Ltd          |  | 11 Rumuigbo Street, Old GRA, P/H             | Port Harcourt | Rivers |
| 7079 | RV/0254 | RV/0254/S/2  | Daily Spring Hospital Ltd          |  | 11 Rumuigbo Street, Old GRA, P/H             | Port Harcourt | Rivers |
| 7080 | RV/0255 | RV/0255/S/1  | Silvia Specialist Clinic/Maternity |  | 6 Circular Road, Phase 2 Presidential Estate | Port Harcourt | Rivers |
| 7081 | RV/0255 | RV/0255/S/6  | Silvia Specialist Clinic/Maternity |  | 6 Circular Road, Phase 2 Presidential Estate | Port Harcourt | Rivers |
| 7082 | RV/0255 | RV/0255/S/5  | Silvia Specialist Clinic/Maternity |  | 6 Circular Road, Phase 2 Presidential Estate | Port Harcourt | Rivers |
| 7083 | RV/0255 | RV/0255/S/14 | Silvia Specialist Clinic/Maternity |  | 6 Circular Road, Phase 2 Presidential Estate | Port Harcourt | Rivers |
| 7084 | RV/0255 | RV/0255/S/15 | Silvia Specialist Clinic/Maternity |  | 6 Circular Road, Phase 2 Presidential Estate | Port Harcourt | Rivers |
| 7085 | RV/0255 | RV/0255/S/2  | Silvia Specialist Clinic/Maternity |  | 6 Circular Road, Phase 2 Presidential Estate | Port Harcourt | Rivers |
| 7086 | RV/0255 | RV/0255/S/10 | Silvia Specialist Clinic/Maternity |  | 6 Circular Road, Phase 2 Presidential Estate | Port Harcourt | Rivers |



|      |         |              |                               |                                                                                          |                                                                                                              |               |        |
|------|---------|--------------|-------------------------------|------------------------------------------------------------------------------------------|--------------------------------------------------------------------------------------------------------------|---------------|--------|
| 7087 | RV/0256 | RV/0256/S/5  | El- Bene Hospital             |                                                                                          | 5 El Bene Close, Off Ada George Road Rumuchiorlu Street, by Open Doors Church Junction, Rumueme, Mile 4, P/H | Port Harcourt | Rivers |
| 7088 | RV/0256 | RV/0256/S/3  | El- Bene Hospital             |                                                                                          | 5 El Bene Close, Off Ada George Road Rumuchiorlu Street, by Open Doors Church Junction, Rumueme, Mile 4, P/H | Port Harcourt | Rivers |
| 7089 | RV/0256 | RV/0256/S/1  | El- Bene Hospital             |                                                                                          | 5 El Bene Close, Off Ada George Road Rumuchiorlu Street, by Open Doors Church Junction, Rumueme, Mile 4, P/H | Port Harcourt | Rivers |
| 7090 | RV/0257 | RV/0257/S/6  | Seiyefa Clinic                |                                                                                          | 11 Harold Wilson Drive , Borikiri, P/H                                                                       | Port Harcourt | Rivers |
| 7091 | RV/0257 | RV/0257/S/2  | Seiyefa Clinic                |                                                                                          | 11 Harold Wilson Drive , Borikiri, P/H                                                                       | Port Harcourt | Rivers |
| 7092 | RV/0257 | RV/0257/S/1  | Seiyefa Clinic                |                                                                                          | 11 Harold Wilson Drive , Borikiri, P/H                                                                       | Port Harcourt | Rivers |
| 7093 | RV/0257 | RV/0257/S/3  | Seiyefa Clinic                |                                                                                          | 11 Harold Wilson Drive , Borikiri, P/H                                                                       | Port Harcourt | Rivers |
| 7094 | RV/0257 | RV/0257/S/7  | Seiyefa Clinic                |                                                                                          | 11 Harold Wilson Drive , Borikiri, P/H                                                                       | Port Harcourt | Rivers |
| 7095 | RV/0257 | RV/0257/S/5  | Seiyefa Clinic                |                                                                                          | 11 Harold Wilson Drive , Borikiri, P/H                                                                       | Port Harcourt | Rivers |
| 7096 | RV/0258 | RV/0258/S/2  | Heart Health Medical Services |                                                                                          | 14 Omoku Street, D/line, P/H                                                                                 | Port Harcourt | Rivers |
| 7097 | RV/0260 | RV/0260/S/3  | Hope Clinics                  |                                                                                          | 3/4 Wokogoloma Street, Waterline, P/H                                                                        | Port Harcourt | Rivers |
| 7098 | RV/0260 | RV/0260/S/5  | Hope Clinics                  |                                                                                          | 3/4 Wokogoloma Street, Waterline, P/H                                                                        | Port Harcourt | Rivers |
| 7099 | RV/0260 | RV/0260/S/1  | Hope Clinics                  |                                                                                          | 3/4 Wokogoloma Street, Waterline, P/H                                                                        | Port Harcourt | Rivers |
| 7100 | RV/0261 | RV/0261/S/5  | Krisany Medical Services      |                                                                                          | 5B Asinobi/Agudama Street, D/line, P/H                                                                       | Port Harcourt | Rivers |
| 7101 | RV/0261 | RV/0261/S/3  | Krisany Medical Services      |                                                                                          | 5B Asinobi/Agudama Street, D/line, P/H                                                                       | Port Harcourt | Rivers |
| 7102 | RV/0261 | RV/0261/S/6  | Krisany Medical Services      |                                                                                          | 5B Asinobi/Agudama Street, D/line, P/H                                                                       | Port Harcourt | Rivers |
| 7103 | RV/0261 | RV/0261/S/1  | Krisany Medical Services      |                                                                                          | 5B Asinobi/Agudama Street, D/line, P/H                                                                       | Port Harcourt | Rivers |
| 7104 | RV/0263 | RV/0263/S/5  | Atinu Critical Care Hospital  |                                                                                          | Old Refinery Road , P/H                                                                                      | Obio/Akpor    | Rivers |
| 7105 | RV/0263 | RV/0263/S/1  | Atinu Critical Care Hospital  |                                                                                          | Old Refinery Road , P/H                                                                                      | Obio/Akpor    | Rivers |
| 7106 | RV/0263 | RV/0263/S/3  | Atinu Critical Care Hospital  |                                                                                          | Old Refinery Road , P/H                                                                                      | Obio/Akpor    | Rivers |
| 7107 | RV/0265 | RV/0265/S/1  | Promise Land Clinic           |                                                                                          | 4 Bende Street, Rumuomas, i P/H                                                                              | Obio/Akpor    | Rivers |
| 7108 | RV/0265 | RV/0265/S/3  | Promise Land Clinic           |                                                                                          | 4 Bende Street, Rumuomas, i P/H                                                                              | Obio/Akpor    | Rivers |
| 7109 | RV/0265 | RV/0265/S/5  | Promise Land Clinic           |                                                                                          | 4 Bende Street, Rumuomas, i P/H                                                                              | Obio/Akpor    | Rivers |
| 7110 | RV/0265 | RV/0265/S/2  | Promise Land Clinic           |                                                                                          | 4 Bende Street, Rumuomas, i P/H                                                                              | Obio/Akpor    | Rivers |
| 7111 | RV/0265 | RV/0265/S/6  | Promise Land Clinic           |                                                                                          | 4 Bende Street, Rumuomas, i P/H                                                                              | Obio/Akpor    | Rivers |
| 7112 | RV/0267 | RV/0267/S/3  | Salem Hospital                |                                                                                          | 16 Location Road, Oyigbo, P/H                                                                                | Oyigbo        | Rivers |
| 7113 | RV/0267 | RV/0267/S/1  | Salem Hospital                |                                                                                          | 16 Location Road, Oyigbo, P/H                                                                                | Oyigbo        | Rivers |
| 7114 | RV/0297 | RV/0297/S/11 | Body Care Nig. Ltd            | Physiotherapy                                                                            | 46 Chief Wopara Street, Rumubiakani, P/H                                                                     | Obio/Akpor    | Rivers |
| 7115 | RV/0299 | RV/0299/S/10 | Riverside Clinics             | Internal Medicine,Radiology/USS,Paediatrics, General Surgery,O&G,Laboratory,Orthopaedics | 11 Harbour Road, P/H                                                                                         | Port Harcourt | Rivers |
| 7116 | RV/0299 | RV/0299/S/6  | Riverside Clinics             | Internal Medicine,Radiology/USS,Paediatrics, General Surgery,O&G,Laboratory,Orthopaedics | 11 Harbour Road, P/H                                                                                         | Port Harcourt | Rivers |
| 7117 | RV/0299 | RV/0299/S/5  | Riverside Clinics             | Internal Medicine,Radiology/USS,Paediatrics, General Surgery,O&G,Laboratory,Orthopaedics | 11 Harbour Road, P/H                                                                                         | Port Harcourt | Rivers |

|      |         |              |                               |                                                                                          |                                                                      |               |        |
|------|---------|--------------|-------------------------------|------------------------------------------------------------------------------------------|----------------------------------------------------------------------|---------------|--------|
| 7118 | RV/0299 | RV/0299/S/3  | Riverside Clinics             | Internal Medicine,Radiology/USS,Paediatrics, General Surgery,O&G,Laboratory,Orthopaedics | 11 Harbour Road, P/H                                                 | Port Harcourt | Rivers |
| 7119 | RV/0299 | RV/0299/S/1  | Riverside Clinics             | Internal Medicine,Radiology/USS,Paediatrics, General Surgery,O&G,Laboratory,Orthopaedics | 11 Harbour Road, P/H                                                 | Port Harcourt | Rivers |
| 7120 | RV/0299 | RV/0299/S/2  | Riverside Clinics             | Internal Medicine,Radiology/USS,Paediatrics, General Surgery,O&G,Laboratory,Orthopaedics | 11 Harbour Road, P/H                                                 | Port Harcourt | Rivers |
| 7121 | RV/0311 | RV/0311/S/8  | St Michael Dental Clinic      | Dental                                                                                   | 52 PH-Aba Expressway, P/H                                            | Port Harcourt | Rivers |
| 7122 | RV/0312 | RV/0312/S/15 | Flomat Eye Care               | Ophthalmic                                                                               | 169 Aba Road, P/H                                                    | Port Harcourt | Rivers |
| 7123 | RV/0313 | RV/0313/S/15 | C&C Optician Ltd              | Ophthalmology                                                                            | 63B King Perekule Street, GRA Phase II, P/H                          | Surulere      | Lagos  |
| 7124 | RV/0315 | RV/0315/S/13 | Niger Optical Services Ltd    | Optometry                                                                                | 18 Emenike Street, Mile One, Diobu, Rivers State                     | Port Harcourt | Rivers |
| 7125 | RV/0316 | RV/0316/S/13 | Niger Optical Services Ltd    | Optometry                                                                                | Plot 8, Aba- P/Harcourt Expr. Road, Rumuibekwe                       | Obio/Akpor    | Rivers |
| 7126 | RV/0318 | RV/0318/S/5  | Savanna Atlantic Diagnostic   | Laboratory                                                                               | 5 PH-Aba Expressway, Opp. Oceanic Bank, P/Harcourt                   | Obio/Akpor    | Rivers |
| 7127 | RV/0320 | RV/0320/S/5  | Nina Laboratory Ltd           | Laboratory                                                                               | 50, 2nd Floor Woji Road, Rumuolu, P/Harcourt                         | Obio/Akpor    | Rivers |
| 7128 | RV/0323 | RV/0323/S/5  | Raha Medical Laboratory       | Laboratory                                                                               | 24 Bende Street, Rumuomasi, P/Harcourt                               | Port Harcourt | Rivers |
| 7129 | RV/0325 | RV/0325/S/4  | Oliskan Pharm. Chemist        | Pharmacy                                                                                 | 1 Hospital Road by Station B/Stop, P/Harcourt                        | Port Harcourt | Rivers |
| 7130 | RV/0326 | RV/0326/S/4  | Medicine Mart                 | Pharmacy                                                                                 | 90, Evo Road, GRA Phase II, P/Harcourt                               | Port Harcourt | Rivers |
| 7131 | RV/0328 | RV/0328/S/4  | Edyee Pharm. Chemist Ltd      | Pharmacy                                                                                 | 108 Ahoada Road, Omoku, P/Harcourt, River State                      | Port Harcourt | Rivers |
| 7132 | RV/0329 | RV/0329/S/4  | Olive Hands Pharmacy & Stores | Pharmacy                                                                                 | 10B Omoku Street, off Olu Obasanjo Str., P/Harcourt                  | Port Harcourt | Rivers |
| 7133 | RV/0331 | RV/0331/S/4  | Luck Pharmacy International   | Pharmacy                                                                                 | 4A, Ohiamini Street Off Olu-Obasanjo Road, P/Harcourt                | Port Harcourt | Rivers |
| 7134 | RV/0333 | RV/0333/S/4  | I & C Pharmacy                | Pharmacy                                                                                 | 8 Agip Road, Rumueme                                                 | Obio/Akpor    | Rivers |
| 7135 | RV/0334 | RV/0334/S/4  | Mentor Health Service (Pharm) | Pharmacy                                                                                 | 3 Elemenwo Road, off Oil Mill Junction, R/kurushi, P/Harcourt        | Obio/Akpor    | Rivers |
| 7136 | RV/0335 | RV/0335/S/4  | Ostar Pharmacy Ltd.           | Pharmacy                                                                                 | 29, Agudama Street, D/Line, P/Harcourt                               | Port Harcourt | Rivers |
| 7137 | RV/0337 | RV/0337/S/4  | Choola Pharmacy               | Pharmacy                                                                                 | 18 Rumuodaola, Rumuola, P/Harcourt                                   | Port Harcourt | Rivers |
| 7138 | RV/0339 | RV/0339/S/5  | Saphonyx Pharm. Ltd           | Pharmacy                                                                                 | 106, Rumuola Road, P/Harcourt                                        | Port Harcourt | Rivers |
| 7139 | RV/0340 | RV/0340/S/4  | Sazel Pharmacy Ltd            | Pharmacy                                                                                 | 103, NTA-Choba Road, P/Harcourt                                      | Obio/Akpor    | Rivers |
| 7140 | RV/0341 | RV/0341/S/4  | Gottgabe Pharm.               | Pharmacy                                                                                 | Suite 9 Grumo Plaza, Rumukwurushi, P/Harcourt                        | Obio/Akpor    | Rivers |
| 7141 | RV/0342 | RV/0342/S/4  | Biomade Pharm. Ltd            | Pharmacy                                                                                 | 38, Igwuruta Road, Rumukwurushi, P/Harcourt                          | Obio/Akpor    | Rivers |
| 7142 | RV/0345 | RV/0345/S/4  | Klavid Pharm. Ltd.            | Pharmacy                                                                                 | Suite 022 Parklane Boulevard, P/Harcourt                             | Port Harcourt | Rivers |
| 7143 | RV/0346 | RV/0346/S/4  | Nalyn Global Pharmacy         | Pharmacy                                                                                 | 36 Elekahia Road, P/Harcourt                                         | Port Harcourt | Rivers |
| 7144 | RV/0347 | RV/0347/S/4  | Lizendic Pharm & Stores       | Pharmacy                                                                                 | 259, Okporo Road, East-West Road, off Rumuodara Junction, P/Harcourt | Obio/Akpor    | Rivers |
| 7145 | RV/0351 | RV/0351/S/3  | CRI Medi Clinic               |                                                                                          | Plot 80A Second Avenue, Along Dr. Peter Odili Street, P/Harcourt     | Port Harcourt | Rivers |
| 7146 | RV/0351 | RV/0351/S/6  | CRI Medi Clinic               |                                                                                          | Plot 80A Second Avenue, Along Dr. Peter Odili Street, P/Harcourt     | Port Harcourt | Rivers |
| 7147 | RV/0351 | RV/0351/S/2  | CRI Medi Clinic               |                                                                                          | Plot 80A Second Avenue, Along Dr. Peter Odili Street, P/Harcourt     | Port Harcourt | Rivers |
| 7148 | RV/0351 | RV/0351/S/5  | CRI Medi Clinic               |                                                                                          | Plot 80A Second Avenue, Along Dr. Peter Odili Street, P/Harcourt     | Port Harcourt | Rivers |

|      |         |              |                                                |                       |                                                                  |                   |        |
|------|---------|--------------|------------------------------------------------|-----------------------|------------------------------------------------------------------|-------------------|--------|
| 7149 | RV/0351 | RV/0351/S/4  | CRI Medi Clinic                                |                       | Plot 80A Second Avenue, Along Dr. Peter Odili Street, P/Harcourt | Port Harcourt     | Rivers |
| 7150 | RV/0351 | RV/0351/S/1  | CRI Medi Clinic                                |                       | Plot 80A Second Avenue, Along Dr. Peter Odili Street, P/Harcourt | Port Harcourt     | Rivers |
| 7151 | RV/0353 | RV/0353/S/1  | Bethsaida Clinic & Maternity                   |                       | 21, Pipeline Satelite Town, Oyibo, Rivers State                  | Oyigbo            | Rivers |
| 7152 | RV/0356 | RV/0356/S/5  | Life Care Medical Centre                       |                       | 3 Azikiwe street Mile 11 Diobu P/ Harcourt                       | Port Harcourt     | Rivers |
| 7153 | RV/0356 | RV/0356/S/4  | Life Care Medical Centre                       |                       | 3 Azikiwe street Mile 11 Diobu P/ Harcourt                       | Port Harcourt     | Rivers |
| 7154 | RV/0356 | RV/0356/S/7  | Life Care Medical Centre                       |                       | 3 Azikiwe street Mile 11 Diobu P/ Harcourt                       | Port Harcourt     | Rivers |
| 7155 | RV/0356 | RV/0356/S/13 | Life Care Medical Centre                       |                       | 3 Azikiwe street Mile 11 Diobu P/ Harcourt                       | Port Harcourt     | Rivers |
| 7156 | RV/0356 | RV/0356/S/3  | Life Care Medical Centre                       |                       | 3 Azikiwe street Mile 11 Diobu P/ Harcourt                       | Port Harcourt     | Rivers |
| 7157 | RV/0356 | RV/0356/S/1  | Life Care Medical Centre                       |                       | 3 Azikiwe street Mile 11 Diobu P/ Harcourt                       | Port Harcourt     | Rivers |
| 7158 | RV/0357 | RV/0357/S/5  | Life Clinics Medical Centre                    |                       | 15 Uyo street, Mile 1 Diobu P/ Harcourt                          | Port Harcourt     | Rivers |
| 7159 | RV/0357 | RV/0357/S/1  | Life Clinics Medical Centre                    |                       | 15 Uyo street, Mile 1 Diobu P/ Harcourt                          | Port Harcourt     | Rivers |
| 7160 | RV/0357 | RV/0357/S/14 | Life Clinics Medical Centre                    |                       | 15 Uyo street, Mile 1 Diobu P/ Harcourt                          | Port Harcourt     | Rivers |
| 7161 | RV/0357 | RV/0357/S/13 | Life Clinics Medical Centre                    |                       | 15 Uyo street, Mile 1 Diobu P/ Harcourt                          | Port Harcourt     | Rivers |
| 7162 | RV/0359 | RV/0359/S/1  | Rehoboth Specialist Hospital                   |                       | 2 Winners"" way off Afam str,D-line P/Harcourt                   | Port Harcourt     | Rivers |
| 7163 | RV/0359 | RV/0359/S/2  | Rehoboth Specialist Hospital                   |                       | 2 Winners"" way off Afam str,D-line P/Harcourt                   | Port Harcourt     | Rivers |
| 7164 | RV/0359 | RV/0359/S/10 | Rehoboth Specialist Hospital                   |                       | 2 Winners"" way off Afam str,D-line P/Harcourt                   | Port Harcourt     | Rivers |
| 7165 | RV/0359 | RV/0359/S/4  | Rehoboth Specialist Hospital                   |                       | 2 Winners"" way off Afam str,D-line P/Harcourt                   | Port Harcourt     | Rivers |
| 7166 | RV/0359 | RV/0359/S/5  | Rehoboth Specialist Hospital                   |                       | 2 Winners"" way off Afam str,D-line P/Harcourt                   | Port Harcourt     | Rivers |
| 7167 | RV/0359 | RV/0359/S/3  | Rehoboth Specialist Hospital                   |                       | 2 Winners"" way off Afam str,D-line P/Harcourt                   | Port Harcourt     | Rivers |
| 7168 | RV/0361 | RV/0361/S/3  | TRUVINE SPECIALIST CLINIC                      |                       | 6 OHIAMINI RD, BEHIND COLL OF ARTS & SCI OFF R/OLA P/HARCOURT    | Obio/Akpor        | Rivers |
| 7169 | RV/0361 | RV/0361/S/10 | TRUVINE SPECIALIST CLINIC                      |                       | 6 OHIAMINI RD, BEHIND COLL OF ARTS & SCI OFF R/OLA P/HARCOURT    | Obio/Akpor        | Rivers |
| 7170 | RV/0361 | RV/0361/S/1  | TRUVINE SPECIALIST CLINIC                      |                       | 6 OHIAMINI RD, BEHIND COLL OF ARTS & SCI OFF R/OLA P/HARCOURT    | Obio/Akpor        | Rivers |
| 7171 | RV/0363 | RV/0363/S/8  | FEDERAL STAFF DENTAL CLINIC                    |                       | FEDERAL SECRETARIAT, ABA RD,P/HARCURT                            | Obio/Akpor        | Rivers |
| 7172 | RV/0366 | RV/0366/S/5  | OGO DIAGNOSTIC CENTRE                          | Laboratory            | 16 AHOADA RD, OMOKU                                              | Ogba/Egbema/Ndoni | Rivers |
| 7173 | RV/0371 | RV/0371/S/4  | Phamarama Pharmacy & Store                     | Pharmacy              | 48 Force Avenue, Old GRA, Port Harcourt                          | Port Harcourt     | Rivers |
| 7174 | RV/0373 | RV/0373/S/4  | Carelink Pharmacy                              |                       | 54 Abuloma Road, Trans-Amadi                                     | Port Harcourt     | Rivers |
| 7175 | RV/0374 | RV/0374/S/8  | Esteem Dental Clinic                           | Dental                | 51 Isiokepo Street Off Aguadama Street D/Line Port Harcourt      | Port Harcourt     | Rivers |
| 7176 | RV/0375 | RV/0375/S/7  | AB Health Consortium                           | Laboratory, Radiology | Nzimiro Street, Amadi Flats, Port Harcourt                       | Port Harcourt     | Rivers |
| 7177 | RV/0375 | RV/0375/S/5  | AB Health Consortium                           | Laboratory, Radiology | Nzimiro Street, Amadi Flats, Port Harcourt                       | Port Harcourt     | Rivers |
| 7178 | RV/0378 | RV/0378/S/3  | The Shield Clinics                             |                       | Plot 4 Close D, Peace Estate, Trans Woji Road, Port Harcourt     | Obio/Akpor        | Rivers |
| 7179 | RV/0380 | RV/0380/S/8  | First Gate Dental Clinic                       |                       | 4a Barley Street, Old G.R.A, Port Harcourt Rivers State          | Port Harcourt     | Rivers |
| 7180 | RV/0381 | RV/0381/S/6  | Adanta Children`s Hospital                     |                       | 44 Evo Road GRA Phase2, Port Harcourt Rivers State               | Port Harcourt     | Rivers |
| 7181 | RV/0388 | RV/0388/S/5  | Life Line Clinic                               |                       | 30 Rumunduru RD, Eliowhani Kingdom ,Port Harcourt Rivers State   | Obio/Akpor        | Rivers |
| 7182 | RV/0390 | RV/0390/S/3  | Noble Medical Consultants & Fertility Hospital |                       | No.1 Bloom breed School Road Mgbuoba Opp. NTA Gate Rivers State  | Obio/Akpor        | Rivers |

|      |         |             |                                |  |                                                                                                                 |               |        |
|------|---------|-------------|--------------------------------|--|-----------------------------------------------------------------------------------------------------------------|---------------|--------|
| 7183 | RV/0392 | RV/0392/S/2 | Kendox Medical Services        |  | No 7, Moses Chinda Avenue, Off 194 Elemenwo Port Harcourt Rivers State                                          | Obio/Akpor    | Rivers |
| 7184 | RV/0392 | RV/0392/S/5 | Kendox Medical Services        |  | No 7, Moses Chinda Avenue, Off 194 Elemenwo Port Harcourt Rivers State                                          | Obio/Akpor    | Rivers |
| 7185 | RV/0392 | RV/0392/S/6 | Kendox Medical Services        |  | No 7, Moses Chinda Avenue, Off 194 Elemenwo Port Harcourt Rivers State                                          | Obio/Akpor    | Rivers |
| 7186 | RV/0392 | RV/0392/S/1 | Kendox Medical Services        |  | No 7, Moses Chinda Avenue, Off 194 Elemenwo Port Harcourt Rivers State                                          | Obio/Akpor    | Rivers |
| 7187 | RV/0392 | RV/0392/S/3 | Kendox Medical Services        |  | No 7, Moses Chinda Avenue, Off 194 Elemenwo Port Harcourt Rivers State                                          | Obio/Akpor    | Rivers |
| 7188 | RV/0395 | RV/0395/S/3 | Jose Vital Hospital Limited    |  | Plot 19, East West RD, By Rumuokoro Near St. Jude Catholic Church, Port Harcourt                                | Obio/Akpor    | Rivers |
| 7189 | RV/0395 | RV/0395/S/1 | Jose Vital Hospital Limited    |  | Plot 19, East West RD, By Rumuokoro Near St. Jude Catholic Church, Port Harcourt                                | Obio/Akpor    | Rivers |
| 7190 | RV/0398 | RV/0398/S/3 | Danferd Specialist Clinic      |  | 246, Ada George Road, Opposite Romans Filling Station By Okuton Junction River State                            | Obio/Akpor    | Rivers |
| 7191 | RV/0402 | RV/0402/S/2 | Atlantic Medical Center        |  | 76c Emekuku Street/Line, Port Harcourt, Rivers State                                                            | Port Harcourt | Rivers |
| 7192 | RV/0402 | RV/0402/S/3 | Atlantic Medical Center        |  | 76c Emekuku Street/Line, Port Harcourt, Rivers State                                                            | Port Harcourt | Rivers |
| 7193 | RV/0402 | RV/0402/S/7 | Atlantic Medical Center        |  | 76c Emekuku Street/Line, Port Harcourt, Rivers State                                                            | Port Harcourt | Rivers |
| 7194 | RV/0402 | RV/0402/S/1 | Atlantic Medical Center        |  | 76c Emekuku Street/Line, Port Harcourt, Rivers State                                                            | Port Harcourt | Rivers |
| 7195 | RV/0403 | RV/0403/S/1 | Spring Rose Hospital           |  | No.22 Rumuagbola Road Port Harcourt River State                                                                 | Obio/Akpor    | Rivers |
| 7196 | RV/0403 | RV/0403/S/5 | Spring Rose Hospital           |  | No.22 Rumuagbola Road Port Harcourt River State                                                                 | Obio/Akpor    | Rivers |
| 7197 | RV/0403 | RV/0403/S/2 | Spring Rose Hospital           |  | No.22 Rumuagbola Road Port Harcourt River State                                                                 | Obio/Akpor    | Rivers |
| 7198 | RV/0403 | RV/0403/S/4 | Spring Rose Hospital           |  | No.22 Rumuagbola Road Port Harcourt River State                                                                 | Obio/Akpor    | Rivers |
| 7199 | RV/0403 | RV/0403/S/6 | Spring Rose Hospital           |  | No.22 Rumuagbola Road Port Harcourt River State                                                                 | Obio/Akpor    | Rivers |
| 7200 | RV/0403 | RV/0403/S/3 | Spring Rose Hospital           |  | No.22 Rumuagbola Road Port Harcourt River State                                                                 | Obio/Akpor    | Rivers |
| 7201 | RV/0404 | RV/0404/S/3 | El-Joe Dam Hospital            |  | Off Shell Location Road, Mgbuoba, By Four Square Gospel Church Port Harcourt Rivers State                       | Obio/Akpor    | Rivers |
| 7202 | RV/0407 | RV/0407/S/1 | Life Forte Specialist Hospital |  | 3, Oluwosu Street, Off Ude Road Rumuollumeni, Port Harcourt Rivers State                                        | Obio/Akpor    | Rivers |
| 7203 | RV/0408 | RV/0408/S/2 | Hilton Clinics                 |  | No 2 Ejekwu Willie Close, Opp. Silver Spoon Hotel Ada George By Wimpey Road, Mile 4, Port Harcourt Rivers State | Obio/Akpor    | Rivers |
| 7204 | RV/0409 | RV/0409/S/5 | Pearl Clinics & Maternity      |  | 4, Manilla Pepple Street, D/Line, Port Harcourt River State                                                     | Obio/Akpor    | Rivers |
| 7205 | RV/0409 | RV/0409/S/3 | Pearl Clinics & Maternity      |  | 4, Manilla Pepple Street, D/Line, Port Harcourt River State                                                     | Obio/Akpor    | Rivers |
| 7206 | RV/0409 | RV/0409/S/1 | Pearl Clinics & Maternity      |  | 4, Manilla Pepple Street, D/Line, Port Harcourt River State                                                     | Obio/Akpor    | Rivers |
| 7207 | RV/0409 | RV/0409/S/2 | Pearl Clinics & Maternity      |  | 4, Manilla Pepple Street, D/Line, Port Harcourt River State                                                     | Obio/Akpor    | Rivers |
| 7208 | RV/0414 | RV/0414/S/3 | Health Wise Hospital           |  | No 3, Benin Street-Line Off 27 Aba Road By Oando Filling Station, Port Harcourt Rivers State                    | Port Harcourt | Rivers |

|      |         |              |                                  |  |                                                                                             |               |        |
|------|---------|--------------|----------------------------------|--|---------------------------------------------------------------------------------------------|---------------|--------|
| 7209 | RV/0414 | RV/0414/S/1  | Health Wise Hospital             |  | No 3,Benin Street-Line Off 27 Aba Road By Oando Filling Station, Port Harcourt Rivers State | Port Harcourt | Rivers |
| 7210 | RV/0414 | RV/0414/S/14 | Health Wise Hospital             |  | No 3,Benin Street-Line Off 27 Aba Road By Oando Filling Station, Port Harcourt Rivers State | Port Harcourt | Rivers |
| 7211 | RV/0414 | RV/0414/S/5  | Health Wise Hospital             |  | No 3,Benin Street-Line Off 27 Aba Road By Oando Filling Station, Port Harcourt Rivers State | Port Harcourt | Rivers |
| 7212 | RV/0416 | RV/0416/S/4  | AB Pharmaceuticals Nig Limited   |  | 48,Ada George Road, Port Harcourt Rivers State                                              | Obio/Akpor    | Rivers |
| 7213 | RV/0417 | RV/0417/S/13 | Lavinda Eye Specialist Hospital  |  | No 1, Omubo Close Off Cambell Avenue(By Sumitel Hotel) Off Peter Odili Road Rivers State    | Port Harcourt | Rivers |
| 7214 | RV/0419 | RV/0419/S/13 | Cynard Eye Clinic                |  | No 14,Trans-Woji/Slaughter Rd, Woji, Port Harcourt River State                              | Obio/Akpor    | Rivers |
| 7215 | RV/0422 | RV/0422/S/19 | Aggrey Clinic LTD (ANNEX)        |  | 3C Gorges Close, Nkpogu, Off Transamadi, Port Harcourt River State                          | Port Harcourt | Rivers |
| 7216 | RV/0423 | RV/0423/S/3  | Olivet Clinic                    |  | 18 Ede Street, Off Ogbunabali Street Port Harcourt Rivers State                             | Obio/Akpor    | Rivers |
| 7217 | RV/0423 | RV/0423/S/2  | Olivet Clinic                    |  | 18 Ede Street, Off Ogbunabali Street Port Harcourt Rivers State                             | Obio/Akpor    | Rivers |
| 7218 | RV/0425 | RV/0425/S/13 | Perfect Sight Eye Care Centre    |  | 80, Stadium Road Rumomasi Port Harcourt.                                                    | Obio/Akpor    | Rivers |
| 7219 | RV/0426 | RV/0426/S/13 | Perfect Sight Eye Care Centre    |  | 80, Stadium Road Rumomasi Port Harcourt.                                                    | Obio/Akpor    | Rivers |
| 7220 | RV/0428 | RV/0428/S/2  | Military Hospital Port-Harcourt  |  | Aba Road Port-Harcourt, Rivers state                                                        | Obio/Akpor    | Rivers |
| 7221 | RV/0428 | RV/0428/S/11 | Military Hospital Port-Harcourt  |  | Aba Road Port-Harcourt, Rivers state                                                        | Obio/Akpor    | Rivers |
| 7222 | RV/0428 | RV/0428/S/5  | Military Hospital Port-Harcourt  |  | Aba Road Port-Harcourt, Rivers state                                                        | Obio/Akpor    | Rivers |
| 7223 | RV/0428 | RV/0428/S/8  | Military Hospital Port-Harcourt  |  | Aba Road Port-Harcourt, Rivers state                                                        | Obio/Akpor    | Rivers |
| 7224 | RV/0428 | RV/0428/S/3  | Military Hospital Port-Harcourt  |  | Aba Road Port-Harcourt, Rivers state                                                        | Obio/Akpor    | Rivers |
| 7225 | RV/0428 | RV/0428/S/7  | Military Hospital Port-Harcourt  |  | Aba Road Port-Harcourt, Rivers state                                                        | Obio/Akpor    | Rivers |
| 7226 | RV/0428 | RV/0428/S/4  | Military Hospital Port-Harcourt  |  | Aba Road Port-Harcourt, Rivers state                                                        | Obio/Akpor    | Rivers |
| 7227 | RV/0428 | RV/0428/S/6  | Military Hospital Port-Harcourt  |  | Aba Road Port-Harcourt, Rivers state                                                        | Obio/Akpor    | Rivers |
| 7228 | RV/0428 | RV/0428/S/1  | Military Hospital Port-Harcourt  |  | Aba Road Port-Harcourt, Rivers state                                                        | Obio/Akpor    | Rivers |
| 7229 | RV/0430 | RV/0430/S/2  | Cova Care Ltd                    |  | 8, Main Street, Off Farm Road 2, Off G.U Ake Road, Eliozu. Rivers State                     | Obio/Akpor    | Rivers |
| 7230 | RV/0431 | RV/0431/S/1  | Sophike Medical Centre           |  | Plot 9, Road 7, Federal Housing Estate, Off Peter Odili Road, Ports-Harcourt. Rivers State  | Obio/Akpor    | Rivers |
| 7231 | RV/0431 | RV/0431/S/6  | Sophike Medical Centre           |  | Plot 9, Road 7, Federal Housing Estate, Off Peter Odili Road, Ports-Harcourt. Rivers State  | Obio/Akpor    | Rivers |
| 7232 | RV/0431 | RV/0431/S/2  | Sophike Medical Centre           |  | Plot 9, Road 7, Federal Housing Estate, Off Peter Odili Road, Ports-Harcourt. Rivers State  | Obio/Akpor    | Rivers |
| 7233 | RV/0431 | RV/0431/S/3  | Sophike Medical Centre           |  | Plot 9, Road 7, Federal Housing Estate, Off Peter Odili Road, Ports-Harcourt. Rivers State  | Obio/Akpor    | Rivers |
| 7234 | RV/0431 | RV/0431/S/14 | Sophike Medical Centre           |  | Plot 9, Road 7, Federal Housing Estate, Off Peter Odili Road, Ports-Harcourt. Rivers State  | Obio/Akpor    | Rivers |
| 7235 | RV/0431 | RV/0431/S/5  | Sophike Medical Centre           |  | Plot 9, Road 7, Federal Housing Estate, Off Peter Odili Road, Ports-Harcourt. Rivers State  | Obio/Akpor    | Rivers |
| 7236 | RV/0432 | RV/0432/S/13 | Vision Care Eye Clinic           |  | Plot 131/132 Stadium Road, Rumuomasi, Port- Harcourt. Rivers State                          | Obio/Akpor    | Rivers |
| 7237 | RV/0434 | RV/0434/S/1  | EII-Specialist Hospitals Limited |  | 7, Umuechem Street, D/Line, Port-Harcourt. Rivers State                                     | Obio/Akpor    | Rivers |

|      |         |              |                                       |  |                                                                                          |            |        |
|------|---------|--------------|---------------------------------------|--|------------------------------------------------------------------------------------------|------------|--------|
| 7238 | RV/0439 | RV/0439/S/2  | Nimley Clinic                         |  | 17, Churchill Road, Creek Road Extension, Port-Harcourt. Rivers State                    | Obio/Akpor | Rivers |
| 7239 | RV/0439 | RV/0439/S/3  | Nimley Clinic                         |  | 17, Churchill Road, Creek Road Extension, Port-Harcourt. Rivers State                    | Obio/Akpor | Rivers |
| 7240 | RV/0439 | RV/0439/S/1  | Nimley Clinic                         |  | 17, Churchill Road, Creek Road Extension, Port-Harcourt. Rivers State                    | Obio/Akpor | Rivers |
| 7241 | RV/0440 | RV/0440/S/6  | Bennod International Hospital Limited |  | 28 Ada George Road, Port-Harcourt -. Rivers State                                        | Obio/Akpor | Rivers |
| 7242 | RV/0440 | RV/0440/S/3  | Bennod International Hospital Limited |  | 28 Ada George Road, Port-Harcourt -. Rivers State                                        | Obio/Akpor | Rivers |
| 7243 | RV/0440 | RV/0440/S/1  | Bennod International Hospital Limited |  | 28 Ada George Road, Port-Harcourt -. Rivers State                                        | Obio/Akpor | Rivers |
| 7244 | RV/0440 | RV/0440/S/2  | Bennod International Hospital Limited |  | 28 Ada George Road, Port-Harcourt -. Rivers State                                        | Obio/Akpor | Rivers |
| 7245 | RV/0443 | RV/0443/S/19 | Magnum Nuvon Medical Centre Ltd       |  | 18, Canon Ndu Street, Elemenwo, Rivers State                                             | Obio/Akpor | Rivers |
| 7246 | RV/0444 | RV/0444/S/8  | Smile Evolution Dental Care           |  | 4, Amadi Ama Road, Trans-Amadi, Port-Harcourt. Rivers State.                             | Obio/Akpor | Rivers |
| 7247 | RV/0445 | RV/0445/S/13 | Morning Star Eyecare & Optical Clinic |  | 67, Rumuola Road, Opp Collage Of Arts & Science, Rumuola, Port- Harcourt. Rivers State   | Obio/Akpor | Rivers |
| 7248 | RV/0449 | RV/0449/S/19 | Obani Clinic                          |  | 77b Woji Road, GRA Phase 2, Port Harcourt, Rivers State                                  | Obio/Akpor | Rivers |
| 7249 | RV/0450 | RV/0450/S/15 | The Ophthalmic Specialist Company Ltd |  | 9, Evo Road, GRA Phase 2, Port-Harcourt, Rivers State                                    | Obio/Akpor | Rivers |
| 7250 | RV/0451 | RV/0451/S/2  | Abundant Health Specialist Ltd        |  | 9, Aleruchi Close, Off No.5 Ada George Road, Port-Harcourt Rivers State                  | Obio/Akpor | Rivers |
| 7251 | RV/0452 | RV/0452/S/3  | Greencare Medical Consultants Ltd     |  | 15, East West Worlu Road (Baba), Off Obiwali Road, Rumigbo, Port-Harcourt , Rivers State | Obio/Akpor | Rivers |
| 7252 | RV/0452 | RV/0452/S/1  | Greencare Medical Consultants Ltd     |  | 15, East West Worlu Road (Baba), Off Obiwali Road, Rumigbo, Port-Harcourt , Rivers State | Obio/Akpor | Rivers |
| 7253 | RV/0453 | RV/0453/S/3  | Save A Life Mission Hospital          |  | 38,Uyo St. Off Stadium Road, Rumuomasi, Port-Harcourt, Rivers State                      | Obio/Akpor | Rivers |
| 7254 | RV/0453 | RV/0453/S/5  | Save A Life Mission Hospital          |  | 38,Uyo St. Off Stadium Road, Rumuomasi, Port-Harcourt, Rivers State                      | Obio/Akpor | Rivers |
| 7255 | RV/0453 | RV/0453/S/4  | Save A Life Mission Hospital          |  | 38,Uyo St. Off Stadium Road, Rumuomasi, Port-Harcourt, Rivers State                      | Obio/Akpor | Rivers |
| 7256 | RV/0453 | RV/0453/S/1  | Save A Life Mission Hospital          |  | 38,Uyo St. Off Stadium Road, Rumuomasi, Port-Harcourt, Rivers State                      | Obio/Akpor | Rivers |
| 7257 | RV/0453 | RV/0453/S/2  | Save A Life Mission Hospital          |  | 38,Uyo St. Off Stadium Road, Rumuomasi, Port-Harcourt, Rivers State                      | Obio/Akpor | Rivers |
| 7258 | RV/0453 | RV/0453/S/6  | Save A Life Mission Hospital          |  | 38,Uyo St. Off Stadium Road, Rumuomasi, Port-Harcourt, Rivers State                      | Obio/Akpor | Rivers |
| 7259 | RV/0453 | RV/0453/S/7  | Save A Life Mission Hospital          |  | 38,Uyo St. Off Stadium Road, Rumuomasi, Port-Harcourt, Rivers State                      | Obio/Akpor | Rivers |
| 7260 | RV/0453 | RV/0453/S/13 | Save A Life Mission Hospital          |  | 38,Uyo St. Off Stadium Road, Rumuomasi, Port-Harcourt, Rivers State                      | Obio/Akpor | Rivers |
| 7261 | RV/0453 | RV/0453/S/14 | Save A Life Mission Hospital          |  | 38,Uyo St. Off Stadium Road, Rumuomasi, Port-Harcourt, Rivers State                      | Obio/Akpor | Rivers |
| 7262 | RV/0453 | RV/0453/S/15 | Save A Life Mission Hospital          |  | 38,Uyo St. Off Stadium Road, Rumuomasi, Port-Harcourt, Rivers State                      | Obio/Akpor | Rivers |
| 7263 | RV/0455 | RV/0455/S/13 | Josphinns Eye Clinic                  |  | 14,Kanna Street, D/Line, Port-Harcourt, Rivers State                                     | Obio/Akpor | Rivers |
| 7264 | RV/0456 | RV/0456/S/3  | Ofure Specialist Clinic               |  | Plot 65,Okporo Rd, Behind Eco bank, Off Artillery, Port-Harcourt, Rivers State           | Obio/Akpor | Rivers |
| 7265 | RV/0456 | RV/0456/S/2  | Ofure Specialist Clinic               |  | Plot 65,Okporo Rd, Behind Eco bank, Off Artillery, Port-Harcourt, Rivers State           | Obio/Akpor | Rivers |

|      |         |              |                                                 |  |                                                                                 |               |        |
|------|---------|--------------|-------------------------------------------------|--|---------------------------------------------------------------------------------|---------------|--------|
| 7266 | RV/0456 | RV/0456/S/1  | Ofure Specialist Clinic                         |  | Plot 65,Okporo Rd, Behind Eco bank, Off Artillery, Port-Harcourt, Rivers State  | Obio/Akpor    | Rivers |
| 7267 | RV/0456 | RV/0456/S/6  | Ofure Specialist Clinic                         |  | Plot 65,Okporo Rd, Behind Eco bank, Off Artillery, Port-Harcourt, Rivers State  | Obio/Akpor    | Rivers |
| 7268 | RV/0457 | RV/0457/S/2  | Westhill Medical Services Ltd                   |  | 4,Wogu Street ,Off Omoku Rd, D/Line Port-Harcourt Rivers State                  | Obio/Akpor    | Rivers |
| 7269 | RV/0461 | RV/0461/S/13 | Beracca Eye Clinic Ltd                          |  | 9,Rumuogba Estate, Rumuogba, Port-Harcourt ,Rivers State                        | Obio/Akpor    | Rivers |
| 7270 | RV/0462 | RV/0462/S/1  | Ultimate Specialist Clinic & Hospital           |  | 67,Royal Avenue, Off Odili/Okuru/Abuloma Link Road, Port-Harcourt, Rivers State | Port Harcourt | Rivers |
| 7271 | RV/0462 | RV/0462/S/6  | Ultimate Specialist Clinic & Hospital           |  | 67,Royal Avenue, Off Odili/Okuru/Abuloma Link Road, Port-Harcourt, Rivers State | Port Harcourt | Rivers |
| 7272 | RV/0462 | RV/0462/S/19 | Ultimate Specialist Clinic & Hospital           |  | 67,Royal Avenue, Off Odili/Okuru/Abuloma Link Road, Port-Harcourt, Rivers State | Port Harcourt | Rivers |
| 7273 | RV/0462 | RV/0462/S/3  | Ultimate Specialist Clinic & Hospital           |  | 67,Royal Avenue, Off Odili/Okuru/Abuloma Link Road, Port-Harcourt, Rivers State | Port Harcourt | Rivers |
| 7274 | RV/0463 | RV/0463/S/1  | Oak Endoscopy Centre                            |  | Plot 150, Rumuogba Estate, Port-Harcourt, Rivers State                          | Obio/Akpor    | Rivers |
| 7275 | RV/0463 | RV/0463/S/17 | Oak Endoscopy Centre                            |  | Plot 150, Rumuogba Estate, Port-Harcourt, Rivers State                          | Obio/Akpor    | Rivers |
| 7276 | RV/0464 | RV/0464/S/5  | International Trauma & Critical Care Centre Ltd |  | 11, Emenike Street, Mile One Port-Harcourt, Rivers State                        | Port Harcourt | Rivers |
| 7277 | RV/0464 | RV/0464/S/4  | International Trauma & Critical Care Centre Ltd |  | 11, Emenike Street, Mile One Port-Harcourt, Rivers State                        | Port Harcourt | Rivers |
| 7278 | RV/0464 | RV/0464/S/6  | International Trauma & Critical Care Centre Ltd |  | 11, Emenike Street, Mile One Port-Harcourt, Rivers State                        | Port Harcourt | Rivers |
| 7279 | RV/0464 | RV/0464/S/3  | International Trauma & Critical Care Centre Ltd |  | 11, Emenike Street, Mile One Port-Harcourt, Rivers State                        | Port Harcourt | Rivers |
| 7280 | RV/0464 | RV/0464/S/10 | International Trauma & Critical Care Centre Ltd |  | 11, Emenike Street, Mile One Port-Harcourt, Rivers State                        | Port Harcourt | Rivers |
| 7281 | RV/0464 | RV/0464/S/2  | International Trauma & Critical Care Centre Ltd |  | 11, Emenike Street, Mile One Port-Harcourt, Rivers State                        | Port Harcourt | Rivers |
| 7282 | RV/0464 | RV/0464/S/1  | International Trauma & Critical Care Centre Ltd |  | 11, Emenike Street, Mile One Port-Harcourt, Rivers State                        | Port Harcourt | Rivers |
| 7283 | RV/0465 | RV/0465/S/13 | Vonnie Vision Eye Care Consultants Ltd          |  | Close 8,Plot 2b Elekahia Housing Estate, Port-Harcourt, Rivers State            | Port Harcourt | Rivers |
| 7284 | RV/0466 | RV/0466/S/5  | NNPC Medical Services                           |  | NNPC-Eleme/Moscow Road, Port-Harcourt Rivers State                              | Tai           | Rivers |
| 7285 | RV/0466 | RV/0466/S/4  | NNPC Medical Services                           |  | NNPC-Eleme/Moscow Road, Port-Harcourt Rivers State                              | Tai           | Rivers |
| 7286 | RV/0466 | RV/0466/S/3  | NNPC Medical Services                           |  | NNPC-Eleme/Moscow Road, Port-Harcourt Rivers State                              | Tai           | Rivers |
| 7287 | RV/0466 | RV/0466/S/2  | NNPC Medical Services                           |  | NNPC-Eleme/Moscow Road, Port-Harcourt Rivers State                              | Tai           | Rivers |
| 7288 | RV/0466 | RV/0466/S/18 | NNPC Medical Services                           |  | NNPC-Eleme/Moscow Road, Port-Harcourt Rivers State                              | Tai           | Rivers |
| 7289 | RV/0466 | RV/0466/S/8  | NNPC Medical Services                           |  | NNPC-Eleme/Moscow Road, Port-Harcourt Rivers State                              | Tai           | Rivers |
| 7290 | RV/0466 | RV/0466/S/10 | NNPC Medical Services                           |  | NNPC-Eleme/Moscow Road, Port-Harcourt Rivers State                              | Tai           | Rivers |
| 7291 | RV/0466 | RV/0466/S/1  | NNPC Medical Services                           |  | NNPC-Eleme/Moscow Road, Port-Harcourt Rivers State                              | Tai           | Rivers |
| 7292 | RV/0466 | RV/0466/S/11 | NNPC Medical Services                           |  | NNPC-Eleme/Moscow Road, Port-Harcourt Rivers State                              | Tai           | Rivers |
| 7293 | RV/0466 | RV/0466/S/13 | NNPC Medical Services                           |  | NNPC-Eleme/Moscow Road, Port-Harcourt Rivers State                              | Tai           | Rivers |

|      |         |              |                                                   |                         |                                                       |              |        |
|------|---------|--------------|---------------------------------------------------|-------------------------|-------------------------------------------------------|--------------|--------|
| 7294 | RV/0466 | RV/0466/S/14 | NNPC Medical Services                             |                         | NNPC-Eleme/Moscow Road,<br>Port-Harcourt Rivers State | Tai          | Rivers |
| 7295 | RV/0466 | RV/0466/S/9  | NNPC Medical Services                             |                         | NNPC-Eleme/Moscow Road,<br>Port-Harcourt Rivers State | Tai          | Rivers |
| 7296 | RV/0466 | RV/0466/S/6  | NNPC Medical Services                             |                         | NNPC-Eleme/Moscow Road,<br>Port-Harcourt Rivers State | Tai          | Rivers |
| 7297 | SO/0001 | SO/0001/S/9  | Federal<br>Neurophychiatric<br>Hospital           | Neuropsychiatry         | Kware, Sokoto                                         | Kware        | Sokoto |
| 7298 | SO/0002 | SO/0002/S/3  | Sokoto Clinic                                     |                         | Sokoto                                                | Sokoto South | Sokoto |
| 7299 | SO/0004 | SO/0004/S/12 | Shepherd Specialist<br>Clinic                     |                         | No. 32 Zaria Rd. Ung. Rogo<br>Area                    | Sokoto South | Sokoto |
| 7300 | SO/0005 | SO/0005/S/3  | Sahel Specialist<br>Hospital                      |                         | Sultan Abubakar Rd. Sokoto                            | Sokoto South | Sokoto |
| 7301 | SO/0006 | SO/0006/S/3  | Specialist Hospital                               |                         | Abdullahi Fodiyo Road,<br>Sokoto                      | Sokoto South | Sokoto |
| 7302 | SO/0006 | SO/0006/S/15 | Specialist Hospital                               |                         | Abdullahi Fodiyo Road,<br>Sokoto                      | Sokoto South | Sokoto |
| 7303 | SO/0006 | SO/0006/S/8  | Specialist Hospital                               |                         | Abdullahi Fodiyo Road,<br>Sokoto                      | Sokoto South | Sokoto |
| 7304 | SO/0006 | SO/0006/S/1  | Specialist Hospital                               |                         | Abdullahi Fodiyo Road,<br>Sokoto                      | Sokoto South | Sokoto |
| 7305 | SO/0006 | SO/0006/S/12 | Specialist Hospital                               |                         | Abdullahi Fodiyo Road,<br>Sokoto                      | Sokoto South | Sokoto |
| 7306 | SO/0006 | SO/0006/S/5  | Specialist Hospital                               |                         | Abdullahi Fodiyo Road,<br>Sokoto                      | Sokoto South | Sokoto |
| 7307 | SO/0006 | SO/0006/S/2  | Specialist Hospital                               |                         | Abdullahi Fodiyo Road,<br>Sokoto                      | Sokoto South | Sokoto |
| 7308 | SO/0006 | SO/0006/S/4  | Specialist Hospital                               |                         | Abdullahi Fodiyo Road,<br>Sokoto                      | Sokoto South | Sokoto |
| 7309 | SO/0009 | SO/0009/S/5  | Karaye Hospital                                   |                         | Ali Akilu Rd. Sokoto                                  | Sokoto South | Sokoto |
| 7310 | SO/0010 | SO/0010/S/3  | Usman Danfodio<br>University Teaching<br>Hospital |                         | Behind Standard Trust Bank,<br>Kano Rd. Sokoto        | Sokoto South | Sokoto |
| 7311 | SO/0010 | SO/0010/S/11 | Usman Danfodio<br>University Teaching<br>Hospital |                         | Behind Standard Trust Bank,<br>Kano Rd. Sokoto        | Sokoto South | Sokoto |
| 7312 | SO/0010 | SO/0010/S/8  | Usman Danfodio<br>University Teaching<br>Hospital |                         | Behind Standard Trust Bank,<br>Kano Rd. Sokoto        | Sokoto South | Sokoto |
| 7313 | SO/0010 | SO/0010/S/5  | Usman Danfodio<br>University Teaching<br>Hospital |                         | Behind Standard Trust Bank,<br>Kano Rd. Sokoto        | Sokoto South | Sokoto |
| 7314 | SO/0010 | SO/0010/S/4  | Usman Danfodio<br>University Teaching<br>Hospital |                         | Behind Standard Trust Bank,<br>Kano Rd. Sokoto        | Sokoto South | Sokoto |
| 7315 | SO/0010 | SO/0010/S/7  | Usman Danfodio<br>University Teaching<br>Hospital |                         | Behind Standard Trust Bank,<br>Kano Rd. Sokoto        | Sokoto South | Sokoto |
| 7316 | SO/0010 | SO/0010/S/12 | Usman Danfodio<br>University Teaching<br>Hospital |                         | Behind Standard Trust Bank,<br>Kano Rd. Sokoto        | Sokoto South | Sokoto |
| 7317 | SO/0010 | SO/0010/S/15 | Usman Danfodio<br>University Teaching<br>Hospital |                         | Behind Standard Trust Bank,<br>Kano Rd. Sokoto        | Sokoto South | Sokoto |
| 7318 | SO/0010 | SO/0010/S/6  | Usman Danfodio<br>University Teaching<br>Hospital |                         | Behind Standard Trust Bank,<br>Kano Rd. Sokoto        | Sokoto South | Sokoto |
| 7319 | SO/0010 | SO/0010/S/2  | Usman Danfodio<br>University Teaching<br>Hospital |                         | Behind Standard Trust Bank,<br>Kano Rd. Sokoto        | Sokoto South | Sokoto |
| 7320 | SO/0010 | SO/0010/S/1  | Usman Danfodio<br>University Teaching<br>Hospital |                         | Behind Standard Trust Bank,<br>Kano Rd. Sokoto        | Sokoto South | Sokoto |
| 7321 | SO/0011 | SO/0011/S/3  | Al-Fijir Specialist<br>Medical Center             | -                       | No. 32 Zaria Road, Unguwan<br>Rogo Area               | Sokoto South | Sokoto |
| 7322 | SO/0013 | SO/0013/S/4  | Primecare<br>Pharmaceuticals                      | Pharmacy                | 15A, Kano Road, Sokoto                                | Sokoto South | Sokoto |
| 7323 | SO/0018 | SO/0018/S/4  | French-Afrique<br>Pharmacy                        | Pharmacy                | Plot 3 Western By Pass RD<br>Sokoto                   | Wamakko      | Sokoto |
| 7324 | SO/0019 | SO/0019/S/4  | Inland Pharmacy                                   | Pharmacy                | 10, Maiduguri Road                                    | Sokoto South | Sokoto |
| 7325 | SO/0020 | SO/0020/S/4  | Binji Pharmacy                                    | Pharmacy                | Gwiwa Low Cost Housing,<br>Kaduna Rd.                 | Wamakko      | Sokoto |
| 7326 | SO/0021 | SO/0021/S/4  | Freedom Pharmacy                                  | Pharmacy                | 29, Sultan Abubakar Rd.                               | Sokoto South | Sokoto |
| 7327 | SO/0022 | SO/0022/S/4  | Wisdom Kings Pharm.                               | Pharmacy                | No. 114 Ahmadu Bello Way                              | Sokoto South | Sokoto |
| 7328 | SO/0023 | SO/0023/S/4  | Freedom Pharmacy                                  | Pharmacy                | No. 9 Kano Rd                                         | Sokoto South | Sokoto |
| 7329 | SO/0024 | SO/0024/S/4  | Passmark Gold<br>Pharmacy                         | Pharmacy                | No. 36 Aliyu Jodi Rd.                                 | Sokoto South | Sokoto |
| 7330 | SO/0025 | SO/0025/S/4  | Kaycee Pharmacy                                   | Pharmacy                | 16, Aliyu Jodi Rd.                                    | Sokoto South | Sokoto |
| 7331 | SO/0026 | SO/0026/S/4  | Maigobir Pharamcy                                 | Pharmacy                | No. 29 Alh. Halima Estate,<br>Kilgoria Rd             | Sokoto South | Sokoto |
| 7332 | SO/0028 | SO/0028/S/3  | Sokoto Clinic                                     | O & G, Gen.<br>Medicine | Sokoto                                                | Sokoto North | Sokoto |
| 7333 | SO/0033 | SO/0033/S/1  | Free Hand Specialist<br>Hospital                  |                         | 31, Shuni Rd, Sokoto                                  | Sokoto North | Sokoto |



|      |         |              |                                    |  |                                                                      |              |        |
|------|---------|--------------|------------------------------------|--|----------------------------------------------------------------------|--------------|--------|
| 7334 | SO/0072 | SO/0072/S/3  | An-Nisha Clinic                    |  | 2, Garba Mohammed Rd, opp School of Works, Runjin Sabo, Sokoto       | Sokoto North | Sokoto |
| 7335 | SO/0073 | SO/0073/S/3  | Ubandoma Soecialist Clinic         |  | # 24, Besse Road, Rujin Sambo Area, Sokoto                           | Sokoto North | Sokoto |
| 7336 | SO/0075 | SO/0075/S/15 | State Specialist Hospital          |  | Sultan Abubakar Road, Sokoto, Sokoto State                           | Sokoto South | Sokoto |
| 7337 | SO/0075 | SO/0075/S/6  | State Specialist Hospital          |  | Sultan Abubakar Road, Sokoto, Sokoto State                           | Sokoto South | Sokoto |
| 7338 | SO/0075 | SO/0075/S/5  | State Specialist Hospital          |  | Sultan Abubakar Road, Sokoto, Sokoto State                           | Sokoto South | Sokoto |
| 7339 | SO/0075 | SO/0075/S/2  | State Specialist Hospital          |  | Sultan Abubakar Road, Sokoto, Sokoto State                           | Sokoto South | Sokoto |
| 7340 | SO/0075 | SO/0075/S/12 | State Specialist Hospital          |  | Sultan Abubakar Road, Sokoto, Sokoto State                           | Sokoto South | Sokoto |
| 7341 | SO/0075 | SO/0075/S/8  | State Specialist Hospital          |  | Sultan Abubakar Road, Sokoto, Sokoto State                           | Sokoto South | Sokoto |
| 7342 | SO/0075 | SO/0075/S/7  | State Specialist Hospital          |  | Sultan Abubakar Road, Sokoto, Sokoto State                           | Sokoto South | Sokoto |
| 7343 | SO/0075 | SO/0075/S/3  | State Specialist Hospital          |  | Sultan Abubakar Road, Sokoto, Sokoto State                           | Sokoto South | Sokoto |
| 7344 | SO/0075 | SO/0075/S/1  | State Specialist Hospital          |  | Sultan Abubakar Road, Sokoto, Sokoto State                           | Sokoto South | Sokoto |
| 7345 | SO/0075 | SO/0075/S/4  | State Specialist Hospital          |  | Sultan Abubakar Road, Sokoto, Sokoto State                           | Sokoto South | Sokoto |
| 7346 | SO/0076 | SO/0076/S/10 | Bone And Joint Orthopedic Hospital |  | 2 Besse Road Rijin Sambo, Sokoto State.                              | Sokoto North | Sokoto |
| 7347 | SO/0077 | SO/0077/S/3  | Zefafi Women Specialist Hospital   |  | No. 1 Maikahon Karo Road Beside Giginya Stadium Sokoto, Sokoto State | Sokoto South | Sokoto |
| 7348 | SO/0080 | SO/0080/S/6  | Caliphate Multispecialty Hospital  |  | No. 2 Nagwamatse Road, Sokoto, Sokoto State.                         | Sokoto South | Sokoto |
| 7349 | SO/0080 | SO/0080/S/3  | Caliphate Multispecialty Hospital  |  | No. 2 Nagwamatse Road, Sokoto, Sokoto State.                         | Sokoto South | Sokoto |
| 7350 | SO/0080 | SO/0080/S/1  | Caliphate Multispecialty Hospital  |  | No. 2 Nagwamatse Road, Sokoto, Sokoto State.                         | Sokoto South | Sokoto |
| 7351 | SO/0080 | SO/0080/S/14 | Caliphate Multispecialty Hospital  |  | No. 2 Nagwamatse Road, Sokoto, Sokoto State.                         | Sokoto South | Sokoto |
| 7352 | SO/0080 | SO/0080/S/2  | Caliphate Multispecialty Hospital  |  | No. 2 Nagwamatse Road, Sokoto, Sokoto State.                         | Sokoto South | Sokoto |
| 7353 | SO/0080 | SO/0080/S/7  | Caliphate Multispecialty Hospital  |  | No. 2 Nagwamatse Road, Sokoto, Sokoto State.                         | Sokoto South | Sokoto |
| 7354 | SO/0081 | SO/0081/S/7  | Medistop Clinical Diagnostic       |  | No. 7 Dange Road Mabera, Sokoto, Sokoto State                        | Sokoto South | Sokoto |
| 7355 | SO/0081 | SO/0081/S/5  | Medistop Clinical Diagnostic       |  | No. 7 Dange Road Mabera, Sokoto, Sokoto State                        | Sokoto South | Sokoto |
| 7356 | TR/0001 | TR/0001/S/3  | Jinya Medical Centre               |  | 3c Gombe Road, Jalingo                                               | Jalingo      | Taraba |
| 7357 | TR/0001 | TR/0001/S/1  | Jinya Medical Centre               |  | 3c Gombe Road, Jalingo                                               | Jalingo      | Taraba |
| 7358 | TR/0001 | TR/0001/S/2  | Jinya Medical Centre               |  | 3c Gombe Road, Jalingo                                               | Jalingo      | Taraba |
| 7359 | TR/0001 | TR/0001/S/5  | Jinya Medical Centre               |  | 3c Gombe Road, Jalingo                                               | Jalingo      | Taraba |
| 7360 | TR/0005 | TR/0005/S/3  | Gateway Hospital                   |  | No. 3c Gombi Road, Near State Low Cost, Jalingo                      | Jalingo      | Taraba |
| 7361 | TR/0005 | TR/0005/S/6  | Gateway Hospital                   |  | No. 3c Gombi Road, Near State Low Cost, Jalingo                      | Jalingo      | Taraba |
| 7362 | TR/0005 | TR/0005/S/5  | Gateway Hospital                   |  | No. 3c Gombi Road, Near State Low Cost, Jalingo                      | Jalingo      | Taraba |
| 7363 | TR/0005 | TR/0005/S/2  | Gateway Hospital                   |  | No. 3c Gombi Road, Near State Low Cost, Jalingo                      | Jalingo      | Taraba |
| 7364 | TR/0005 | TR/0005/S/1  | Gateway Hospital                   |  | No. 3c Gombi Road, Near State Low Cost, Jalingo                      | Jalingo      | Taraba |
| 7365 | TR/0009 | TR/0009/S/11 | Federal Medical Centre - Jalingo   |  | No. 29 Idris Makeri Street, Jalingo                                  | Jalingo      | Taraba |
| 7366 | TR/0009 | TR/0009/S/2  | Federal Medical Centre - Jalingo   |  | No. 29 Idris Makeri Street, Jalingo                                  | Jalingo      | Taraba |
| 7367 | TR/0009 | TR/0009/S/6  | Federal Medical Centre - Jalingo   |  | No. 29 Idris Makeri Street, Jalingo                                  | Jalingo      | Taraba |
| 7368 | TR/0009 | TR/0009/S/9  | Federal Medical Centre - Jalingo   |  | No. 29 Idris Makeri Street, Jalingo                                  | Jalingo      | Taraba |
| 7369 | TR/0009 | TR/0009/S/7  | Federal Medical Centre - Jalingo   |  | No. 29 Idris Makeri Street, Jalingo                                  | Jalingo      | Taraba |
| 7370 | TR/0009 | TR/0009/S/3  | Federal Medical Centre - Jalingo   |  | No. 29 Idris Makeri Street, Jalingo                                  | Jalingo      | Taraba |
| 7371 | TR/0009 | TR/0009/S/1  | Federal Medical Centre - Jalingo   |  | No. 29 Idris Makeri Street, Jalingo                                  | Jalingo      | Taraba |
| 7372 | TR/0009 | TR/0009/S/15 | Federal Medical Centre - Jalingo   |  | No. 29 Idris Makeri Street, Jalingo                                  | Jalingo      | Taraba |

|      |         |              |                                   |  |                                                                    |          |        |
|------|---------|--------------|-----------------------------------|--|--------------------------------------------------------------------|----------|--------|
| 7373 | TR/0009 | TR/0009/S/10 | Federal Medical Centre - Jalingo  |  | No. 29 Idris Makeri Street, Jalingo                                | Jalingo  | Taraba |
| 7374 | TR/0009 | TR/0009/S/4  | Federal Medical Centre - Jalingo  |  | No. 29 Idris Makeri Street, Jalingo                                | Jalingo  | Taraba |
| 7375 | TR/0009 | TR/0009/S/5  | Federal Medical Centre - Jalingo  |  | No. 29 Idris Makeri Street, Jalingo                                | Jalingo  | Taraba |
| 7376 | TR/0013 | TR/0013/S/5  | General Hospital, Zing            |  | Bitaka Road, Zing                                                  | Zing     | Taraba |
| 7377 | TR/0013 | TR/0013/S/1  | General Hospital, Zing            |  | Bitaka Road, Zing                                                  | Zing     | Taraba |
| 7378 | TR/0013 | TR/0013/S/4  | General Hospital, Zing            |  | Bitaka Road, Zing                                                  | Zing     | Taraba |
| 7379 | TR/0028 | TR/0028/S/5  | Jonas clinics & Maternity         |  | No 1, Old Garage Round-about, Takum                                | Takum    | Taraba |
| 7380 | TR/0029 | TR/0029/S/5  | Niger Clinic                      |  | Opp water Board, Yakum                                             | Takum    | Taraba |
| 7381 | TR/0038 | TR/0038/S/4  | General Hospital, Gembu           |  | Gembu, Taraba State                                                | Sardauna | Taraba |
| 7382 | TR/0038 | TR/0038/S/5  | General Hospital, Gembu           |  | Gembu, Taraba State                                                | Sardauna | Taraba |
| 7383 | TR/0043 | TR/0043/S/5  | Kwararafa Hospital & Maternity    |  | 8, After Zion Church, Along Air Strip, Wukari                      | Wukari   | Taraba |
| 7384 | TR/0044 | TR/0044/S/14 | Danny's Wellness Clinics Ltd      |  | Presidential Lodge Area, Specialist Hospital Road, Jalingo         | Jalingo  | Taraba |
| 7385 | TR/0044 | TR/0044/S/5  | Danny's Wellness Clinics Ltd      |  | Presidential Lodge Area, Specialist Hospital Road, Jalingo         | Jalingo  | Taraba |
| 7386 | TR/0045 | TR/0045/S/2  | Taraba Specialist Hospital        |  | 1, Jolly Nyame Way, Off Bypass, Jalingo Taraba state               | Jalingo  | Taraba |
| 7387 | TR/0045 | TR/0045/S/7  | Taraba Specialist Hospital        |  | 1, Jolly Nyame Way, Off Bypass, Jalingo Taraba state               | Jalingo  | Taraba |
| 7388 | TR/0045 | TR/0045/S/10 | Taraba Specialist Hospital        |  | 1, Jolly Nyame Way, Off Bypass, Jalingo Taraba state               | Jalingo  | Taraba |
| 7389 | TR/0045 | TR/0045/S/6  | Taraba Specialist Hospital        |  | 1, Jolly Nyame Way, Off Bypass, Jalingo Taraba state               | Jalingo  | Taraba |
| 7390 | TR/0045 | TR/0045/S/4  | Taraba Specialist Hospital        |  | 1, Jolly Nyame Way, Off Bypass, Jalingo Taraba state               | Jalingo  | Taraba |
| 7391 | TR/0045 | TR/0045/S/5  | Taraba Specialist Hospital        |  | 1, Jolly Nyame Way, Off Bypass, Jalingo Taraba state               | Jalingo  | Taraba |
| 7392 | TR/0045 | TR/0045/S/14 | Taraba Specialist Hospital        |  | 1, Jolly Nyame Way, Off Bypass, Jalingo Taraba state               | Jalingo  | Taraba |
| 7393 | TR/0045 | TR/0045/S/3  | Taraba Specialist Hospital        |  | 1, Jolly Nyame Way, Off Bypass, Jalingo Taraba state               | Jalingo  | Taraba |
| 7394 | TR/0045 | TR/0045/S/1  | Taraba Specialist Hospital        |  | 1, Jolly Nyame Way, Off Bypass, Jalingo Taraba state               | Jalingo  | Taraba |
| 7395 | TR/0046 | TR/0046/S/14 | Sauki Hospital & Maternity        |  | NO. 8, Near Zion Baptist Church Sabon Gari, Jalingo, Taraba State. | Jalingo  | Taraba |
| 7396 | TR/0047 | TR/0047/S/1  | First Referral Hospital.          |  | Serti Taraba State                                                 | Gashaka  | Taraba |
| 7397 | TR/0048 | TR/0048/S/4  | University Health Services Centre |  | Federal University Wukari, Taraba State                            | Wukari   | Taraba |
| 7398 | TR/0048 | TR/0048/S/5  | University Health Services Centre |  | Federal University Wukari, Taraba State                            | Wukari   | Taraba |
| 7399 | TR/0049 | TR/0049/S/3  | First Nasarawo Hospital           |  | Sintali B Jalingo                                                  | Jalingo  | Taraba |
| 7400 | TR/0049 | TR/0049/S/1  | First Nasarawo Hospital           |  | Sintali B Jalingo                                                  | Jalingo  | Taraba |
| 7401 | TR/0050 | TR/0050/S/14 | Kwenas Clinic & Maternity         |  | Near Old Garage, Wukari                                            | Wukari   | Taraba |
| 7402 | TR/0055 | TR/0055/S/5  | Waritoma - Rahila Hospital        |  | Opp. Shagari Low Cost, Along Takum Road, Wukari Taraba State       | Wukari   | Taraba |
| 7403 | TR/0055 | TR/0055/S/1  | Waritoma - Rahila Hospital        |  | Opp. Shagari Low Cost, Along Takum Road, Wukari Taraba State       | Wukari   | Taraba |
| 7404 | TR/0055 | TR/0055/S/3  | Waritoma - Rahila Hospital        |  | Opp. Shagari Low Cost, Along Takum Road, Wukari Taraba State       | Wukari   | Taraba |
| 7405 | TR/0056 | TR/0056/S/4  | Goggoji Memorial Clinic           |  | Behind Federal Science T. College Jalingo, Taraba State            | Jalingo  | Taraba |
| 7406 | TR/0056 | TR/0056/S/5  | Goggoji Memorial Clinic           |  | Behind Federal Science T. College Jalingo, Taraba State            | Jalingo  | Taraba |
| 7407 | TR/0058 | TR/0058/S/5  | General Hospital Takum            |  | Takum, Taraba State                                                | Takum    | Taraba |
| 7408 | TR/0058 | TR/0058/S/4  | General Hospital Takum            |  | Takum, Taraba State                                                | Takum    | Taraba |

|      |         |              |                                         |  |                                                        |          |        |
|------|---------|--------------|-----------------------------------------|--|--------------------------------------------------------|----------|--------|
| 7409 | TR/0059 | TR/0059/S/5  | Zahra Clinic                            |  | Adjacent Mastala Adamawa Street Jalingo, Taraba State. | Jalingo  | Taraba |
| 7410 | TR/0059 | TR/0059/S/4  | Zahra Clinic                            |  | Adjacent Mastala Adamawa Street Jalingo, Taraba State. | Jalingo  | Taraba |
| 7411 | YB/0002 | YB/0002/S/4  | General Hospital, Gashua                |  | Gashua, Along Nguru Rd., Gashua                        | Bade     | Yobe   |
| 7412 | YB/0002 | YB/0002/S/5  | General Hospital, Gashua                |  | Gashua, Along Nguru Rd., Gashua                        | Bade     | Yobe   |
| 7413 | YB/0004 | YB/0004/S/11 | General Sani Abacha Specialist Hospital |  | Along Gujba Rd., Damaturu                              | Damaturu | Yobe   |
| 7414 | YB/0004 | YB/0004/S/2  | General Sani Abacha Specialist Hospital |  | Along Gujba Rd., Damaturu                              | Damaturu | Yobe   |
| 7415 | YB/0004 | YB/0004/S/3  | General Sani Abacha Specialist Hospital |  | Along Gujba Rd., Damaturu                              | Damaturu | Yobe   |
| 7416 | YB/0004 | YB/0004/S/8  | General Sani Abacha Specialist Hospital |  | Along Gujba Rd., Damaturu                              | Damaturu | Yobe   |
| 7417 | YB/0004 | YB/0004/S/7  | General Sani Abacha Specialist Hospital |  | Along Gujba Rd., Damaturu                              | Damaturu | Yobe   |
| 7418 | YB/0004 | YB/0004/S/15 | General Sani Abacha Specialist Hospital |  | Along Gujba Rd., Damaturu                              | Damaturu | Yobe   |
| 7419 | YB/0004 | YB/0004/S/6  | General Sani Abacha Specialist Hospital |  | Along Gujba Rd., Damaturu                              | Damaturu | Yobe   |
| 7420 | YB/0004 | YB/0004/S/1  | General Sani Abacha Specialist Hospital |  | Along Gujba Rd., Damaturu                              | Damaturu | Yobe   |
| 7421 | YB/0004 | YB/0004/S/5  | General Sani Abacha Specialist Hospital |  | Along Gujba Rd., Damaturu                              | Damaturu | Yobe   |
| 7422 | YB/0004 | YB/0004/S/4  | General Sani Abacha Specialist Hospital |  | Along Gujba Rd., Damaturu                              | Damaturu | Yobe   |
| 7423 | YB/0007 | YB/0007/S/5  | Dr(Mrs) Maryam Abacha Fsp               |  | Gashua Rd., Damaturu                                   | Damaturu | Yobe   |
| 7424 | YB/0016 | YB/0016/S/4  | General Hospital Buni-Yadi              |  | Along Biu Road, Buni-Yadi                              | Gujba    | Yobe   |
| 7425 | YB/0017 | YB/0017/S/7  | Federal Medical Center, Nguru           |  | Along Gashua Rd.                                       | Nguru    | Yobe   |
| 7426 | YB/0017 | YB/0017/S/10 | Federal Medical Center, Nguru           |  | Along Gashua Rd.                                       | Nguru    | Yobe   |
| 7427 | YB/0017 | YB/0017/S/15 | Federal Medical Center, Nguru           |  | Along Gashua Rd.                                       | Nguru    | Yobe   |
| 7428 | YB/0017 | YB/0017/S/5  | Federal Medical Center, Nguru           |  | Along Gashua Rd.                                       | Nguru    | Yobe   |
| 7429 | YB/0017 | YB/0017/S/2  | Federal Medical Center, Nguru           |  | Along Gashua Rd.                                       | Nguru    | Yobe   |
| 7430 | YB/0017 | YB/0017/S/6  | Federal Medical Center, Nguru           |  | Along Gashua Rd.                                       | Nguru    | Yobe   |
| 7431 | YB/0017 | YB/0017/S/3  | Federal Medical Center, Nguru           |  | Along Gashua Rd.                                       | Nguru    | Yobe   |
| 7432 | YB/0017 | YB/0017/S/11 | Federal Medical Center, Nguru           |  | Along Gashua Rd.                                       | Nguru    | Yobe   |
| 7433 | YB/0017 | YB/0017/S/8  | Federal Medical Center, Nguru           |  | Along Gashua Rd.                                       | Nguru    | Yobe   |
| 7434 | YB/0017 | YB/0017/S/1  | Federal Medical Center, Nguru           |  | Along Gashua Rd.                                       | Nguru    | Yobe   |
| 7435 | YB/0017 | YB/0017/S/12 | Federal Medical Center, Nguru           |  | Along Gashua Rd.                                       | Nguru    | Yobe   |
| 7436 | YB/0017 | YB/0017/S/4  | Federal Medical Center, Nguru           |  | Along Gashua Rd.                                       | Nguru    | Yobe   |
| 7437 | YB/0019 | YB/0019/S/3  | General Hospital Potiskum               |  | Along Hospital Road                                    | Potiskum | Yobe   |
| 7438 | YB/0019 | YB/0019/S/6  | General Hospital Potiskum               |  | Along Hospital Road                                    | Potiskum | Yobe   |
| 7439 | YB/0019 | YB/0019/S/2  | General Hospital Potiskum               |  | Along Hospital Road                                    | Potiskum | Yobe   |
| 7440 | YB/0019 | YB/0019/S/10 | General Hospital Potiskum               |  | Along Hospital Road                                    | Potiskum | Yobe   |
| 7441 | YB/0019 | YB/0019/S/8  | General Hospital Potiskum               |  | Along Hospital Road                                    | Potiskum | Yobe   |
| 7442 | YB/0019 | YB/0019/S/4  | General Hospital Potiskum               |  | Along Hospital Road                                    | Potiskum | Yobe   |
| 7443 | YB/0019 | YB/0019/S/5  | General Hospital Potiskum               |  | Along Hospital Road                                    | Potiskum | Yobe   |
| 7444 | YB/0019 | YB/0019/S/1  | General Hospital Potiskum               |  | Along Hospital Road                                    | Potiskum | Yobe   |
| 7445 | YB/0020 | YB/0020/S/7  | Ajiko Medical Center                    |  | Along Gashua Rd                                        | Damaturu | Yobe   |
| 7446 | YB/0020 | YB/0020/S/4  | Ajiko Medical Center                    |  | Along Gashua Rd                                        | Damaturu | Yobe   |
| 7447 | YB/0020 | YB/0020/S/5  | Ajiko Medical Center                    |  | Along Gashua Rd                                        | Damaturu | Yobe   |
| 7448 | YB/0021 | YB/0021/S/4  | General Hospital, Geidam                |  | Kaigama Road, Geidam                                   | Geidam   | Yobe   |
| 7449 | YB/0021 | YB/0021/S/5  | General Hospital, Geidam                |  | Kaigama Road, Geidam                                   | Geidam   | Yobe   |
| 7450 | YB/0022 | YB/0022/S/14 | Potiskum Medical Clinic                 |  | No. 166 Mohammed Idriss Way, Potiskum                  | Geidam   | Yobe   |
| 7451 | YB/0022 | YB/0022/S/3  | Potiskum Medical Clinic                 |  | No. 166 Mohammed Idriss Way, Potiskum                  | Geidam   | Yobe   |
| 7452 | YB/0022 | YB/0022/S/1  | Potiskum Medical Clinic                 |  | No. 166 Mohammed Idriss Way, Potiskum                  | Geidam   | Yobe   |

|      |         |              |                                      |            |                                                    |          |         |
|------|---------|--------------|--------------------------------------|------------|----------------------------------------------------|----------|---------|
| 7453 | YB/0040 | YB/0040/S/7  | City Medical Centre                  |            | Zango Ward, Damaturu                               | Damaturu | Yobe    |
| 7454 | YB/0040 | YB/0040/S/5  | City Medical Centre                  |            | Zango Ward, Damaturu                               | Damaturu | Yobe    |
| 7455 | ZF/0003 | ZF/0003/S/5  | Freedom Diag. Lab. Centre            | Laboratory | Kauran Namoda Road, T/Wada, Gusau                  | Gusau    | Zamfara |
| 7456 | ZF/0005 | ZF/0005/S/1  | Gusau General Hospital - Gusau       |            | Mortage Area, Gusau                                | Gusau    | Zamfara |
| 7457 | ZF/0005 | ZF/0005/S/6  | Gusau General Hospital - Gusau       |            | Mortage Area, Gusau                                | Gusau    | Zamfara |
| 7458 | ZF/0005 | ZF/0005/S/5  | Gusau General Hospital - Gusau       |            | Mortage Area, Gusau                                | Gusau    | Zamfara |
| 7459 | ZF/0005 | ZF/0005/S/4  | Gusau General Hospital - Gusau       |            | Mortage Area, Gusau                                | Gusau    | Zamfara |
| 7460 | ZF/0005 | ZF/0005/S/14 | Gusau General Hospital - Gusau       |            | Mortage Area, Gusau                                | Gusau    | Zamfara |
| 7461 | ZF/0005 | ZF/0005/S/3  | Gusau General Hospital - Gusau       |            | Mortage Area, Gusau                                | Gusau    | Zamfara |
| 7462 | ZF/0007 | ZF/0007/S/3  | Women & Children Specialist Hospital |            | Gusau                                              | Gusau    | Zamfara |
| 7463 | ZF/0007 | ZF/0007/S/14 | Women & Children Specialist Hospital |            | Gusau                                              | Gusau    | Zamfara |
| 7464 | ZF/0007 | ZF/0007/S/5  | Women & Children Specialist Hospital |            | Gusau                                              | Gusau    | Zamfara |
| 7465 | ZF/0007 | ZF/0007/S/4  | Women & Children Specialist Hospital |            | Gusau                                              | Gusau    | Zamfara |
| 7466 | ZF/0007 | ZF/0007/S/1  | Women & Children Specialist Hospital |            | Gusau                                              | Gusau    | Zamfara |
| 7467 | ZF/0013 | ZF/0013/S/4  | Datura Pharmacy Ltd.,                | Pharmacy   | No.11 K/Namoda Road, Tudun Wada, Gusau             | Gusau    | Zamfara |
| 7468 | ZF/0014 | ZF/0014/S/4  | Vinna Pharmacy Ltd.                  | Pharmacy   | 43, K/Namoda Road, T/Wada, Gusau                   | Gusau    | Zamfara |
| 7469 | ZF/0015 | ZF/0015/S/4  | Ernest Dof Pharmacy Ltd.             | Pharmacy   | Hospital Road-(PDP Hq House), Gusau                | Gusau    | Zamfara |
| 7470 | ZF/0016 | ZF/0016/S/4  | U.K. Pharmacy Ltd.                   | Pharmacy   | Hospital Road, (PDP Hq House), Gusau               | Gusau    | Zamfara |
| 7471 | ZF/0021 | ZF/0021/S/15 | Federal Medical Centre Gusau         |            | Gusau                                              | Gusau    | Zamfara |
| 7472 | ZF/0021 | ZF/0021/S/8  | Federal Medical Centre Gusau         |            | Gusau                                              | Gusau    | Zamfara |
| 7473 | ZF/0021 | ZF/0021/S/5  | Federal Medical Centre Gusau         |            | Gusau                                              | Gusau    | Zamfara |
| 7474 | ZF/0021 | ZF/0021/S/2  | Federal Medical Centre Gusau         |            | Gusau                                              | Gusau    | Zamfara |
| 7475 | ZF/0021 | ZF/0021/S/1  | Federal Medical Centre Gusau         |            | Gusau                                              | Gusau    | Zamfara |
| 7476 | ZF/0021 | ZF/0021/S/7  | Federal Medical Centre Gusau         |            | Gusau                                              | Gusau    | Zamfara |
| 7477 | ZF/0021 | ZF/0021/S/11 | Federal Medical Centre Gusau         |            | Gusau                                              | Gusau    | Zamfara |
| 7478 | ZF/0021 | ZF/0021/S/4  | Federal Medical Centre Gusau         |            | Gusau                                              | Gusau    | Zamfara |
| 7479 | ZF/0021 | ZF/0021/S/10 | Federal Medical Centre Gusau         |            | Gusau                                              | Gusau    | Zamfara |
| 7480 | ZF/0021 | ZF/0021/S/12 | Federal Medical Centre Gusau         |            | Gusau                                              | Gusau    | Zamfara |
| 7481 | ZF/0021 | ZF/0021/S/3  | Federal Medical Centre Gusau         |            | Gusau                                              | Gusau    | Zamfara |
| 7482 | ZF/0021 | ZF/0021/S/6  | Federal Medical Centre Gusau         |            | Gusau                                              | Gusau    | Zamfara |
| 7483 | ZF/0022 | ZF/0022/S/4  | Rayad's Pharmacy Ltd.                | Pharmacy   | Off K/Namoda Road, Lebin-Lebin, Gusau              | Gusau    | Zamfara |
| 7484 | ZF/0029 | ZF/0029/S/6  | Yariman Bakura Specialist Hospital   |            | Kawa Namoda Road, Tudun Wada, Gusau, Zamfara State | Gusau    | Zamfara |
| 7485 | ZF/0029 | ZF/0029/S/4  | Yariman Bakura Specialist Hospital   |            | Kawa Namoda Road, Tudun Wada, Gusau, Zamfara State | Gusau    | Zamfara |
| 7486 | ZF/0029 | ZF/0029/S/7  | Yariman Bakura Specialist Hospital   |            | Kawa Namoda Road, Tudun Wada, Gusau, Zamfara State | Gusau    | Zamfara |
| 7487 | ZF/0029 | ZF/0029/S/8  | Yariman Bakura Specialist Hospital   |            | Kawa Namoda Road, Tudun Wada, Gusau, Zamfara State | Gusau    | Zamfara |
| 7488 | ZF/0029 | ZF/0029/S/2  | Yariman Bakura Specialist Hospital   |            | Kawa Namoda Road, Tudun Wada, Gusau, Zamfara State | Gusau    | Zamfara |
| 7489 | ZF/0029 | ZF/0029/S/5  | Yariman Bakura Specialist Hospital   |            | Kawa Namoda Road, Tudun Wada, Gusau, Zamfara State | Gusau    | Zamfara |
| 7490 | ZF/0029 | ZF/0029/S/15 | Yariman Bakura Specialist Hospital   |            | Kawa Namoda Road, Tudun Wada, Gusau, Zamfara State | Gusau    | Zamfara |
| 7491 | ZF/0029 | ZF/0029/S/3  | Yariman Bakura Specialist Hospital   |            | Kawa Namoda Road, Tudun Wada, Gusau, Zamfara State | Gusau    | Zamfara |
| 7492 | ZF/0029 | ZF/0029/S/1  | Yariman Bakura Specialist Hospital   |            | Kawa Namoda Road, Tudun Wada, Gusau, Zamfara State | Gusau    | Zamfara |
